# Supplementary material for: Purple phototrophic bacteria release crotonate as metabolic overflow pathway to complement other redox-balancing routes
Source: Research Square preprint supplement (doi:10.21203/rs.3.rs-7242062/v1), 2025-09-02
Supplement: Supplementary file 1 [file 3bebbe712f8350d0c197f49c.xlsx]

## Sheet: palustris
						Species/group adjusted
Protein Description	Protein Name	Protein Accession	Protein Species	Car3/Car2	P-Value	mean Car2	mean car3	Car3/Car22	p value	Columna18	Columna19	Columna20	Columna21	Columna22	Columna23	Columna24	Columna25	Columna26	Columna27	Columna28	Columna29	Columna30	Columna31	Columna32	Columna33	Columna34	Columna35	Columna36	Columna37	Columna38	Columna39	Columna40	Columna41	Columna42	Columna43	Columna44	Columna45	Columna46	Columna47	Columna48	Columna49	Columna50	Columna51	Columna52	Columna53	Columna54	Columna55	Columna56	Columna57
Response regulatory domain-containing protein	tr|Q20Z82|Q20Z82_RHOPB	Q20Z82	Rhodopseudomonas palustris (strain BisB18)	2.9827	0.00151833	12616.7	39296.1	3.11461	0.00246171
Methyl-accepting chemotaxis sensory transducer	tr|Q211L8|Q211L8_RHOPB	Q211L8	Rhodopseudomonas palustris (strain BisB18)	0.7172	0.578576	2695.49	1788.75	0.663608	0.287297
maltose alpha-D-glucosyltransferase (EC 5.4.99.16) (Maltose alpha-D-glucosyltransferase)	tr|Q210H2|Q210H2_RHOPB	Q210H2	Rhodopseudomonas palustris (strain BisB18)	2.3707	0.0182888	2906.64	6650.68	2.2881	0.000623613
O-acetylhomoserine/O-acetylserine sulfhydrylase (EC 2.5.1.49)	tr|Q214E6|Q214E6_RHOPB	Q214E6	Rhodopseudomonas palustris (strain BisB18)	1.0802	0.756163	12413.5	13304	1.07173	0.382073
TonB-dependent receptor, plug	tr|Q21D73|Q21D73_RHOPB	Q21D73	Rhodopseudomonas palustris (strain BisB18)	0.7138	0.617758	7633.05	4814.39	0.63073	0.421421
Oligopeptidase B. Serine peptidase. MEROPS family S09A (EC 3.4.21.83)	tr|Q219P2|Q219P2_RHOPB	Q219P2	Rhodopseudomonas palustris (strain BisB18)	1.6978	0.0315561	15276.7	21740.9	1.42314	0.00712843
Glutamate synthase (NADH) large subunit (EC 1.4.1.14)	tr|Q21BA4|Q21BA4_RHOPB	Q21BA4	Rhodopseudomonas palustris (strain BisB18)	0.7867	0.34026	12882.4	10151.3	0.787997	0.110897
Adenylate kinase (AK) (EC 2.7.4.3) (ATP-AMP transphosphorylase) (ATP:AMP phosphotransferase) (Adenylate monophosphate kinase)	tr|Q211G9|Q211G9_RHOPB	Q211G9	Rhodopseudomonas palustris (strain BisB18)	1.0567	0.802345	73159.4	76672.7	1.04802	0.458627
SurA_N domain-containing protein	tr|Q215S2|Q215S2_RHOPB	Q215S2	Rhodopseudomonas palustris (strain BisB18)	0.681	0.295613	4252.92	3485.1	0.819461	0.100751
Acyl-CoA dehydrogenase-like	tr|Q216A2|Q216A2_RHOPB	Q216A2	Rhodopseudomonas palustris (strain BisB18)	1.367	0.194816	9544.51	12230.4	1.2814	0.00342774
Thiosulphate-binding protein	tr|Q20Z92|Q20Z92_RHOPB	Q20Z92	Rhodopseudomonas palustris (strain BisB18)	0.3549	0.0876851	45540.8	21054	0.462311	0.0260296
Amidase	tr|Q218D9|Q218D9_RHOPB	Q218D9	Rhodopseudomonas palustris (strain BisB18)	1.1513	0.506495	5148.35	5291.26	1.02776	0.830836
D-3-phosphoglycerate dehydrogenase (EC 1.1.1.95)	tr|Q20Z04|Q20Z04_RHOPB	Q20Z04	Rhodopseudomonas palustris (strain BisB18)	0.8049	0.424234	113132	89052.3	0.787153	0.0676555
Inorganic pyrophosphatase (EC 3.6.1.1) (Pyrophosphate phospho-hydrolase) (PPase)	tr|Q21DB7|Q21DB7_RHOPB	Q21DB7	Rhodopseudomonas palustris (strain BisB18)	1.0666	0.809614	93436.3	97533.1	1.04385	0.677316
Nitrogenase iron protein (EC 1.18.6.1) (Nitrogenase Fe protein) (Nitrogenase component II) (Nitrogenase reductase)	tr|Q20Y00|Q20Y00_RHOPB	Q20Y00	Rhodopseudomonas palustris (strain BisB18)	0.8533	0.624885	4747.81	3842.14	0.809245	0.208696
Cysteine synthase (EC 2.5.1.47)	tr|Q210L2|Q210L2_RHOPB	Q210L2	Rhodopseudomonas palustris (strain BisB18)	1.1714	0.608415	597779	693545	1.1602	0.307225
Negative regulator of septation ring formation	tr|Q219B9|Q219B9_RHOPB	Q219B9	Rhodopseudomonas palustris (strain BisB18)	1.1586	0.477715	5502.81	7032.28	1.27794	0.00997726
Xanthine dehydrogenase, molybdenum binding subunit apoprotein (EC 1.17.1.4)	tr|Q20XT5|Q20XT5_RHOPB	Q20XT5	Rhodopseudomonas palustris (strain BisB18)	1.2176	0.465473	5179.71	6384.63	1.23262	0.0944071
Polyphosphate kinase (EC 2.7.4.1) (ATP-polyphosphate phosphotransferase) (Polyphosphoric acid kinase)	tr|Q215Q3|Q215Q3_RHOPB	Q215Q3	Rhodopseudomonas palustris (strain BisB18)	2.5952	0.00813019	10432.6	24739.3	2.37135	8.20005e-05
3-oxoacyl-[acyl-carrier-protein] synthase I (EC 2.3.1.41)	tr|Q21CG3|Q21CG3_RHOPB	Q21CG3	Rhodopseudomonas palustris (strain BisB18)	1.2678	0.25906	30731	39999.9	1.30161	0.00713325
tRNA pseudouridine synthase B (EC 5.4.99.25) (tRNA pseudouridine(55) synthase) (Psi55 synthase) (tRNA pseudouridylate synthase) (tRNA-uridine isomerase)	tr|Q21C29|Q21C29_RHOPB	Q21C29	Rhodopseudomonas palustris (strain BisB18)	0.7169	0.183233	39616.7	6907.75	0.174364	0.0203697
O-acetylhomoserine/O-acetylserine sulfhydrylase (EC 2.5.1.49)	tr|Q20Z54|Q20Z54_RHOPB	Q20Z54	Rhodopseudomonas palustris (strain BisB18)	1.1501	0.766029	333427	375429	1.12597	0.684692
Porphobilinogen deaminase (EC 2.5.1.61) (Hydroxymethylbilane synthase) (Pre-uroporphyrinogen synthase)	tr|Q219X5|Q219X5_RHOPB	Q219X5	Rhodopseudomonas palustris (strain BisB18)	1.0574	0.83162	68900.8	72050.7	1.04572	0.648349
Metalloprotease TldD	tr|Q20X29|Q20X29_RHOPB	Q20X29	Rhodopseudomonas palustris (strain BisB18)	1.5548	0.0743415	7534.88	11421.2	1.51578	0.00381376
Peptidase M3B, oligoendopeptidase-related clade 3	tr|Q20ZD6|Q20ZD6_RHOPB	Q20ZD6	Rhodopseudomonas palustris (strain BisB18)	0.8728	0.642183	16166.7	14909.7	0.922247	0.481237
Succinate dehydrogenase flavoprotein subunit (EC 1.3.5.1)	tr|Q21D87|Q21D87_RHOPB	Q21D87	Rhodopseudomonas palustris (strain BisB18)	0.8632	0.610728	24268.2	21391.8	0.881473	0.33729
3-hydroxyacyl-CoA dehydrogenase (EC 1.1.1.35)	tr|Q21BD0|Q21BD0_RHOPB	Q21BD0	Rhodopseudomonas palustris (strain BisB18)	1.5643	0.155248	54949.2	84126.4	1.53098	0.00749895
DNA topoisomerase 1 (EC 5.6.2.1) (DNA topoisomerase I)	tr|Q215Z3|Q215Z3_RHOPB	Q215Z3	Rhodopseudomonas palustris (strain BisB18)	0.7065	0.142547	4506.24	3355.93	0.744731	0.00234435
Chaperone protein ClpB	tr|Q20YI5|Q20YI5_RHOPB	Q20YI5	Rhodopseudomonas palustris (strain BisB18)	1.5459	0.0519092	6664.5	10056.8	1.50901	0.00801364
Co-chaperonin GroES (10 kDa chaperonin) (Chaperonin-10) (Cpn10)	tr|Q20X89|Q20X89_RHOPB	Q20X89	Rhodopseudomonas palustris (strain BisB18)	0.6615	0.284064	193242	129202	0.668604	0.15069
Sulfide dehydrogenase (Flavoprotein) subunit SudB / sulfide dehydrogenase (Flavoprotein) subunit SudA (EC 1.97.-.-)	tr|Q21BG1|Q21BG1_RHOPB	Q21BG1	Rhodopseudomonas palustris (strain BisB18)	0.6092	0.250768	39914.7	26650.1	0.667676	0.0744725
Secretion protein HlyD	tr|Q20XE9|Q20XE9_RHOPB	Q20XE9	Rhodopseudomonas palustris (strain BisB18)	0.9644	0.880564	3541.05	3424.34	0.967041	0.761004
Enoyl-[acyl-carrier-protein] reductase [NADH] (EC 1.3.1.9)	tr|Q21A83|Q21A83_RHOPB	Q21A83	Rhodopseudomonas palustris (strain BisB18)	1.0375	0.869611	43939.3	45098.9	1.02639	0.670684
Thioredoxin reductase (EC 1.8.1.9)	tr|Q20ZR4|Q20ZR4_RHOPB	Q20ZR4	Rhodopseudomonas palustris (strain BisB18)	1.1503	0.377261	5209.36	5878.79	1.1285	0.214618
Succinate dehydrogenase iron-sulfur subunit (EC 1.3.5.1)_x000D_ Succinate dehydrogenase iron-sulfur subunit (EC 1.3.5.1)_x000D_ Succinate dehydrogenase iron-sulfur subunit (EC 1.3.5.1)_x000D_ Succinate dehydrogenase iron-sulfur subunit (EC 1.3.5.1)_x000D_ Succinate dehydrogenase iron-sulfur subunit (EC 1.3.5.1)_x000D_ Succinate dehydrogenase iron-sulfur subunit (EC 1.3.5.1)_x000D_ Succinate dehyd…	tr|Q21D89|Q21D89_RHOPB / tr|Q13DX3|Q13DX3_RHOPS / tr|E6VJR1|E6VJR1_RHOPX / tr|Q6ND93|Q6ND93_RHOPA / tr|B3Q787|B3Q787_RHOPT / tr|Q2J3C5|Q2J3C5_RHOP2 / tr|A0A0N0KGL3|A0A0N0KGL3_9BRAD / tr|A0A418VJ95|A0A418VJ95_RHOPL / tr|A0A2R4GMU9|A0A2R4GMU9_RHOPL / tr|A0A336K2Z8|A0A336K2Z8_9BRAD / tr|A0A323UF54|A0A323UF54_RHOPL / tr|A0A1H8X760|A0A1H8X760_9BRAD	Q21D89 / Q13DX3 / E6VJR1 / Q6ND93 / B3Q787 / Q2J3C5 / A0A0N0KGL3 / A0A418VJ95 / A0A2R4GMU9 / A0A336K2Z8 / A0A323UF54 / A0A1H8X760	Rhodopseudomonas palustris (strain BisB18) / Rhodopseudomonas palustris (strain BisB5) / Rhodopseudomonas palustris (strain DX-1) / Rhodopseudomonas palustris (strain ATCC BAA-98 / CGA009) / Rhodopseudomonas palustris (strain TIE-1) / Rhodopseudomonas palustris (strain HaA2) / Rhodopseudomonas sp. AAP120 / Rhodopseudomonas palustris / Rhodopseudomonas palustris / Rhodopseudomonas pentothenatexige…	1.0898	0.762014	21809.2	23509.2	1.07795	0.576449
Two component transcriptional regulator, winged helix family_x000D_ Two component transcriptional regulator, winged helix family_x000D_ Two-component transcriptional regulator FeuP, winged helix family_x000D_ Two component transcriptional regulator, winged helix family_x000D_ Two component transcriptional regulator, winged helix family_x000D_ Two component transcriptional regulator, winged helix …	tr|Q217P7|Q217P7_RHOPB / tr|E6VDW1|E6VDW1_RHOPX / tr|Q6N8I8|Q6N8I8_RHOPA / tr|B3QBP8|B3QBP8_RHOPT / tr|Q139K7|Q139K7_RHOPS / tr|Q2IUG0|Q2IUG0_RHOP2 / tr|A0A0N1CEI3|A0A0N1CEI3_9BRAD / tr|A0A323UK77|A0A323UK77_RHOPL / tr|A0A2R4GSK9|A0A2R4GSK9_RHOPL / tr|A0A0D7F1T6|A0A0D7F1T6_RHOPL / tr|A0A418VE41|A0A418VE41_RHOPL / tr|A0A336JWE0|A0A336JWE0_9BRAD / tr|A0A1H8S4Y0|A0A1H8S4Y0_9BRAD	Q217P7 / E6VDW1 / Q6N8I8 / B3QBP8 / Q139K7 / Q2IUG0 / A0A0N1CEI3 / A0A323UK77 / A0A2R4GSK9 / A0A0D7F1T6 / A0A418VE41 / A0A336JWE0 / A0A1H8S4Y0	Rhodopseudomonas palustris (strain BisB18) / Rhodopseudomonas palustris (strain DX-1) / Rhodopseudomonas palustris (strain ATCC BAA-98 / CGA009) / Rhodopseudomonas palustris (strain TIE-1) / Rhodopseudomonas palustris (strain BisB5) / Rhodopseudomonas palustris (strain HaA2) / Rhodopseudomonas sp. AAP120 / Rhodopseudomonas palustris / Rhodopseudomonas palustris / Rhodopseudomonas palustris / Rhod…	1.2512	0.234479	9793.57	9442.94	0.964199	0.841558
Ribonuclease E (RNase E) (EC 3.1.26.12)	tr|Q213N4|Q213N4_RHOPB	Q213N4	Rhodopseudomonas palustris (strain BisB18)	1.1618	0.59268	10829.1	12607.4	1.16421	0.0384757
histidine kinase (EC 2.7.13.3)_x000D_ histidine kinase (EC 2.7.13.3)_x000D_ histidine kinase (EC 2.7.13.3)_x000D_ histidine kinase (EC 2.7.13.3)_x000D_ histidine kinase (EC 2.7.13.3)_x000D_ histidine kinase (EC 2.7.13.3)_x000D_ histidine kinase (EC 2.7.13.3)_x000D_ histidine kinase (EC 2.7.13.3)_x000D_ histidine kinase (EC 2.7.13.3)_x000D_ histidine kinase (EC 2.7.13.3)	tr|Q21D62|Q21D62_RHOPB / tr|E6VH18|E6VH18_RHOPX / tr|Q6N0H2|Q6N0H2_RHOPA / tr|Q2IR11|Q2IR11_RHOP2 / tr|B3QDA3|B3QDA3_RHOPT / tr|Q12ZZ7|Q12ZZ7_RHOPS / tr|A0A418VF01|A0A418VF01_RHOPL / tr|A0A2R4H1B4|A0A2R4H1B4_RHOPL / tr|A0A336JIP6|A0A336JIP6_9BRAD / tr|A0A1H8M2K7|A0A1H8M2K7_9BRAD	Q21D62 / E6VH18 / Q6N0H2 / Q2IR11 / B3QDA3 / Q12ZZ7 / A0A418VF01 / A0A2R4H1B4 / A0A336JIP6 / A0A1H8M2K7	Rhodopseudomonas palustris (strain BisB18) / Rhodopseudomonas palustris (strain DX-1) / Rhodopseudomonas palustris (strain ATCC BAA-98 / CGA009) / Rhodopseudomonas palustris (strain HaA2) / Rhodopseudomonas palustris (strain TIE-1) / Rhodopseudomonas palustris (strain BisB5) / Rhodopseudomonas palustris / Rhodopseudomonas palustris / Rhodopseudomonas pentothenatexigens / Rhodopseudomonas pseudopa…	1.3544	0.434462	3787.26	4817.7	1.27208	0.135765
Peptidase T. Metallo peptidase. MEROPS family M20B_x000D_ Peptidase T (EC 3.4.11.4)_x000D_ Peptidase T. Metallo peptidase. MEROPS family M20B_x000D_ Peptidase T (EC 3.4.11.4)_x000D_ Peptidase T (EC 3.4.11.4)_x000D_ Peptidase T (EC 3.4.11.4)	tr|Q215I8|Q215I8_RHOPB / tr|E6VFI4|E6VFI4_RHOPX / tr|Q2IWY8|Q2IWY8_RHOP2 / tr|A0A0N1CDI5|A0A0N1CDI5_9BRAD / tr|A0A418UY53|A0A418UY53_RHOPL / tr|A0A0D7EJA2|A0A0D7EJA2_RHOPL	Q215I8 / E6VFI4 / Q2IWY8 / A0A0N1CDI5 / A0A418UY53 / A0A0D7EJA2	Rhodopseudomonas palustris (strain BisB18) / Rhodopseudomonas palustris (strain DX-1) / Rhodopseudomonas palustris (strain HaA2) / Rhodopseudomonas sp. AAP120 / Rhodopseudomonas palustris / Rhodopseudomonas palustris	0.7401	0.453059	7246.42	6844.23	0.944498	0.588727
Transketolase (EC 2.2.1.1)	tr|Q213J1|Q213J1_RHOPB	Q213J1	Rhodopseudomonas palustris (strain BisB18)	0.8419	0.45995	60498.5	50211.4	0.829961	0.02387
Acyl-CoA dehydrogenase-like_x000D_ Putative acyl-CoA dehydrogenase (EC 1.3.99.3)_x000D_ Acyl-CoA dehydrogenase domain protein_x000D_ Acyl-CoA dehydrogenase_x000D_ Acyl-CoA dehydrogenase_x000D_ Acyl-CoA dehydrogenase_x000D_ Acyl-CoA dehydrogenase_x000D_ Acyl-CoA dehydrogenase_x000D_ Acyl-CoA dehydrogenase domain protein	tr|Q21BC8|Q21BC8_RHOPB / tr|Q6NBL2|Q6NBL2_RHOPA / tr|B3QEG3|B3QEG3_RHOPT / tr|A0A0N1CBU3|A0A0N1CBU3_9BRAD / tr|A0A2R4GPJ0|A0A2R4GPJ0_RHOPL / tr|A0A418UZ09|A0A418UZ09_RHOPL / tr|A0A323UUZ9|A0A323UUZ9_RHOPL / tr|A0A336K645|A0A336K645_9BRAD / tr|E6VBN2|E6VBN2_RHOPX	Q21BC8 / Q6NBL2 / B3QEG3 / A0A0N1CBU3 / A0A2R4GPJ0 / A0A418UZ09 / A0A323UUZ9 / A0A336K645 / E6VBN2	Rhodopseudomonas palustris (strain BisB18) / Rhodopseudomonas palustris (strain ATCC BAA-98 / CGA009) / Rhodopseudomonas palustris (strain TIE-1) / Rhodopseudomonas sp. AAP120 / Rhodopseudomonas palustris / Rhodopseudomonas palustris / Rhodopseudomonas palustris / Rhodopseudomonas pentothenatexigens / Rhodopseudomonas palustris (strain DX-1)	1.4655	0.0408847	7534.98	10738.9	1.42521	0.0168392
Isoleucine--tRNA ligase (EC 6.1.1.5) (Isoleucyl-tRNA synthetase) (IleRS)	tr|Q219H9|Q219H9_RHOPB	Q219H9	Rhodopseudomonas palustris (strain BisB18)	0.934	0.80824	10043.3	9199.7	0.916004	0.478906
Acetylornithine aminotransferase (ACOAT) (EC 2.6.1.11)_x000D_ Acetylornithine aminotransferase (ACOAT) (EC 2.6.1.11)_x000D_ Acetylornithine aminotransferase (ACOAT) (EC 2.6.1.11)_x000D_ Acetylornithine aminotransferase (ACOAT) (EC 2.6.1.11)_x000D_ Acetylornithine aminotransferase (ACOAT) (EC 2.6.1.11)_x000D_ Acetylornithine aminotransferase (ACOAT) (EC 2.6.1.11)	tr|Q20WP8|Q20WP8_RHOPB / tr|Q07GY1|Q07GY1_RHOP5 / tr|Q13CQ6|Q13CQ6_RHOPS / tr|A0A0N1C4I5|A0A0N1C4I5_9BRAD / tr|A0A0D7F5Z2|A0A0D7F5Z2_RHOPL / tr|A0A1H8TT87|A0A1H8TT87_9BRAD	Q20WP8 / Q07GY1 / Q13CQ6 / A0A0N1C4I5 / A0A0D7F5Z2 / A0A1H8TT87	Rhodopseudomonas palustris (strain BisB18) / Rhodopseudomonas palustris (strain BisA53) / Rhodopseudomonas palustris (strain BisB5) / Rhodopseudomonas sp. AAP120 / Rhodopseudomonas palustris / Rhodopseudomonas pseudopalustris	0.7708	0.267284	16942	12997.7	0.767184	0.0045849
Aspartokinase (EC 2.7.2.4)	tr|Q21BZ7|Q21BZ7_RHOPB	Q21BZ7	Rhodopseudomonas palustris (strain BisB18)	0.9218	0.754611	16460.7	15748.4	0.956729	0.570837
Bacterial translation initiation factor 3 (BIF-3)	tr|Q21CH0|Q21CH0_RHOPB	Q21CH0	Rhodopseudomonas palustris (strain BisB18)	0.942	0.753897	17418	15836.9	0.909223	0.533365
Transcription termination/antitermination protein NusG	tr|Q211C3|Q211C3_RHOPB	Q211C3	Rhodopseudomonas palustris (strain BisB18)	1.1655	0.50411	21090.8	24613.9	1.16705	0.133477
Chromosome partition protein Smc	tr|Q20Y89|Q20Y89_RHOPB	Q20Y89	Rhodopseudomonas palustris (strain BisB18)	0.4969	0.0703632	2810.26	2121.15	0.754788	0.0418446
Lysine--tRNA ligase (EC 6.1.1.6) (Lysyl-tRNA synthetase) (LysRS)	tr|Q21BD5|Q21BD5_RHOPB	Q21BD5	Rhodopseudomonas palustris (strain BisB18)	0.8749	0.604213	8292.59	8702.4	1.04942	0.294002
Alpha-2-macroglobulin-like	tr|Q214U4|Q214U4_RHOPB	Q214U4	Rhodopseudomonas palustris (strain BisB18)	1.2448	0.450413	2503.98	2745.63	1.0965	0.690177
Lysine-arginine-ornithine-binding periplasmic protein	tr|Q214T7|Q214T7_RHOPB	Q214T7	Rhodopseudomonas palustris (strain BisB18)	1.2073	0.619409	19042.4	22061.7	1.15856	0.380496
Extracellular solute-binding protein, family 1_x000D_ Iron ABC transporter substrate-binding protein	tr|Q20ZG3|Q20ZG3_RHOPB / tr|A0A0D7DYN5|A0A0D7DYN5_RHOPL	Q20ZG3 / A0A0D7DYN5	Rhodopseudomonas palustris (strain BisB18) / Rhodopseudomonas palustris	4.7601	0.0354695	1385.98	5010.55	3.61517	0.0449881
N-acetyl-gamma-glutamyl-phosphate reductase (AGPR) (EC 1.2.1.38) (N-acetyl-glutamate semialdehyde dehydrogenase) (NAGSA dehydrogenase)	tr|Q213R5|Q213R5_RHOPB	Q213R5	Rhodopseudomonas palustris (strain BisB18)	1.1088	0.608195	13168.9	15941.1	1.21051	0.0315357
CobQ/CobB/MinD/ParA nucleotide binding domain-containing protein	tr|Q20Y85|Q20Y85_RHOPB	Q20Y85	Rhodopseudomonas palustris (strain BisB18)	1.6715	0.0111869	11857.7	19691.7	1.66066	0.000658329
RNA polymerase sigma factor RpoD (Sigma-70)	tr|Q21AP5|Q21AP5_RHOPB	Q21AP5	Rhodopseudomonas palustris (strain BisB18)	1.0115	0.965415	12496.9	12886.7	1.03119	0.694217
Pyruvate dehydrogenase E1 component subunit beta (EC 1.2.4.1)_x000D_ Pyruvate dehydrogenase E1 component subunit beta (EC 1.2.4.1)	tr|Q214Z5|Q214Z5_RHOPB / tr|Q2IWD8|Q2IWD8_RHOP2	Q214Z5 / Q2IWD8	Rhodopseudomonas palustris (strain BisB18) / Rhodopseudomonas palustris (strain HaA2)	1.1832	0.586059	4876.7	5946.1	1.21929	0.22971
Mg-protoporphyrin IX chelatase (EC 6.6.1.1)	tr|Q219X3|Q219X3_RHOPB	Q219X3	Rhodopseudomonas palustris (strain BisB18)	1.1795	0.48341	13011.3	15548.7	1.19502	0.446306
Carbon-monoxide dehydrogenase (EC 1.2.99.2)	tr|Q20XT4|Q20XT4_RHOPB	Q20XT4	Rhodopseudomonas palustris (strain BisB18)	1.5386	0.107579	4426.62	6791.79	1.53431	0.0126112
DNA topoisomerase 4 subunit B (EC 5.6.2.2) (Topoisomerase IV subunit B)	tr|Q213R1|Q213R1_RHOPB	Q213R1	Rhodopseudomonas palustris (strain BisB18)	0.7081	0.101547	3852.92	2771.54	0.719336	0.00932132
Carbamoyl-phosphate synthase large chain (EC 6.3.5.5) (Carbamoyl-phosphate synthetase ammonia chain)	tr|Q20ZR7|Q20ZR7_RHOPB	Q20ZR7	Rhodopseudomonas palustris (strain BisB18)	0.9665	0.861467	16253.6	16208.1	0.997201	0.982657
Glutamine-dependent NAD(+) synthetase (EC 6.3.5.1) (NAD(+) synthase [glutamine-hydrolyzing])_x000D_ Glutamine-dependent NAD(+) synthetase (EC 6.3.5.1) (NAD(+) synthase [glutamine-hydrolyzing])_x000D_ Glutamine-dependent NAD(+) synthetase (EC 6.3.5.1) (NAD(+) synthase [glutamine-hydrolyzing])_x000D_ Glutamine-dependent NAD(+) synthetase (EC 6.3.5.1) (NAD(+) synthase [glutamine-hydrolyzing])_x000D_…	tr|Q216Q0|Q216Q0_RHOPB / tr|Q07Q47|Q07Q47_RHOP5 / tr|Q6N8B8|Q6N8B8_RHOPA / tr|Q2IUN3|Q2IUN3_RHOP2 / tr|Q139E4|Q139E4_RHOPS / tr|E6VDP4|E6VDP4_RHOPX / tr|B3QCR5|B3QCR5_RHOPT / tr|A0A0N1LS44|A0A0N1LS44_9BRAD / tr|A0A323UY01|A0A323UY01_RHOPL / tr|A0A418V2D4|A0A418V2D4_RHOPL / tr|A0A2R4GSU2|A0A2R4GSU2_RHOPL / tr|A0A0D7DYZ0|A0A0D7DYZ0_RHOPL / tr|A0A336JXC3|A0A336JXC3_9BRAD / tr|A0A1H8S749|A0A1H8S749_9…	Q216Q0 / Q07Q47 / Q6N8B8 / Q2IUN3 / Q139E4 / E6VDP4 / B3QCR5 / A0A0N1LS44 / A0A323UY01 / A0A418V2D4 / A0A2R4GSU2 / A0A0D7DYZ0 / A0A336JXC3 / A0A1H8S749	Rhodopseudomonas palustris (strain BisB18) / Rhodopseudomonas palustris (strain BisA53) / Rhodopseudomonas palustris (strain ATCC BAA-98 / CGA009) / Rhodopseudomonas palustris (strain HaA2) / Rhodopseudomonas palustris (strain BisB5) / Rhodopseudomonas palustris (strain DX-1) / Rhodopseudomonas palustris (strain TIE-1) / Rhodopseudomonas sp. AAP120 / Rhodopseudomonas palustris / Rhodopseudomonas …	0.8608	0.55866	2049.22	2300.84	1.12279	0.545073
Beta-ketoacyl-[acyl-carrier-protein] synthase III (Beta-ketoacyl-ACP synthase III) (KAS III) (EC 2.3.1.180) (3-oxoacyl-[acyl-carrier-protein] synthase 3) (3-oxoacyl-[acyl-carrier-protein] synthase III)	tr|Q214G1|Q214G1_RHOPB	Q214G1	Rhodopseudomonas palustris (strain BisB18)	1.034	0.87508	30191.4	30979	1.02609	0.696308
Flagellin_D0/D1 domain-containing protein	tr|Q218Y7|Q218Y7_RHOPB	Q218Y7	Rhodopseudomonas palustris (strain BisB18)	0.969	0.918173	1488.81	1436.74	0.965028	0.812512
Malate synthase G (EC 2.3.3.9)	tr|Q20Z88|Q20Z88_RHOPB	Q20Z88	Rhodopseudomonas palustris (strain BisB18)	0.777	0.299201	33757.6	26559	0.786756	0.0750979
DUF2147 domain-containing protein	tr|Q219A9|Q219A9_RHOPB	Q219A9	Rhodopseudomonas palustris (strain BisB18)	0.6979	0.279917	39276.7	29944.9	0.762409	0.116348
2-methylcitrate dehydratase_x000D_ MmgE/PrpD family protein	tr|A0A1H8UFK0|A0A1H8UFK0_9BRAD / tr|A0A323UMJ1|A0A323UMJ1_RHOPL	A0A1H8UFK0 / A0A323UMJ1	Rhodopseudomonas pseudopalustris / Rhodopseudomonas palustris	1.1093	0.71732	4264.2	4764.14	1.11724	0.507349
30S ribosomal protein S2_x000D_ 30S ribosomal protein S2	tr|A0A1H8T9Z3|A0A1H8T9Z3_9BRAD / sp|Q136A4|RS2_RHOPS	A0A1H8T9Z3 / Q136A4	Rhodopseudomonas pseudopalustris / Rhodopseudomonas palustris (strain BisB5)	0.9622	0.854382	132120	126688	0.958886	0.621822
Ketol-acid reductoisomerase (NADP(+)) (KARI) (EC 1.1.1.86) (Acetohydroxy-acid isomeroreductase) (AHIR) (Alpha-keto-beta-hydroxylacyl reductoisomerase)_x000D_ Ketol-acid reductoisomerase (NADP(+)) (KARI) (EC 1.1.1.86) (Acetohydroxy-acid isomeroreductase) (AHIR) (Alpha-keto-beta-hydroxylacyl reductoisomerase) (Ketol-acid reductoisomerase type 1) (Ketol-acid reductoisomerase type I)	tr|A0A1H8SB04|A0A1H8SB04_9BRAD / sp|Q139A2|ILVC_RHOPS	A0A1H8SB04 / Q139A2	Rhodopseudomonas pseudopalustris / Rhodopseudomonas palustris (strain BisB5)	1.2235	0.439727	138500	168871	1.21928	0.0713614
Pyruvate-ferredoxin/flavodoxin oxidoreductase_x000D_ Pyruvate flavodoxin/ferredoxin oxidoreductase-like	tr|A0A1H8TPG5|A0A1H8TPG5_9BRAD / tr|Q13CJ2|Q13CJ2_RHOPS	A0A1H8TPG5 / Q13CJ2	Rhodopseudomonas pseudopalustris / Rhodopseudomonas palustris (strain BisB5)	0.6995	0.192326	56792.4	39270.8	0.69148	0.00492624
Aldehyde dehydrogenase (NAD+)_x000D_ Aldehyde dehydrogenase_x000D_ Aldehyde dehydrogenase	tr|A0A1H8SEZ8|A0A1H8SEZ8_9BRAD / tr|Q138N9|Q138N9_RHOPS / tr|Q2IV15|Q2IV15_RHOP2	A0A1H8SEZ8 / Q138N9 / Q2IV15	Rhodopseudomonas pseudopalustris / Rhodopseudomonas palustris (strain BisB5) / Rhodopseudomonas palustris (strain HaA2)	1.0588	0.902501	14656.6	15284.7	1.04285	0.869811
Catalase-peroxidase (CP) (EC 1.11.1.21) (Peroxidase/catalase)_x000D_ Catalase-peroxidase (CP) (EC 1.11.1.21) (Peroxidase/catalase)	tr|A0A1H8MLC9|A0A1H8MLC9_9BRAD / sp|Q13EM6|KATG_RHOPS	A0A1H8MLC9 / Q13EM6	Rhodopseudomonas pseudopalustris / Rhodopseudomonas palustris (strain BisB5)	1.9067	0.0599336	12686.4	22207.8	1.75052	0.00316443
Aminotransferase (EC 2.6.1.-)_x000D_ Aminotransferase (EC 2.6.1.-)_x000D_ Aminotransferase (EC 2.6.1.-)_x000D_ Aminotransferase (EC 2.6.1.-)_x000D_ Aminotransferase (EC 2.6.1.-)	tr|A0A1H8W1X9|A0A1H8W1X9_9BRAD / tr|Q2IVU1|Q2IVU1_RHOP2 / tr|Q137L5|Q137L5_RHOPS / tr|A0A0N1LUZ0|A0A0N1LUZ0_9BRAD / tr|A0A418UX47|A0A418UX47_RHOPL	A0A1H8W1X9 / Q2IVU1 / Q137L5 / A0A0N1LUZ0 / A0A418UX47	Rhodopseudomonas pseudopalustris / Rhodopseudomonas palustris (strain HaA2) / Rhodopseudomonas palustris (strain BisB5) / Rhodopseudomonas sp. AAP120 / Rhodopseudomonas palustris	1.0385	0.872612	46335.3	47797.5	1.03156	0.488291
O-succinylhomoserine sulfhydrylase (OSH sulfhydrylase) (OSHS sulfhydrylase) (EC 2.5.1.-)_x000D_ O-succinylhomoserine sulfhydrylase (OSH sulfhydrylase) (OSHS sulfhydrylase) (EC 2.5.1.-)	tr|A0A1H8TT83|A0A1H8TT83_9BRAD / tr|Q13CP8|Q13CP8_RHOPS	A0A1H8TT83 / Q13CP8	Rhodopseudomonas pseudopalustris / Rhodopseudomonas palustris (strain BisB5)	1.1432	0.49053	23049.4	25085.3	1.08833	0.66605
Accessory factor UbiK family protein_x000D_ Accessory factor UbiK family protein_x000D_ Accessory factor UbiK family protein_x000D_ Accessory factor UbiK family protein_x000D_ Accessory factor UbiK family protein	tr|A0A1H8WQP2|A0A1H8WQP2_9BRAD / tr|Q131Z5|Q131Z5_RHOPS / tr|Q2ISF6|Q2ISF6_RHOP2 / tr|A0A0N1LTD0|A0A0N1LTD0_9BRAD / tr|A0A418UWS9|A0A418UWS9_RHOPL	A0A1H8WQP2 / Q131Z5 / Q2ISF6 / A0A0N1LTD0 / A0A418UWS9	Rhodopseudomonas pseudopalustris / Rhodopseudomonas palustris (strain BisB5) / Rhodopseudomonas palustris (strain HaA2) / Rhodopseudomonas sp. AAP120 / Rhodopseudomonas palustris	2.638	0.0192247	55592.4	140102	2.52016	0.000644711
Phenylalanine--tRNA ligase beta subunit (EC 6.1.1.20) (Phenylalanyl-tRNA synthetase beta subunit) (PheRS)	tr|A0A1H8MHG8|A0A1H8MHG8_9BRAD	A0A1H8MHG8	Rhodopseudomonas pseudopalustris	0.8833	0.571629	25030.9	21829.5	0.872103	0.114053
Molybdenum cofactor synthesis domain-containing protein_x000D_ Molybdopterin binding domain_x000D_ Molybdopterin binding domain_x000D_ Molybdopterin binding protein_x000D_ Competence/damage-inducible protein A_x000D_ Molybdenum cofactor biosynthesis protein_x000D_ Molybdenum cofactor synthesis domain-containing protein_x000D_ Molybdenum cofactor biosynthesis protein	tr|A0A1H8VSE7|A0A1H8VSE7_9BRAD / tr|E6VQC3|E6VQC3_RHOPX / tr|Q138L3|Q138L3_RHOPS / tr|Q2IV49|Q2IV49_RHOP2 / tr|A0A323UIT0|A0A323UIT0_RHOPL / tr|A0A2R4GTJ4|A0A2R4GTJ4_RHOPL / tr|A0A336JN58|A0A336JN58_9BRAD / tr|A0A0N1C430|A0A0N1C430_9BRAD	A0A1H8VSE7 / E6VQC3 / Q138L3 / Q2IV49 / A0A323UIT0 / A0A2R4GTJ4 / A0A336JN58 / A0A0N1C430	Rhodopseudomonas pseudopalustris / Rhodopseudomonas palustris (strain DX-1) / Rhodopseudomonas palustris (strain BisB5) / Rhodopseudomonas palustris (strain HaA2) / Rhodopseudomonas palustris / Rhodopseudomonas palustris / Rhodopseudomonas pentothenatexigens / Rhodopseudomonas sp. AAP120	1.2158	0.394589	9319.61	11346.2	1.21746	0.105798
AMP-dependent synthetase and ligase_x000D_ Propionyl-CoA synthetase	tr|Q130Q1|Q130Q1_RHOPS / tr|A0A1H8LLJ2|A0A1H8LLJ2_9BRAD	Q130Q1 / A0A1H8LLJ2	Rhodopseudomonas palustris (strain BisB5) / Rhodopseudomonas pseudopalustris	0.7457	0.412616	26365.1	19517.5	0.740278	0.103645
Isocitrate lyase (EC 4.1.3.1) (Isocitrase) (Isocitratase) Isocitrate lyase (EC 4.1.3.1) (Isocitrase) (Isocitratase)	tr|Q131G7|Q131G7_RHOPS / tr|A0A1H8WWS1|A0A1H8WWS1_9BRAD	Q131G7 / A0A1H8WWS1	Rhodopseudomonas palustris (strain BisB5) / Rhodopseudomonas pseudopalustris	0.3813	0.0146749	74960.5	29087.5	0.388037	0.000163869
Flagellin_x000D_ Flagellin	tr|Q137Y7|Q137Y7_RHOPS / tr|A0A1H8VL57|A0A1H8VL57_9BRAD	Q137Y7 / A0A1H8VL57	Rhodopseudomonas palustris (strain BisB5) / Rhodopseudomonas pseudopalustris	0.9394	0.815872	78910.3	73354.3	0.92959	0.458556
Aspartyl/glutamyl-tRNA(Asn/Gln) amidotransferase subunit B (Asp/Glu-ADT subunit B) (EC 6.3.5.-)_x000D_ Aspartyl/glutamyl-tRNA(Asn/Gln) amidotransferase subunit B (Asp/Glu-ADT subunit B) (EC 6.3.5.-)	tr|E6VDH8|E6VDH8_RHOPX / tr|A0A2R4GW50|A0A2R4GW50_RHOPL	E6VDH8 / A0A2R4GW50	Rhodopseudomonas palustris (strain DX-1) / Rhodopseudomonas palustris	1.0831	0.706805	7431.81	8623.19	1.16031	0.278771
phosphoglucomutase (alpha-D-glucose-1,6-bisphosphate-dependent) (EC 5.4.2.2)_x000D_ phosphoglucomutase (alpha-D-glucose-1,6-bisphosphate-dependent) (EC 5.4.2.2)_x000D_ phosphoglucomutase (alpha-D-glucose-1,6-bisphosphate-dependent) (EC 5.4.2.2)	tr|E6VJP3|E6VJP3_RHOPX / tr|A0A323V0J0|A0A323V0J0_RHOPL / tr|A0A336JMT0|A0A336JMT0_9BRAD	E6VJP3 / A0A323V0J0 / A0A336JMT0	Rhodopseudomonas palustris (strain DX-1) / Rhodopseudomonas palustris / Rhodopseudomonas pentothenatexigens	0.632	0.163781	6863.76	6158.13	0.897194	0.390922
Carboxyl transferase_x000D_ Propionyl-CoA carboxylase beta chain (EC 6.4.1.3)_x000D_ Carboxyl transferase_x000D_ Methylmalonyl-CoA carboxyltransferase_x000D_ Methylmalonyl-CoA carboxyltransferase_x000D_ Methylmalonyl-CoA carboxyltransferase_x000D_ Propionyl-CoA carboxylase carboxyltransferase subunit	tr|E6VBZ9|E6VBZ9_RHOPX / tr|Q6N4Y0|Q6N4Y0_RHOPA / tr|B3QAZ5|B3QAZ5_RHOPT / tr|A0A323UH64|A0A323UH64_RHOPL / tr|A0A323UC65|A0A323UC65_RHOPL / tr|A0A2R4GXD2|A0A2R4GXD2_RHOPL / tr|A0A336JPC1|A0A336JPC1_9BRAD	E6VBZ9 / Q6N4Y0 / B3QAZ5 / A0A323UH64 / A0A323UC65 / A0A2R4GXD2 / A0A336JPC1	Rhodopseudomonas palustris (strain DX-1) / Rhodopseudomonas palustris (strain ATCC BAA-98 / CGA009) / Rhodopseudomonas palustris (strain TIE-1) / Rhodopseudomonas palustris / Rhodopseudomonas palustris / Rhodopseudomonas palustris / Rhodopseudomonas pentothenatexigens	0.6926	0.156296	28612.4	19506.4	0.681746	0.0064705
Succinate dehydrogenase iron-sulfur subunit (EC 1.3.5.1)_x000D_ Succinate dehydrogenase iron-sulfur subunit (EC 1.3.5.1)	tr|Q07UB1|Q07UB1_RHOP5 / tr|A0A0D7E3L8|A0A0D7E3L8_RHOPL	Q07UB1 / A0A0D7E3L8	Rhodopseudomonas palustris (strain BisA53) / Rhodopseudomonas palustris	1.1355	0.696316	18426.2	20696.7	1.12322	0.52572
ATP phosphoribosyltransferase regulatory subunit (EC 2.4.2.17)	tr|Q07TA6|Q07TA6_RHOP5	Q07TA6	Rhodopseudomonas palustris (strain BisA53)	0.7211	0.408428	10250.8	16281.8	1.58833	0.0237072
Amidase	tr|Q07QP0|Q07QP0_RHOP5	Q07QP0	Rhodopseudomonas palustris (strain BisA53)	1.0154	0.952115	8878.96	10910.3	1.22878	0.033217
Beta-ketoacyl-[acyl-carrier-protein] synthase III (Beta-ketoacyl-ACP synthase III) (KAS III) (EC 2.3.1.180) (3-oxoacyl-[acyl-carrier-protein] synthase 3) (3-oxoacyl-[acyl-carrier-protein] synthase III)	tr|Q07MS1|Q07MS1_RHOP5	Q07MS1	Rhodopseudomonas palustris (strain BisA53)	1.0191	0.926663	26400.8	26674.9	1.01038	0.852846
O-acetylhomoserine/O-acetylserine sulfhydrylase (EC 2.5.1.49)	tr|Q07MP4|Q07MP4_RHOP5	Q07MP4	Rhodopseudomonas palustris (strain BisA53)	1.1147	0.683354	11092	12336.8	1.11223	0.230496
Tol-Pal system protein TolB	tr|Q07HF8|Q07HF8_RHOP5	Q07HF8	Rhodopseudomonas palustris (strain BisA53)	1.0698	0.759639	9110.49	9679.17	1.06242	0.354935
O-acetylhomoserine/O-acetylserine sulfhydrylase (EC 2.5.1.49)	tr|Q07RW7|Q07RW7_RHOP5	Q07RW7	Rhodopseudomonas palustris (strain BisA53)	1.8525	0.0243611	7125.14	13147.4	1.84521	0.000343545
Ribonuclease D (RNase D) (EC 3.1.13.5)	tr|Q07LH3|Q07LH3_RHOP5	Q07LH3	Rhodopseudomonas palustris (strain BisA53)	0.8918	0.735156	3903.81	4297.44	1.10083	0.191884
propionyl-CoA carboxylase (EC 6.4.1.3)	tr|Q07L13|Q07L13_RHOP5	Q07L13	Rhodopseudomonas palustris (strain BisA53)	0.6594	0.182114	36628.1	23864.5	0.651535	0.0178847
histidine kinase (EC 2.7.13.3)_x000D_ histidine kinase (EC 2.7.13.3)_x000D_ histidine kinase (EC 2.7.13.3)_x000D_ histidine kinase (EC 2.7.13.3)_x000D_ histidine kinase (EC 2.7.13.3)_x000D_ histidine kinase (EC 2.7.13.3)_x000D_ histidine kinase (EC 2.7.13.3)	tr|Q07H12|Q07H12_RHOP5 / tr|E6VG13|E6VG13_RHOPX / tr|Q6N0K9|Q6N0K9_RHOPA / tr|B3QCC3|B3QCC3_RHOPT / tr|A0A2R4H0P3|A0A2R4H0P3_RHOPL / tr|A0A323UEI3|A0A323UEI3_RHOPL / tr|A0A336JXR2|A0A336JXR2_9BRAD	Q07H12 / E6VG13 / Q6N0K9 / B3QCC3 / A0A2R4H0P3 / A0A323UEI3 / A0A336JXR2	Rhodopseudomonas palustris (strain BisA53) / Rhodopseudomonas palustris (strain DX-1) / Rhodopseudomonas palustris (strain ATCC BAA-98 / CGA009) / Rhodopseudomonas palustris (strain TIE-1) / Rhodopseudomonas palustris / Rhodopseudomonas palustris / Rhodopseudomonas pentothenatexigens	1.3111	0.629261	2733.56	4016.6	1.46937	0.0163252
2-octaprenyl-3-methyl-6-methoxy-1,4-benzoquinol hydroxylase (EC 1.14.13.-)	tr|Q07MV0|Q07MV0_RHOP5	Q07MV0	Rhodopseudomonas palustris (strain BisA53)	2.3111	0.00925977	20157.7	45457.3	2.25509	8.70093e-05
Putative proteasome-type protease	tr|Q07P99|Q07P99_RHOP5	Q07P99	Rhodopseudomonas palustris (strain BisA53)	1.2222	0.397708	5388.6	6613.17	1.22725	0.0579508
Succinate--CoA ligase [ADP-forming] subunit alpha (EC 6.2.1.5) (Succinyl-CoA synthetase subunit alpha) (SCS-alpha)	tr|Q07UX7|Q07UX7_RHOP5	Q07UX7	Rhodopseudomonas palustris (strain BisA53)	0.9479	0.808762	52779.4	49628.9	0.940309	0.447836
Enoyl-[acyl-carrier-protein] reductase [NADH] (EC 1.3.1.9)	tr|Q07HS3|Q07HS3_RHOP5	Q07HS3	Rhodopseudomonas palustris (strain BisA53)	1.035	0.880216	46273.6	47364.9	1.02359	0.709914
O-acetylhomoserine/O-acetylserine sulfhydrylase (EC 2.5.1.49)	tr|Q07QW2|Q07QW2_RHOP5	Q07QW2	Rhodopseudomonas palustris (strain BisA53)	1.2722	0.528527	393265	522915	1.32968	0.258623
geranylgeranyl diphosphate reductase (EC 1.3.1.83) (Geranylgeranyl reductase)	tr|Q07RZ4|Q07RZ4_RHOP5	Q07RZ4	Rhodopseudomonas palustris (strain BisA53)	0.4551	0.0926761	16544.8	10898.9	0.658748	0.285525
Two component transcriptional regulator, winged helix family	tr|Q07QB2|Q07QB2_RHOP5	Q07QB2	Rhodopseudomonas palustris (strain BisA53)	1.1764	0.43746	9806.1	11339.2	1.15634	0.206865
D-3-phosphoglycerate dehydrogenase (EC 1.1.1.95)	tr|Q07IZ9|Q07IZ9_RHOP5	Q07IZ9	Rhodopseudomonas palustris (strain BisA53)	0.7881	0.384176	109771	84667.9	0.771311	0.0514729
Phenylacetate-coenzyme A ligase (EC 6.2.1.30) (Phenylacetyl-CoA ligase)	tr|Q07SZ7|Q07SZ7_RHOP5	Q07SZ7	Rhodopseudomonas palustris (strain BisA53)	0.295	0.00337712	12636.3	4248.39	0.336207	0.000373974
Outer membrane protein assembly factor BamA	tr|Q07NI5|Q07NI5_RHOP5	Q07NI5	Rhodopseudomonas palustris (strain BisA53)	0.7688	0.461811	1720.18	1258.59	0.731659	0.178937
FAD linked oxidase domain protein	tr|Q07PQ0|Q07PQ0_RHOP5	Q07PQ0	Rhodopseudomonas palustris (strain BisA53)	0.5368	0.0555173	6215.67	3256.5	0.523918	0.0170106
Delta-aminolevulinic acid dehydratase (EC 4.2.1.24)	tr|Q07M88|Q07M88_RHOP5	Q07M88	Rhodopseudomonas palustris (strain BisA53)	0.9123	0.69092	48281.4	43950.5	0.910299	0.210756
Cache, type 2	tr|Q07QN3|Q07QN3_RHOP5	Q07QN3	Rhodopseudomonas palustris (strain BisA53)	0.8826	0.708803	17310.6	16057.2	0.927596	0.700334
RNA binding S1 domain protein	tr|Q07UL0|Q07UL0_RHOP5	Q07UL0	Rhodopseudomonas palustris (strain BisA53)	0.7051	0.455143	3916.47	3064	0.782336	0.035606
Ribonuclease E (RNase E) (EC 3.1.26.12)	tr|Q07MB8|Q07MB8_RHOP5	Q07MB8	Rhodopseudomonas palustris (strain BisA53)	1.1428	0.63533	11072.5	12659.2	1.1433	0.08793
Alpha-1,4 glucan phosphorylase (EC 2.4.1.1)	tr|Q07H39|Q07H39_RHOP5	Q07H39	Rhodopseudomonas palustris (strain BisA53)	1.3614	0.168921	5381.83	6992.64	1.29931	0.00160215
DUF2147 domain-containing protein	tr|Q07RK0|Q07RK0_RHOP5	Q07RK0	Rhodopseudomonas palustris (strain BisA53)	0.5152	0.353574	11282.2	9998.65	0.88623	0.457056
Pyridoxal-5'-phosphate-dependent enzyme, beta subunit	tr|Q07N13|Q07N13_RHOP5	Q07N13	Rhodopseudomonas palustris (strain BisA53)	1.7684	0.044741	3748.71	6761.43	1.80367	0.0253041
ATP-binding protein Uup (EC 3.6.1.-)	tr|Q07P03|Q07P03_RHOP5	Q07P03	Rhodopseudomonas palustris (strain BisA53)	0.9349	0.804223	3323.37	3770.71	1.13461	0.291858
Extracellular ligand-binding receptor_x000D_ Extracellular ligand-binding receptor_x000D_ Extracellular ligand-binding receptor_x000D_ Ethanolamine utilization protein EutM	tr|Q07UR9|Q07UR9_RHOP5 / tr|Q2J327|Q2J327_RHOP2 / tr|E6VI47|E6VI47_RHOPX / tr|A0A0D7F4P2|A0A0D7F4P2_RHOPL	Q07UR9 / Q2J327 / E6VI47 / A0A0D7F4P2	Rhodopseudomonas palustris (strain BisA53) / Rhodopseudomonas palustris (strain HaA2) / Rhodopseudomonas palustris (strain DX-1) / Rhodopseudomonas palustris	1.2699	0.184638	9288.07	9351.64	1.00684	0.977131
Phenylalanine--tRNA ligase beta subunit (EC 6.1.1.20) (Phenylalanyl-tRNA synthetase beta subunit) (PheRS)	tr|Q07UD2|Q07UD2_RHOP5	Q07UD2	Rhodopseudomonas palustris (strain BisA53)	0.8762	0.544725	17709.7	15394.7	0.869283	0.0690719
Tyrosine--tRNA ligase (EC 6.1.1.1) (Tyrosyl-tRNA synthetase) (TyrRS)	tr|Q07MC5|Q07MC5_RHOP5	Q07MC5	Rhodopseudomonas palustris (strain BisA53)	1.0994	0.718146	15522.6	16674.7	1.07422	0.388949
Short-chain dehydrogenase/reductase SDR	tr|Q07HE9|Q07HE9_RHOP5	Q07HE9	Rhodopseudomonas palustris (strain BisA53)	5.2893	0.00643577	35017.9	156796	4.47759	0.000852364
Ubiquinone biosynthesis protein UbiU	tr|Q07HC5|Q07HC5_RHOP5	Q07HC5	Rhodopseudomonas palustris (strain BisA53)	0.9381	0.815898	31141.3	29490	0.946975	0.645621
Glutamine--tRNA ligase (EC 6.1.1.18) (Glutaminyl-tRNA synthetase) (GlnRS)	tr|Q07NH7|Q07NH7_RHOP5	Q07NH7	Rhodopseudomonas palustris (strain BisA53)	1.0147	0.954455	10327.7	10418.7	1.0088	0.927665
Acetyl-CoA acetyltransferase (EC 2.3.1.9)	tr|Q07VA5|Q07VA5_RHOP5	Q07VA5	Rhodopseudomonas palustris (strain BisA53)	2.4728	0.00122311	17834.9	43088.5	2.41596	0.000117863
Type I secretion outer membrane protein, TolC family	tr|Q07MZ9|Q07MZ9_RHOP5	Q07MZ9	Rhodopseudomonas palustris (strain BisA53)	0.4237	0.303968	8677.31	7215.5	0.831537	0.544523
Acetyl-CoA acetyltransferases (EC 2.3.1.16)	tr|Q07K27|Q07K27_RHOP5	Q07K27	Rhodopseudomonas palustris (strain BisA53)	1.3721	0.119982	6980.12	9527.35	1.36493	0.0134368
Adenylosuccinate lyase (ASL) (EC 4.3.2.2) (Adenylosuccinase)	tr|Q07R45|Q07R45_RHOP5	Q07R45	Rhodopseudomonas palustris (strain BisA53)	0.878	0.576877	17423.2	15189.9	0.871821	0.0616846
5-aminolevulinate synthase (EC 2.3.1.37) (5-aminolevulinic acid synthase) (Delta-ALA synthase) (Delta-aminolevulinate synthase)	tr|Q07H78|Q07H78_RHOP5	Q07H78	Rhodopseudomonas palustris (strain BisA53)	0.2084	0.00173066	62378.1	11829.8	0.189647	0.018947
Phasin	tr|Q07J96|Q07J96_RHOP5	Q07J96	Rhodopseudomonas palustris (strain BisA53)	1.6093	0.0392942	13530.4	21559.1	1.59338	0.00117369
Pyruvate kinase (EC 2.7.1.40)	tr|Q07J48|Q07J48_RHOP5	Q07J48	Rhodopseudomonas palustris (strain BisA53)	1.2417	0.366975	3689.49	4367.06	1.18365	0.0252984
Fumarate hydratase class I (EC 4.2.1.2)	tr|Q07RB4|Q07RB4_RHOP5	Q07RB4	Rhodopseudomonas palustris (strain BisA53)	0.8832	0.556455	12170.4	10788.8	0.886481	0.13036
Co-chaperonin GroES (10 kDa chaperonin) (Chaperonin-10) (Cpn10)	tr|Q07TB6|Q07TB6_RHOP5	Q07TB6	Rhodopseudomonas palustris (strain BisA53)	0.8528	0.587097	267102	224107	0.839033	0.40412
Pyruvate dehydrogenase E1 component subunit beta (EC 1.2.4.1)	tr|Q07ND2|Q07ND2_RHOP5	Q07ND2	Rhodopseudomonas palustris (strain BisA53)	0.877	0.787015	2106.23	2404.52	1.14162	0.601334
Malate dehydrogenase (Oxaloacetate-decarboxylating) (NADP(+))/Phosphate acetyltransferase (EC 1.1.1.40, EC 2.3.1.8)	tr|Q07LH6|Q07LH6_RHOP5	Q07LH6	Rhodopseudomonas palustris (strain BisA53)	1.2987	0.30543	6086.85	8062.84	1.32463	0.0917025
Beta sliding clamp	tr|Q07VS1|Q07VS1_RHOP5	Q07VS1	Rhodopseudomonas palustris (strain BisA53)	1.2138	0.369928	16260	19163.6	1.17857	0.00020613
Lysine--tRNA ligase (EC 6.1.1.6) (Lysyl-tRNA synthetase) (LysRS)	tr|Q07TP1|Q07TP1_RHOP5	Q07TP1	Rhodopseudomonas palustris (strain BisA53)	0.8932	0.625449	8067.94	8480.1	1.05109	0.233793
Transcriptional regulator, MucR family	tr|Q07QG8|Q07QG8_RHOP5	Q07QG8	Rhodopseudomonas palustris (strain BisA53)	0.966	0.88675	3738.96	3822.13	1.02224	0.77337
Acyl-CoA dehydrogenase domain protein	tr|Q07IF4|Q07IF4_RHOP5	Q07IF4	Rhodopseudomonas palustris (strain BisA53)	1.1186	0.557136	5416.49	5829.01	1.07616	0.474344
Hemerythrin HHE cation binding domain protein	tr|Q07JL6|Q07JL6_RHOP5	Q07JL6	Rhodopseudomonas palustris (strain BisA53)	0.8575	0.497578	36883.3	31705.7	0.859621	0.0825137
NADH:flavin oxidoreductase/NADH oxidase_x000D_ Morphinone reductase_x000D_ NADH:flavin oxidoreductase/NADH oxidase_x000D_ NADH:flavin oxidoreductase/NADH oxidase_x000D_ NADH:flavin oxidoreductase/NADH oxidase_x000D_ Alkene reductase_x000D_ Alkene reductase_x000D_ Alkene reductase_x000D_ N-ethylmaleimide reductase	tr|Q07RU7|Q07RU7_RHOP5 / tr|Q6N1K2|Q6N1K2_RHOPA / tr|Q2ISA9|Q2ISA9_RHOP2 / tr|B3Q822|B3Q822_RHOPT / tr|E6VCB7|E6VCB7_RHOPX / tr|A0A2R4GZM8|A0A2R4GZM8_RHOPL / tr|A0A418V3B0|A0A418V3B0_RHOPL / tr|A0A323UEU1|A0A323UEU1_RHOPL / tr|A0A336JU11|A0A336JU11_9BRAD	Q07RU7 / Q6N1K2 / Q2ISA9 / B3Q822 / E6VCB7 / A0A2R4GZM8 / A0A418V3B0 / A0A323UEU1 / A0A336JU11	Rhodopseudomonas palustris (strain BisA53) / Rhodopseudomonas palustris (strain ATCC BAA-98 / CGA009) / Rhodopseudomonas palustris (strain HaA2) / Rhodopseudomonas palustris (strain TIE-1) / Rhodopseudomonas palustris (strain DX-1) / Rhodopseudomonas palustris / Rhodopseudomonas palustris / Rhodopseudomonas palustris / Rhodopseudomonas pentothenatexigens	1.6755	0.0614682	6980.77	11073.3	1.58626	0.0592033
Mg-protoporphyrin IX chelatase (EC 6.6.1.1)	tr|Q07S26|Q07S26_RHOP5	Q07S26	Rhodopseudomonas palustris (strain BisA53)	0.9134	0.695526	48630.3	44055.1	0.905918	0.142164
S-methyl-5'-thioadenosine phosphorylase (EC 2.4.2.28) (5'-methylthioadenosine phosphorylase) (MTA phosphorylase) (MTAP)	tr|Q07GV8|Q07GV8_RHOP5	Q07GV8	Rhodopseudomonas palustris (strain BisA53)	0.9499	0.856532	21994.2	20357.9	0.925605	0.569922
Anthranilate synthase (EC 4.1.3.27)	tr|Q07I64|Q07I64_RHOP5	Q07I64	Rhodopseudomonas palustris (strain BisA53)	0.7867	0.458431	4623.42	4718.85	1.02064	0.89793
Aminotransferase (EC 2.6.1.-)	tr|Q07MF9|Q07MF9_RHOP5	Q07MF9	Rhodopseudomonas palustris (strain BisA53)	1.0548	0.817489	46073.8	48322.7	1.04881	0.300948
3-hydroxyisobutyrate dehydrogenase (EC 1.1.1.31)	tr|Q07Q61|Q07Q61_RHOP5	Q07Q61	Rhodopseudomonas palustris (strain BisA53)	1.5593	0.0475969	7948.83	12082.7	1.52006	0.0336873
nicotinate-nucleotide diphosphorylase (carboxylating) (EC 2.4.2.19) (Quinolinate phosphoribosyltransferase [decarboxylating])	tr|Q07IA8|Q07IA8_RHOP5	Q07IA8	Rhodopseudomonas palustris (strain BisA53)	1.1662	0.674659	4642.19	4849.71	1.0447	0.756603
Peptidyl-prolyl cis-trans isomerase (PPIase) (EC 5.2.1.8)	tr|Q07MY0|Q07MY0_RHOP5	Q07MY0	Rhodopseudomonas palustris (strain BisA53)	1.3434	0.45184	20844	28068.6	1.3466	0.303898
Bacterioferritin (EC 1.16.3.1)	tr|Q07PY5|Q07PY5_RHOP5	Q07PY5	Rhodopseudomonas palustris (strain BisA53)	2.8468	0.0305888	29631	76609.2	2.58544	0.00685024
O-succinylhomoserine sulfhydrylase (OSH sulfhydrylase) (OSHS sulfhydrylase) (EC 2.5.1.-)	tr|Q07GY8|Q07GY8_RHOP5	Q07GY8	Rhodopseudomonas palustris (strain BisA53)	1.1672	0.389781	20582	23312.5	1.13266	0.4164
Acyl-CoA dehydrogenase domain protein	tr|Q07TV4|Q07TV4_RHOP5	Q07TV4	Rhodopseudomonas palustris (strain BisA53)	1.8061	0.0594671	21163.6	37853.6	1.78862	0.00434513
Dihydroorotase, multifunctional complex type (EC 3.5.2.5)	tr|Q07IC1|Q07IC1_RHOP5	Q07IC1	Rhodopseudomonas palustris (strain BisA53)	1.3799	0.219586	6358.32	7885.22	1.24014	0.0135752
Nitrite/sulfite reductase, hemoprotein beta-component, ferrodoxin domain protein	tr|Q07QS1|Q07QS1_RHOP5	Q07QS1	Rhodopseudomonas palustris (strain BisA53)	0.9368	0.743655	19092.9	17863	0.935581	0.400984
Nitrogenase molybdenum-iron protein beta chain (EC 1.18.6.1) (Dinitrogenase)	tr|Q07HY3|Q07HY3_RHOP5	Q07HY3	Rhodopseudomonas palustris (strain BisA53)	1.2719	0.521972	4325.17	4604.6	1.06461	0.839662
Homoserine O-acetyltransferase (HAT) (EC 2.3.1.31) (Homoserine transacetylase) (HTA)	tr|Q07IH0|Q07IH0_RHOP5	Q07IH0	Rhodopseudomonas palustris (strain BisA53)	1.782	0.132583	559.694	782.469	1.39803	0.120948
Alcohol dehydrogenase, zinc-binding domain protein	tr|Q07VN3|Q07VN3_RHOP5	Q07VN3	Rhodopseudomonas palustris (strain BisA53)	1.2454	0.23842	2076.49	2565.72	1.2356	0.0134038
Transcription termination/antitermination protein NusG	tr|Q07KJ6|Q07KJ6_RHOP5	Q07KJ6	Rhodopseudomonas palustris (strain BisA53)	1.1617	0.502221	20687	24081	1.16407	0.132516
Phenylalanine--tRNA ligase alpha subunit (EC 6.1.1.20) (Phenylalanyl-tRNA synthetase alpha subunit) (PheRS)	tr|Q07UC9|Q07UC9_RHOP5	Q07UC9	Rhodopseudomonas palustris (strain BisA53)	0.9139	0.692636	7474.93	7023.43	0.939598	0.233786
Carbamoyl-phosphate synthase large chain (EC 6.3.5.5) (Carbamoyl-phosphate synthetase ammonia chain)	tr|Q07JJ8|Q07JJ8_RHOP5	Q07JJ8	Rhodopseudomonas palustris (strain BisA53)	0.9788	0.909984	17535.9	17630	1.00537	0.968104
Alpha-2-macroglobulin domain protein	tr|Q07N25|Q07N25_RHOP5	Q07N25	Rhodopseudomonas palustris (strain BisA53)	1.2338	0.482497	2598.49	2846.08	1.09528	0.691196
Helicase domain protein	tr|Q07VE6|Q07VE6_RHOP5	Q07VE6	Rhodopseudomonas palustris (strain BisA53)	1.0522	0.830315	21490.6	22384.4	1.04159	0.518056
L-carnitine dehydratase/bile acid-inducible protein F	tr|Q07IK3|Q07IK3_RHOP5	Q07IK3	Rhodopseudomonas palustris (strain BisA53)	0.786	0.392735	12759.8	11061.3	0.866887	0.231026
TRAP dicarboxylate transporter, DctP subunit	tr|Q07PI2|Q07PI2_RHOP5	Q07PI2	Rhodopseudomonas palustris (strain BisA53)	1.0755	0.738484	83516.5	90054.3	1.07828	0.528759
RNA polymerase sigma factor RpoD (Sigma-70)	tr|Q07SS5|Q07SS5_RHOP5	Q07SS5	Rhodopseudomonas palustris (strain BisA53)	1.0433	0.878137	10865	11430.4	1.05204	0.61868
Adenylate kinase (AK) (EC 2.7.4.3) (ATP-AMP transphosphorylase) (ATP:AMP phosphotransferase) (Adenylate monophosphate kinase)	tr|Q07KN9|Q07KN9_RHOP5	Q07KN9	Rhodopseudomonas palustris (strain BisA53)	1.0606	0.795473	100808	106056	1.05206	0.446854
Cysteine synthase (EC 2.5.1.47)	tr|Q07KI0|Q07KI0_RHOP5	Q07KI0	Rhodopseudomonas palustris (strain BisA53)	1.1839	0.560715	584716	693528	1.18609	0.227237
RNA polymerase sigma factor	tr|Q07QT7|Q07QT7_RHOP5	Q07QT7	Rhodopseudomonas palustris (strain BisA53)	3.9994	0.0265658	13980.8	52701.7	3.76957	0.00717112
Enoyl-CoA hydratase (EC 4.2.1.17)	tr|Q07QY2|Q07QY2_RHOP5	Q07QY2	Rhodopseudomonas palustris (strain BisA53)	2.7053	0.00697323	3254.16	8190.28	2.51686	0.00287293
Acyl-CoA dehydrogenase domain protein	tr|Q07K29|Q07K29_RHOP5	Q07K29	Rhodopseudomonas palustris (strain BisA53)	1.1162	0.617086	11411.4	12536.9	1.09863	0.128238
DUF1476 domain-containing protein	tr|Q07R79|Q07R79_RHOP5	Q07R79	Rhodopseudomonas palustris (strain BisA53)	1.4817	0.0509003	87411.7	129067	1.47655	0.000805067
Periplasmic serine endoprotease DegP-like (EC 3.4.21.107)	tr|Q07QA1|Q07QA1_RHOP5	Q07QA1	Rhodopseudomonas palustris (strain BisA53)	4.7891	0.00334333	9669.55	52872.3	5.46792	0.0141842
SCP2 domain-containing protein_x000D_ SCP2 domain-containing protein	tr|Q07HC4|Q07HC4_RHOP5 / tr|Q20X34|Q20X34_RHOPB	Q07HC4 / Q20X34	Rhodopseudomonas palustris (strain BisA53) / Rhodopseudomonas palustris (strain BisB18)	1.1015	0.680768	13039.8	13695.9	1.05031	0.818737
Succinate dehydrogenase flavoprotein subunit (EC 1.3.5.1)	tr|Q07UB3|Q07UB3_RHOP5	Q07UB3	Rhodopseudomonas palustris (strain BisA53)	0.8408	0.560765	20998.9	18085.5	0.86126	0.268289
Magnesium protoporphyrin O-methyltransferase	tr|Q07RY1|Q07RY1_RHOP5	Q07RY1	Rhodopseudomonas palustris (strain BisA53)	0.3669	0.00926964	5344.96	2380.43	0.44536	0.0583807
Metalloprotease TldD	tr|Q07HB8|Q07HB8_RHOP5	Q07HB8	Rhodopseudomonas palustris (strain BisA53)	1.6886	0.0177575	6079.88	9803.36	1.61243	0.00711694
2-oxoglutarate dehydrogenase E1 component (EC 1.2.4.2) (Alpha-ketoglutarate dehydrogenase)	tr|Q07UX8|Q07UX8_RHOP5	Q07UX8	Rhodopseudomonas palustris (strain BisA53)	1.1696	0.443187	10369.3	12044.9	1.16159	0.00950938
Oligoendopeptidase, pepF/M3 family	tr|Q07J56|Q07J56_RHOP5	Q07J56	Rhodopseudomonas palustris (strain BisA53)	0.8957	0.705623	12251	11506.8	0.939253	0.557979
ParA family protein_x000D_ CobQ/CobB/MinD/ParA nucleotide binding domain-containing protein_x000D_ CobQ/CobB/MinD/ParA nucleotide binding domain-containing protein_x000D_ CobQ/CobB/MinD/ParA nucleotide binding domain-containing protein_x000D_ CobQ/CobB/MinD/ParA nucleotide binding domain-containing protein_x000D_ CobQ/CobB/MinD/ParA nucleotide binding domain-containing protein_x000D_ CobQ/CobB/Mi…	tr|Q07I72|Q07I72_RHOP5 / tr|Q6N1B2|Q6N1B2_RHOPA / tr|B3Q9Z8|B3Q9Z8_RHOPT / tr|E6VD60|E6VD60_RHOPX / tr|A0A323UBR3|A0A323UBR3_RHOPL / tr|A0A2R4H051|A0A2R4H051_RHOPL / tr|A0A336JQQ8|A0A336JQQ8_9BRAD	Q07I72 / Q6N1B2 / B3Q9Z8 / E6VD60 / A0A323UBR3 / A0A2R4H051 / A0A336JQQ8	Rhodopseudomonas palustris (strain BisA53) / Rhodopseudomonas palustris (strain ATCC BAA-98 / CGA009) / Rhodopseudomonas palustris (strain TIE-1) / Rhodopseudomonas palustris (strain DX-1) / Rhodopseudomonas palustris / Rhodopseudomonas palustris / Rhodopseudomonas pentothenatexigens	1.6531	0.0132616	9653.14	15800.3	1.63681	0.00165263
NAD(P)(+) transhydrogenase (AB-specific) (EC 1.6.1.2)	tr|Q07J60|Q07J60_RHOP5	Q07J60	Rhodopseudomonas palustris (strain BisA53)	1.0748	0.752525	258067	275874	1.069	0.448723
Pyruvate flavodoxin/ferredoxin oxidoreductase domain protein	tr|Q07TL1|Q07TL1_RHOP5	Q07TL1	Rhodopseudomonas palustris (strain BisA53)	0.7006	0.222864	75446.9	52068.1	0.690129	0.0114748
Chaperone protein ClpB	tr|Q07IH3|Q07IH3_RHOP5	Q07IH3	Rhodopseudomonas palustris (strain BisA53)	1.562	0.0552621	7139.74	10930.5	1.53094	0.00759619
Short-chain dehydrogenase/reductase SDR	tr|Q07VF5|Q07VF5_RHOP5	Q07VF5	Rhodopseudomonas palustris (strain BisA53)	1.3273	0.397715	4893.72	8173.28	1.67016	0.198872
Tryptophanase (EC 4.1.99.1)	tr|Q07MI2|Q07MI2_RHOP5	Q07MI2	Rhodopseudomonas palustris (strain BisA53)	0.7894	0.369055	14914.3	11580.4	0.776467	0.119504
Farnesyl-diphosphate synthase (EC 2.5.1.10)	tr|Q07V98|Q07V98_RHOP5	Q07V98	Rhodopseudomonas palustris (strain BisA53)	1.0478	0.80263	10624.6	10720.1	1.00899	0.905276
TRAP dicarboxylate transporter, DctP subunit	tr|Q07MM1|Q07MM1_RHOP5	Q07MM1	Rhodopseudomonas palustris (strain BisA53)	1.0955	0.718171	7886.18	8684.05	1.10117	0.377848
Transketolase (EC 2.2.1.1)	tr|Q07N63|Q07N63_RHOP5	Q07N63	Rhodopseudomonas palustris (strain BisA53)	0.8022	0.40877	35153.4	27947.1	0.795004	0.0474705
Porphobilinogen deaminase (EC 2.5.1.61) (Hydroxymethylbilane synthase) (Pre-uroporphyrinogen synthase)	tr|Q07S27|Q07S27_RHOP5	Q07S27	Rhodopseudomonas palustris (strain BisA53)	1.052	0.797117	48614.3	51028.2	1.04965	0.534135
Cationic amino acid ABC transporter, periplasmic binding protein	tr|Q07N18|Q07N18_RHOP5	Q07N18	Rhodopseudomonas palustris (strain BisA53)	1.2785	0.397052	25490.8	32092	1.25897	0.0428836
Arginine--tRNA ligase (EC 6.1.1.19) (Arginyl-tRNA synthetase) (ArgRS)	tr|Q07N56|Q07N56_RHOP5	Q07N56	Rhodopseudomonas palustris (strain BisA53)	0.9209	0.576308	4562.9	5314.94	1.16482	0.587499
Xanthine dehydrogenase, molybdenum binding subunit apoprotein (EC 1.17.1.4)	tr|Q07HU5|Q07HU5_RHOP5	Q07HU5	Rhodopseudomonas palustris (strain BisA53)	1.1616	0.579526	4473.82	5327.62	1.19084	0.162515
Acyl-CoA dehydrogenase domain protein_x000D_ Acyl-CoA dehydrogenase domain protein_x000D_ Acyl-CoA dehydrogenase_x000D_ Acyl-CoA dehydrogenase	tr|E6VEM5|E6VEM5_RHOPX / tr|B3QFI8|B3QFI8_RHOPT / tr|A0A2R4GTN1|A0A2R4GTN1_RHOPL / tr|A0A323UJQ4|A0A323UJQ4_RHOPL	E6VEM5 / B3QFI8 / A0A2R4GTN1 / A0A323UJQ4	Rhodopseudomonas palustris (strain DX-1) / Rhodopseudomonas palustris (strain TIE-1) / Rhodopseudomonas palustris / Rhodopseudomonas palustris	1.4724	0.294019	5930.33	4365.92	0.736202	0.444404
Outer membrane protein assembly factor BamA	tr|E6VGN8|E6VGN8_RHOPX	E6VGN8	Rhodopseudomonas palustris (strain DX-1)	0.766	0.399735	7136.55	5977.88	0.837643	0.138653
Flagellin_x000D_ Flagellin	tr|E6VHF3|E6VHF3_RHOPX / tr|A0A0N1LT58|A0A0N1LT58_9BRAD	E6VHF3 / A0A0N1LT58	Rhodopseudomonas palustris (strain DX-1) / Rhodopseudomonas sp. AAP120	0.9553	0.86005	71656.1	68609.3	0.95748	0.692814
D-3-phosphoglycerate dehydrogenase (EC 1.1.1.95)	tr|E6VQG6|E6VQG6_RHOPX	E6VQG6	Rhodopseudomonas palustris (strain DX-1)	0.7686	0.381653	92474	69312.9	0.74954	0.0743331
Ribulose bisphosphate carboxylase small subunit (RuBisCO small subunit)_x000D_ Ribulose bisphosphate carboxylase small subunit (RuBisCO small subunit)_x000D_ Ribulose bisphosphate carboxylase small subunit (RuBisCO small subunit)_x000D_ Ribulose bisphosphate carboxylase small subunit (RuBisCO small subunit)_x000D_ Ribulose bisphosphate carboxylase small subunit (RuBisCO small subunit)_x000D_ Ribu…	tr|E6VIT8|E6VIT8_RHOPX / tr|Q6N9I9|Q6N9I9_RHOPA / tr|Q2IT04|Q2IT04_RHOP2 / tr|B3Q7E2|B3Q7E2_RHOPT / tr|A0A0N1LQM1|A0A0N1LQM1_9BRAD / tr|A0A2R4GRI4|A0A2R4GRI4_RHOPL / tr|A0A0D7EZN8|A0A0D7EZN8_RHOPL / tr|A0A323ULP9|A0A323ULP9_RHOPL / tr|A0A336JZK0|A0A336JZK0_9BRAD	E6VIT8 / Q6N9I9 / Q2IT04 / B3Q7E2 / A0A0N1LQM1 / A0A2R4GRI4 / A0A0D7EZN8 / A0A323ULP9 / A0A336JZK0	Rhodopseudomonas palustris (strain DX-1) / Rhodopseudomonas palustris (strain ATCC BAA-98 / CGA009) / Rhodopseudomonas palustris (strain HaA2) / Rhodopseudomonas palustris (strain TIE-1) / Rhodopseudomonas sp. AAP120 / Rhodopseudomonas palustris / Rhodopseudomonas palustris / Rhodopseudomonas palustris / Rhodopseudomonas pentothenatexigens	1.3732	0.273066	2657.4	3418.59	1.28644	0.113471
O-acetylhomoserine/O-acetylserine sulfhydrylase (EC 2.5.1.47)	tr|E6VPP2|E6VPP2_RHOPX	E6VPP2	Rhodopseudomonas palustris (strain DX-1)	1.2042	0.677111	301675	358646	1.18885	0.533695
ATP synthase gamma chain (ATP synthase F1 sector gamma subunit) (F-ATPase gamma subunit)_x000D_ ATP synthase gamma chain (ATP synthase F1 sector gamma subunit) (F-ATPase gamma subunit)_x000D_ ATP synthase gamma chain (ATP synthase F1 sector gamma subunit) (F-ATPase gamma subunit)_x000D_ ATP synthase gamma chain (ATP synthase F1 sector gamma subunit) (F-ATPase gamma subunit)_x000D_ ATP synthase ga…	tr|E6VJV3|E6VJV3_RHOPX / sp|B3Q746|ATPG_RHOPT / tr|A0A2R4GMV6|A0A2R4GMV6_RHOPL / tr|A0A336JSN2|A0A336JSN2_9BRAD / tr|A0A1H8W7N5|A0A1H8W7N5_9BRAD / sp|Q2J3I3|ATPG_RHOP2 / sp|Q13DP3|ATPG_RHOPS / sp|Q6NDD1|ATPG_RHOPA	E6VJV3 / B3Q746 / A0A2R4GMV6 / A0A336JSN2 / A0A1H8W7N5 / Q2J3I3 / Q13DP3 / Q6NDD1	Rhodopseudomonas palustris (strain DX-1) / Rhodopseudomonas palustris (strain TIE-1) / Rhodopseudomonas palustris / Rhodopseudomonas pentothenatexigens / Rhodopseudomonas pseudopalustris / Rhodopseudomonas palustris (strain HaA2) / Rhodopseudomonas palustris (strain BisB5) / Rhodopseudomonas palustris (strain ATCC BAA-98 / CGA009)	1.0981	0.653919	52639.6	57047.7	1.08374	0.554215
Iron-sulfur cluster carrier protein_x000D_ Iron-sulfur cluster carrier protein_x000D_ Iron-sulfur cluster carrier protein	tr|E6VDQ6|E6VDQ6_RHOPX / tr|A0A0D7F3M2|A0A0D7F3M2_RHOPL / tr|A0A336K4B1|A0A336K4B1_9BRAD	E6VDQ6 / A0A0D7F3M2 / A0A336K4B1	Rhodopseudomonas palustris (strain DX-1) / Rhodopseudomonas palustris / Rhodopseudomonas pentothenatexigens	1.2559	0.458147	4180.96	4516.41	1.08023	0.284954
Signal recognition particle protein (Fifty-four homolog)_x000D_ Signal recognition particle protein (Fifty-four homolog)	tr|E6VJ01|E6VJ01_RHOPX / tr|Q6ND64|Q6ND64_RHOPA	E6VJ01 / Q6ND64	Rhodopseudomonas palustris (strain DX-1) / Rhodopseudomonas palustris (strain ATCC BAA-98 / CGA009)	1.0549	0.852675	7648.25	9432.14	1.23324	0.607935
Aspartate--tRNA(Asp/Asn) ligase (EC 6.1.1.23) (Aspartyl-tRNA synthetase) (AspRS) (Non-discriminating aspartyl-tRNA synthetase) (ND-AspRS)_x000D_ Aspartate--tRNA(Asp/Asn) ligase (EC 6.1.1.23) (Aspartyl-tRNA synthetase) (AspRS) (Non-discriminating aspartyl-tRNA synthetase) (ND-AspRS)_x000D_ Aspartate--tRNA(Asp/Asn) ligase (EC 6.1.1.23) (Aspartyl-tRNA synthetase) (AspRS) (Non-discriminating aspartyl…	tr|E6VEE3|E6VEE3_RHOPX / tr|A0A2R4GW22|A0A2R4GW22_RHOPL / tr|A0A336JVP5|A0A336JVP5_9BRAD	E6VEE3 / A0A2R4GW22 / A0A336JVP5	Rhodopseudomonas palustris (strain DX-1) / Rhodopseudomonas palustris / Rhodopseudomonas pentothenatexigens	0.8878	0.608385	16182.9	14182.3	0.87638	0.208209
Ubiquinone biosynthesis hydroxylase, UbiH/UbiF/VisC/COQ6 family_x000D_ Putative FAD-dependent monoxygenase_x000D_ Ubiquinone biosynthesis hydroxylase, UbiH/UbiF/VisC/COQ6 family_x000D_ UbiH/UbiF family hydroxylase_x000D_ 2-octaprenyl-6-methoxyphenyl hydroxylase_x000D_ 2-octaprenyl-3-methyl-6-methoxy-1,4-benzoquinol hydroxylase	tr|E6VJH3|E6VJH3_RHOPX / tr|Q6N6E6|Q6N6E6_RHOPA / tr|B3QIV1|B3QIV1_RHOPT / tr|A0A323UN97|A0A323UN97_RHOPL / tr|A0A2R4GV19|A0A2R4GV19_RHOPL / tr|A0A336JHD7|A0A336JHD7_9BRAD	E6VJH3 / Q6N6E6 / B3QIV1 / A0A323UN97 / A0A2R4GV19 / A0A336JHD7	Rhodopseudomonas palustris (strain DX-1) / Rhodopseudomonas palustris (strain ATCC BAA-98 / CGA009) / Rhodopseudomonas palustris (strain TIE-1) / Rhodopseudomonas palustris / Rhodopseudomonas palustris / Rhodopseudomonas pentothenatexigens	1.8642	0.0219889	23448.6	43389.9	1.85042	0.000422541
Queuine tRNA-ribosyltransferase (EC 2.4.2.29) (Guanine insertion enzyme) (tRNA-guanine transglycosylase)_x000D_ Queuine tRNA-ribosyltransferase (EC 2.4.2.29) (Guanine insertion enzyme) (tRNA-guanine transglycosylase)_x000D_ Queuine tRNA-ribosyltransferase (EC 2.4.2.29) (Guanine insertion enzyme) (tRNA-guanine transglycosylase)	tr|E6VK78|E6VK78_RHOPX / tr|A0A323UNW5|A0A323UNW5_RHOPL / tr|A0A336JU51|A0A336JU51_9BRAD	E6VK78 / A0A323UNW5 / A0A336JU51	Rhodopseudomonas palustris (strain DX-1) / Rhodopseudomonas palustris / Rhodopseudomonas pentothenatexigens	1.0092	0.980556	1966.65	2188.71	1.11291	0.614712
Sulfate ABC transporter, periplasmic sulfate-binding protein_x000D_ Thiosulfate transporter subunit_x000D_ Sulfate ABC transporter substrate-binding protein	tr|E6VPK5|E6VPK5_RHOPX / tr|A0A0N1CB26|A0A0N1CB26_9BRAD / tr|A0A418V3M5|A0A418V3M5_RHOPL	E6VPK5 / A0A0N1CB26 / A0A418V3M5	Rhodopseudomonas palustris (strain DX-1) / Rhodopseudomonas sp. AAP120 / Rhodopseudomonas palustris	0.3417	0.0873094	69975.5	32855.9	0.469534	0.0282082
Phosphoribosylformylglycinamidine cyclo-ligase (EC 6.3.3.1) (AIR synthase) (AIRS) (Phosphoribosyl-aminoimidazole synthetase)_x000D_ Phosphoribosylformylglycinamidine cyclo-ligase (EC 6.3.3.1) (AIR synthase) (AIRS) (Phosphoribosyl-aminoimidazole synthetase)_x000D_ Phosphoribosylformylglycinamidine cyclo-ligase (EC 6.3.3.1) (AIR synthase) (AIRS) (Phosphoribosyl-aminoimidazole synthetase)	tr|E6VDN3|E6VDN3_RHOPX / tr|A0A323UJE5|A0A323UJE5_RHOPL / tr|A0A336JNV8|A0A336JNV8_9BRAD	E6VDN3 / A0A323UJE5 / A0A336JNV8	Rhodopseudomonas palustris (strain DX-1) / Rhodopseudomonas palustris / Rhodopseudomonas pentothenatexigens	0.8857	0.794825	7436.83	6609.34	0.88873	0.628709
Fumarate hydratase class I (EC 4.2.1.2)	tr|E6VI89|E6VI89_RHOPX	E6VI89	Rhodopseudomonas palustris (strain DX-1)	0.8918	0.600428	15763.5	14176.8	0.899343	0.151441
Isocitrate lyase (EC 4.1.3.1) (Isocitrase) (Isocitratase)	tr|E6VCA6|E6VCA6_RHOPX	E6VCA6	Rhodopseudomonas palustris (strain DX-1)	0.407	0.0167586	105644	43463.7	0.411419	0.000298696
Protein RecA (Recombinase A)_x000D_ Protein RecA (Recombinase A)_x000D_ Protein RecA (Recombinase A)_x000D_ Protein RecA (Recombinase A)_x000D_ Protein RecA (Recombinase A)	tr|E6VIB0|E6VIB0_RHOPX / tr|B3QI72|B3QI72_RHOPT / tr|A0A0N1C857|A0A0N1C857_9BRAD / tr|A0A323UNI0|A0A323UNI0_RHOPL / tr|A0A336JQ92|A0A336JQ92_9BRAD	E6VIB0 / B3QI72 / A0A0N1C857 / A0A323UNI0 / A0A336JQ92	Rhodopseudomonas palustris (strain DX-1) / Rhodopseudomonas palustris (strain TIE-1) / Rhodopseudomonas sp. AAP120 / Rhodopseudomonas palustris / Rhodopseudomonas pentothenatexigens	0.9285	0.85258	10215.3	8722.61	0.853879	0.739502
Phospho-2-dehydro-3-deoxyheptonate aldolase (EC 2.5.1.54)_x000D_ Phospho-2-dehydro-3-deoxyheptonate aldolase (EC 2.5.1.54)_x000D_ Phospho-2-dehydro-3-deoxyheptonate aldolase (EC 2.5.1.54)_x000D_ Phospho-2-dehydro-3-deoxyheptonate aldolase (EC 2.5.1.54)_x000D_ Phospho-2-dehydro-3-deoxyheptonate aldolase (EC 2.5.1.54)	tr|E6VDP6|E6VDP6_RHOPX / tr|Q6N8C0|Q6N8C0_RHOPA / tr|B3QCR3|B3QCR3_RHOPT / tr|A0A323UJN0|A0A323UJN0_RHOPL / tr|A0A336K496|A0A336K496_9BRAD	E6VDP6 / Q6N8C0 / B3QCR3 / A0A323UJN0 / A0A336K496	Rhodopseudomonas palustris (strain DX-1) / Rhodopseudomonas palustris (strain ATCC BAA-98 / CGA009) / Rhodopseudomonas palustris (strain TIE-1) / Rhodopseudomonas palustris / Rhodopseudomonas pentothenatexigens	0.7476	0.342855	8941.48	7889.91	0.882394	0.38203
Flagellin_x000D_ Flagellin_x000D_ Flagellin_x000D_ Flagellin_x000D_ Flagellin_x000D_ Flagellin_x000D_ Flagellin	tr|E6VEN2|E6VEN2_RHOPX / tr|Q6N2W9|Q6N2W9_RHOPA / tr|B3QIZ2|B3QIZ2_RHOPT / tr|A0A2R4GYG1|A0A2R4GYG1_RHOPL / tr|A0A418UYL0|A0A418UYL0_RHOPL / tr|A0A336JPY5|A0A336JPY5_9BRAD / tr|A0A336JKZ9|A0A336JKZ9_9BRAD	E6VEN2 / Q6N2W9 / B3QIZ2 / A0A2R4GYG1 / A0A418UYL0 / A0A336JPY5 / A0A336JKZ9	Rhodopseudomonas palustris (strain DX-1) / Rhodopseudomonas palustris (strain ATCC BAA-98 / CGA009) / Rhodopseudomonas palustris (strain TIE-1) / Rhodopseudomonas palustris / Rhodopseudomonas palustris / Rhodopseudomonas pentothenatexigens / Rhodopseudomonas pentothenatexigens	0.9531	0.854977	55839.2	53494.3	0.958006	0.701598
Adenine phosphoribosyltransferase (APRT) (EC 2.4.2.7)_x000D_ Adenine phosphoribosyltransferase (APRT) (EC 2.4.2.7)_x000D_ Adenine phosphoribosyltransferase (APRT) (EC 2.4.2.7)_x000D_ Adenine phosphoribosyltransferase (APRT) (EC 2.4.2.7)_x000D_ Adenine phosphoribosyltransferase (APRT) (EC 2.4.2.7)_x000D_ Adenine phosphoribosyltransferase (APRT) (EC 2.4.2.7)_x000D_ Adenine phosphoribosyltransferase…	tr|E6VD62|E6VD62_RHOPX / tr|A0A2R4H013|A0A2R4H013_RHOPL / tr|A0A323UDL0|A0A323UDL0_RHOPL / tr|A0A336JLZ6|A0A336JLZ6_9BRAD / sp|Q2IS06|APT_RHOP2 / sp|Q6N1B4|APT_RHOPA / sp|B3QA01|APT_RHOPT	E6VD62 / A0A2R4H013 / A0A323UDL0 / A0A336JLZ6 / Q2IS06 / Q6N1B4 / B3QA01	Rhodopseudomonas palustris (strain DX-1) / Rhodopseudomonas palustris / Rhodopseudomonas palustris / Rhodopseudomonas pentothenatexigens / Rhodopseudomonas palustris (strain HaA2) / Rhodopseudomonas palustris (strain ATCC BAA-98 / CGA009) / Rhodopseudomonas palustris (strain TIE-1)	0.8821	0.60101	25664.8	22156.1	0.86329	0.226252
Protein-glutamate methylesterase/protein-glutamine glutaminase (EC 3.1.1.61) (EC 3.5.1.44)	tr|E6VHZ8|E6VHZ8_RHOPX	E6VHZ8	Rhodopseudomonas palustris (strain DX-1)	0.6268	0.0786167	10109.3	6308.19	0.624001	0.000137981
50S ribosomal protein L19_x000D_ 50S ribosomal protein L19_x000D_ 50S ribosomal protein L19_x000D_ 50S ribosomal protein L19_x000D_ 50S ribosomal protein L19_x000D_ 50S ribosomal protein L19_x000D_ 50S ribosomal protein L19_x000D_ 50S ribosomal protein L19_x000D_ 50S ribosomal protein L19_x000D_ 50S ribosomal protein L19_x000D_ 50S ribosomal protein L19_x000D_ 50S ribosomal protein L19 (RRP-L19)	tr|E6VJ05|E6VJ05_RHOPX / tr|A0A2R4GMV3|A0A2R4GMV3_RHOPL / tr|A0A323UVC3|A0A323UVC3_RHOPL / tr|A0A0D7EVY8|A0A0D7EVY8_RHOPL / tr|A0A336JV10|A0A336JV10_9BRAD / tr|A0A1H8W5R5|A0A1H8W5R5_9BRAD / sp|Q13DU5|RL19_RHOPS / sp|B3Q853|RL19_RHOPT / sp|Q21CT6|RL19_RHOPB / sp|Q2J3A0|RL19_RHOP2 / sp|Q07UU4|RL19_RHOP5 / sp|Q6ND68|RL19_RHOPA	E6VJ05 / A0A2R4GMV3 / A0A323UVC3 / A0A0D7EVY8 / A0A336JV10 / A0A1H8W5R5 / Q13DU5 / B3Q853 / Q21CT6 / Q2J3A0 / Q07UU4 / Q6ND68	Rhodopseudomonas palustris (strain DX-1) / Rhodopseudomonas palustris / Rhodopseudomonas palustris / Rhodopseudomonas palustris / Rhodopseudomonas pentothenatexigens / Rhodopseudomonas pseudopalustris / Rhodopseudomonas palustris (strain BisB5) / Rhodopseudomonas palustris (strain TIE-1) / Rhodopseudomonas palustris (strain BisB18) / Rhodopseudomonas palustris (strain HaA2) / Rhodopseudomonas pal…	0.7057	0.221106	145142	100461	0.692157	0.0212537
Signal recognition particle receptor FtsY (SRP receptor)_x000D_ Signal recognition particle receptor FtsY (SRP receptor)_x000D_ Signal recognition particle receptor FtsY (SRP receptor)_x000D_ Signal recognition particle receptor FtsY (SRP receptor)_x000D_ Signal recognition particle receptor FtsY (SRP receptor)	tr|E6VJR9|E6VJR9_RHOPX / tr|Q6NDA0|Q6NDA0_RHOPA / tr|B3Q779|B3Q779_RHOPT / tr|A0A323UES5|A0A323UES5_RHOPL / tr|A0A2R4GMV1|A0A2R4GMV1_RHOPL	E6VJR9 / Q6NDA0 / B3Q779 / A0A323UES5 / A0A2R4GMV1	Rhodopseudomonas palustris (strain DX-1) / Rhodopseudomonas palustris (strain ATCC BAA-98 / CGA009) / Rhodopseudomonas palustris (strain TIE-1) / Rhodopseudomonas palustris / Rhodopseudomonas palustris	1.022	0.923709	14405.9	14663.2	1.01786	0.759885
Ubiquinone biosynthesis O-methyltransferase (2-polyprenyl-6-hydroxyphenol methylase) (EC 2.1.1.222) (3-demethylubiquinone 3-O-methyltransferase) (EC 2.1.1.64)_x000D_ Ubiquinone biosynthesis O-methyltransferase (2-polyprenyl-6-hydroxyphenol methylase) (EC 2.1.1.222) (3-demethylubiquinone 3-O-methyltransferase) (EC 2.1.1.64)_x000D_ Ubiquinone biosynthesis O-methyltransferase (2-polyprenyl-6-hydroxy…	tr|E6VMD8|E6VMD8_RHOPX / tr|A0A2R4GNW1|A0A2R4GNW1_RHOPL / tr|A0A336JJA1|A0A336JJA1_9BRAD / sp|B3QCF3|UBIG_RHOPT / sp|Q6NC69|UBIG_RHOPA	E6VMD8 / A0A2R4GNW1 / A0A336JJA1 / B3QCF3 / Q6NC69	Rhodopseudomonas palustris (strain DX-1) / Rhodopseudomonas palustris / Rhodopseudomonas pentothenatexigens / Rhodopseudomonas palustris (strain TIE-1) / Rhodopseudomonas palustris (strain ATCC BAA-98 / CGA009)	1.1699	0.340734	13106.6	15039.8	1.1475	0.257001
50S ribosomal protein L13_x000D_ 50S ribosomal protein L13_x000D_ 50S ribosomal protein L13_x000D_ 50S ribosomal protein L13_x000D_ 50S ribosomal protein L13_x000D_ 50S ribosomal protein L13_x000D_ 50S ribosomal protein L13_x000D_ 50S ribosomal protein L13_x000D_ 50S ribosomal protein L13_x000D_ 50S ribosomal protein L13 (RRP-L13)	tr|E6VIK3|E6VIK3_RHOPX / tr|A0A0N0KIB6|A0A0N0KIB6_9BRAD / tr|A0A418V1Z8|A0A418V1Z8_RHOPL / tr|A0A2R4GV16|A0A2R4GV16_RHOPL / tr|A0A323ULR2|A0A323ULR2_RHOPL / tr|A0A336JM35|A0A336JM35_9BRAD / tr|A0A1H8T1G7|A0A1H8T1G7_9BRAD / sp|B3QKG3|RL13_RHOPT / sp|Q136Q3|RL13_RHOPS / sp|Q6N651|RL13_RHOPA	E6VIK3 / A0A0N0KIB6 / A0A418V1Z8 / A0A2R4GV16 / A0A323ULR2 / A0A336JM35 / A0A1H8T1G7 / B3QKG3 / Q136Q3 / Q6N651	Rhodopseudomonas palustris (strain DX-1) / Rhodopseudomonas sp. AAP120 / Rhodopseudomonas palustris / Rhodopseudomonas palustris / Rhodopseudomonas palustris / Rhodopseudomonas pentothenatexigens / Rhodopseudomonas pseudopalustris / Rhodopseudomonas palustris (strain TIE-1) / Rhodopseudomonas palustris (strain BisB5) / Rhodopseudomonas palustris (strain ATCC BAA-98 / CGA009)	0.9139	0.7673	3547.19	2872.34	0.80975	0.407751
30S ribosomal protein S17_x000D_ 30S ribosomal protein S17_x000D_ 30S ribosomal protein S17_x000D_ 30S ribosomal protein S17_x000D_ 30S ribosomal protein S17_x000D_ 30S ribosomal protein S17_x000D_ 30S ribosomal protein S17_x000D_ 30S ribosomal protein S17_x000D_ 30S ribosomal protein S17_x000D_ 30S ribosomal protein S17_x000D_ 30S ribosomal protein S17 (RRP-S17)_x000D_ 30S ribosomal protein S17_…	tr|E6VBW5|E6VBW5_RHOPX / sp|Q2IXQ1|RS17_RHOP2 / sp|Q07KM7|RS17_RHOP5 / sp|Q211F7|RS17_RHOPB / tr|A0A323UHA3|A0A323UHA3_RHOPL / tr|A0A418V493|A0A418V493_RHOPL / tr|A0A2R4GWJ7|A0A2R4GWJ7_RHOPL / tr|A0A336JNY1|A0A336JNY1_9BRAD / tr|A0A1H8VEM4|A0A1H8VEM4_9BRAD / tr|A0A0N0KI98|A0A0N0KI98_9BRAD / sp|Q6N4U3|RS17_RHOPA / sp|B3QBX1|RS17_RHOPT / sp|Q134T8|RS17_RHOPS	E6VBW5 / Q2IXQ1 / Q07KM7 / Q211F7 / A0A323UHA3 / A0A418V493 / A0A2R4GWJ7 / A0A336JNY1 / A0A1H8VEM4 / A0A0N0KI98 / Q6N4U3 / B3QBX1 / Q134T8	Rhodopseudomonas palustris (strain DX-1) / Rhodopseudomonas palustris (strain HaA2) / Rhodopseudomonas palustris (strain BisA53) / Rhodopseudomonas palustris (strain BisB18) / Rhodopseudomonas palustris / Rhodopseudomonas palustris / Rhodopseudomonas palustris / Rhodopseudomonas pentothenatexigens / Rhodopseudomonas pseudopalustris / Rhodopseudomonas sp. AAP120 / Rhodopseudomonas palustris (strai…	0.9432	0.803703	177912	164480	0.924505	0.465282
Homospermidine synthase (EC 2.5.1.44)_x000D_ Homospermidine synthase_x000D_ Homospermidine synthase	tr|E6VCF3|E6VCF3_RHOPX / tr|A0A323UKK2|A0A323UKK2_RHOPL / tr|A0A2R4GPN1|A0A2R4GPN1_RHOPL	E6VCF3 / A0A323UKK2 / A0A2R4GPN1	Rhodopseudomonas palustris (strain DX-1) / Rhodopseudomonas palustris / Rhodopseudomonas palustris	1.7143	0.0384361	79303.4	132244	1.66758	0.0015545
TPR repeat-containing protein_x000D_ Tetratricopeptide TPR_2_x000D_ Tetratricopeptide repeat protein	tr|E6VE97|E6VE97_RHOPX / tr|Q13BT9|Q13BT9_RHOPS / tr|A0A323UEI0|A0A323UEI0_RHOPL	E6VE97 / Q13BT9 / A0A323UEI0	Rhodopseudomonas palustris (strain DX-1) / Rhodopseudomonas palustris (strain BisB5) / Rhodopseudomonas palustris	0.5862	0.2555	6940.07	5409.14	0.779407	0.0311602
Phosphoglycerate kinase (EC 2.7.2.3)	tr|E6VD97|E6VD97_RHOPX	E6VD97	Rhodopseudomonas palustris (strain DX-1)	1.3421	0.165436	109296	142800	1.30655	0.0737994
ATP synthase subunit delta (ATP synthase F(1) sector subunit delta) (F-type ATPase subunit delta) (F-ATPase subunit delta)_x000D_ ATP synthase subunit delta (ATP synthase F(1) sector subunit delta) (F-type ATPase subunit delta) (F-ATPase subunit delta)_x000D_ ATP synthase subunit delta (ATP synthase F(1) sector subunit delta) (F-type ATPase subunit delta) (F-ATPase subunit delta)_x000D_ ATP synth…	sp|Q2J3I1|ATPD_RHOP2 / tr|A0A0N1LU82|A0A0N1LU82_9BRAD / tr|A0A1H8W7X0|A0A1H8W7X0_9BRAD / tr|A0A418VDU0|A0A418VDU0_RHOPL / sp|Q13DP5|ATPD_RHOPS	Q2J3I1 / A0A0N1LU82 / A0A1H8W7X0 / A0A418VDU0 / Q13DP5	Rhodopseudomonas palustris (strain HaA2) / Rhodopseudomonas sp. AAP120 / Rhodopseudomonas pseudopalustris / Rhodopseudomonas palustris / Rhodopseudomonas palustris (strain BisB5)	1.1032	0.642154	98317.1	108215	1.10067	0.174681
Light-independent protochlorophyllide reductase subunit N (DPOR subunit N) (LI-POR subunit N) (EC 1.3.7.7)	sp|Q07RY5|BCHN_RHOP5	Q07RY5	Rhodopseudomonas palustris (strain BisA53)	0.8301	0.480913	20781.3	17382	0.836425	0.0972523
Elongation factor Tu (EF-Tu)	tr|A0A2R4GWN2|A0A2R4GWN2_RHOPL	A0A2R4GWN2	Rhodopseudomonas palustris	0.9141	0.708205	263786	238269	0.903266	0.0501141
DNA-binding protein (HU family DNA-binding protein)_x000D_ Possible DNA-binding protein hu-alpha (NS2) (HU-2)_x000D_ Histone family protein DNA-binding protein_x000D_ Histone family protein DNA-binding protein_x000D_ DNA-binding protein HU-beta	tr|A0A2R4GVR0|A0A2R4GVR0_RHOPL / tr|Q6N5M1|Q6N5M1_RHOPA / tr|B3Q7N8|B3Q7N8_RHOPT / tr|E6VFI5|E6VFI5_RHOPX / tr|A0A336JGL7|A0A336JGL7_9BRAD	A0A2R4GVR0 / Q6N5M1 / B3Q7N8 / E6VFI5 / A0A336JGL7	Rhodopseudomonas palustris / Rhodopseudomonas palustris (strain ATCC BAA-98 / CGA009) / Rhodopseudomonas palustris (strain TIE-1) / Rhodopseudomonas palustris (strain DX-1) / Rhodopseudomonas pentothenatexigens	0.8903	0.561808	192358	169284	0.880044	0.188004
Tryptophan synthase beta chain (EC 4.2.1.20)_x000D_ Tryptophan synthase beta chain (EC 4.2.1.20)_x000D_ Tryptophan synthase beta chain (EC 4.2.1.20)_x000D_ Tryptophan synthase beta chain (EC 4.2.1.20)	sp|B3Q605|TRPB_RHOPT / tr|A0A2R4GMH6|A0A2R4GMH6_RHOPL / tr|A0A336JJ85|A0A336JJ85_9BRAD / sp|Q6NDN6|TRPB_RHOPA	B3Q605 / A0A2R4GMH6 / A0A336JJ85 / Q6NDN6	Rhodopseudomonas palustris (strain TIE-1) / Rhodopseudomonas palustris / Rhodopseudomonas pentothenatexigens / Rhodopseudomonas palustris (strain ATCC BAA-98 / CGA009)	0.8239	0.415431	15044.9	12162.2	0.808395	0.198528
dTTP/UTP pyrophosphatase (dTTPase/UTPase) (EC 3.6.1.9) (Nucleoside triphosphate pyrophosphatase) (Nucleotide pyrophosphatase) (Nucleotide PPase)_x000D_ dTTP/UTP pyrophosphatase (dTTPase/UTPase) (EC 3.6.1.9) (Nucleoside triphosphate pyrophosphatase) (Nucleotide pyrophosphatase) (Nucleotide PPase)_x000D_ dTTP/UTP pyrophosphatase (dTTPase/UTPase) (EC 3.6.1.9) (Nucleoside triphosphate pyrophosphatase…	sp|Q2IRX7|NTPPA_RHOP2 / tr|A0A1H8LS04|A0A1H8LS04_9BRAD / tr|A0A0D7F3C1|A0A0D7F3C1_RHOPL / sp|Q130J6|NTPPA_RHOPS	Q2IRX7 / A0A1H8LS04 / A0A0D7F3C1 / Q130J6	Rhodopseudomonas palustris (strain HaA2) / Rhodopseudomonas pseudopalustris / Rhodopseudomonas palustris / Rhodopseudomonas palustris (strain BisB5)	1.075	0.750087	6414.16	6859.39	1.06941	0.516846
Phosphoenolpyruvate carboxykinase (ATP) (PCK) (PEP carboxykinase) (PEPCK) (EC 4.1.1.49)_x000D_ Phosphoenolpyruvate carboxykinase (ATP) (PCK) (PEP carboxykinase) (PEPCK) (EC 4.1.1.49)	sp|Q13E86|PCKA_RHOPS / tr|A0A1H8X453|A0A1H8X453_9BRAD	Q13E86 / A0A1H8X453	Rhodopseudomonas palustris (strain BisB5) / Rhodopseudomonas pseudopalustris	0.7492	0.211307	104328	77866.8	0.746364	0.000463637
NADPH-dependent 7-cyano-7-deazaguanine reductase (EC 1.7.1.13) (7-cyano-7-carbaguanine reductase) (NADPH-dependent nitrile oxidoreductase) (PreQ(0) reductase)_x000D_ NADPH-dependent 7-cyano-7-deazaguanine reductase (EC 1.7.1.13) (7-cyano-7-carbaguanine reductase) (NADPH-dependent nitrile oxidoreductase) (PreQ(0) reductase)_x000D_ NADPH-dependent 7-cyano-7-deazaguanine reductase (EC 1.7.1.13) (7-c…	sp|Q215A3|QUEF_RHOPB / sp|B3Q6L1|QUEF_RHOPT / tr|E6VHM0|E6VHM0_RHOPX / tr|A0A0N1LSQ0|A0A0N1LSQ0_9BRAD / tr|A0A2R4GVD9|A0A2R4GVD9_RHOPL / tr|A0A323UIY1|A0A323UIY1_RHOPL / tr|A0A336JGX7|A0A336JGX7_9BRAD / tr|A0A418V2T2|A0A418V2T2_RHOPL / tr|A0A1H8T9B6|A0A1H8T9B6_9BRAD / sp|Q07NE0|QUEF_RHOP5 / sp|Q2IWC9|QUEF_RHOP2 / sp|Q6N5U5|QUEF_RHOPA / sp|Q136E4|QUEF_RHOPS	Q215A3 / B3Q6L1 / E6VHM0 / A0A0N1LSQ0 / A0A2R4GVD9 / A0A323UIY1 / A0A336JGX7 / A0A418V2T2 / A0A1H8T9B6 / Q07NE0 / Q2IWC9 / Q6N5U5 / Q136E4	Rhodopseudomonas palustris (strain BisB18) / Rhodopseudomonas palustris (strain TIE-1) / Rhodopseudomonas palustris (strain DX-1) / Rhodopseudomonas sp. AAP120 / Rhodopseudomonas palustris / Rhodopseudomonas palustris / Rhodopseudomonas pentothenatexigens / Rhodopseudomonas palustris / Rhodopseudomonas pseudopalustris / Rhodopseudomonas palustris (strain BisA53) / Rhodopseudomonas palustris (stra…	0.6654	0.415662	12306.1	8549.71	0.694756	0.246508
Phosphomethylpyrimidine synthase (EC 4.1.99.17) (Hydroxymethylpyrimidine phosphate synthase) (HMP-P synthase) (HMP-phosphate synthase) (HMPP synthase) (Thiamine biosynthesis protein ThiC)_x000D_ Phosphomethylpyrimidine synthase (EC 4.1.99.17) (Hydroxymethylpyrimidine phosphate synthase) (HMP-P synthase) (HMP-phosphate synthase) (HMPP synthase) (Thiamine biosynthesis protein ThiC)_x000D_ Phosphome…	sp|P61427|THIC_RHOPA / tr|A0A2R4GYF1|A0A2R4GYF1_RHOPL / tr|A0A323UBM3|A0A323UBM3_RHOPL / tr|A0A336JS79|A0A336JS79_9BRAD / tr|E6VLN0|E6VLN0_RHOPX / sp|B3QFS9|THIC_RHOPT	P61427 / A0A2R4GYF1 / A0A323UBM3 / A0A336JS79 / E6VLN0 / B3QFS9	Rhodopseudomonas palustris (strain ATCC BAA-98 / CGA009) / Rhodopseudomonas palustris / Rhodopseudomonas palustris / Rhodopseudomonas pentothenatexigens / Rhodopseudomonas palustris (strain DX-1) / Rhodopseudomonas palustris (strain TIE-1)	0.3118	0.0129881	7131.97	3350.32	0.469761	0.00568457
DNA-directed RNA polymerase subunit beta (RNAP subunit beta) (EC 2.7.7.6) (RNA polymerase subunit beta) (Transcriptase subunit beta)	sp|Q211D8|RPOB_RHOPB	Q211D8	Rhodopseudomonas palustris (strain BisB18)	0.9322	0.74744	30792.3	28216.8	0.916358	0.071297
Farnesyl-diphosphate farnesyltransferase_x000D_ Phytoene synthase_x000D_ Squalene synthase HpnD_x000D_ Squalene synthase HpnD_x000D_ Farnesyl-diphosphate farnesyltransferase_x000D_ Squalene synthase HpnD (EC 2.5.1.32)_x000D_ Presqualene diphosphate synthase (PSPP synthase) (PSPPase) (EC 2.5.1.103)	tr|A0A212R8G9|A0A212R8G9_RHOAC / tr|A0A0D7EWR4|A0A0D7EWR4_RHOPL / tr|A0A2R4GXZ2|A0A2R4GXZ2_RHOPL / tr|A0A323UBD9|A0A323UBD9_RHOPL / tr|A0A336JU59|A0A336JU59_9BRAD / tr|E6VJ82|E6VJ82_RHOPX / sp|Q6N3F2|HPND_RHOPA	A0A212R8G9 / A0A0D7EWR4 / A0A2R4GXZ2 / A0A323UBD9 / A0A336JU59 / E6VJ82 / Q6N3F2	Rhodoblastus acidophilus (Rhodopseudomonas acidophila) / Rhodopseudomonas palustris / Rhodopseudomonas palustris / Rhodopseudomonas palustris / Rhodopseudomonas pentothenatexigens / Rhodopseudomonas palustris (strain DX-1) / Rhodopseudomonas palustris (strain ATCC BAA-98 / CGA009)	0.9904	0.96056	5309.49	5191.79	0.977832	0.743994
O-acetylhomoserine sulfhydrylase (EC 2.5.1.49)_x000D_ O-acetylhomoserine/O-acetylserine sulfhydrylase (EC 2.5.1.49)_x000D_ O-acetylhomoserine sulfhydrylase / O-succinylhomoserine sulfhydrylase	tr|Q6N201|Q6N201_RHOPA / tr|B3Q6S2|B3Q6S2_RHOPT / tr|A0A2R4GZB1|A0A2R4GZB1_RHOPL	Q6N201 / B3Q6S2 / A0A2R4GZB1	Rhodopseudomonas palustris (strain ATCC BAA-98 / CGA009) / Rhodopseudomonas palustris (strain TIE-1) / Rhodopseudomonas palustris	1.1704	0.731633	269112	310127	1.15241	0.616716
Nitrogenase iron protein (EC 1.18.6.1) (Nitrogenase Fe protein) (Nitrogenase component II) (Nitrogenase reductase)_x000D_ Nitrogenase iron protein (EC 1.18.6.1) (Nitrogenase Fe protein) (Nitrogenase component II) (Nitrogenase reductase)	tr|Q6N7A5|Q6N7A5_RHOPA / tr|A0A2R4GTY0|A0A2R4GTY0_RHOPL	Q6N7A5 / A0A2R4GTY0	Rhodopseudomonas palustris (strain ATCC BAA-98 / CGA009) / Rhodopseudomonas palustris	0.6361	0.390701	43756.2	29804	0.681138	0.262164
Acyl-CoA dehydrogenase (EC 1.3.99.-)	tr|Q6N7F2|Q6N7F2_RHOPA	Q6N7F2	Rhodopseudomonas palustris (strain ATCC BAA-98 / CGA009)	1.3386	0.309252	5121.33	3869.52	0.75557	0.469765
UTP--glucose-1-phosphate uridylyltransferase (EC 2.7.7.9) (UDP-glucose pyrophosphorylase)_x000D_ UTP--glucose-1-phosphate uridylyltransferase (EC 2.7.7.9) (UDP-glucose pyrophosphorylase)	tr|Q6NBE1|Q6NBE1_RHOPA / tr|B3QF78|B3QF78_RHOPT	Q6NBE1 / B3QF78	Rhodopseudomonas palustris (strain ATCC BAA-98 / CGA009) / Rhodopseudomonas palustris (strain TIE-1)	1.1802	0.514078	13569.5	15898.1	1.17161	0.0211654
Enoyl-[acyl-carrier-protein] reductase [NADH] (EC 1.3.1.9)_x000D_ Enoyl-[acyl-carrier-protein] reductase [NADH] (EC 1.3.1.9)	tr|Q6NAI6|Q6NAI6_RHOPA / tr|B3QIK8|B3QIK8_RHOPT	Q6NAI6 / B3QIK8	Rhodopseudomonas palustris (strain ATCC BAA-98 / CGA009) / Rhodopseudomonas palustris (strain TIE-1)	1.0572	0.802136	41183.5	42533.1	1.03277	0.628436
NAD(P) transhydrogenase subunit beta (EC 7.1.1.1) (Nicotinamide nucleotide transhydrogenase subunit beta)_x000D_ NAD(P) transhydrogenase subunit beta (EC 7.1.1.1) (Nicotinamide nucleotide transhydrogenase subunit beta)_x000D_ NAD(P) transhydrogenase subunit beta (EC 7.1.1.1) (Nicotinamide nucleotide transhydrogenase subunit beta)_x000D_ NAD(P) transhydrogenase subunit beta (EC 7.1.1.1) (Nicotinam…	tr|Q6N270|Q6N270_RHOPA / tr|B3QKQ4|B3QKQ4_RHOPT / tr|E6VNU6|E6VNU6_RHOPX / tr|A0A2R4GZ75|A0A2R4GZ75_RHOPL / tr|A0A323ULJ9|A0A323ULJ9_RHOPL	Q6N270 / B3QKQ4 / E6VNU6 / A0A2R4GZ75 / A0A323ULJ9	Rhodopseudomonas palustris (strain ATCC BAA-98 / CGA009) / Rhodopseudomonas palustris (strain TIE-1) / Rhodopseudomonas palustris (strain DX-1) / Rhodopseudomonas palustris / Rhodopseudomonas palustris	0.9652	0.927369	44624.7	40303.6	0.903168	0.613129
Outer membrane protein assembly factor BamA_x000D_ Outer membrane protein assembly factor BamA_x000D_ Outer membrane protein assembly factor BamA_x000D_ Outer membrane protein assembly factor BamA_x000D_ Outer membrane protein assembly factor BamA	tr|Q6N5Q8|Q6N5Q8_RHOPA / tr|B3Q7J6|B3Q7J6_RHOPT / tr|A0A323UI72|A0A323UI72_RHOPL / tr|A0A2R4GVI0|A0A2R4GVI0_RHOPL / tr|A0A336JJJ0|A0A336JJJ0_9BRAD	Q6N5Q8 / B3Q7J6 / A0A323UI72 / A0A2R4GVI0 / A0A336JJJ0	Rhodopseudomonas palustris (strain ATCC BAA-98 / CGA009) / Rhodopseudomonas palustris (strain TIE-1) / Rhodopseudomonas palustris / Rhodopseudomonas palustris / Rhodopseudomonas pentothenatexigens	0.7604	0.398665	5781.95	4753.65	0.822153	0.142484
Possible nitrogenase molybdenum-iron protein alpha chain (Nitrogenase component I) (Dinitrogenase) (EC 1.18.6.1)_x000D_ Nitrogenase (EC 1.18.6.1)	tr|Q6N795|Q6N795_RHOPA / tr|B3QG83|B3QG83_RHOPT	Q6N795 / B3QG83	Rhodopseudomonas palustris (strain ATCC BAA-98 / CGA009) / Rhodopseudomonas palustris (strain TIE-1)	0.8336	0.803093	14993.5	14718.3	0.981644	0.95816
Glutathione-dependent peroxiredoxin (EC 1.11.1.27)_x000D_ Glutathione-dependent peroxiredoxin (EC 1.11.1.27)_x000D_ Glutathione-dependent peroxiredoxin (EC 1.11.1.27)_x000D_ Glutathione-dependent peroxiredoxin (EC 1.11.1.27)	tr|Q6N1Y4|Q6N1Y4_RHOPA / tr|B3Q6T9|B3Q6T9_RHOPT / tr|A0A418VP00|A0A418VP00_RHOPL / tr|A0A323UL19|A0A323UL19_RHOPL	Q6N1Y4 / B3Q6T9 / A0A418VP00 / A0A323UL19	Rhodopseudomonas palustris (strain ATCC BAA-98 / CGA009) / Rhodopseudomonas palustris (strain TIE-1) / Rhodopseudomonas palustris / Rhodopseudomonas palustris	1.3393	0.152501	56806	74834.7	1.31737	0.0277653
Lipoprotein_x000D_ Lipoprotein, YaeC family_x000D_ Dioxygenase	tr|Q6N799|Q6N799_RHOPA / tr|B3QG79|B3QG79_RHOPT / tr|A0A2R4GTT7|A0A2R4GTT7_RHOPL	Q6N799 / B3QG79 / A0A2R4GTT7	Rhodopseudomonas palustris (strain ATCC BAA-98 / CGA009) / Rhodopseudomonas palustris (strain TIE-1) / Rhodopseudomonas palustris	1.529	0.453325	121840	205989	1.69065	0.203396
Thiamine-phosphate synthase (EC 2.5.1.3) (Thiamine-phosphate pyrophosphorylase)_x000D_ Thiamine-phosphate synthase (EC 2.5.1.3) (Thiamine-phosphate pyrophosphorylase)_x000D_ Thiamine-phosphate synthase (EC 2.5.1.3) (Thiamine-phosphate pyrophosphorylase)	tr|Q6N3W6|Q6N3W6_RHOPA / tr|A0A2R4GXH7|A0A2R4GXH7_RHOPL / tr|A0A336JS85|A0A336JS85_9BRAD	Q6N3W6 / A0A2R4GXH7 / A0A336JS85	Rhodopseudomonas palustris (strain ATCC BAA-98 / CGA009) / Rhodopseudomonas palustris / Rhodopseudomonas pentothenatexigens	0.5708	0.339451	8368.2	5053.25	0.603864	0.118568
phosphoglucomutase (alpha-D-glucose-1,6-bisphosphate-dependent) (EC 5.4.2.2)_x000D_ phosphoglucomutase (alpha-D-glucose-1,6-bisphosphate-dependent) (EC 5.4.2.2)_x000D_ phosphoglucomutase (alpha-D-glucose-1,6-bisphosphate-dependent) (EC 5.4.2.2)	tr|Q6N9Q4|Q6N9Q4_RHOPA / tr|B3Q6C2|B3Q6C2_RHOPT / tr|A0A2R4GRA7|A0A2R4GRA7_RHOPL	Q6N9Q4 / B3Q6C2 / A0A2R4GRA7	Rhodopseudomonas palustris (strain ATCC BAA-98 / CGA009) / Rhodopseudomonas palustris (strain TIE-1) / Rhodopseudomonas palustris	0.8635	0.507762	7316.83	7326.66	1.00134	0.987076
Iron-sulfur cluster carrier protein_x000D_ Iron-sulfur cluster carrier protein_x000D_ Iron-sulfur cluster carrier protein_x000D_ Iron-sulfur cluster carrier protein_x000D_ Iron-sulfur cluster carrier protein	tr|Q6N8C9|Q6N8C9_RHOPA / tr|B3QCQ3|B3QCQ3_RHOPT / tr|A0A0N1C678|A0A0N1C678_9BRAD / tr|A0A418V2C8|A0A418V2C8_RHOPL / tr|A0A2R4GSY8|A0A2R4GSY8_RHOPL	Q6N8C9 / B3QCQ3 / A0A0N1C678 / A0A418V2C8 / A0A2R4GSY8	Rhodopseudomonas palustris (strain ATCC BAA-98 / CGA009) / Rhodopseudomonas palustris (strain TIE-1) / Rhodopseudomonas sp. AAP120 / Rhodopseudomonas palustris / Rhodopseudomonas palustris	1.2645	0.439363	5435.37	5874.83	1.08085	0.255463
maltose alpha-D-glucosyltransferase (EC 5.4.99.16) (Maltose alpha-D-glucosyltransferase)_x000D_ maltose alpha-D-glucosyltransferase (EC 5.4.99.16) (Maltose alpha-D-glucosyltransferase)	tr|Q6N3Q0|Q6N3Q0_RHOPA / tr|B3QGI3|B3QGI3_RHOPT	Q6N3Q0 / B3QGI3	Rhodopseudomonas palustris (strain ATCC BAA-98 / CGA009) / Rhodopseudomonas palustris (strain TIE-1)	2.3624	0.00456015	3340.83	7191.11	2.15249	0.000346743
Chlorophyllide reductase subunit Z (EC 1.3.7.15) (Chlorin reductase subunit Z)_x000D_ Chlorophyllide reductase subunit Z (EC 1.3.7.15) (Chlorin reductase subunit Z)_x000D_ Chlorophyllide reductase subunit Z (EC 1.3.7.15) (Chlorin reductase subunit Z)	tr|Q6N9L6|Q6N9L6_RHOPA / tr|B3Q7A6|B3Q7A6_RHOPT / tr|A0A0N1C1Y8|A0A0N1C1Y8_9BRAD	Q6N9L6 / B3Q7A6 / A0A0N1C1Y8	Rhodopseudomonas palustris (strain ATCC BAA-98 / CGA009) / Rhodopseudomonas palustris (strain TIE-1) / Rhodopseudomonas sp. AAP120	0.9884	0.96984	9859.24	10095.7	1.02399	0.935068
Isocitrate lyase (EC 4.1.3.1) (Isocitrase) (Isocitratase)_x000D_ Isocitrate lyase (EC 4.1.3.1) (Isocitrase) (Isocitratase)_x000D_ Isocitrate lyase (EC 4.1.3.1) (Isocitrase) (Isocitratase)	tr|Q6N1L1|Q6N1L1_RHOPA / tr|B3Q812|B3Q812_RHOPT / tr|A0A2R4GZN0|A0A2R4GZN0_RHOPL	Q6N1L1 / B3Q812 / A0A2R4GZN0	Rhodopseudomonas palustris (strain ATCC BAA-98 / CGA009) / Rhodopseudomonas palustris (strain TIE-1) / Rhodopseudomonas palustris	0.3966	0.0216536	121674	48205.9	0.39619	0.000941327
D-3-phosphoglycerate dehydrogenase (EC 1.1.1.95)_x000D_ D-3-phosphoglycerate dehydrogenase (EC 1.1.1.95)_x000D_ D-3-phosphoglycerate dehydrogenase (EC 1.1.1.95)_x000D_ D-3-phosphoglycerate dehydrogenase (EC 1.1.1.95)	tr|Q6N1U6|Q6N1U6_RHOPA / tr|B3Q6Y0|B3Q6Y0_RHOPT / tr|A0A2R4GZE6|A0A2R4GZE6_RHOPL / tr|A0A336JS73|A0A336JS73_9BRAD	Q6N1U6 / B3Q6Y0 / A0A2R4GZE6 / A0A336JS73	Rhodopseudomonas palustris (strain ATCC BAA-98 / CGA009) / Rhodopseudomonas palustris (strain TIE-1) / Rhodopseudomonas palustris / Rhodopseudomonas pentothenatexigens	0.7609	0.374269	80265.4	59454.9	0.740729	0.0784325
Nitrogenase iron protein (EC 1.18.6.1) (Nitrogenase Fe protein) (Nitrogenase component II) (Nitrogenase reductase)_x000D_ Nitrogenase iron protein (EC 1.18.6.1) (Nitrogenase Fe protein) (Nitrogenase component II) (Nitrogenase reductase)_x000D_ Nitrogenase iron protein (EC 1.18.6.1) (Nitrogenase Fe protein) (Nitrogenase component II) (Nitrogenase reductase)	tr|Q6N6I0|Q6N6I0_RHOPA / tr|B3QIR2|B3QIR2_RHOPT / tr|A0A2R4GTW8|A0A2R4GTW8_RHOPL	Q6N6I0 / B3QIR2 / A0A2R4GTW8	Rhodopseudomonas palustris (strain ATCC BAA-98 / CGA009) / Rhodopseudomonas palustris (strain TIE-1) / Rhodopseudomonas palustris	0.6499	0.434433	37236.1	26546.6	0.712926	0.326677
Possible glutamate synthase, small subunit (EC 1.4.1.13)	tr|Q6N0P0|Q6N0P0_RHOPA	Q6N0P0	Rhodopseudomonas palustris (strain ATCC BAA-98 / CGA009)	0.7097	0.303333	42031.9	30640.6	0.728985	0.0443972
Possible substrate binding protein of ABC transporter system_x000D_ Extracellular ligand-binding receptor_x000D_ Extracellular ligand-binding receptor_x000D_ ABC transporter permease_x000D_ ABC transporter permease_x000D_ Amino acid/amide ABC transporter substrate-binding protein (HAAT family)_x000D_ Extracellular ligand-binding receptor_x000D_ Amino acid/amide ABC transporter substrate-binding p…	tr|Q6N1K8|Q6N1K8_RHOPA / tr|B3Q816|B3Q816_RHOPT / tr|Q131G4|Q131G4_RHOPS / tr|A0A2R4GZS0|A0A2R4GZS0_RHOPL / tr|A0A418V3B5|A0A418V3B5_RHOPL / tr|A0A336JUG0|A0A336JUG0_9BRAD / tr|E6VCB0|E6VCB0_RHOPX / tr|A0A1H8WX54|A0A1H8WX54_9BRAD	Q6N1K8 / B3Q816 / Q131G4 / A0A2R4GZS0 / A0A418V3B5 / A0A336JUG0 / E6VCB0 / A0A1H8WX54	Rhodopseudomonas palustris (strain ATCC BAA-98 / CGA009) / Rhodopseudomonas palustris (strain TIE-1) / Rhodopseudomonas palustris (strain BisB5) / Rhodopseudomonas palustris / Rhodopseudomonas palustris / Rhodopseudomonas pentothenatexigens / Rhodopseudomonas palustris (strain DX-1) / Rhodopseudomonas pseudopalustris	1.251	0.285268	4328.69	5099.5	1.17807	0.456959
Probable acetyl-CoA synthetase (EC 6.2.1.1)_x000D_ AMP-dependent synthetase and ligase	tr|Q6N494|Q6N494_RHOPA / tr|B3QES6|B3QES6_RHOPT	Q6N494 / B3QES6	Rhodopseudomonas palustris (strain ATCC BAA-98 / CGA009) / Rhodopseudomonas palustris (strain TIE-1)	1.0105	0.971389	5774	6069.96	1.05126	0.686103
Putative cystathionine beta-synthase (EC 4.2.1.22)_x000D_ Pyridoxal-5'-phosphate-dependent protein beta subunit	tr|Q6N7A2|Q6N7A2_RHOPA / tr|B3QG76|B3QG76_RHOPT	Q6N7A2 / B3QG76	Rhodopseudomonas palustris (strain ATCC BAA-98 / CGA009) / Rhodopseudomonas palustris (strain TIE-1)	0.3732	0.0354205	23375.6	9995.22	0.427593	0.00152265
Glutamine--tRNA ligase (EC 6.1.1.18) (Glutaminyl-tRNA synthetase) (GlnRS)_x000D_ Glutamine--tRNA ligase (EC 6.1.1.18) (Glutaminyl-tRNA synthetase) (GlnRS)	tr|Q6N5R6|Q6N5R6_RHOPA / tr|E6VGP6|E6VGP6_RHOPX	Q6N5R6 / E6VGP6	Rhodopseudomonas palustris (strain ATCC BAA-98 / CGA009) / Rhodopseudomonas palustris (strain DX-1)	1.029	0.893954	9465.02	9606.19	1.01492	0.81878
Carbamoyl-phosphate synthase large chain (EC 6.3.5.5) (Carbamoyl-phosphate synthetase ammonia chain)_x000D_ Carbamoyl-phosphate synthase large chain (EC 6.3.5.5) (Carbamoyl-phosphate synthetase ammonia chain)	tr|Q6N2H9|Q6N2H9_RHOPA / tr|B3QJZ0|B3QJZ0_RHOPT	Q6N2H9 / B3QJZ0	Rhodopseudomonas palustris (strain ATCC BAA-98 / CGA009) / Rhodopseudomonas palustris (strain TIE-1)	0.9601	0.832661	18476.9	18472.8	0.999774	0.998746
Putative malonic semialdehyde oxidative decarboxylase_x000D_ Methylmalonate-semialdehyde dehydrogenase_x000D_ Methylmalonate-semialdehyde dehydrogenase (Acylating)	tr|Q6N489|Q6N489_RHOPA / tr|B3QET2|B3QET2_RHOPT / tr|A0A2R4GX57|A0A2R4GX57_RHOPL	Q6N489 / B3QET2 / A0A2R4GX57	Rhodopseudomonas palustris (strain ATCC BAA-98 / CGA009) / Rhodopseudomonas palustris (strain TIE-1) / Rhodopseudomonas palustris	1.315	0.161746	33120.6	43028.7	1.29915	0.00172722
Electron transfer flavoprotein beta chain, (ETFSS)_x000D_ Electron transfer flavoprotein beta-subunit_x000D_ Electron transfer flavoprotein subunit beta_x000D_ Electron transfer flavoprotein beta subunit_x000D_ Electron transfer flavoprotein subunit beta/FixA family protein	tr|Q6N0L2|Q6N0L2_RHOPA / tr|Q13CM1|Q13CM1_RHOPS / tr|A0A0N1CCI9|A0A0N1CCI9_9BRAD / tr|A0A1H8TR88|A0A1H8TR88_9BRAD / tr|A0A418V320|A0A418V320_RHOPL	Q6N0L2 / Q13CM1 / A0A0N1CCI9 / A0A1H8TR88 / A0A418V320	Rhodopseudomonas palustris (strain ATCC BAA-98 / CGA009) / Rhodopseudomonas palustris (strain BisB5) / Rhodopseudomonas sp. AAP120 / Rhodopseudomonas pseudopalustris / Rhodopseudomonas palustris	1.5823	0.0743387	75262	119132	1.5829	0.00111392
Beta sliding clamp_x000D_ Beta sliding clamp_x000D_ Beta sliding clamp_x000D_ Beta sliding clamp_x000D_ Beta sliding clamp_x000D_ Beta sliding clamp	tr|Q6NDV2|Q6NDV2_RHOPA / tr|B3QK00|B3QK00_RHOPT / tr|A0A323UEG7|A0A323UEG7_RHOPL / tr|A0A2R4GMA2|A0A2R4GMA2_RHOPL / tr|A0A336JPT4|A0A336JPT4_9BRAD / tr|E6VE34|E6VE34_RHOPX	Q6NDV2 / B3QK00 / A0A323UEG7 / A0A2R4GMA2 / A0A336JPT4 / E6VE34	Rhodopseudomonas palustris (strain ATCC BAA-98 / CGA009) / Rhodopseudomonas palustris (strain TIE-1) / Rhodopseudomonas palustris / Rhodopseudomonas palustris / Rhodopseudomonas pentothenatexigens / Rhodopseudomonas palustris (strain DX-1)	1.1834	0.415256	22397.4	26334	1.17576	0.00372724
Periplasmic serine endoprotease DegP-like (EC 3.4.21.107)_x000D_ Periplasmic serine endoprotease DegP-like (EC 3.4.21.107)	tr|Q6N8H4|Q6N8H4_RHOPA / tr|E6VDU6|E6VDU6_RHOPX	Q6N8H4 / E6VDU6	Rhodopseudomonas palustris (strain ATCC BAA-98 / CGA009) / Rhodopseudomonas palustris (strain DX-1)	6.0966	0.0031345	13584.7	92878.2	6.83696	0.0162515
3-oxoacyl-acyl carrier protein synthase (EC 2.3.1.41)_x000D_ Beta-ketoacyl synthase_x000D_ Beta-ketoacyl-ACP synthase II	tr|Q6N884|Q6N884_RHOPA / tr|B3QCU7|B3QCU7_RHOPT / tr|A0A2R4GT28|A0A2R4GT28_RHOPL	Q6N884 / B3QCU7 / A0A2R4GT28	Rhodopseudomonas palustris (strain ATCC BAA-98 / CGA009) / Rhodopseudomonas palustris (strain TIE-1) / Rhodopseudomonas palustris	0.9855	0.969202	5454.71	5330.81	0.977285	0.925302
3-oxoacyl-[acyl-carrier-protein] synthase 2 (EC 2.3.1.179)_x000D_ 3-oxoacyl-[acyl-carrier-protein] synthase 2 (EC 2.3.1.179)_x000D_ 3-oxoacyl-[acyl-carrier-protein] synthase 2 (EC 2.3.1.179)_x000D_ 3-oxoacyl-[acyl-carrier-protein] synthase 2 (EC 2.3.1.179)_x000D_ 3-oxoacyl-[acyl-carrier-protein] synthase 2 (EC 2.3.1.179)	tr|Q6N5A9|Q6N5A9_RHOPA / tr|E6VDL2|E6VDL2_RHOPX / tr|B3Q9T0|B3Q9T0_RHOPT / tr|A0A323ULU3|A0A323ULU3_RHOPL / tr|A0A336JT15|A0A336JT15_9BRAD	Q6N5A9 / E6VDL2 / B3Q9T0 / A0A323ULU3 / A0A336JT15	Rhodopseudomonas palustris (strain ATCC BAA-98 / CGA009) / Rhodopseudomonas palustris (strain DX-1) / Rhodopseudomonas palustris (strain TIE-1) / Rhodopseudomonas palustris / Rhodopseudomonas pentothenatexigens	0.8221	0.546178	13951.6	11243.5	0.805894	0.240058
Nitrogenase molybdenum-iron protein beta chain (EC 1.18.6.1) (Dinitrogenase)_x000D_ Nitrogenase molybdenum-iron protein beta chain (EC 1.18.6.1) (Dinitrogenase)	tr|Q6N0Z1|Q6N0Z1_RHOPA / tr|B3QB45|B3QB45_RHOPT	Q6N0Z1 / B3QB45	Rhodopseudomonas palustris (strain ATCC BAA-98 / CGA009) / Rhodopseudomonas palustris (strain TIE-1)	1.1756	0.575741	5401.96	6562.12	1.21477	0.526028
Putative membrane protein_x000D_ SRPI protein_x000D_ Putative membrane protein	tr|Q6N9W3|Q6N9W3_RHOPA / tr|B3Q659|B3Q659_RHOPT / tr|Q134N6|Q134N6_RHOPS	Q6N9W3 / B3Q659 / Q134N6	Rhodopseudomonas palustris (strain ATCC BAA-98 / CGA009) / Rhodopseudomonas palustris (strain TIE-1) / Rhodopseudomonas palustris (strain BisB5)	1.5681	0.385812	36328.8	53629.8	1.47623	0.216732
Branched-chain-amino-acid aminotransferase (EC 2.6.1.42)_x000D_ Branched-chain-amino-acid aminotransferase (EC 2.6.1.42)	tr|Q6N1N5|Q6N1N5_RHOPA / tr|A0A323UB89|A0A323UB89_RHOPL	Q6N1N5 / A0A323UB89	Rhodopseudomonas palustris (strain ATCC BAA-98 / CGA009) / Rhodopseudomonas palustris	0.7601	0.53239	4458	4307.01	0.96613	0.884939
3-oxoadipate CoA-transferase subunit A (EC 2.8.3.6)_x000D_ 3-oxoacid CoA-transferase, A subunit (EC 2.8.3.5)_x000D_ Succinyl-CoA-3-ketoacid-CoA transferase	tr|Q6N294|Q6N294_RHOPA / tr|B3QKM9|B3QKM9_RHOPT / tr|A0A2R4GZ32|A0A2R4GZ32_RHOPL	Q6N294 / B3QKM9 / A0A2R4GZ32	Rhodopseudomonas palustris (strain ATCC BAA-98 / CGA009) / Rhodopseudomonas palustris (strain TIE-1) / Rhodopseudomonas palustris	1.1162	0.740213	5533.96	7755.55	1.40145	0.438602
HEPN_Swt1 domain-containing protein	tr|Q6N7N6|Q6N7N6_RHOPA	Q6N7N6	Rhodopseudomonas palustris (strain ATCC BAA-98 / CGA009)	0.6581	0.302332	1449.35	1586.99	1.09497	0.475141
3-oxoacyl-[acyl-carrier-protein] reductase (EC 1.1.1.100)	tr|Q6N5A7|Q6N5A7_RHOPA	Q6N5A7	Rhodopseudomonas palustris (strain ATCC BAA-98 / CGA009)	0.8685	0.620547	26368.3	22512.3	0.853761	0.227353
Inosine-5'-monophosphate dehydrogenase (IMP dehydrogenase) (IMPD) (IMPDH) (EC 1.1.1.205)_x000D_ Inosine-5'-monophosphate dehydrogenase (IMP dehydrogenase) (IMPD) (IMPDH) (EC 1.1.1.205)_x000D_ Inosine-5'-monophosphate dehydrogenase (IMP dehydrogenase) (IMPD) (IMPDH) (EC 1.1.1.205)_x000D_ Inosine-5'-monophosphate dehydrogenase (IMP dehydrogenase) (IMPD) (IMPDH) (EC 1.1.1.205)_x000D_ Inosine-5'-mono…	tr|Q6N7Q6|Q6N7Q6_RHOPA / tr|B3QFD6|B3QFD6_RHOPT / tr|A0A323UK82|A0A323UK82_RHOPL / tr|A0A2R4GTH1|A0A2R4GTH1_RHOPL / tr|A0A336JTT4|A0A336JTT4_9BRAD	Q6N7Q6 / B3QFD6 / A0A323UK82 / A0A2R4GTH1 / A0A336JTT4	Rhodopseudomonas palustris (strain ATCC BAA-98 / CGA009) / Rhodopseudomonas palustris (strain TIE-1) / Rhodopseudomonas palustris / Rhodopseudomonas palustris / Rhodopseudomonas pentothenatexigens	0.8936	0.652241	15998.1	14170.2	0.885745	0.216952
Class I SAM-dependent methyltransferase_x000D_ Class I SAM-dependent methyltransferase	tr|Q6N7B3|Q6N7B3_RHOPA / tr|B3QG65|B3QG65_RHOPT	Q6N7B3 / B3QG65	Rhodopseudomonas palustris (strain ATCC BAA-98 / CGA009) / Rhodopseudomonas palustris (strain TIE-1)	1.2098	0.751897	22090.4	24714.2	1.11878	0.763997
Possible nitrogenase iron-molybdenum cofactor biosynthesis protein NifE homolog_x000D_ Nitrogenase (EC 1.18.6.1)	tr|Q6N794|Q6N794_RHOPA / tr|B3QG84|B3QG84_RHOPT	Q6N794 / B3QG84	Rhodopseudomonas palustris (strain ATCC BAA-98 / CGA009) / Rhodopseudomonas palustris (strain TIE-1)	0.8954	0.864649	27945.6	31258.6	1.11855	0.776077
Homospermidine synthase_x000D_ Homospermidine synthase (EC 2.5.1.44)	tr|Q6NBG3|Q6NBG3_RHOPA / tr|B3QF56|B3QF56_RHOPT	Q6NBG3 / B3QF56	Rhodopseudomonas palustris (strain ATCC BAA-98 / CGA009) / Rhodopseudomonas palustris (strain TIE-1)	1.6705	0.0528189	14143	23043.2	1.6293	0.000611648
Light-independent protochlorophyllide reductase subunit B (DPOR subunit B) (LI-POR subunit B) (EC 1.3.7.7)	sp|Q219R0|BCHB_RHOPB	Q219R0	Rhodopseudomonas palustris (strain BisB18)	0.9339	0.804076	19340.6	17701.2	0.915237	0.465601
Protein-glutamate methylesterase/protein-glutamine glutaminase of group 2 operon (EC 3.1.1.61) (EC 3.5.1.44)_x000D_ Protein-glutamate methylesterase/protein-glutamine glutaminase (EC 3.1.1.61) (EC 3.5.1.44)	sp|P62644|CHEB2_RHOPA / tr|A0A323UCU6|A0A323UCU6_RHOPL	P62644 / A0A323UCU6	Rhodopseudomonas palustris (strain ATCC BAA-98 / CGA009) / Rhodopseudomonas palustris	0.609	0.0794164	9830.67	5954.09	0.605665	0.000901581
Light-independent protochlorophyllide reductase subunit N (DPOR subunit N) (LI-POR subunit N) (EC 1.3.7.7)	sp|Q2ISY6|BCHN_RHOP2	Q2ISY6	Rhodopseudomonas palustris (strain HaA2)	0.8167	0.414945	15131	12690.7	0.838727	0.0688849
Phosphoenolpyruvate carboxylase (PEPC) (PEPCase) (EC 4.1.1.31)	sp|Q07QP5|CAPP_RHOP5	Q07QP5	Rhodopseudomonas palustris (strain BisA53)	2.3239	0.0012545	4772.41	9726.33	2.03803	0.00072781
Chaperonin GroEL 1 (EC 5.6.1.7) (60 kDa chaperonin 1) (Chaperonin-60 1) (Cpn60 1)_x000D_ Chaperonin GroEL (EC 5.6.1.7) (60 kDa chaperonin) (Chaperonin-60) (Cpn60)	sp|P60364|CH601_RHOPA / tr|B3QIE7|B3QIE7_RHOPT	P60364 / B3QIE7	Rhodopseudomonas palustris (strain ATCC BAA-98 / CGA009) / Rhodopseudomonas palustris (strain TIE-1)	0.8898	0.665225	237560	209601	0.88231	0.456471
Chlorophyllide reductase iron protein subunit X (EC 1.18.6.1)	tr|Q2ISW6|Q2ISW6_RHOP2	Q2ISW6	Rhodopseudomonas palustris (strain HaA2)	0.5732	0.0336803	48148.8	27500.1	0.571148	0.00202286
Inosine-5'-monophosphate dehydrogenase (IMP dehydrogenase) (IMPD) (IMPDH) (EC 1.1.1.205)	tr|Q2IV71|Q2IV71_RHOP2	Q2IV71	Rhodopseudomonas palustris (strain HaA2)	0.9122	0.677718	16259.9	14675.1	0.902534	0.204883
Transketolase (EC 2.2.1.1)	tr|Q2J1K1|Q2J1K1_RHOP2	Q2J1K1	Rhodopseudomonas palustris (strain HaA2)	0.8446	0.470708	70838	59472.3	0.839554	0.0285397
Phospho-2-dehydro-3-deoxyheptonate aldolase (EC 2.5.1.54)_x000D_ Phospho-2-dehydro-3-deoxyheptonate aldolase (EC 2.5.1.54)_x000D_ Phospho-2-dehydro-3-deoxyheptonate aldolase (EC 2.5.1.54)_x000D_ Phospho-2-dehydro-3-deoxyheptonate aldolase (EC 2.5.1.54)_x000D_ Phospho-2-dehydro-3-deoxyheptonate aldolase (EC 2.5.1.54)	tr|Q2IUN1|Q2IUN1_RHOP2 / tr|Q139E6|Q139E6_RHOPS / tr|A0A0N1CAW7|A0A0N1CAW7_9BRAD / tr|A0A2R4GSZ6|A0A2R4GSZ6_RHOPL / tr|A0A1H8S8E2|A0A1H8S8E2_9BRAD	Q2IUN1 / Q139E6 / A0A0N1CAW7 / A0A2R4GSZ6 / A0A1H8S8E2	Rhodopseudomonas palustris (strain HaA2) / Rhodopseudomonas palustris (strain BisB5) / Rhodopseudomonas sp. AAP120 / Rhodopseudomonas palustris / Rhodopseudomonas pseudopalustris	0.6055	0.247764	4245.75	4177.58	0.983945	0.929032
Squalene/phytoene synthase_x000D_ Phytoene synthase_x000D_ Squalene synthase HpnD (EC 2.5.1.21)	tr|Q2IZC8|Q2IZC8_RHOP2 / tr|A0A0N1CD76|A0A0N1CD76_9BRAD / tr|A0A418VGZ4|A0A418VGZ4_RHOPL	Q2IZC8 / A0A0N1CD76 / A0A418VGZ4	Rhodopseudomonas palustris (strain HaA2) / Rhodopseudomonas sp. AAP120 / Rhodopseudomonas palustris	0.9904	0.96056	5309.49	5191.79	0.977832	0.743994
Tryptophanase (EC 4.1.99.1)	tr|Q2IYN6|Q2IYN6_RHOP2	Q2IYN6	Rhodopseudomonas palustris (strain HaA2)	0.8092	0.388702	10573.2	8518.96	0.805712	0.0794999
Carboxyl transferase_x000D_ Carboxyl transferase_x000D_ Propionyl-CoA carboxylase carboxyltransferase subunit	tr|Q2IXL3|Q2IXL3_RHOP2 / tr|Q134Z1|Q134Z1_RHOPS / tr|A0A1H8V912|A0A1H8V912_9BRAD	Q2IXL3 / Q134Z1 / A0A1H8V912	Rhodopseudomonas palustris (strain HaA2) / Rhodopseudomonas palustris (strain BisB5) / Rhodopseudomonas pseudopalustris	0.6922	0.164985	30342.1	20743.1	0.683641	0.00450931
Secretion protein HlyD	tr|Q2J3S7|Q2J3S7_RHOP2	Q2J3S7	Rhodopseudomonas palustris (strain HaA2)	0.9998	0.999374	3062.63	3061.42	0.999603	0.996823
Bacterioferritin (EC 1.16.3.1)	tr|Q2IYS0|Q2IYS0_RHOP2	Q2IYS0	Rhodopseudomonas palustris (strain HaA2)	3.1501	0.00780179	21719.8	66728	3.07222	0.00489616
Peptidase M3B, oligoendopeptidase-related clade 3	tr|Q2J069|Q2J069_RHOP2	Q2J069	Rhodopseudomonas palustris (strain HaA2)	0.8765	0.674857	16209	15021.6	0.926747	0.496879
Single-stranded DNA-binding protein (SSB)	tr|Q2IWJ5|Q2IWJ5_RHOP2	Q2IWJ5	Rhodopseudomonas palustris (strain HaA2)	1.0342	0.896207	42144.4	43749.6	1.03809	0.708679
Extracellular solute-binding protein, family 1_x000D_ Extracellular solute-binding protein, family 1_x000D_ Iron(III) transport system substrate-binding protein	tr|Q2J037|Q2J037_RHOP2 / tr|Q13B63|Q13B63_RHOPS / tr|A0A1H8P938|A0A1H8P938_9BRAD	Q2J037 / Q13B63 / A0A1H8P938	Rhodopseudomonas palustris (strain HaA2) / Rhodopseudomonas palustris (strain BisB5) / Rhodopseudomonas pseudopalustris	3.4819	0.0293347	3020.83	5447.26	1.80323	0.181389
Thiosulphate-binding protein	tr|Q2J0A2|Q2J0A2_RHOP2	Q2J0A2	Rhodopseudomonas palustris (strain HaA2)	0.3438	0.0875354	92018.4	43196.9	0.469438	0.0287077
RNA polymerase sigma factor RpoD (Sigma-70)_x000D_ RNA polymerase sigma factor RpoD (Sigma-70)_x000D_ RNA polymerase sigma factor RpoD (Sigma-70)_x000D_ RNA polymerase sigma factor RpoD (Sigma-70)_x000D_ RNA polymerase sigma factor RpoD (Sigma-70)	tr|Q2ISI7|Q2ISI7_RHOP2 / tr|Q131P8|Q131P8_RHOPS / tr|A0A0N1C6I5|A0A0N1C6I5_9BRAD / tr|A0A418UXF9|A0A418UXF9_RHOPL / tr|A0A1H8WUD2|A0A1H8WUD2_9BRAD	Q2ISI7 / Q131P8 / A0A0N1C6I5 / A0A418UXF9 / A0A1H8WUD2	Rhodopseudomonas palustris (strain HaA2) / Rhodopseudomonas palustris (strain BisB5) / Rhodopseudomonas sp. AAP120 / Rhodopseudomonas palustris / Rhodopseudomonas pseudopalustris	0.9863	0.958972	10808.4	10837.8	1.00272	0.98012
Sulfide dehydrogenase (Flavoprotein) (EC 1.-.-.-)	tr|Q2IRV9|Q2IRV9_RHOP2	Q2IRV9	Rhodopseudomonas palustris (strain HaA2)	1.0956	0.707847	2297.07	2389.43	1.04021	0.785344
Branched-chain-amino-acid aminotransferase (EC 2.6.1.42)_x000D_ Branched-chain-amino-acid aminotransferase (EC 2.6.1.42)	tr|Q2ISE3|Q2ISE3_RHOP2 / tr|A0A0N1C7R5|A0A0N1C7R5_9BRAD	Q2ISE3 / A0A0N1C7R5	Rhodopseudomonas palustris (strain HaA2) / Rhodopseudomonas sp. AAP120	0.5244	0.359984	1889.36	2873.48	1.52087	0.346356
RNA polymerase-binding transcription factor DksA_x000D_ RNA polymerase-binding transcription factor DksA_x000D_ RNA polymerase-binding transcription factor DksA_x000D_ RNA polymerase-binding transcription factor DksA_x000D_ RNA polymerase-binding transcription factor DksA	tr|Q2ITH4|Q2ITH4_RHOP2 / tr|Q13AH4|Q13AH4_RHOPS / tr|A0A0N1LT34|A0A0N1LT34_9BRAD / tr|A0A1H8UTU3|A0A1H8UTU3_9BRAD / tr|A0A418VKE3|A0A418VKE3_RHOPL	Q2ITH4 / Q13AH4 / A0A0N1LT34 / A0A1H8UTU3 / A0A418VKE3	Rhodopseudomonas palustris (strain HaA2) / Rhodopseudomonas palustris (strain BisB5) / Rhodopseudomonas sp. AAP120 / Rhodopseudomonas pseudopalustris / Rhodopseudomonas palustris	1.1749	0.460324	12335.1	14000.1	1.13498	0.581748
Alcohol dehydrogenase superfamily, zinc-containing_x000D_ Alcohol dehydrogenase zinc-binding domain protein_x000D_ Alcohol dehydrogenase, zinc-binding_x000D_ NADPH:quinone oxidoreductase_x000D_ NADPH:quinone oxidoreductase family protein_x000D_ NADPH, quinone oxidoreductase_x000D_ NADPH:quinone oxidoreductase family protein_x000D_ NADPH2:quinone reductase	tr|Q2J403|Q2J403_RHOP2 / tr|B3Q9E0|B3Q9E0_RHOPT / tr|Q13D94|Q13D94_RHOPS / tr|A0A0N1LSH1|A0A0N1LSH1_9BRAD / tr|A0A323UDT7|A0A323UDT7_RHOPL / tr|A0A2R4GNB4|A0A2R4GNB4_RHOPL / tr|A0A418VLN0|A0A418VLN0_RHOPL / tr|A0A1H8U4L6|A0A1H8U4L6_9BRAD	Q2J403 / B3Q9E0 / Q13D94 / A0A0N1LSH1 / A0A323UDT7 / A0A2R4GNB4 / A0A418VLN0 / A0A1H8U4L6	Rhodopseudomonas palustris (strain HaA2) / Rhodopseudomonas palustris (strain TIE-1) / Rhodopseudomonas palustris (strain BisB5) / Rhodopseudomonas sp. AAP120 / Rhodopseudomonas palustris / Rhodopseudomonas palustris / Rhodopseudomonas palustris / Rhodopseudomonas pseudopalustris	1.2193	0.272034	3051.4	3710.19	1.2159	0.0148988
Acetyl-CoA acetyltransferase (EC 2.3.1.9)	tr|Q2J2U0|Q2J2U0_RHOP2	Q2J2U0	Rhodopseudomonas palustris (strain HaA2)	2.3824	0.0011999	15552	36330.3	2.33605	0.000207747
AAA_5 ATPase	tr|Q2IYU2|Q2IYU2_RHOP2	Q2IYU2	Rhodopseudomonas palustris (strain HaA2)	1.4091	0.155088	4974.48	6911.53	1.3894	0.0594035
Heat shock protein DnaJ	tr|Q2J0U3|Q2J0U3_RHOP2	Q2J0U3	Rhodopseudomonas palustris (strain HaA2)	1.2143	0.334842	6046.31	7335.94	1.21329	0.0851977
Xanthine dehydrogenase, molybdenum binding subunit apoprotein (EC 1.17.1.4)	tr|Q2J1N7|Q2J1N7_RHOP2	Q2J1N7	Rhodopseudomonas palustris (strain HaA2)	1.0985	0.757311	4041.89	4470.65	1.10608	0.378942
Amidase_x000D_ Amidase (EC 3.5.1.4)_x000D_ Amidase (EC 3.5.1.4)_x000D_ Aspartyl-tRNA(Asn)/glutamyl-tRNA(Gln) amidotransferase subunit A	tr|Q2IU29|Q2IU29_RHOP2 / tr|A0A418VDJ0|A0A418VDJ0_RHOPL / tr|A0A0D7E5Z7|A0A0D7E5Z7_RHOPL / tr|A0A336JVY4|A0A336JVY4_9BRAD	Q2IU29 / A0A418VDJ0 / A0A0D7E5Z7 / A0A336JVY4	Rhodopseudomonas palustris (strain HaA2) / Rhodopseudomonas palustris / Rhodopseudomonas palustris / Rhodopseudomonas pentothenatexigens	1.1785	0.541527	4733.09	4629.45	0.978105	0.912522
3-oxoacyl-[acyl-carrier-protein] synthase 2 (EC 2.3.1.179)	tr|Q2IX86|Q2IX86_RHOP2	Q2IX86	Rhodopseudomonas palustris (strain HaA2)	0.7713	0.575799	22101.3	16451.1	0.744351	0.312125
Glutamine--tRNA ligase (EC 6.1.1.18) (Glutaminyl-tRNA synthetase) (GlnRS)	tr|Q2IW97|Q2IW97_RHOP2	Q2IW97	Rhodopseudomonas palustris (strain HaA2)	0.9683	0.886988	11399.8	10977.7	0.962967	0.638328
CobQ/CobB/MinD/ParA nucleotide binding domain-containing protein_x000D_ CobQ/CobB/MinD/ParA nucleotide binding domain-containing protein_x000D_ CobQ/CobB/MinD/ParA nucleotide binding domain-containing protein_x000D_ CobQ/CobB/MinD/ParA nucleotide binding domain-containing protein	tr|Q2IS08|Q2IS08_RHOP2 / tr|Q130R2|Q130R2_RHOPS / tr|A0A1H8LKR1|A0A1H8LKR1_9BRAD / tr|A0A418VLT3|A0A418VLT3_RHOPL	Q2IS08 / Q130R2 / A0A1H8LKR1 / A0A418VLT3	Rhodopseudomonas palustris (strain HaA2) / Rhodopseudomonas palustris (strain BisB5) / Rhodopseudomonas pseudopalustris / Rhodopseudomonas palustris	1.6016	0.0261856	7233.21	11457	1.58395	0.00779955
Chaperone protein ClpB_x000D_ Chaperone protein ClpB_x000D_ Chaperone protein ClpB_x000D_ Chaperone protein ClpB	tr|Q2IS75|Q2IS75_RHOP2 / tr|Q131C5|Q131C5_RHOPS / tr|A0A0N1BX18|A0A0N1BX18_9BRAD / tr|A0A1H8LBP6|A0A1H8LBP6_9BRAD	Q2IS75 / Q131C5 / A0A0N1BX18 / A0A1H8LBP6	Rhodopseudomonas palustris (strain HaA2) / Rhodopseudomonas palustris (strain BisB5) / Rhodopseudomonas sp. AAP120 / Rhodopseudomonas pseudopalustris	1.5972	0.0441382	6981.14	10903.9	1.56191	0.0078169
Pyruvate flavodoxin/ferredoxin oxidoreductase	tr|Q2J1U8|Q2J1U8_RHOP2	Q2J1U8	Rhodopseudomonas palustris (strain HaA2)	0.7106	0.213754	68126	47961.3	0.704009	0.00618719
Signal recognition particle receptor FtsY (SRP receptor)	tr|Q2J387|Q2J387_RHOP2	Q2J387	Rhodopseudomonas palustris (strain HaA2)	1.0151	0.950151	12399.5	12537.4	1.01112	0.884556
Vitamin B12-dependent ribonucleotide reductase (EC 1.17.4.1)	tr|Q2IX12|Q2IX12_RHOP2	Q2IX12	Rhodopseudomonas palustris (strain HaA2)	0.2342	0.0042388	3380.5	1083.51	0.320518	0.0452091
Homoserine dehydrogenase (EC 1.1.1.3)_x000D_ Homoserine dehydrogenase (EC 1.1.1.3)_x000D_ Homoserine dehydrogenase (EC 1.1.1.3)	tr|Q2IVU2|Q2IVU2_RHOP2 / tr|Q137L4|Q137L4_RHOPS / tr|A0A1H8W1H4|A0A1H8W1H4_9BRAD	Q2IVU2 / Q137L4 / A0A1H8W1H4	Rhodopseudomonas palustris (strain HaA2) / Rhodopseudomonas palustris (strain BisB5) / Rhodopseudomonas pseudopalustris	0.9168	0.705356	7060.94	6482.94	0.918141	0.512692
Glutamate synthase (NADH) large subunit (EC 1.4.1.14)	tr|Q2IRE6|Q2IRE6_RHOP2	Q2IRE6	Rhodopseudomonas palustris (strain HaA2)	0.8793	0.621613	11534.5	10016.9	0.868428	0.270164
LemA	tr|Q2IT11|Q2IT11_RHOP2	Q2IT11	Rhodopseudomonas palustris (strain HaA2)	1.3694	0.562212	6977.81	9602.21	1.37611	0.181004
O-acetylhomoserine/O-acetylserine sulfhydrylase (EC 2.5.1.49)	tr|Q2IWP1|Q2IWP1_RHOP2	Q2IWP1	Rhodopseudomonas palustris (strain HaA2)	1.1801	0.602183	8739.14	10296.2	1.17817	0.240269
Glutathione-dependent peroxiredoxin (EC 1.11.1.27)	tr|Q2J0F7|Q2J0F7_RHOP2	Q2J0F7	Rhodopseudomonas palustris (strain HaA2)	1.3558	0.157485	51372.9	69147	1.34598	0.00201904
Thiamine-phosphate synthase (EC 2.5.1.3) (Thiamine-phosphate pyrophosphorylase)_x000D_ Thiamine-phosphate synthase (EC 2.5.1.3) (Thiamine-phosphate pyrophosphorylase)_x000D_ Thiamine-phosphate synthase (TP synthase) (TPS) (EC 2.5.1.3) (Thiamine-phosphate pyrophosphorylase) (TMP pyrophosphorylase) (TMP-PPase)	tr|B3QFS8|B3QFS8_RHOPT / tr|E6VLN1|E6VLN1_RHOPX / tr|A0A323UPU6|A0A323UPU6_RHOPL	B3QFS8 / E6VLN1 / A0A323UPU6	Rhodopseudomonas palustris (strain TIE-1) / Rhodopseudomonas palustris (strain DX-1) / Rhodopseudomonas palustris	0.8324	0.591371	5144.67	4832.31	0.939285	0.746548
Phosphoribosylformylglycinamidine cyclo-ligase (EC 6.3.3.1) (AIR synthase) (AIRS) (Phosphoribosyl-aminoimidazole synthetase)_x000D_ Phosphoribosylformylglycinamidine cyclo-ligase (EC 6.3.3.1) (AIR synthase) (AIRS) (Phosphoribosyl-aminoimidazole synthetase)_x000D_ Phosphoribosylformylglycinamidine cyclo-ligase (EC 6.3.3.1) (AIR synthase) (AIRS) (Phosphoribosyl-aminoimidazole synthetase)	tr|B3Q9Q9|B3Q9Q9_RHOPT / tr|A0A2R4GVY3|A0A2R4GVY3_RHOPL / sp|Q6N5C8|PUR5_RHOPA	B3Q9Q9 / A0A2R4GVY3 / Q6N5C8	Rhodopseudomonas palustris (strain TIE-1) / Rhodopseudomonas palustris / Rhodopseudomonas palustris (strain ATCC BAA-98 / CGA009)	0.9676	0.93745	9040.68	8240.26	0.911465	0.721555
Signal recognition particle protein (Fifty-four homolog)	tr|B3Q857|B3Q857_RHOPT	B3Q857	Rhodopseudomonas palustris (strain TIE-1)	1.0838	0.791462	7542.64	9831.74	1.30349	0.563341
Squalene/phytoene synthase	tr|Q218A9|Q218A9_RHOPB	Q218A9	Rhodopseudomonas palustris (strain BisB18)	0.8983	0.681989	5167.29	5059.79	0.979195	0.809634
Adenosylhomocysteinase (EC 3.3.1.1) (S-adenosyl-L-homocysteine hydrolase) (AdoHcyase)	tr|Q20YV8|Q20YV8_RHOPB	Q20YV8	Rhodopseudomonas palustris (strain BisB18)	0.9318	0.785962	85017.1	78404.4	0.922219	0.31565
Periplasmic serine endoprotease DegP-like (EC 3.4.21.107)	tr|B3QBR1|B3QBR1_RHOPT	B3QBR1	Rhodopseudomonas palustris (strain BisB18)	0.4199	0.0110245	1958.83	1147.57	0.585844	0.00363126
Oxidoreductase FAD/NAD(P)-binding domain protein	tr|B3QC90|B3QC90_RHOPT	B3QC90	Rhodopseudomonas palustris (strain TIE-1)	0.7086	0.30625	41308.7	30022.7	0.726789	0.0470385
TonB-dependent receptor plug	tr|B3QDB7|B3QDB7_RHOPT	B3QDB7	Rhodopseudomonas palustris (strain TIE-1)	0.7057	0.19977	20947.7	14673.4	0.700478	0.0236248
Peptide chain release factor 2 (RF-2)_x000D_ Peptide chain release factor 2 (RF-2)	tr|B3QH51|B3QH51_RHOPT / tr|A0A323UHM2|A0A323UHM2_RHOPL	B3QH51 / A0A323UHM2	Rhodopseudomonas palustris (strain TIE-1) / Rhodopseudomonas palustris	0.9556	0.786805	7142.04	6965.75	0.975317	0.752082
Type I secretion outer membrane protein, TolC	tr|Q214R8|Q214R8_RHOPB	Q214R8	Rhodopseudomonas palustris (strain TIE-1)	5.5599	0.00170831	11975.8	75397	6.29579	0.0120026
Phenylalanine--tRNA ligase beta subunit (EC 6.1.1.20) (Phenylalanyl-tRNA synthetase beta subunit) (PheRS)_x000D_ Phenylalanine--tRNA ligase beta subunit (EC 6.1.1.20) (Phenylalanyl-tRNA synthetase beta subunit) (PheRS)	tr|B3Q5W9|B3Q5W9_RHOPT / sp|Q6NDR9|SYFB_RHOPA	B3Q5W9 / Q6NDR9	Rhodopseudomonas palustris (strain TIE-1) / Rhodopseudomonas palustris (strain ATCC BAA-98 / CGA009)	0.8987	0.621858	23248.4	20592.4	0.885752	0.18413
Glycine--tRNA ligase beta subunit (EC 6.1.1.14) (Glycyl-tRNA synthetase beta subunit) (GlyRS)	tr|B3QHM1|B3QHM1_RHOPT	B3QHM1	Rhodopseudomonas palustris (strain TIE-1)	1.0252	0.911251	10265.7	10376.8	1.01082	0.906945
Amidase	tr|B3Q9N1|B3Q9N1_RHOPT	B3Q9N1	Rhodopseudomonas palustris (strain TIE-1)	0.5991	0.338107	8589.16	11063.3	1.28806	0.167541
Threonine--tRNA ligase (EC 6.1.1.3) (Threonyl-tRNA synthetase) (ThrRS)_x000D_ Threonine--tRNA ligase (EC 6.1.1.3) (Threonyl-tRNA synthetase) (ThrRS)_x000D_ Threonine--tRNA ligase (EC 6.1.1.3) (Threonyl-tRNA synthetase) (ThrRS)_x000D_ Threonine--tRNA ligase (EC 6.1.1.3) (Threonyl-tRNA synthetase) (ThrRS)_x000D_ Threonine--tRNA ligase (EC 6.1.1.3) (Threonyl-tRNA synthetase) (ThrRS)_x000D_ Threonine…	tr|B3QE39|B3QE39_RHOPT / tr|A0A323UPF3|A0A323UPF3_RHOPL / tr|A0A2R4GX05|A0A2R4GX05_RHOPL / tr|A0A336JLH7|A0A336JLH7_9BRAD / tr|E6VNG7|E6VNG7_RHOPX / sp|Q6N4D3|SYT_RHOPA	B3QE39 / A0A323UPF3 / A0A2R4GX05 / A0A336JLH7 / E6VNG7 / Q6N4D3	Rhodopseudomonas palustris (strain TIE-1) / Rhodopseudomonas palustris / Rhodopseudomonas palustris / Rhodopseudomonas pentothenatexigens / Rhodopseudomonas palustris (strain DX-1) / Rhodopseudomonas palustris (strain ATCC BAA-98 / CGA009)	0.8003	0.331596	7229.3	5846.26	0.80869	0.0495105
Alanine--tRNA ligase (EC 6.1.1.7) (Alanyl-tRNA synthetase) (AlaRS)_x000D_ Alanine--tRNA ligase (EC 6.1.1.7) (Alanyl-tRNA synthetase) (AlaRS)	tr|B3QI68|B3QI68_RHOPT / sp|P61706|SYA_RHOPA	B3QI68 / P61706	Rhodopseudomonas palustris (strain TIE-1) / Rhodopseudomonas palustris (strain ATCC BAA-98 / CGA009)	0.9144	0.724101	14031.1	13032.8	0.928856	0.50192
2-methylcitrate dehydratase (EC 4.2.1.79)_x000D_ 2-methylcitrate dehydratase	tr|B3QGC0|B3QGC0_RHOPT / tr|A0A2R4GUQ0|A0A2R4GUQ0_RHOPL	B3QGC0 / A0A2R4GUQ0	Rhodopseudomonas palustris (strain TIE-1) / Rhodopseudomonas palustris	1.2456	0.599447	3565.61	4271.76	1.19805	0.316818
Homoserine O-acetyltransferase (HAT) (EC 2.3.1.31) (Homoserine transacetylase) (HTA)_x000D_ Homoserine O-acetyltransferase (HAT) (EC 2.3.1.31) (Homoserine transacetylase) (HTA)_x000D_ Homoserine O-acetyltransferase (HAT) (EC 2.3.1.31) (Homoserine transacetylase) (HTA)_x000D_ Homoserine O-acetyltransferase (HAT) (EC 2.3.1.31) (Homoserine transacetylase) (HTA)_x000D_ Homoserine O-acetyltransferase …	tr|B3Q8Z3|B3Q8Z3_RHOPT / tr|E6VD19|E6VD19_RHOPX / tr|A0A418UX43|A0A418UX43_RHOPL / tr|A0A2R4H0G4|A0A2R4H0G4_RHOPL / tr|A0A323UBN5|A0A323UBN5_RHOPL / tr|A0A336JQI4|A0A336JQI4_9BRAD / sp|Q2IS70|METXA_RHOP2 / sp|Q6N1G8|METXA_RHOPA	B3Q8Z3 / E6VD19 / A0A418UX43 / A0A2R4H0G4 / A0A323UBN5 / A0A336JQI4 / Q2IS70 / Q6N1G8	Rhodopseudomonas palustris (strain TIE-1) / Rhodopseudomonas palustris (strain DX-1) / Rhodopseudomonas palustris / Rhodopseudomonas palustris / Rhodopseudomonas palustris / Rhodopseudomonas pentothenatexigens / Rhodopseudomonas palustris (strain HaA2) / Rhodopseudomonas palustris (strain ATCC BAA-98 / CGA009)	1.1164	0.654151	1496.88	1594.79	1.06541	0.577336
Sulfide dehydrogenase (Flavoprotein) (EC 1.-.-.-)_x000D_ Cytochrome-dependent sulfide dehydrogenase (Flavoprotein)	tr|Q130M4|Q130M4_RHOPS / tr|A0A1H8LP00|A0A1H8LP00_9BRAD	Q130M4 / A0A1H8LP00	Rhodopseudomonas palustris (strain BisB5) / Rhodopseudomonas pseudopalustris	1.0956	0.707847	1918.33	1552.77	0.80944	0.26449
Tyrosine--tRNA ligase (EC 6.1.1.1) (Tyrosyl-tRNA synthetase) (TyrRS)_x000D_ Tyrosine--tRNA ligase (EC 6.1.1.1) (Tyrosyl-tRNA synthetase) (TyrRS)	tr|Q137Q7|Q137Q7_RHOPS / tr|A0A1H8W0A2|A0A1H8W0A2_9BRAD	Q137Q7 / A0A1H8W0A2	Rhodopseudomonas palustris (strain BisB5) / Rhodopseudomonas pseudopalustris	1.1619	0.547742	19385.2	22203.5	1.14539	0.0439637
Nitrogen regulatory protein P-II_x000D_ Nitrogen regulatory protein P-II_x000D_ Nitrogen regulatory protein P-II	tr|Q13E02|Q13E02_RHOPS / tr|A0A0D7F6V9|A0A0D7F6V9_RHOPL / tr|A0A1H8X8R2|A0A1H8X8R2_9BRAD	Q13E02 / A0A0D7F6V9 / A0A1H8X8R2	Rhodopseudomonas palustris (strain BisB5) / Rhodopseudomonas palustris / Rhodopseudomonas pseudopalustris	1.6631	0.174845	31800.3	31840.3	1.00126	0.99308
3-oxoacyl-[acyl-carrier-protein] synthase I (EC 2.3.1.41)_x000D_ 3-oxoacyl-[acyl-carrier-protein] synthase I	tr|Q13EM8|Q13EM8_RHOPS / tr|A0A1H8MLE3|A0A1H8MLE3_9BRAD	Q13EM8 / A0A1H8MLE3	Rhodopseudomonas palustris (strain BisB5) / Rhodopseudomonas pseudopalustris	1.1965	0.432503	23183.5	28093.4	1.21178	0.0182973
Malonyl CoA-acyl carrier protein transacylase (EC 2.3.1.39)_x000D_ Malonyl CoA-acyl carrier protein transacylase (EC 2.3.1.39)	tr|Q135N0|Q135N0_RHOPS / tr|A0A1H8WFE5|A0A1H8WFE5_9BRAD	Q135N0 / A0A1H8WFE5	Rhodopseudomonas palustris (strain BisB5) / Rhodopseudomonas pseudopalustris	0.9375	0.743676	31847.5	29607.1	0.929651	0.538186
Extracellular ligand-binding receptor_x000D_ Amino acid/amide ABC transporter substrate-binding protein, HAAT family	tr|Q13A78|Q13A78_RHOPS / tr|A0A1H8RQL5|A0A1H8RQL5_9BRAD	Q13A78 / A0A1H8RQL5	Rhodopseudomonas palustris (strain BisB5) / Rhodopseudomonas pseudopalustris	1.6938	0.487474	31064.7	49308.2	1.58727	0.334561
Acetyl-CoA acetyltransferase (EC 2.3.1.9)_x000D_ Acetyl-CoA acetyltransferase	tr|Q13EE5|Q13EE5_RHOPS / tr|A0A1H8MSE9|A0A1H8MSE9_9BRAD	Q13EE5 / A0A1H8MSE9	Rhodopseudomonas palustris (strain BisB5) / Rhodopseudomonas pseudopalustris	2.4026	0.00215646	18124.1	43037.7	2.37461	5.87223e-05
Flagellin_x000D_ Flagellin	tr|Q13AI2|Q13AI2_RHOPS / tr|A0A1H8UTF9|A0A1H8UTF9_9BRAD	Q13AI2 / A0A1H8UTF9	Rhodopseudomonas palustris (strain BisB5) / Rhodopseudomonas pseudopalustris	0.9408	0.813735	79471.6	74581.9	0.938472	0.528701
L-carnitine dehydratase/bile acid-inducible protein F_x000D_ Crotonobetainyl-CoA:carnitine CoA-transferase CaiB	tr|Q132S2|Q132S2_RHOPS / tr|A0A1H8R0Y3|A0A1H8R0Y3_9BRAD	Q132S2 / A0A1H8R0Y3	Rhodopseudomonas palustris (strain BisB5) / Rhodopseudomonas pseudopalustris	0.7565	0.276378	8588.44	6667.13	0.776292	0.0382127
Acyl-CoA dehydrogenase-like_x000D_ Acyl-CoA dehydrogenase	tr|Q134G4|Q134G4_RHOPS / tr|A0A1H8Q805|A0A1H8Q805_9BRAD	Q134G4 / A0A1H8Q805	Rhodopseudomonas palustris (strain BisB5) / Rhodopseudomonas pseudopalustris	1.199	0.450642	4058.61	4907.13	1.20907	0.142752
Xanthine dehydrogenase, molybdenum binding subunit apoprotein (EC 1.17.1.4)_x000D_ Xanthine dehydrogenase, molybdenum binding subunit apoprotein	tr|Q13CC8|Q13CC8_RHOPS / tr|A0A1H8NBR8|A0A1H8NBR8_9BRAD	Q13CC8 / A0A1H8NBR8	Rhodopseudomonas palustris (strain BisB5) / Rhodopseudomonas pseudopalustris	1.0906	0.777335	3650.06	3986.68	1.09222	0.45222
Glutamine--tRNA ligase (EC 6.1.1.18) (Glutaminyl-tRNA synthetase) (GlnRS)_x000D_ Glutamine--tRNA ligase (EC 6.1.1.18) (Glutaminyl-tRNA synthetase) (GlnRS)_x000D_ Glutamine--tRNA ligase (EC 6.1.1.18) (Glutaminyl-tRNA synthetase) (GlnRS)	tr|Q136C0|Q136C0_RHOPS / tr|A0A323UIZ7|A0A323UIZ7_RHOPL / tr|A0A1H8T9Y0|A0A1H8T9Y0_9BRAD	Q136C0 / A0A323UIZ7 / A0A1H8T9Y0	Rhodopseudomonas palustris (strain BisB5) / Rhodopseudomonas palustris / Rhodopseudomonas pseudopalustris	0.9746	0.909366	8678.13	8361.24	0.963484	0.647875
3-oxoacyl-[acyl-carrier-protein] synthase 2 (EC 2.3.1.179)_x000D_ 3-oxoacyl-[acyl-carrier-protein] synthase 2 (EC 2.3.1.179)_x000D_ 3-oxoacyl-[acyl-carrier-protein] synthase 2 (EC 2.3.1.179)_x000D_ 3-oxoacyl-[acyl-carrier-protein] synthase 2 (EC 2.3.1.179)_x000D_ 3-oxoacyl-[acyl-carrier-protein] synthase 2 (EC 2.3.1.179)	tr|Q135N6|Q135N6_RHOPS / tr|A0A0N1C6B6|A0A0N1C6B6_9BRAD / tr|A0A0D7F381|A0A0D7F381_RHOPL / tr|A0A2R4GW06|A0A2R4GW06_RHOPL / tr|A0A1H8WFR1|A0A1H8WFR1_9BRAD	Q135N6 / A0A0N1C6B6 / A0A0D7F381 / A0A2R4GW06 / A0A1H8WFR1	Rhodopseudomonas palustris (strain BisB5) / Rhodopseudomonas sp. AAP120 / Rhodopseudomonas palustris / Rhodopseudomonas palustris / Rhodopseudomonas pseudopalustris	0.7831	0.45727	18041.7	13852.6	0.767809	0.162645
Isoleucine--tRNA ligase (EC 6.1.1.5) (Isoleucyl-tRNA synthetase) (IleRS)_x000D_ Isoleucine--tRNA ligase (EC 6.1.1.5) (Isoleucyl-tRNA synthetase) (IleRS)	tr|Q131I2|Q131I2_RHOPS / tr|A0A1H8WWR1|A0A1H8WWR1_9BRAD	Q131I2 / A0A1H8WWR1	Rhodopseudomonas palustris (strain BisB5) / Rhodopseudomonas pseudopalustris	1.0792	0.732441	10046.9	10721.9	1.06719	0.361568
Fmu (Sun)_x000D_ 16S rRNA (Cytosine967-C5)-methyltransferase	tr|Q138I6|Q138I6_RHOPS / tr|A0A1H8VR08|A0A1H8VR08_9BRAD	Q138I6 / A0A1H8VR08	Rhodopseudomonas palustris (strain BisB5) / Rhodopseudomonas pseudopalustris	0.8836	0.476646	6555.29	5786.13	0.882666	0.255789
Amidase_x000D_ Aspartyl-tRNA(Asn)/glutamyl-tRNA(Gln) amidotransferase subunit A	tr|Q139X3|Q139X3_RHOPS / tr|A0A1H8RWJ0|A0A1H8RWJ0_9BRAD	Q139X3 / A0A1H8RWJ0	Rhodopseudomonas palustris (strain BisB5) / Rhodopseudomonas pseudopalustris	0.7379	0.399244	7936.6	9951.37	1.25386	0.108398
Phosphoribulokinase (EC 2.7.1.19)_x000D_ Phosphoribulokinase (EC 2.7.1.19)	tr|Q13CA0|Q13CA0_RHOPS / tr|A0A1H8NDY0|A0A1H8NDY0_9BRAD	Q13CA0 / A0A1H8NDY0	Rhodopseudomonas palustris (strain BisB5) / Rhodopseudomonas pseudopalustris	0.926	0.6874	21394.9	20144.7	0.941566	0.457355
Malate dehydrogenase (Oxaloacetate decarboxylating) (NADP+)., Phosphate acetyltransferase (EC 1.1.1.40, EC 2.3.1.8)_x000D_ NADP-dependent malic enzyme_x000D_ Malate dehydrogenase (Oxaloacetate-decarboxylating)(NADP+)	tr|Q135R6|Q135R6_RHOPS / tr|A0A418V275|A0A418V275_RHOPL / tr|A0A1H8WJW3|A0A1H8WJW3_9BRAD	Q135R6 / A0A418V275 / A0A1H8WJW3	Rhodopseudomonas palustris (strain BisB5) / Rhodopseudomonas palustris / Rhodopseudomonas pseudopalustris	1.2581	0.358578	6490.06	8266.52	1.27372	0.146629
Twin-arginine translocation pathway signal_x000D_ Amino acid/amide ABC transporter substrate-binding protein, HAAT family	tr|Q13A06|Q13A06_RHOPS / tr|A0A1H8RVS1|A0A1H8RVS1_9BRAD	Q13A06 / A0A1H8RVS1	Rhodopseudomonas palustris (strain BisB5) / Rhodopseudomonas pseudopalustris	1.224	0.52473	33835.6	41137.2	1.2158	0.299529
Tryptophanase (EC 4.1.99.1)_x000D_ Tryptophanase	tr|Q133U2|Q133U2_RHOPS / tr|A0A1H8QHV2|A0A1H8QHV2_9BRAD	Q133U2 / A0A1H8QHV2	Rhodopseudomonas palustris (strain BisB5) / Rhodopseudomonas pseudopalustris	0.7679	0.340062	12186.7	9336.6	0.766131	0.071784
Twin-arginine translocation pathway signal_x000D_ Amino acid/amide ABC transporter substrate-binding protein, HAAT family	tr|Q134X8|Q134X8_RHOPS / tr|A0A1H8VBN8|A0A1H8VBN8_9BRAD	Q134X8 / A0A1H8VBN8	Rhodopseudomonas palustris (strain BisB5) / Rhodopseudomonas pseudopalustris	0.5752	0.320017	32234	36680.1	1.13793	0.0462991
O-acetylhomoserine/O-acetylserine sulfhydrylase (EC 2.5.1.49)_x000D_ O-acetylhomoserine sulfhydrylase	tr|Q13BG2|Q13BG2_RHOPS / tr|A0A1H8P087|A0A1H8P087_9BRAD	Q13BG2 / A0A1H8P087	Rhodopseudomonas palustris (strain BisB5) / Rhodopseudomonas pseudopalustris	1.3509	0.497054	214779	300069	1.3971	0.253245
Vitamin B12-dependent ribonucleotide reductase (EC 1.17.4.1)_x000D_ Vitamin B12-dependent ribonucleotide reductase (EC 1.17.4.1)	tr|Q135U9|Q135U9_RHOPS / tr|A0A1H8TD68|A0A1H8TD68_9BRAD	Q135U9 / A0A1H8TD68	Rhodopseudomonas palustris (strain BisB5) / Rhodopseudomonas pseudopalustris	0.2468	0.00531766	3605.1	1161.77	0.322258	0.0475814
Thiamine-phosphate synthase (EC 2.5.1.3) (Thiamine-phosphate pyrophosphorylase)_x000D_ Thiamine-phosphate synthase (EC 2.5.1.3) (Thiamine-phosphate pyrophosphorylase)	tr|Q133T4|Q133T4_RHOPS / tr|A0A1H8QI78|A0A1H8QI78_9BRAD	Q133T4 / A0A1H8QI78	Rhodopseudomonas palustris (strain BisB5) / Rhodopseudomonas pseudopalustris	0.8838	0.632463	4518.98	4669.99	1.03342	0.841092
NLPA lipoprotein	tr|Q134P3|Q134P3_RHOPS	Q134P3	Rhodopseudomonas palustris (strain BisB5)	1.6071	0.367399	586679	1.1172e+06	1.90429	0.0976367
Peptidase M3B, oligoendopeptidase-related clade 3_x000D_ Oligoendopeptidase F_x000D_ M3 family oligoendopeptidase	tr|Q13B91|Q13B91_RHOPS / tr|A0A0N1C8F3|A0A0N1C8F3_9BRAD / tr|A0A418V3Q0|A0A418V3Q0_RHOPL	Q13B91 / A0A0N1C8F3 / A0A418V3Q0	Rhodopseudomonas palustris (strain BisB5) / Rhodopseudomonas sp. AAP120 / Rhodopseudomonas palustris	0.8668	0.633496	15334.1	14076.4	0.91798	0.478739
Acyl-CoA dehydrogenase-like_x000D_ Acyl-CoA dehydrogenase	tr|Q135A7|Q135A7_RHOPS / tr|A0A1H8V6H0|A0A1H8V6H0_9BRAD	Q135A7 / A0A1H8V6H0	Rhodopseudomonas palustris (strain BisB5) / Rhodopseudomonas pseudopalustris	1.3586	0.080686	5289.3	3945.5	0.74594	0.503206
Signal recognition particle receptor FtsY (SRP receptor)_x000D_ Signal recognition particle receptor FtsY (SRP receptor)	tr|Q13DT4|Q13DT4_RHOPS / tr|A0A1H8W639|A0A1H8W639_9BRAD	Q13DT4 / A0A1H8W639	Rhodopseudomonas palustris (strain BisB5) / Rhodopseudomonas pseudopalustris	1.0499	0.829939	11875.8	12418.3	1.04569	0.465123
Inosine-5'-monophosphate dehydrogenase (IMP dehydrogenase) (IMPD) (IMPDH) (EC 1.1.1.205)_x000D_ Inosine-5'-monophosphate dehydrogenase (IMP dehydrogenase) (IMPD) (IMPDH) (EC 1.1.1.205)	tr|Q138J0|Q138J0_RHOPS / tr|A0A1H8VR97|A0A1H8VR97_9BRAD	Q138J0 / A0A1H8VR97	Rhodopseudomonas palustris (strain BisB5) / Rhodopseudomonas pseudopalustris	0.861	0.716076	12129.9	10106.5	0.833188	0.458858
maltose alpha-D-glucosyltransferase (EC 5.4.99.16) (Maltose alpha-D-glucosyltransferase)_x000D_ maltose alpha-D-glucosyltransferase (EC 5.4.99.16) (Maltose alpha-D-glucosyltransferase)	tr|Q133N3|Q133N3_RHOPS / tr|A0A1H8QLQ6|A0A1H8QLQ6_9BRAD	Q133N3 / A0A1H8QLQ6	Rhodopseudomonas palustris (strain BisB5) / Rhodopseudomonas pseudopalustris	2.3575	0.00828128	3564.71	8343.45	2.34057	0.000776791
DNA gyrase subunit B (EC 5.6.2.2)	tr|Q13F95|Q13F95_RHOPS	Q13F95	Rhodopseudomonas palustris (strain BisB5)	0.7951	0.336154	6462.56	5118.76	0.792064	0.00557487
D-3-phosphoglycerate dehydrogenase (EC 1.1.1.95)_x000D_ D-3-phosphoglycerate dehydrogenase (EC 1.1.1.95)	tr|Q131W3|Q131W3_RHOPS / tr|A0A1H8WRE4|A0A1H8WRE4_9BRAD	Q131W3 / A0A1H8WRE4	Rhodopseudomonas palustris (strain BisB5) / Rhodopseudomonas pseudopalustris	0.7434	0.363676	96103.6	69352.7	0.721645	0.0839264
Elongation factor P (EF-P)_x000D_ Elongation factor P (EF-P)_x000D_ Elongation factor P (EF-P)_x000D_ Elongation factor P (EF-P)_x000D_ Elongation factor P (EF-P)_x000D_ Elongation factor P (EF-P)_x000D_ Elongation factor P (EF-P)	tr|E6VLW4|E6VLW4_RHOPX / tr|A0A1H8W1V1|A0A1H8W1V1_9BRAD / tr|A0A323UBB2|A0A323UBB2_RHOPL / tr|A0A2R4GUD2|A0A2R4GUD2_RHOPL / tr|A0A336JUK8|A0A336JUK8_9BRAD / sp|Q2IVV2|EFP_RHOP2 / sp|Q137K5|EFP_RHOPS	E6VLW4 / A0A1H8W1V1 / A0A323UBB2 / A0A2R4GUD2 / A0A336JUK8 / Q2IVV2 / Q137K5	Rhodopseudomonas palustris (strain DX-1) / Rhodopseudomonas pseudopalustris / Rhodopseudomonas palustris / Rhodopseudomonas palustris / Rhodopseudomonas pentothenatexigens / Rhodopseudomonas palustris (strain HaA2) / Rhodopseudomonas palustris (strain BisB5)	0.7428	0.293893	28005.3	20488.7	0.731598	0.098727
Chaperonin GroEL (EC 5.6.1.7) (60 kDa chaperonin) (Chaperonin-60) (Cpn60)	tr|E6VFE5|E6VFE5_RHOPX	E6VFE5	Rhodopseudomonas palustris (strain DX-1)	0.8901	0.666228	266421	235257	0.883025	0.461072
Pyruvate flavodoxin/ferredoxin oxidoreductase domain protein	tr|E6VFX8|E6VFX8_RHOPX	E6VFX8	Rhodopseudomonas palustris (strain DX-1)	0.6979	0.226273	69202.5	47593.9	0.687748	0.0153432
Chaperone protein HtpG (Heat shock protein HtpG) (High temperature protein G)_x000D_ Chaperone protein HtpG (Heat shock protein HtpG) (High temperature protein G)_x000D_ Chaperone protein HtpG (Heat shock protein HtpG) (High temperature protein G)_x000D_ Chaperone protein HtpG (Heat shock protein HtpG) (High temperature protein G)	tr|E6VH40|E6VH40_RHOPX / tr|B3QDC8|B3QDC8_RHOPT / tr|A0A323UGD5|A0A323UGD5_RHOPL / tr|A0A336JIJ6|A0A336JIJ6_9BRAD	E6VH40 / B3QDC8 / A0A323UGD5 / A0A336JIJ6	Rhodopseudomonas palustris (strain DX-1) / Rhodopseudomonas palustris (strain TIE-1) / Rhodopseudomonas palustris / Rhodopseudomonas pentothenatexigens	1.0777	0.823055	30963.6	26602.7	0.859161	0.385476
Enolase (EC 4.2.1.11) (2-phospho-D-glycerate hydro-lyase) (2-phosphoglycerate dehydratase)_x000D_ Enolase (EC 4.2.1.11) (2-phospho-D-glycerate hydro-lyase) (2-phosphoglycerate dehydratase)_x000D_ Enolase (EC 4.2.1.11) (2-phospho-D-glycerate hydro-lyase) (2-phosphoglycerate dehydratase)	tr|E6VHM1|E6VHM1_RHOPX / tr|A0A323UGE9|A0A323UGE9_RHOPL / tr|A0A336JLV0|A0A336JLV0_9BRAD	E6VHM1 / A0A323UGE9 / A0A336JLV0	Rhodopseudomonas palustris (strain DX-1) / Rhodopseudomonas palustris / Rhodopseudomonas pentothenatexigens	1.0614	0.827066	42153.2	44205.2	1.04868	0.691729
Electron transfer flavoprotein alpha/beta-subunit_x000D_ Electron transfer flavoprotein alpha/beta-subunit_x000D_ Electron transfer flavoprotein subunit beta/FixA family protein_x000D_ Electron transfer flavoprotein beta subunit_x000D_ Electron transfer flavoprotein beta subunit	tr|E6VG09|E6VG09_RHOPX / tr|B3QCB9|B3QCB9_RHOPT / tr|A0A323UE14|A0A323UE14_RHOPL / tr|A0A2R4H0Q5|A0A2R4H0Q5_RHOPL / tr|A0A336JYX8|A0A336JYX8_9BRAD	E6VG09 / B3QCB9 / A0A323UE14 / A0A2R4H0Q5 / A0A336JYX8	Rhodopseudomonas palustris (strain DX-1) / Rhodopseudomonas palustris (strain TIE-1) / Rhodopseudomonas palustris / Rhodopseudomonas palustris / Rhodopseudomonas pentothenatexigens	1.5823	0.0743387	64795.8	102212	1.57745	0.00114914
Methylmalonate-semialdehyde dehydrogenase_x000D_ Methylmalonate-semialdehyde dehydrogenase (CoA acylating)	tr|E6VNB7|E6VNB7_RHOPX / tr|A0A323UNL6|A0A323UNL6_RHOPL	E6VNB7 / A0A323UNL6	Rhodopseudomonas palustris (strain DX-1) / Rhodopseudomonas palustris	1.26	0.242813	28435.6	35462.3	1.24711	0.000628046
Protein HflC	tr|E6VMJ0|E6VMJ0_RHOPX	E6VMJ0	Rhodopseudomonas palustris (strain DX-1)	1.7986	0.0978927	10400.5	18012	1.73185	0.00502936
2-isopropylmalate synthase (EC 2.3.3.13) (Alpha-IPM synthase) (Alpha-isopropylmalate synthase)_x000D_ 2-isopropylmalate synthase (EC 2.3.3.13) (Alpha-IPM synthase) (Alpha-isopropylmalate synthase)_x000D_ 2-isopropylmalate synthase (EC 2.3.3.13) (Alpha-IPM synthase) (Alpha-isopropylmalate synthase)_x000D_ 2-isopropylmalate synthase (EC 2.3.3.13) (Alpha-IPM synthase) (Alpha-isopropylmalate synthase…	tr|E6VCW4|E6VCW4_RHOPX / tr|A0A0N0KJU7|A0A0N0KJU7_9BRAD / tr|A0A418VD26|A0A418VD26_RHOPL / tr|A0A2R4GT15|A0A2R4GT15_RHOPL / tr|A0A336JYW3|A0A336JYW3_9BRAD / sp|Q2IUT4|LEU1_RHOP2	E6VCW4 / A0A0N0KJU7 / A0A418VD26 / A0A2R4GT15 / A0A336JYW3 / Q2IUT4	Rhodopseudomonas palustris (strain DX-1) / Rhodopseudomonas sp. AAP120 / Rhodopseudomonas palustris / Rhodopseudomonas palustris / Rhodopseudomonas pentothenatexigens / Rhodopseudomonas palustris (strain HaA2)	1.0017	0.994958	11471.4	11948.2	1.04157	0.835751
Chitooligosaccharide deacetylase (Nodulation protein B)_x000D_ Chitooligosaccharide deacetylase (Nodulation protein B)	tr|E6VEE7|E6VEE7_RHOPX / tr|A0A336JWQ7|A0A336JWQ7_9BRAD	E6VEE7 / A0A336JWQ7	Rhodopseudomonas palustris (strain DX-1) / Rhodopseudomonas pentothenatexigens	0.2616	0.0841198	11164.2	5189.53	0.464835	0.00320956
Bifunctional purine biosynthesis protein PurH [Includes: Phosphoribosylaminoimidazolecarboxamide formyltransferase (EC 2.1.2.3) (AICAR transformylase); IMP cyclohydrolase (EC 3.5.4.10) (ATIC) (IMP synthase) (Inosinicase)]	tr|E6VE60|E6VE60_RHOPX	E6VE60	Rhodopseudomonas palustris (strain DX-1)	0.984	0.947609	44013.6	45333.7	1.02999	0.888339
Inosine-5'-monophosphate dehydrogenase (IMP dehydrogenase) (IMPD) (IMPDH) (EC 1.1.1.205)	tr|E6VQA1|E6VQA1_RHOPX	E6VQA1	Rhodopseudomonas palustris (strain DX-1)	0.9116	0.703341	17083.4	15410	0.902047	0.281087
Nitrogen regulatory protein P-II_x000D_ Nitrogen regulatory protein P-II_x000D_ Nitrogen regulatory protein P-II	tr|E6VIW5|E6VIW5_RHOPX / tr|A0A323UFL0|A0A323UFL0_RHOPL / tr|A0A336JXH3|A0A336JXH3_9BRAD	E6VIW5 / A0A323UFL0 / A0A336JXH3	Rhodopseudomonas palustris (strain DX-1) / Rhodopseudomonas palustris / Rhodopseudomonas pentothenatexigens	1.7312	0.119874	34634.3	40369.2	1.16558	0.331592
Glutamine--tRNA ligase (EC 6.1.1.18) (Glutaminyl-tRNA synthetase) (GlnRS)	tr|B3Q6P4|B3Q6P4_RHOPT	B3Q6P4	Rhodopseudomonas palustris (strain TIE-1)	0.9928	0.974695	8695.22	8501.68	0.977742	0.773973
GTP pyrophosphokinase rsh ((p)ppGpp synthase) (ATP:GTP 3'-pyrophosphotransferase)	tr|Q2IWU9|Q2IWU9_RHOP2	Q2IWU9	Rhodopseudomonas palustris (strain HaA2)	1.4	0.291128	3196.26	4071.96	1.27397	0.0531954
O-acetylhomoserine/O-acetylserine sulfhydrylase (EC 2.5.1.49)	tr|Q2J0E0|Q2J0E0_RHOP2	Q2J0E0	Rhodopseudomonas palustris (strain HaA2)	1.3316	0.520721	247693	340849	1.37609	0.276846
magnesium chelatase (EC 6.6.1.1)	tr|Q2ISY8|Q2ISY8_RHOP2	Q2ISY8	Rhodopseudomonas palustris (strain HaA2)	0.2791	0.00342919	7892.58	2545.11	0.322469	0.000642131
ErfK/YbiS/YcfS/YnhG	tr|Q2IR05|Q2IR05_RHOP2	Q2IR05	Rhodopseudomonas palustris (strain HaA2)	0.7176	0.389413	12628.2	10014.3	0.793008	0.3758
DUF3597 domain-containing protein	tr|Q2IWI3|Q2IWI3_RHOP2	Q2IWI3	Rhodopseudomonas palustris (strain HaA2)	4.7528	0.00872262	9136.9	30826.1	3.3738	0.000322425
Sulfite reductase, hemoprotein subunit	tr|Q2J099|Q2J099_RHOP2	Q2J099	Rhodopseudomonas palustris (strain HaA2)	0.9433	0.874973	10508.4	9791.95	0.931824	0.736777
Bifunctional protein FolD [Includes: Methylenetetrahydrofolate dehydrogenase (EC 1.5.1.5); Methenyltetrahydrofolate cyclohydrolase (EC 3.5.4.9)]_x000D_ Bifunctional protein FolD [Includes: Methylenetetrahydrofolate dehydrogenase (EC 1.5.1.5); Methenyltetrahydrofolate cyclohydrolase (EC 3.5.4.9)]	tr|A0A0N1CAH6|A0A0N1CAH6_9BRAD / tr|A0A418VLL6|A0A418VLL6_RHOPL	A0A0N1CAH6 / A0A418VLL6	Rhodopseudomonas sp. AAP120 / Rhodopseudomonas palustris	0.9988	0.995683	11873.4	11808.3	0.994517	0.967613
2,3-bisphosphoglycerate-dependent phosphoglycerate mutase (BPG-dependent PGAM) (PGAM) (Phosphoglyceromutase) (dPGM) (EC 5.4.2.11)_x000D_ 2,3-bisphosphoglycerate-dependent phosphoglycerate mutase (BPG-dependent PGAM) (PGAM) (Phosphoglyceromutase) (dPGM) (EC 5.4.2.11)	tr|A0A0N0KJV4|A0A0N0KJV4_9BRAD / tr|A0A418VI62|A0A418VI62_RHOPL	A0A0N0KJV4 / A0A418VI62	Rhodopseudomonas sp. AAP120 / Rhodopseudomonas palustris	0.8977	0.701519	55423.5	48596.1	0.876813	0.218036
Ubiquinone biosynthesis O-methyltransferase (2-polyprenyl-6-hydroxyphenol methylase) (EC 2.1.1.222) (3-demethylubiquinone 3-O-methyltransferase) (EC 2.1.1.64)_x000D_ Ubiquinone biosynthesis O-methyltransferase (2-polyprenyl-6-hydroxyphenol methylase) (EC 2.1.1.222) (3-demethylubiquinone 3-O-methyltransferase) (EC 2.1.1.64)_x000D_ Ubiquinone biosynthesis O-methyltransferase (2-polyprenyl-6-hydroxy…	tr|A0A0N0KGE8|A0A0N0KGE8_9BRAD / tr|A0A418VL98|A0A418VL98_RHOPL / tr|A0A323UGF6|A0A323UGF6_RHOPL / tr|A0A1H8MBK0|A0A1H8MBK0_9BRAD / sp|Q13EZ9|UBIG_RHOPS / sp|Q2J419|UBIG_RHOP2	A0A0N0KGE8 / A0A418VL98 / A0A323UGF6 / A0A1H8MBK0 / Q13EZ9 / Q2J419	Rhodopseudomonas sp. AAP120 / Rhodopseudomonas palustris / Rhodopseudomonas palustris / Rhodopseudomonas pseudopalustris / Rhodopseudomonas palustris (strain BisB5) / Rhodopseudomonas palustris (strain HaA2)	1.0751	0.617388	11723	12430.1	1.06032	0.593702
30S ribosomal protein S8_x000D_ 30S ribosomal protein S8	tr|A0A0N1CDE2|A0A0N1CDE2_9BRAD / tr|A0A418V496|A0A418V496_RHOPL	A0A0N1CDE2 / A0A418V496	Rhodopseudomonas sp. AAP120 / Rhodopseudomonas palustris	0.903	0.633651	143153	128464	0.897389	0.291929
ATP synthase gamma chain (ATP synthase F1 sector gamma subunit) (F-ATPase gamma subunit)_x000D_ ATP synthase gamma chain (ATP synthase F1 sector gamma subunit) (F-ATPase gamma subunit)_x000D_ ATP synthase gamma chain (ATP synthase F1 sector gamma subunit) (F-ATPase gamma subunit)_x000D_ ATP synthase gamma chain (ATP synthase F1 sector gamma subunit) (F-ATPase gamma subunit)	tr|A0A0N1CCC7|A0A0N1CCC7_9BRAD / tr|A0A323UTE2|A0A323UTE2_RHOPL / tr|A0A418VDH9|A0A418VDH9_RHOPL / sp|Q21CY6|ATPG_RHOPB	A0A0N1CCC7 / A0A323UTE2 / A0A418VDH9 / Q21CY6	Rhodopseudomonas sp. AAP120 / Rhodopseudomonas palustris / Rhodopseudomonas palustris / Rhodopseudomonas palustris (strain BisB18)	1.0854	0.698272	57798.1	62035	1.07331	0.579983
Phenylalanine--tRNA ligase beta subunit (EC 6.1.1.20) (Phenylalanyl-tRNA synthetase beta subunit) (PheRS)_x000D_ Phenylalanine--tRNA ligase beta subunit (EC 6.1.1.20) (Phenylalanyl-tRNA synthetase beta subunit) (PheRS)	tr|A0A0N1C9D5|A0A0N1C9D5_9BRAD / tr|A0A323UE04|A0A323UE04_RHOPL	A0A0N1C9D5 / A0A323UE04	Rhodopseudomonas sp. AAP120 / Rhodopseudomonas palustris	0.9471	0.801617	25404.5	23817.3	0.937523	0.436509
Phosphoenolpyruvate carboxykinase (ATP) (PCK) (PEP carboxykinase) (PEPCK) (EC 4.1.1.49)_x000D_ Phosphoenolpyruvate carboxykinase (ATP) (PCK) (PEP carboxykinase) (PEPCK) (EC 4.1.1.49)	tr|A0A0N1LVP7|A0A0N1LVP7_9BRAD / sp|Q2J2Y8|PCKA_RHOP2	A0A0N1LVP7 / Q2J2Y8	Rhodopseudomonas sp. AAP120 / Rhodopseudomonas palustris (strain HaA2)	0.7376	0.205964	91473	67234.2	0.735017	0.000374841
3-oxoacyl-ACP synthase (EC 2.3.1.41)_x000D_ Beta-ketoacyl-ACP synthase I	tr|A0A0N0KGQ1|A0A0N0KGQ1_9BRAD / tr|A0A418VIY0|A0A418VIY0_RHOPL	A0A0N0KGQ1 / A0A418VIY0	Rhodopseudomonas sp. AAP120 / Rhodopseudomonas palustris	1.164	0.503956	22964.7	27419.2	1.19397	0.0674453
O-succinylhomoserine sulfhydrylase (OSH sulfhydrylase) (OSHS sulfhydrylase) (EC 2.5.1.-)_x000D_ O-succinylhomoserine sulfhydrylase (OSH sulfhydrylase) (OSHS sulfhydrylase) (EC 2.5.1.-)	tr|A0A0N1LRK3|A0A0N1LRK3_9BRAD / tr|A0A418V303|A0A418V303_RHOPL	A0A0N1LRK3 / A0A418V303	Rhodopseudomonas sp. AAP120 / Rhodopseudomonas palustris	1.103	0.603848	27876.6	29375.7	1.05378	0.784464
maltose alpha-D-glucosyltransferase (EC 5.4.99.16) (Maltose alpha-D-glucosyltransferase)_x000D_ maltose alpha-D-glucosyltransferase (EC 5.4.99.16) (Maltose alpha-D-glucosyltransferase)	tr|A0A0N1CAQ5|A0A0N1CAQ5_9BRAD / tr|A0A418VG89|A0A418VG89_RHOPL	A0A0N1CAQ5 / A0A418VG89	Rhodopseudomonas sp. AAP120 / Rhodopseudomonas palustris	2.4512	0.00666117	3506.71	7928.62	2.26099	0.000548485
Isocitrate lyase (EC 4.1.3.1) (Isocitrase) (Isocitratase)_x000D_ Isocitrate lyase (EC 4.1.3.1) (Isocitrase) (Isocitratase)_x000D_ Isocitrate lyase (EC 4.1.3.1) (Isocitrase) (Isocitratase)	tr|A0A0N0KGL6|A0A0N0KGL6_9BRAD / tr|A0A418UWZ0|A0A418UWZ0_RHOPL / tr|A0A336JZB7|A0A336JZB7_9BRAD	A0A0N0KGL6 / A0A418UWZ0 / A0A336JZB7	Rhodopseudomonas sp. AAP120 / Rhodopseudomonas palustris / Rhodopseudomonas pentothenatexigens	0.3884	0.0228103	119196	46206.3	0.387649	0.00125681
50S ribosomal protein L2_x000D_ 50S ribosomal protein L2_x000D_ 50S ribosomal protein L2_x000D_ 50S ribosomal protein L2	tr|A0A1H8VE11|A0A1H8VE11_9BRAD / sp|Q2IXQ7|RL2_RHOP2 / sp|Q07KM1|RL2_RHOP5 / sp|Q134T2|RL2_RHOPS	A0A1H8VE11 / Q2IXQ7 / Q07KM1 / Q134T2	Rhodopseudomonas pseudopalustris / Rhodopseudomonas palustris (strain HaA2) / Rhodopseudomonas palustris (strain BisA53) / Rhodopseudomonas palustris (strain BisB5)	0.7777	0.401183	90092.5	68080.3	0.755671	0.0521268
Cystathionine beta-synthase	tr|A0A2R4GTT0|A0A2R4GTT0_RHOPL	A0A2R4GTT0	Rhodopseudomonas palustris	0.3692	0.0342915	19714.1	8367.45	0.424439	0.00135675
Adenine phosphoribosyltransferase (APRT) (EC 2.4.2.7)	tr|A0A0D7EBW1|A0A0D7EBW1_RHOPL	A0A0D7EBW1	Rhodopseudomonas palustris	0.9459	0.808648	37927.6	35342.3	0.931834	0.452121
Ribonuclease J	tr|A0A418UY43|A0A418UY43_RHOPL	A0A418UY43	Rhodopseudomonas palustris	1.0564	0.786665	13063.8	13166.5	1.00786	0.971867
Translation initiation factor IF-2	tr|A0A0D7E4T8|A0A0D7E4T8_RHOPL	A0A0D7E4T8	Rhodopseudomonas palustris	0.8283	0.383608	19695.3	16261.1	0.825632	0.000205788
RNA polymerase sigma factor RpoD	tr|A0A0D7EHB5|A0A0D7EHB5_RHOPL	A0A0D7EHB5	Rhodopseudomonas palustris	0.8259	0.564893	10249.8	9040.5	0.882018	0.402239
Elongation factor Tu (EC 3.6.5.3)	tr|A0A323UCI0|A0A323UCI0_RHOPL	A0A323UCI0	Rhodopseudomonas palustris	1.0345	0.888856	123976	126149	1.01752	0.876831
Metal-binding domain containing of MaoC dehydratase	tr|A0A0D7EP60|A0A0D7EP60_RHOPL	A0A0D7EP60	Rhodopseudomonas palustris	0.6462	0.25638	18781.6	12285.8	0.65414	0.10216
Citrate synthase	tr|A0A2R4GUU0|A0A2R4GUU0_RHOPL	A0A2R4GUU0	Rhodopseudomonas palustris	1.5834	0.336858	1682.3	2192.76	1.30343	0.175012
Protein RecA (Recombinase A)	tr|A0A418VKM1|A0A418VKM1_RHOPL	A0A418VKM1	Rhodopseudomonas palustris	0.8014	0.596624	8859.56	7678.9	0.866737	0.745323
Pyruvate-flavodoxin oxidoreductase	tr|A0A0D7EHG7|A0A0D7EHG7_RHOPL	A0A0D7EHG7	Rhodopseudomonas palustris	0.7432	0.279984	74207.4	54748.9	0.737783	0.0175412
Aspartate--tRNA(Asp/Asn) ligase (EC 6.1.1.23) (Aspartyl-tRNA synthetase) (AspRS) (Non-discriminating aspartyl-tRNA synthetase) (ND-AspRS)	tr|A0A323UJD6|A0A323UJD6_RHOPL	A0A323UJD6	Rhodopseudomonas palustris	0.8945	0.634674	15614.5	13760	0.881231	0.248333
ribonucleoside-diphosphate reductase (EC 1.17.4.1)	tr|A0A0D7EBK0|A0A0D7EBK0_RHOPL	A0A0D7EBK0	Rhodopseudomonas palustris	0.2142	0.00378884	2975.95	1005.38	0.337835	0.0396684
Polyphosphate kinase (EC 2.7.4.1) (ATP-polyphosphate phosphotransferase) (Polyphosphoric acid kinase)	tr|A0A0D7ETK9|A0A0D7ETK9_RHOPL	A0A0D7ETK9	Rhodopseudomonas palustris	2.1041	0.00417521	10106.5	21348.7	2.11238	0.000338915
Ribonuclease PH (RNase PH) (EC 2.7.7.56) (tRNA nucleotidyltransferase)_x000D_ Ribonuclease PH (RNase PH) (EC 2.7.7.56) (tRNA nucleotidyltransferase)	tr|A0A0D7EFP9|A0A0D7EFP9_RHOPL / sp|Q21CI6|RNPH_RHOPB	A0A0D7EFP9 / Q21CI6	Rhodopseudomonas palustris / Rhodopseudomonas palustris (strain BisB18)	1.2269	0.270991	10642.3	12567.6	1.18092	0.249915
Pyruvate-flavodoxin oxidoreductase	tr|A0A323UDR3|A0A323UDR3_RHOPL	A0A323UDR3	Rhodopseudomonas palustris	0.7111	0.237515	70091.6	49192.8	0.701836	0.0144194
50S ribosomal protein L2	tr|A0A418V4A8|A0A418V4A8_RHOPL	A0A418V4A8	Rhodopseudomonas palustris	0.8285	0.501141	88021.7	71583.6	0.813249	0.0785471
Oligoendopeptidase F	tr|A0A0D7EJW9|A0A0D7EJW9_RHOPL	A0A0D7EJW9	Rhodopseudomonas palustris	0.8846	0.678859	13251.5	12440.3	0.938791	0.565508
Protein RecA (Recombinase A)	tr|A0A2R4GY90|A0A2R4GY90_RHOPL	A0A2R4GY90	Rhodopseudomonas palustris	0.9028	0.787266	9729.43	8616.19	0.885581	0.784424
NADPH-dependent 7-cyano-7-deazaguanine reductase (EC 1.7.1.13) (7-cyano-7-carbaguanine reductase) (NADPH-dependent nitrile oxidoreductase) (PreQ(0) reductase)	tr|A0A0D7EVI6|A0A0D7EVI6_RHOPL	A0A0D7EVI6	Rhodopseudomonas palustris	0.6654	0.415662	12306.1	8549.71	0.694756	0.246508
DNA topoisomerase 1 (EC 5.6.2.1) (DNA topoisomerase I)	tr|A0A0D7DX52|A0A0D7DX52_RHOPL	A0A0D7DX52	Rhodopseudomonas palustris	0.7605	0.223733	5003.37	3950.98	0.789665	0.0275575
Serine hydroxymethyltransferase (SHMT) (Serine methylase) (EC 2.1.2.1)	tr|A0A418VQK7|A0A418VQK7_RHOPL	A0A418VQK7	Rhodopseudomonas palustris	0.7076	0.436581	17952.5	14500.7	0.807726	0.366229
Glycoside hydrolase family 43	tr|A0A0D7EEK6|A0A0D7EEK6_RHOPL	A0A0D7EEK6	Rhodopseudomonas palustris	0.9905	0.971127	3687.8	3671.26	0.995513	0.962394
50S ribosomal protein L25 (General stress protein CTC)_x000D_ 50S ribosomal protein L25 (General stress protein CTC)	tr|A0A418UWT4|A0A418UWT4_RHOPL / tr|A0A0N0KIL1|A0A0N0KIL1_9BRAD	A0A418UWT4 / A0A0N0KIL1	Rhodopseudomonas palustris / Rhodopseudomonas sp. AAP120	0.8548	0.576504	120410	101367	0.841856	0.12497
3-oxoacyl-ACP synthase (EC 2.3.1.41)	tr|A0A0D7E830|A0A0D7E830_RHOPL	A0A0D7E830	Rhodopseudomonas palustris	1.2793	0.258031	35239.7	46487.5	1.31918	0.00927537
NADH-quinone oxidoreductase (EC 7.1.1.-)	tr|A0A0D7E7M0|A0A0D7E7M0_RHOPL	A0A0D7E7M0	Rhodopseudomonas palustris	1.0313	0.877362	7318.92	7507.79	1.02581	0.358567
Ribulose bisphosphate carboxylase large chain (RuBisCO large subunit) (EC 4.1.1.39)	tr|A0A2R4GVS4|A0A2R4GVS4_RHOPL	A0A2R4GVS4	Rhodopseudomonas palustris	1.4767	0.321195	724846	1.00192e+06	1.38226	0.10946
50S ribosomal protein L2	tr|A0A0D7EMS1|A0A0D7EMS1_RHOPL	A0A0D7EMS1	Rhodopseudomonas palustris	0.8552	0.686606	50032.7	39617	0.791821	0.241806
Enoyl-[acyl-carrier-protein] reductase [NADH] (EC 1.3.1.9)	tr|A0A0D7DX91|A0A0D7DX91_RHOPL	A0A0D7DX91	Rhodopseudomonas palustris	1.0523	0.847266	52287.6	54211.7	1.0368	0.642347
Pyruvate-flavodoxin oxidoreductase	tr|A0A2R4H0L8|A0A2R4H0L8_RHOPL	A0A2R4H0L8	Rhodopseudomonas palustris	0.6994	0.225938	70461.4	48571.6	0.689337	0.0150571
Inosine-5'-monophosphate dehydrogenase (IMP dehydrogenase) (IMPD) (IMPDH) (EC 1.1.1.205)	tr|A0A418VCN8|A0A418VCN8_RHOPL	A0A418VCN8	Rhodopseudomonas palustris	0.9434	0.786636	16115.2	15023.9	0.932285	0.342367
ATP synthase F0F1 subunit gamma	tr|A0A0D7E495|A0A0D7E495_RHOPL	A0A0D7E495	Rhodopseudomonas palustris	1.0826	0.712833	56770.7	61670	1.0863	0.551121
Oxidoreductase	tr|A0A0D7F4G1|A0A0D7F4G1_RHOPL	A0A0D7F4G1	Rhodopseudomonas palustris	1.6761	0.311343	3915.88	7269.93	1.85653	0.211148
Peptide chain release factor 2 (RF-2)	tr|A0A418VJJ1|A0A418VJJ1_RHOPL	A0A418VJJ1	Rhodopseudomonas palustris	0.9883	0.936531	7873.18	7648.31	0.971438	0.768853
PCLP domain-containing protein_x000D_ PCLP domain-containing protein	tr|A0A418UX21|A0A418UX21_RHOPL / tr|A0A0N0KHU9|A0A0N0KHU9_9BRAD	A0A418UX21 / A0A0N0KHU9	Rhodopseudomonas palustris / Rhodopseudomonas sp. AAP120	1.6364	0.344928	27858.2	43483.6	1.56089	0.166124
Acyl-CoA dehydrogenase_x000D_ Acyl-CoA dehydrogenase	tr|A0A2R4GVQ3|A0A2R4GVQ3_RHOPL / tr|A0A323UVW9|A0A323UVW9_RHOPL	A0A2R4GVQ3 / A0A323UVW9	Rhodopseudomonas palustris	1.6012	0.0280911	10020.8	15994.8	1.59615	0.00771195
Nitrogenase iron protein (EC 1.18.6.1) (Nitrogenase Fe protein) (Nitrogenase component II) (Nitrogenase reductase)	tr|A0A418UXT7|A0A418UXT7_RHOPL	A0A418UXT7	Rhodopseudomonas palustris	0.9187	0.757358	5599.26	4979.47	0.889308	0.546397
DNA topoisomerase 4 subunit B (EC 5.6.2.2) (Topoisomerase IV subunit B)	tr|A0A0D7EVR0|A0A0D7EVR0_RHOPL	A0A0D7EVR0	Rhodopseudomonas palustris	0.6659	0.118415	5443.83	3482.94	0.639796	0.0790437
Acyl-CoA carboxylase subunit beta	tr|A0A418V1Q4|A0A418V1Q4_RHOPL	A0A418V1Q4	Rhodopseudomonas palustris	0.7423	0.227271	35748.2	26004.4	0.727431	0.0337353
Phenylalanine--tRNA ligase beta subunit (EC 6.1.1.20) (Phenylalanyl-tRNA synthetase beta subunit) (PheRS)	tr|A0A418VIS9|A0A418VIS9_RHOPL	A0A418VIS9	Rhodopseudomonas palustris	0.9916	0.968319	27119.2	26675.4	0.983635	0.854304
GCN5 family acetyltransferase	tr|A0A0D7EF64|A0A0D7EF64_RHOPL	A0A0D7EF64	Rhodopseudomonas palustris	3.0498	0.000990146	5223.3	15035.7	2.87858	6.43238e-05
D-3-phosphoglycerate dehydrogenase (EC 1.1.1.95)	tr|A0A418UXW3|A0A418UXW3_RHOPL	A0A418UXW3	Rhodopseudomonas palustris	0.7498	0.359327	89182	65059.7	0.729516	0.0815195
Elongation factor P (EF-P)	tr|A0A418V151|A0A418V151_RHOPL	A0A418V151	Rhodopseudomonas palustris	0.9861	0.956722	20560.9	20023.4	0.973855	0.806508
Carbon monoxide dehydrogenase	tr|A0A0D7EYQ5|A0A0D7EYQ5_RHOPL	A0A0D7EYQ5	Rhodopseudomonas palustris	1.0605	0.829801	3585.48	3726.26	1.03926	0.76939
30S ribosomal protein S2	tr|A0A418V2N0|A0A418V2N0_RHOPL	A0A418V2N0	Rhodopseudomonas palustris	0.9605	0.849508	76590.2	73354.5	0.957753	0.683346
Acyl-CoA carboxylase subunit beta	tr|A0A418V417|A0A418V417_RHOPL	A0A418V417	Rhodopseudomonas palustris	0.7312	0.217626	36169.6	25911.6	0.716392	0.0276897
Elongation factor Tu_x000D_ Elongation factor Tu (EF-Tu)	tr|A0A323UJG2|A0A323UJG2_RHOPL / tr|A0A336JHL4|A0A336JHL4_9BRAD	A0A323UJG2 / A0A336JHL4	Rhodopseudomonas palustris / Rhodopseudomonas pentothenatexigens	0.9835	0.939791	250123	243298	0.972714	0.54292
Phosphoenolpyruvate carboxykinase (ATP) (PCK) (PEP carboxykinase) (PEPCK) (EC 4.1.1.49)_x000D_ Phosphoenolpyruvate carboxykinase (ATP) (PCK) (PEP carboxykinase) (PEPCK) (EC 4.1.1.49)_x000D_ Phosphoenolpyruvate carboxykinase (ATP) (PCK) (PEP carboxykinase) (PEPCK) (EC 4.1.1.49)_x000D_ Phosphoenolpyruvate carboxykinase (ATP) (PCK) (PEP carboxykinase) (PEPCK) (EC 4.1.1.49)_x000D_ Phosphoenolpyruvate…	tr|A0A2R4GN72|A0A2R4GN72_RHOPL / tr|A0A323UKT7|A0A323UKT7_RHOPL / tr|A0A336JWU2|A0A336JWU2_9BRAD / tr|E6VI12|E6VI12_RHOPX / sp|Q9ZNH4|PCKA_RHOPA / sp|B3Q999|PCKA_RHOPT	A0A2R4GN72 / A0A323UKT7 / A0A336JWU2 / E6VI12 / Q9ZNH4 / B3Q999	Rhodopseudomonas palustris / Rhodopseudomonas palustris / Rhodopseudomonas pentothenatexigens / Rhodopseudomonas palustris (strain DX-1) / Rhodopseudomonas palustris (strain ATCC BAA-98 / CGA009) / Rhodopseudomonas palustris (strain TIE-1)	0.7439	0.212988	89161.5	66081.2	0.741141	0.000383914
CoA-acylating methylmalonate-semialdehyde dehydrogenase_x000D_ Methylmalonate-semialdehyde dehydrogenase	tr|A0A418UZ56|A0A418UZ56_RHOPL / tr|A0A0N0KE21|A0A0N0KE21_9BRAD	A0A418UZ56 / A0A0N0KE21	Rhodopseudomonas palustris / Rhodopseudomonas sp. AAP120	1.2554	0.256487	27000.1	33583.2	1.24382	0.00031239
Homoserine dehydrogenase (EC 1.1.1.3)	tr|A0A0D7EKB9|A0A0D7EKB9_RHOPL	A0A0D7EKB9	Rhodopseudomonas palustris	0.819	0.389214	5843.72	4924.12	0.842633	0.135275
Signal recognition particle receptor FtsY (SRP receptor)	tr|A0A418VI81|A0A418VI81_RHOPL	A0A418VI81	Rhodopseudomonas palustris	1.0477	0.837987	14160.9	14748.8	1.04152	0.501701
N-ethylmaleimide reductase	tr|A0A0D7E195|A0A0D7E195_RHOPL	A0A0D7E195	Rhodopseudomonas palustris	1.6755	0.0614682	6980.77	11073.3	1.58626	0.0592033
Energy-dependent translational throttle protein EttA (EC 3.6.1.-) (Translational regulatory factor EttA)	tr|A0A0D7EE92|A0A0D7EE92_RHOPL	A0A0D7EE92	Rhodopseudomonas palustris	0.9264	0.757201	14352.2	13309.5	0.927352	0.391517
Malate dehydrogenase (EC 1.1.1.37)	tr|A0A0D7EWF2|A0A0D7EWF2_RHOPL	A0A0D7EWF2	Rhodopseudomonas palustris	0.8623	0.585405	110823	96406.4	0.869911	0.0539285
Bifunctional O-acetylhomoserine aminocarboxypropyltransferase/cysteine synthase (EC 2.5.1.49)_x000D_ O-acetylhomoserine sulfhydrylase	tr|A0A323ULP2|A0A323ULP2_RHOPL / tr|A0A336K1W0|A0A336K1W0_9BRAD	A0A323ULP2 / A0A336K1W0	Rhodopseudomonas palustris / Rhodopseudomonas pentothenatexigens	1.1818	0.711166	364545	424268	1.16383	0.588062
maltose alpha-D-glucosyltransferase (EC 5.4.99.16) (Maltose alpha-D-glucosyltransferase)_x000D_ maltose alpha-D-glucosyltransferase (EC 5.4.99.16) (Maltose alpha-D-glucosyltransferase)	tr|A0A2R4GXP6|A0A2R4GXP6_RHOPL / tr|A0A323UAA3|A0A323UAA3_RHOPL	A0A2R4GXP6 / A0A323UAA3	Rhodopseudomonas palustris	2.2227	0.0248815	3069.81	6082.69	1.98145	0.000673583
Ribose ABC transporter substrate-binding protein RbsB	tr|A0A418UX05|A0A418UX05_RHOPL	A0A418UX05	Rhodopseudomonas palustris	0.9071	0.698326	5106.12	4445.29	0.870581	0.398562
Enoyl-[acyl-carrier-protein] reductase [NADH] (EC 1.3.1.9)	tr|A0A0D7F558|A0A0D7F558_RHOPL	A0A0D7F558	Rhodopseudomonas palustris	1.0251	0.910187	50947.6	51719.6	1.01515	0.810984
30S ribosomal protein S8_x000D_ 30S ribosomal protein S8	tr|A0A0D7EMR1|A0A0D7EMR1_RHOPL / sp|Q211G2|RS8_RHOPB	A0A0D7EMR1 / Q211G2	Rhodopseudomonas palustris / Rhodopseudomonas palustris (strain BisB18)	0.8987	0.619747	168294	150314	0.893165	0.273276
Nitrogenase molybdenum-iron protein subunit beta	tr|A0A0D7EI00|A0A0D7EI00_RHOPL	A0A0D7EI00	Rhodopseudomonas palustris	1.2862	0.367564	3921	4490	1.14512	0.563617
2-isopropylmalate synthase (EC 2.3.3.13) (Alpha-IPM synthase) (Alpha-isopropylmalate synthase)_x000D_ 2-isopropylmalate synthase (EC 2.3.3.13) (Alpha-IPM synthase) (Alpha-isopropylmalate synthase)_x000D_ 2-isopropylmalate synthase (EC 2.3.3.13) (Alpha-IPM synthase) (Alpha-isopropylmalate synthase)_x000D_ 2-isopropylmalate synthase (EC 2.3.3.13) (Alpha-IPM synthase) (Alpha-isopropylmalate synthase…	tr|A0A323UIH8|A0A323UIH8_RHOPL / tr|A0A1H8SBA1|A0A1H8SBA1_9BRAD / sp|Q138Z2|LEU1_RHOPS / sp|B3QCX5|LEU1_RHOPT / sp|Q6N858|LEU1_RHOPA	A0A323UIH8 / A0A1H8SBA1 / Q138Z2 / B3QCX5 / Q6N858	Rhodopseudomonas palustris / Rhodopseudomonas pseudopalustris / Rhodopseudomonas palustris (strain BisB5) / Rhodopseudomonas palustris (strain TIE-1) / Rhodopseudomonas palustris (strain ATCC BAA-98 / CGA009)	1.0774	0.812429	10743.6	11758.4	1.09446	0.702152
Chlorophyllide reductase subunit Z (EC 1.3.7.15) (Chlorin reductase subunit Z)	tr|A0A418V3F4|A0A418V3F4_RHOPL	A0A418V3F4	Rhodopseudomonas palustris	0.9236	0.787216	15223.1	13460.7	0.884224	0.628045
(R)-citramalate synthase (EC 2.3.3.21)	tr|A0A2R4GT05|A0A2R4GT05_RHOPL	A0A2R4GT05	Rhodopseudomonas palustris	0.6908	0.185967	11301.5	9434.06	0.834761	0.332727
Flagellin	tr|A0A418VKE1|A0A418VKE1_RHOPL	A0A418VKE1	Rhodopseudomonas palustris	0.8998	0.709425	66836.7	59911.3	0.896383	0.387235
Nitrogen regulatory protein	tr|A0A0D7F7T4|A0A0D7F7T4_RHOPL	A0A0D7F7T4	Rhodopseudomonas palustris	1.6309	0.1173	13390.2	21145.4	1.57917	0.0735096
D-3-phosphoglycerate dehydrogenase (EC 1.1.1.95)	tr|A0A323UAY5|A0A323UAY5_RHOPL	A0A323UAY5	Rhodopseudomonas palustris	0.755	0.370628	77733.4	57085.8	0.734379	0.0790393
phosphoserine transaminase (EC 2.6.1.52)	tr|A0A0D7EF82|A0A0D7EF82_RHOPL	A0A0D7EF82	Rhodopseudomonas palustris	0.7515	0.324382	82314.3	60718.2	0.737639	0.0441063
Outer membrane protein assembly factor BamA	tr|A0A0D7EJM9|A0A0D7EJM9_RHOPL	A0A0D7EJM9	Rhodopseudomonas palustris	0.5896	0.346962	1634.63	939.918	0.575004	0.179857
Ribulose 1,5-bisphosphate carboxylase	tr|A0A418VIK3|A0A418VIK3_RHOPL	A0A418VIK3	Rhodopseudomonas palustris	0.6981	0.250137	7735.73	6035.4	0.780198	0.0326622
Carbamoyl-phosphate synthase large chain (EC 6.3.5.5) (Carbamoyl-phosphate synthetase ammonia chain)	tr|A0A0D7EFL5|A0A0D7EFL5_RHOPL	A0A0D7EFL5	Rhodopseudomonas palustris	0.9853	0.941649	18449.3	18733.7	1.01541	0.909155
Channel protein TolC	tr|A0A0D7EFV0|A0A0D7EFV0_RHOPL	A0A0D7EFV0	Rhodopseudomonas palustris	0.8247	0.86547	10142	8903.52	0.877886	0.69979
Chaperone protein ClpB	tr|A0A418UX46|A0A418UX46_RHOPL	A0A418UX46	Rhodopseudomonas palustris	1.6224	0.0379575	7181.22	11307.1	1.57454	0.00940758
Aldehyde dehydrogenase family protein	tr|A0A418VCU5|A0A418VCU5_RHOPL	A0A418VCU5	Rhodopseudomonas palustris	1.5441	0.103716	16346.4	25444.2	1.55656	0.0134395
Phosphomethylpyrimidine synthase (EC 4.1.99.17) (Hydroxymethylpyrimidine phosphate synthase) (HMP-P synthase) (HMP-phosphate synthase) (HMPP synthase) (Thiamine biosynthesis protein ThiC)	tr|A0A418VFZ6|A0A418VFZ6_RHOPL	A0A418VFZ6	Rhodopseudomonas palustris	0.309	0.0131842	6210.44	2962.7	0.477052	0.00590723
Ribulose bisphosphate carboxylase small subunit (RuBisCO small subunit)	tr|A0A2R4GWR5|A0A2R4GWR5_RHOPL	A0A2R4GWR5	Rhodopseudomonas palustris	1.8141	0.0531149	1.39081e+06	2.65513e+06	1.90905	0.0384191
Adenosylhomocysteinase (EC 3.3.1.1) (S-adenosyl-L-homocysteine hydrolase) (AdoHcyase)	tr|A0A0D7EFF8|A0A0D7EFF8_RHOPL	A0A0D7EFF8	Rhodopseudomonas palustris	0.9001	0.746225	47854.7	41929.7	0.876187	0.378527
Transketolase (EC 2.2.1.1)	tr|A0A0D7EDM2|A0A0D7EDM2_RHOPL	A0A0D7EDM2	Rhodopseudomonas palustris	0.87	0.529029	70529.3	60799.1	0.862041	0.0502234
Enoyl-CoA hydratase (EC 4.2.1.17)	tr|A0A0D7E6U6|A0A0D7E6U6_RHOPL	A0A0D7E6U6	Rhodopseudomonas palustris	2.4475	0.0251731	3297.68	7089.08	2.14972	0.0150999
Ferrochelatase (EC 4.98.1.1) (Heme synthase) (Protoheme ferro-lyase)_x000D_ Ferrochelatase (EC 4.98.1.1) (Heme synthase) (Protoheme ferro-lyase)_x000D_ Ferrochelatase (EC 4.98.1.1) (Heme synthase) (Protoheme ferro-lyase)	tr|A0A418V352|A0A418V352_RHOPL / tr|A0A0N1BXC5|A0A0N1BXC5_9BRAD / sp|Q2IRD5|HEMH_RHOP2	A0A418V352 / A0A0N1BXC5 / Q2IRD5	Rhodopseudomonas palustris / Rhodopseudomonas sp. AAP120 / Rhodopseudomonas palustris (strain HaA2)	0.5567	0.0590275	7739.31	8636.78	1.11596	0.672177
Nitrogenase protein alpha chain (EC 1.18.6.1)	tr|A0A0D7EER3|A0A0D7EER3_RHOPL	A0A0D7EER3	Rhodopseudomonas palustris	1.2977	0.282605	4014.63	4987.54	1.24234	0.522538
Glycine--tRNA ligase beta subunit (EC 6.1.1.14) (Glycyl-tRNA synthetase beta subunit) (GlyRS)_x000D_ Glycine--tRNA ligase beta subunit (EC 6.1.1.14) (Glycyl-tRNA synthetase beta subunit) (GlyRS)	tr|A0A2R4GQ97|A0A2R4GQ97_RHOPL / tr|A0A323UC60|A0A323UC60_RHOPL	A0A2R4GQ97 / A0A323UC60	Rhodopseudomonas palustris	0.9065	0.690411	8963.67	7995.84	0.892027	0.413222
Branched-chain-amino-acid aminotransferase (EC 2.6.1.42)	tr|A0A0D7DZC6|A0A0D7DZC6_RHOPL	A0A0D7DZC6	Rhodopseudomonas palustris	0.8341	0.639879	9294.91	8325.58	0.895714	0.592033
Oxidoreductase	tr|A0A2R4GQW2|A0A2R4GQW2_RHOPL	A0A2R4GQW2	Rhodopseudomonas palustris	1.3008	0.183133	10045.7	13208.3	1.31482	0.123091
Xanthine dehydrogenase family protein molybdopterin-binding subunit	tr|A0A418UXH3|A0A418UXH3_RHOPL	A0A418UXH3	Rhodopseudomonas palustris	1.1441	0.559667	3921.46	4642.05	1.18375	0.203771
Chaperone protein ClpB	tr|A0A0D7F3V8|A0A0D7F3V8_RHOPL	A0A0D7F3V8	Rhodopseudomonas palustris	1.5291	0.0585008	6445.04	9600.47	1.48959	0.00915202
Isocitrate lyase (EC 4.1.3.1) (Isocitrase) (Isocitratase)	tr|A0A323UAS4|A0A323UAS4_RHOPL	A0A323UAS4	Rhodopseudomonas palustris	0.4011	0.0185938	117399	47775.8	0.406953	0.000464809
Nucleoside diphosphate kinase (NDK) (NDP kinase) (EC 2.7.4.6) (Nucleoside-2-P kinase)_x000D_ Nucleoside diphosphate kinase (NDK) (NDP kinase) (EC 2.7.4.6) (Nucleoside-2-P kinase)_x000D_ Nucleoside diphosphate kinase (NDK) (NDP kinase) (EC 2.7.4.6) (Nucleoside-2-P kinase)_x000D_ Nucleoside diphosphate kinase (NDK) (NDP kinase) (EC 2.7.4.6) (Nucleoside-2-P kinase)_x000D_ Nucleoside diphosphate kina…	tr|A0A2R4GW19|A0A2R4GW19_RHOPL / tr|A0A418VQH3|A0A418VQH3_RHOPL / tr|A0A1H8WGH6|A0A1H8WGH6_9BRAD / tr|A0A0N1C5Z2|A0A0N1C5Z2_9BRAD / sp|Q135Q2|NDK_RHOPS / sp|Q2IX70|NDK_RHOP2 / sp|B3Q9R4|NDK_RHOPT / sp|Q6N5C3|NDK_RHOPA	A0A2R4GW19 / A0A418VQH3 / A0A1H8WGH6 / A0A0N1C5Z2 / Q135Q2 / Q2IX70 / B3Q9R4 / Q6N5C3	Rhodopseudomonas palustris / Rhodopseudomonas palustris / Rhodopseudomonas pseudopalustris / Rhodopseudomonas sp. AAP120 / Rhodopseudomonas palustris (strain BisB5) / Rhodopseudomonas palustris (strain HaA2) / Rhodopseudomonas palustris (strain TIE-1) / Rhodopseudomonas palustris (strain ATCC BAA-98 / CGA009)	1.0057	0.980366	146164	144878	0.991198	0.903487
Nucleoside diphosphate kinase (NDK) (NDP kinase) (EC 2.7.4.6) (Nucleoside-2-P kinase)	tr|A0A323UWW6|A0A323UWW6_RHOPL	A0A323UWW6	Rhodopseudomonas palustris	1.0505	0.839714	110314	114081	1.03415	0.677942
Argininosuccinate synthase (EC 6.3.4.5) (Citrulline--aspartate ligase)	tr|A0A418VM34|A0A418VM34_RHOPL	A0A418VM34	Rhodopseudomonas palustris	1.1644	0.569367	12701.6	14520.1	1.14317	0.161572
Fumarate hydratase class I (EC 4.2.1.2)_x000D_ Fumarate hydratase class I (EC 4.2.1.2)	tr|A0A323U8Y8|A0A323U8Y8_RHOPL / tr|A0A2R4GYB9|A0A2R4GYB9_RHOPL	A0A323U8Y8 / A0A2R4GYB9	Rhodopseudomonas palustris	0.8936	0.608127	14423.8	13029.3	0.903323	0.157748
Acyl-CoA dehydrogenase	tr|A0A0D7E9A9|A0A0D7E9A9_RHOPL	A0A0D7E9A9	Rhodopseudomonas palustris	2.3525	0.0190116	17293.7	39779	2.3002	0.000300364
Periplasmic serine endoprotease DegP-like (EC 3.4.21.107)	tr|A0A2R4GSL9|A0A2R4GSL9_RHOPL	A0A2R4GSL9	Rhodopseudomonas palustris	6.0966	0.0031345	13584.7	92878.2	6.83696	0.0162515
50S ribosomal protein L5_x000D_ 50S ribosomal protein L5	tr|A0A0D7EMC4|A0A0D7EMC4_RHOPL / sp|Q211G0|RL5_RHOPB	A0A0D7EMC4 / Q211G0	Rhodopseudomonas palustris / Rhodopseudomonas palustris (strain BisB18)	0.8143	0.499638	75806	58935.6	0.777452	0.112393
CoA transferase subunit A_x000D_ Succinyl-CoA--3-ketoacid-CoA transferase	tr|A0A418V3Q8|A0A418V3Q8_RHOPL / tr|A0A0N1LVH7|A0A0N1LVH7_9BRAD	A0A418V3Q8 / A0A0N1LVH7	Rhodopseudomonas palustris / Rhodopseudomonas sp. AAP120	1.1701	0.66441	6324.78	9366.42	1.48091	0.42506
30S ribosomal protein S8_x000D_ 30S ribosomal protein S8_x000D_ 30S ribosomal protein S8_x000D_ 30S ribosomal protein S8_x000D_ 30S ribosomal protein S8_x000D_ 30S ribosomal protein S8_x000D_ 30S ribosomal protein S8_x000D_ 30S ribosomal protein S8_x000D_ 30S ribosomal protein S8 (RRP-S8)	tr|A0A2R4GWI7|A0A2R4GWI7_RHOPL / tr|A0A323UJE9|A0A323UJE9_RHOPL / tr|A0A336JME3|A0A336JME3_9BRAD / tr|E6VBX0|E6VBX0_RHOPX / tr|A0A1H8VDD1|A0A1H8VDD1_9BRAD / sp|Q2IXP6|RS8_RHOP2 / sp|B3QBW6|RS8_RHOPT / sp|Q134U3|RS8_RHOPS / sp|Q6N4U7|RS8_RHOPA	A0A2R4GWI7 / A0A323UJE9 / A0A336JME3 / E6VBX0 / A0A1H8VDD1 / Q2IXP6 / B3QBW6 / Q134U3 / Q6N4U7	Rhodopseudomonas palustris / Rhodopseudomonas palustris / Rhodopseudomonas pentothenatexigens / Rhodopseudomonas palustris (strain DX-1) / Rhodopseudomonas pseudopalustris / Rhodopseudomonas palustris (strain HaA2) / Rhodopseudomonas palustris (strain TIE-1) / Rhodopseudomonas palustris (strain BisB5) / Rhodopseudomonas palustris (strain ATCC BAA-98 / CGA009)	0.886	0.585543	105568	92717.9	0.878276	0.184424
Ketol-acid reductoisomerase (NADP(+)) (KARI) (EC 1.1.1.86) (Acetohydroxy-acid isomeroreductase) (AHIR) (Alpha-keto-beta-hydroxylacyl reductoisomerase)_x000D_ Ketol-acid reductoisomerase (NADP(+)) (KARI) (EC 1.1.1.86) (Acetohydroxy-acid isomeroreductase) (AHIR) (Alpha-keto-beta-hydroxylacyl reductoisomerase)_x000D_ Ketol-acid reductoisomerase (NADP(+)) (KARI) (EC 1.1.1.86) (Acetohydroxy-acid isome…	tr|A0A323UNE8|A0A323UNE8_RHOPL / tr|A0A2R4GSY9|A0A2R4GSY9_RHOPL / tr|A0A336JR89|A0A336JR89_9BRAD	A0A323UNE8 / A0A2R4GSY9 / A0A336JR89	Rhodopseudomonas palustris / Rhodopseudomonas palustris / Rhodopseudomonas pentothenatexigens	1.2305	0.413525	84942.8	104210	1.22683	0.0704769
Bacterioferritin (EC 1.16.3.1)	tr|A0A0D7EY91|A0A0D7EY91_RHOPL	A0A0D7EY91	Rhodopseudomonas palustris	2.7964	0.010547	21600.4	59836.8	2.77017	0.00534129
Chaperone protein ClpB	tr|A0A418VQU7|A0A418VQU7_RHOPL	A0A418VQU7	Rhodopseudomonas palustris	1.5132	0.0670158	8709.08	12825.8	1.47269	0.00987258
Indolepyruvate oxidoreductase subunit IorA (IOR) (EC 1.2.7.8) (Indolepyruvate ferredoxin oxidoreductase subunit alpha)	tr|A0A323UCA2|A0A323UCA2_RHOPL	A0A323UCA2	Rhodopseudomonas palustris	0.5681	0.113306	10783.5	7531.94	0.698472	0.0681923
3-oxoacyl-[acyl-carrier-protein] reductase (EC 1.1.1.100)	tr|A0A2R4GW17|A0A2R4GW17_RHOPL	A0A2R4GW17	Rhodopseudomonas palustris	0.8512	0.562154	26557.4	22287.3	0.83921	0.158668
Histidine kinase	tr|A0A418UXW0|A0A418UXW0_RHOPL	A0A418UXW0	Rhodopseudomonas palustris	0.8652	0.453726	8580.52	7200.46	0.839164	0.355561
Orotidine 5'-phosphate decarboxylase (EC 4.1.1.23) (OMP decarboxylase) (OMPDCase) (OMPdecase)_x000D_ Orotidine 5'-phosphate decarboxylase (EC 4.1.1.23) (OMP decarboxylase) (OMPDCase) (OMPdecase)	tr|A0A2R4GN88|A0A2R4GN88_RHOPL / tr|A0A336JVU2|A0A336JVU2_9BRAD	A0A2R4GN88 / A0A336JVU2	Rhodopseudomonas palustris / Rhodopseudomonas pentothenatexigens	0.7964	0.431642	8335.45	6661.12	0.799132	0.0574149
Phenylalanine--tRNA ligase beta subunit (EC 6.1.1.20) (Phenylalanyl-tRNA synthetase beta subunit) (PheRS)	tr|A0A2R4GMC1|A0A2R4GMC1_RHOPL	A0A2R4GMC1	Rhodopseudomonas palustris	0.9159	0.690557	25052.4	22638.6	0.903647	0.242507
Methylthioribose-1-phosphate isomerase (M1Pi) (MTR-1-P isomerase) (EC 5.3.1.23) (S-methyl-5-thioribose-1-phosphate isomerase)	tr|A0A0D7F2C8|A0A0D7F2C8_RHOPL	A0A0D7F2C8	Rhodopseudomonas palustris	0.7513	0.274388	27746.3	20556.2	0.740863	0.0522618
Acyl-CoA dehydrogenase	tr|A0A0D7ET44|A0A0D7ET44_RHOPL	A0A0D7ET44	Rhodopseudomonas palustris	0.8062	0.334968	36173	28692.3	0.793197	0.0210917
Aminotransferase (EC 2.6.1.-)	tr|A0A0D7EK17|A0A0D7EK17_RHOPL	A0A0D7EK17	Rhodopseudomonas palustris	1.0292	0.902963	43100.9	44033.1	1.02163	0.6322
Alpha-2-macroglobulin	tr|A0A0D7F3W5|A0A0D7F3W5_RHOPL	A0A0D7F3W5	Rhodopseudomonas palustris	1.315	0.382674	3924.77	3914.55	0.997395	0.993816
Translation initiation factor IF-2_x000D_ Translation initiation factor IF-2_x000D_ Translation initiation factor IF-2	tr|A0A418VIN3|A0A418VIN3_RHOPL / tr|A0A1H8MM26|A0A1H8MM26_9BRAD / sp|Q13EL8|IF2_RHOPS	A0A418VIN3 / A0A1H8MM26 / Q13EL8	Rhodopseudomonas palustris / Rhodopseudomonas pseudopalustris / Rhodopseudomonas palustris (strain BisB5)	0.8074	0.417303	25821.9	20694.7	0.801441	0.0343422
Tryptophanase	tr|A0A0D7EHA1|A0A0D7EHA1_RHOPL	A0A0D7EHA1	Rhodopseudomonas palustris	0.6981	0.398829	12253.6	8376.97	0.683633	0.161648
Glutamine--tRNA ligase (EC 6.1.1.18) (Glutaminyl-tRNA synthetase) (GlnRS)	tr|A0A0D7EJZ4|A0A0D7EJZ4_RHOPL	A0A0D7EJZ4	Rhodopseudomonas palustris	0.9613	0.864123	8988.72	8530.85	0.949062	0.498691
Ribonuclease activity regulator RraA_x000D_ Regulator of RNase E activity RraA	tr|A0A323UP79|A0A323UP79_RHOPL / tr|A0A336JNU5|A0A336JNU5_9BRAD	A0A323UP79 / A0A336JNU5	Rhodopseudomonas palustris / Rhodopseudomonas pentothenatexigens	1.1651	0.51369	10551.3	12166.8	1.15311	0.224129
50S ribosomal protein L15	tr|A0A418V481|A0A418V481_RHOPL	A0A418V481	Rhodopseudomonas palustris	0.759	0.333426	80232.2	59930.7	0.746965	0.0272249
S41 family peptidase	tr|A0A418VDI2|A0A418VDI2_RHOPL	A0A418VDI2	Rhodopseudomonas palustris	0.6509	0.129491	22352.8	14918.3	0.667401	0.00439886
Aldedh domain-containing protein	tr|A0A2R4GNH0|A0A2R4GNH0_RHOPL	A0A2R4GNH0	Rhodopseudomonas palustris	1.6364	0.0511856	14642.3	23809	1.62604	0.000625788
ABC transporter substrate-binding protein	tr|A0A0D7EMH3|A0A0D7EMH3_RHOPL	A0A0D7EMH3	Rhodopseudomonas palustris	1.1967	0.435029	9777	11727.1	1.19945	0.0824048
Bifunctional purine biosynthesis protein PurH [Includes: Phosphoribosylaminoimidazolecarboxamide formyltransferase (EC 2.1.2.3) (AICAR transformylase); IMP cyclohydrolase (EC 3.5.4.10) (ATIC) (IMP synthase) (Inosinicase)]	tr|A0A418VM15|A0A418VM15_RHOPL	A0A418VM15	Rhodopseudomonas palustris	0.9849	0.948621	36671.6	35681.4	0.972997	0.724988
Membrane protein	tr|A0A0D7E9R0|A0A0D7E9R0_RHOPL	A0A0D7E9R0	Rhodopseudomonas palustris	1.1003	0.694128	30367.7	31344.8	1.03217	0.793714
Glyceraldehyde-3-phosphate dehydrogenase (EC 1.2.1.12)	tr|A0A0D7ETM5|A0A0D7ETM5_RHOPL	A0A0D7ETM5	Rhodopseudomonas palustris	1.7419	0.0126662	144282	253075	1.75403	0.00530361
phosphoenolpyruvate carboxykinase (ATP) (EC 4.1.1.49)	tr|A0A0D7DXW8|A0A0D7DXW8_RHOPL	A0A0D7DXW8	Rhodopseudomonas palustris	0.6937	0.188266	82595.1	56618.3	0.685492	0.00578839
ATP-dependent protease ATPase subunit HslU (Unfoldase HslU)	tr|A0A418VI93|A0A418VI93_RHOPL	A0A418VI93	Rhodopseudomonas palustris	1.153	0.459877	16336.4	18896.3	1.1567	0.0948884
50S ribosomal protein L21	tr|A0A0D7ERW1|A0A0D7ERW1_RHOPL	A0A0D7ERW1	Rhodopseudomonas palustris	0.7456	0.621562	127006	85652	0.674393	0.25434
Chaperone protein HtpG (Heat shock protein HtpG) (High temperature protein G)	tr|A0A2R4H183|A0A2R4H183_RHOPL	A0A2R4H183	Rhodopseudomonas palustris	1.0766	0.839979	25818.8	20628.7	0.79898	0.235678
Glutamine--tRNA ligase (EC 6.1.1.18) (Glutaminyl-tRNA synthetase) (GlnRS)	tr|A0A2R4GVK4|A0A2R4GVK4_RHOPL	A0A2R4GVK4	Rhodopseudomonas palustris	1.037	0.862404	10978.4	11220.1	1.02201	0.736712
NAD(P) transhydrogenase subunit alpha	tr|A0A0D7EJH5|A0A0D7EJH5_RHOPL	A0A0D7EJH5	Rhodopseudomonas palustris	1.0463	0.840034	296897	308699	1.03975	0.610878
50S ribosomal protein L7/L12	tr|A0A0D7EIZ8|A0A0D7EIZ8_RHOPL	A0A0D7EIZ8	Rhodopseudomonas palustris	0.677	0.592349	60066.4	39090.7	0.650792	0.354144
Methylmalonyl-CoA carboxyltransferase	tr|A0A0D7E2Q1|A0A0D7E2Q1_RHOPL	A0A0D7E2Q1	Rhodopseudomonas palustris	0.6941	0.154258	38007.3	26075	0.686052	0.00253479
Co-chaperonin GroES (10 kDa chaperonin) (Chaperonin-10) (Cpn10)	tr|A0A0D7DW93|A0A0D7DW93_RHOPL	A0A0D7DW93	Rhodopseudomonas palustris	0.6615	0.284064	193242	129202	0.668604	0.15069
Carbamoyl-phosphate synthase large chain (EC 6.3.5.5) (Carbamoyl-phosphate synthetase ammonia chain)	tr|A0A323ULC2|A0A323ULC2_RHOPL	A0A323ULC2	Rhodopseudomonas palustris	1.1233	0.400423	20147.1	22920.5	1.13766	0.476499
Carbohydrate kinase	tr|A0A0D7EI87|A0A0D7EI87_RHOPL	A0A0D7EI87	Rhodopseudomonas palustris	0.8799	0.436224	5883.27	5192.01	0.882505	0.431752
Phospho-2-dehydro-3-deoxyheptonate aldolase (EC 2.5.1.54)	tr|A0A0D7EAG5|A0A0D7EAG5_RHOPL	A0A0D7EAG5	Rhodopseudomonas palustris	0.2961	0.174014	3382.19	3544.34	1.04794	0.852128
Acetyl-coenzyme A carboxylase carboxyl transferase subunit alpha (ACCase subunit alpha) (Acetyl-CoA carboxylase carboxyltransferase subunit alpha) (EC 2.1.3.15)_x000D_ Acetyl-coenzyme A carboxylase carboxyl transferase subunit alpha (ACCase subunit alpha) (Acetyl-CoA carboxylase carboxyltransferase subunit alpha) (EC 2.1.3.15)	tr|A0A336JWD7|A0A336JWD7_9BRAD / tr|E6VKQ0|E6VKQ0_RHOPX	A0A336JWD7 / E6VKQ0	Rhodopseudomonas pentothenatexigens / Rhodopseudomonas palustris (strain DX-1)	0.7442	0.360129	7986.22	5750.8	0.72009	0.0850094
Nitrogenase molybdenum-iron protein beta chain (EC 1.18.6.1) (Dinitrogenase)_x000D_ Nitrogenase molybdenum-iron protein beta chain (EC 1.18.6.1) (Dinitrogenase)	tr|A0A336JTB4|A0A336JTB4_9BRAD / tr|A0A2R4H0B8|A0A2R4H0B8_RHOPL	A0A336JTB4 / A0A2R4H0B8	Rhodopseudomonas pentothenatexigens / Rhodopseudomonas palustris	1.1756	0.575741	5792.88	7038.51	1.21503	0.526039
Protein translocase subunit SecA (EC 7.4.2.8)	tr|A0A2R4GNQ7|A0A2R4GNQ7_RHOPL	A0A2R4GNQ7	Rhodopseudomonas palustris	1.0261	0.905215	14367	14766	1.02778	0.692442
Acyl-CoA dehydrogenase	tr|A0A0D7F2I7|A0A0D7F2I7_RHOPL	A0A0D7F2I7	Rhodopseudomonas palustris	1.2626	0.272204	7613.87	10327.8	1.35645	0.0143832
Glutamine--tRNA ligase (EC 6.1.1.18) (Glutaminyl-tRNA synthetase) (GlnRS)_x000D_ Glutamine--tRNA ligase (EC 6.1.1.18) (Glutaminyl-tRNA synthetase) (GlnRS)	tr|A0A418V2Q3|A0A418V2Q3_RHOPL / tr|A0A336JSC6|A0A336JSC6_9BRAD	A0A418V2Q3 / A0A336JSC6	Rhodopseudomonas palustris / Rhodopseudomonas pentothenatexigens	1.0229	0.914435	9605.43	9714.81	1.01139	0.865426
Cysteine--tRNA ligase (EC 6.1.1.16) (Cysteinyl-tRNA synthetase) (CysRS)_x000D_ Cysteine--tRNA ligase (EC 6.1.1.16) (Cysteinyl-tRNA synthetase) (CysRS)	tr|A0A323UJT4|A0A323UJT4_RHOPL / sp|B3QCS4|SYC_RHOPT	A0A323UJT4 / B3QCS4	Rhodopseudomonas palustris / Rhodopseudomonas palustris (strain TIE-1)	1.169	0.501138	3814.68	4420.56	1.15883	0.0576977
Carbamoyl-phosphate synthase large chain (EC 6.3.5.5) (Carbamoyl-phosphate synthetase ammonia chain)	tr|A0A2R4GZM0|A0A2R4GZM0_RHOPL	A0A2R4GZM0	Rhodopseudomonas palustris	0.9641	0.84533	18907.4	18825.1	0.995644	0.974263
Nitrogenase molybdenum-iron protein beta chain (EC 1.18.6.1) (Dinitrogenase)	tr|A0A323UHG8|A0A323UHG8_RHOPL	A0A323UHG8	Rhodopseudomonas palustris	1.2786	0.376771	4451.71	6010.9	1.35024	0.220088
Blue-light-activated histidine kinase	tr|E6VDH6|E6VDH6_RHOPX	E6VDH6	Rhodopseudomonas palustris (strain DX-1)	0.7892	0.748343	2571.84	2373.58	0.92291	0.780738
Phenylalanine--tRNA ligase beta subunit (EC 6.1.1.20) (Phenylalanyl-tRNA synthetase beta subunit) (PheRS)	tr|E6VF10|E6VF10_RHOPX	E6VF10	Rhodopseudomonas palustris (strain DX-1)	0.9286	0.751153	23310.4	21305.4	0.913983	0.343006
Polyribonucleotide nucleotidyltransferase (EC 2.7.7.8) (Polynucleotide phosphorylase) (PNPase)	tr|E6VH60|E6VH60_RHOPX	E6VH60	Rhodopseudomonas palustris (strain DX-1)	1.0278	0.922861	25920.6	27342.8	1.05487	0.758602
Fructose-1,6-bisphosphatase class 1 (FBPase class 1) (EC 3.1.3.11) (D-fructose-1,6-bisphosphate 1-phosphohydrolase class 1)_x000D_ Fructose-1,6-bisphosphatase class 1 (FBPase class 1) (EC 3.1.3.11) (D-fructose-1,6-bisphosphate 1-phosphohydrolase class 1)	tr|A0A1H8NDE5|A0A1H8NDE5_9BRAD / sp|Q13CA1|F16PA_RHOPS	A0A1H8NDE5 / Q13CA1	Rhodopseudomonas pseudopalustris / Rhodopseudomonas palustris (strain BisB5)	0.7232	0.3166	30760	23352.3	0.759177	0.101475
50S ribosomal protein L7/L12_x000D_ 50S ribosomal protein L7/L12	tr|A0A1H8VEA2|A0A1H8VEA2_9BRAD / sp|Q134R7|RL7_RHOPS	A0A1H8VEA2 / Q134R7	Rhodopseudomonas pseudopalustris / Rhodopseudomonas palustris (strain BisB5)	0.8517	0.539968	360228	296815	0.823966	0.2077
Phosphomethylpyrimidine synthase (EC 4.1.99.17) (Hydroxymethylpyrimidine phosphate synthase) (HMP-P synthase) (HMP-phosphate synthase) (HMPP synthase) (Thiamine biosynthesis protein ThiC)	tr|A0A1H8QIR2|A0A1H8QIR2_9BRAD	A0A1H8QIR2	Rhodopseudomonas pseudopalustris	0.3063	0.0150387	6532.62	2888.97	0.442238	0.00223907
von Willebrand factor type A domain-containing protein	tr|A0A1H8ULD5|A0A1H8ULD5_9BRAD	A0A1H8ULD5	Rhodopseudomonas pseudopalustris	1.6304	0.246577	46140.8	70606.5	1.53024	0.0471057
Protein GrpE (HSP-70 cofactor)_x000D_ Protein GrpE (HSP-70 cofactor)_x000D_ Protein GrpE (HSP-70 cofactor)_x000D_ Protein GrpE (HSP-70 cofactor)	tr|A0A1H8X5L7|A0A1H8X5L7_9BRAD / sp|Q2J322|GRPE_RHOP2 / sp|Q07US4|GRPE_RHOP5 / sp|Q13E58|GRPE_RHOPS	A0A1H8X5L7 / Q2J322 / Q07US4 / Q13E58	Rhodopseudomonas pseudopalustris / Rhodopseudomonas palustris (strain HaA2) / Rhodopseudomonas palustris (strain BisA53) / Rhodopseudomonas palustris (strain BisB5)	1.4476	0.134501	102463	147675	1.44125	0.0436496
Chaperonin GroEL (EC 5.6.1.7) (60 kDa chaperonin) (Chaperonin-60) (Cpn60)_x000D_ Chaperonin GroEL 1 (EC 5.6.1.7) (60 kDa chaperonin 1) (Chaperonin-60 1) (Cpn60 1)	tr|A0A1H8VUG6|A0A1H8VUG6_9BRAD / sp|Q138M7|CH601_RHOPS	A0A1H8VUG6 / Q138M7	Rhodopseudomonas pseudopalustris / Rhodopseudomonas palustris (strain BisB5)	0.9155	0.670759	294747	269643	0.914829	0.497627
Bacterioferritin (EC 1.16.3.1)	tr|A0A1H8QJL9|A0A1H8QJL9_9BRAD	A0A1H8QJL9	Rhodopseudomonas pseudopalustris	3.5997	0.00843171	18395.3	62957.3	3.42246	0.0037217
Oligoendopeptidase F	tr|A0A1H8P6C3|A0A1H8P6C3_9BRAD	A0A1H8P6C3	Rhodopseudomonas pseudopalustris	0.8817	0.68835	14588.4	13552.6	0.929001	0.506872
Elongation factor G (EF-G)_x000D_ Elongation factor G (EF-G)	tr|A0A1H8VDH8|A0A1H8VDH8_9BRAD / sp|Q134S6|EFG_RHOPS	A0A1H8VDH8 / Q134S6	Rhodopseudomonas pseudopalustris / Rhodopseudomonas palustris (strain BisB5)	0.8788	0.604248	57437.7	49905.7	0.868866	0.160411
DNA gyrase subunit B (EC 5.6.2.2)	tr|A0A1H8M6X1|A0A1H8M6X1_9BRAD	A0A1H8M6X1	Rhodopseudomonas pseudopalustris	0.7914	0.358649	6255.09	4932.4	0.788541	0.0109002
Chaperone protein HtpG (Heat shock protein HtpG) (High temperature protein G)	sp|Q07GW8|HTPG_RHOP5	Q07GW8	Rhodopseudomonas palustris (strain BisA53)	1.2781	0.29272	25507.4	34018	1.33365	0.1008
Ferredoxin--NADP reductase (FNR) (Fd-NADP(+) reductase) (EC 1.18.1.2)	sp|Q07RK6|FENR_RHOP5	Q07RK6	Rhodopseudomonas palustris (strain BisA53)	0.7956	0.658338	16302.9	14451	0.886408	0.68943
Translation initiation factor IF-2	sp|Q07V78|IF2_RHOP5	Q07V78	Rhodopseudomonas palustris (strain BisA53)	0.8011	0.372023	26699.8	21315.2	0.798329	0.0222279
Ribose-5-phosphate isomerase A (EC 5.3.1.6) (Phosphoriboisomerase A) (PRI)	sp|Q2IUM8|RPIA_RHOP2	Q2IUM8	Rhodopseudomonas palustris (strain HaA2)	0.7646	0.470133	15611.6	11596.2	0.742794	0.150786
50S ribosomal protein L2	sp|Q211F1|RL2_RHOPB	Q211F1	Rhodopseudomonas palustris (strain BisB18)	0.8237	0.505121	94582.9	76278.4	0.806471	0.0967643
Polyribonucleotide nucleotidyltransferase (EC 2.7.7.8) (Polynucleotide phosphorylase) (PNPase)	sp|Q07V82|PNP_RHOP5	Q07V82	Rhodopseudomonas palustris (strain BisA53)	1.0465	0.871301	38517.3	40775.2	1.05862	0.710462
UDP-N-acetylglucosamine--N-acetylmuramyl-(pentapeptide) pyrophosphoryl-undecaprenol N-acetylglucosamine transferase (EC 2.4.1.227) (Undecaprenyl-PP-MurNAc-pentapeptide-UDPGlcNAc GlcNAc transferase)	sp|Q07PT3|MURG_RHOP5	Q07PT3	Rhodopseudomonas palustris (strain BisA53)	1.2781	0.235767	5368.18	6717.15	1.25129	0.227526
Polyphosphate kinase (EC 2.7.4.1) (ATP-polyphosphate phosphotransferase) (Polyphosphoric acid kinase)	sp|Q2IX63|PPK1_RHOP2	Q2IX63	Rhodopseudomonas palustris (strain HaA2)	2.4936	0.00983883	8809.72	20232.2	2.29658	0.000154273
Catalase-peroxidase (CP) (EC 1.11.1.21) (Peroxidase/catalase)	sp|Q2J2I9|KATG_RHOP2	Q2J2I9	Rhodopseudomonas palustris (strain HaA2)	1.7763	0.0964971	12579.4	20705.7	1.64601	0.00849026
Acetyl-coenzyme A carboxylase carboxyl transferase subunit alpha (ACCase subunit alpha) (Acetyl-CoA carboxylase carboxyltransferase subunit alpha) (EC 2.1.3.15)	sp|Q07VD3|ACCA_RHOP5	Q07VD3	Rhodopseudomonas palustris (strain BisA53)	0.7597	0.333094	9887.88	7334.87	0.741804	0.0833173
Enolase (EC 4.2.1.11) (2-phospho-D-glycerate hydro-lyase) (2-phosphoglycerate dehydratase)	sp|Q07ND9|ENO_RHOP5	Q07ND9	Rhodopseudomonas palustris (strain BisA53)	1.0375	0.890744	41166.2	42205.9	1.02526	0.823523
Chaperone protein HtpG (Heat shock protein HtpG) (High temperature protein G)	sp|Q20WN5|HTPG_RHOPB	Q20WN5	Rhodopseudomonas palustris (strain BisB18)	1.028	0.935444	23889.1	20045.3	0.8391	0.338662
Translation initiation factor IF-2	sp|Q21C31|IF2_RHOPB	Q21C31	Rhodopseudomonas palustris (strain BisB18)	0.8151	0.36299	23048.9	18672.4	0.810124	0.000364559
Ketol-acid reductoisomerase (NADP(+)) (KARI) (EC 1.1.1.86) (Acetohydroxy-acid isomeroreductase) (AHIR) (Alpha-keto-beta-hydroxylacyl reductoisomerase) (Ketol-acid reductoisomerase type 1) (Ketol-acid reductoisomerase type I)	sp|Q07PJ7|ILVC_RHOP5	Q07PJ7	Rhodopseudomonas palustris (strain BisA53)	1.1295	0.723124	91780.6	105475	1.14921	0.362246
Ketol-acid reductoisomerase (NADP(+)) (KARI) (EC 1.1.1.86) (Acetohydroxy-acid isomeroreductase) (AHIR) (Alpha-keto-beta-hydroxylacyl reductoisomerase) (Ketol-acid reductoisomerase type 1) (Ketol-acid reductoisomerase type I)_x000D_ Ketol-acid reductoisomerase (NADP(+)) (KARI) (EC 1.1.1.86) (Acetohydroxy-acid isomeroreductase) (AHIR) (Alpha-keto-beta-hydroxylacyl reductoisomerase) (Ketol-acid redu…	sp|Q6N869|ILVC_RHOPA / sp|B3QCW2|ILVC_RHOPT	Q6N869 / B3QCW2	Rhodopseudomonas palustris (strain ATCC BAA-98 / CGA009) / Rhodopseudomonas palustris (strain TIE-1)	1.1756	0.557667	128267	150332	1.17203	0.178341
50S ribosomal protein L13	sp|Q2IWN7|RL13_RHOP2	Q2IWN7	Rhodopseudomonas palustris (strain HaA2)	0.821	0.417669	42260.2	34460.7	0.815441	0.10522
Phosphoenolpyruvate carboxykinase (ATP) (PCK) (PEP carboxykinase) (PEPCK) (EC 4.1.1.49)	sp|Q21BR2|PCKA_RHOPB	Q21BR2	Rhodopseudomonas palustris (strain BisB18)	0.7463	0.27994	74971.3	55496.1	0.740231	0.0275031
50S ribosomal protein L17	sp|Q07KP3|RL17_RHOP5	Q07KP3	Rhodopseudomonas palustris (strain BisA53)	0.8078	0.378024	20939.3	16872.5	0.805782	0.00262541
DNA-directed RNA polymerase subunit beta' (RNAP subunit beta') (EC 2.7.7.6) (RNA polymerase subunit beta') (Transcriptase subunit beta')	sp|Q2IXR9|RPOC_RHOP2	Q2IXR9	Rhodopseudomonas palustris (strain HaA2)	0.8671	0.576562	31977.7	27412.6	0.857241	0.0894464
Aspartyl/glutamyl-tRNA(Asn/Gln) amidotransferase subunit B (Asp/Glu-ADT subunit B) (EC 6.3.5.-)	sp|Q07L96|GATB_RHOP5	Q07L96	Rhodopseudomonas palustris (strain BisA53)	0.9426	0.797642	5713.97	6114.01	1.07001	0.676718
Translation initiation factor IF-2	sp|Q2J2J9|IF2_RHOP2	Q2J2J9	Rhodopseudomonas palustris (strain HaA2)	0.8118	0.391408	22949.6	18517.9	0.806894	0.00799475
Fructose-1,6-bisphosphatase class 1 (FBPase class 1) (EC 3.1.3.11) (D-fructose-1,6-bisphosphate 1-phosphohydrolase class 1)	sp|Q213I9|F16PA_RHOPB	Q213I9	Rhodopseudomonas palustris (strain BisB18)	0.742	0.298612	26227.3	19900.6	0.758775	0.0520756
Fructose-1,6-bisphosphatase class 1 (FBPase class 1) (EC 3.1.3.11) (D-fructose-1,6-bisphosphate 1-phosphohydrolase class 1)	sp|Q07N65|F16PA_RHOP5	Q07N65	Rhodopseudomonas palustris (strain BisA53)	0.7315	0.370097	32207.8	24334.9	0.755557	0.112991
Chaperone protein DnaK (HSP70) (Heat shock 70 kDa protein) (Heat shock protein 70)	sp|Q21CI2|DNAK_RHOPB	Q21CI2	Rhodopseudomonas palustris (strain BisB18)	1.4067	0.153298	58392.3	82732.2	1.41683	0.0459334
50S ribosomal protein L1	sp|Q07KJ8|RL1_RHOP5	Q07KJ8	Rhodopseudomonas palustris (strain BisA53)	0.7257	0.322866	119504	85568	0.71603	0.0909667
Aspartate carbamoyltransferase (EC 2.1.3.2) (Aspartate transcarbamylase) (ATCase)	sp|Q215Y5|PYRB_RHOPB	Q215Y5	Rhodopseudomonas palustris (strain BisB18)	0.8958	0.582862	6994.67	6376.74	0.911656	0.12637
Protein RecA (Recombinase A)	sp|Q9XBC1|RECA_RHOPA	Q9XBC1	Rhodopseudomonas palustris (strain ATCC BAA-98 / CGA009)	0.8939	0.770024	9778.08	8416.99	0.860802	0.726243
Adenine phosphoribosyltransferase (APRT) (EC 2.4.2.7)	sp|Q20Y76|APT_RHOPB	Q20Y76	Rhodopseudomonas palustris (strain BisB18)	0.9636	0.867457	40808.6	38862.4	0.952309	0.604371
Formyl-CoA:oxalate CoA-transferase (FCOCT) (EC 2.8.3.16) (Formyl-coenzyme A transferase) (Formyl-CoA transferase)	sp|Q217M3|FCTA_RHOPB	Q217M3	Rhodopseudomonas palustris (strain BisB18)	2.7522	0.00211901	3089.5	8391.53	2.71615	0.000451802
Aspartyl/glutamyl-tRNA(Asn/Gln) amidotransferase subunit B (Asp/Glu-ADT subunit B) (EC 6.3.5.-)	sp|Q215W3|GATB_RHOPB	Q215W3	Rhodopseudomonas palustris (strain BisB18)	1.0768	0.767585	8251.53	8837.76	1.07105	0.445177
30S ribosomal protein S4	sp|Q218M1|RS4_RHOPB	Q218M1	Rhodopseudomonas palustris (strain BisB18)	0.8461	0.514913	100344	84136.3	0.838483	0.12668
Phosphomethylpyrimidine synthase (EC 4.1.99.17) (Hydroxymethylpyrimidine phosphate synthase) (HMP-P synthase) (HMP-phosphate synthase) (HMPP synthase) (Thiamine biosynthesis protein ThiC)	sp|Q216H0|THIC_RHOPB	Q216H0	Rhodopseudomonas palustris (strain BisB18)	0.3524	0.0102092	8436.08	3818.91	0.452688	0.00239708
Aspartate--tRNA(Asp/Asn) ligase (EC 6.1.1.23) (Aspartyl-tRNA synthetase) (AspRS) (Non-discriminating aspartyl-tRNA synthetase) (ND-AspRS)	sp|Q2IX59|SYDND_RHOP2	Q2IX59	Rhodopseudomonas palustris (strain HaA2)	0.8896	0.622774	14381.4	12671.2	0.881086	0.249482
Alanine--tRNA ligase (EC 6.1.1.7) (Alanyl-tRNA synthetase) (AlaRS)	sp|Q07R87|SYA_RHOP5	Q07R87	Rhodopseudomonas palustris (strain BisA53)	0.8829	0.57364	15277.7	13942.1	0.912578	0.14908
Protein translocase subunit SecA (EC 7.4.2.8)	sp|Q21BY5|SECA_RHOPB	Q21BY5	Rhodopseudomonas palustris (strain BisB18)	1.0538	0.824564	12412.9	13117.3	1.05675	0.430615
Phosphomethylpyrimidine synthase (EC 4.1.99.17) (Hydroxymethylpyrimidine phosphate synthase) (HMP-P synthase) (HMP-phosphate synthase) (HMPP synthase) (Thiamine biosynthesis protein ThiC)	sp|Q133T3|THIC_RHOPS	Q133T3	Rhodopseudomonas palustris (strain BisB5)	0.3074	0.0131435	6721.04	3033.26	0.451308	0.00298482
Tryptophan synthase beta chain (EC 4.2.1.20)	sp|Q07UH1|TRPB_RHOP5	Q07UH1	Rhodopseudomonas palustris (strain BisA53)	0.8588	0.501552	14059.5	11720.8	0.833653	0.305296
Alanine--tRNA ligase (EC 6.1.1.7) (Alanyl-tRNA synthetase) (AlaRS)	sp|Q2ITM9|SYA_RHOP2	Q2ITM9	Rhodopseudomonas palustris (strain HaA2)	0.9098	0.690984	14600.7	13874	0.950228	0.644436
Tol-Pal system protein TolB	sp|Q20X63|TOLB_RHOPB	Q20X63	Rhodopseudomonas palustris (strain BisB18)	1.0665	0.772873	9538.89	10113.2	1.0602	0.420045
ATP synthase gamma chain (ATP synthase F1 sector gamma subunit) (F-ATPase gamma subunit)	sp|Q07UZ4|ATPG_RHOP5	Q07UZ4	Rhodopseudomonas palustris (strain BisA53)	1.0842	0.696511	54409.7	58377.2	1.07292	0.567259
1-deoxy-D-xylulose-5-phosphate synthase (EC 2.2.1.7) (1-deoxyxylulose-5-phosphate synthase) (DXP synthase) (DXPS)	sp|Q21A74|DXS_RHOPB	Q21A74	Rhodopseudomonas palustris (strain BisB18)	0.8903	0.578341	24169.7	22617.4	0.935777	0.449112
Elongation factor G (EF-G)	sp|Q2IXR3|EFG_RHOP2	Q2IXR3	Rhodopseudomonas palustris (strain HaA2)	0.8772	0.603141	65001.8	56263.6	0.865569	0.179563
Elongation factor P (EF-P)	sp|Q07MG7|EFP_RHOP5	Q07MG7	Rhodopseudomonas palustris (strain BisA53)	0.6259	0.175633	28343.8	17166	0.605635	0.0217252
Chaperonin GroEL 2 (EC 5.6.1.7) (60 kDa chaperonin 2) (Chaperonin-60 2) (Cpn60 2)	sp|Q20X88|CH602_RHOPB	Q20X88	Rhodopseudomonas palustris (strain BisB18)	0.9166	0.698238	337209	309195	0.916923	0.542104
Histidine--tRNA ligase (EC 6.1.1.21) (Histidyl-tRNA synthetase) (HisRS)	sp|Q21AX3|SYH_RHOPB	Q21AX3	Rhodopseudomonas palustris (strain BisB18)	1.0764	0.713	11233.4	14927.7	1.32886	0.566274
						14738	14738	1	1
						1	1	1	#DIV/0!
			5	2	0.4
[truncated: 5,000 more columns]

## Sheet: faecalis
						Species/group adjusted
Protein Description	Protein Name	Protein Accession	Protein Species	Fold Change	P-Value	mean Car2	mean car3	Car3/Car2	p value	Columna1	Columna3	Columna4	Columna5	Columna6	Columna7	Columna8	Columna9	Columna10	Columna11	Columna12	Columna13	Columna14	Columna15	Columna16	Columna17	Columna18	Columna19	Columna20	Columna21	Columna22	Columna23	Columna24	Columna25	Columna26	Columna27	Columna28	Columna29	Columna30	Columna31	Columna32	Columna33	Columna34	Columna35	Columna36	Columna37	Columna38	Columna39	Columna40	Columna41
50S ribosomal protein L29	tr|A0A318TCT5|A0A318TCT5_9BRAD	A0A318TCT5	Rhodopseudomonas faecalis	0.8271	0.54448	56220.5	41340	0.73532	0.129475
3-isopropylmalate dehydrogenase (EC 1.1.1.85) (3-IPM-DH) (Beta-IPM dehydrogenase) (IMDH)	tr|A0A318TBA6|A0A318TBA6_9BRAD	A0A318TBA6	Rhodopseudomonas faecalis	0.9455	0.803787	33188.6	27782.4	0.837107	0.0101492
Ribulose bisphosphate carboxylase large chain (RuBisCO large subunit) (EC 4.1.1.39)	tr|A0A318T8B3|A0A318T8B3_9BRAD	A0A318T8B3	Rhodopseudomonas faecalis	1.5289	0.279574	1.2486e+06	1.56801e+06	1.25581	0.280069
Dihydroorotate dehydrogenase (quinone) (EC 1.3.5.2) (DHOdehase) (DHOD) (DHODase) (Dihydroorotate oxidase)	tr|A0A318TJE9|A0A318TJE9_9BRAD	A0A318TJE9	Rhodopseudomonas faecalis	1.1145	0.554222	5965.15	7218.77	1.21016	0.307238
Cytochrome c553	tr|A0A318TQI5|A0A318TQI5_9BRAD	A0A318TQI5	Rhodopseudomonas faecalis	0.6339	0.40263	6301.03	5448.27	0.864663	0.150528
Lactoylglutathione lyase	tr|A0A318TEX1|A0A318TEX1_9BRAD	A0A318TEX1	Rhodopseudomonas faecalis	1.3756	0.163455	9091.99	10657	1.17214	0.0848198
Putative PIG3 family NAD(P)H quinone oxidoreductase	tr|A0A318TIC4|A0A318TIC4_9BRAD	A0A318TIC4	Rhodopseudomonas faecalis	0.9924	0.971542	12632.1	11073.7	0.876629	0.117679
Ribosomal RNA small subunit methyltransferase G (EC 2.1.1.170) (16S rRNA 7-methylguanosine methyltransferase) (16S rRNA m7G methyltransferase)	tr|A0A318TCI8|A0A318TCI8_9BRAD	A0A318TCI8	Rhodopseudomonas faecalis	0.8195	0.356222	1696.75	1234.55	0.727597	0.00176638
Metallo-beta-lactamase family protein	tr|A0A318TBF4|A0A318TBF4_9BRAD	A0A318TBF4	Rhodopseudomonas faecalis	1.4862	0.141655	7725.27	8972.59	1.16146	0.258519
Protein-disulfide isomerase	tr|A0A318TI39|A0A318TI39_9BRAD	A0A318TI39	Rhodopseudomonas faecalis	0.2062	0.018944	17469.2	5306.84	0.303782	0.000253866
Co-chaperonin GroES (10 kDa chaperonin) (Chaperonin-10) (Cpn10)	tr|A0A318U076|A0A318U076_9BRAD	A0A318U076	Rhodopseudomonas faecalis	0.902	0.716394	512714	420192	0.819544	0.359823
Hydrogenobyrinate a,c-diamide synthase (EC 6.3.5.9) (Hydrogenobyrinic acid a,c-diamide synthase)	tr|A0A318TMQ0|A0A318TMQ0_9BRAD	A0A318TMQ0	Rhodopseudomonas faecalis	0.8509	0.567748	4804.92	3879.83	0.80747	0.373242
IclR family transcriptional regulator	tr|A0A318TL71|A0A318TL71_9BRAD	A0A318TL71	Rhodopseudomonas faecalis	0.9025	0.688027	13821.8	11313.9	0.818554	0.0424904
NAD(P)-dependent dehydrogenase (Short-subunit alcohol dehydrogenase family)	tr|A0A318TIZ5|A0A318TIZ5_9BRAD	A0A318TIZ5	Rhodopseudomonas faecalis	2.3948	0.00201913	7864.95	16778.2	2.13328	2.39484e-05
AsnC family transcriptional regulator	tr|A0A318T8P6|A0A318T8P6_9BRAD	A0A318T8P6	Rhodopseudomonas faecalis	1.1987	0.746054	27079.1	26823.8	0.990574	0.980096
DUF4864 domain-containing protein	tr|A0A318TBK0|A0A318TBK0_9BRAD	A0A318TBK0	Rhodopseudomonas faecalis	1.4088	0.202015	17217	21385.9	1.24214	0.0484068
Probable transcriptional regulatory protein BJ122_10998	tr|A0A318TGI7|A0A318TGI7_9BRAD	A0A318TGI7	Rhodopseudomonas faecalis	0.7529	0.0765221	11966.8	7618.05	0.636601	0.00180074
Parvulin-like PPIase (Peptidyl-prolyl cis-trans isomerase plp) (Rotamase plp)	tr|A0A318TUF3|A0A318TUF3_9BRAD	A0A318TUF3	Rhodopseudomonas faecalis	1.1288	0.508141	3457.22	3617.72	1.04642	0.593326
NAD(P)-dependent dehydrogenase (Short-subunit alcohol dehydrogenase family)	tr|A0A318TMM1|A0A318TMM1_9BRAD	A0A318TMM1	Rhodopseudomonas faecalis	1.1524	0.392758	6451.31	6104.71	0.946274	0.382624
DNA topoisomerase 1 (EC 5.6.2.1) (DNA topoisomerase I)	tr|A0A318THG6|A0A318THG6_9BRAD	A0A318THG6	Rhodopseudomonas faecalis	0.7924	0.217209	5441.93	3912.16	0.718892	4.7736e-05
Multidrug efflux system membrane fusion protein	tr|A0A318TYV9|A0A318TYV9_9BRAD	A0A318TYV9	Rhodopseudomonas faecalis	1.1911	0.504354	12008.6	12579	1.0475	0.613318
Protein-glutamate methylesterase/protein-glutamine glutaminase (EC 3.1.1.61) (EC 3.5.1.44)	tr|A0A318T7X2|A0A318T7X2_9BRAD	A0A318T7X2	Rhodopseudomonas faecalis	0.6257	0.0852401	9946.41	5741.31	0.577225	3.03602e-05
AsnC family transcriptional regulator	tr|A0A318T8U1|A0A318T8U1_9BRAD	A0A318T8U1	Rhodopseudomonas faecalis	1.3071	0.373429	19785.1	22395.8	1.13195	0.50247
3'(2'),5'-bisphosphate nucleotidase CysQ (EC 3.1.3.7) (3'(2'),5-bisphosphonucleoside 3'(2')-phosphohydrolase) (3'-phosphoadenosine 5'-phosphate phosphatase) (PAP phosphatase)	tr|A0A318TCD8|A0A318TCD8_9BRAD	A0A318TCD8	Rhodopseudomonas faecalis	1.3516	0.0796717	3032.15	3584.56	1.18218	0.184231
DUF1244 domain-containing protein	tr|A0A318TFH7|A0A318TFH7_9BRAD	A0A318TFH7	Rhodopseudomonas faecalis	2.1166	0.0158235	4449.66	8042.77	1.8075	0.0117169
3-oxoacyl-[acyl-carrier-protein] reductase /acetoacetyl-CoA reductase	tr|A0A318TA66|A0A318TA66_9BRAD	A0A318TA66	Rhodopseudomonas faecalis	1.6861	0.0286881	12048.8	18234.5	1.51338	5.2518e-05
Chaperone protein DnaK (HSP70) (Heat shock 70 kDa protein) (Heat shock protein 70)	tr|A0A318TB09|A0A318TB09_9BRAD	A0A318TB09	Rhodopseudomonas faecalis	1.4142	0.137025	67069.6	85215.8	1.27056	0.0492629
Putative RNA-binding protein with PUA-like domain	tr|A0A318TBD3|A0A318TBD3_9BRAD	A0A318TBD3	Rhodopseudomonas faecalis	1.1284	0.581728	6796.21	14842.2	2.18389	0.255453
Sugar transport protein	tr|A0A318TTL1|A0A318TTL1_9BRAD	A0A318TTL1	Rhodopseudomonas faecalis	0.8529	0.613449	3001.72	2416.64	0.805084	0.197282
Signal peptide protein	tr|A0A318TGK2|A0A318TGK2_9BRAD	A0A318TGK2	Rhodopseudomonas faecalis	2.2927	0.0127842	4799.77	10167.2	2.11828	0.00690509
Uncharacterized protein DUF3222	tr|A0A318TG07|A0A318TG07_9BRAD	A0A318TG07	Rhodopseudomonas faecalis	1.115	0.817853	19764.7	21580.7	1.09188	0.804573
Amidophosphoribosyltransferase (ATase) (EC 2.4.2.14) (Glutamine phosphoribosylpyrophosphate amidotransferase) (GPATase)	tr|A0A318TNC2|A0A318TNC2_9BRAD	A0A318TNC2	Rhodopseudomonas faecalis	0.5862	0.0109194	17224.8	9837.47	0.571123	5.41204e-05
Methyltransferase family protein	tr|A0A318TFU5|A0A318TFU5_9BRAD	A0A318TFU5	Rhodopseudomonas faecalis	1.0233	0.938906	2338.43	2090.4	0.893934	0.421072
Secondary thiamine-phosphate synthase enzyme	tr|A0A318TIQ7|A0A318TIQ7_9BRAD	A0A318TIQ7	Rhodopseudomonas faecalis	1.8032	0.152426	3062.05	1692.73	0.55281	0.481652
3-hydroxyacyl-[acyl-carrier-protein] dehydratase FabZ (EC 4.2.1.59) ((3R)-hydroxymyristoyl-[acyl-carrier-protein] dehydratase) ((3R)-hydroxymyristoyl-ACP dehydrase) (Beta-hydroxyacyl-ACP dehydratase)	tr|A0A318U0N5|A0A318U0N5_9BRAD	A0A318U0N5	Rhodopseudomonas faecalis	0.7354	0.282719	9665.14	6960.49	0.720164	0.0903523
Pyridoxine/pyridoxamine 5'-phosphate oxidase (EC 1.4.3.5) (PNP/PMP oxidase) (PNPOx) (Pyridoxal 5'-phosphate synthase)	tr|A0A318TDN2|A0A318TDN2_9BRAD	A0A318TDN2	Rhodopseudomonas faecalis	1.0268	0.881617	10438.7	9515.12	0.911524	0.310283
Uncharacterized protein DUF4164	tr|A0A318TTG2|A0A318TTG2_9BRAD	A0A318TTG2	Rhodopseudomonas faecalis	0.9311	0.797593	6044.79	5611.8	0.928369	0.584395
3-oxoacyl-[acyl-carrier-protein] synthase I	tr|A0A318T9K1|A0A318T9K1_9BRAD	A0A318T9K1	Rhodopseudomonas faecalis	1.182	0.472008	23924.1	25429.1	1.06291	0.482526
Amino acid/amide ABC transporter ATP-binding protein 1 (HAAT family)	tr|A0A318T962|A0A318T962_9BRAD	A0A318T962	Rhodopseudomonas faecalis	1.7464	0.383979	3038.97	3796.24	1.24918	0.122868
Uroporphyrinogen decarboxylase (UPD) (URO-D) (EC 4.1.1.37)	tr|A0A318TDD9|A0A318TDD9_9BRAD	A0A318TDD9	Rhodopseudomonas faecalis	1.0704	0.742934	106860	102051	0.955001	0.269247
ADP-L-glycero-D-manno-heptose-6-epimerase (EC 5.1.3.20) (ADP-L-glycero-beta-D-manno-heptose-6-epimerase) (ADP-glyceromanno-heptose 6-epimerase) (ADP-hep 6-epimerase) (AGME)	tr|A0A318TA28|A0A318TA28_9BRAD	A0A318TA28	Rhodopseudomonas faecalis	0.9904	0.986361	1725.38	1422.33	0.824357	0.395728
Protein adenylyltransferase SelO (EC 2.7.7.n1)	tr|A0A318TEU7|A0A318TEU7_9BRAD	A0A318TEU7	Rhodopseudomonas faecalis	2.0741	0.0219406	2274.38	4171.63	1.83418	0.00450765
Citrate lyase subunit beta/citryl-CoA lyase	tr|A0A318TAK8|A0A318TAK8_9BRAD	A0A318TAK8	Rhodopseudomonas faecalis	1.1417	0.394488	14373.9	16078.8	1.11861	0.192912
Phosphoribosylaminoimidazole-succinocarboxamide synthase (EC 6.3.2.6) (SAICAR synthetase)	tr|A0A318T839|A0A318T839_9BRAD	A0A318T839	Rhodopseudomonas faecalis	0.927	0.739967	10889.1	10714	0.983921	0.88048
Sulfide dehydrogenase (Flavocytochrome c) flavoprotein subunit	tr|A0A318TG20|A0A318TG20_9BRAD	A0A318TG20	Rhodopseudomonas faecalis	0.9147	0.856392	62391.6	52610	0.843222	0.60189
Spermidine/putrescine import ATP-binding protein PotA (EC 7.6.2.11)	tr|A0A318TFL1|A0A318TFL1_9BRAD	A0A318TFL1	Rhodopseudomonas faecalis	1.2568	0.316431	9503.5	10217.6	1.07514	0.377942
DNA repair protein RecN (Recombination protein N)	tr|A0A318TC02|A0A318TC02_9BRAD	A0A318TC02	Rhodopseudomonas faecalis	0.8706	0.410214	2146.59	1649.15	0.768266	0.0584994
DNA-directed RNA polymerase subunit omega (RNAP omega subunit) (EC 2.7.7.6) (RNA polymerase omega subunit) (Transcriptase subunit omega)	tr|A0A318TIX4|A0A318TIX4_9BRAD	A0A318TIX4	Rhodopseudomonas faecalis	1.0817	0.744293	35589.8	33778.5	0.949107	0.657026
Short chain enoyl-CoA hydratase	tr|A0A318TJT0|A0A318TJT0_9BRAD	A0A318TJT0	Rhodopseudomonas faecalis	1.4502	0.12253	47194.8	60711.9	1.28641	0.0649861
Thiamine-phosphate pyrophosphorylase	tr|A0A318TDU4|A0A318TDU4_9BRAD	A0A318TDU4	Rhodopseudomonas faecalis	0.9011	0.275385	7455.63	6103.29	0.818615	0.116641
Histidine phosphotransferase ChpT	tr|A0A318TMY4|A0A318TMY4_9BRAD	A0A318TMY4	Rhodopseudomonas faecalis	1.2589	0.361616	19319.4	21488	1.11225	0.165431
Lipoprotein	tr|A0A318TI55|A0A318TI55_9BRAD	A0A318TI55	Rhodopseudomonas faecalis	0.9052	0.763945	1696.69	1309.08	0.771549	0.159596
Ketol-acid reductoisomerase (NADP(+)) (KARI) (EC 1.1.1.86) (Acetohydroxy-acid isomeroreductase) (AHIR) (Alpha-keto-beta-hydroxylacyl reductoisomerase)	tr|A0A318THL9|A0A318THL9_9BRAD	A0A318THL9	Rhodopseudomonas faecalis	1.189	0.557161	106223	113128	1.065	0.640188
Uncharacterized protein GlcG (DUF336 family)	tr|A0A318TDP2|A0A318TDP2_9BRAD	A0A318TDP2	Rhodopseudomonas faecalis	0.7296	0.330632	1693.19	1122.21	0.662776	0.00305409
Aspartyl-tRNA(Asn)/glutamyl-tRNA(Gln) amidotransferase subunit A	tr|A0A318TJ07|A0A318TJ07_9BRAD	A0A318TJ07	Rhodopseudomonas faecalis	1.0753	0.797767	13893.5	14776.5	1.06356	0.686447
Pyruvate dehydrogenase E1 component subunit beta (EC 1.2.4.1)	tr|A0A318TNP4|A0A318TNP4_9BRAD	A0A318TNP4	Rhodopseudomonas faecalis	1.2051	0.422517	5963.62	6507.91	1.09127	0.371563
Methyl-accepting chemotaxis protein	tr|A0A318T889|A0A318T889_9BRAD	A0A318T889	Rhodopseudomonas faecalis	0.7231	0.606409	3509.15	2257.49	0.643314	0.256308
Superfamily II DNA/RNA helicase	tr|A0A318TFW3|A0A318TFW3_9BRAD	A0A318TFW3	Rhodopseudomonas faecalis	0.7498	0.222844	8722.03	5825.82	0.667943	0.0106101
VWA domain-containing protein	tr|A0A318TEC5|A0A318TEC5_9BRAD	A0A318TEC5	Rhodopseudomonas faecalis	2.5798	0.000702167	1919.39	3271.62	1.70451	0.00212166
C4-dicarboxylate ABC transporter	tr|A0A318TGX7|A0A318TGX7_9BRAD	A0A318TGX7	Rhodopseudomonas faecalis	0.7931	0.582991	3710.61	3224.54	0.869005	0.146064
RNA pyrophosphohydrolase (EC 3.6.1.-) ((Di)nucleoside polyphosphate hydrolase)	tr|A0A318TBT6|A0A318TBT6_9BRAD	A0A318TBT6	Rhodopseudomonas faecalis	0.9175	0.635719	13015.9	10685.8	0.820981	0.22549
Aryl-alcohol dehydrogenase-like predicted oxidoreductase	tr|A0A318T8J9|A0A318T8J9_9BRAD	A0A318T8J9	Rhodopseudomonas faecalis	2.2794	0.00433236	16002.9	31648.1	1.97765	0.000584978
50S ribosomal protein L27	tr|A0A318THV9|A0A318THV9_9BRAD	A0A318THV9	Rhodopseudomonas faecalis	0.8583	0.502043	397437	303628	0.763966	0.0262763
Collagen-like protein	tr|A0A318T8W4|A0A318T8W4_9BRAD	A0A318T8W4	Rhodopseudomonas faecalis	0.9686	0.862838	3895.83	3307.04	0.848865	0.119922
Cupin_2 domain-containing protein	tr|A0A318TYS3|A0A318TYS3_9BRAD	A0A318TYS3	Rhodopseudomonas faecalis	1.2981	0.439717	3823.68	4633.95	1.21191	0.376226
Uncharacterized protein DUF3108	tr|A0A318T9G0|A0A318T9G0_9BRAD	A0A318T9G0	Rhodopseudomonas faecalis	1.5172	0.250962	2083.64	2024.26	0.971502	0.753497
Transcriptional regulator	tr|A0A318T990|A0A318T990_9BRAD	A0A318T990	Rhodopseudomonas faecalis	1.3468	0.21884	5624.39	6863.23	1.22026	0.259242
Tryptophan synthase beta chain (EC 4.2.1.20)	tr|A0A318TNC7|A0A318TNC7_9BRAD	A0A318TNC7	Rhodopseudomonas faecalis	0.9403	0.782047	17485.7	16444.9	0.940474	0.60103
DUF2497 domain-containing protein	tr|A0A318TF91|A0A318TF91_9BRAD	A0A318TF91	Rhodopseudomonas faecalis	1.0815	0.690061	8260.2	7990.43	0.967341	0.703691
Glycerol kinase (EC 2.7.1.30) (ATP:glycerol 3-phosphotransferase) (Glycerokinase) (GK)	tr|A0A318TEN0|A0A318TEN0_9BRAD	A0A318TEN0	Rhodopseudomonas faecalis	0.9697	0.934639	3649.86	3374.52	0.924562	0.666898
3-oxoacyl-[acyl-carrier-protein] synthase II	tr|A0A318TML2|A0A318TML2_9BRAD	A0A318TML2	Rhodopseudomonas faecalis	1.0155	0.936359	7948.95	7130.03	0.896977	0.0690757
Glycine dehydrogenase (decarboxylating) (EC 1.4.4.2) (Glycine cleavage system P-protein) (Glycine decarboxylase) (Glycine dehydrogenase (aminomethyl-transferring))	tr|A0A318T803|A0A318T803_9BRAD	A0A318T803	Rhodopseudomonas faecalis	1.7462	0.0281703	2925.99	2936.73	1.00367	0.959635
Agarase	tr|A0A318TE10|A0A318TE10_9BRAD	A0A318TE10	Rhodopseudomonas faecalis	1.346	0.268558	6879.78	3696.89	0.537357	0.389011
Leucyl aminopeptidase	tr|A0A318TIT0|A0A318TIT0_9BRAD	A0A318TIT0	Rhodopseudomonas faecalis	1.5501	0.187695	9655.96	10445.6	1.08178	0.475962
Ribose-phosphate pyrophosphokinase (RPPK) (EC 2.7.6.1) (5-phospho-D-ribosyl alpha-1-diphosphate) (Phosphoribosyl diphosphate synthase) (Phosphoribosyl pyrophosphate synthase) (P-Rib-PP synthase) (PRPP synthase) (PRPPase)	tr|A0A318TAF7|A0A318TAF7_9BRAD	A0A318TAF7	Rhodopseudomonas faecalis	0.7071	0.142928	28564.1	17944.5	0.62822	0.00361598
Porphobilinogen deaminase (EC 2.5.1.61) (Hydroxymethylbilane synthase) (Pre-uroporphyrinogen synthase)	tr|A0A318TFY1|A0A318TFY1_9BRAD	A0A318TFY1	Rhodopseudomonas faecalis	0.9933	0.977051	56621.4	49976	0.882633	0.0934256
Enoyl-CoA hydratase	tr|A0A318U0E2|A0A318U0E2_9BRAD	A0A318U0E2	Rhodopseudomonas faecalis	1.124	0.514755	8832.55	8927.11	1.01071	0.884043
3-deoxy-D-manno-octulosonic acid transferase (Kdo transferase) (EC 2.4.99.12) (Lipid IV(A) 3-deoxy-D-manno-octulosonic acid transferase)	tr|A0A318TXR9|A0A318TXR9_9BRAD	A0A318TXR9	Rhodopseudomonas faecalis	0.816	0.395571	3874.14	3944.01	1.01803	0.696576
Dihydrolipoyllysine-residue succinyltransferase component of 2-oxoglutarate dehydrogenase complex (EC 2.3.1.61) (2-oxoglutarate dehydrogenase complex component E2)	tr|A0A318TE82|A0A318TE82_9BRAD	A0A318TE82	Rhodopseudomonas faecalis	1.175	0.473933	17146	18015.7	1.05072	0.519235
Phosphoglycolate phosphatase (PGP) (PGPase) (EC 3.1.3.18)	tr|A0A318TJN0|A0A318TJN0_9BRAD	A0A318TJN0	Rhodopseudomonas faecalis	1.7116	0.02733	8669.72	12959.4	1.49479	0.000912817
Acetyl-CoA acetyltransferase	tr|A0A318T8N2|A0A318T8N2_9BRAD	A0A318T8N2	Rhodopseudomonas faecalis	2.2539	0.00887381	24859.5	49568.2	1.99393	0.000160902
Adenylosuccinate lyase (ASL) (EC 4.3.2.2) (Adenylosuccinase)	tr|A0A318TJH8|A0A318TJH8_9BRAD	A0A318TJH8	Rhodopseudomonas faecalis	0.9171	0.660791	18797.1	15240	0.810761	0.00213727
Outer membrane immunogenic protein	tr|A0A318T7S1|A0A318T7S1_9BRAD	A0A318T7S1	Rhodopseudomonas faecalis	0.5473	0.144213	8387.26	3868.23	0.461203	0.0495578
Invasion protein IalB	tr|A0A318TMG1|A0A318TMG1_9BRAD	A0A318TMG1	Rhodopseudomonas faecalis	1.0053	0.982128	6707.64	6115.27	0.911688	0.35792
Arginine--tRNA ligase (EC 6.1.1.19) (Arginyl-tRNA synthetase) (ArgRS)	tr|A0A318TNQ5|A0A318TNQ5_9BRAD	A0A318TNQ5	Rhodopseudomonas faecalis	1.0122	0.95062	6665.42	6133.43	0.920187	0.342084
Putative surface protein with fasciclin (FAS1) repeats	tr|A0A318TEU6|A0A318TEU6_9BRAD	A0A318TEU6	Rhodopseudomonas faecalis	15.0154	0.000146104	83056.7	846788	10.1953	0.000193658
Aspartate/methionine/tyrosine aminotransferase	tr|A0A318TK51|A0A318TK51_9BRAD	A0A318TK51	Rhodopseudomonas faecalis	0.6735	0.140537	10782.8	8161.36	0.75689	0.0600737
Peptidyl-dipeptidase Dcp	tr|A0A318TTN4|A0A318TTN4_9BRAD	A0A318TTN4	Rhodopseudomonas faecalis	1.2013	0.26109	6489.75	6668.29	1.02751	0.771282
RNA polymerase sigma factor RpoD (Sigma-70)	tr|A0A318TIW2|A0A318TIW2_9BRAD	A0A318TIW2	Rhodopseudomonas faecalis	1.0093	0.970593	11039.5	10010.4	0.906788	0.305154
Inner membrane protein	tr|A0A318TQG9|A0A318TQG9_9BRAD	A0A318TQG9	Rhodopseudomonas faecalis	1.1223	0.624738	9319.16	9162.27	0.983165	0.85837
Helix-hairpin-helix protein	tr|A0A318TAY0|A0A318TAY0_9BRAD	A0A318TAY0	Rhodopseudomonas faecalis	0.6236	0.356853	63671.8	40469	0.635588	0.244121
HerA_C domain-containing protein	tr|A0A318TJU4|A0A318TJU4_9BRAD	A0A318TJU4	Rhodopseudomonas faecalis	2.3474	0.00344959	7686.65	15455.7	2.01072	2.17792e-05
Ribulose bisphosphate carboxylase (RuBisCO) (EC 4.1.1.39)	tr|A0A318TVC6|A0A318TVC6_9BRAD	A0A318TVC6	Rhodopseudomonas faecalis	0.7963	0.503358	71133.6	49761.9	0.699555	0.119109
Acetyltransferase (GNAT) family protein	tr|A0A318TTX1|A0A318TTX1_9BRAD	A0A318TTX1	Rhodopseudomonas faecalis	2.3172	0.0364831	14368.4	27103.6	1.88633	0.00811501
Putative heparinase superfamily protein	tr|A0A318TGW9|A0A318TGW9_9BRAD	A0A318TGW9	Rhodopseudomonas faecalis	1.105	0.655727	2914.18	2874.8	0.986485	0.825037
2-oxoglutarate ferredoxin oxidoreductase alpha subunit	tr|A0A318TI19|A0A318TI19_9BRAD	A0A318TI19	Rhodopseudomonas faecalis	0.6805	0.12697	13422.3	10489.8	0.781519	0.00414331
Amino acid/amide ABC transporter ATP-binding protein 1 (HAAT family)	tr|A0A318TIU3|A0A318TIU3_9BRAD	A0A318TIU3	Rhodopseudomonas faecalis	1.9592	0.149934	1222.13	1509.85	1.23543	0.067728
SPFH domain-containing protein	tr|A0A318TEM1|A0A318TEM1_9BRAD	A0A318TEM1	Rhodopseudomonas faecalis	1.3376	0.286305	3293.43	3466.37	1.05251	0.795968
Methylmalonyl-CoA mutase metallochaperone MeaB	tr|A0A318TJ46|A0A318TJ46_9BRAD	A0A318TJ46	Rhodopseudomonas faecalis	0.996	0.981525	8478.75	7508.36	0.88555	0.398775
UvrABC system protein B (Protein UvrB) (Excinuclease ABC subunit B)	tr|A0A318TCE5|A0A318TCE5_9BRAD	A0A318TCE5	Rhodopseudomonas faecalis	0.8229	0.842614	2660.89	3319.07	1.24736	0.350404
Branched-chain-amino-acid aminotransferase (EC 2.6.1.42)	tr|A0A318TCP3|A0A318TCP3_9BRAD	A0A318TCP3	Rhodopseudomonas faecalis	0.8901	0.647414	24077.6	19677.1	0.817236	0.0377465
Uncharacterized protein DUF1236	tr|A0A318TBV7|A0A318TBV7_9BRAD	A0A318TBV7	Rhodopseudomonas faecalis	2.0373	0.366711	7629.82	10674.9	1.3991	0.452993
DNA-binding transcriptional MerR regulator	tr|A0A318TVW1|A0A318TVW1_9BRAD	A0A318TVW1	Rhodopseudomonas faecalis	1.2579	0.24143	4026.07	4473.41	1.11111	0.105507
Putative lipid-binding transport protein (Tim44 family)	tr|A0A318T7Y3|A0A318T7Y3_9BRAD	A0A318T7Y3	Rhodopseudomonas faecalis	1.9074	0.00330656	8772.79	14851.2	1.69287	0.000675676
Heptosyltransferase-2	tr|A0A318TIC6|A0A318TIC6_9BRAD	A0A318TIC6	Rhodopseudomonas faecalis	0.9376	0.794492	4215	3708.02	0.87972	0.240218
GTP cyclohydrolase 1 (EC 3.5.4.16) (GTP cyclohydrolase I) (GTP-CH-I)	tr|A0A318TKZ4|A0A318TKZ4_9BRAD	A0A318TKZ4	Rhodopseudomonas faecalis	0.9539	0.832109	7701.5	6500.62	0.844072	0.0153608
Beta sliding clamp	tr|A0A318T7H8|A0A318T7H8_9BRAD	A0A318T7H8	Rhodopseudomonas faecalis	1.1349	0.546855	18358.6	18313.4	0.997538	0.937608
Crp/Fnr family transcriptional regulator	tr|A0A318TGP4|A0A318TGP4_9BRAD	A0A318TGP4	Rhodopseudomonas faecalis	1.4661	0.144509	7663.35	9402.48	1.22694	0.377097
Phasin	tr|A0A318TFD2|A0A318TFD2_9BRAD	A0A318TFD2	Rhodopseudomonas faecalis	1.5319	0.086254	12489.8	15186.8	1.21594	0.195411
Starvation-inducible DNA-binding protein	tr|A0A318TKY8|A0A318TKY8_9BRAD	A0A318TKY8	Rhodopseudomonas faecalis	1.4518	0.203881	80325.9	104043	1.29526	0.122323
DUF1491 family protein	tr|A0A318TKG5|A0A318TKG5_9BRAD	A0A318TKG5	Rhodopseudomonas faecalis	1.0165	0.936487	2450.53	2202.31	0.898708	0.197128
Short-chain dehydrogenase	tr|A0A318TTS6|A0A318TTS6_9BRAD	A0A318TTS6	Rhodopseudomonas faecalis	2.1542	0.00654337	1640.72	3175.46	1.93541	0.0198526
Aspartate/methionine/tyrosine aminotransferase	tr|A0A318TNV9|A0A318TNV9_9BRAD	A0A318TNV9	Rhodopseudomonas faecalis	0.8972	0.622307	4959.09	3939.25	0.794349	0.00774504
NADH dehydrogenase subunit F	tr|A0A318TBV1|A0A318TBV1_9BRAD	A0A318TBV1	Rhodopseudomonas faecalis	1.2964	0.175259	4059.04	4639.79	1.14308	0.106511
5-methyltetrahydropteroyltriglutamate--homocysteine methyltransferase (EC 2.1.1.14) (Cobalamin-independent methionine synthase) (Methionine synthase, vitamin-B12 independent isozyme)	tr|A0A318TU72|A0A318TU72_9BRAD	A0A318TU72	Rhodopseudomonas faecalis	1.664	0.0636969	12897.7	18993.3	1.47261	0.0363164
Acyl-CoA thioesterase FadM	tr|A0A318TGH0|A0A318TGH0_9BRAD	A0A318TGH0	Rhodopseudomonas faecalis	0.8498	0.452533	6300.42	4695.73	0.745304	0.0496246
Periplasmic serine endoprotease DegP-like (EC 3.4.21.107)	tr|A0A318T8E4|A0A318T8E4_9BRAD	A0A318T8E4	Rhodopseudomonas faecalis	1.1123	0.656985	13190.1	13142.1	0.996368	0.969022
Gamma-glutamylcyclotransferase (GGCT)/AIG2-like uncharacterized protein YtfP	tr|A0A318THM8|A0A318THM8_9BRAD	A0A318THM8	Rhodopseudomonas faecalis	2.0537	0.0289456	4780.11	8597.58	1.79861	0.0327097
Nitrogen regulatory protein P-II	tr|A0A318TF09|A0A318TF09_9BRAD	A0A318TF09	Rhodopseudomonas faecalis	1.707	0.136497	35518.2	37475.6	1.05511	0.727662
Succinyl-diaminopimelate desuccinylase (SDAP desuccinylase) (EC 3.5.1.18) (N-succinyl-LL-2,6-diaminoheptanedioate amidohydrolase)	tr|A0A318TGJ2|A0A318TGJ2_9BRAD	A0A318TGJ2	Rhodopseudomonas faecalis	1.1462	0.534185	3580.42	3661.89	1.02275	0.74815
Protein tyrosine/serine phosphatase	tr|A0A318TKQ3|A0A318TKQ3_9BRAD	A0A318TKQ3	Rhodopseudomonas faecalis	2.0894	0.000722138	5230.29	9101.61	1.74017	0.0184906
Pyrroline-5-carboxylate reductase (P5C reductase) (P5CR) (EC 1.5.1.2) (PCA reductase)	tr|A0A318TAA9|A0A318TAA9_9BRAD	A0A318TAA9	Rhodopseudomonas faecalis	0.998	0.993673	9922.32	8559.7	0.862672	0.160002
Protein-export protein SecB	tr|A0A318TCZ7|A0A318TCZ7_9BRAD	A0A318TCZ7	Rhodopseudomonas faecalis	0.9723	0.906896	107759	93250.2	0.865356	0.210682
[LSU ribosomal protein L3P]-glutamine N5-methyltransferase	tr|A0A318TIC1|A0A318TIC1_9BRAD	A0A318TIC1	Rhodopseudomonas faecalis	1.1641	0.632421	2503.56	2852.89	1.13954	0.501104
Aldehyde dehydrogenase (NAD+)	tr|A0A318TK87|A0A318TK87_9BRAD	A0A318TK87	Rhodopseudomonas faecalis	1.4285	0.126787	19831.1	25267.6	1.27414	0.0179721
50S ribosomal protein L6	tr|A0A318TCR3|A0A318TCR3_9BRAD	A0A318TCR3	Rhodopseudomonas faecalis	0.766	0.352375	135218	89789.5	0.664033	0.0280239
Cobaltochelatase CobT subunit	tr|A0A318TBS7|A0A318TBS7_9BRAD	A0A318TBS7	Rhodopseudomonas faecalis	1.5823	0.0298857	7438.05	10400.1	1.39823	0.0145933
Methionine synthase (EC 2.1.1.13) (5-methyltetrahydrofolate--homocysteine methyltransferase)	tr|A0A318TD61|A0A318TD61_9BRAD	A0A318TD61	Rhodopseudomonas faecalis	0.5182	0.00555107	7977.93	4488.32	0.562592	4.65979e-05
UDP-glucose 4-epimerase (EC 5.1.3.2)	tr|A0A318TM80|A0A318TM80_9BRAD	A0A318TM80	Rhodopseudomonas faecalis	1.1399	0.618653	1800.39	1783.18	0.99044	0.942775
Polyribonucleotide nucleotidyltransferase (EC 2.7.7.8) (Polynucleotide phosphorylase) (PNPase)	tr|A0A318TE72|A0A318TE72_9BRAD	A0A318TE72	Rhodopseudomonas faecalis	1.0854	0.748856	41917.6	40668.6	0.970204	0.812461
Protein HflK	tr|A0A318T9C4|A0A318T9C4_9BRAD	A0A318T9C4	Rhodopseudomonas faecalis	2.0442	0.024683	20478.9	35529.1	1.73491	0.00183678
Indole-3-glycerol phosphate synthase (IGPS) (EC 4.1.1.48)	tr|A0A318TLZ9|A0A318TLZ9_9BRAD	A0A318TLZ9	Rhodopseudomonas faecalis	1.1664	0.433519	7260.83	7535.55	1.03784	0.330302
Global cell cycle regulator GcrA	tr|A0A318T7L1|A0A318T7L1_9BRAD	A0A318T7L1	Rhodopseudomonas faecalis	0.7032	0.589203	5850.86	4380.3	0.748659	0.0329158
NifU-like protein involved in Fe-S cluster formation	tr|A0A318TLL4|A0A318TLL4_9BRAD	A0A318TLL4	Rhodopseudomonas faecalis	1.7853	0.037247	4666.36	8458.63	1.81268	0.0073096
Monoamine oxidase	tr|A0A318T9C8|A0A318T9C8_9BRAD	A0A318T9C8	Rhodopseudomonas faecalis	0.5618	0.321286	1167.91	1315.77	1.1266	0.35924
4-hydroxy-tetrahydrodipicolinate synthase	tr|A0A318TN46|A0A318TN46_9BRAD	A0A318TN46	Rhodopseudomonas faecalis	1.498	0.0828183	6574.86	8641.41	1.31431	0.00335454
Uncharacterized protein DUF2478	tr|A0A318TDR9|A0A318TDR9_9BRAD	A0A318TDR9	Rhodopseudomonas faecalis	3.5027	0.00900102	11652.1	29115	2.49869	0.00618309
Ribonuclease R (RNase R) (EC 3.1.13.1)	tr|A0A318TFB8|A0A318TFB8_9BRAD	A0A318TFB8	Rhodopseudomonas faecalis	1.0187	0.925844	4859.06	4403.36	0.906215	0.0996606
Putative membrane protein	tr|A0A318T9E1|A0A318T9E1_9BRAD	A0A318T9E1	Rhodopseudomonas faecalis	2.9543	0.00136267	4083.35	10878.6	2.66412	0.016336
Sporulation protein YlmC with PRC-barrel domain	tr|A0A318TBT9|A0A318TBT9_9BRAD	A0A318TBT9	Rhodopseudomonas faecalis	7.9077	8.36535e-05	12765.7	108106	8.46844	0.0310502
Catalase	tr|A0A318TIX6|A0A318TIX6_9BRAD	A0A318TIX6	Rhodopseudomonas faecalis	1.0199	0.927482	4352.32	3854.81	0.885691	0.500248
Oligoendopeptidase F	tr|A0A318TFG8|A0A318TFG8_9BRAD	A0A318TFG8	Rhodopseudomonas faecalis	0.8966	0.714938	13329	10959.9	0.822264	0.154303
Guanylate kinase (EC 2.7.4.8) (GMP kinase)	tr|A0A318TJT1|A0A318TJT1_9BRAD	A0A318TJT1	Rhodopseudomonas faecalis	1.0521	0.726851	8606.94	7835.94	0.910421	0.128845
Putative monooxygenase ydhR	tr|A0A318TL93|A0A318TL93_9BRAD	A0A318TL93	Rhodopseudomonas faecalis	2.4969	0.01177	3839.25	7511.76	1.95657	0.00428832
Lysine--tRNA ligase (EC 6.1.1.6) (Lysyl-tRNA synthetase) (LysRS)	tr|A0A318TI68|A0A318TI68_9BRAD	A0A318TI68	Rhodopseudomonas faecalis	0.8964	0.647764	7816.53	6641.81	0.849713	0.0335466
5-oxoprolinase subunit A (5-OPase subunit A) (EC 3.5.2.9) (5-oxoprolinase (ATP-hydrolyzing) subunit A)	tr|A0A318TFQ0|A0A318TFQ0_9BRAD	A0A318TFQ0	Rhodopseudomonas faecalis	1.4519	0.0792491	5219.13	6674.11	1.27878	0.0062528
Efflux pump membrane transporter	tr|A0A318TCZ3|A0A318TCZ3_9BRAD	A0A318TCZ3	Rhodopseudomonas faecalis	1.2145	0.374528	3987.28	4560.91	1.14386	0.0929119
Histidine--tRNA ligase (EC 6.1.1.21) (Histidyl-tRNA synthetase) (HisRS)	tr|A0A318TI78|A0A318TI78_9BRAD	A0A318TI78	Rhodopseudomonas faecalis	1.0028	0.989152	8299.51	10279.2	1.23853	0.560687
Ferredoxin--NADP reductase (FNR) (Fd-NADP(+) reductase) (EC 1.18.1.2)	tr|A0A318TA59|A0A318TA59_9BRAD	A0A318TA59	Rhodopseudomonas faecalis	0.7241	0.325913	33881.5	22537.9	0.665197	0.0168637
UDP-N-acetylmuramate--L-alanine ligase (EC 6.3.2.8) (UDP-N-acetylmuramoyl-L-alanine synthetase)	tr|A0A318T8H7|A0A318T8H7_9BRAD	A0A318T8H7	Rhodopseudomonas faecalis	1.0189	0.935124	5675.18	5118.33	0.901879	0.18381
NAD(P)-dependent dehydrogenase (Short-subunit alcohol dehydrogenase family)	tr|A0A318TLY5|A0A318TLY5_9BRAD	A0A318TLY5	Rhodopseudomonas faecalis	1.3613	0.151785	9470.11	11593	1.22417	0.0694156
Pyruvate dehydrogenase E1 component subunit alpha (EC 1.2.4.1)	tr|A0A318TLA6|A0A318TLA6_9BRAD	A0A318TLA6	Rhodopseudomonas faecalis	1.5451	0.180148	3026.37	3724.42	1.23066	0.078297
3-hydroxyisobutyrate dehydrogenase (HIBADH) (EC 1.1.1.31)	tr|A0A318TNC9|A0A318TNC9_9BRAD	A0A318TNC9	Rhodopseudomonas faecalis	1.206	0.28747	11290.8	12847.3	1.13785	0.185413
Uncharacterized protein (TIGR00255 family)	tr|A0A318THK8|A0A318THK8_9BRAD	A0A318THK8	Rhodopseudomonas faecalis	1.017	0.95004	12225.3	12497.3	1.02225	0.792553
Putative cold-shock DNA-binding protein	tr|A0A318TI88|A0A318TI88_9BRAD	A0A318TI88	Rhodopseudomonas faecalis	0.9393	0.828591	4104.65	3228.26	0.786488	0.0757206
Protein translocase subunit SecA (EC 7.4.2.8)	tr|A0A318TA32|A0A318TA32_9BRAD	A0A318TA32	Rhodopseudomonas faecalis	1.0851	0.656471	23698.6	25230.2	1.06463	0.606024
Sulfate transport system substrate-binding protein	tr|A0A318TC59|A0A318TC59_9BRAD	A0A318TC59	Rhodopseudomonas faecalis	0.3845	0.084711	49257.2	21344.3	0.433325	0.0159377
Cysteine synthase (EC 2.5.1.47)	tr|A0A318TAI3|A0A318TAI3_9BRAD	A0A318TAI3	Rhodopseudomonas faecalis	1.1925	0.552611	450586	475378	1.05502	0.72854
Uncharacterized protein (TIGR02284 family)	tr|A0A318TKV5|A0A318TKV5_9BRAD	A0A318TKV5	Rhodopseudomonas faecalis	2.3021	0.0370123	2313.93	2955.72	1.27736	0.198631
Methionine biosynthesis protein MetW	tr|A0A318TAV1|A0A318TAV1_9BRAD	A0A318TAV1	Rhodopseudomonas faecalis	1.1012	0.77879	3987.08	3872.52	0.971269	0.804818
Putative circularly permuted ATP-grasp superfamily protein	tr|A0A318U086|A0A318U086_9BRAD	A0A318U086	Rhodopseudomonas faecalis	1.6439	0.118998	3241.31	4533.24	1.39858	0.00809181
Proline--tRNA ligase (EC 6.1.1.15) (Prolyl-tRNA synthetase) (ProRS)	tr|A0A318TKX1|A0A318TKX1_9BRAD	A0A318TKX1	Rhodopseudomonas faecalis	1.052	0.784587	14568.5	13712.3	0.941233	0.22976
M23 family peptidase	tr|A0A318TG88|A0A318TG88_9BRAD	A0A318TG88	Rhodopseudomonas faecalis	0.8605	0.674079	2761.05	2498.67	0.904973	0.510169
Phasin family protein	tr|A0A318U0I7|A0A318U0I7_9BRAD	A0A318U0I7	Rhodopseudomonas faecalis	2.9116	0.00965381	16239.1	40476.5	2.49253	0.00130229
Nuclease PIN	tr|A0A318TNL3|A0A318TNL3_9BRAD	A0A318TNL3	Rhodopseudomonas faecalis	0.7914	0.464749	6051	3735.83	0.617391	0.001995
Chromosome segregation DNA-binding protein	tr|A0A318TBQ4|A0A318TBQ4_9BRAD	A0A318TBQ4	Rhodopseudomonas faecalis	0.9441	0.80976	12778.1	16043.4	1.25554	0.239452
NADH-quinone oxidoreductase subunit F (EC 7.1.1.-)	tr|A0A318TQY3|A0A318TQY3_9BRAD	A0A318TQY3	Rhodopseudomonas faecalis	0.8446	0.430476	6655.44	5266.18	0.791259	0.00553856
Glyoxylate reductase	tr|A0A318T8B7|A0A318T8B7_9BRAD	A0A318T8B7	Rhodopseudomonas faecalis	1.4959	0.0754258	15538.6	21146.1	1.36088	0.0446804
Outer membrane protein	tr|A0A318TR43|A0A318TR43_9BRAD	A0A318TR43	Rhodopseudomonas faecalis	0.6646	0.252794	2007.86	1418.48	0.706464	0.335369
Ribosome-recycling factor (RRF) (Ribosome-releasing factor)	tr|A0A318TKX9|A0A318TKX9_9BRAD	A0A318TKX9	Rhodopseudomonas faecalis	1.2418	0.369324	31663.6	34686	1.09545	0.389892
Poly(A) polymerase/tRNA nucleotidyltransferase (CCA-adding enzyme)	tr|A0A318TN11|A0A318TN11_9BRAD	A0A318TN11	Rhodopseudomonas faecalis	0.4237	0.0885457	8706.04	10207.3	1.17244	0.46878
Ribosome maturation factor RimP	tr|A0A318T8U8|A0A318T8U8_9BRAD	A0A318T8U8	Rhodopseudomonas faecalis	1.0947	0.640325	12414.9	12166.7	0.980009	0.777119
3-oxoacyl-[acyl-carrier-protein] synthase 2 (EC 2.3.1.179)	tr|A0A318TNE2|A0A318TNE2_9BRAD	A0A318TNE2	Rhodopseudomonas faecalis	0.924	0.742432	13350.3	12726.8	0.953299	0.374987
Ribulose-bisphosphate carboxylase large chain	tr|A0A318TRY8|A0A318TRY8_9BRAD	A0A318TRY8	Rhodopseudomonas faecalis	1.0196	0.92322	8513.69	8545.95	1.00379	0.954659
Ferredoxin	tr|A0A318TBQ1|A0A318TBQ1_9BRAD	A0A318TBQ1	Rhodopseudomonas faecalis	1.1139	0.658671	129230	127800	0.988931	0.930092
zf-like domain-containing protein	tr|A0A318TVA9|A0A318TVA9_9BRAD	A0A318TVA9	Rhodopseudomonas faecalis	1.1357	0.719151	15776.6	16558.1	1.04954	0.877799
Carbamoyl-phosphate synthase large chain (EC 6.3.5.5) (Carbamoyl-phosphate synthetase ammonia chain)	tr|A0A318TL28|A0A318TL28_9BRAD	A0A318TL28	Rhodopseudomonas faecalis	1.0495	0.763839	17208.4	16246.4	0.944095	0.498381
Putative DNA-binding ribbon-helix-helix protein	tr|A0A318T867|A0A318T867_9BRAD	A0A318T867	Rhodopseudomonas faecalis	0.391	0.00401869	11160.5	3915.3	0.350817	1.92146e-05
Dihydroxy-acid dehydratase (DAD) (EC 4.2.1.9)	tr|A0A318TQ41|A0A318TQ41_9BRAD	A0A318TQ41	Rhodopseudomonas faecalis	1.046	0.847022	22500.4	20963.4	0.931691	0.367494
Ribosomal RNA large subunit methyltransferase J (EC 2.1.1.266) (23S rRNA (adenine(2030)-N6)-methyltransferase) (23S rRNA m6A2030 methyltransferase)	tr|A0A318THV8|A0A318THV8_9BRAD	A0A318THV8	Rhodopseudomonas faecalis	1.3239	0.414091	1620.88	1785.93	1.10183	0.67699
Secondary thiamine-phosphate synthase enzyme	tr|A0A318TEG1|A0A318TEG1_9BRAD	A0A318TEG1	Rhodopseudomonas faecalis	1.3721	0.128641	6133.99	7476.93	1.21893	0.00868661
Cobyric acid synthase	tr|A0A318TGG6|A0A318TGG6_9BRAD	A0A318TGG6	Rhodopseudomonas faecalis	0.8489	0.469753	18171.3	13878.7	0.763771	0.00554469
NTE family protein	tr|A0A318TKY7|A0A318TKY7_9BRAD	A0A318TKY7	Rhodopseudomonas faecalis	2.3723	0.00180965	5389.1	8723.4	1.61871	0.0164367
Iron-sulfur cluster assembly accessory protein	tr|A0A318TUG8|A0A318TUG8_9BRAD	A0A318TUG8	Rhodopseudomonas faecalis	1.3451	0.30121	5631.21	6812.7	1.20981	0.254578
Quinol monooxygenase YgiN	tr|A0A318TJA3|A0A318TJA3_9BRAD	A0A318TJA3	Rhodopseudomonas faecalis	1.0753	0.664994	6885.24	6482.1	0.941449	0.680958
ADP-ribose pyrophosphatase	tr|A0A318TD53|A0A318TD53_9BRAD	A0A318TD53	Rhodopseudomonas faecalis	1.2738	0.188961	4631.5	5246.09	1.1327	0.0484843
DUF2059 domain-containing protein	tr|A0A318TKA6|A0A318TKA6_9BRAD	A0A318TKA6	Rhodopseudomonas faecalis	0.9222	0.812451	55294.9	45270.7	0.818713	0.311256
Enoyl-CoA hydratase	tr|A0A318TSQ1|A0A318TSQ1_9BRAD	A0A318TSQ1	Rhodopseudomonas faecalis	1.4815	0.0879322	13950.8	18387.7	1.31803	0.000790313
Enoyl-CoA hydratase/carnithine racemase	tr|A0A318TH19|A0A318TH19_9BRAD	A0A318TH19	Rhodopseudomonas faecalis	0.6734	0.118298	9830.54	7064.63	0.718641	0.00229376
5-aminolevulinate synthase (EC 2.3.1.37) (5-aminolevulinic acid synthase) (Delta-ALA synthase) (Delta-aminolevulinate synthase)	tr|A0A318TDE0|A0A318TDE0_9BRAD	A0A318TDE0	Rhodopseudomonas faecalis	0.2162	0.00140307	46530.1	8355.56	0.179573	0.0160712
Cytochrome c domain-containing protein	tr|A0A318THX5|A0A318THX5_9BRAD	A0A318THX5	Rhodopseudomonas faecalis	1.1522	0.629641	8453.75	8977.53	1.06196	0.657419
Chemotaxis protein CheZ	tr|A0A318TA67|A0A318TA67_9BRAD	A0A318TA67	Rhodopseudomonas faecalis	1.281	0.31781	4558.47	5181.39	1.13665	0.433619
Protein GrpE (HSP-70 cofactor)	tr|A0A318TCA3|A0A318TCA3_9BRAD	A0A318TCA3	Rhodopseudomonas faecalis	1.4605	0.117322	99699.9	129841	1.30232	0.0423958
aminomethyltransferase (EC 2.1.2.10) (Glycine cleavage system T protein)	tr|A0A318T7X0|A0A318T7X0_9BRAD	A0A318T7X0	Rhodopseudomonas faecalis	1.4996	0.434587	9317.32	37975.9	4.07584	0.0404708
Farnesyl-diphosphate synthase	tr|A0A318TI42|A0A318TI42_9BRAD	A0A318TI42	Rhodopseudomonas faecalis	1.0824	0.698906	34365.9	33032.3	0.961195	0.41767
Tetratricopeptide repeat protein	tr|A0A318TJV9|A0A318TJV9_9BRAD	A0A318TJV9	Rhodopseudomonas faecalis	0.6768	0.234458	10725.8	7048.98	0.657198	0.019975
Methyltransferase family protein	tr|A0A318TCG1|A0A318TCG1_9BRAD	A0A318TCG1	Rhodopseudomonas faecalis	3.9426	0.00330975	4338.75	11217.5	2.58543	4.24239e-05
Molybdopterin molybdenumtransferase (EC 2.10.1.1)	tr|A0A318TR27|A0A318TR27_9BRAD	A0A318TR27	Rhodopseudomonas faecalis	1.9403	0.0961273	3796.89	6092.88	1.6047	0.0584813
50S ribosomal protein L4	tr|A0A318TA93|A0A318TA93_9BRAD	A0A318TA93	Rhodopseudomonas faecalis	0.7974	0.40094	65248.5	45934.9	0.703999	0.0147648
Sporulation related protein	tr|A0A318TR64|A0A318TR64_9BRAD	A0A318TR64	Rhodopseudomonas faecalis	1.6729	0.101807	2039.38	2887.72	1.41598	0.0212085
Endonuclease YncB(Thermonuclease family)	tr|A0A318TBD6|A0A318TBD6_9BRAD	A0A318TBD6	Rhodopseudomonas faecalis	0.7955	0.291301	3435.29	2457.88	0.715477	0.00227632
Elongation factor Ts (EF-Ts)	tr|A0A318TNL6|A0A318TNL6_9BRAD	A0A318TNL6	Rhodopseudomonas faecalis	0.9953	0.984699	60246.8	53182.5	0.882744	0.220269
DNA-directed RNA polymerase subunit beta' (RNAP subunit beta') (EC 2.7.7.6) (RNA polymerase subunit beta') (Transcriptase subunit beta')	tr|A0A318TIJ5|A0A318TIJ5_9BRAD	A0A318TIJ5	Rhodopseudomonas faecalis	0.9112	0.699528	32556.8	26375.5	0.810137	0.0264745
30S ribosomal protein S20	tr|A0A318TN51|A0A318TN51_9BRAD	A0A318TN51	Rhodopseudomonas faecalis	0.8741	0.620863	74812	57045.5	0.762519	0.0746185
Ribosomal protein L11 methyltransferase (L11 Mtase) (EC 2.1.1.-)	tr|A0A318T9F4|A0A318T9F4_9BRAD	A0A318T9F4	Rhodopseudomonas faecalis	0.554	0.143314	5993.33	4499.07	0.75068	0.14626
Cell envelope protein	tr|A0A318TPP8|A0A318TPP8_9BRAD	A0A318TPP8	Rhodopseudomonas faecalis	1.7911	0.0493143	4904.52	7850.19	1.60061	0.0085941
Uncharacterized protein YjbJ (UPF0337 family)	tr|A0A318TAQ9|A0A318TAQ9_9BRAD	A0A318TAQ9	Rhodopseudomonas faecalis	11.8943	5.82928e-05	5926.62	72609.6	12.2514	0.0229662
Extracytoplasmic solute receptor protein (TRAP transporter)	tr|A0A318TMH5|A0A318TMH5_9BRAD	A0A318TMH5	Rhodopseudomonas faecalis	2.3105	0.00567564	31596.7	62950.2	1.9923	8.63425e-05
N5-carboxyaminoimidazole ribonucleotide synthase (N5-CAIR synthase) (EC 6.3.4.18) (5-(carboxyamino)imidazole ribonucleotide synthetase)	tr|A0A318TFF2|A0A318TFF2_9BRAD	A0A318TFF2	Rhodopseudomonas faecalis	0.7802	0.470072	20038.8	18404.3	0.918432	0.600001
N-acetyltransferase domain-containing protein	tr|A0A318TGS9|A0A318TGS9_9BRAD	A0A318TGS9	Rhodopseudomonas faecalis	0.9153	0.701666	13110.6	10779.8	0.822219	0.0888312
Histidinol-phosphate aminotransferase (EC 2.6.1.9) (Imidazole acetol-phosphate transaminase)	tr|A0A318T8F7|A0A318T8F7_9BRAD	A0A318T8F7	Rhodopseudomonas faecalis	0.7893	0.250788	16893.6	12182.1	0.721104	0.000144654
2Fe-2S ferredoxin	tr|A0A318TEE2|A0A318TEE2_9BRAD	A0A318TEE2	Rhodopseudomonas faecalis	0.9601	0.862663	42776.9	35122.7	0.821067	0.270884
Formyltetrahydrofolate deformylase (EC 3.5.1.10) (Formyl-FH(4) hydrolase)	tr|A0A318T710|A0A318T710_9BRAD	A0A318T710	Rhodopseudomonas faecalis	0.8204	0.38388	11246.7	8259.08	0.734359	0.0026479
Enoyl-CoA hydratase	tr|A0A318TLU6|A0A318TLU6_9BRAD	A0A318TLU6	Rhodopseudomonas faecalis	2.4202	0.00792873	4031.7	7953.94	1.97285	0.0187618
1-(5-phosphoribosyl)-5-[(5-phosphoribosylamino)methylideneamino] imidazole-4-carboxamide isomerase (EC 5.3.1.16) (Phosphoribosylformimino-5-aminoimidazole carboxamide ribotide isomerase)	tr|A0A318T7Z1|A0A318T7Z1_9BRAD	A0A318T7Z1	Rhodopseudomonas faecalis	0.9325	0.69274	13145.5	10869.5	0.826859	0.0218815
Diaminopimelate epimerase (DAP epimerase) (EC 5.1.1.7) (PLP-independent amino acid racemase)	tr|A0A318TC15|A0A318TC15_9BRAD	A0A318TC15	Rhodopseudomonas faecalis	1.0147	0.954403	7825.13	12411.4	1.58609	0.114233
D-alanine--D-alanine ligase (EC 6.3.2.4) (D-Ala-D-Ala ligase) (D-alanylalanine synthetase)	tr|A0A318T9M0|A0A318T9M0_9BRAD	A0A318T9M0	Rhodopseudomonas faecalis	1.0965	0.591579	5615.24	6097.32	1.08585	0.329004
Putative membrane-anchored protein	tr|A0A318TDP3|A0A318TDP3_9BRAD	A0A318TDP3	Rhodopseudomonas faecalis	1.6846	0.0105248	6330.41	8929.32	1.41054	0.00155399
Glyoxylase-like metal-dependent hydrolase (Beta-lactamase superfamily II)	tr|A0A318T8C7|A0A318T8C7_9BRAD	A0A318T8C7	Rhodopseudomonas faecalis	1.7264	0.0387553	3647.06	5514.6	1.51206	0.00370583
Squalene synthase HpnC	tr|A0A318TSP2|A0A318TSP2_9BRAD	A0A318TSP2	Rhodopseudomonas faecalis	0.8877	0.580066	7013.43	16108.1	2.29675	0.502819
Nitrogenase protein alpha chain (EC 1.18.6.1)	tr|A0A318THI9|A0A318THI9_9BRAD	A0A318THI9	Rhodopseudomonas faecalis	1.0822	0.789854	3595.61	3463.35	0.963214	0.841777
30S ribosomal protein S9	tr|A0A318TL74|A0A318TL74_9BRAD	A0A318TL74	Rhodopseudomonas faecalis	0.9581	0.832976	147613	126046	0.853894	0.0808134
dTDP-4-amino-4,6-dideoxygalactose transaminase	tr|A0A318T9I1|A0A318T9I1_9BRAD	A0A318T9I1	Rhodopseudomonas faecalis	1.2878	0.271809	4412.57	5287.01	1.19817	0.0586072
Cyclic nucleotide-binding domain-containing protein	tr|A0A318TCY3|A0A318TCY3_9BRAD	A0A318TCY3	Rhodopseudomonas faecalis	0.9579	0.894958	6134.82	5380.82	0.877095	0.313653
UDP-N-acetylglucosamine--N-acetylmuramyl-(pentapeptide) pyrophosphoryl-undecaprenol N-acetylglucosamine transferase (EC 2.4.1.227) (Undecaprenyl-PP-MurNAc-pentapeptide-UDPGlcNAc GlcNAc transferase)	tr|A0A318T896|A0A318T896_9BRAD	A0A318T896	Rhodopseudomonas faecalis	1.2236	0.272658	5167.61	5565.24	1.07695	0.405182
Periplasmic serine endoprotease DegP-like (EC 3.4.21.107)	tr|A0A318TKM6|A0A318TKM6_9BRAD	A0A318TKM6	Rhodopseudomonas faecalis	3.7221	0.00279092	9828.4	34760.6	3.53675	0.00648126
C4-dicarboxylate-binding protein DctP	tr|A0A318TKC9|A0A318TKC9_9BRAD	A0A318TKC9	Rhodopseudomonas faecalis	1.0588	0.799675	90174.7	84917.1	0.941695	0.594575
Acyl-CoA dehydrogenase	tr|A0A318TAC4|A0A318TAC4_9BRAD	A0A318TAC4	Rhodopseudomonas faecalis	1.4936	0.0368152	12777.2	13383	1.04742	0.605319
GreA/GreB family elongation factor	tr|A0A318TAQ0|A0A318TAQ0_9BRAD	A0A318TAQ0	Rhodopseudomonas faecalis	2.1328	0.0552963	9715.84	17308.5	1.78148	0.0226004
Acetoin utilization deacetylase AcuC-like enzyme	tr|A0A318TDH4|A0A318TDH4_9BRAD	A0A318TDH4	Rhodopseudomonas faecalis	1.0979	0.668343	5153.78	5022.15	0.97446	0.734898
50S ribosomal protein L23	tr|A0A318TAK3|A0A318TAK3_9BRAD	A0A318TAK3	Rhodopseudomonas faecalis	0.7665	0.344809	110775	74873.7	0.675906	0.0169147
Aminotransferase (EC 2.6.1.-)	tr|A0A318TS07|A0A318TS07_9BRAD	A0A318TS07	Rhodopseudomonas faecalis	1.178	0.474346	2907.75	3043.94	1.04684	0.5215
LuxR family two component transcriptional regulator	tr|A0A318TJI4|A0A318TJI4_9BRAD	A0A318TJI4	Rhodopseudomonas faecalis	1.0237	0.908034	5024.21	4530.94	0.901823	0.126489
Purine nucleoside phosphorylase	tr|A0A318T963|A0A318T963_9BRAD	A0A318T963	Rhodopseudomonas faecalis	0.8949	0.584808	4905.11	3930.73	0.801353	0.0992217
Gamma-glutamyl phosphate reductase (GPR) (EC 1.2.1.41) (Glutamate-5-semialdehyde dehydrogenase) (Glutamyl-gamma-semialdehyde dehydrogenase) (GSA dehydrogenase)	tr|A0A318TBV9|A0A318TBV9_9BRAD	A0A318TBV9	Rhodopseudomonas faecalis	0.8207	0.322824	9920.47	8517.69	0.858597	0.0830157
Shikimate dehydrogenase (NADP(+)) (SDH) (EC 1.1.1.25)	tr|A0A318TB50|A0A318TB50_9BRAD	A0A318TB50	Rhodopseudomonas faecalis	1.2744	0.219138	4872.92	5538.73	1.13663	0.142052
Orotate phosphoribosyltransferase (OPRT) (OPRTase) (EC 2.4.2.10)	tr|A0A318T6I4|A0A318T6I4_9BRAD	A0A318T6I4	Rhodopseudomonas faecalis	8.3158	6.34193e-05	33644.8	237479	7.05841	0.00211792
Succinate--CoA ligase [ADP-forming] subunit alpha (EC 6.2.1.5) (Succinyl-CoA synthetase subunit alpha) (SCS-alpha)	tr|A0A318TC46|A0A318TC46_9BRAD	A0A318TC46	Rhodopseudomonas faecalis	0.7087	0.330125	55137.5	34472.1	0.625202	0.0398995
Flagellin-like protein	tr|A0A318TCF6|A0A318TCF6_9BRAD	A0A318TCF6	Rhodopseudomonas faecalis	1.1142	0.639803	50756.2	51199.8	1.00874	0.938197
Light-independent protochlorophyllide reductase subunit N (DPOR subunit N) (LI-POR subunit N) (EC 1.3.7.7)	tr|A0A318TLQ0|A0A318TLQ0_9BRAD	A0A318TLQ0	Rhodopseudomonas faecalis	0.8513	0.454376	20086.4	15701.9	0.781718	0.00498027
Bifunctional enzyme IspD/IspF [Includes: 2-C-methyl-D-erythritol 4-phosphate cytidylyltransferase (EC 2.7.7.60) (4-diphosphocytidyl-2C-methyl-D-erythritol synthase) (MEP cytidylyltransferase) (MCT); 2-C-methyl-D-erythritol 2,4-cyclodiphosphate synthase (MECDP-synthase) (MECPP-synthase) (MECPS) (EC 4.6.1.12)]	tr|A0A318TQC0|A0A318TQC0_9BRAD	A0A318TQC0	Rhodopseudomonas faecalis	1.0286	0.904904	15496.8	14146.6	0.912873	0.325655
3-methylcrotonyl-CoA carboxylase alpha subunit	tr|A0A318TFT1|A0A318TFT1_9BRAD	A0A318TFT1	Rhodopseudomonas faecalis	0.765	0.185446	6816.12	5508.91	0.808217	0.0636626
Peptidoglycan-associated protein	tr|A0A318TDG5|A0A318TDG5_9BRAD	A0A318TDG5	Rhodopseudomonas faecalis	2.0846	0.141562	5281.5	8437.84	1.59762	0.180944
D-methionine transport system ATP-binding protein	tr|A0A318TKX4|A0A318TKX4_9BRAD	A0A318TKX4	Rhodopseudomonas faecalis	0.5344	0.129043	48185.3	23816.2	0.494263	0.0219532
Cystathionine beta-synthase	tr|A0A318TQH9|A0A318TQH9_9BRAD	A0A318TQH9	Rhodopseudomonas faecalis	0.4254	0.0290108	15792	6251.34	0.395855	0.000947149
(R)-citramalate synthase (EC 2.3.3.21)	tr|A0A318TK44|A0A318TK44_9BRAD	A0A318TK44	Rhodopseudomonas faecalis	0.9403	0.800358	12845.2	11187	0.870905	0.124023
Precorrin-3 methyltransferase	tr|A0A318TH52|A0A318TH52_9BRAD	A0A318TH52	Rhodopseudomonas faecalis	0.8369	0.560873	5081.17	3901.51	0.767837	0.0734025
Acyl-CoA synthetase (AMP-forming)/AMP-acid ligase II	tr|A0A318TDR3|A0A318TDR3_9BRAD	A0A318TDR3	Rhodopseudomonas faecalis	0.7223	0.47827	8278.72	9778.19	1.18112	0.577322
Tol-Pal system protein TolB	tr|A0A318TDT8|A0A318TDT8_9BRAD	A0A318TDT8	Rhodopseudomonas faecalis	0.9765	0.91424	9288.15	8004.6	0.861808	0.0401307
Peptide chain release factor 2 (RF-2)	tr|A0A318TV55|A0A318TV55_9BRAD	A0A318TV55	Rhodopseudomonas faecalis	0.9461	0.74892	7062.98	6118.25	0.866242	0.0135819
Invasion protein IalB	tr|A0A318TTH3|A0A318TTH3_9BRAD	A0A318TTH3	Rhodopseudomonas faecalis	0.9508	0.829678	7171.72	6129.92	0.854735	0.0511757
Apolipoprotein A1/A4/E domain-containing protein	tr|A0A318TCI9|A0A318TCI9_9BRAD	A0A318TCI9	Rhodopseudomonas faecalis	1.2681	0.310431	4627.4	5161.93	1.11551	0.0595145
Biotin carboxylase (EC 6.3.4.14) (Acetyl-coenzyme A carboxylase biotin carboxylase subunit A)	tr|A0A318TF40|A0A318TF40_9BRAD	A0A318TF40	Rhodopseudomonas faecalis	0.8763	0.527344	16229.8	12867.3	0.792817	0.00396485
Beta-N-acetylhexosaminidase	tr|A0A318U0T6|A0A318U0T6_9BRAD	A0A318U0T6	Rhodopseudomonas faecalis	1.2063	0.379473	6636.71	6933.09	1.04466	0.800596
Glycine/D-amino acid oxidase-like deaminating enzyme	tr|A0A318TIX5|A0A318TIX5_9BRAD	A0A318TIX5	Rhodopseudomonas faecalis	3.0214	0.000373026	3817.64	4625.81	1.21169	0.478729
Membrane fusion protein (Multidrug efflux system)	tr|A0A318TG42|A0A318TG42_9BRAD	A0A318TG42	Rhodopseudomonas faecalis	2.031	0.0173105	8470.56	14996.6	1.77043	0.00290042
Uncharacterized protein DUF642	tr|A0A318T795|A0A318T795_9BRAD	A0A318T795	Rhodopseudomonas faecalis	1.2181	0.561518	1480.5	1746.66	1.17978	0.283521
ATP-binding protein Uup (EC 3.6.1.-)	tr|A0A318TU40|A0A318TU40_9BRAD	A0A318TU40	Rhodopseudomonas faecalis	1.1883	0.342303	4403.18	4187.43	0.951002	0.495775
MoxR-like ATPase	tr|A0A318TBI4|A0A318TBI4_9BRAD	A0A318TBI4	Rhodopseudomonas faecalis	1.5579	0.040377	5403.83	7211.56	1.33453	0.00912599
CubicO group peptidase (Beta-lactamase class C family)	tr|A0A318TE38|A0A318TE38_9BRAD	A0A318TE38	Rhodopseudomonas faecalis	1.398	0.236926	25372.1	29728.7	1.17171	0.360544
Phosphoribosylformylglycinamidine cyclo-ligase (EC 6.3.3.1) (AIR synthase) (AIRS) (Phosphoribosyl-aminoimidazole synthetase)	tr|A0A318TNF7|A0A318TNF7_9BRAD	A0A318TNF7	Rhodopseudomonas faecalis	1.0364	0.877948	10500.3	9695.02	0.923308	0.32912
Acetyl-CoA synthetase	tr|A0A318T6F2|A0A318T6F2_9BRAD	A0A318T6F2	Rhodopseudomonas faecalis	2.0521	0.0954545	3402.49	5291.18	1.55509	0.0586925
Probable GTP-binding protein EngB	tr|A0A318TAY6|A0A318TAY6_9BRAD	A0A318TAY6	Rhodopseudomonas faecalis	0.7824	0.484919	5575.73	4903.12	0.879368	0.231931
prephenate dehydratase (EC 4.2.1.51)	tr|A0A318TIU0|A0A318TIU0_9BRAD	A0A318TIU0	Rhodopseudomonas faecalis	0.836	0.509618	6704.85	5028.42	0.749967	0.0576325
Probable cytosol aminopeptidase (EC 3.4.11.1) (Leucine aminopeptidase) (LAP) (EC 3.4.11.10) (Leucyl aminopeptidase)	tr|A0A318THL5|A0A318THL5_9BRAD	A0A318THL5	Rhodopseudomonas faecalis	0.9677	0.884836	9089.12	8118.34	0.893194	0.314672
ATP diphosphatase	tr|A0A318TJC3|A0A318TJC3_9BRAD	A0A318TJC3	Rhodopseudomonas faecalis	1.443	0.054531	5081.27	6318.81	1.24355	0.0552996
50S ribosomal protein L11	tr|A0A318TCU3|A0A318TCU3_9BRAD	A0A318TCU3	Rhodopseudomonas faecalis	0.781	0.309963	102354	71580.1	0.69934	0.00592535
Glutathione synthetase (EC 6.3.2.3) (GSH synthetase) (GSH-S) (GSHase) (Glutathione synthase)	tr|A0A318TB18|A0A318TB18_9BRAD	A0A318TB18	Rhodopseudomonas faecalis	1.3788	0.152746	8246.61	9297.76	1.12746	0.164142
Coenzyme F420 hydrogenase subunit beta	tr|A0A318TDC5|A0A318TDC5_9BRAD	A0A318TDC5	Rhodopseudomonas faecalis	0.8756	0.556233	7242.01	6056.71	0.83633	0.0422635
CENP-V/GFA domain-containing protein	tr|A0A318TM02|A0A318TM02_9BRAD	A0A318TM02	Rhodopseudomonas faecalis	0.9911	0.974415	2978.21	2511.85	0.843409	0.2146
Acetyl-coenzyme A synthetase (AcCoA synthetase) (Acs) (EC 6.2.1.1) (Acetate--CoA ligase) (Acyl-activating enzyme)	tr|A0A318TJ62|A0A318TJ62_9BRAD	A0A318TJ62	Rhodopseudomonas faecalis	0.9921	0.975727	22591.3	19939.4	0.882612	0.337376
Glycine oxidase	tr|A0A318TAN2|A0A318TAN2_9BRAD	A0A318TAN2	Rhodopseudomonas faecalis	0.4461	0.0123034	6259.11	2950.95	0.471464	0.000937109
Cell division protein ZapA	tr|A0A318TGM4|A0A318TGM4_9BRAD	A0A318TGM4	Rhodopseudomonas faecalis	1.1516	0.487902	2668.95	2763.5	1.03543	0.61578
Amino acid/amide ABC transporter substrate-binding protein (HAAT family)	tr|A0A318TGA6|A0A318TGA6_9BRAD	A0A318TGA6	Rhodopseudomonas faecalis	1.2021	0.303115	12064.7	11630.1	0.963981	0.85919
Chlorophyllide reductase subunit Y	tr|A0A318TI74|A0A318TI74_9BRAD	A0A318TI74	Rhodopseudomonas faecalis	0.7013	0.127342	12826.4	7908.56	0.616586	0.00909817
geranylgeranyl diphosphate reductase (EC 1.3.1.83) (Geranylgeranyl reductase)	tr|A0A318TI85|A0A318TI85_9BRAD	A0A318TI85	Rhodopseudomonas faecalis	0.779	0.28187	12463.1	9060.21	0.726962	0.0705569
Long-chain acyl-CoA synthetase	tr|A0A318T827|A0A318T827_9BRAD	A0A318T827	Rhodopseudomonas faecalis	0.6336	0.104021	9411.32	7530.79	0.800185	0.717264
Flagellum-specific ATP synthase (EC 7.1.2.2)	tr|A0A318T737|A0A318T737_9BRAD	A0A318T737	Rhodopseudomonas faecalis	0.9477	0.878836	2687.54	2562.23	0.953376	0.792757
Glutamine synthetase (EC 6.3.1.2)	tr|A0A318TNH2|A0A318TNH2_9BRAD	A0A318TNH2	Rhodopseudomonas faecalis	1.7127	0.0264467	66412.5	102092	1.53724	0.00558295
Pyridoxal phosphate homeostasis protein (PLP homeostasis protein)	tr|A0A318TCR9|A0A318TCR9_9BRAD	A0A318TCR9	Rhodopseudomonas faecalis	0.7715	0.466561	4929.26	3477.25	0.705431	0.1514
Indolepyruvate ferredoxin oxidoreductase beta subunit	tr|A0A318TR49|A0A318TR49_9BRAD	A0A318TR49	Rhodopseudomonas faecalis	0.7566	0.23942	11101	7527.74	0.678113	0.0154932
Hydroxyacylglutathione hydrolase (EC 3.1.2.6) (Glyoxalase II) (Glx II)	tr|A0A318TA13|A0A318TA13_9BRAD	A0A318TA13	Rhodopseudomonas faecalis	1.102	0.625715	8435.73	8319.21	0.986187	0.832631
Thiamine-phosphate synthase (EC 2.5.1.3) (Thiamine-phosphate pyrophosphorylase)	tr|A0A318T7Y0|A0A318T7Y0_9BRAD	A0A318T7Y0	Rhodopseudomonas faecalis	0.755	0.419518	11992.7	7725.99	0.644225	0.0444344
Alcohol dehydrogenase	tr|A0A318THW6|A0A318THW6_9BRAD	A0A318THW6	Rhodopseudomonas faecalis	1.0009	0.995841	6044.77	5345.09	0.884251	0.23703
serine-type D-Ala-D-Ala carboxypeptidase (EC 3.4.16.4)	tr|A0A318TGU6|A0A318TGU6_9BRAD	A0A318TGU6	Rhodopseudomonas faecalis	1.1485	0.621605	1864.27	1924.7	1.03242	0.832285
Acetolactate synthase-1/2/3 large subunit	tr|A0A318T8J2|A0A318T8J2_9BRAD	A0A318T8J2	Rhodopseudomonas faecalis	1.1857	0.376979	3715.36	3867.73	1.04101	0.747453
Cystathionine gamma-lyase	tr|A0A318U048|A0A318U048_9BRAD	A0A318U048	Rhodopseudomonas faecalis	1.2577	0.441617	85700.5	94351.5	1.10094	0.578394
Flagellin	tr|A0A318TBE8|A0A318TBE8_9BRAD	A0A318TBE8	Rhodopseudomonas faecalis	0.9279	0.781538	34110.3	28020.8	0.821476	0.160875
Winged helix family two component transcriptional regulator	tr|A0A318TI08|A0A318TI08_9BRAD	A0A318TI08	Rhodopseudomonas faecalis	1.3159	0.262752	15018.6	17726.6	1.18031	0.17041
2-octaprenylphenol hydroxylase	tr|A0A318TCR5|A0A318TCR5_9BRAD	A0A318TCR5	Rhodopseudomonas faecalis	1.2268	0.705934	2106.15	1683.91	0.799518	0.276423
O-acetylhomoserine sulfhydrylase	tr|A0A318THB0|A0A318THB0_9BRAD	A0A318THB0	Rhodopseudomonas faecalis	1.1832	0.520788	19128.4	20044.7	1.0479	0.644933
exopolyphosphatase (EC 3.6.1.11)	tr|A0A318TUR8|A0A318TUR8_9BRAD	A0A318TUR8	Rhodopseudomonas faecalis	1.0281	0.888455	4670.56	4640.13	0.993485	0.907587
Acetolactate synthase small subunit (AHAS) (ALS) (EC 2.2.1.6) (Acetohydroxy-acid synthase small subunit)	tr|A0A318T9I4|A0A318T9I4_9BRAD	A0A318T9I4	Rhodopseudomonas faecalis	1.7317	0.0255133	56983.1	87479.9	1.53519	0.000503028
Alkylphosphonate utilization operon protein PhnA	tr|A0A318THC7|A0A318THC7_9BRAD	A0A318THC7	Rhodopseudomonas faecalis	0.7866	0.338727	14406	9821.35	0.681755	0.0572019
3-hydroxyisobutyrate dehydrogenase	tr|A0A318TT97|A0A318TT97_9BRAD	A0A318TT97	Rhodopseudomonas faecalis	1.4932	0.0596749	7478.36	9675.67	1.29382	0.0129502
Protein FixC	tr|A0A318TK39|A0A318TK39_9BRAD	A0A318TK39	Rhodopseudomonas faecalis	0.8613	0.552805	4789.51	3369.33	0.703482	0.0356077
phosphoenolpyruvate--protein phosphotransferase (EC 2.7.3.9)	tr|A0A318T8X6|A0A318T8X6_9BRAD	A0A318T8X6	Rhodopseudomonas faecalis	1.0939	0.685897	4560.01	4723.55	1.03586	0.531796
Bifunctional glutamine synthetase adenylyltransferase/adenylyl-removing enzyme (ATP:glutamine synthetase adenylyltransferase) (ATase) [Includes: Glutamine synthetase adenylyl-L-tyrosine phosphorylase (EC 2.7.7.89) (Adenylyl removase) (AR) (AT-N); Glutamine synthetase adenylyl transferase (EC 2.7.7.42) (Adenylyl transferase) (AT) (AT-C)]	tr|A0A318TJS7|A0A318TJS7_9BRAD	A0A318TJS7	Rhodopseudomonas faecalis	1.2501	0.646681	4712.15	4174	0.885796	0.277113
DNA-directed RNA polymerase subunit alpha (RNAP subunit alpha) (EC 2.7.7.6) (RNA polymerase subunit alpha) (Transcriptase subunit alpha)	tr|A0A318T985|A0A318T985_9BRAD	A0A318T985	Rhodopseudomonas faecalis	0.9067	0.710061	67705.2	53910.2	0.79625	0.0648292
Acetyl-coenzyme A carboxylase carboxyl transferase subunit alpha (ACCase subunit alpha) (Acetyl-CoA carboxylase carboxyltransferase subunit alpha) (EC 2.1.3.15)	tr|A0A318T7Y9|A0A318T7Y9_9BRAD	A0A318T7Y9	Rhodopseudomonas faecalis	0.7253	0.273732	16124.1	10398.1	0.644877	0.0157247
Pimeloyl-ACP methyl ester carboxylesterase	tr|A0A318TCG5|A0A318TCG5_9BRAD	A0A318TCG5	Rhodopseudomonas faecalis	1.854	0.0292971	5880.05	10598.3	1.80241	0.0186702
Energy-dependent translational throttle protein EttA (EC 3.6.1.-) (Translational regulatory factor EttA)	tr|A0A318TMM2|A0A318TMM2_9BRAD	A0A318TMM2	Rhodopseudomonas faecalis	0.8282	0.425032	16810.4	11580.8	0.68891	0.0081712
Amino acid/amide ABC transporter substrate-binding protein (HAAT family)	tr|A0A318TYT5|A0A318TYT5_9BRAD	A0A318TYT5	Rhodopseudomonas faecalis	2.5108	0.032732	44357.5	93812.4	2.11492	0.0156997
NADH-quinone oxidoreductase subunit C/D (EC 7.1.1.-) (NADH dehydrogenase I subunit C/D) (NDH-1 subunit C/D)	tr|A0A318TAM8|A0A318TAM8_9BRAD	A0A318TAM8	Rhodopseudomonas faecalis	0.9208	0.831241	3187.25	2632.87	0.826063	0.383092
Signal recognition particle protein (Fifty-four homolog)	tr|A0A318TAY8|A0A318TAY8_9BRAD	A0A318TAY8	Rhodopseudomonas faecalis	0.9732	0.888502	8368.88	7698.18	0.919858	0.533736
Cystathionine beta-lyase	tr|A0A318TM62|A0A318TM62_9BRAD	A0A318TM62	Rhodopseudomonas faecalis	1.1746	0.367554	8906.97	9230.76	1.03635	0.506906
DNA polymerase I (EC 2.7.7.7)	tr|A0A318T6R5|A0A318T6R5_9BRAD	A0A318T6R5	Rhodopseudomonas faecalis	0.7989	0.431845	3167.47	2713.66	0.856725	0.27651
phosphoglucomutase (alpha-D-glucose-1,6-bisphosphate-dependent) (EC 5.4.2.2)	tr|A0A318TI34|A0A318TI34_9BRAD	A0A318TI34	Rhodopseudomonas faecalis	1.0949	0.641754	9253.87	8569.97	0.926096	0.284547
Alpha-galactosidase	tr|A0A318T9R2|A0A318T9R2_9BRAD	A0A318T9R2	Rhodopseudomonas faecalis	0.8747	0.680409	4104.58	4141.28	1.00894	0.967052
Phosphocarrier protein	tr|A0A318TKW8|A0A318TKW8_9BRAD	A0A318TKW8	Rhodopseudomonas faecalis	0.9238	0.686434	10768.3	8807.21	0.81788	0.006552
Vitamin B12-dependent ribonucleotide reductase (EC 1.17.4.1)	tr|A0A318TNG0|A0A318TNG0_9BRAD	A0A318TNG0	Rhodopseudomonas faecalis	0.2236	0.00446094	4009.59	1314.62	0.327869	0.0110759
Lipopolysaccharide export system protein LptA	tr|A0A318TRX7|A0A318TRX7_9BRAD	A0A318TRX7	Rhodopseudomonas faecalis	0.2185	0.0267324	4008.12	1898.57	0.473682	0.0061695
Bifunctional protein GlmU [Includes: UDP-N-acetylglucosamine pyrophosphorylase (EC 2.7.7.23) (N-acetylglucosamine-1-phosphate uridyltransferase); Glucosamine-1-phosphate N-acetyltransferase (EC 2.3.1.157)]	tr|A0A318TGF7|A0A318TGF7_9BRAD	A0A318TGF7	Rhodopseudomonas faecalis	1.1066	0.672905	#VALUE!	4754.31	#VALUE!	#VALUE!
L,D-transpeptidase-like protein	tr|A0A318T8G1|A0A318T8G1_9BRAD	A0A318T8G1	Rhodopseudomonas faecalis	0.3741	0.0578112	3542.4	5803.43	1.63828	0.123214
Ribonuclease D (RNase D) (EC 3.1.13.5)	tr|A0A318THY5|A0A318THY5_9BRAD	A0A318THY5	Rhodopseudomonas faecalis	0.7913	0.0705616	8001.53	6737.42	0.842017	0.303016
Glycolate oxidase	tr|A0A318TE41|A0A318TE41_9BRAD	A0A318TE41	Rhodopseudomonas faecalis	1.5946	0.0792484	3626	5075.33	1.39971	0.007101
D-methionine transport system substrate-binding protein	tr|A0A318TG34|A0A318TG34_9BRAD	A0A318TG34	Rhodopseudomonas faecalis	1.6256	0.356433	480454	819395	1.70546	0.155116
Adenosine 5'-phosphosulfate reductase (APS reductase) (EC 1.8.4.10) (5'-adenylylsulfate reductase) (Thioredoxin-dependent 5'-adenylylsulfate reductase)	tr|A0A318TL79|A0A318TL79_9BRAD	A0A318TL79	Rhodopseudomonas faecalis	0.8884	0.677529	5311.94	4281.77	0.806065	0.211499
Microcin C transport system ATP-binding protein	tr|A0A318TEZ2|A0A318TEZ2_9BRAD	A0A318TEZ2	Rhodopseudomonas faecalis	1.0393	0.883134	2818.24	2453.24	0.870486	0.112187
2-octaprenyl-6-methoxyphenol hydroxylase /2-octaprenyl-3-methyl-6-methoxy-1,4-benzoquinol hydroxylase	tr|A0A318TKJ8|A0A318TKJ8_9BRAD	A0A318TKJ8	Rhodopseudomonas faecalis	1.5249	0.126413	10527.3	14368	1.36483	0.00126867
2-dehydropantoate 2-reductase (EC 1.1.1.169) (Ketopantoate reductase)	tr|A0A318TZA8|A0A318TZA8_9BRAD	A0A318TZA8	Rhodopseudomonas faecalis	1.9245	0.0193544	4029.23	6410.68	1.59105	0.00503386
3-oxoacyl-[acyl-carrier-protein] synthase II	tr|A0A318TJP7|A0A318TJP7_9BRAD	A0A318TJP7	Rhodopseudomonas faecalis	0.8473	0.59566	7546.9	7059.51	0.935418	0.566126
Diaminopimelate decarboxylase (DAP decarboxylase) (DAPDC) (EC 4.1.1.20)	tr|A0A318T931|A0A318T931_9BRAD	A0A318T931	Rhodopseudomonas faecalis	0.7306	0.38648	7064.33	4533.75	0.64178	0.0467015
2-dehydro-3-deoxyphosphooctonate aldolase (EC 2.5.1.55) (3-deoxy-D-manno-octulosonic acid 8-phosphate synthase) (KDO-8-phosphate synthase) (KDO 8-P synthase) (KDOPS) (Phospho-2-dehydro-3-deoxyoctonate aldolase)	tr|A0A318TNR0|A0A318TNR0_9BRAD	A0A318TNR0	Rhodopseudomonas faecalis	1.0423	0.796149	6593.94	6072.41	0.920907	0.24055
Glutamate synthase (NADH) small subunit	tr|A0A318TL61|A0A318TL61_9BRAD	A0A318TL61	Rhodopseudomonas faecalis	0.7176	0.239538	14829.1	10015.9	0.675425	0.0200399
Acetyl-CoA C-acetyltransferase	tr|A0A318TGV6|A0A318TGV6_9BRAD	A0A318TGV6	Rhodopseudomonas faecalis	1.29	0.302523	3977.87	2673.07	0.671986	0.310534
NADH dehydrogenase subunit E	tr|A0A318TKZ3|A0A318TKZ3_9BRAD	A0A318TKZ3	Rhodopseudomonas faecalis	1.1562	0.515442	4608.54	4670.62	1.01347	0.873107
Signal transduction histidine kinase	tr|A0A318TNW9|A0A318TNW9_9BRAD	A0A318TNW9	Rhodopseudomonas faecalis	1.3299	0.297459	2977.44	3452.33	1.15949	0.268265
Aconitate hydratase (Aconitase) (EC 4.2.1.3)	tr|A0A318TJS6|A0A318TJS6_9BRAD	A0A318TJS6	Rhodopseudomonas faecalis	1.0952	0.682944	59318.2	57550.9	0.970207	0.641733
Glutamate synthase (NADH) large subunit	tr|A0A318TIA8|A0A318TIA8_9BRAD	A0A318TIA8	Rhodopseudomonas faecalis	0.7939	0.364411	12819.4	8903.62	0.694544	0.0197854
Precorrin-8X methylmutase	tr|A0A318TJ48|A0A318TJ48_9BRAD	A0A318TJ48	Rhodopseudomonas faecalis	0.8416	0.474934	11654.3	8577.97	0.736033	0.0492183
Elongation factor G	tr|A0A318TGQ5|A0A318TGQ5_9BRAD	A0A318TGQ5	Rhodopseudomonas faecalis	0.4587	0.0394848	12562.8	6004.2	0.477934	0.000555482
Sulfate adenylyltransferase subunit 2 (EC 2.7.7.4) (ATP-sulfurylase small subunit) (Sulfate adenylate transferase)	tr|A0A318TFS6|A0A318TFS6_9BRAD	A0A318TFS6	Rhodopseudomonas faecalis	0.8315	0.454362	33162.2	25082.4	0.756356	0.0170208
Citronellyl-CoA dehydrogenase	tr|A0A318TN45|A0A318TN45_9BRAD	A0A318TN45	Rhodopseudomonas faecalis	0.7208	0.123606	1919.56	1622.44	0.845214	0.208048
Methylmalonyl-CoA mutase /heterodimeric methylmalonyl-CoA mutase large subunit	tr|A0A318TJL3|A0A318TJL3_9BRAD	A0A318TJL3	Rhodopseudomonas faecalis	0.4404	0.0232484	7634.8	4029.32	0.527757	0.00280464
Pyruvate-ferredoxin/flavodoxin oxidoreductase	tr|A0A318TI59|A0A318TI59_9BRAD	A0A318TI59	Rhodopseudomonas faecalis	0.7096	0.213884	92994.8	58466.2	0.628704	0.00357843
O-acetylhomoserine sulfhydrylase	tr|A0A318TA82|A0A318TA82_9BRAD	A0A318TA82	Rhodopseudomonas faecalis	1.1787	0.676128	231834	245528	1.05907	0.821628
Succinate dehydrogenase iron-sulfur subunit (EC 1.3.5.1)	tr|A0A318T8R0|A0A318T8R0_9BRAD	A0A318T8R0	Rhodopseudomonas faecalis	1.0865	0.712503	28660.9	27780.3	0.969273	0.656999
Leucine--tRNA ligase (EC 6.1.1.4) (Leucyl-tRNA synthetase) (LeuRS)	tr|A0A318TH55|A0A318TH55_9BRAD	A0A318TH55	Rhodopseudomonas faecalis	0.9077	0.617469	12099	9815.98	0.811304	0.000832644
Outer membrane protein assembly factor BamA	tr|A0A318TNK5|A0A318TNK5_9BRAD	A0A318TNK5	Rhodopseudomonas faecalis	0.7572	0.319455	5280.01	3686.32	0.698166	0.0180074
tRNA N6-adenosine threonylcarbamoyltransferase (EC 2.3.1.234) (N6-L-threonylcarbamoyladenine synthase) (t(6)A synthase) (t(6)A37 threonylcarbamoyladenosine biosynthesis protein TsaD) (tRNA threonylcarbamoyladenosine biosynthesis protein TsaD)	tr|A0A318TAA2|A0A318TAA2_9BRAD	A0A318TAA2	Rhodopseudomonas faecalis	0.7837	0.47204	5030.33	3682.25	0.73201	0.137817
Phosphoribosylformylglycinamidine synthase subunit PurQ (FGAM synthase) (EC 6.3.5.3) (Formylglycinamide ribonucleotide amidotransferase subunit I) (FGAR amidotransferase I) (FGAR-AT I) (Glutaminase PurQ) (EC 3.5.1.2) (Phosphoribosylformylglycinamidine synthase subunit I)	tr|A0A318TAL2|A0A318TAL2_9BRAD	A0A318TAL2	Rhodopseudomonas faecalis	0.9024	0.601631	14506.1	11701.5	0.806657	0.0026455
Serine acetyltransferase (EC 2.3.1.30)	tr|A0A318TKB8|A0A318TKB8_9BRAD	A0A318TKB8	Rhodopseudomonas faecalis	1.0125	0.95603	3250.3	2976.01	0.915612	0.545229
Ribosome maturation factor RimM	tr|A0A318TC81|A0A318TC81_9BRAD	A0A318TC81	Rhodopseudomonas faecalis	0.81	0.271592	4427.92	3237.9	0.731246	0.036278
RND family efflux transporter MFP subunit	tr|A0A318TTB8|A0A318TTB8_9BRAD	A0A318TTB8	Rhodopseudomonas faecalis	0.9213	0.676232	2742.17	2430.72	0.886421	0.0698521
Citrate synthase	tr|A0A318TKR2|A0A318TKR2_9BRAD	A0A318TKR2	Rhodopseudomonas faecalis	1.5695	0.356889	1965.47	3265.05	1.6612	0.0637881
Acyl-CoA dehydrogenase	tr|A0A318TDR0|A0A318TDR0_9BRAD	A0A318TDR0	Rhodopseudomonas faecalis	1.1503	0.66982	4502.23	3787.15	0.841172	0.511951
NADH-quinone oxidoreductase (EC 7.1.1.-)	tr|A0A318U0K5|A0A318U0K5_9BRAD	A0A318U0K5	Rhodopseudomonas faecalis	1.0354	0.863496	7403.46	6992.77	0.944527	0.217176
pre-crRNA processing endonuclease (EC 3.1.-.-)	tr|A0A318THU9|A0A318THU9_9BRAD	A0A318THU9	Rhodopseudomonas faecalis	1.2443	0.338019	2251.92	2187.41	0.971356	0.584477
3-oxoadipyl-CoA thiolase (EC 2.3.1.174)	tr|A0A318TBW6|A0A318TBW6_9BRAD	A0A318TBW6	Rhodopseudomonas faecalis	1.2038	0.461062	3214.93	3578.46	1.11308	0.300448
UDP-N-acetylmuramoylalanine--D-glutamate ligase (EC 6.3.2.9) (D-glutamic acid-adding enzyme) (UDP-N-acetylmuramoyl-L-alanyl-D-glutamate synthetase)	tr|A0A318T9H8|A0A318T9H8_9BRAD	A0A318T9H8	Rhodopseudomonas faecalis	1.1059	0.618807	4838.55	4662.86	0.963689	0.790411
LuxR family two component transcriptional regulator	tr|A0A318TDB6|A0A318TDB6_9BRAD	A0A318TDB6	Rhodopseudomonas faecalis	0.1835	0.000385838	5449.61	3043.16	0.558418	0.00271511
Zinc protease	tr|A0A318TH30|A0A318TH30_9BRAD	A0A318TH30	Rhodopseudomonas faecalis	1.5222	0.0940117	4932.01	6729.92	1.36454	0.0191829
Nitrogenase iron protein (EC 1.18.6.1) (Nitrogenase Fe protein) (Nitrogenase component II) (Nitrogenase reductase)	tr|A0A318TK62|A0A318TK62_9BRAD	A0A318TK62	Rhodopseudomonas faecalis	0.895	0.720014	6300.51	4678.42	0.742546	0.145174
Zinc protease	tr|A0A318TQ15|A0A318TQ15_9BRAD	A0A318TQ15	Rhodopseudomonas faecalis	1.1683	0.543967	3993.73	4125.17	1.03291	0.80311
ATP synthase subunit alpha (EC 7.1.2.2) (ATP synthase F1 sector subunit alpha) (F-ATPase subunit alpha)	tr|A0A318T9I3|A0A318T9I3_9BRAD	A0A318T9I3	Rhodopseudomonas faecalis	1.0477	0.848071	176624	163709	0.926882	0.44441
2,3,4,5-tetrahydropyridine-2,6-dicarboxylate N-succinyltransferase (EC 2.3.1.117) (Tetrahydrodipicolinate N-succinyltransferase) (THDP succinyltransferase) (THP succinyltransferase) (Tetrahydropicolinate succinylase)	tr|A0A318T6Z1|A0A318T6Z1_9BRAD	A0A318T6Z1	Rhodopseudomonas faecalis	1.4969	0.132954	30373.3	37280.9	1.22742	0.0437701
Carbon-monoxide dehydrogenase medium subunit	tr|A0A318T8A2|A0A318T8A2_9BRAD	A0A318T8A2	Rhodopseudomonas faecalis	1.3424	0.18817	8160.59	9929.75	1.21679	0.174081
Glutamine amidotransferase-like protein	tr|A0A318TIP1|A0A318TIP1_9BRAD	A0A318TIP1	Rhodopseudomonas faecalis	0.91	0.638581	2660.03	2114.01	0.794732	0.0176786
Peptidyl-prolyl cis-trans isomerase (EC 5.2.1.8)	tr|A0A318TLD3|A0A318TLD3_9BRAD	A0A318TLD3	Rhodopseudomonas faecalis	0.9502	0.843027	37408.4	31843.8	0.851246	0.16283
3-methylcrotonyl-CoA carboxylase beta subunit	tr|A0A318TNQ3|A0A318TNQ3_9BRAD	A0A318TNQ3	Rhodopseudomonas faecalis	1.0114	0.950102	5230.03	4612.16	0.881862	0.0282354
23S rRNA m(5)U-1939 methyltransferase	tr|A0A318TFX4|A0A318TFX4_9BRAD	A0A318TFX4	Rhodopseudomonas faecalis	0.7365	0.396441	2655.74	2039.1	0.767807	0.0219835
LysR family transcriptional regulator	tr|A0A318TSC4|A0A318TSC4_9BRAD	A0A318TSC4	Rhodopseudomonas faecalis	1.039	0.871171	6384.71	6110.84	0.957106	0.623982
AhpD family alkylhydroperoxidase	tr|A0A318TJR7|A0A318TJR7_9BRAD	A0A318TJR7	Rhodopseudomonas faecalis	1.1665	0.607724	19422.5	20203.5	1.04021	0.789161
Methyl-accepting chemotaxis sensory transducer_x000D_ Methyl-accepting chemotaxis sensory transducer	tr|A0A318TGR6|A0A318TGR6_9BRAD / tr|A0A318TKZ6|A0A318TKZ6_9BRAD	A0A318TGR6 / A0A318TKZ6	Rhodopseudomonas faecalis	0.5176	0.245587	3332.21	1839.78	0.552122	0.17638
LuxR family two component transcriptional regulator	tr|A0A318TGR7|A0A318TGR7_9BRAD	A0A318TGR7	Rhodopseudomonas faecalis	1.028	0.88668	12054.4	12181.6	1.01055	0.940553
NAD-dependent deacetylase	tr|A0A318TF44|A0A318TF44_9BRAD	A0A318TF44	Rhodopseudomonas faecalis	0.7339	0.1298	5804.38	4373.34	0.753455	0.198429
PPK2 family polyphosphate:nucleotide phosphotransferase	tr|A0A318TQH1|A0A318TQH1_9BRAD	A0A318TQH1	Rhodopseudomonas faecalis	2.4651	0.127163	4309.8	4822.99	1.11908	0.474714
protein-glutamate O-methyltransferase (EC 2.1.1.80)	tr|A0A318TU98|A0A318TU98_9BRAD	A0A318TU98	Rhodopseudomonas faecalis	0.5969	0.429492	2249.66	2061.82	0.916501	0.734226
Phage repressor protein C with HTH and peptisase S24 domain	tr|A0A318TRN0|A0A318TRN0_9BRAD	A0A318TRN0	Rhodopseudomonas faecalis	1.5684	0.0402385	7695.77	8713.11	1.13219	0.287062
Xre family transcriptional regulator	tr|A0A318TCA2|A0A318TCA2_9BRAD	A0A318TCA2	Rhodopseudomonas faecalis	2.2947	0.00424275	1036.65	1624.63	1.56719	0.0241544
Glutathione hydrolase proenzyme (EC 2.3.2.2) (EC 3.4.19.13) [Cleaved into: Glutathione hydrolase large chain; Glutathione hydrolase small chain]	tr|A0A318T9Q5|A0A318T9Q5_9BRAD	A0A318T9Q5	Rhodopseudomonas faecalis	1.2067	0.328311	4890.67	4449.21	0.909735	0.74241
Nif-specific regulatory protein	tr|A0A318TK71|A0A318TK71_9BRAD	A0A318TK71	Rhodopseudomonas faecalis	4.3993	0.0770635	1569.61	1939.58	1.2357	0.387942
Elongation factor G (EF-G)	tr|A0A318TPT2|A0A318TPT2_9BRAD	A0A318TPT2	Rhodopseudomonas faecalis	0.8694	0.608421	64341.3	48986	0.761347	0.0569528
UDP-glucose 6-dehydrogenase (EC 1.1.1.22)	tr|A0A318T7B7|A0A318T7B7_9BRAD	A0A318T7B7	Rhodopseudomonas faecalis	0.8279	0.374986	7446.5	5744.03	0.771372	0.0195077
Putative NAD(P)H nitroreductase (EC 1.-.-.-)	tr|A0A318TN89|A0A318TN89_9BRAD	A0A318TN89	Rhodopseudomonas faecalis	0.9255	0.706462	15183.9	13376.4	0.880957	0.0568574
ATP synthase subunit delta (ATP synthase F(1) sector subunit delta) (F-type ATPase subunit delta) (F-ATPase subunit delta)	tr|A0A318T806|A0A318T806_9BRAD	A0A318T806	Rhodopseudomonas faecalis	1.0217	0.928975	61260.7	56184.3	0.917135	0.406947
Winged helix family two component transcriptional regulator	tr|A0A318TCI4|A0A318TCI4_9BRAD	A0A318TCI4	Rhodopseudomonas faecalis	2.4567	0.0146082	13107.3	27861.8	2.12567	0.00511141
Amino acid/amide ABC transporter substrate-binding protein (HAAT family)	tr|A0A318TIK0|A0A318TIK0_9BRAD	A0A318TIK0	Rhodopseudomonas faecalis	0.8757	0.636903	29724.9	27248.8	0.9167	0.223047
uroporphyrinogen-III C-methyltransferase (EC 2.1.1.107)	tr|A0A318TET5|A0A318TET5_9BRAD	A0A318TET5	Rhodopseudomonas faecalis	0.7517	0.048189	3908.58	2603.14	0.666008	0.0155794
Biotin synthase (EC 2.8.1.6)	tr|A0A318U038|A0A318U038_9BRAD	A0A318U038	Rhodopseudomonas faecalis	0.5096	0.0117698	5465.18	2736.09	0.500641	0.000444145
UDP-N-acetyl-2-amino-2-deoxyglucuronate dehydrogenase	tr|A0A318TPZ9|A0A318TPZ9_9BRAD	A0A318TPZ9	Rhodopseudomonas faecalis	0.8155	0.47129	4473.98	3625.99	0.810462	0.036061
propionyl-CoA carboxylase (EC 6.4.1.3)	tr|A0A318TF87|A0A318TF87_9BRAD	A0A318TF87	Rhodopseudomonas faecalis	0.6639	0.184837	31886.2	18992.1	0.59562	0.00992092
Putative tellurite resistance protein B-like protein	tr|A0A318TAZ4|A0A318TAZ4_9BRAD	A0A318TAZ4	Rhodopseudomonas faecalis	2.7758	0.0321982	18887.2	41843.5	2.21545	0.00875121
ATP synthase subunit b (ATP synthase F(0) sector subunit b) (ATPase subunit I) (F-type ATPase subunit b) (F-ATPase subunit b)	tr|A0A318TDC7|A0A318TDC7_9BRAD	A0A318TDC7	Rhodopseudomonas faecalis	1.067	0.815579	26922.2	25305.1	0.939933	0.635862
magnesium chelatase (EC 6.6.1.1)	tr|A0A318TG11|A0A318TG11_9BRAD	A0A318TG11	Rhodopseudomonas faecalis	0.2952	0.00499505	10621.7	3096.88	0.291562	0.000333682
Phasin	tr|A0A318TJM4|A0A318TJM4_9BRAD	A0A318TJM4	Rhodopseudomonas faecalis	4.8366	0.000209146	44437.7	184948	4.16196	3.58713e-06
Cytokinin riboside 5'-monophosphate phosphoribohydrolase (EC 3.2.2.n1)	tr|A0A318TZM2|A0A318TZM2_9BRAD	A0A318TZM2	Rhodopseudomonas faecalis	1.5642	0.05534	4338.62	6168.07	1.42167	0.0412805
Transaldolase (EC 2.2.1.2)	tr|A0A318T9R5|A0A318T9R5_9BRAD	A0A318T9R5	Rhodopseudomonas faecalis	1.0795	0.72339	9115.21	8672.76	0.95146	0.492373
Hydroxymethylpyrimidine kinase /phosphomethylpyrimidine kinase	tr|A0A318T935|A0A318T935_9BRAD	A0A318T935	Rhodopseudomonas faecalis	1.4092	0.127156	4616.28	5929.55	1.28449	0.0190061
Malate dehydrogenase (EC 1.1.1.37)	tr|A0A318TJR8|A0A318TJR8_9BRAD	A0A318TJR8	Rhodopseudomonas faecalis	0.8734	0.609499	132040	102819	0.778696	0.0238458
Adenine phosphoribosyltransferase (APRT) (EC 2.4.2.7)	tr|A0A318TGY0|A0A318TGY0_9BRAD	A0A318TGY0	Rhodopseudomonas faecalis	0.9843	0.943297	48790	42506.4	0.87121	0.123862
Putative peroxidase-related enzyme	tr|A0A318TK61|A0A318TK61_9BRAD	A0A318TK61	Rhodopseudomonas faecalis	1.2004	0.418986	4245.08	3948.22	0.930068	0.561226
L-aspartate oxidase (EC 1.4.3.16)	tr|A0A318TGT7|A0A318TGT7_9BRAD	A0A318TGT7	Rhodopseudomonas faecalis	1.4214	0.146052	4453.25	4671.81	1.04908	0.548535
ATP synthase subunit beta (EC 7.1.2.2) (ATP synthase F1 sector subunit beta) (F-ATPase subunit beta)	tr|A0A318THG8|A0A318THG8_9BRAD	A0A318THG8	Rhodopseudomonas faecalis	1.1002	0.640689	227162	222802	0.980805	0.650631
UDP-3-O-acylglucosamine N-acyltransferase (EC 2.3.1.191)	tr|A0A318TR14|A0A318TR14_9BRAD	A0A318TR14	Rhodopseudomonas faecalis	0.9747	0.896628	4641.56	4003.16	0.86246	0.102397
Flavin prenyltransferase UbiX (EC 2.5.1.129)	tr|A0A318TGF8|A0A318TGF8_9BRAD	A0A318TGF8	Rhodopseudomonas faecalis	1.0272	0.89091	5443.48	5233.23	0.961376	0.531744
UDP-N-acetylmuramoyl-L-alanyl-D-glutamate--2,6-diaminopimelate ligase (EC 6.3.2.13) (Meso-A2pm-adding enzyme) (Meso-diaminopimelate-adding enzyme) (UDP-MurNAc-L-Ala-D-Glu:meso-diaminopimelate ligase) (UDP-MurNAc-tripeptide synthetase) (UDP-N-acetylmuramyl-tripeptide synthetase)	tr|A0A318TDN3|A0A318TDN3_9BRAD	A0A318TDN3	Rhodopseudomonas faecalis	0.9881	0.97124	13818.4	5897.16	0.426761	0.0418239
Molybdate transport system regulatory protein	tr|A0A318TH64|A0A318TH64_9BRAD	A0A318TH64	Rhodopseudomonas faecalis	1.3803	0.242187	2480.74	3050.5	1.22967	0.084566
PTS system mannose-specific IIA component	tr|A0A318TN76|A0A318TN76_9BRAD	A0A318TN76	Rhodopseudomonas faecalis	1.5532	0.199838	5140.15	6920.98	1.34645	0.319188
Single cache domain-containing protein	tr|A0A318TSN4|A0A318TSN4_9BRAD	A0A318TSN4	Rhodopseudomonas faecalis	0.875	0.689006	28557.9	23216.9	0.812978	0.254187
Uncharacterized protein DUF1849	tr|A0A318TJM3|A0A318TJM3_9BRAD	A0A318TJM3	Rhodopseudomonas faecalis	1.6659	0.0295168	4349.41	6490.45	1.49226	0.00797536
Pimeloyl-ACP methyl ester carboxylesterase	tr|A0A318TBY0|A0A318TBY0_9BRAD	A0A318TBY0	Rhodopseudomonas faecalis	1.2105	0.288494	4421.56	4764.17	1.07749	0.431095
NADH dehydrogenase subunit G	tr|A0A318TBI0|A0A318TBI0_9BRAD	A0A318TBI0	Rhodopseudomonas faecalis	1.1964	0.280605	3956.67	3824.6	0.966621	0.76474
ATP synthase epsilon chain (ATP synthase F1 sector epsilon subunit) (F-ATPase epsilon subunit)	tr|A0A318T9D8|A0A318T9D8_9BRAD	A0A318T9D8	Rhodopseudomonas faecalis	1.0617	0.763278	102855	100757	0.979603	0.651725
Ribonuclease PH (RNase PH) (EC 2.7.7.56) (tRNA nucleotidyltransferase)	tr|A0A318TJV5|A0A318TJV5_9BRAD	A0A318TJV5	Rhodopseudomonas faecalis	1.0019	0.988447	18495.8	18737.2	1.01306	0.917439
UDP-glucuronate 4-epimerase	tr|A0A318T8U9|A0A318T8U9_9BRAD	A0A318T8U9	Rhodopseudomonas faecalis	1.1671	0.431731	2439.37	2514.74	1.0309	0.643487
Isocitrate dehydrogenase [NADP] (EC 1.1.1.42)	tr|A0A318T7S5|A0A318T7S5_9BRAD	A0A318T7S5	Rhodopseudomonas faecalis	0.8989	0.666589	38494.8	30756.9	0.798989	0.0105066
Phosphate-specific transport system accessory protein PhoU	tr|A0A318TGC2|A0A318TGC2_9BRAD	A0A318TGC2	Rhodopseudomonas faecalis	2.4409	0.0376352	6956.82	13397.7	1.92584	0.0126921
Sulfide:quinone oxidoreductase	tr|A0A318TAB0|A0A318TAB0_9BRAD	A0A318TAB0	Rhodopseudomonas faecalis	2.8891	0.000461749	3650.88	8519.78	2.33362	4.43526e-05
ATP phosphoribosyltransferase regulatory subunit	tr|A0A318TKU2|A0A318TKU2_9BRAD	A0A318TKU2	Rhodopseudomonas faecalis	0.879	0.608845	11278	14184.7	1.25773	0.035243
Universal stress protein family protein	tr|A0A318TFS8|A0A318TFS8_9BRAD	A0A318TFS8	Rhodopseudomonas faecalis	2.5918	0.00760187	18627.4	40997.4	2.20092	0.000364599
Aspartate--tRNA(Asp/Asn) ligase (EC 6.1.1.23) (Aspartyl-tRNA synthetase) (AspRS) (Non-discriminating aspartyl-tRNA synthetase) (ND-AspRS)	tr|A0A318TEM7|A0A318TEM7_9BRAD	A0A318TEM7	Rhodopseudomonas faecalis	0.8521	0.453977	16058.7	13020.9	0.810832	0.0144839
Protein RecA (Recombinase A)	tr|A0A318T800|A0A318T800_9BRAD	A0A318T800	Rhodopseudomonas faecalis	0.9935	0.986497	17220.5	13751	0.798525	0.666091
RNA polymerase sigma-70 factor (ECF subfamily)	tr|A0A318T8B0|A0A318T8B0_9BRAD	A0A318T8B0	Rhodopseudomonas faecalis	1.5016	0.26828	4285.14	4286.36	1.00028	0.999361
Ribonuclease J	tr|A0A318TQZ6|A0A318TQZ6_9BRAD	A0A318TQZ6	Rhodopseudomonas faecalis	0.9291	0.623893	7489.48	6681.38	0.892102	0.46374
Prephenate dehydrogenase	tr|A0A318T8A3|A0A318T8A3_9BRAD	A0A318T8A3	Rhodopseudomonas faecalis	0.9685	0.870116	6797.42	5835.45	0.85848	0.00898948
Microcin C transport system substrate-binding protein	tr|A0A318T9D9|A0A318T9D9_9BRAD	A0A318T9D9	Rhodopseudomonas faecalis	1.5206	0.0484599	3980.11	5278.53	1.32623	0.012203
KDO2-lipid IV(A) lauroyltransferase	tr|A0A318TQ19|A0A318TQ19_9BRAD	A0A318TQ19	Rhodopseudomonas faecalis	0.9791	0.921647	5439.08	3040.22	0.558959	0.201326
50S ribosomal subunit assembly factor BipA (EC 3.6.5.-) (GTP-binding protein BipA)	tr|A0A318TUI1|A0A318TUI1_9BRAD	A0A318TUI1	Rhodopseudomonas faecalis	0.7356	0.347852	6771.8	4455.35	0.657926	0.0312774
Adenosylmethionine-8-amino-7-oxononanoate aminotransferase (EC 2.6.1.62) (7,8-diamino-pelargonic acid aminotransferase) (DAPA AT) (DAPA aminotransferase) (7,8-diaminononanoate synthase) (DANS) (Diaminopelargonic acid synthase)	tr|A0A318TLF6|A0A318TLF6_9BRAD	A0A318TLF6	Rhodopseudomonas faecalis	1.5757	0.0531022	3818.39	5334.99	1.39718	0.00759059
GCV_T domain-containing protein	tr|A0A318THC5|A0A318THC5_9BRAD	A0A318THC5	Rhodopseudomonas faecalis	1.1357	0.603227	4107.44	4232.66	1.03048	0.751288
Acetyl-CoA C-acetyltransferase/acetyl-CoA acyltransferase	tr|A0A318TTW6|A0A318TTW6_9BRAD	A0A318TTW6	Rhodopseudomonas faecalis	1.2791	0.305884	9584.89	10167.5	1.06078	0.670541
Prolyl-tRNA editing enzyme YbaK/EbsC (Cys-tRNA(Pro) deacylase)	tr|A0A318TDA8|A0A318TDA8_9BRAD	A0A318TDA8	Rhodopseudomonas faecalis	0.4576	0.0956144	5679.48	2862.18	0.503951	0.00174112
Malonyl-CoA/methylmalonyl-CoA synthetase	tr|A0A318TER1|A0A318TER1_9BRAD	A0A318TER1	Rhodopseudomonas faecalis	0.8513	0.421159	3402.03	2773.63	0.815286	0.0463702
Acetyltransferase	tr|A0A318TBX1|A0A318TBX1_9BRAD	A0A318TBX1	Rhodopseudomonas faecalis	3.0962	0.00162079	7025.99	17828.3	2.53748	3.95536e-06
Glycolate oxidase FAD binding subunit	tr|A0A318TM29|A0A318TM29_9BRAD	A0A318TM29	Rhodopseudomonas faecalis	2.0074	0.00916404	4362.17	6797.05	1.55818	0.000459487
Glycolate oxidase iron-sulfur subunit (EC 1.1.99.14)	tr|A0A318TDS9|A0A318TDS9_9BRAD	A0A318TDS9	Rhodopseudomonas faecalis	1.5828	0.0535848	3734.66	4969.7	1.3307	0.00162338
ETC complex I subunit-like protein	tr|A0A318TFS0|A0A318TFS0_9BRAD	A0A318TFS0	Rhodopseudomonas faecalis	0.9154	0.673408	5773.89	4688.72	0.812057	0.0130252
Dinitrogenase iron-molybdenum cofactor	tr|A0A318TXP2|A0A318TXP2_9BRAD	A0A318TXP2	Rhodopseudomonas faecalis	0.9769	0.899371	17016	14727.7	0.865521	0.341605
Glutamate--cysteine ligase (EC 6.3.2.2)	tr|A0A318TL57|A0A318TL57_9BRAD	A0A318TL57	Rhodopseudomonas faecalis	0.9173	0.667237	7279.68	7285	1.00073	0.990721
Ubiquinol-cytochrome c reductase iron-sulfur subunit (EC 7.1.1.8)	tr|A0A318TN21|A0A318TN21_9BRAD	A0A318TN21	Rhodopseudomonas faecalis	1.2116	0.468546	9939.33	12713.4	1.2791	0.00524389
Fructose-1,6-bisphosphatase	tr|A0A318TV31|A0A318TV31_9BRAD	A0A318TV31	Rhodopseudomonas faecalis	0.9669	0.884031	21894.3	18878	0.862233	0.0936784
Zinc-type alcohol dehydrogenase-like protein	tr|A0A318TBL6|A0A318TBL6_9BRAD	A0A318TBL6	Rhodopseudomonas faecalis	2.0117	0.0103209	3232.1	5938.12	1.83723	0.000678532
Putative dehydrogenase	tr|A0A318T944|A0A318T944_9BRAD	A0A318T944	Rhodopseudomonas faecalis	0.536	0.0412969	7023.85	3497.64	0.497966	0.0036334
Protease inhibitor Inh	tr|A0A318THC1|A0A318THC1_9BRAD	A0A318THC1	Rhodopseudomonas faecalis	1.2788	0.29122	6235.24	6327.71	1.01483	0.860559
Ribosome-binding ATPase YchF	tr|A0A318TID6|A0A318TID6_9BRAD	A0A318TID6	Rhodopseudomonas faecalis	0.8604	0.494048	7563.21	5786.79	0.765124	0.00400611
Acyl-[acyl-carrier-protein]--UDP-N-acetylglucosamine O-acyltransferase	tr|A0A318TNM6|A0A318TNM6_9BRAD	A0A318TNM6	Rhodopseudomonas faecalis	0.8224	0.567545	7423.82	5937.7	0.799817	0.202026
DUF1134 domain-containing protein	tr|A0A318T8H8|A0A318T8H8_9BRAD	A0A318T8H8	Rhodopseudomonas faecalis	1.2961	0.263879	10034.3	10351.5	1.03161	0.814644
Pyruvate carboxylase (EC 6.4.1.1)	tr|A0A318TBG4|A0A318TBG4_9BRAD	A0A318TBG4	Rhodopseudomonas faecalis	0.9254	0.76867	8446.65	6874.23	0.81384	0.129902
CubicO group peptidase (Beta-lactamase class C family)	tr|A0A318TCV3|A0A318TCV3_9BRAD	A0A318TCV3	Rhodopseudomonas faecalis	2.3727	0.0107424	3110.35	6629.39	2.1314	0.000906783
Fatty-acyl-CoA synthase	tr|A0A318TG74|A0A318TG74_9BRAD	A0A318TG74	Rhodopseudomonas faecalis	1.0453	0.827125	7313.97	7074.88	0.96731	0.655259
CubicO group peptidase (Beta-lactamase class C family)	tr|A0A318U067|A0A318U067_9BRAD	A0A318U067	Rhodopseudomonas faecalis	1.7361	0.0898824	2953.76	4429.3	1.49955	0.0418255
Heterodimeric methylmalonyl-CoA mutase small subunit	tr|A0A318TPH0|A0A318TPH0_9BRAD	A0A318TPH0	Rhodopseudomonas faecalis	0.5801	0.038136	13960.4	8509.76	0.609566	0.000523164
Phosphoribosylformylglycinamidine synthase subunit PurL (FGAM synthase) (EC 6.3.5.3) (Formylglycinamide ribonucleotide amidotransferase subunit II) (FGAR amidotransferase II) (FGAR-AT II) (Glutamine amidotransferase PurL) (Phosphoribosylformylglycinamidine synthase subunit II)	tr|A0A318TAP1|A0A318TAP1_9BRAD	A0A318TAP1	Rhodopseudomonas faecalis	0.9169	0.698901	14820	12467.3	0.841242	0.0719833
Nitrogen fixation protein NifZ	tr|A0A318TH70|A0A318TH70_9BRAD	A0A318TH70	Rhodopseudomonas faecalis	2.6522	0.0397171	2263	4931.68	2.17927	0.0394103
Flagellar biosynthesis protein FliO	tr|A0A318T973|A0A318T973_9BRAD	A0A318T973	Rhodopseudomonas faecalis	1.5423	0.12133	14471.7	11990.2	0.828528	0.463196
DNA gyrase subunit B (EC 5.6.2.2)	tr|A0A318T8K0|A0A318T8K0_9BRAD	A0A318T8K0	Rhodopseudomonas faecalis	0.7498	0.237589	6411.26	4470.88	0.697349	0.000133599
Phenylacetate-CoA ligase	tr|A0A318TJB3|A0A318TJB3_9BRAD	A0A318TJB3	Rhodopseudomonas faecalis	0.5068	0.149349	34785.8	16049.3	0.461376	0.0193272
Phosphate ABC transporter ATP-binding protein (PhoT family)	tr|A0A318T817|A0A318T817_9BRAD	A0A318T817	Rhodopseudomonas faecalis	1.5156	0.26935	6142.27	7132.91	1.16128	0.374968
Replication-associated recombination protein A	tr|A0A318TUF2|A0A318TUF2_9BRAD	A0A318TUF2	Rhodopseudomonas faecalis	1.0992	0.721766	2746.31	2990.57	1.08894	0.7864
Hopanoid biosynthesis associated radical SAM protein HpnH	tr|A0A318TZ09|A0A318TZ09_9BRAD	A0A318TZ09	Rhodopseudomonas faecalis	0.7693	0.227864	4287.82	2932.94	0.684016	0.0189107
phosphoserine transaminase (EC 2.6.1.52)	tr|A0A318TBE3|A0A318TBE3_9BRAD	A0A318TBE3	Rhodopseudomonas faecalis	0.8771	0.576091	74496.9	57737.1	0.775027	0.0186838
Response regulator receiver domain-containing protein	tr|A0A318TBT0|A0A318TBT0_9BRAD	A0A318TBT0	Rhodopseudomonas faecalis	2.3744	0.00160562	15139.7	32522.4	2.14815	0.00147143
Homoserine dehydrogenase (EC 1.1.1.3)	tr|A0A318TIB0|A0A318TIB0_9BRAD	A0A318TIB0	Rhodopseudomonas faecalis	0.9768	0.908436	11545.3	10138.5	0.87815	0.0399764
Hydroxymethylglutaryl-CoA lyase	tr|A0A318TG69|A0A318TG69_9BRAD	A0A318TG69	Rhodopseudomonas faecalis	1.4209	0.143704	3028.45	3279.33	1.08284	0.643396
Response regulator receiver protein	tr|A0A318THU2|A0A318THU2_9BRAD	A0A318THU2	Rhodopseudomonas faecalis	0.4822	0.0325818	19885.6	8168.21	0.410761	0.0120531
Phosphate-binding protein PstS	tr|A0A318T6Y8|A0A318T6Y8_9BRAD	A0A318T6Y8	Rhodopseudomonas faecalis	3.3437	0.0154034	45314.9	117945	2.60278	0.00416933
Pseudouridine synthase (EC 5.4.99.-)	tr|A0A318THT2|A0A318THT2_9BRAD	A0A318THT2	Rhodopseudomonas faecalis	0.522	0.315429	12930.7	9425.44	0.728918	0.188381
Acyl dehydratase	tr|A0A318TF21|A0A318TF21_9BRAD	A0A318TF21	Rhodopseudomonas faecalis	2.545	0.000670363	1077.99	2411.99	2.23749	0.000293851
Dihydrofolate reductase	tr|A0A318TNC8|A0A318TNC8_9BRAD	A0A318TNC8	Rhodopseudomonas faecalis	1.8787	0.0197869	2867.39	4680.54	1.63234	0.000316456
Flp pilus assembly protein TadG	tr|A0A318TN75|A0A318TN75_9BRAD	A0A318TN75	Rhodopseudomonas faecalis	0.8701	0.674582	4116.12	3681.41	0.894388	0.433213
LuxR family two component transcriptional regulator	tr|A0A318TMW8|A0A318TMW8_9BRAD	A0A318TMW8	Rhodopseudomonas faecalis	2.1613	0.00402262	11439.1	20546.6	1.79617	4.80641e-05
Indoleacetamide hydrolase	tr|A0A318TEV6|A0A318TEV6_9BRAD	A0A318TEV6	Rhodopseudomonas faecalis	1.5582	0.0777397	2373.11	#VALUE!	#VALUE!	#VALUE!
Porin	tr|A0A318TNY1|A0A318TNY1_9BRAD	A0A318TNY1	Rhodopseudomonas faecalis	0.6327	0.323843	6401.77	3427.79	0.535443	0.0304798
Fructose-1,6-bisphosphate aldolase (FBP aldolase) (EC 4.1.2.13)	tr|A0A318TIK4|A0A318TIK4_9BRAD	A0A318TIK4	Rhodopseudomonas faecalis	0.9013	0.674023	96546.4	76125.9	0.78849	0.0837313
Glutaredoxin	tr|A0A318T6L8|A0A318T6L8_9BRAD	A0A318T6L8	Rhodopseudomonas faecalis	2.2921	0.00259436	90049.2	179470	1.99302	0.000248785
3-oxoacyl-[acyl-carrier-protein] reductase (EC 1.1.1.100)	tr|A0A318TFQ3|A0A318TFQ3_9BRAD	A0A318TFQ3	Rhodopseudomonas faecalis	0.8703	0.53863	21885.8	16825.9	0.768801	0.0155972
MoxR-like ATPase	tr|A0A318THS2|A0A318THS2_9BRAD	A0A318THS2	Rhodopseudomonas faecalis	1.6707	0.0300434	6531.11	9608.14	1.47113	0.000636956
Peptide chain release factor 3 (RF-3)	tr|A0A318T953|A0A318T953_9BRAD	A0A318T953	Rhodopseudomonas faecalis	0.7079	0.186668	6052.53	5222.33	0.862834	0.26668
Putative lipid-binding transport protein (Tim44 family)	tr|A0A318TCK0|A0A318TCK0_9BRAD	A0A318TCK0	Rhodopseudomonas faecalis	1.5097	0.166576	13557	18030.8	1.33	0.0715291
NADH dehydrogenase	tr|A0A318TAF4|A0A318TAF4_9BRAD	A0A318TAF4	Rhodopseudomonas faecalis	1.7465	0.017101	7382.41	11444.5	1.55024	5.96705e-05
Acyl-CoA thioester hydrolase	tr|A0A318TDL5|A0A318TDL5_9BRAD	A0A318TDL5	Rhodopseudomonas faecalis	1.003	0.98911	7943.88	6764.62	0.851551	0.143484
Glutaryl-CoA dehydrogenase	tr|A0A318TLW9|A0A318TLW9_9BRAD	A0A318TLW9	Rhodopseudomonas faecalis	1.0481	0.808429	6456.24	5878.64	0.910536	0.206749
Acyl-CoA dehydrogenase	tr|A0A318TB17|A0A318TB17_9BRAD	A0A318TB17	Rhodopseudomonas faecalis	0.8251	0.402478	31619.9	23043.6	0.728769	0.0022391
Photosynthetic reaction center H subunit	tr|A0A318TD44|A0A318TD44_9BRAD	A0A318TD44	Rhodopseudomonas faecalis	0.9114	0.71906	123593	99495.3	0.805024	0.0883197
GTPase Era	tr|A0A318TGG0|A0A318TGG0_9BRAD	A0A318TGG0	Rhodopseudomonas faecalis	0.9661	0.870792	5274.8	4504.16	0.853901	0.0830105
Glutathione-dependent peroxiredoxin (EC 1.11.1.27)	tr|A0A318TJG3|A0A318TJG3_9BRAD	A0A318TJG3	Rhodopseudomonas faecalis	1.2676	0.273154	43748.3	49031.7	1.12077	0.0761071
Iron-regulated ABC transporter permease protein SufD	tr|A0A318TV48|A0A318TV48_9BRAD	A0A318TV48	Rhodopseudomonas faecalis	0.8	0.288947	7084.7	5198.33	0.733741	0.0208182
Geranyl-CoA carboxylase alpha subunit	tr|A0A318TN41|A0A318TN41_9BRAD	A0A318TN41	Rhodopseudomonas faecalis	1.1045	0.843481	1665.72	1602.32	0.961939	0.800757
Putative Zn-dependent peptidase	tr|A0A318TIP4|A0A318TIP4_9BRAD	A0A318TIP4	Rhodopseudomonas faecalis	0.6914	0.329498	6772.56	8929.61	1.3185	0.583719
Methionyl-tRNA formyltransferase (EC 2.1.2.9)	tr|A0A318TID3|A0A318TID3_9BRAD	A0A318TID3	Rhodopseudomonas faecalis	0.8903	0.552122	4226.31	3815.47	0.902789	0.306743
CHAD domain-containing protein	tr|A0A318TD52|A0A318TD52_9BRAD	A0A318TD52	Rhodopseudomonas faecalis	1.2844	0.324431	2598.24	2644.01	1.01762	0.794128
Phosphonate transport system substrate-binding protein	tr|A0A318TDP7|A0A318TDP7_9BRAD	A0A318TDP7	Rhodopseudomonas faecalis	2.6524	0.0240632	2675.11	5006.58	1.87155	0.102508
Beta-1-3, beta-1-6-glucan biosynthesis protein	tr|A0A318TIU6|A0A318TIU6_9BRAD	A0A318TIU6	Rhodopseudomonas faecalis	1.1324	0.618523	40916.5	40718.6	0.995163	0.958934
NADH-quinone oxidoreductase subunit C (EC 7.1.1.-) (NADH dehydrogenase I subunit C) (NDH-1 subunit C)	tr|A0A318TLT8|A0A318TLT8_9BRAD	A0A318TLT8	Rhodopseudomonas faecalis	1.2858	0.286869	10167.9	11143.7	1.09597	0.421313
chorismate mutase (EC 5.4.99.5)	tr|A0A318T701|A0A318T701_9BRAD	A0A318T701	Rhodopseudomonas faecalis	0.9685	0.881733	4159.71	3563.34	0.856632	0.14193
Ribonuclease D	tr|A0A318TBM7|A0A318TBM7_9BRAD	A0A318TBM7	Rhodopseudomonas faecalis	0.8548	0.374872	16044.1	12005.5	0.74828	0.00263742
Alkyl hydroperoxide reductase AhpD (EC 1.11.1.28) (Alkylhydroperoxidase AhpD)	tr|A0A318TM91|A0A318TM91_9BRAD	A0A318TM91	Rhodopseudomonas faecalis	0.3829	0.0250677	4447.22	1708.86	0.384254	0.0104712
N6-L-threonylcarbamoyladenine synthase/tRNA threonylcarbamoyladenosine biosynthesis protein TsaB	tr|A0A318TCB8|A0A318TCB8_9BRAD	A0A318TCB8	Rhodopseudomonas faecalis	0.9421	0.762435	4032.09	3340	0.828356	0.267905
Uncharacterized protein DUF3298	tr|A0A318TKD8|A0A318TKD8_9BRAD	A0A318TKD8	Rhodopseudomonas faecalis	0.3606	0.149731	4860.95	2641.7	0.543454	0.0445517
Porin	tr|A0A318TKR8|A0A318TKR8_9BRAD	A0A318TKR8	Rhodopseudomonas faecalis	0.508	0.0870748	9224.45	5614.04	0.608604	0.0108381
Tryptophan synthase alpha chain (EC 4.2.1.20)	tr|A0A318TKE6|A0A318TKE6_9BRAD	A0A318TKE6	Rhodopseudomonas faecalis	1.038	0.885422	21949.8	17926.8	0.816718	0.191954
Glutamine--fructose-6-phosphate aminotransferase [isomerizing] (EC 2.6.1.16) (D-fructose-6-phosphate amidotransferase) (GFAT) (Glucosamine-6-phosphate synthase) (Hexosephosphate aminotransferase) (L-glutamine--D-fructose-6-phosphate amidotransferase)	tr|A0A318TPD5|A0A318TPD5_9BRAD	A0A318TPD5	Rhodopseudomonas faecalis	0.8298	0.452748	5382.71	4363.05	0.810567	0.027381
Elongation factor 4 (EF-4) (EC 3.6.5.n1) (Ribosomal back-translocase LepA)	tr|A0A318TRE0|A0A318TRE0_9BRAD	A0A318TRE0	Rhodopseudomonas faecalis	0.9578	0.840443	8017.29	7535.06	0.939851	0.179653
histidine kinase (EC 2.7.13.3)	tr|A0A318T9S9|A0A318T9S9_9BRAD	A0A318T9S9	Rhodopseudomonas faecalis	1.3076	0.399679	4287.23	4954.26	1.15559	0.268512
Anthranilate phosphoribosyltransferase (EC 2.4.2.18)	tr|A0A318TLH8|A0A318TLH8_9BRAD	A0A318TLH8	Rhodopseudomonas faecalis	1.1425	0.589391	11233.3	11280.7	1.00423	0.961338
Carbamoyl-phosphate synthase small chain (EC 6.3.5.5) (Carbamoyl-phosphate synthetase glutamine chain)	tr|A0A318THQ7|A0A318THQ7_9BRAD	A0A318THQ7	Rhodopseudomonas faecalis	1.0208	0.91132	14654.4	13677.8	0.933358	0.262316
Phosphate starvation-inducible protein PhoH	tr|A0A318TI22|A0A318TI22_9BRAD	A0A318TI22	Rhodopseudomonas faecalis	0.9314	0.745673	3399.87	3008.45	0.884872	0.456273
Beta-ketodecanoyl-[acyl-carrier-protein] synthase	tr|A0A318TL38|A0A318TL38_9BRAD	A0A318TL38	Rhodopseudomonas faecalis	0.8567	0.55637	15321.2	11600.2	0.757138	0.0347409
30S ribosomal protein S3	tr|A0A318TPS2|A0A318TPS2_9BRAD	A0A318TPS2	Rhodopseudomonas faecalis	0.8779	0.590688	33808.5	26283.9	0.777434	0.0191729
Ribosomal-protein-alanine N-acetyltransferase	tr|A0A318T8T4|A0A318T8T4_9BRAD	A0A318T8T4	Rhodopseudomonas faecalis	1.2228	0.526293	2586.15	2784.28	1.07661	0.653019
Carbohydrate ABC transporter substrate-binding protein (CUT1 family)	tr|A0A318TEW9|A0A318TEW9_9BRAD	A0A318TEW9	Rhodopseudomonas faecalis	1.2602	0.244783	7160.42	9234.68	1.28968	0.0487791
Threonine synthase (EC 4.2.3.1)	tr|A0A318TGH1|A0A318TGH1_9BRAD	A0A318TGH1	Rhodopseudomonas faecalis	1.0428	0.82414	7040.42	6518.44	0.925861	0.115216
Ribulose-phosphate 3-epimerase (EC 5.1.3.1)	tr|A0A318TSG7|A0A318TSG7_9BRAD	A0A318TSG7	Rhodopseudomonas faecalis	1.1895	0.62803	13573.1	14572.1	1.0736	0.769781
Carbon-monoxide dehydrogenase small subunit	tr|A0A318T729|A0A318T729_9BRAD	A0A318T729	Rhodopseudomonas faecalis	1.3591	0.334199	7124.9	9427.71	1.32321	0.215292
Hydroxyneurosporene synthase	tr|A0A318TCN6|A0A318TCN6_9BRAD	A0A318TCN6	Rhodopseudomonas faecalis	1.2778	0.161135	9563.48	10850.6	1.13459	0.120086
Glutamate--tRNA ligase (EC 6.1.1.17) (Glutamyl-tRNA synthetase) (GluRS)	tr|A0A318TLG0|A0A318TLG0_9BRAD	A0A318TLG0	Rhodopseudomonas faecalis	0.9166	0.660815	9119.24	7623.97	0.836031	0.000755879
Pyruvate, phosphate dikinase (EC 2.7.9.1) (Pyruvate, orthophosphate dikinase)	tr|A0A318TQ69|A0A318TQ69_9BRAD	A0A318TQ69	Rhodopseudomonas faecalis	0.9431	0.779687	37540.4	31420.4	0.836976	0.00131103
Chitooligosaccharide deacetylase (Nodulation protein B)	tr|A0A318TQS7|A0A318TQS7_9BRAD	A0A318TQS7	Rhodopseudomonas faecalis	0.2264	0.0817471	7059.09	3048.29	0.431826	0.000877534
Polyphosphate kinase (EC 2.7.4.1) (ATP-polyphosphate phosphotransferase) (Polyphosphoric acid kinase)	tr|A0A318TJU7|A0A318TJU7_9BRAD	A0A318TJU7	Rhodopseudomonas faecalis	1.9323	0.0124305	9886.38	16796	1.6989	0.000495483
Phosphoribosyl pyrophosphate synthase	tr|A0A318TBS9|A0A318TBS9_9BRAD	A0A318TBS9	Rhodopseudomonas faecalis	1.4637	0.110578	6125.99	7905.49	1.29048	0.0412984
Glycogen operon protein	tr|A0A318TDR2|A0A318TDR2_9BRAD	A0A318TDR2	Rhodopseudomonas faecalis	1.758	0.0315344	2937.84	3948.62	1.34405	0.0742398
Peroxiredoxin (EC 1.11.1.24) (Thioredoxin-dependent peroxiredoxin)	tr|A0A318TRN9|A0A318TRN9_9BRAD	A0A318TRN9	Rhodopseudomonas faecalis	0.7933	0.431115	#VALUE!	5300.4	#VALUE!	#VALUE!
Oligopeptidase B	tr|A0A318TG57|A0A318TG57_9BRAD	A0A318TG57	Rhodopseudomonas faecalis	1.7604	0.0184666	8990.06	12399.9	1.37929	0.00294509
Pimeloyl-CoA dehydrogenase small subunit	tr|A0A318TGU1|A0A318TGU1_9BRAD	A0A318TGU1	Rhodopseudomonas faecalis	1.3101	0.215803	12034.9	13877.4	1.15309	0.0471168
Bacterioferritin (EC 1.16.3.1)	tr|A0A318TKE8|A0A318TKE8_9BRAD	A0A318TKE8	Rhodopseudomonas faecalis	2.8734	0.0124667	25713.6	61122.2	2.37704	0.00225729
Sulfite reductase (NADPH) hemoprotein beta-component	tr|A0A318TFJ8|A0A318TFJ8_9BRAD	A0A318TFJ8	Rhodopseudomonas faecalis	1.1797	0.578486	16798.1	17854.8	1.06291	0.644877
50S ribosomal protein L3	tr|A0A318TII5|A0A318TII5_9BRAD	A0A318TII5	Rhodopseudomonas faecalis	0.8205	0.406381	110207	79941	0.725369	0.0048309
Protein phosphatase CheZ (Chemotaxis protein CheZ)	tr|A0A318TJ59|A0A318TJ59_9BRAD	A0A318TJ59	Rhodopseudomonas faecalis	1.0428	0.881148	5638.76	5445.5	0.965727	0.798005
Transcription elongation factor GreA (Transcript cleavage factor GreA)	tr|A0A318TD33|A0A318TD33_9BRAD	A0A318TD33	Rhodopseudomonas faecalis	1.2859	0.470107	28220.1	32166.6	1.13985	0.524864
Bifunctional protein HldE [Includes: D-beta-D-heptose 7-phosphate kinase (EC 2.7.1.167) (D-beta-D-heptose 7-phosphotransferase) (D-glycero-beta-D-manno-heptose-7-phosphate kinase); D-beta-D-heptose 1-phosphate adenylyltransferase (EC 2.7.7.70) (D-glycero-beta-D-manno-heptose 1-phosphate adenylyltransferase)]	tr|A0A318TAE0|A0A318TAE0_9BRAD	A0A318TAE0	Rhodopseudomonas faecalis	1.0729	0.766053	5678.45	6008.13	1.05806	0.537025
Periplasmic chaperone for outer membrane proteins SurA	tr|A0A318TFR4|A0A318TFR4_9BRAD	A0A318TFR4	Rhodopseudomonas faecalis	0.7454	0.354178	9200.75	6635.56	0.721198	0.0246051
Enoyl-CoA hydratase	tr|A0A318T8N0|A0A318T8N0_9BRAD	A0A318T8N0	Rhodopseudomonas faecalis	1.2389	0.364909	6946.92	7518.21	1.08224	0.293298
Ribosome-binding factor A	tr|A0A318TI32|A0A318TI32_9BRAD	A0A318TI32	Rhodopseudomonas faecalis	0.9279	0.754362	3543.97	2871.91	0.810365	0.136809
Propionyl-CoA synthetase	tr|A0A318TM49|A0A318TM49_9BRAD	A0A318TM49	Rhodopseudomonas faecalis	0.7832	0.388386	25869.2	18283.1	0.70675	0.0277788
Exodeoxyribonuclease-3	tr|A0A318TL26|A0A318TL26_9BRAD	A0A318TL26	Rhodopseudomonas faecalis	0.819	0.535975	4219.11	3599.64	0.853174	0.173525
Isocitrate lyase (EC 4.1.3.1) (Isocitrase) (Isocitratase)	tr|A0A318TB01|A0A318TB01_9BRAD	A0A318TB01	Rhodopseudomonas faecalis	0.419	0.017144	109461	41696	0.380921	0.000257128
2-desacetyl-2-hydroxyethyl bacteriochlorophyllide A dehydrogenase	tr|A0A318TDR1|A0A318TDR1_9BRAD	A0A318TDR1	Rhodopseudomonas faecalis	1.1596	0.456757	12551.9	12905.4	1.02816	0.699835
Phosphomannomutase/phosphoglucomutase	tr|A0A318T7Y1|A0A318T7Y1_9BRAD	A0A318T7Y1	Rhodopseudomonas faecalis	1.1345	0.847037	2516.1	1800.91	0.715756	0.107325
Prophage protein	tr|A0A318TCR8|A0A318TCR8_9BRAD	A0A318TCR8	Rhodopseudomonas faecalis	1.6414	0.0741919	7615.36	10996	1.44392	0.0348089
Ferric uptake regulation protein	tr|A0A318T8K7|A0A318T8K7_9BRAD	A0A318T8K7	Rhodopseudomonas faecalis	0.8448	0.519535	49625.9	37821.4	0.76213	0.0202143
D-lactate dehydrogenase (Cytochrome)	tr|A0A318T9P5|A0A318T9P5_9BRAD	A0A318T9P5	Rhodopseudomonas faecalis	0.675	0.162479	6196.86	3966.78	0.640128	0.0101311
Amino acid/amide ABC transporter substrate-binding protein (HAAT family)	tr|A0A318TIY1|A0A318TIY1_9BRAD	A0A318TIY1	Rhodopseudomonas faecalis	0.4458	0.0170589	1527.36	1022.72	0.669595	0.00150078
3-phosphoshikimate 1-carboxyvinyltransferase (EC 2.5.1.19) (5-enolpyruvylshikimate-3-phosphate synthase) (EPSP synthase) (EPSPS)	tr|A0A318TCD3|A0A318TCD3_9BRAD	A0A318TCD3	Rhodopseudomonas faecalis	1.0234	0.916745	8859.05	7966.28	0.899226	0.464296
Flagellin-like hook-associated protein FlgL	tr|A0A318TEC1|A0A318TEC1_9BRAD	A0A318TEC1	Rhodopseudomonas faecalis	0.9836	0.951329	79410	69590.9	0.876349	0.333936
ModE family transcriptional regulator	tr|A0A318TI46|A0A318TI46_9BRAD	A0A318TI46	Rhodopseudomonas faecalis	3.5532	0.0262613	1901.66	3727.73	1.96024	0.0208354
NAD(P)H-dependent FMN reductase	tr|A0A318TG96|A0A318TG96_9BRAD	A0A318TG96	Rhodopseudomonas faecalis	1.3171	0.361727	2961.29	4197.17	1.41735	0.192374
BolA protein family transcriptional regulator	tr|A0A318TG89|A0A318TG89_9BRAD	A0A318TG89	Rhodopseudomonas faecalis	4.1794	0.000758069	45961.9	174020	3.78618	0.00125409
Molecular chaperone Hsp33	tr|A0A318T8M8|A0A318T8M8_9BRAD	A0A318T8M8	Rhodopseudomonas faecalis	1.2226	0.482702	5366.01	5479.69	1.02118	0.925001
Short-chain dehydrogenase	tr|A0A318T9D2|A0A318T9D2_9BRAD	A0A318T9D2	Rhodopseudomonas faecalis	4.4404	0.0110608	10859	37395.4	3.44372	0.00543984
Uncharacterized protein (DUF934 family)	tr|A0A318TDC1|A0A318TDC1_9BRAD	A0A318TDC1	Rhodopseudomonas faecalis	1.0278	0.901241	17857.7	16660	0.932929	0.613864
ATP synthase subunit b (ATP synthase F(0) sector subunit b) (ATPase subunit I) (F-type ATPase subunit b) (F-ATPase subunit b)	tr|A0A318TEK0|A0A318TEK0_9BRAD	A0A318TEK0	Rhodopseudomonas faecalis	1.1303	0.759756	17540	18997.8	1.08311	0.643554
histidine kinase (EC 2.7.13.3)	tr|A0A318T7V2|A0A318T7V2_9BRAD	A0A318T7V2	Rhodopseudomonas faecalis	0.5234	0.0619114	4690.31	2333.11	0.497432	0.00574168
Enoyl-[acyl-carrier-protein] reductase [NADH] (EC 1.3.1.9)	tr|A0A318TJ94|A0A318TJ94_9BRAD	A0A318TJ94	Rhodopseudomonas faecalis	2.4501	0.00565337	8175.35	16345.5	1.99937	0.0589702
Long-chain acyl-CoA synthetase	tr|A0A318TTV0|A0A318TTV0_9BRAD	A0A318TTV0	Rhodopseudomonas faecalis	0.7708	0.471067	1973.86	1717.28	0.870007	0.194657
Methyl-accepting chemotaxis sensory transducer	tr|A0A318T7W6|A0A318T7W6_9BRAD	A0A318T7W6	Rhodopseudomonas faecalis	0.5563	0.249223	3502.68	2571.46	0.734141	0.210917
Precorrin-6A reductase	tr|A0A318TE30|A0A318TE30_9BRAD	A0A318TE30	Rhodopseudomonas faecalis	0.8349	0.48176	8817.15	7091.61	0.804297	0.00648004
ATP-dependent dethiobiotin synthetase BioD (EC 6.3.3.3) (DTB synthetase) (DTBS) (Dethiobiotin synthase)	tr|A0A318TKD9|A0A318TKD9_9BRAD	A0A318TKD9	Rhodopseudomonas faecalis	1.5318	0.0332977	6776.84	9319.04	1.37513	0.040832
MSHA biogenesis protein MshP	tr|A0A318TVD6|A0A318TVD6_9BRAD	A0A318TVD6	Rhodopseudomonas faecalis	1.3879	0.552096	6520.04	11014.8	1.68938	0.524713
DNA ligase (EC 6.5.1.2) (Polydeoxyribonucleotide synthase [NAD(+)])	tr|A0A318TDL3|A0A318TDL3_9BRAD	A0A318TDL3	Rhodopseudomonas faecalis	0.977	0.918802	3153.75	2463.46	0.781123	0.0273813
4-hydroxy-3-methylbut-2-en-1-yl diphosphate synthase (flavodoxin) (EC 1.17.7.3) (1-hydroxy-2-methyl-2-(E)-butenyl 4-diphosphate synthase)	tr|A0A318T8V5|A0A318T8V5_9BRAD	A0A318T8V5	Rhodopseudomonas faecalis	0.8462	0.449795	23541.1	17715.8	0.752547	0.00645661
Glucose-1-phosphate adenylyltransferase (EC 2.7.7.27) (ADP-glucose pyrophosphorylase) (ADPGlc PPase) (ADP-glucose synthase)	tr|A0A318TIJ1|A0A318TIJ1_9BRAD	A0A318TIJ1	Rhodopseudomonas faecalis	1.4997	0.072735	11068.4	14673.6	1.32572	0.0137736
Ribosomal silencing factor RsfS	tr|A0A318THH8|A0A318THH8_9BRAD	A0A318THH8	Rhodopseudomonas faecalis	0.6793	0.111079	6144.81	4132.95	0.672592	0.000891567
NADH-quinone oxidoreductase subunit B (EC 7.1.1.-) (NADH dehydrogenase I subunit B) (NDH-1 subunit B)	tr|A0A318TKT7|A0A318TKT7_9BRAD	A0A318TKT7	Rhodopseudomonas faecalis	0.9367	0.599564	8389.75	7364.14	0.877754	0.268019
S1 motif domain-containing protein	tr|A0A318TCQ0|A0A318TCQ0_9BRAD	A0A318TCQ0	Rhodopseudomonas faecalis	0.7186	0.235691	5411.98	3688.25	0.681498	0.00148239
Metallophosphoesterase	tr|A0A318TGQ3|A0A318TGQ3_9BRAD	A0A318TGQ3	Rhodopseudomonas faecalis	1.1951	0.394798	6681.63	7674.61	1.14861	0.370888
Squalene-hopene/tetraprenyl-beta-curcumene cyclase	tr|A0A318THD6|A0A318THD6_9BRAD	A0A318THD6	Rhodopseudomonas faecalis	1.5754	0.0584828	8157.58	11306.6	1.38603	0.000674182
Thioredoxin reductase (EC 1.8.1.9)	tr|A0A318THH0|A0A318THH0_9BRAD	A0A318THH0	Rhodopseudomonas faecalis	1.1664	0.613819	14150.8	13244	0.935916	0.596876
Chlorophyllide reductase subunit Z (EC 1.3.7.15) (Chlorin reductase subunit Z)	tr|A0A318TSZ4|A0A318TSZ4_9BRAD	A0A318TSZ4	Rhodopseudomonas faecalis	0.818	0.374797	14205.3	10232.9	0.720359	0.11378
Riboflavin biosynthesis protein [Includes: Riboflavin kinase (EC 2.7.1.26) (Flavokinase); FMN adenylyltransferase (EC 2.7.7.2) (FAD pyrophosphorylase) (FAD synthase)]	tr|A0A318TGI2|A0A318TGI2_9BRAD	A0A318TGI2	Rhodopseudomonas faecalis	0.7656	0.176887	7199.25	7232.98	1.00468	0.96829
Iron-regulated ABC transporter membrane component SufB	tr|A0A318TF83|A0A318TF83_9BRAD	A0A318TF83	Rhodopseudomonas faecalis	0.8562	0.407325	2807.44	2155.65	0.767833	0.172193
Carbonic anhydrase/acetyltransferase-like protein (Isoleucine patch superfamily)	tr|A0A318TTZ2|A0A318TTZ2_9BRAD	A0A318TTZ2	Rhodopseudomonas faecalis	1.1307	0.457719	20190.2	20710.4	1.02577	0.732768
Pyruvate kinase (EC 2.7.1.40)	tr|A0A318TSI0|A0A318TSI0_9BRAD	A0A318TSI0	Rhodopseudomonas faecalis	1.1273	0.55558	6944.87	7056.77	1.01611	0.750765
50S ribosomal protein L7/L12	tr|A0A318TCV2|A0A318TCV2_9BRAD	A0A318TCV2	Rhodopseudomonas faecalis	0.8375	0.527069	310727	225367	0.725287	0.0788041
Glutathione S-transferase	tr|A0A318TJF9|A0A318TJF9_9BRAD	A0A318TJF9	Rhodopseudomonas faecalis	1.1078	0.536269	18900.5	18620.3	0.985173	0.864707
Microcin-processing peptidase 1	tr|A0A318THW2|A0A318THW2_9BRAD	A0A318THW2	Rhodopseudomonas faecalis	1.4382	0.121526	5172	6710.6	1.29748	0.0307006
Lon N-terminal domain-containing protein	tr|A0A318TBK5|A0A318TBK5_9BRAD	A0A318TBK5	Rhodopseudomonas faecalis	1.7427	0.00400699	9984.07	14645.9	1.46692	0.00562041
Transglutaminase-like putative cysteine protease	tr|A0A318TN60|A0A318TN60_9BRAD	A0A318TN60	Rhodopseudomonas faecalis	1.8153	0.0884816	2044.84	2820.65	1.3794	0.00605721
Adenylate kinase (AK) (EC 2.7.4.3) (ATP-AMP transphosphorylase) (ATP:AMP phosphotransferase) (Adenylate monophosphate kinase)	tr|A0A318TA69|A0A318TA69_9BRAD	A0A318TA69	Rhodopseudomonas faecalis	1.0616	0.790602	34424.3	32379.8	0.940608	0.337368
23S rRNA (Guanosine2251-2'-O)-methyltransferase	tr|A0A318TER9|A0A318TER9_9BRAD	A0A318TER9	Rhodopseudomonas faecalis	1.343	0.0653893	3860.89	4708.58	1.21956	0.0340472
D-3-phosphoglycerate dehydrogenase (EC 1.1.1.95)	tr|A0A318TJE5|A0A318TJE5_9BRAD	A0A318TJE5	Rhodopseudomonas faecalis	0.763	0.345879	85816.5	57388.3	0.668733	0.0202963
Phosphate regulon transcriptional regulatory protein PhoB	tr|A0A318T852|A0A318T852_9BRAD	A0A318T852	Rhodopseudomonas faecalis	0.9332	0.824319	6967.59	5645.96	0.810316	0.198999
Phosphotransferase IIA-like nitrogen-regulatory protein PtsN	tr|A0A318TKG6|A0A318TKG6_9BRAD	A0A318TKG6	Rhodopseudomonas faecalis	1.5773	0.1171	11931.6	16760.8	1.40473	0.0785729
UTP--glucose-1-phosphate uridylyltransferase (EC 2.7.7.9) (UDP-glucose pyrophosphorylase)	tr|A0A318TRQ0|A0A318TRQ0_9BRAD	A0A318TRQ0	Rhodopseudomonas faecalis	1.2131	0.395774	19566.4	22682	1.15923	0.0362421
N-acetyl-gamma-glutamyl-phosphate reductase (AGPR) (EC 1.2.1.38) (N-acetyl-glutamate semialdehyde dehydrogenase) (NAGSA dehydrogenase)	tr|A0A318TI01|A0A318TI01_9BRAD	A0A318TI01	Rhodopseudomonas faecalis	1.3499	0.173643	10844.6	12787.8	1.17918	0.318177
Uncharacterized protein YhaN	tr|A0A318TDK1|A0A318TDK1_9BRAD	A0A318TDK1	Rhodopseudomonas faecalis	1.1184	0.539157	3297.84	3304.04	1.00188	0.984308
AsnC family transcriptional regulator	tr|A0A318TFB7|A0A318TFB7_9BRAD	A0A318TFB7	Rhodopseudomonas faecalis	0.973	0.918595	4959.91	4413.72	0.889879	0.251809
Lectin-like protein BA14k	tr|A0A318TGF3|A0A318TGF3_9BRAD	A0A318TGF3	Rhodopseudomonas faecalis	8.1263	0.0101429	77420.1	407817	5.26759	0.00564389
Iron(III) transport system substrate-binding protein	tr|A0A318TFK1|A0A318TFK1_9BRAD	A0A318TFK1	Rhodopseudomonas faecalis	4.2276	0.00907816	8932.28	26632.9	2.98165	0.00334818
Chromosome partition protein Smc	tr|A0A318TQ94|A0A318TQ94_9BRAD	A0A318TQ94	Rhodopseudomonas faecalis	0.6692	0.0964497	2540.54	1904.62	0.749692	0.0115221
4-hydroxy-tetrahydrodipicolinate synthase (HTPA synthase) (EC 4.3.3.7)	tr|A0A318TGF1|A0A318TGF1_9BRAD	A0A318TGF1	Rhodopseudomonas faecalis	1.3511	0.186281	25826.3	30893.7	1.19621	0.0568362
Argininosuccinate lyase (ASAL) (EC 4.3.2.1) (Arginosuccinase)	tr|A0A318T7P5|A0A318T7P5_9BRAD	A0A318T7P5	Rhodopseudomonas faecalis	0.9346	0.685357	10368.3	9816.01	0.946737	0.446005
Creatinine amidohydrolase	tr|A0A318TBP2|A0A318TBP2_9BRAD	A0A318TBP2	Rhodopseudomonas faecalis	1.1342	0.572107	6549.34	6716.88	1.02558	0.82223
HlyD family secretion protein	tr|A0A318TIK2|A0A318TIK2_9BRAD	A0A318TIK2	Rhodopseudomonas faecalis	1.0484	0.852864	4091.73	3818.09	0.933123	0.539681
SIR2-like protein	tr|A0A318TMA8|A0A318TMA8_9BRAD	A0A318TMA8	Rhodopseudomonas faecalis	7.5616	0.000530211	5465.39	18821.9	3.44384	0.000159428
Alpha-1,4-glucan:maltose-1-phosphate maltosyltransferase (GMPMT) (EC 2.4.99.16) ((1->4)-alpha-D-glucan:maltose-1-phosphate alpha-D-maltosyltransferase)	tr|A0A318TD25|A0A318TD25_9BRAD	A0A318TD25	Rhodopseudomonas faecalis	3.4336	0.00831753	1602.92	3023.69	1.88637	0.0300927
Outer membrane immunogenic protein	tr|A0A318TM98|A0A318TM98_9BRAD	A0A318TM98	Rhodopseudomonas faecalis	1.0103	0.964952	4399.79	3912.47	0.88924	0.196162
Thiosulfate/3-mercaptopyruvate sulfurtransferase	tr|A0A318TJX3|A0A318TJX3_9BRAD	A0A318TJX3	Rhodopseudomonas faecalis	1.3444	0.547296	4698.11	5128.78	1.09167	0.474874
50S ribosomal protein L25 (General stress protein CTC)	tr|A0A318TCP8|A0A318TCP8_9BRAD	A0A318TCP8	Rhodopseudomonas faecalis	0.8064	0.485785	83317.8	58628	0.703667	0.0472317
Methyltransferase family protein	tr|A0A318TU24|A0A318TU24_9BRAD	A0A318TU24	Rhodopseudomonas faecalis	0.692	0.286978	2231.05	1603.59	0.718758	0.146444
CheW protein	tr|A0A318TG19|A0A318TG19_9BRAD	A0A318TG19	Rhodopseudomonas faecalis	0.6614	0.183322	4028.61	3304.49	0.820255	0.227757
2-oxoglutarate ferredoxin oxidoreductase subunit gamma	tr|A0A318TMY2|A0A318TMY2_9BRAD	A0A318TMY2	Rhodopseudomonas faecalis	0.6716	0.084137	9650.14	6008.25	0.622607	0.00158892
LexA repressor (EC 3.4.21.88)	tr|A0A318TNL4|A0A318TNL4_9BRAD	A0A318TNL4	Rhodopseudomonas faecalis	0.728	0.507274	6054.88	14595.4	2.41052	0.445361
D-methionine transport system substrate-binding protein	tr|A0A318TXV7|A0A318TXV7_9BRAD	A0A318TXV7	Rhodopseudomonas faecalis	0.8736	0.820664	167006	180434	1.0804	0.838584
Glutathione S-transferase	tr|A0A318T755|A0A318T755_9BRAD	A0A318T755	Rhodopseudomonas faecalis	1.9009	0.0102904	6055.25	10101.1	1.66816	0.000947157
NAD(P) transhydrogenase alpha subunit	tr|A0A318TDD0|A0A318TDD0_9BRAD	A0A318TDD0	Rhodopseudomonas faecalis	0.9947	0.981071	178706	157028	0.878693	0.0847053
Chaperonin GroEL (EC 5.6.1.7) (60 kDa chaperonin) (Chaperonin-60) (Cpn60)	tr|A0A318TIB1|A0A318TIB1_9BRAD	A0A318TIB1	Rhodopseudomonas faecalis	0.9022	0.691288	185450	148040	0.798271	0.164477
Thiazole synthase (EC 2.8.1.10)	tr|A0A318TG79|A0A318TG79_9BRAD	A0A318TG79	Rhodopseudomonas faecalis	0.3957	0.0125253	10857.4	6323.22	0.582387	0.00889591
Acyl-CoA dehydrogenase	tr|A0A318TQH8|A0A318TQH8_9BRAD	A0A318TQH8	Rhodopseudomonas faecalis	1.276	0.215795	6977.69	8002.79	1.14691	0.198288
ATP-dependent Clp protease adapter protein ClpS	tr|A0A318TFA2|A0A318TFA2_9BRAD	A0A318TFA2	Rhodopseudomonas faecalis	1.0306	0.957955	3318.58	2660.36	0.801656	0.543419
Tryptophan--tRNA ligase (EC 6.1.1.2) (Tryptophanyl-tRNA synthetase) (TrpRS)	tr|A0A318T9X4|A0A318T9X4_9BRAD	A0A318T9X4	Rhodopseudomonas faecalis	1.0741	0.737775	21785.4	20752.4	0.952585	0.48932
Triosephosphate isomerase (TIM) (TPI) (EC 5.3.1.1) (Triose-phosphate isomerase)	tr|A0A318TL96|A0A318TL96_9BRAD	A0A318TL96	Rhodopseudomonas faecalis	1.4752	0.0863207	14937.4	23635.9	1.58233	0.00177798
2-isopropylmalate synthase (EC 2.3.3.13) (Alpha-IPM synthase) (Alpha-isopropylmalate synthase)	tr|A0A318TK56|A0A318TK56_9BRAD	A0A318TK56	Rhodopseudomonas faecalis	0.8711	0.506827	12927.9	10710.1	0.82845	0.114541
Lectin-like protein BA14k	tr|A0A318TKZ9|A0A318TKZ9_9BRAD	A0A318TKZ9	Rhodopseudomonas faecalis	0.2831	0.0202158	13564.9	3515.59	0.259168	0.024679
Membrane protein insertase YidC (Foldase YidC) (Membrane integrase YidC) (Membrane protein YidC)	tr|A0A318T8C1|A0A318T8C1_9BRAD	A0A318T8C1	Rhodopseudomonas faecalis	1.0128	0.966843	5940.5	5838.93	0.982902	0.896785
TSPc domain-containing protein	tr|A0A318TI44|A0A318TI44_9BRAD	A0A318TI44	Rhodopseudomonas faecalis	1.3809	0.304084	31633	37653.4	1.19032	0.185203
Single cache domain-containing protein	tr|A0A318TFD5|A0A318TFD5_9BRAD	A0A318TFD5	Rhodopseudomonas faecalis	0.6118	0.269316	34831.7	17865.2	0.512901	0.0767942
maltose alpha-D-glucosyltransferase (EC 5.4.99.16) (Maltose alpha-D-glucosyltransferase)	tr|A0A318TEW4|A0A318TEW4_9BRAD	A0A318TEW4	Rhodopseudomonas faecalis	3.0554	0.00177354	3894.58	8541.6	2.1932	0.00052318
mannose-1-phosphate guanylyltransferase (EC 2.7.7.13)	tr|A0A318TBX9|A0A318TBX9_9BRAD	A0A318TBX9	Rhodopseudomonas faecalis	1.0615	0.815525	4079.37	3866.78	0.947888	0.629669
GMP synthase [glutamine-hydrolyzing] (EC 6.3.5.2) (GMP synthetase) (Glutamine amidotransferase)	tr|A0A318TRQ1|A0A318TRQ1_9BRAD	A0A318TRQ1	Rhodopseudomonas faecalis	0.8473	0.479231	9685.14	7361.03	0.760033	0.0247724
Homoserine kinase (HK) (HSK) (EC 2.7.1.39)	tr|A0A318TBU0|A0A318TBU0_9BRAD	A0A318TBU0	Rhodopseudomonas faecalis	0.8815	0.494835	5655.52	4419.81	0.781504	0.00834556
Winged helix family two component transcriptional regulator	tr|A0A318TJ98|A0A318TJ98_9BRAD	A0A318TJ98	Rhodopseudomonas faecalis	1.2069	0.260052	6584.04	5462.01	0.829583	0.401548
Aldehyde dehydrogenase	tr|A0A318TU89|A0A318TU89_9BRAD	A0A318TU89	Rhodopseudomonas faecalis	1.584	0.175462	7279.15	6752.64	0.927669	0.37796
Aminotransferase (EC 2.6.1.-)	tr|A0A318TF62|A0A318TF62_9BRAD	A0A318TF62	Rhodopseudomonas faecalis	0.9723	0.904859	49324	42630.9	0.864304	0.132851
Enoyl-CoA hydratase/carnithine racemase	tr|A0A318TQJ3|A0A318TQJ3_9BRAD	A0A318TQJ3	Rhodopseudomonas faecalis	1.3101	0.159035	4544.25	5293.46	1.16487	0.0646458
MurNAc alpha-1-phosphate uridylyltransferase	tr|A0A318TRU6|A0A318TRU6_9BRAD	A0A318TRU6	Rhodopseudomonas faecalis	1.9603	0.00851993	9940.72	17372.6	1.74762	0.00207299
Fatty-acyl-CoA synthase	tr|A0A318TPC0|A0A318TPC0_9BRAD	A0A318TPC0	Rhodopseudomonas faecalis	0.8531	0.546455	4677.45	3900.43	0.83388	0.188309
Winged helix family two component transcriptional regulator	tr|A0A318TEI8|A0A318TEI8_9BRAD	A0A318TEI8	Rhodopseudomonas faecalis	1.4577	0.218747	3283.16	3769.54	1.14814	0.21189
DNA helicase/exodeoxyribonuclease V subunit B	tr|A0A318TES2|A0A318TES2_9BRAD	A0A318TES2	Rhodopseudomonas faecalis	1.8422	0.0138757	4386.8	7411.21	1.68943	0.152891
Uncharacterized protein DUF1049	tr|A0A318TGV9|A0A318TGV9_9BRAD	A0A318TGV9	Rhodopseudomonas faecalis	1.1498	0.563384	4997.16	5026.68	1.00591	0.966278
Long-chain acyl-CoA synthetase	tr|A0A318TBN6|A0A318TBN6_9BRAD	A0A318TBN6	Rhodopseudomonas faecalis	0.8415	0.37351	11189.7	8987.96	0.803231	0.0405351
histidine kinase (EC 2.7.13.3)	tr|A0A318TDE9|A0A318TDE9_9BRAD	A0A318TDE9	Rhodopseudomonas faecalis	0.9018	0.719293	5156.7	5350.86	1.03765	0.754838
Dihydroorotase	tr|A0A318THZ8|A0A318THZ8_9BRAD	A0A318THZ8	Rhodopseudomonas faecalis	1.478	0.0596336	10134.2	13413.6	1.3236	0.064494
SLH domain-containing protein	tr|A0A318TN54|A0A318TN54_9BRAD	A0A318TN54	Rhodopseudomonas faecalis	0.9123	0.810837	2670.42	2294.67	0.859291	0.590749
Leucyl/phenylalanyl-tRNA--protein transferase (EC 2.3.2.6) (L/F-transferase) (Leucyltransferase) (Phenyalanyltransferase)	tr|A0A318TFX1|A0A318TFX1_9BRAD	A0A318TFX1	Rhodopseudomonas faecalis	2.4534	0.0230002	4372.2	7623.2	1.74356	0.00325123
Flagellar hook protein FlgE	tr|A0A318T905|A0A318T905_9BRAD	A0A318T905	Rhodopseudomonas faecalis	1.0494	0.895852	1942.68	1503.3	0.773828	0.0786166
PBP family phospholipid-binding protein	tr|A0A318TFD4|A0A318TFD4_9BRAD	A0A318TFD4	Rhodopseudomonas faecalis	2.4237	0.00911067	39669.3	83883.5	2.11457	5.03053e-05
Phenylacetate-coenzyme A ligase (EC 6.2.1.30) (Phenylacetyl-CoA ligase)	tr|A0A318TXK6|A0A318TXK6_9BRAD	A0A318TXK6	Rhodopseudomonas faecalis	0.2799	0.00251184	11135.3	4001.54	0.359357	0.000833447
Superoxide dismutase (EC 1.15.1.1)	tr|A0A318TJ39|A0A318TJ39_9BRAD	A0A318TJ39	Rhodopseudomonas faecalis	1.1882	0.43349	25620	28603.9	1.11647	0.453025
Polyhydroxyalkanoate synthase	tr|A0A318TGA1|A0A318TGA1_9BRAD	A0A318TGA1	Rhodopseudomonas faecalis	3.8938	0.00130636	2941.32	3633.51	1.23533	0.170239
Xanthine-guanine phosphoribosyltransferase (XGPRT) (EC 2.4.2.22) (Xanthine phosphoribosyltransferase)	tr|A0A318TKA7|A0A318TKA7_9BRAD	A0A318TKA7	Rhodopseudomonas faecalis	2.013	0.470596	9282.54	9674.85	1.04226	0.897648
Fis family two component transcriptional regulator	tr|A0A318T9A3|A0A318T9A3_9BRAD	A0A318T9A3	Rhodopseudomonas faecalis	2.49	0.00794785	52154.8	111835	2.14429	0.00313684
GTPase Obg (EC 3.6.5.-) (GTP-binding protein Obg)	tr|A0A318TP75|A0A318TP75_9BRAD	A0A318TP75	Rhodopseudomonas faecalis	1.0053	0.985487	6464.29	5879.36	0.909513	0.206764
Precorrin-4 C11-methyltransferase	tr|A0A318TEJ1|A0A318TEJ1_9BRAD	A0A318TEJ1	Rhodopseudomonas faecalis	0.9053	0.630806	7906.76	6105.94	0.772242	0.0069518
Nitronate monooxygenase	tr|A0A318THH4|A0A318THH4_9BRAD	A0A318THH4	Rhodopseudomonas faecalis	0.9533	0.899962	23923.4	19753.3	0.825691	0.157511
MucR family transcriptional regulator	tr|A0A318TM12|A0A318TM12_9BRAD	A0A318TM12	Rhodopseudomonas faecalis	0.966	0.88675	4057.06	3701.3	0.912311	0.120019
Flagellar hook-associated protein 1	tr|A0A318TCH4|A0A318TCH4_9BRAD	A0A318TCH4	Rhodopseudomonas faecalis	1.0715	0.886656	1076.85	2112.57	1.96181	0.200613
Chorismate synthase (CS) (EC 4.2.3.5) (5-enolpyruvylshikimate-3-phosphate phospholyase)	tr|A0A318TDG9|A0A318TDG9_9BRAD	A0A318TDG9	Rhodopseudomonas faecalis	1.2524	0.41606	6249.11	6080.38	0.973	0.661518
Uncharacterized protein DUF2865	tr|A0A318TMJ3|A0A318TMJ3_9BRAD	A0A318TMJ3	Rhodopseudomonas faecalis	0.3716	0.0043684	3126.02	2568.59	0.821681	0.186511
Malonyl CoA-acyl carrier protein transacylase (EC 2.3.1.39)	tr|A0A318TEI2|A0A318TEI2_9BRAD	A0A318TEI2	Rhodopseudomonas faecalis	0.973	0.890582	27754.7	23900.8	0.861144	0.0259444
Flagellin-like hook-associated protein FlgL	tr|A0A318TPI9|A0A318TPI9_9BRAD	A0A318TPI9	Rhodopseudomonas faecalis	0.9747	0.93139	1558.52	1296.19	0.831682	0.221556
Peptidase T	tr|A0A318U0J7|A0A318U0J7_9BRAD	A0A318U0J7	Rhodopseudomonas faecalis	0.8093	0.539544	6650.94	5727.64	0.861178	0.171537
DUF465 domain-containing protein	tr|A0A318TDB9|A0A318TDB9_9BRAD	A0A318TDB9	Rhodopseudomonas faecalis	0.9639	0.919153	14503.2	13376.6	0.922322	0.789432
Signal peptide peptidase A	tr|A0A318TET2|A0A318TET2_9BRAD	A0A318TET2	Rhodopseudomonas faecalis	1.0096	0.974607	3419.28	3037.74	0.888416	0.60514
N5-carboxyaminoimidazole ribonucleotide mutase (N5-CAIR mutase) (EC 5.4.99.18) (5-(carboxyamino)imidazole ribonucleotide mutase)	tr|A0A318TD77|A0A318TD77_9BRAD	A0A318TD77	Rhodopseudomonas faecalis	1.1617	0.463054	8357.78	8351.36	0.999232	0.995789
Lipoprotein-releasing system permease protein	tr|A0A318TLV9|A0A318TLV9_9BRAD	A0A318TLV9	Rhodopseudomonas faecalis	2.0585	0.142867	1108.09	1858.84	1.67752	0.116275
Ribonuclease E (RNase E) (EC 3.1.26.12)	tr|A0A318TF30|A0A318TF30_9BRAD	A0A318TF30	Rhodopseudomonas faecalis	1.1329	0.656595	10533	10809.5	1.02625	0.797431
Lipopolysaccharide export system ATP-binding protein	tr|A0A318TH17|A0A318TH17_9BRAD	A0A318TH17	Rhodopseudomonas faecalis	1.1339	0.83248	1415.2	1571.17	1.11021	0.737223
3-methylfumaryl-CoA hydratase	tr|A0A318TGM0|A0A318TGM0_9BRAD	A0A318TGM0	Rhodopseudomonas faecalis	0.82	0.543338	15200.2	10804.6	0.710817	0.106488
RNA polymerase sigma-70 factor (ECF subfamily)	tr|A0A318TPG1|A0A318TPG1_9BRAD	A0A318TPG1	Rhodopseudomonas faecalis	1.4969	0.141279	2031.06	1950.24	0.96021	0.872164
Inositol-1-monophosphatase (EC 3.1.3.25)	tr|A0A318TD85|A0A318TD85_9BRAD	A0A318TD85	Rhodopseudomonas faecalis	0.9115	0.653343	9047.31	7519.25	0.831104	0.029241
Integration host factor subunit alpha (IHF-alpha)	tr|A0A318TL44|A0A318TL44_9BRAD	A0A318TL44	Rhodopseudomonas faecalis	0.8337	0.40472	17326.9	13327.8	0.769195	0.0252311
Rhodanese-related sulfurtransferase	tr|A0A318TTC1|A0A318TTC1_9BRAD	A0A318TTC1	Rhodopseudomonas faecalis	1.3367	0.300602	11141.7	12992.3	1.16609	0.214386
Tat pathway signal sequence	tr|A0A318TKT0|A0A318TKT0_9BRAD	A0A318TKT0	Rhodopseudomonas faecalis	0.7195	0.157578	9907.74	6890.74	0.69549	0.0252345
Quinolinate synthase (EC 2.5.1.72)	tr|A0A318TGR8|A0A318TGR8_9BRAD	A0A318TGR8	Rhodopseudomonas faecalis	1.6235	0.0303083	4035.21	5504.01	1.364	0.00363781
Lipoprotein-anchoring transpeptidase ErfK/SrfK	tr|A0A318T733|A0A318T733_9BRAD	A0A318T733	Rhodopseudomonas faecalis	0.6924	0.337525	11890.7	8392.68	0.70582	0.114776
30S ribosomal protein S16	tr|A0A318TAJ2|A0A318TAJ2_9BRAD	A0A318TAJ2	Rhodopseudomonas faecalis	0.6659	0.201742	196848	131770	0.669398	0.0607831
Metal dependent phosphohydrolase	tr|A0A318TH87|A0A318TH87_9BRAD	A0A318TH87	Rhodopseudomonas faecalis	0.9756	0.874528	3439.62	#VALUE!	#VALUE!	#VALUE!
Iron-sulfur cluster carrier protein	tr|A0A318TK27|A0A318TK27_9BRAD	A0A318TK27	Rhodopseudomonas faecalis	0.9518	0.825362	8802.82	8515.07	0.967311	0.500778
Alkyl hydroperoxide reductase C (Peroxiredoxin) (Thioredoxin peroxidase)	tr|A0A318TK42|A0A318TK42_9BRAD	A0A318TK42	Rhodopseudomonas faecalis	0.6398	0.240945	50113.6	30702.6	0.61266	0.260697
Outer membrane protein	tr|A0A318TAD2|A0A318TAD2_9BRAD	A0A318TAD2	Rhodopseudomonas faecalis	2.7071	0.00773374	57014.1	139604	2.44858	0.0014266
Adenylyl-sulfate kinase (EC 2.7.1.25) (APS kinase) (ATP adenosine-5'-phosphosulfate 3'-phosphotransferase) (Adenosine-5'-phosphosulfate kinase)	tr|A0A318TCK2|A0A318TCK2_9BRAD	A0A318TCK2	Rhodopseudomonas faecalis	0.7602	0.379886	48024.2	32154.7	0.669552	0.0256916
Bifunctional adenosylcobalamin biosynthesis protein (EC 2.7.1.156) (EC 2.7.7.62)	tr|A0A318TE16|A0A318TE16_9BRAD	A0A318TE16	Rhodopseudomonas faecalis	2.0325	0.166409	1576.48	2003.67	1.27098	0.319288
GST-like protein	tr|A0A318T7C6|A0A318T7C6_9BRAD	A0A318T7C6	Rhodopseudomonas faecalis	2.6462	0.0189309	4019.63	7042.42	1.75201	0.0694266
Ribosome hibernation promoting factor (HPF)	tr|A0A318TCN1|A0A318TCN1_9BRAD	A0A318TCN1	Rhodopseudomonas faecalis	2.1976	0.00580121	67910.3	134244	1.97678	0.00149151
Mg-protoporphyrin IX methyltransferase	tr|A0A318TT13|A0A318TT13_9BRAD	A0A318TT13	Rhodopseudomonas faecalis	0.3554	0.00801882	5918.7	3460.91	0.584741	0.0137042
histidine kinase (EC 2.7.13.3)	tr|A0A318T7N5|A0A318T7N5_9BRAD	A0A318T7N5	Rhodopseudomonas faecalis	1.4659	0.1399	3304.81	4370.34	1.32242	0.0787423
O-succinylhomoserine sulfhydrylase (OSH sulfhydrylase) (OSHS sulfhydrylase) (EC 2.5.1.-)	tr|A0A318TN96|A0A318TN96_9BRAD	A0A318TN96	Rhodopseudomonas faecalis	1.1524	0.471133	14926.7	15516.8	1.03953	0.767808
Transcription-repair-coupling factor (TRCF) (EC 3.6.4.-)	tr|A0A318TVQ2|A0A318TVQ2_9BRAD	A0A318TVQ2	Rhodopseudomonas faecalis	0.8326	0.333846	5068.05	6818.52	1.34539	0.498686
50S ribosomal protein L30	tr|A0A318TCS5|A0A318TCS5_9BRAD	A0A318TCS5	Rhodopseudomonas faecalis	0.8477	0.582394	160577	116395	0.724855	0.132671
Trans-aconitate 2-methyltransferase (EC 2.1.1.144)	tr|A0A318TQ32|A0A318TQ32_9BRAD	A0A318TQ32	Rhodopseudomonas faecalis	1.8744	0.0571291	2970.24	4496.77	1.51394	0.0118193
Uridylate kinase (UK) (EC 2.7.4.22) (Uridine monophosphate kinase) (UMP kinase) (UMPK)	tr|A0A318TKR4|A0A318TKR4_9BRAD	A0A318TKR4	Rhodopseudomonas faecalis	1.4157	0.0953869	13112.1	16658.2	1.27045	0.0368712
Amino acid/amide ABC transporter substrate-binding protein (HAAT family)	tr|A0A318TAN8|A0A318TAN8_9BRAD	A0A318TAN8	Rhodopseudomonas faecalis	0.8726	0.497949	7754.42	6068.04	0.782527	0.0148776
Ubiquinone biosynthesis protein UbiV	tr|A0A318TEE8|A0A318TEE8_9BRAD	A0A318TEE8	Rhodopseudomonas faecalis	0.9677	0.893253	17453	15035.3	0.861476	0.108291
Glucokinase (EC 2.7.1.2) (Glucose kinase)	tr|A0A318TLZ5|A0A318TLZ5_9BRAD	A0A318TLZ5	Rhodopseudomonas faecalis	1.1133	0.562987	3458.52	3407.41	0.985222	0.832008
Microcin-processing peptidase 2	tr|A0A318TIN5|A0A318TIN5_9BRAD	A0A318TIN5	Rhodopseudomonas faecalis	1.5126	0.181502	6243.65	7561.71	1.2111	0.151418
2,3-bisphosphoglycerate-dependent phosphoglycerate mutase (BPG-dependent PGAM) (PGAM) (Phosphoglyceromutase) (dPGM) (EC 5.4.2.11)	tr|A0A318TBU7|A0A318TBU7_9BRAD	A0A318TBU7	Rhodopseudomonas faecalis	0.8971	0.669388	40685.2	31983.4	0.78612	0.0417908
DUF815 domain-containing protein	tr|A0A318TGT1|A0A318TGT1_9BRAD	A0A318TGT1	Rhodopseudomonas faecalis	1.3134	0.148732	6975.37	8151.24	1.16857	0.00966603
Phosphoribosylglycinamide formyltransferase (EC 2.1.2.2) (5'-phosphoribosylglycinamide transformylase) (GAR transformylase) (GART)	tr|A0A318TFI4|A0A318TFI4_9BRAD	A0A318TFI4	Rhodopseudomonas faecalis	1.0117	0.959366	4668.81	4232.81	0.906616	0.274346
DUF1134 domain-containing protein	tr|A0A318TGP6|A0A318TGP6_9BRAD	A0A318TGP6	Rhodopseudomonas faecalis	0.7318	0.249389	33618.1	22566.3	0.671255	0.0154934
Fatty-acyl-CoA synthase	tr|A0A318TQ38|A0A318TQ38_9BRAD	A0A318TQ38	Rhodopseudomonas faecalis	0.7396	0.150573	8595.81	5865.81	0.682403	0.000302276
Amino acid/amide ABC transporter substrate-binding protein (HAAT family)	tr|A0A318TAP6|A0A318TAP6_9BRAD	A0A318TAP6	Rhodopseudomonas faecalis	0.999	0.994954	5437.74	5048.16	0.928356	0.397887
Aminoglycoside phosphotransferase (APT) family kinase protein	tr|A0A318TAN7|A0A318TAN7_9BRAD	A0A318TAN7	Rhodopseudomonas faecalis	1.2117	0.414412	2379.1	2338.16	0.982789	0.921459
Signal peptide protein	tr|A0A318TKA4|A0A318TKA4_9BRAD	A0A318TKA4	Rhodopseudomonas faecalis	0.981	0.940337	16128.4	14359.6	0.89033	0.266903
Diguanylate cyclase	tr|A0A318TNU0|A0A318TNU0_9BRAD	A0A318TNU0	Rhodopseudomonas faecalis	0.5815	0.0743824	4004.65	3359.36	0.838865	0.0671171
6,7-dimethyl-8-ribityllumazine synthase (DMRL synthase) (LS) (Lumazine synthase) (EC 2.5.1.78)	tr|A0A318TA46|A0A318TA46_9BRAD	A0A318TA46	Rhodopseudomonas faecalis	1.1701	0.550866	11009.3	11621.3	1.05559	0.646776
Nitrogenase molybdenum-iron protein beta chain (EC 1.18.6.1) (Dinitrogenase)	tr|A0A318TQF9|A0A318TQF9_9BRAD	A0A318TQF9	Rhodopseudomonas faecalis	1.0102	0.961562	5372.73	4878.34	0.907982	0.62953
Diguanylate cyclase/phosphodiesterase with PAS/PAC sensor(S)	tr|A0A318TL73|A0A318TL73_9BRAD	A0A318TL73	Rhodopseudomonas faecalis	1.7146	0.0895507	1642.2	1866.47	1.13657	0.56849
Carbamoyltransferase	tr|A0A318TEG2|A0A318TEG2_9BRAD	A0A318TEG2	Rhodopseudomonas faecalis	0.7225	0.30367	3637.8	3120.42	0.857777	0.379564
Lysyl-tRNA synthetase class 2	tr|A0A318TF49|A0A318TF49_9BRAD	A0A318TF49	Rhodopseudomonas faecalis	1.0964	0.558129	2322.63	2196.38	0.945646	0.726274
2-octaprenyl-3-methyl-6-methoxy-1,4-benzoquinol hydroxylase	tr|A0A318TGE3|A0A318TGE3_9BRAD	A0A318TGE3	Rhodopseudomonas faecalis	1.9079	0.0375141	14870.4	24355.2	1.63784	0.000601357
3-octaprenyl-4-hydroxybenzoate decarboxylase	tr|A0A318TE74|A0A318TE74_9BRAD	A0A318TE74	Rhodopseudomonas faecalis	1.1539	0.413979	11272.3	11677.2	1.03592	0.273276
Amino acid/amide ABC transporter ATP-binding protein 2 (HAAT family)	tr|A0A318TNB7|A0A318TNB7_9BRAD	A0A318TNB7	Rhodopseudomonas faecalis	1.1795	0.431357	5997.24	6238.63	1.04025	0.721838
Cysteine--tRNA ligase (EC 6.1.1.16) (Cysteinyl-tRNA synthetase) (CysRS)	tr|A0A318TJN8|A0A318TJN8_9BRAD	A0A318TJN8	Rhodopseudomonas faecalis	1.0926	0.699081	5302.95	5272.73	0.994301	0.958825
Dihydropteroate synthase (DHPS) (EC 2.5.1.15) (Dihydropteroate pyrophosphorylase)	tr|A0A318TJ49|A0A318TJ49_9BRAD	A0A318TJ49	Rhodopseudomonas faecalis	1.3249	0.173076	18601.8	22202	1.19354	0.120194
Outer membrane protein OmpA-like peptidoglycan-associated protein	tr|A0A318TCA8|A0A318TCA8_9BRAD	A0A318TCA8	Rhodopseudomonas faecalis	1.1732	0.560228	27615.8	27647.7	1.00116	0.994466
Phosphofructokinase	tr|A0A318TXZ6|A0A318TXZ6_9BRAD	A0A318TXZ6	Rhodopseudomonas faecalis	1.7602	0.0577821	8332.52	14836	1.78049	0.00311117
Delta-aminolevulinic acid dehydratase (EC 4.2.1.24)	tr|A0A318TPG9|A0A318TPG9_9BRAD	A0A318TPG9	Rhodopseudomonas faecalis	0.9423	0.775171	38137.1	32079	0.841148	0.0203383
O-acetylhomoserine sulfhydrylase	tr|A0A318T7W0|A0A318T7W0_9BRAD	A0A318T7W0	Rhodopseudomonas faecalis	1.6767	0.0778245	8088.37	12204.2	1.50886	0.00234962
Dihydroorotase	tr|A0A318TEL3|A0A318TEL3_9BRAD	A0A318TEL3	Rhodopseudomonas faecalis	0.8804	0.559861	8363.52	7603.64	0.909144	0.0847876
Translation initiation factor 3 (BIF-3)	tr|A0A318TE70|A0A318TE70_9BRAD	A0A318TE70	Rhodopseudomonas faecalis	0.9326	0.672775	10761.7	8878.09	0.82497	0.117157
Precorrin-2/cobalt-factor-2 C20-methyltransferase	tr|A0A318TU15|A0A318TU15_9BRAD	A0A318TU15	Rhodopseudomonas faecalis	0.6262	0.356535	6473.52	4911.03	0.758633	0.0563373
Ribulose bisphosphate carboxylase large chain (RuBisCO large subunit) (EC 4.1.1.39)	tr|A0A318TIA4|A0A318TIA4_9BRAD	A0A318TIA4	Rhodopseudomonas faecalis	1.2742	0.52714	8683.73	9607.29	1.10636	0.717761
TPR repeat protein	tr|A0A318TKJ5|A0A318TKJ5_9BRAD	A0A318TKJ5	Rhodopseudomonas faecalis	0.5378	0.0823471	3835.58	2678.16	0.69824	0.0444765
Iron complex transport system substrate-binding protein	tr|A0A318TIH6|A0A318TIH6_9BRAD	A0A318TIH6	Rhodopseudomonas faecalis	2.0586	0.191077	920.663	2055.69	2.23284	0.131793
Protein translocase subunit SecD	tr|A0A318TGX4|A0A318TGX4_9BRAD	A0A318TGX4	Rhodopseudomonas faecalis	0.9122	0.738255	5612.71	4592.96	0.818313	0.121726
Ammonium transporter	tr|A0A318TH51|A0A318TH51_9BRAD	A0A318TH51	Rhodopseudomonas faecalis	0.9943	0.987339	3615.47	3872.34	1.07105	0.751574
Single-stranded DNA-binding protein (SSB)	tr|A0A318THE7|A0A318THE7_9BRAD	A0A318THE7	Rhodopseudomonas faecalis	1.1076	0.702615	41838.8	41186.1	0.984399	0.88709
DNA topoisomerase 4 subunit A (EC 5.6.2.2) (Topoisomerase IV subunit A)	tr|A0A318TVT3|A0A318TVT3_9BRAD	A0A318TVT3	Rhodopseudomonas faecalis	0.6859	0.318002	#VALUE!	2354.46	#VALUE!	#VALUE!
Putative photosynthetic complex assembly protein	tr|A0A318TDZ9|A0A318TDZ9_9BRAD	A0A318TDZ9	Rhodopseudomonas faecalis	0.4065	0.00751847	11789	4651.16	0.394535	1.72273e-05
dITP/XTP pyrophosphatase (EC 3.6.1.66) (Non-canonical purine NTP pyrophosphatase) (Non-standard purine NTP pyrophosphatase) (Nucleoside-triphosphate diphosphatase) (Nucleoside-triphosphate pyrophosphatase) (NTPase)	tr|A0A318TC32|A0A318TC32_9BRAD	A0A318TC32	Rhodopseudomonas faecalis	1.423	0.167699	11726.3	11721.2	0.99956	0.998716
Valine--tRNA ligase (EC 6.1.1.9) (Valyl-tRNA synthetase) (ValRS)	tr|A0A318TDF8|A0A318TDF8_9BRAD	A0A318TDF8	Rhodopseudomonas faecalis	0.9714	0.880258	8473.92	7398.54	0.873096	0.00473425
Nucleoside diphosphate kinase (NDK) (NDP kinase) (EC 2.7.4.6) (Nucleoside-2-P kinase)	tr|A0A318TEL6|A0A318TEL6_9BRAD	A0A318TEL6	Rhodopseudomonas faecalis	1.1534	0.567978	#VALUE!	85725.3	#VALUE!	#VALUE!
30S ribosomal protein S2	tr|A0A318U0M4|A0A318U0M4_9BRAD	A0A318U0M4	Rhodopseudomonas faecalis	0.9167	0.699836	126397	102836	0.813599	0.00491871
Uncharacterized protein YndB with AHSA1/START domain	tr|A0A318TE85|A0A318TE85_9BRAD	A0A318TE85	Rhodopseudomonas faecalis	0.8626	0.570871	20553.3	16766.4	0.81575	0.0562173
3-hydroxybutyrate dehydrogenase	tr|A0A318THP8|A0A318THP8_9BRAD	A0A318THP8	Rhodopseudomonas faecalis	1.4476	0.117226	7765.45	10041.4	1.29309	0.0222777
Histone	tr|A0A318TEB6|A0A318TEB6_9BRAD	A0A318TEB6	Rhodopseudomonas faecalis	1.9786	0.0714282	38519.9	67297.9	1.7471	0.0167578
Phenylalanine--tRNA ligase alpha subunit (EC 6.1.1.20) (Phenylalanyl-tRNA synthetase alpha subunit) (PheRS)	tr|A0A318TE26|A0A318TE26_9BRAD	A0A318TE26	Rhodopseudomonas faecalis	0.9551	0.832683	9429.03	8199.33	0.869584	0.0194622
Peptidyl-prolyl cis-trans isomerase (PPIase) (EC 5.2.1.8)	tr|A0A318TJ06|A0A318TJ06_9BRAD	A0A318TJ06	Rhodopseudomonas faecalis	1.0444	0.878679	15545.9	14603.9	0.939404	0.714409
GLPGLI family protein	tr|A0A318TAM3|A0A318TAM3_9BRAD	A0A318TAM3	Rhodopseudomonas faecalis	0.8403	0.514627	11214.3	9330.08	0.831983	0.120394
Succinyl-CoA:acetate CoA-transferase	tr|A0A318TI25|A0A318TI25_9BRAD	A0A318TI25	Rhodopseudomonas faecalis	0.3572	0.0103888	24796.9	7760.57	0.312965	0.00569376
TPR_21 domain-containing protein	tr|A0A318TUM5|A0A318TUM5_9BRAD	A0A318TUM5	Rhodopseudomonas faecalis	1.1081	0.726773	6906.79	6754.07	0.977888	0.810098
Carbonic anhydrase (EC 4.2.1.1)	tr|A0A318TIK1|A0A318TIK1_9BRAD	A0A318TIK1	Rhodopseudomonas faecalis	0.8384	0.234287	7788.6	6712.65	0.861855	0.321571
Citronellol/citronellal dehydrogenase	tr|A0A318TB74|A0A318TB74_9BRAD	A0A318TB74	Rhodopseudomonas faecalis	2.8203	0.00386522	15264.2	33692	2.20725	7.36369e-05
Cytidylate kinase (CK) (EC 2.7.4.25) (Cytidine monophosphate kinase) (CMP kinase)	tr|A0A318TBD4|A0A318TBD4_9BRAD	A0A318TBD4	Rhodopseudomonas faecalis	1.047	0.848803	6540.24	5903.59	0.902657	0.290167
Ubiquinone/menaquinone biosynthesis C-methylase UbiE	tr|A0A318THN5|A0A318THN5_9BRAD	A0A318THN5	Rhodopseudomonas faecalis	0.8524	0.523732	5615.33	6192.2	1.10273	0.388816
KipI family sensor histidine kinase inhibitor	tr|A0A318TGJ9|A0A318TGJ9_9BRAD	A0A318TGJ9	Rhodopseudomonas faecalis	1.1106	0.499958	5318.93	5302.87	0.99698	0.984184
nicotinate-nucleotide diphosphorylase (carboxylating) (EC 2.4.2.19) (Quinolinate phosphoribosyltransferase [decarboxylating])	tr|A0A318TI06|A0A318TI06_9BRAD	A0A318TI06	Rhodopseudomonas faecalis	1.3791	0.175334	5636	6218.15	1.10329	0.346856
Citrate synthase	tr|A0A318TLX9|A0A318TLX9_9BRAD	A0A318TLX9	Rhodopseudomonas faecalis	1.0795	0.771504	33737.5	32232	0.955375	0.674614
Phytase-like domain-containing protein	tr|A0A318T9A9|A0A318T9A9_9BRAD	A0A318T9A9	Rhodopseudomonas faecalis	1.4465	0.161969	3062.16	4014.62	1.31104	0.0669624
Cysteine synthase A	tr|A0A318TRB2|A0A318TRB2_9BRAD	A0A318TRB2	Rhodopseudomonas faecalis	1.5593	0.129941	6871.68	9611.73	1.39875	0.0640825
Tyrosine--tRNA ligase (EC 6.1.1.1) (Tyrosyl-tRNA synthetase) (TyrRS)	tr|A0A318TNV0|A0A318TNV0_9BRAD	A0A318TNV0	Rhodopseudomonas faecalis	1.1334	0.597549	28466.6	28474.5	1.00028	0.996395
Glycine--tRNA ligase beta subunit (EC 6.1.1.14) (Glycyl-tRNA synthetase beta subunit) (GlyRS)	tr|A0A318TWU0|A0A318TWU0_9BRAD	A0A318TWU0	Rhodopseudomonas faecalis	0.957	0.833601	9428.15	7985.94	0.847031	0.0144017
Elongation factor Tu (EF-Tu)	tr|A0A318TPV2|A0A318TPV2_9BRAD	A0A318TPV2	Rhodopseudomonas faecalis	0.922	0.72419	373488	305202	0.817168	0.00683829
GMP reductase (EC 1.7.1.7) (Guanosine 5'-monophosphate oxidoreductase) (Guanosine monophosphate reductase)	tr|A0A318TN35|A0A318TN35_9BRAD	A0A318TN35	Rhodopseudomonas faecalis	1.4356	0.34666	6299.47	5579.79	0.885756	0.676092
serine O-acetyltransferase (EC 2.3.1.30)	tr|A0A318TTA4|A0A318TTA4_9BRAD	A0A318TTA4	Rhodopseudomonas faecalis	0.3929	0.0061353	5052.85	1847.42	0.365619	0.0014
3-oxoacid CoA-transferase subunit B	tr|A0A318TL49|A0A318TL49_9BRAD	A0A318TL49	Rhodopseudomonas faecalis	0.9798	0.961047	24569.5	21920.4	0.892178	0.609492
OOP family OmpA-OmpF porin	tr|A0A318TAR1|A0A318TAR1_9BRAD	A0A318TAR1	Rhodopseudomonas faecalis	1.3179	0.23406	6494.65	7128.51	1.0976	0.141035
Sugar/nucleoside kinase (Ribokinase family)	tr|A0A318T9R7|A0A318T9R7_9BRAD	A0A318T9R7	Rhodopseudomonas faecalis	0.8507	0.515301	11319.2	8415.2	0.743448	0.0308141
HK97 family phage portal protein	tr|A0A318TM39|A0A318TM39_9BRAD	A0A318TM39	Rhodopseudomonas faecalis	1.0421	0.907203	3207.79	3900.88	1.21607	0.515958
50S ribosomal protein L24	tr|A0A318TA80|A0A318TA80_9BRAD	A0A318TA80	Rhodopseudomonas faecalis	0.756	0.358303	77916.9	50455.5	0.647555	0.0497993
Cytochrome b	tr|A0A318TIA3|A0A318TIA3_9BRAD	A0A318TIA3	Rhodopseudomonas faecalis	0.8254	0.504729	11092	8469.53	0.763572	0.123657
7-cyano-7-deazaguanine synthase (EC 6.3.4.20) (7-cyano-7-carbaguanine synthase) (PreQ(0) synthase) (Queuosine biosynthesis protein QueC)	tr|A0A318TW29|A0A318TW29_9BRAD	A0A318TW29	Rhodopseudomonas faecalis	1.2399	0.308393	3058.74	3666.08	1.19856	0.146923
Enoyl-[acyl-carrier-protein] reductase [NADH] (EC 1.3.1.9)	tr|A0A318T986|A0A318T986_9BRAD	A0A318T986	Rhodopseudomonas faecalis	1.0787	0.719625	26125.3	25113.7	0.961277	0.43124
Acyl dehydratase	tr|A0A318T8V9|A0A318T8V9_9BRAD	A0A318T8V9	Rhodopseudomonas faecalis	1.5902	0.047188	6452.75	8710.3	1.34986	0.00342715
50S ribosomal protein L10	tr|A0A318TEP0|A0A318TEP0_9BRAD	A0A318TEP0	Rhodopseudomonas faecalis	0.9469	0.827357	138998	115380	0.830086	0.0847464
Ubiquinol-cytochrome c reductase iron-sulfur subunit (EC 7.1.1.8)	tr|A0A318TR75|A0A318TR75_9BRAD	A0A318TR75	Rhodopseudomonas faecalis	0.886	0.654167	18708.5	12931.5	0.691208	0.0223276
Acyl-CoA dehydrogenase	tr|A0A318TFY2|A0A318TFY2_9BRAD	A0A318TFY2	Rhodopseudomonas faecalis	0.9831	0.936144	12710.3	11127.8	0.875496	0.0122858
2-oxoglutarate dehydrogenase E1 component (EC 1.2.4.2) (Alpha-ketoglutarate dehydrogenase)	tr|A0A318TG50|A0A318TG50_9BRAD	A0A318TG50	Rhodopseudomonas faecalis	1.0615	0.763744	11074.9	10465.1	0.94494	0.151553
LemA protein	tr|A0A318TAL4|A0A318TAL4_9BRAD	A0A318TAL4	Rhodopseudomonas faecalis	1.3989	0.464087	5629.54	6022.62	1.06982	0.591624
Microcin C transport system substrate-binding protein	tr|A0A318T9V5|A0A318T9V5_9BRAD	A0A318T9V5	Rhodopseudomonas faecalis	1.0785	0.76388	3244.16	3196.36	0.985268	0.891742
Exodeoxyribonuclease 7 small subunit (EC 3.1.11.6) (Exodeoxyribonuclease VII small subunit) (Exonuclease VII small subunit)	tr|A0A318TLE5|A0A318TLE5_9BRAD	A0A318TLE5	Rhodopseudomonas faecalis	1.262	0.384206	13979.2	15258.6	1.09152	0.510291
HAD superfamily hydrolase (TIGR01509 family)	tr|A0A318TBN1|A0A318TBN1_9BRAD	A0A318TBN1	Rhodopseudomonas faecalis	11.9207	4.2583e-05	19902.6	206121	10.3565	0.00035002
DNA topoisomerase 4 subunit B (EC 5.6.2.2) (Topoisomerase IV subunit B)	tr|A0A318TIB9|A0A318TIB9_9BRAD	A0A318TIB9	Rhodopseudomonas faecalis	0.668	0.0996978	4428.57	2726.06	0.615562	0.0052222
Acyl-CoA dehydrogenase	tr|A0A318TL56|A0A318TL56_9BRAD	A0A318TL56	Rhodopseudomonas faecalis	1.8095	0.0211859	21893	34636.1	1.58207	0.000547474
Xre family transcriptional regulator	tr|A0A318TPD6|A0A318TPD6_9BRAD	A0A318TPD6	Rhodopseudomonas faecalis	0.911	0.688018	27852.7	22333.1	0.801828	0.0616231
DUF1674 domain-containing protein	tr|A0A318TBA7|A0A318TBA7_9BRAD	A0A318TBA7	Rhodopseudomonas faecalis	0.8879	0.679459	6404.47	4931.91	0.770073	0.127638
Uncharacterized protein DUF992	tr|A0A318T8T1|A0A318T8T1_9BRAD	A0A318T8T1	Rhodopseudomonas faecalis	1.0692	0.748369	201903	190025	0.941169	0.72572
Riboflavin synthase alpha chain	tr|A0A318TL37|A0A318TL37_9BRAD	A0A318TL37	Rhodopseudomonas faecalis	0.9905	0.961218	4186.17	4117.17	0.983518	0.901785
Poly(3-hydroxybutyrate) depolymerase	tr|A0A318TDG0|A0A318TDG0_9BRAD	A0A318TDG0	Rhodopseudomonas faecalis	1.1821	0.390705	5234.44	5512.07	1.05304	0.522783
Probable inorganic carbon transporter subunit DabA	tr|A0A318T842|A0A318T842_9BRAD	A0A318T842	Rhodopseudomonas faecalis	3.354	0.00932076	12391.9	36121.3	2.91492	0.00609138
Peptidyl-prolyl cis-trans isomerase (PPIase) (EC 5.2.1.8)	tr|A0A318TDD5|A0A318TDD5_9BRAD	A0A318TDD5	Rhodopseudomonas faecalis	1.1571	0.621375	15989.8	17380.9	1.087	0.695064
Nitric oxide reductase NorQ protein	tr|A0A318TC67|A0A318TC67_9BRAD	A0A318TC67	Rhodopseudomonas faecalis	1.6772	0.144934	288247	407997	1.41544	0.0815915
Nitrogen regulatory protein P-II	tr|A0A318TKM7|A0A318TKM7_9BRAD	A0A318TKM7	Rhodopseudomonas faecalis	1.2035	0.470154	51812.3	55297.5	1.06727	0.613833
Xaa-Pro aminopeptidase	tr|A0A318T9L0|A0A318T9L0_9BRAD	A0A318T9L0	Rhodopseudomonas faecalis	0.978	0.922226	3821.42	3291.69	0.861377	0.0310162
Phosphoribosylaminoimidazole-succinocarboxamide synthase (EC 6.3.2.6) (SAICAR synthetase)	tr|A0A318T8F1|A0A318T8F1_9BRAD	A0A318T8F1	Rhodopseudomonas faecalis	1.1186	0.666402	13761.2	13216.9	0.960446	0.737439
UDP-N-acetylglucosamine 1-carboxyvinyltransferase (EC 2.5.1.7) (Enoylpyruvate transferase) (UDP-N-acetylglucosamine enolpyruvyl transferase) (EPT)	tr|A0A318TGZ3|A0A318TGZ3_9BRAD	A0A318TGZ3	Rhodopseudomonas faecalis	0.6751	0.110847	6624.28	4324.49	0.652824	0.00125009
Phosphoenolpyruvate carboxykinase (ATP) (PCK) (PEP carboxykinase) (PEPCK) (EC 4.1.1.49)	tr|A0A318TJ74|A0A318TJ74_9BRAD	A0A318TJ74	Rhodopseudomonas faecalis	0.7373	0.229414	101443	66949	0.659964	0.00161435
Pimeloyl-ACP methyl ester carboxylesterase	tr|A0A318TLM3|A0A318TLM3_9BRAD	A0A318TLM3	Rhodopseudomonas faecalis	1.2966	0.284112	20648.1	23795.3	1.15242	0.0553524
Alpha-1,4 glucan phosphorylase (EC 2.4.1.1)	tr|A0A318T8X4|A0A318T8X4_9BRAD	A0A318T8X4	Rhodopseudomonas faecalis	1.2557	0.301486	6992.49	7623.83	1.09029	0.143372
DUF4124 domain-containing protein	tr|A0A318U0P3|A0A318U0P3_9BRAD	A0A318U0P3	Rhodopseudomonas faecalis	1.1284	0.602437	14485.5	14434.3	0.996468	0.978923
Effector-binding domain-containing protein	tr|A0A318TEB0|A0A318TEB0_9BRAD	A0A318TEB0	Rhodopseudomonas faecalis	1.2015	0.523168	5730.23	6384.5	1.11418	0.498203
FlaA1/EpsC-like NDP-sugar epimerase	tr|A0A318T9J2|A0A318T9J2_9BRAD	A0A318T9J2	Rhodopseudomonas faecalis	1.3712	0.557911	731.806	958.324	1.30953	0.453539
30S ribosomal protein S1	tr|A0A318TBK3|A0A318TBK3_9BRAD	A0A318TBK3	Rhodopseudomonas faecalis	0.8896	0.706847	82281.1	62986.1	0.765499	0.128251
Alanine--tRNA ligase (EC 6.1.1.7) (Alanyl-tRNA synthetase) (AlaRS)	tr|A0A318T811|A0A318T811_9BRAD	A0A318T811	Rhodopseudomonas faecalis	0.9232	0.740075	12779.5	10481.5	0.820179	0.0148013
Ribose-5-phosphate isomerase A (EC 5.3.1.6) (Phosphoriboisomerase A) (PRI)	tr|A0A318TKY2|A0A318TKY2_9BRAD	A0A318TKY2	Rhodopseudomonas faecalis	0.7958	0.333061	14706.3	10551.2	0.717463	0.0176206
DNA-binding protein HU-beta	tr|A0A318TNI3|A0A318TNI3_9BRAD	A0A318TNI3	Rhodopseudomonas faecalis	0.9131	0.658806	119714	97082.3	0.810955	0.00265212
Nucleoside triphosphate pyrophosphatase (EC 3.6.1.9) (Nucleotide pyrophosphatase) (Nucleotide PPase)	tr|A0A318TF25|A0A318TF25_9BRAD	A0A318TF25	Rhodopseudomonas faecalis	1.7943	0.0145907	9005.93	14289.5	1.58668	0.0331851
Hpr(Ser) kinase/phosphatase	tr|A0A318TXU7|A0A318TXU7_9BRAD	A0A318TXU7	Rhodopseudomonas faecalis	1.2266	0.338682	13630	14853.9	1.0898	0.203136
Phosphoserine phosphatase (EC 3.1.3.3) (O-phosphoserine phosphohydrolase)	tr|A0A318TNY3|A0A318TNY3_9BRAD	A0A318TNY3	Rhodopseudomonas faecalis	1.0598	0.774591	8536.72	8039.39	0.941742	0.0593782
FAD assembly factor SdhE	tr|A0A318TKZ1|A0A318TKZ1_9BRAD	A0A318TKZ1	Rhodopseudomonas faecalis	0.7825	0.410503	4948.27	3524.38	0.712246	0.110426
Nucleoid-associated protein BJ122_109140	tr|A0A318TGN0|A0A318TGN0_9BRAD	A0A318TGN0	Rhodopseudomonas faecalis	0.8449	0.511709	17226.6	13052.8	0.757711	0.0488484
S-methyl-5'-thioadenosine phosphorylase (EC 2.4.2.28) (5'-methylthioadenosine phosphorylase) (MTA phosphorylase) (MTAP)	tr|A0A318TAM1|A0A318TAM1_9BRAD	A0A318TAM1	Rhodopseudomonas faecalis	0.9724	0.89816	20613.4	17721.8	0.859719	0.0461383
dTDP-4-amino-4,6-dideoxygalactose transaminase	tr|A0A318TCL3|A0A318TCL3_9BRAD	A0A318TCL3	Rhodopseudomonas faecalis	0.7315	0.25588	25242.2	9045.46	0.358348	0.10236
Serine--tRNA ligase (EC 6.1.1.11) (Seryl-tRNA synthetase) (SerRS) (Seryl-tRNA(Ser/Sec) synthetase)	tr|A0A318TUH3|A0A318TUH3_9BRAD	A0A318TUH3	Rhodopseudomonas faecalis	0.9657	0.840376	11540.2	9962.7	0.863308	0.0258099
DNA-directed RNA polymerase subunit beta (RNAP subunit beta) (EC 2.7.7.6) (RNA polymerase subunit beta) (Transcriptase subunit beta)	tr|A0A318TAF9|A0A318TAF9_9BRAD	A0A318TAF9	Rhodopseudomonas faecalis	0.9308	0.746311	30643.8	25129.1	0.820041	0.00528883
Cysteine desulfurase (EC 2.8.1.7)	tr|A0A318TGH7|A0A318TGH7_9BRAD	A0A318TGH7	Rhodopseudomonas faecalis	1.6118	0.341924	9089.75	13905.8	1.52983	0.223201
Alpha-2-macroglobulin	tr|A0A318TNT9|A0A318TNT9_9BRAD	A0A318TNT9	Rhodopseudomonas faecalis	1.1743	0.567137	2345.33	2747.18	1.17134	0.180625
PASTA domain-containing protein	tr|A0A318T911|A0A318T911_9BRAD	A0A318T911	Rhodopseudomonas faecalis	4.3772	6.77983e-05	99556.9	356323	3.57909	4.48707e-05
Protein-export membrane protein SecF	tr|A0A318THH3|A0A318THH3_9BRAD	A0A318THH3	Rhodopseudomonas faecalis	1.3036	0.527406	2401.31	2669.5	1.11168	0.383961
Enamine deaminase RidA (YjgF/YER057c/UK114 family)	tr|A0A318THF6|A0A318THF6_9BRAD	A0A318THF6	Rhodopseudomonas faecalis	1.3491	0.260722	11369.7	13728.8	1.20749	0.114407
Tryptophanase	tr|A0A318TK49|A0A318TK49_9BRAD	A0A318TK49	Rhodopseudomonas faecalis	0.8806	0.532186	17571.6	13670	0.777957	0.00446485
DNA-binding transcriptional regulator NtrC (Nitrogen regulation protein NR(I))	tr|A0A318TB62|A0A318TB62_9BRAD	A0A318TB62	Rhodopseudomonas faecalis	1.4212	0.168849	5259.99	6348.95	1.20703	0.0300814
Light-independent protochlorophyllide reductase iron-sulfur ATP-binding protein (DPOR subunit L) (LI-POR subunit L) (EC 1.3.7.7)	tr|A0A318TI96|A0A318TI96_9BRAD	A0A318TI96	Rhodopseudomonas faecalis	0.6076	0.0573211	35840.8	19836.3	0.553457	8.63748e-05
Conserved secreted protein	tr|A0A318TLP5|A0A318TLP5_9BRAD	A0A318TLP5	Rhodopseudomonas faecalis	0.6133	0.278998	22138.6	14091.3	0.636506	0.107043
Oxaloacetate decarboxylase (EC 4.1.1.112)	tr|A0A318THC9|A0A318THC9_9BRAD	A0A318THC9	Rhodopseudomonas faecalis	0.955	0.783159	3634.64	3048.92	0.838852	0.100824
Uncharacterized protein DUF3597_x000D_ Uncharacterized protein DUF3597	tr|A0A318TJ91|A0A318TJ91_9BRAD / tr|A0A336JH08|A0A336JH08_9BRAD	A0A318TJ91 / A0A336JH08	Rhodopseudomonas faecalis / Rhodopseudomonas pentothenatexigens	3.7281	0.00144088	25499.6	83764.1	3.28492	3.11351e-05
Histidinol dehydrogenase (HDH) (EC 1.1.1.23)	tr|A0A318TK07|A0A318TK07_9BRAD	A0A318TK07	Rhodopseudomonas faecalis	0.9853	0.942654	14340.8	12549.8	0.875112	0.00589719
Signal peptide protein	tr|A0A318TFI7|A0A318TFI7_9BRAD	A0A318TFI7	Rhodopseudomonas faecalis	1.4026	0.458419	1697.82	2309.47	1.36026	0.402136
von Willebrand factor type A domain-containing protein	tr|A0A318TMR8|A0A318TMR8_9BRAD	A0A318TMR8	Rhodopseudomonas faecalis	1.7145	0.18787	39134.6	55680.1	1.42279	0.115816
G3E family GTPase	tr|A0A318TTM6|A0A318TTM6_9BRAD	A0A318TTM6	Rhodopseudomonas faecalis	0.8883	0.53697	10191.4	7951.72	0.78024	0.00243729
Uncharacterized protein DUF3775	tr|A0A318TP56|A0A318TP56_9BRAD	A0A318TP56	Rhodopseudomonas faecalis	4.8158	0.00761107	4189.25	9094.59	2.17093	0.00055626
Bifunctional purine biosynthesis protein PurH [Includes: Phosphoribosylaminoimidazolecarboxamide formyltransferase (EC 2.1.2.3) (AICAR transformylase); IMP cyclohydrolase (EC 3.5.4.10) (ATIC) (IMP synthase) (Inosinicase)]	tr|A0A318T8L9|A0A318T8L9_9BRAD	A0A318T8L9	Rhodopseudomonas faecalis	0.9598	0.851804	35304.2	30008.1	0.849988	0.0326283
1,4-alpha-glucan branching enzyme GlgB (EC 2.4.1.18) (1,4-alpha-D-glucan:1,4-alpha-D-glucan 6-glucosyl-transferase) (Alpha-(1->4)-glucan branching enzyme) (Glycogen branching enzyme) (BE)	tr|A0A318TQ18|A0A318TQ18_9BRAD	A0A318TQ18	Rhodopseudomonas faecalis	1.6868	0.0550379	5310.41	6777.59	1.27628	0.0112579
Cytochrome c556	tr|A0A318TA21|A0A318TA21_9BRAD	A0A318TA21	Rhodopseudomonas faecalis	1.2039	0.498967	13811	14712.1	1.06524	0.68712
DUF177 domain-containing protein	tr|A0A318TPI8|A0A318TPI8_9BRAD	A0A318TPI8	Rhodopseudomonas faecalis	1.1034	0.615536	6691.01	6543.84	0.978005	0.739714
CN hydrolase domain-containing protein	tr|A0A318TCH0|A0A318TCH0_9BRAD	A0A318TCH0	Rhodopseudomonas faecalis	1.0516	0.892826	7042.86	7107.8	1.00922	0.971909
Universal stress protein	tr|A0A318TQX2|A0A318TQX2_9BRAD	A0A318TQX2	Rhodopseudomonas faecalis	1.7561	0.00610419	5470.96	7901.78	1.44431	0.000129565
Signal peptide protein	tr|A0A318TKW4|A0A318TKW4_9BRAD	A0A318TKW4	Rhodopseudomonas faecalis	1.0344	0.907895	6082.12	5574.29	0.916504	0.592607
Beta-alanine--pyruvate transaminase	tr|A0A318TR99|A0A318TR99_9BRAD	A0A318TR99	Rhodopseudomonas faecalis	1.0085	0.973269	29288.1	27268.7	0.93105	0.634918
dCTP deaminase	tr|A0A318TB93|A0A318TB93_9BRAD	A0A318TB93	Rhodopseudomonas faecalis	0.9145	0.7331	4005.51	3219.02	0.803649	0.06029
Amino acid/amide ABC transporter ATP-binding protein 2 (HAAT family)	tr|A0A318TK69|A0A318TK69_9BRAD	A0A318TK69	Rhodopseudomonas faecalis	1.1983	0.359517	5790.97	6022.32	1.03995	0.660425
30S ribosomal protein S15	tr|A0A318TCE2|A0A318TCE2_9BRAD	A0A318TCE2	Rhodopseudomonas faecalis	0.8625	0.587903	121419	90750.2	0.747412	0.0876121
Uncharacterized small protein (DUF1192 family)	tr|A0A318TIB3|A0A318TIB3_9BRAD	A0A318TIB3	Rhodopseudomonas faecalis	1.9303	0.199687	45737.9	51097.3	1.11718	0.675034
Putative NADH-flavin reductase	tr|A0A318TI61|A0A318TI61_9BRAD	A0A318TI61	Rhodopseudomonas faecalis	0.9082	0.539393	4640	4911.28	1.05847	0.683664
Phospho-2-dehydro-3-deoxyheptonate aldolase (EC 2.5.1.54)	tr|A0A318TMI2|A0A318TMI2_9BRAD	A0A318TMI2	Rhodopseudomonas faecalis	0.8607	0.511596	7353.99	5692.75	0.774102	0.0142265
Transcriptional repressor NrdR	tr|A0A318TGI4|A0A318TGI4_9BRAD	A0A318TGI4	Rhodopseudomonas faecalis	0.9099	0.671591	4969.72	4009.63	0.806812	0.0272975
Cytochrome c domain-containing protein	tr|A0A318TFF6|A0A318TFF6_9BRAD	A0A318TFF6	Rhodopseudomonas faecalis	0.7038	0.533377	9177.05	5460.97	0.595068	0.292462
Arginine biosynthesis bifunctional protein ArgJ [Cleaved into: Arginine biosynthesis bifunctional protein ArgJ alpha chain; Arginine biosynthesis bifunctional protein ArgJ beta chain] [Includes: Glutamate N-acetyltransferase (EC 2.3.1.35) (Ornithine acetyltransferase) (OATase) (Ornithine transacetylase); Amino-acid acetyltransferase (EC 2.3.1.1) (N-acetylglutamate synthase) (AGSase)]	tr|A0A318T9X3|A0A318T9X3_9BRAD	A0A318T9X3	Rhodopseudomonas faecalis	0.9323	0.747176	12171.5	9876.16	0.811414	0.00100511
Uncharacterized protein (DUF1330 family)	tr|A0A318TNU8|A0A318TNU8_9BRAD	A0A318TNU8	Rhodopseudomonas faecalis	0.9604	0.916522	2015.63	2041.26	1.01272	0.934314
Zinc ribbon domain-containing protein	tr|A0A318TK80|A0A318TK80_9BRAD	A0A318TK80	Rhodopseudomonas faecalis	0.5528	0.173765	3196.15	1891.9	0.591931	0.0565587
NADH-quinone oxidoreductase subunit D (EC 7.1.1.-) (NADH dehydrogenase I subunit D) (NDH-1 subunit D)	tr|A0A318TUA2|A0A318TUA2_9BRAD	A0A318TUA2	Rhodopseudomonas faecalis	1.2056	0.660437	4638.44	4637.78	0.999859	0.999345
50S ribosomal protein L28	tr|A0A318T941|A0A318T941_9BRAD	A0A318T941	Rhodopseudomonas faecalis	0.6549	0.183523	64164.9	36659.9	0.571339	0.0156353
Indolepyruvate ferredoxin oxidoreductase	tr|A0A318TFG1|A0A318TFG1_9BRAD	A0A318TFG1	Rhodopseudomonas faecalis	1.713	0.107408	1150.81	1645.93	1.43024	0.0407937
4-hydroxy-tetrahydrodipicolinate synthase	tr|A0A318T7Z4|A0A318T7Z4_9BRAD	A0A318T7Z4	Rhodopseudomonas faecalis	0.6838	0.502632	2452.59	2229.01	0.908836	0.611104
Signal peptide protein	tr|A0A318THV3|A0A318THV3_9BRAD	A0A318THV3	Rhodopseudomonas faecalis	0.8072	0.563079	3666.23	2560.16	0.698307	0.213879
Myo-inositol-1(Or 4)-monophosphatase	tr|A0A318TCB1|A0A318TCB1_9BRAD	A0A318TCB1	Rhodopseudomonas faecalis	1.4039	0.0633196	9372.39	13054.2	1.39284	0.00761674
Cytochrome-dependent sulfide dehydrogenase (Flavoprotein)	tr|A0A318T9W3|A0A318T9W3_9BRAD	A0A318T9W3	Rhodopseudomonas faecalis	0.8579	0.761761	4010.79	3214.21	0.801391	0.0310637
CBS domain protein	tr|A0A318TCD5|A0A318TCD5_9BRAD	A0A318TCD5	Rhodopseudomonas faecalis	0.9875	0.940348	4705.41	3447.1	0.732581	0.241392
3-oxoacid CoA-transferase subunit A	tr|A0A318TD63|A0A318TD63_9BRAD	A0A318TD63	Rhodopseudomonas faecalis	1.1341	0.657532	13361.4	17331.9	1.29716	0.289003
Phosphoribosylamine--glycine ligase (EC 6.3.4.13) (GARS) (Glycinamide ribonucleotide synthetase) (Phosphoribosylglycinamide synthetase)	tr|A0A318TD30|A0A318TD30_9BRAD	A0A318TD30	Rhodopseudomonas faecalis	0.898	0.696832	3703.12	3085.22	0.833141	0.0878952
GTPase Der (GTP-binding protein EngA)	tr|A0A318TEN3|A0A318TEN3_9BRAD	A0A318TEN3	Rhodopseudomonas faecalis	1.0974	0.527027	5956.11	5842.2	0.980874	0.713806
Fe-S cluster assembly ATP-binding protein	tr|A0A318TIC8|A0A318TIC8_9BRAD	A0A318TIC8	Rhodopseudomonas faecalis	0.8359	0.344495	10088.4	7455.76	0.739044	0.0331259
4-hydroxy-3-methylbut-2-enyl diphosphate reductase (HMBPP reductase) (EC 1.17.7.4)	tr|A0A318TA54|A0A318TA54_9BRAD	A0A318TA54	Rhodopseudomonas faecalis	0.6912	0.125027	16100.2	9312.58	0.578415	0.00507743
4-hydroxy-tetrahydrodipicolinate reductase (HTPA reductase) (EC 1.17.1.8)	tr|A0A318TJU8|A0A318TJU8_9BRAD	A0A318TJU8	Rhodopseudomonas faecalis	1.0418	0.837854	15317.2	14205.4	0.927416	0.0348546
RimJ/RimL family protein N-acetyltransferase	tr|A0A318TMV2|A0A318TMV2_9BRAD	A0A318TMV2	Rhodopseudomonas faecalis	1.2328	0.368912	5647.42	6206.51	1.099	0.220552
ATP phosphoribosyltransferase (ATP-PRT) (ATP-PRTase) (EC 2.4.2.17)	tr|A0A318TN57|A0A318TN57_9BRAD	A0A318TN57	Rhodopseudomonas faecalis	1.2309	0.0718223	12150.3	10968.7	0.90275	0.233747
Glyceraldehyde-3-phosphate dehydrogenase (NAD+)	tr|A0A318TGE8|A0A318TGE8_9BRAD	A0A318TGE8	Rhodopseudomonas faecalis	1.6491	0.0376878	136887	201362	1.47102	0.000855558
Putative monooxygenase ydhR	tr|A0A318TAU7|A0A318TAU7_9BRAD	A0A318TAU7	Rhodopseudomonas faecalis	1.0459	0.872044	10775.8	10361.5	0.961556	0.874982
S41A family C-terminal processing peptidase-3	tr|A0A318T815|A0A318T815_9BRAD	A0A318T815	Rhodopseudomonas faecalis	0.5848	0.087182	21005	11235.8	0.53491	0.000460509
LTXXQ motif family protein	tr|A0A318TTT4|A0A318TTT4_9BRAD	A0A318TTT4	Rhodopseudomonas faecalis	44.1041	5.11805e-06	6354.83	227458	35.7929	0.00273914
Pimeloyl-ACP methyl ester carboxylesterase	tr|A0A318T801|A0A318T801_9BRAD	A0A318T801	Rhodopseudomonas faecalis	1.6882	0.0413864	10194.5	15335	1.50425	0.00423073
Beta-ketoacyl-[acyl-carrier-protein] synthase III (Beta-ketoacyl-ACP synthase III) (KAS III) (EC 2.3.1.180) (3-oxoacyl-[acyl-carrier-protein] synthase 3) (3-oxoacyl-[acyl-carrier-protein] synthase III)	tr|A0A318TIW3|A0A318TIW3_9BRAD	A0A318TIW3	Rhodopseudomonas faecalis	1.0136	0.950663	23985.6	21553.7	0.898609	0.106525
GreA/GreB family elongation factor	tr|A0A318TE33|A0A318TE33_9BRAD	A0A318TE33	Rhodopseudomonas faecalis	1.8582	0.0261675	22455.9	36890.6	1.6428	0.000401037
Transcriptional regulator	tr|A0A318TB31|A0A318TB31_9BRAD	A0A318TB31	Rhodopseudomonas faecalis	1.178	0.451444	7047.88	7403.22	1.05042	0.629432
Holo-[acyl-carrier-protein] synthase (Holo-ACP synthase) (EC 2.7.8.7) (4'-phosphopantetheinyl transferase AcpS)	tr|A0A318TGZ9|A0A318TGZ9_9BRAD	A0A318TGZ9	Rhodopseudomonas faecalis	1.0856	0.68085	3113.32	3074.79	0.987625	0.924465
Polyhydroxyalkanoate synthesis repressor PhaR	tr|A0A318T8W5|A0A318T8W5_9BRAD	A0A318T8W5	Rhodopseudomonas faecalis	1.4047	0.218333	25730.3	32243.5	1.25313	0.0959527
TetR family transcriptional regulator	tr|A0A318TKV1|A0A318TKV1_9BRAD	A0A318TKV1	Rhodopseudomonas faecalis	4.7128	0.0222843	12228.5	35565.9	2.90844	0.00324758
Phenylalanine--tRNA ligase beta subunit (EC 6.1.1.20) (Phenylalanyl-tRNA synthetase beta subunit) (PheRS)	tr|A0A318TAG2|A0A318TAG2_9BRAD	A0A318TAG2	Rhodopseudomonas faecalis	0.9412	0.785356	17160.5	14260.8	0.831025	0.00844725
Molybdopterin-binding protein	tr|A0A318THH2|A0A318THH2_9BRAD	A0A318THH2	Rhodopseudomonas faecalis	1.0529	0.882805	4286.56	4157.96	0.969997	0.893775
Acetyl-CoA synthetase	tr|A0A318TDM3|A0A318TDM3_9BRAD	A0A318TDM3	Rhodopseudomonas faecalis	1.0391	0.869573	6125.41	5585.2	0.911808	0.347226
Zinc/manganese transport system substrate-binding protein	tr|A0A318TIR5|A0A318TIR5_9BRAD	A0A318TIR5	Rhodopseudomonas faecalis	0.8559	0.633898	4154.74	3852.88	0.927347	0.589266
TAXi_C domain-containing protein	tr|A0A318TSW4|A0A318TSW4_9BRAD	A0A318TSW4	Rhodopseudomonas faecalis	1.5815	0.429717	38267.9	62966	1.6454	0.287291
N-ethylmaleimide reductase	tr|A0A318TB05|A0A318TB05_9BRAD	A0A318TB05	Rhodopseudomonas faecalis	1.6529	0.0133078	17489.2	25989.9	1.48605	0.00845088
Sugar O-acyltransferase (Sialic acid O-acetyltransferase NeuD family)	tr|A0A318T979|A0A318T979_9BRAD	A0A318T979	Rhodopseudomonas faecalis	1.7642	0.0960246	3147.56	4761.48	1.51275	0.0215206
NAD(P)-dependent dehydrogenase (Short-subunit alcohol dehydrogenase family)	tr|A0A318TQL9|A0A318TQL9_9BRAD	A0A318TQL9	Rhodopseudomonas faecalis	1.4434	0.057502	7708.04	15966.1	2.07135	0.309598
Putative cold-shock DNA-binding protein	tr|A0A318TAX3|A0A318TAX3_9BRAD	A0A318TAX3	Rhodopseudomonas faecalis	2.0409	0.00129468	236908	421559	1.77942	0.000308254
Uncharacterized protein (TIGR02284 family)	tr|A0A318TDT0|A0A318TDT0_9BRAD	A0A318TDT0	Rhodopseudomonas faecalis	10.9086	0.00012358	20280.2	198599	9.79273	0.00234176
Two component Fis family sigma54 specific transcriptional regulator	tr|A0A318TAU2|A0A318TAU2_9BRAD	A0A318TAU2	Rhodopseudomonas faecalis	1.1814	0.462349	8307.49	8934.68	1.0755	0.275551
Lipoyl synthase (EC 2.8.1.8) (Lip-syn) (LS) (Lipoate synthase) (Lipoic acid synthase) (Sulfur insertion protein LipA)	tr|A0A318TJ24|A0A318TJ24_9BRAD	A0A318TJ24	Rhodopseudomonas faecalis	0.3262	0.0140646	2773.01	1229.17	0.443264	0.0964953
Molybdenum cofactor synthesis domain-containing protein	tr|A0A318TN74|A0A318TN74_9BRAD	A0A318TN74	Rhodopseudomonas faecalis	1.4622	0.0917385	9606.49	13546.3	1.41012	0.00554449
Copper chaperone PCu(A)C	tr|A0A318TKQ5|A0A318TKQ5_9BRAD	A0A318TKQ5	Rhodopseudomonas faecalis	1.1537	0.622367	10697.3	10966.4	1.02516	0.846686
Transcriptional regulator PpsR	tr|A0A318TLP0|A0A318TLP0_9BRAD	A0A318TLP0	Rhodopseudomonas faecalis	1.466	0.05436	5195.49	6216.28	1.19648	0.0798627
tRNA (guanine-N(7)-)-methyltransferase (EC 2.1.1.33) (tRNA (guanine(46)-N(7))-methyltransferase) (tRNA(m7G46)-methyltransferase)	tr|A0A318TCC2|A0A318TCC2_9BRAD	A0A318TCC2	Rhodopseudomonas faecalis	1.0584	0.794899	4745.87	4445.27	0.936659	0.333923
Putative pyrophosphorylase ModD	tr|A0A318TJM8|A0A318TJM8_9BRAD	A0A318TJM8	Rhodopseudomonas faecalis	1.032	0.924023	6489.14	7351.61	1.13291	0.703383
FlaG protein	tr|A0A318TQW5|A0A318TQW5_9BRAD	A0A318TQW5	Rhodopseudomonas faecalis	0.9824	0.936918	9377.39	8173.68	0.871636	0.299107
Malate synthase G (EC 2.3.3.9)	tr|A0A318TAB1|A0A318TAB1_9BRAD	A0A318TAB1	Rhodopseudomonas faecalis	0.8048	0.34757	36735.7	26817.2	0.730005	0.0216125
Electron transfer flavoprotein beta subunit	tr|A0A318TGZ8|A0A318TGZ8_9BRAD	A0A318TGZ8	Rhodopseudomonas faecalis	1.6964	0.0513568	100989	151825	1.50338	0.003241
Xanthine dehydrogenase molybdenum binding subunit apoprotein	tr|A0A318T6U8|A0A318T6U8_9BRAD	A0A318T6U8	Rhodopseudomonas faecalis	1.1972	0.470356	5619.52	6152.83	1.0949	0.331398
3-oxoadipate enol-lactonase	tr|A0A318TJB1|A0A318TJB1_9BRAD	A0A318TJB1	Rhodopseudomonas faecalis	1.1174	0.556589	6126.68	6142.39	1.00257	0.962666
Tripartite ATP-independent transporter DctP family solute receptor	tr|A0A318TGV5|A0A318TGV5_9BRAD	A0A318TGV5	Rhodopseudomonas faecalis	1.0084	0.963347	11172.9	8758	0.783864	0.0896081
Blue-light-activated histidine kinase	tr|A0A318TEM4|A0A318TEM4_9BRAD	A0A318TEM4	Rhodopseudomonas faecalis	1.0369	0.954325	2285.46	2140.61	0.936624	0.769723
Methylmalonyl-CoA epimerase /ethylmalonyl-CoA epimerase	tr|A0A318U0L4|A0A318U0L4_9BRAD	A0A318U0L4	Rhodopseudomonas faecalis	0.9344	0.849445	5813.4	5305.45	0.912624	0.736589
ATP-dependent zinc metalloprotease FtsH (EC 3.4.24.-)	tr|A0A318TIL2|A0A318TIL2_9BRAD	A0A318TIL2	Rhodopseudomonas faecalis	1.3846	0.283263	10361.5	12254	1.18265	0.230703
tRNA-Thr(GGU) m(6)t(6)A37 methyltransferase TsaA	tr|A0A318TFJ7|A0A318TFJ7_9BRAD	A0A318TFJ7	Rhodopseudomonas faecalis	0.88	0.591787	6507.47	6019.71	0.925046	0.502614
Co-chaperonin GroES (10 kDa chaperonin) (Chaperonin-10) (Cpn10)	tr|A0A318TRD0|A0A318TRD0_9BRAD	A0A318TRD0	Rhodopseudomonas faecalis	0.8613	0.639476	254382	190060	0.747142	0.212869
Aspartyl/glutamyl-tRNA(Asn/Gln) amidotransferase subunit C (Asp/Glu-ADT subunit C) (EC 6.3.5.-)	tr|A0A318TJP1|A0A318TJP1_9BRAD	A0A318TJP1	Rhodopseudomonas faecalis	0.9225	0.841196	9332.83	6533.58	0.700064	0.297731
3-isopropylmalate dehydratase small subunit (EC 4.2.1.33) (Alpha-IPM isomerase) (IPMI) (Isopropylmalate isomerase)	tr|A0A318TE73|A0A318TE73_9BRAD	A0A318TE73	Rhodopseudomonas faecalis	0.911	0.721537	30987.8	25043.3	0.808168	0.0555152
Acyl-CoA synthetase (AMP-forming)/AMP-acid ligase II	tr|A0A318TDC2|A0A318TDC2_9BRAD	A0A318TDC2	Rhodopseudomonas faecalis	1.4314	0.0876251	8002.17	10171.3	1.27107	0.00850966
Methylenetetrahydrofolate reductase (EC 1.5.1.20)	tr|A0A318TAZ7|A0A318TAZ7_9BRAD	A0A318TAZ7	Rhodopseudomonas faecalis	0.9919	0.969647	20070.4	17829.7	0.888359	0.475723
Localization factor PodJL	tr|A0A318TY36|A0A318TY36_9BRAD	A0A318TY36	Rhodopseudomonas faecalis	0.8674	0.510362	4059.76	3035.37	0.747671	0.0534518
CreA protein	tr|A0A318TND8|A0A318TND8_9BRAD	A0A318TND8	Rhodopseudomonas faecalis	1.2904	0.192754	25747.8	29665.5	1.15215	0.052816
UPF0753 protein	tr|A0A318TKS6|A0A318TKS6_9BRAD	A0A318TKS6	Rhodopseudomonas faecalis	1.446	0.1291	2620.35	3259.81	1.24404	0.103635
Imidazole glycerol phosphate synthase subunit HisH (EC 4.3.2.10) (IGP synthase glutaminase subunit) (EC 3.5.1.2) (IGP synthase subunit HisH) (ImGP synthase subunit HisH) (IGPS subunit HisH)	tr|A0A318T7U9|A0A318T7U9_9BRAD	A0A318T7U9	Rhodopseudomonas faecalis	0.7945	0.469719	6086.53	5151.38	0.846358	0.286744
3-hydroxydecanoyl-[acyl-carrier-protein] dehydratase (EC 4.2.1.59) (3-hydroxyacyl-[acyl-carrier-protein] dehydratase FabA) (Beta-hydroxydecanoyl thioester dehydrase) (Trans-2-decenoyl-[acyl-carrier-protein] isomerase) (EC 5.3.3.14)	tr|A0A318T822|A0A318T822_9BRAD	A0A318T822	Rhodopseudomonas faecalis	1.0762	0.775865	26324.4	24827.9	0.943152	0.630137
Ubiquinone biosynthesis O-methyltransferase (2-polyprenyl-6-hydroxyphenol methylase) (EC 2.1.1.222) (3-demethylubiquinone 3-O-methyltransferase) (EC 2.1.1.64)	tr|A0A318TA75|A0A318TA75_9BRAD	A0A318TA75	Rhodopseudomonas faecalis	1.1594	0.344394	11914.3	12078.7	1.01379	0.908898
Phosphatidylethanolamine N-methyltransferase /phosphatidyl-N-methylethanolamine N-methyltransferase	tr|A0A318THN9|A0A318THN9_9BRAD	A0A318THN9	Rhodopseudomonas faecalis	0.7195	0.115507	8652.64	5593.42	0.646441	0.000283592
Papain like protease	tr|A0A318TI56|A0A318TI56_9BRAD	A0A318TI56	Rhodopseudomonas faecalis	1.9922	0.0441776	1985.41	3090.83	1.55677	0.0117595
BON domain-containing protein	tr|A0A318TE01|A0A318TE01_9BRAD	A0A318TE01	Rhodopseudomonas faecalis	1.344	0.182879	5650.14	7080.04	1.25307	0.0116228
Superoxide dismutase [Cu-Zn] (EC 1.15.1.1)	tr|A0A318TC98|A0A318TC98_9BRAD	A0A318TC98	Rhodopseudomonas faecalis	1.4938	0.320175	1412.33	2138.15	1.51392	0.0425245
3-oxoacyl-[acyl-carrier protein] reductase	tr|A0A318T932|A0A318T932_9BRAD	A0A318T932	Rhodopseudomonas faecalis	1.0763	0.706843	4790.82	4950.36	1.0333	0.814309
Amino acid/amide ABC transporter substrate-binding protein (HAAT family)	tr|A0A318T9V8|A0A318T9V8_9BRAD	A0A318T9V8	Rhodopseudomonas faecalis	1.0903	0.613618	4051.07	3824.59	0.944094	0.339404
DNA gyrase subunit A (EC 5.6.2.2)	tr|A0A318TDC4|A0A318TDC4_9BRAD	A0A318TDC4	Rhodopseudomonas faecalis	0.846	0.325065	7872.4	5677.24	0.721157	0.000177912
Sulfate transport system ATP-binding protein	tr|A0A318TCJ0|A0A318TCJ0_9BRAD	A0A318TCJ0	Rhodopseudomonas faecalis	0.9304	0.804579	20722.3	17466.3	0.842874	0.257373
Glutamyl-tRNA amidotransferase	tr|A0A318TKN1|A0A318TKN1_9BRAD	A0A318TKN1	Rhodopseudomonas faecalis	1.1075	0.683561	9945.24	9681.51	0.973482	0.837664
Formyl-CoA:oxalate CoA-transferase (FCOCT) (EC 2.8.3.16) (Formyl-coenzyme A transferase) (Formyl-CoA transferase)	tr|A0A318TM82|A0A318TM82_9BRAD	A0A318TM82	Rhodopseudomonas faecalis	2.4844	0.0026392	3578.62	7794.28	2.17801	9.46006e-05
DNA helicase (EC 3.6.4.12)	tr|A0A318TBJ4|A0A318TBJ4_9BRAD	A0A318TBJ4	Rhodopseudomonas faecalis	2.0646	0.04441	4091.09	4297.93	1.05056	0.900359
Pyridoxine 5'-phosphate synthase (PNP synthase) (EC 2.6.99.2)	tr|A0A318TFR2|A0A318TFR2_9BRAD	A0A318TFR2	Rhodopseudomonas faecalis	0.9327	0.804474	5235.37	4520.02	0.863362	0.43012
CTP synthase (EC 6.3.4.2) (Cytidine 5'-triphosphate synthase) (Cytidine triphosphate synthetase) (CTP synthetase) (CTPS) (UTP--ammonia ligase)	tr|A0A318TR46|A0A318TR46_9BRAD	A0A318TR46	Rhodopseudomonas faecalis	1.0566	0.773487	7223.49	7145.98	0.98927	0.818706
MoxR-like ATPase	tr|A0A318TZN9|A0A318TZN9_9BRAD	A0A318TZN9	Rhodopseudomonas faecalis	1.4606	0.12354	6804.5	9187.23	1.35017	0.00903802
ATP-dependent protease ATPase subunit HslU (Unfoldase HslU)	tr|A0A318TF39|A0A318TF39_9BRAD	A0A318TF39	Rhodopseudomonas faecalis	1.0981	0.669456	12709.8	18684	1.47004	0.0533178
Methylisocitrate lyase (EC 4.1.3.30)	tr|A0A318TLR3|A0A318TLR3_9BRAD	A0A318TLR3	Rhodopseudomonas faecalis	0.9823	0.923463	5667.21	4812.71	0.84922	0.377782
Putative polyhydroxyalkanoic acid system protein	tr|A0A318T9B0|A0A318T9B0_9BRAD	A0A318T9B0	Rhodopseudomonas faecalis	2.6175	0.000335824	4396.18	10131.4	2.30459	0.00179554
Lipoprotein-releasing system ATP-binding protein	tr|A0A318TLE4|A0A318TLE4_9BRAD	A0A318TLE4	Rhodopseudomonas faecalis	1.5122	0.294548	3518.83	3428.53	0.974339	0.83604
HK97 family phage major capsid protein	tr|A0A318TJX0|A0A318TJX0_9BRAD	A0A318TJX0	Rhodopseudomonas faecalis	1.0709	0.801031	14732.8	15695.3	1.06532	0.83756
Sel1 repeat family protein	tr|A0A318TEE0|A0A318TEE0_9BRAD	A0A318TEE0	Rhodopseudomonas faecalis	0.8238	0.472049	4858.26	3224.24	0.66366	0.0264973
Phage protein	tr|A0A318TLS1|A0A318TLS1_9BRAD	A0A318TLS1	Rhodopseudomonas faecalis	3.3728	0.0320107	94824.5	282068	2.97463	0.0729967
Phospholipid/cholesterol/gamma-HCH transport system ATP-binding protein	tr|A0A318T8T2|A0A318T8T2_9BRAD	A0A318T8T2	Rhodopseudomonas faecalis	0.8872	0.775492	5002.37	5157.28	1.03097	0.765344
Thioredoxin	tr|A0A318TBC4|A0A318TBC4_9BRAD	A0A318TBC4	Rhodopseudomonas faecalis	0.9592	0.84372	45507.8	38142.4	0.838151	0.296318
Uncharacterized protein (DUF2147 family)	tr|A0A318TFN4|A0A318TFN4_9BRAD	A0A318TFN4	Rhodopseudomonas faecalis	1.1372	0.604686	1871.48	1791.73	0.957385	0.698074
30S ribosomal protein S8	tr|A0A318T995|A0A318T995_9BRAD	A0A318T995	Rhodopseudomonas faecalis	0.9044	0.638756	134143	108060	0.805559	0.0214213
3-isopropylmalate dehydratase large subunit (EC 4.2.1.33) (Alpha-IPM isomerase) (IPMI) (Isopropylmalate isomerase)	tr|A0A318TC20|A0A318TC20_9BRAD	A0A318TC20	Rhodopseudomonas faecalis	0.9834	0.940646	24526.8	21241.2	0.866042	0.0988615
dTTP/UTP pyrophosphatase (dTTPase/UTPase) (EC 3.6.1.9) (Nucleoside triphosphate pyrophosphatase) (Nucleotide pyrophosphatase) (Nucleotide PPase)	tr|A0A318TQB9|A0A318TQB9_9BRAD	A0A318TQB9	Rhodopseudomonas faecalis	1.101	0.657427	6834.05	6002	0.87825	0.00313561
Short chain enoyl-CoA hydratase /3-hydroxyacyl-CoA dehydrogenase	tr|A0A318TH04|A0A318TH04_9BRAD	A0A318TH04	Rhodopseudomonas faecalis	1.3046	0.167473	9679.48	7070.3	0.730442	0.256274
Acetyl-CoA C-acetyltransferase	tr|A0A318TFH6|A0A318TFH6_9BRAD	A0A318TFH6	Rhodopseudomonas faecalis	1.3079	0.268184	4369.01	5668.84	1.29751	0.0582041
Homoserine O-acetyltransferase (HAT) (EC 2.3.1.31) (Homoserine transacetylase) (HTA)	tr|A0A318T778|A0A318T778_9BRAD	A0A318T778	Rhodopseudomonas faecalis	1.3565	0.346132	17346.6	20786	1.19827	0.32125
50S ribosomal protein L31	tr|A0A318TIS1|A0A318TIS1_9BRAD	A0A318TIS1	Rhodopseudomonas faecalis	0.79	0.397152	92212.2	65290.3	0.708044	0.0506919
Nucleotide-binding universal stress UspA family protein	tr|A0A318TR66|A0A318TR66_9BRAD	A0A318TR66	Rhodopseudomonas faecalis	2.1795	0.00975669	10024.7	18326.5	1.82813	0.000167242
Electron transfer flavoprotein alpha subunit apoprotein	tr|A0A318TH39|A0A318TH39_9BRAD	A0A318TH39	Rhodopseudomonas faecalis	0.7364	0.418708	2703.72	2752.25	1.01795	0.939481
Histidine triad (HIT) family protein	tr|A0A318TF55|A0A318TF55_9BRAD	A0A318TF55	Rhodopseudomonas faecalis	1.7449	0.0314528	15621.8	23857.9	1.52722	0.00577285
Cysteine desulfurase (EC 2.8.1.7)	tr|A0A318TK86|A0A318TK86_9BRAD	A0A318TK86	Rhodopseudomonas faecalis	1.0681	0.71898	11481.7	11178.1	0.97356	0.803062
3-phenylpropionate/trans-cinnamate dioxygenase ferredoxin reductase subunit	tr|A0A318TSJ7|A0A318TSJ7_9BRAD	A0A318TSJ7	Rhodopseudomonas faecalis	0.8353	0.475844	21714.9	15873.2	0.730981	0.0171159
Squalene-associated FAD-dependent desaturase	tr|A0A318TLX3|A0A318TLX3_9BRAD	A0A318TLX3	Rhodopseudomonas faecalis	1.0327	0.87977	5204.99	5078.44	0.975687	0.693922
Chromosome partitioning protein	tr|A0A318TC70|A0A318TC70_9BRAD	A0A318TC70	Rhodopseudomonas faecalis	0.8728	0.716716	5715.14	4991.45	0.873374	0.5601
Methyl-accepting chemotaxis protein	tr|A0A318T7L0|A0A318T7L0_9BRAD	A0A318T7L0	Rhodopseudomonas faecalis	0.4053	0.0384437	1207.26	572.253	0.474008	0.00194651
2-oxoglutarate ferredoxin oxidoreductase beta subunit	tr|A0A318TKM4|A0A318TKM4_9BRAD	A0A318TKM4	Rhodopseudomonas faecalis	0.8854	0.726562	9355.55	6745.09	0.720972	0.0644983
Tat pathway signal sequence domain protein	tr|A0A318TGP5|A0A318TGP5_9BRAD	A0A318TGP5	Rhodopseudomonas faecalis	1.1231	0.595101	15945.4	16034.6	1.0056	0.973994
DUF4384 domain-containing protein	tr|A0A318TNN7|A0A318TNN7_9BRAD	A0A318TNN7	Rhodopseudomonas faecalis	1.0853	0.723785	2712.22	2623.04	0.967121	0.819451
CRISPR-associated Csd1 family protein	tr|A0A318T9R4|A0A318T9R4_9BRAD	A0A318T9R4	Rhodopseudomonas faecalis	1.0462	0.80751	5014.71	4822.09	0.961588	0.701118
Transcription termination/antitermination protein NusG	tr|A0A318T9C6|A0A318T9C6_9BRAD	A0A318T9C6	Rhodopseudomonas faecalis	1.1129	0.592681	22765	22564.8	0.991205	0.858248
Serine hydroxymethyltransferase (SHMT) (Serine methylase) (EC 2.1.2.1)	tr|A0A318TPH9|A0A318TPH9_9BRAD	A0A318TPH9	Rhodopseudomonas faecalis	0.8048	0.361309	36109.1	26522.9	0.734521	0.0134501
GTPase HflX (GTP-binding protein HflX)	tr|A0A318TA40|A0A318TA40_9BRAD	A0A318TA40	Rhodopseudomonas faecalis	0.9678	0.891947	2853.51	2379.04	0.833727	0.192613
50S ribosomal protein L19	tr|A0A318TJT9|A0A318TJT9_9BRAD	A0A318TJT9	Rhodopseudomonas faecalis	0.739	0.266105	138915	89902.1	0.647176	0.00955697
DNA mismatch repair protein MutS	tr|A0A318TNV5|A0A318TNV5_9BRAD	A0A318TNV5	Rhodopseudomonas faecalis	0.8178	0.540789	4017.6	3583.92	0.892055	0.37291
Regulator of RNase E activity RraA	tr|A0A318TPF5|A0A318TPF5_9BRAD	A0A318TPF5	Rhodopseudomonas faecalis	1.1162	0.582299	10504.5	10518.3	1.00132	0.985045
UDP-N-acetyl-D-glucosamine dehydrogenase	tr|A0A318TCZ8|A0A318TCZ8_9BRAD	A0A318TCZ8	Rhodopseudomonas faecalis	0.9365	0.728524	5069.39	4427.37	0.873353	0.0647685
2-deoxy-D-gluconate 3-dehydrogenase	tr|A0A318TRT7|A0A318TRT7_9BRAD	A0A318TRT7	Rhodopseudomonas faecalis	1.3835	0.188433	6328.66	7122.89	1.1255	0.379212
Ribulose bisphosphate carboxylase small subunit (RuBisCO small subunit)	tr|A0A318TAX7|A0A318TAX7_9BRAD	A0A318TAX7	Rhodopseudomonas faecalis	1.7529	0.0676582	1.29039e+06	2.07994e+06	1.61187	0.0476891
Uncharacterized protein DUF992	tr|A0A318T8F9|A0A318T8F9_9BRAD	A0A318T8F9	Rhodopseudomonas faecalis	1.4303	0.253974	37130.9	47654.6	1.28342	0.194812
PAS/PAC sensor signal transduction histidine kinase	tr|A0A318THJ1|A0A318THJ1_9BRAD	A0A318THJ1	Rhodopseudomonas faecalis	0.8418	0.631971	3812.97	3184.35	0.835137	0.188766
Methionine--tRNA ligase (EC 6.1.1.10) (Methionyl-tRNA synthetase) (MetRS)	tr|A0A318TJ16|A0A318TJ16_9BRAD	A0A318TJ16	Rhodopseudomonas faecalis	0.9407	0.745099	8902.11	8213.26	0.922619	0.0467101
Signal peptide protein	tr|A0A318TIK8|A0A318TIK8_9BRAD	A0A318TIK8	Rhodopseudomonas faecalis	1.0134	0.949106	4546.84	4097.87	0.901257	0.21326
Rhodanese-related sulfurtransferase	tr|A0A318TDL6|A0A318TDL6_9BRAD	A0A318TDL6	Rhodopseudomonas faecalis	3.0102	0.0125861	18444.4	51103.6	2.77068	0.00702172
Peroxiredoxin Q/BCP	tr|A0A318TI21|A0A318TI21_9BRAD	A0A318TI21	Rhodopseudomonas faecalis	1.1986	0.354247	4378.39	5524.44	1.26175	0.097946
AsmA protein	tr|A0A318TFE0|A0A318TFE0_9BRAD	A0A318TFE0	Rhodopseudomonas faecalis	2.4577	0.00725533	5273.23	7263.88	1.3775	0.0890755
Lon protease (EC 3.4.21.53) (ATP-dependent protease La)	tr|A0A318TNG9|A0A318TNG9_9BRAD	A0A318TNG9	Rhodopseudomonas faecalis	1.1918	0.411178	20704.6	22003.2	1.06272	0.388038
Putrescine-binding periplasmic protein	tr|A0A318TMJ8|A0A318TMJ8_9BRAD	A0A318TMJ8	Rhodopseudomonas faecalis	1.3834	0.216295	17876.6	21351	1.19435	0.192025
Molybdenum cofactor biosynthesis protein B	tr|A0A318TJY3|A0A318TJY3_9BRAD	A0A318TJY3	Rhodopseudomonas faecalis	1.2373	0.471143	3805.36	3803.09	0.999405	0.997184
5'-nucleotidase SurE (EC 3.1.3.5) (Nucleoside 5'-monophosphate phosphohydrolase)	tr|A0A318TR73|A0A318TR73_9BRAD	A0A318TR73	Rhodopseudomonas faecalis	1.2849	0.262785	8183.51	9413.79	1.15034	0.0945886
Translation initiation factor IF-2	tr|A0A318T9T6|A0A318T9T6_9BRAD	A0A318T9T6	Rhodopseudomonas faecalis	0.8052	0.397346	22731.6	16274.5	0.715941	0.0174354
Ferrochelatase (EC 4.98.1.1) (Heme synthase) (Protoheme ferro-lyase)	tr|A0A318TDF7|A0A318TDF7_9BRAD	A0A318TDF7	Rhodopseudomonas faecalis	0.7136	0.113319	5452.62	4713.63	0.86447	0.108158
Holliday junction ATP-dependent DNA helicase RuvB (EC 3.6.4.12)	tr|A0A318TDB4|A0A318TDB4_9BRAD	A0A318TDB4	Rhodopseudomonas faecalis	1.3332	0.134578	3831.96	3684.04	0.9614	0.864897
Mg-protoporphyrin IX chelatase (EC 6.6.1.1)	tr|A0A318TI54|A0A318TI54_9BRAD	A0A318TI54	Rhodopseudomonas faecalis	0.9196	0.71321	36732.8	29894.4	0.813832	0.0166997
Short chain enoyl-CoA hydratase /3-hydroxyacyl-CoA dehydrogenase	tr|A0A318TI86|A0A318TI86_9BRAD	A0A318TI86	Rhodopseudomonas faecalis	1.5915	0.0759529	53202.3	74243.7	1.3955	0.00744213
RNA polymerase sigma factor	tr|A0A318TBK9|A0A318TBK9_9BRAD	A0A318TBK9	Rhodopseudomonas faecalis	4.1162	0.00375519	16675.9	58803	3.52623	0.00211036
Pantothenate synthetase (PS) (EC 6.3.2.1) (Pantoate--beta-alanine ligase) (Pantoate-activating enzyme)	tr|A0A318TEI7|A0A318TEI7_9BRAD	A0A318TEI7	Rhodopseudomonas faecalis	1.1258	0.653267	13349.2	11397.5	0.853793	0.213261
Glycine--tRNA ligase alpha subunit (EC 6.1.1.14) (Glycyl-tRNA synthetase alpha subunit) (GlyRS)	tr|A0A318TGU3|A0A318TGU3_9BRAD	A0A318TGU3	Rhodopseudomonas faecalis	0.8082	0.380213	6350.47	4614.16	0.726586	0.0285132
tRNA pseudouridine synthase B (EC 5.4.99.25) (tRNA pseudouridine(55) synthase) (Psi55 synthase) (tRNA pseudouridylate synthase) (tRNA-uridine isomerase)	tr|A0A318T9Z5|A0A318T9Z5_9BRAD	A0A318T9Z5	Rhodopseudomonas faecalis	0.512	0.00759907	22783.5	4270.44	0.187436	0.0151339
Methylmalonate-semialdehyde dehydrogenase [acylating]	tr|A0A318TNB8|A0A318TNB8_9BRAD	A0A318TNB8	Rhodopseudomonas faecalis	1.1948	0.445684	27824.4	29097.1	1.04574	0.664625
Phosphoenolpyruvate carboxylase (PEPC) (PEPCase) (EC 4.1.1.31)	tr|A0A318TYZ0|A0A318TYZ0_9BRAD	A0A318TYZ0	Rhodopseudomonas faecalis	2.114	0.047294	5821.68	10027.8	1.72249	0.00514954
6,7-dimethyl-8-ribityllumazine synthase (DMRL synthase) (LS) (Lumazine synthase) (EC 2.5.1.78)	tr|A0A318TVV1|A0A318TVV1_9BRAD	A0A318TVV1	Rhodopseudomonas faecalis	1.0595	0.72309	11224.3	10596.4	0.944053	0.509098
Sulfur compound chelating protein SoxZ	tr|A0A318TBF1|A0A318TBF1_9BRAD	A0A318TBF1	Rhodopseudomonas faecalis	3.1147	0.0559318	1120.44	2863.73	2.55589	0.0201781
S1-C subfamily serine protease	tr|A0A318TH98|A0A318TH98_9BRAD	A0A318TH98	Rhodopseudomonas faecalis	1.0292	0.895945	4226.82	4401.38	1.0413	0.768865
Phosphate acyltransferase (EC 2.3.1.274) (Acyl-ACP phosphotransacylase) (Acyl-[acyl-carrier-protein]--phosphate acyltransferase) (Phosphate-acyl-ACP acyltransferase)	tr|A0A318TGK0|A0A318TGK0_9BRAD	A0A318TGK0	Rhodopseudomonas faecalis	0.8216	0.405621	10808.4	9031.01	0.835558	0.0219736
Serine protease SohB	tr|A0A318THE4|A0A318THE4_9BRAD	A0A318THE4	Rhodopseudomonas faecalis	3.1707	0.00685284	2809.04	8313.6	2.95959	0.0439296
Lytic murein transglycosylase	tr|A0A318TKK6|A0A318TKK6_9BRAD	A0A318TKK6	Rhodopseudomonas faecalis	0.5019	0.246675	6648.55	4164.12	0.626321	0.0359072
50S ribosomal protein L20	tr|A0A318TR50|A0A318TR50_9BRAD	A0A318TR50	Rhodopseudomonas faecalis	0.6986	0.352796	115471	69222.1	0.599475	0.0663826
Farnesyl-diphosphate farnesyltransferase	tr|A0A318TJI0|A0A318TJI0_9BRAD	A0A318TJI0	Rhodopseudomonas faecalis	0.9362	0.765065	5834.49	5070.27	0.869016	0.0655928
Shikimate kinase (SK) (EC 2.7.1.71)	tr|A0A318THE9|A0A318THE9_9BRAD	A0A318THE9	Rhodopseudomonas faecalis	0.9835	0.906492	3201.5	2775.06	0.866801	0.236637
Malate dehydrogenase (Oxaloacetate-decarboxylating)(NADP+)	tr|A0A318TFT7|A0A318TFT7_9BRAD	A0A318TFT7	Rhodopseudomonas faecalis	1.1114	0.538794	6845.59	7369.98	1.0766	0.426529
Hemerythrin-like domain-containing protein	tr|A0A318THF0|A0A318THF0_9BRAD	A0A318THF0	Rhodopseudomonas faecalis	0.8916	0.585209	22553.3	17974.3	0.79697	0.0119924
50S ribosomal protein L1	tr|A0A318TPU3|A0A318TPU3_9BRAD	A0A318TPU3	Rhodopseudomonas faecalis	0.6622	0.266677	106971	62225.5	0.581705	0.0400241
Phosphomethylpyrimidine synthase (EC 4.1.99.17) (Hydroxymethylpyrimidine phosphate synthase) (HMP-P synthase) (HMP-phosphate synthase) (HMPP synthase) (Thiamine biosynthesis protein ThiC)	tr|A0A318T820|A0A318T820_9BRAD	A0A318T820	Rhodopseudomonas faecalis	0.3874	0.00876733	8300.48	3233.42	0.389546	0.00155239
Uncharacterized protein DUF2848	tr|A0A318TJ09|A0A318TJ09_9BRAD	A0A318TJ09	Rhodopseudomonas faecalis	0.9501	0.834194	39340.4	33151.8	0.842691	0.0931885
2-methylcitrate dehydratase PrpD	tr|A0A318T996|A0A318T996_9BRAD	A0A318T996	Rhodopseudomonas faecalis	0.9309	0.702849	8082.98	6896.29	0.853187	0.0481234
Alanine racemase (EC 5.1.1.1)	tr|A0A318THU5|A0A318THU5_9BRAD	A0A318THU5	Rhodopseudomonas faecalis	0.8638	0.630349	7533.75	6236.91	0.827863	0.156075
3,4-dihydroxy-2-butanone 4-phosphate synthase (EC 4.1.99.12)	tr|A0A318TWP3|A0A318TWP3_9BRAD	A0A318TWP3	Rhodopseudomonas faecalis	0.6595	0.252883	14847.4	13405.2	0.902868	0.57001
Cysteine rich repeat protein	tr|A0A318TK06|A0A318TK06_9BRAD	A0A318TK06	Rhodopseudomonas faecalis	2.3713	0.0313217	32019	63937	1.99684	0.00669478
Alpha-methylacyl-CoA racemase	tr|A0A318TI57|A0A318TI57_9BRAD	A0A318TI57	Rhodopseudomonas faecalis	1.2886	0.677523	2354.17	2963.1	1.25866	0.173503
Nitro_FeMo-Co domain-containing protein	tr|A0A318TUN5|A0A318TUN5_9BRAD	A0A318TUN5	Rhodopseudomonas faecalis	5.8067	0.0202528	3896.09	8244.88	2.11619	0.0307319
Peptide deformylase (PDF) (EC 3.5.1.88) (Polypeptide deformylase)	tr|A0A318TL81|A0A318TL81_9BRAD	A0A318TL81	Rhodopseudomonas faecalis	1.2935	0.404955	15097.5	16995.2	1.1257	0.447292
Protein HflC	tr|A0A318T9N4|A0A318T9N4_9BRAD	A0A318T9N4	Rhodopseudomonas faecalis	1.7577	0.143914	11513.1	17235.6	1.49704	0.0766614
ATP-dependent RNA helicase SUPV3L1/SUV3	tr|A0A318T7X4|A0A318T7X4_9BRAD	A0A318T7X4	Rhodopseudomonas faecalis	1.0558	0.803768	20463.4	19102.8	0.933512	0.272395
Adenosylhomocysteinase (EC 3.3.1.1) (S-adenosyl-L-homocysteine hydrolase) (AdoHcyase)	tr|A0A318T8E0|A0A318T8E0_9BRAD	A0A318T8E0	Rhodopseudomonas faecalis	0.9821	0.946222	72362.3	62350.6	0.861646	0.199793
ATP-dependent Clp protease ATP-binding subunit ClpX	tr|A0A318TKZ0|A0A318TKZ0_9BRAD	A0A318TKZ0	Rhodopseudomonas faecalis	0.8605	0.523435	19865.8	15634.2	0.78699	0.0121403
4-hydroxy-3-methylbut-2-enyl diphosphate reductase (HMBPP reductase) (EC 1.17.7.4)	tr|A0A318TLX8|A0A318TLX8_9BRAD	A0A318TLX8	Rhodopseudomonas faecalis	0.9172	0.670979	8746.52	6724.37	0.768806	0.0129679
Peptide methionine sulfoxide reductase MsrB (EC 1.8.4.12) (Peptide-methionine (R)-S-oxide reductase)	tr|A0A318TD82|A0A318TD82_9BRAD	A0A318TD82	Rhodopseudomonas faecalis	2.5846	0.0139246	7778.02	17074.1	2.19517	0.00791868
Replicative DNA helicase (EC 3.6.4.12)	tr|A0A318TEH6|A0A318TEH6_9BRAD	A0A318TEH6	Rhodopseudomonas faecalis	0.3537	0.00209796	3014.39	1205.83	0.400024	0.000388214
Succinate--CoA ligase [ADP-forming] subunit beta (EC 6.2.1.5) (Succinyl-CoA synthetase subunit beta) (SCS-beta)	tr|A0A318TBR7|A0A318TBR7_9BRAD	A0A318TBR7	Rhodopseudomonas faecalis	0.9047	0.703121	69862	55727	0.797672	0.0821473
Transcription antitermination protein NusB (Antitermination factor NusB)	tr|A0A318TJ03|A0A318TJ03_9BRAD	A0A318TJ03	Rhodopseudomonas faecalis	0.8184	0.396184	11710	8672.21	0.740585	0.00948591
Light-independent protochlorophyllide reductase subunit B (DPOR subunit B) (LI-POR subunit B) (EC 1.3.7.7)	tr|A0A318TDT3|A0A318TDT3_9BRAD	A0A318TDT3	Rhodopseudomonas faecalis	0.9551	0.838066	16371.4	14080.7	0.860078	0.0494634
Biotin carboxyl carrier protein of acetyl-CoA carboxylase	tr|A0A318TFA0|A0A318TFA0_9BRAD	A0A318TFA0	Rhodopseudomonas faecalis	0.941	0.838269	36708.3	29839.3	0.812876	0.191718
Uncharacterized protein	tr|A0A318T9M7|A0A318T9M7_9BRAD	A0A318T9M7	Rhodopseudomonas faecalis	1.2426	0.252627	5235.07	5891.39	1.12537	0.259609
CRISPR-associated Csd2 family protein	tr|A0A318TC69|A0A318TC69_9BRAD	A0A318TC69	Rhodopseudomonas faecalis	1.1785	0.411302	5856.36	6127.33	1.04627	0.418318
HemY protein	tr|A0A318TFC6|A0A318TFC6_9BRAD	A0A318TFC6	Rhodopseudomonas faecalis	1.0249	0.901309	6770.4	6137.27	0.906487	0.0835433
Glycerophosphoryl diester phosphodiesterase	tr|A0A318TFB0|A0A318TFB0_9BRAD	A0A318TFB0	Rhodopseudomonas faecalis	1.3891	0.467015	3255.84	3586.44	1.10154	0.465553
50S ribosomal protein L14	tr|A0A318TIH5|A0A318TIH5_9BRAD	A0A318TIH5	Rhodopseudomonas faecalis	0.7414	0.23064	48254	31936.5	0.661841	0.00371711
3-oxoacyl-[acyl-carrier protein] reductase	tr|A0A318TET0|A0A318TET0_9BRAD	A0A318TET0	Rhodopseudomonas faecalis	1.7258	0.0724155	3749.48	5645.21	1.5056	0.00126294
Protoporphyrinogen oxidase	tr|A0A318TAA3|A0A318TAA3_9BRAD	A0A318TAA3	Rhodopseudomonas faecalis	0.2697	0.0117426	7097.01	2413.74	0.340107	0.00290532
Aspartate carbamoyltransferase (EC 2.1.3.2) (Aspartate transcarbamylase) (ATCase)	tr|A0A318TEF3|A0A318TEF3_9BRAD	A0A318TEF3	Rhodopseudomonas faecalis	0.919	0.668138	6849.15	5546.07	0.809745	0.000715554
UDP-2-acetamido-3-amino-2,3-dideoxy-glucuronate N-acetyltransferase	tr|A0A318TEV0|A0A318TEV0_9BRAD	A0A318TEV0	Rhodopseudomonas faecalis	0.5856	0.0118934	3643.83	2240.67	0.614923	0.0517614
Ornithine carbamoyltransferase (OTCase) (EC 2.1.3.3)	tr|A0A318T900|A0A318T900_9BRAD	A0A318T900	Rhodopseudomonas faecalis	0.7708	0.305129	11693.4	7934.17	0.678515	0.000518386
Bifunctional NAD(P)H-hydrate repair enzyme (Nicotinamide nucleotide repair protein) [Includes: ADP-dependent (S)-NAD(P)H-hydrate dehydratase (EC 4.2.1.136) (ADP-dependent NAD(P)HX dehydratase); NAD(P)H-hydrate epimerase (EC 5.1.99.6)]	tr|A0A318TKS9|A0A318TKS9_9BRAD	A0A318TKS9	Rhodopseudomonas faecalis	0.9085	0.698168	6754.24	5987.44	0.886472	0.174226
Succinate semialdehyde dehydrogenase	tr|A0A318TCC0|A0A318TCC0_9BRAD	A0A318TCC0	Rhodopseudomonas faecalis	1.6225	0.0427396	13341.6	19497.2	1.46139	0.00221053
3-deoxy-manno-octulosonate cytidylyltransferase (EC 2.7.7.38) (CMP-2-keto-3-deoxyoctulosonic acid synthase) (CKS) (CMP-KDO synthase)	tr|A0A318TAN1|A0A318TAN1_9BRAD	A0A318TAN1	Rhodopseudomonas faecalis	1.114	0.57125	3274.72	3208.5	0.97978	0.747184
Crotonobetainyl-CoA:carnitine CoA-transferase CaiB-like acyl-CoA transferase	tr|A0A318T8G6|A0A318T8G6_9BRAD	A0A318T8G6	Rhodopseudomonas faecalis	0.8344	0.471475	14399.8	10655.8	0.739998	0.00715283
Protein-L-isoaspartate O-methyltransferase (L-isoaspartyl protein carboxyl methyltransferase) (Protein L-isoaspartyl methyltransferase) (Protein-beta-aspartate methyltransferase)	tr|A0A318TNZ7|A0A318TNZ7_9BRAD	A0A318TNZ7	Rhodopseudomonas faecalis	0.9863	0.941693	5141.17	4526.18	0.880378	0.0320354
Glycerol-3-phosphate dehydrogenase [NAD(P)+] (EC 1.1.1.94) (NAD(P)H-dependent glycerol-3-phosphate dehydrogenase)	tr|A0A318T9T3|A0A318T9T3_9BRAD	A0A318T9T3	Rhodopseudomonas faecalis	1.0199	0.915937	7737.24	6608.78	0.854152	0.163396
Glutathione S-transferase	tr|A0A318TJK6|A0A318TJK6_9BRAD	A0A318TJK6	Rhodopseudomonas faecalis	1.2564	0.322678	6315.69	6430.41	1.01816	0.937408
Phosphoribulokinase (EC 2.7.1.19)	tr|A0A318TF95|A0A318TF95_9BRAD	A0A318TF95	Rhodopseudomonas faecalis	0.9149	0.654796	22312.6	18490.8	0.828713	0.0183767
NAD(P)-dependent dehydrogenase (Short-subunit alcohol dehydrogenase family)	tr|A0A318TDI6|A0A318TDI6_9BRAD	A0A318TDI6	Rhodopseudomonas faecalis	5.1694	0.00714595	45820.3	168671	3.68115	0.00048826
Amidohydrolase	tr|A0A318TSS8|A0A318TSS8_9BRAD	A0A318TSS8	Rhodopseudomonas faecalis	2.0915	0.0251919	14000.1	25638.9	1.83133	0.00880632
Sulfide dehydrogenase (Flavoprotein) subunit SudA /sulfide dehydrogenase (Flavoprotein) subunit SudB	tr|A0A318TL25|A0A318TL25_9BRAD	A0A318TL25	Rhodopseudomonas faecalis	0.7344	0.345013	38950	25852.1	0.663725	0.0313037
NitT/TauT family transport system substrate-binding protein	tr|A0A318TFG5|A0A318TFG5_9BRAD	A0A318TFG5	Rhodopseudomonas faecalis	2.9344	0.0202235	4364.18	10363.3	2.37464	0.00332443
Transketolase (EC 2.2.1.1)	tr|A0A318TFE9|A0A318TFE9_9BRAD	A0A318TFE9	Rhodopseudomonas faecalis	0.8337	0.437002	56554	41699	0.737331	0.00644878
Peptide methionine sulfoxide reductase MsrA (Protein-methionine-S-oxide reductase) (EC 1.8.4.11) (Peptide-methionine (S)-S-oxide reductase) (Peptide Met(O) reductase)	tr|A0A318TB76|A0A318TB76_9BRAD	A0A318TB76	Rhodopseudomonas faecalis	1.1513	0.577045	4936.6	4861.02	0.984691	0.932253
Putative alpha-E superfamily protein	tr|A0A318TQL2|A0A318TQL2_9BRAD	A0A318TQL2	Rhodopseudomonas faecalis	2.0311	0.0150696	36417.8	59231.8	1.62645	0.559597
Ornithine--oxo-acid transaminase	tr|A0A318TJ28|A0A318TJ28_9BRAD	A0A318TJ28	Rhodopseudomonas faecalis	0.8666	0.592868	6425.42	4977.01	0.774582	0.0802437
Cytoplasmic protein	tr|A0A318TAL9|A0A318TAL9_9BRAD	A0A318TAL9	Rhodopseudomonas faecalis	1.1303	0.542805	56036.6	56294.3	1.0046	0.888186
Carbonic anhydrase (EC 4.2.1.1) (Carbonate dehydratase)	tr|A0A318TC94|A0A318TC94_9BRAD	A0A318TC94	Rhodopseudomonas faecalis	0.6533	0.258489	7876.62	7515.44	0.954145	0.753114
Nucleoid DNA-binding protein	tr|A0A318TE09|A0A318TE09_9BRAD	A0A318TE09	Rhodopseudomonas faecalis	1.1456	0.572793	162522	164729	1.01358	0.857782
Fructose-1,6-bisphosphatase class 1 (FBPase class 1) (EC 3.1.3.11) (D-fructose-1,6-bisphosphate 1-phosphohydrolase class 1)	tr|A0A318TGI6|A0A318TGI6_9BRAD	A0A318TGI6	Rhodopseudomonas faecalis	0.8341	0.432262	20596.5	15373.2	0.746398	0.0129595
Indolepyruvate oxidoreductase subunit IorA (IOR) (EC 1.2.7.8) (Indolepyruvate ferredoxin oxidoreductase subunit alpha)	tr|A0A318TI69|A0A318TI69_9BRAD	A0A318TI69	Rhodopseudomonas faecalis	0.5419	0.0327778	12894.7	7102.26	0.550791	0.00281943
Invasion associated locus B family protein	tr|A0A318TJ47|A0A318TJ47_9BRAD	A0A318TJ47	Rhodopseudomonas faecalis	0.8508	0.593816	9660.18	7555.91	0.78217	0.331145
50S ribosomal protein L13	tr|A0A318TJ08|A0A318TJ08_9BRAD	A0A318TJ08	Rhodopseudomonas faecalis	0.7813	0.39273	87971.7	60531.5	0.688079	0.0198323
Chaperonin GroEL (EC 5.6.1.7) (60 kDa chaperonin) (Chaperonin-60) (Cpn60)	tr|A0A318TQK2|A0A318TQK2_9BRAD	A0A318TQK2	Rhodopseudomonas faecalis	0.9237	0.709158	382978	317502	0.829035	0.142989
Aspartyl/glutamyl-tRNA(Asn/Gln) amidotransferase subunit B (Asp/Glu-ADT subunit B) (EC 6.3.5.-)	tr|A0A318TFM6|A0A318TFM6_9BRAD	A0A318TFM6	Rhodopseudomonas faecalis	1.0758	0.741428	7855.34	7952.03	1.01231	0.871283
DnaJ-class molecular chaperone	tr|A0A318TD17|A0A318TD17_9BRAD	A0A318TD17	Rhodopseudomonas faecalis	1.3768	0.11873	8873.79	10756	1.21211	0.254584
Trigger factor (TF) (EC 5.2.1.8) (PPIase)	tr|A0A318TLB3|A0A318TLB3_9BRAD	A0A318TLB3	Rhodopseudomonas faecalis	0.8734	0.653309	56187.3	42638.6	0.758865	0.113889
Ribosomal large subunit pseudouridine synthase C	tr|A0A318TFF9|A0A318TFF9_9BRAD	A0A318TFF9	Rhodopseudomonas faecalis	0.984	0.940963	5057.55	4514.49	0.892624	0.0734745
Phytoene dehydrogenase-like protein	tr|A0A318TN67|A0A318TN67_9BRAD	A0A318TN67	Rhodopseudomonas faecalis	1.5392	0.11127	1700.77	2405.09	1.41412	0.140147
Beta/gamma crystallin	tr|A0A318THH9|A0A318THH9_9BRAD	A0A318THH9	Rhodopseudomonas faecalis	2.2672	0.00401098	8447.19	16663.9	1.97272	0.000118903
Soluble lytic murein transglycosylase	tr|A0A318TFY8|A0A318TFY8_9BRAD	A0A318TFY8	Rhodopseudomonas faecalis	0.3946	0.0100513	3892.53	2343.11	0.601949	0.0546212
Phosphoglycerate kinase (EC 2.7.2.3)	tr|A0A318TE67|A0A318TE67_9BRAD	A0A318TE67	Rhodopseudomonas faecalis	1.4315	0.0967044	101419	128592	1.26793	0.0152865
Regulator of SigK (Sigma-K anti-sigma factor RskA)	tr|A0A318T865|A0A318T865_9BRAD	A0A318T865	Rhodopseudomonas faecalis	1.3473	0.259631	3776.69	4487.93	1.18832	0.101719
Acrylyl-CoA reductase (NADPH)	tr|A0A318TJU6|A0A318TJU6_9BRAD	A0A318TJU6	Rhodopseudomonas faecalis	1.43	0.167992	7250.6	9420.25	1.29924	0.108244
NTE family protein	tr|A0A318TSJ3|A0A318TSJ3_9BRAD	A0A318TSJ3	Rhodopseudomonas faecalis	1.4889	0.0675386	4737.36	6264.68	1.3224	0.00833688
Uncharacterized protein DUF4261	tr|A0A318TF42|A0A318TF42_9BRAD	A0A318TF42	Rhodopseudomonas faecalis	1.5793	0.389364	2585.83	1597.19	0.61767	0.261776
Fructose-bisphosphate aldolase (EC 4.1.2.13)	tr|A0A318TM48|A0A318TM48_9BRAD	A0A318TM48	Rhodopseudomonas faecalis	1.4185	0.0929626	5710.17	7227.64	1.26575	0.00161796
ParA family protein	tr|A0A318TWX7|A0A318TWX7_9BRAD	A0A318TWX7	Rhodopseudomonas faecalis	1.584	0.0839698	14837.4	21207.5	1.42933	0.0035381
Signal peptide protein	tr|A0A318T916|A0A318T916_9BRAD	A0A318T916	Rhodopseudomonas faecalis	1.5139	0.119027	34298.9	45583.6	1.32901	0.186587
30S ribosomal protein S13	tr|A0A318TAH9|A0A318TAH9_9BRAD	A0A318TAH9	Rhodopseudomonas faecalis	0.7926	0.44734	123497	85057.7	0.688743	0.0313243
Cobaltochelatase CobS subunit	tr|A0A318TD83|A0A318TD83_9BRAD	A0A318TD83	Rhodopseudomonas faecalis	1.5702	0.0656993	25988.2	36841.1	1.41761	0.0392686
Acetyl-coenzyme A carboxylase carboxyl transferase subunit beta (ACCase subunit beta) (Acetyl-CoA carboxylase carboxyltransferase subunit beta) (EC 2.1.3.15)	tr|A0A318TCC6|A0A318TCC6_9BRAD	A0A318TCC6	Rhodopseudomonas faecalis	0.887	0.540981	15523.7	12264.8	0.790069	0.00584954
Orotidine 5'-phosphate decarboxylase (EC 4.1.1.23) (OMP decarboxylase) (OMPDCase) (OMPdecase)	tr|A0A318TEC6|A0A318TEC6_9BRAD	A0A318TEC6	Rhodopseudomonas faecalis	0.8162	0.362322	7495.18	5432.57	0.724809	0.0133377
Acetyltransferase component of pyruvate dehydrogenase complex (EC 2.3.1.12)	tr|A0A318U0S2|A0A318U0S2_9BRAD	A0A318U0S2	Rhodopseudomonas faecalis	1.4249	0.130807	4205.65	5307.71	1.26204	0.0150312
Ferredoxin	tr|A0A318TJA9|A0A318TJA9_9BRAD	A0A318TJA9	Rhodopseudomonas faecalis	0.8397	0.599124	2374.63	2589.44	1.09046	0.5657
Extensin	tr|A0A318TCX5|A0A318TCX5_9BRAD	A0A318TCX5	Rhodopseudomonas faecalis	1.0515	0.815362	3414.86	3156.71	0.924404	0.382579
Uncharacterized protein DUF2147	tr|A0A318TA03|A0A318TA03_9BRAD	A0A318TA03	Rhodopseudomonas faecalis	0.8521	0.557749	19380.6	15504.3	0.79999	0.111829
50S ribosomal protein L2	tr|A0A318T909|A0A318T909_9BRAD	A0A318T909	Rhodopseudomonas faecalis	0.8105	0.466988	80248	57104.5	0.7116	0.0287404
Chaperone protein DnaJ	tr|A0A318TE80|A0A318TE80_9BRAD	A0A318TE80	Rhodopseudomonas faecalis	1.1888	0.369299	5292.41	5693.32	1.07575	0.464874
Phosphoribosyl-ATP pyrophosphatase (PRA-PH) (EC 3.6.1.31)	tr|A0A318T6Q4|A0A318T6Q4_9BRAD	A0A318T6Q4	Rhodopseudomonas faecalis	0.8593	0.51598	6715.4	5042.57	0.750897	0.040451
Electron transfer flavoprotein alpha subunit apoprotein	tr|A0A318T8U6|A0A318T8U6_9BRAD	A0A318T8U6	Rhodopseudomonas faecalis	1.5309	0.0423183	96496.4	131570	1.36347	0.00159545
NAD(P)-dependent dehydrogenase (Short-subunit alcohol dehydrogenase family)	tr|A0A318TBP3|A0A318TBP3_9BRAD	A0A318TBP3	Rhodopseudomonas faecalis	2.1548	0.024522	3526.17	5711.33	1.6197	0.0804819
NADPH-dependent 7-cyano-7-deazaguanine reductase (EC 1.7.1.13) (7-cyano-7-carbaguanine reductase) (NADPH-dependent nitrile oxidoreductase) (PreQ(0) reductase)	tr|A0A318TL15|A0A318TL15_9BRAD	A0A318TL15	Rhodopseudomonas faecalis	0.7922	0.569893	11752.9	9026.35	0.768012	0.214991
Sulfate transport system substrate-binding protein	tr|A0A318TCZ4|A0A318TCZ4_9BRAD	A0A318TCZ4	Rhodopseudomonas faecalis	1.7334	0.239836	155931	269995	1.7315	0.11355
Putative pyruvate, phosphate dikinase regulatory protein (PPDK regulatory protein) (EC 2.7.11.32) (EC 2.7.4.27)	tr|A0A318TS26|A0A318TS26_9BRAD	A0A318TS26	Rhodopseudomonas faecalis	0.8097	0.339209	3425.6	5310.48	1.55023	0.308994
50S ribosomal protein L21	tr|A0A318T9L8|A0A318T9L8_9BRAD	A0A318T9L8	Rhodopseudomonas faecalis	0.8294	0.504386	208227	150986	0.725103	0.0412013
Fumarate hydratase class I (EC 4.2.1.2)	tr|A0A318T8V3|A0A318T8V3_9BRAD	A0A318T8V3	Rhodopseudomonas faecalis	0.8953	0.58804	14519.7	11678.3	0.804307	0.0151745
Ribulose bisphosphate carboxylase small subunit (RuBisCO small subunit)	tr|A0A318TT22|A0A318TT22_9BRAD	A0A318TT22	Rhodopseudomonas faecalis	1.2407	0.52418	2489.96	2839.77	1.14049	0.45114
RTX toxin-activating lysine-acyltransferase (EC 2.3.1.-)	tr|A0A318TQ80|A0A318TQ80_9BRAD	A0A318TQ80	Rhodopseudomonas faecalis	0.283	0.0163894	4963.66	2617.75	0.527382	0.00550832
Enolase (EC 4.2.1.11) (2-phospho-D-glycerate hydro-lyase) (2-phosphoglycerate dehydratase)	tr|A0A318TM06|A0A318TM06_9BRAD	A0A318TM06	Rhodopseudomonas faecalis	1.0101	0.964803	39361.4	35491.6	0.901686	0.232288
Transcription termination factor Rho (EC 3.6.4.-) (ATP-dependent helicase Rho)	tr|A0A318TF29|A0A318TF29_9BRAD	A0A318TF29	Rhodopseudomonas faecalis	0.992	0.970153	20607.4	18158.6	0.881165	0.0346664
Dihydrolipoyl dehydrogenase (EC 1.8.1.4)	tr|A0A318TBQ9|A0A318TBQ9_9BRAD	A0A318TBQ9	Rhodopseudomonas faecalis	1.0931	0.718569	8463.02	8334.04	0.984759	0.873775
ATP synthase gamma chain (ATP synthase F1 sector gamma subunit) (F-ATPase gamma subunit)	tr|A0A318T966|A0A318T966_9BRAD	A0A318T966	Rhodopseudomonas faecalis	1.0626	0.754924	38517.7	36403.2	0.945103	0.328648
Putative proteasome-type protease	tr|A0A318TKP8|A0A318TKP8_9BRAD	A0A318TKP8	Rhodopseudomonas faecalis	0.9195	0.760553	14848.4	22406.9	1.50905	0.171415
ABC-type uncharacterized transport system substrate-binding protein	tr|A0A318TGU4|A0A318TGU4_9BRAD	A0A318TGU4	Rhodopseudomonas faecalis	0.9869	0.952755	3120.64	2816.74	0.902616	0.400945
SIMPL domain-containing protein	tr|A0A318TG77|A0A318TG77_9BRAD	A0A318TG77	Rhodopseudomonas faecalis	1.8533	0.0311159	9147.68	14630.8	1.5994	0.000854259
Fe-S cluster biogenesis protein NfuA	tr|A0A318TPC7|A0A318TPC7_9BRAD	A0A318TPC7	Rhodopseudomonas faecalis	0.9905	0.962841	14459.9	12724.3	0.87997	0.306489
1-deoxy-D-xylulose 5-phosphate reductoisomerase (DXP reductoisomerase) (EC 1.1.1.267) (1-deoxyxylulose-5-phosphate reductoisomerase) (2-C-methyl-D-erythritol 4-phosphate synthase)	tr|A0A318TUC7|A0A318TUC7_9BRAD	A0A318TUC7	Rhodopseudomonas faecalis	0.6779	0.142004	15078.8	12004.6	0.796126	0.0114906
Glutamate dehydrogenase	tr|A0A318TIG4|A0A318TIG4_9BRAD	A0A318TIG4	Rhodopseudomonas faecalis	0.8834	0.630985	47930.5	36632.3	0.76428	0.107307
Tryptophan synthase beta chain (EC 4.2.1.20)	tr|A0A318TCL0|A0A318TCL0_9BRAD	A0A318TCL0	Rhodopseudomonas faecalis	0.8148	0.390948	13080	10832.4	0.828165	0.188542
L-amino acid N-acyltransferase YncA	tr|A0A318TDR6|A0A318TDR6_9BRAD	A0A318TDR6	Rhodopseudomonas faecalis	0.7725	0.441829	6286.56	8022.98	1.27621	0.0586984
Chlorophyllide reductase iron protein subunit X	tr|A0A318TFZ6|A0A318TFZ6_9BRAD	A0A318TFZ6	Rhodopseudomonas faecalis	0.6125	0.0494688	34268.9	18891.3	0.551267	0.000902696
FkbM family methyltransferase	tr|A0A318TIL3|A0A318TIL3_9BRAD	A0A318TIL3	Rhodopseudomonas faecalis	0.8895	0.760603	2969.79	2486.46	0.837249	0.380534
WD-40 repeat-containing protein	tr|A0A318TGT0|A0A318TGT0_9BRAD	A0A318TGT0	Rhodopseudomonas faecalis	1.0731	0.647385	5546.08	5233.47	0.943633	0.644296
ATP-dependent protease subunit HslV (EC 3.4.25.2)	tr|A0A318TAK9|A0A318TAK9_9BRAD	A0A318TAK9	Rhodopseudomonas faecalis	1.5626	0.038437	8214.71	11535.6	1.40426	0.00808036
Phosphoribosylformylglycinamidine synthase subunit PurS (FGAM synthase) (EC 6.3.5.3) (Formylglycinamide ribonucleotide amidotransferase subunit III) (FGAR amidotransferase III) (FGAR-AT III) (Phosphoribosylformylglycinamidine synthase subunit III)	tr|A0A318T6N1|A0A318T6N1_9BRAD	A0A318T6N1	Rhodopseudomonas faecalis	1.0368	0.884866	33028.8	30449.8	0.921918	0.462832
Enoyl-CoA hydratase/carnithine racemase	tr|A0A318TPN1|A0A318TPN1_9BRAD	A0A318TPN1	Rhodopseudomonas faecalis	1.0911	0.589962	11097.7	10196.4	0.918784	0.438428
30S ribosomal protein S4	tr|A0A318TLN4|A0A318TLN4_9BRAD	A0A318TLN4	Rhodopseudomonas faecalis	0.8025	0.476739	88685.8	62274.9	0.702197	0.0701513
Lipolytic enzyme	tr|A0A318TBB6|A0A318TBB6_9BRAD	A0A318TBB6	Rhodopseudomonas faecalis	1.3169	0.123118	3497.62	4089.27	1.16916	0.286733
Phosphoribosyl-AMP cyclohydrolase (PRA-CH) (EC 3.5.4.19)	tr|A0A318TU11|A0A318TU11_9BRAD	A0A318TU11	Rhodopseudomonas faecalis	1.2377	0.327486	2141.85	2348.5	1.09648	0.446515
4-hydroxythreonine-4-phosphate dehydrogenase (EC 1.1.1.262) (4-(phosphohydroxy)-L-threonine dehydrogenase)	tr|A0A318TEJ5|A0A318TEJ5_9BRAD	A0A318TEJ5	Rhodopseudomonas faecalis	1.1452	0.429396	2177.5	2193.67	1.00743	0.950306
Cell division protein FtsZ	tr|A0A318T9R0|A0A318T9R0_9BRAD	A0A318T9R0	Rhodopseudomonas faecalis	1.3179	0.170959	8563.27	10121.5	1.18196	0.0586973
Uncharacterized protein	tr|A0A318TNR1|A0A318TNR1_9BRAD	A0A318TNR1	Rhodopseudomonas faecalis	1.0325	0.843909	2594.99	2386.76	0.919757	0.532573
Uncharacterized protein (DUF2147 family)	tr|A0A318TTZ6|A0A318TTZ6_9BRAD	A0A318TTZ6	Rhodopseudomonas faecalis	1.0044	0.983995	9269.38	8407.2	0.906986	0.357593
Peptidyl-tRNA hydrolase (PTH) (EC 3.1.1.29)	tr|A0A318TA97|A0A318TA97_9BRAD	A0A318TA97	Rhodopseudomonas faecalis	1.0391	0.861396	2656.94	2383.39	0.897043	0.11615
Phytoene desaturase	tr|A0A318TFY9|A0A318TFY9_9BRAD	A0A318TFY9	Rhodopseudomonas faecalis	0.9297	0.712747	33327.4	27618.1	0.828689	0.0105753
Enoyl-CoA hydratase/carnithine racemase	tr|A0A318THD2|A0A318THD2_9BRAD	A0A318THD2	Rhodopseudomonas faecalis	1.2401	0.256938	35094.8	38884.4	1.10798	0.0206798
Formyl-CoA transferase	tr|A0A318TCM0|A0A318TCM0_9BRAD	A0A318TCM0	Rhodopseudomonas faecalis	0.8419	0.524716	5089.56	3896.64	0.765613	0.0112962
Cytochrome c	tr|A0A318TD31|A0A318TD31_9BRAD	A0A318TD31	Rhodopseudomonas faecalis	0.4018	0.0670769	416016	170741	0.410419	0.00182991
Signal recognition particle receptor FtsY (SRP receptor)	tr|A0A318TC65|A0A318TC65_9BRAD	A0A318TC65	Rhodopseudomonas faecalis	1.2226	0.36139	15262.6	14207.6	0.930878	0.171449
8-amino-7-oxononanoate synthase	tr|A0A318TK66|A0A318TK66_9BRAD	A0A318TK66	Rhodopseudomonas faecalis	1.4952	0.0867038	7727.61	6806.31	0.880779	0.772191
SnoaL-like protein	tr|A0A318TQC9|A0A318TQC9_9BRAD	A0A318TQC9	Rhodopseudomonas faecalis	0.8221	0.632535	1826.63	2815.49	1.54135	0.48409
3-dehydroquinate synthase (DHQS) (EC 4.2.3.4)	tr|A0A318T9B7|A0A318T9B7_9BRAD	A0A318T9B7	Rhodopseudomonas faecalis	0.9462	0.71295	6854.82	5576.55	0.813523	0.235795
DUF1476 domain-containing protein	tr|A0A318T7Z9|A0A318T7Z9_9BRAD	A0A318T7Z9	Rhodopseudomonas faecalis	1.4778	0.0468812	67718	89014.5	1.31449	0.000212928
50S ribosomal protein L17	tr|A0A318TCQ3|A0A318TCQ3_9BRAD	A0A318TCQ3	Rhodopseudomonas faecalis	0.7041	0.271118	65265.1	40561.7	0.621491	0.0213943
Amino acid/amide ABC transporter substrate-binding protein (HAAT family)	tr|A0A318T8Z8|A0A318T8Z8_9BRAD	A0A318T8Z8	Rhodopseudomonas faecalis	1.2246	0.307194	6944.37	7222.45	1.04004	0.807323
Endolytic murein transglycosylase (EC 4.2.2.-) (Peptidoglycan polymerization terminase)	tr|A0A318TFF5|A0A318TFF5_9BRAD	A0A318TFF5	Rhodopseudomonas faecalis	0.3223	0.107181	3723.35	2015.52	0.54132	0.000262338
Acyl dehydratase	tr|A0A318TAE8|A0A318TAE8_9BRAD	A0A318TAE8	Rhodopseudomonas faecalis	1.6048	0.0654472	6554.89	9090.71	1.38686	0.0155669
Signal peptide protein	tr|A0A318TJK1|A0A318TJK1_9BRAD	A0A318TJK1	Rhodopseudomonas faecalis	0.3508	0.0937252	2054.84	728.628	0.354591	0.130727
SAM-dependent MidA family methyltransferase	tr|A0A318TCN2|A0A318TCN2_9BRAD	A0A318TCN2	Rhodopseudomonas faecalis	1.1178	0.677291	2213.17	2324.46	1.05029	0.764927
Mg-protoporphyrin IX chelatase (EC 6.6.1.1)	tr|A0A318TSX4|A0A318TSX4_9BRAD	A0A318TSX4	Rhodopseudomonas faecalis	0.9989	0.9955	11156.7	10196.7	0.913955	0.176416
Chaperone protein HtpG (Heat shock protein HtpG) (High temperature protein G)	tr|A0A318T840|A0A318T840_9BRAD	A0A318T840	Rhodopseudomonas faecalis	1.2418	0.41305	17140.1	17749.2	1.03554	0.797099
Glutamyl-tRNA(Gln) amidotransferase subunit A (Glu-ADT subunit A) (EC 6.3.5.7)	tr|A0A318THS6|A0A318THS6_9BRAD	A0A318THS6	Rhodopseudomonas faecalis	1.0392	0.831762	13221.3	12111	0.916024	0.268939
GTP pyrophosphokinase rsh ((p)ppGpp synthase) (ATP:GTP 3'-pyrophosphotransferase)	tr|A0A318TFT6|A0A318TFT6_9BRAD	A0A318TFT6	Rhodopseudomonas faecalis	1.3049	0.329754	5432.36	7071.71	1.30178	0.00291274
Imidazoleglycerol-phosphate dehydratase (IGPD) (EC 4.2.1.19)	tr|A0A318T7Y2|A0A318T7Y2_9BRAD	A0A318T7Y2	Rhodopseudomonas faecalis	1.0012	0.996061	9153.02	8201.94	0.896091	0.398799
30S ribosomal protein S6	tr|A0A318THV6|A0A318THV6_9BRAD	A0A318THV6	Rhodopseudomonas faecalis	1.0214	0.923303	63147.2	57655.8	0.913039	0.377578
ATP-dependent Clp protease proteolytic subunit (EC 3.4.21.92) (Endopeptidase Clp)	tr|A0A318TU92|A0A318TU92_9BRAD	A0A318TU92	Rhodopseudomonas faecalis	1.2606	0.413205	86255.6	106138	1.23051	0.338809
NitT/TauT family transport system ATP-binding protein	tr|A0A318TV88|A0A318TV88_9BRAD	A0A318TV88	Rhodopseudomonas faecalis	0.8476	0.572565	4612.8	3849.36	0.834496	0.12751
Sec translocon accessory complex subunit YajC	tr|A0A318TPS4|A0A318TPS4_9BRAD	A0A318TPS4	Rhodopseudomonas faecalis	1.0672	0.797507	4501.36	4301.62	0.955626	0.745232
CarD family transcriptional regulator	tr|A0A318TNQ7|A0A318TNQ7_9BRAD	A0A318TNQ7	Rhodopseudomonas faecalis	0.7816	0.361522	5281.15	3697.56	0.700144	0.0450186
Inosine-5'-monophosphate dehydrogenase (IMP dehydrogenase) (IMPD) (IMPDH) (EC 1.1.1.205)	tr|A0A318TUS8|A0A318TUS8_9BRAD	A0A318TUS8	Rhodopseudomonas faecalis	0.8964	0.622802	20506.8	16359.8	0.797778	0.0306388
Catalase-peroxidase (CP) (EC 1.11.1.21) (Peroxidase/catalase)	tr|A0A318THI8|A0A318THI8_9BRAD	A0A318THI8	Rhodopseudomonas faecalis	1.7845	0.0879817	11182.9	16919.9	1.51302	0.0305377
Uncharacterized protein YidB (DUF937 family)	tr|A0A318T7W7|A0A318T7W7_9BRAD	A0A318T7W7	Rhodopseudomonas faecalis	2.6598	0.13027	5702.92	11175.9	1.95968	0.061924
Short-chain dehydrogenase	tr|A0A318TBC2|A0A318TBC2_9BRAD	A0A318TBC2	Rhodopseudomonas faecalis	1.8384	0.208143	4052.11	4530.75	1.11812	0.3353
Electron transfer flavoprotein beta subunit	tr|A0A318TH26|A0A318TH26_9BRAD	A0A318TH26	Rhodopseudomonas faecalis	0.8282	0.470376	3857.99	3266.2	0.846607	0.345945
Isoleucine--tRNA ligase (EC 6.1.1.5) (Isoleucyl-tRNA synthetase) (IleRS)	tr|A0A318TWL5|A0A318TWL5_9BRAD	A0A318TWL5	Rhodopseudomonas faecalis	0.9741	0.896974	10350.3	9004.34	0.869963	0.0777308
Aspartate aminotransferase	tr|A0A318T765|A0A318T765_9BRAD	A0A318T765	Rhodopseudomonas faecalis	1.0046	0.986953	32864.7	30333.9	0.922993	0.493954
S-adenosylmethionine synthase (AdoMet synthase) (EC 2.5.1.6) (MAT) (Methionine adenosyltransferase)	tr|A0A318T8K1|A0A318T8K1_9BRAD	A0A318T8K1	Rhodopseudomonas faecalis	0.9	0.709551	132612	103501	0.780484	0.0703534
Acetyl-CoA synthetase	tr|A0A318TKH3|A0A318TKH3_9BRAD	A0A318TKH3	Rhodopseudomonas faecalis	1.0926	0.701979	7892.34	7768.92	0.984362	0.872466
Threonine--tRNA ligase (EC 6.1.1.3) (Threonyl-tRNA synthetase) (ThrRS)	tr|A0A318U0B4|A0A318U0B4_9BRAD	A0A318U0B4	Rhodopseudomonas faecalis	0.8897	0.558627	9066.38	7304.66	0.805686	0.00688007
Anaerobic Mg-protoporphyrin IX monomethyl ester oxidative cyclase	tr|A0A318TC38|A0A318TC38_9BRAD	A0A318TC38	Rhodopseudomonas faecalis	0.3385	0.00398821	49671.7	15370.4	0.309439	0.000112665
Dual-specificity RNA methyltransferase RlmN (EC 2.1.1.192) (23S rRNA (adenine(2503)-C(2))-methyltransferase) (23S rRNA m2A2503 methyltransferase) (Ribosomal RNA large subunit methyltransferase N) (tRNA (adenine(37)-C(2))-methyltransferase) (tRNA m2A37 methyltransferase)	tr|A0A318TAY9|A0A318TAY9_9BRAD	A0A318TAY9	Rhodopseudomonas faecalis	0.3932	0.0263225	3804.67	2328.24	0.611942	0.0166077
Glutathione peroxidase	tr|A0A318TD12|A0A318TD12_9BRAD	A0A318TD12	Rhodopseudomonas faecalis	1.6262	0.0641031	6464.31	9210.06	1.42475	0.0568408
HAD superfamily hydrolase (TIGR01459 family)	tr|A0A318TJ36|A0A318TJ36_9BRAD	A0A318TJ36	Rhodopseudomonas faecalis	0.8597	0.620205	2725.9	1788.73	0.656195	0.00876017
NADPH:quinone reductase-like Zn-dependent oxidoreductase	tr|A0A318TVR0|A0A318TVR0_9BRAD	A0A318TVR0	Rhodopseudomonas faecalis	1.0674	0.840797	18399.6	15031.6	0.816954	0.404955
Ribonuclease BN (tRNA processing enzyme)	tr|A0A318TI76|A0A318TI76_9BRAD	A0A318TI76	Rhodopseudomonas faecalis	1.3523	0.123865	6491.69	8031.41	1.23718	0.151668
Acetylornithine aminotransferase (ACOAT) (EC 2.6.1.11)	tr|A0A318T7D8|A0A318T7D8_9BRAD	A0A318T7D8	Rhodopseudomonas faecalis	0.8615	0.504507	13854.7	10720.3	0.773767	0.00181746
30S ribosomal protein S5	tr|A0A318TEK6|A0A318TEK6_9BRAD	A0A318TEK6	Rhodopseudomonas faecalis	0.9864	0.949251	131669	115386	0.876335	0.0255729
Tripartite-type tricarboxylate transporter receptor subunit TctC	tr|A0A318TC39|A0A318TC39_9BRAD	A0A318TC39	Rhodopseudomonas faecalis	2.8234	0.0113646	27048.5	69748.6	2.57865	0.00809426
PCLP domain-containing protein	tr|A0A318TDD3|A0A318TDD3_9BRAD	A0A318TDD3	Rhodopseudomonas faecalis	1.9117	0.244771	37129.9	63921.3	1.72156	0.12538
30S ribosomal protein S17	tr|A0A318TAD8|A0A318TAD8_9BRAD	A0A318TAD8	Rhodopseudomonas faecalis	0.9432	0.803703	193136	159600	0.826363	0.0915402
NADPH:quinone reductase-like Zn-dependent oxidoreductase	tr|A0A318TBA4|A0A318TBA4_9BRAD	A0A318TBA4	Rhodopseudomonas faecalis	1.4415	0.21367	2524.27	3034.62	1.20217	0.169516
Enamine deaminase RidA (YjgF/YER057c/UK114 family)	tr|A0A318TMB0|A0A318TMB0_9BRAD	A0A318TMB0	Rhodopseudomonas faecalis	1.7389	0.0213905	14022.5	21436.1	1.52868	0.000119498
NADH dehydrogenase subunit E	tr|A0A318TA71|A0A318TA71_9BRAD	A0A318TA71	Rhodopseudomonas faecalis	1.9112	0.122549	4119.4	5394.29	1.30949	0.0137009
1-hydroxycarotenoid 3,4-desaturase	tr|A0A318TDV9|A0A318TDV9_9BRAD	A0A318TDV9	Rhodopseudomonas faecalis	1.1882	0.339532	3041.04	3014.37	0.991233	0.96926
4-diphosphocytidyl-2-C-methyl-D-erythritol kinase (CMK) (EC 2.7.1.148) (4-(cytidine-5'-diphospho)-2-C-methyl-D-erythritol kinase)	tr|A0A318TWV5|A0A318TWV5_9BRAD	A0A318TWV5	Rhodopseudomonas faecalis	1.0377	0.873169	5384.53	5015.85	0.931529	0.493463
Putative NAD(P)-binding protein	tr|A0A318TI75|A0A318TI75_9BRAD	A0A318TI75	Rhodopseudomonas faecalis	2.0337	0.0147095	1247.21	1856.3	1.48837	0.0192646
Multidrug efflux pump	tr|A0A318TLT2|A0A318TLT2_9BRAD	A0A318TLT2	Rhodopseudomonas faecalis	0.5811	0.265718	3229.69	3817.2	1.18191	0.129001
Flagellar protein FlbT	tr|A0A318T7V9|A0A318T7V9_9BRAD	A0A318T7V9	Rhodopseudomonas faecalis	0.8205	0.41038	16983.1	12355.1	0.727491	0.00134885
Phasin	tr|A0A318TD51|A0A318TD51_9BRAD	A0A318TD51	Rhodopseudomonas faecalis	0.9858	0.959903	9701.28	8812.47	0.908382	0.617853
Signal peptide protein	tr|A0A318TD90|A0A318TD90_9BRAD	A0A318TD90	Rhodopseudomonas faecalis	0.7137	0.443386	4599.82	3559.21	0.773772	0.200545
Putative phosphodiesterase	tr|A0A318TS96|A0A318TS96_9BRAD	A0A318TS96	Rhodopseudomonas faecalis	1.092	0.827524	1069.64	1084.88	1.01425	0.932447
4-alpha-glucanotransferase (EC 2.4.1.25) (Amylomaltase) (Disproportionating enzyme)	tr|A0A318TAU6|A0A318TAU6_9BRAD	A0A318TAU6	Rhodopseudomonas faecalis	1.5146	0.0599614	1981.82	2503.12	1.26304	0.00107631
Lactate dehydrogenase-like 2-hydroxyacid dehydrogenase	tr|A0A318T993|A0A318T993_9BRAD	A0A318T993	Rhodopseudomonas faecalis	1.2052	0.352087	5103.21	5671.57	1.11137	0.171526
Amino acid ABC transporter substrate-binding protein (PAAT family)	tr|A0A318TLN8|A0A318TLN8_9BRAD	A0A318TLN8	Rhodopseudomonas faecalis	1.2776	0.356324	31812.4	33324.9	1.04755	0.71363
Cytochrome b mRNA-processing protein 4	tr|A0A318T7P2|A0A318T7P2_9BRAD	A0A318T7P2	Rhodopseudomonas faecalis	0.498	0.161896	16054.8	8694.12	0.541527	0.0533944
Endonuclease III (EC 4.2.99.18) (DNA-(apurinic or apyrimidinic site) lyase)	tr|A0A318T9H7|A0A318T9H7_9BRAD	A0A318T9H7	Rhodopseudomonas faecalis	1.1896	0.377017	3843.54	3453.99	0.898648	0.333825
Protease HtpX homolog (EC 3.4.24.-)	tr|A0A318TKU4|A0A318TKU4_9BRAD	A0A318TKU4	Rhodopseudomonas faecalis	1.7634	0.0623284	3249.41	4821.1	1.48369	0.00479606
Putative ABC transport system ATP-binding protein	tr|A0A318TR67|A0A318TR67_9BRAD	A0A318TR67	Rhodopseudomonas faecalis	2.3441	0.00590437	5062.89	10048.6	1.98476	0.118333
Thioredoxin	tr|A0A318TBN8|A0A318TBN8_9BRAD	A0A318TBN8	Rhodopseudomonas faecalis	1.9215	0.00942385	20727.2	35301.4	1.70314	0.00167535
Pimeloyl-CoA dehydrogenase large subunit	tr|A0A318TJ13|A0A318TJ13_9BRAD	A0A318TJ13	Rhodopseudomonas faecalis	1.139	0.585836	11435.7	11498.1	1.00546	0.953778
Glutathione S-transferase	tr|A0A318TBQ0|A0A318TBQ0_9BRAD	A0A318TBQ0	Rhodopseudomonas faecalis	1.0446	0.860842	3325.35	2318.44	0.697202	0.0650693
16S rRNA (Cytosine967-C5)-methyltransferase	tr|A0A318TEV8|A0A318TEV8_9BRAD	A0A318TEV8	Rhodopseudomonas faecalis	0.9903	0.957027	6160.32	5403.03	0.877069	0.0625803
Amino acid/amide ABC transporter substrate-binding protein (HAAT family)	tr|A0A318TL40|A0A318TL40_9BRAD	A0A318TL40	Rhodopseudomonas faecalis	0.5637	0.475699	4014.69	3910.15	0.973962	0.912629
TP901-1 family phage major tail protein	tr|A0A318TM50|A0A318TM50_9BRAD	A0A318TM50	Rhodopseudomonas faecalis	0.4454	0.215661	3906.7	4004.35	1.025	0.937314
Putative membrane protein	tr|A0A318THN8|A0A318THN8_9BRAD	A0A318THN8	Rhodopseudomonas faecalis	0.892	0.694334	4233.96	4979.19	1.17601	0.416178
Histidine kinase	tr|A0A318TDX8|A0A318TDX8_9BRAD	A0A318TDX8	Rhodopseudomonas faecalis	1.1144	0.572031	7329.92	7282.47	0.993526	0.926173
Lysozyme family protein	tr|A0A318TZ87|A0A318TZ87_9BRAD	A0A318TZ87	Rhodopseudomonas faecalis	0.6775	0.431479	1275.04	845.352	0.662998	0.0350643
Signal peptide protein	tr|A0A318TAL5|A0A318TAL5_9BRAD	A0A318TAL5	Rhodopseudomonas faecalis	0.3464	0.0480095	13240.9	11425	0.862855	0.325573
Uncharacterized LabA/DUF88 family protein	tr|A0A318TVS3|A0A318TVS3_9BRAD	A0A318TVS3	Rhodopseudomonas faecalis	1.0607	0.849094	23253.3	22050	0.948253	0.782906
3-hydroxyacyl-CoA dehydrogenase	tr|A0A318TBD8|A0A318TBD8_9BRAD	A0A318TBD8	Rhodopseudomonas faecalis	1.8388	0.0242261	16899.5	27183.6	1.60855	4.42093e-05
Nicotinate-nucleotide--dimethylbenzimidazole phosphoribosyltransferase (NN:DBI PRT) (EC 2.4.2.21) (N(1)-alpha-phosphoribosyltransferase)	tr|A0A318TP00|A0A318TP00_9BRAD	A0A318TP00	Rhodopseudomonas faecalis	0.4582	0.0808981	5669.41	2910.18	0.513313	0.0324392
Aspartate-semialdehyde dehydrogenase (ASA dehydrogenase) (ASADH) (EC 1.2.1.11) (Aspartate-beta-semialdehyde dehydrogenase)	tr|A0A318TBR9|A0A318TBR9_9BRAD	A0A318TBR9	Rhodopseudomonas faecalis	0.8937	0.584916	22018.7	17464.6	0.793173	0.00267821
Chaperone required for assembly of F1-ATPase	tr|A0A318TN39|A0A318TN39_9BRAD	A0A318TN39	Rhodopseudomonas faecalis	0.7779	0.426533	3333.11	2729.28	0.818838	0.119996
Amino acid/amide ABC transporter ATP-binding protein 1 (HAAT family)	tr|A0A318TL13|A0A318TL13_9BRAD	A0A318TL13	Rhodopseudomonas faecalis	1.2953	0.238298	5676.36	6272.74	1.10506	0.420503
HlyD family secretion protein	tr|A0A318THF9|A0A318THF9_9BRAD	A0A318THF9	Rhodopseudomonas faecalis	1.2446	0.508513	2468.45	2659.86	1.07754	0.645824
1-deoxy-D-xylulose-5-phosphate synthase (EC 2.2.1.7) (1-deoxyxylulose-5-phosphate synthase) (DXP synthase) (DXPS)	tr|A0A318TD48|A0A318TD48_9BRAD	A0A318TD48	Rhodopseudomonas faecalis	0.9192	0.706652	21761.9	18457.2	0.848141	0.135923
NAD(P)-dependent dehydrogenase (Short-subunit alcohol dehydrogenase family)	tr|A0A318TLN6|A0A318TLN6_9BRAD	A0A318TLN6	Rhodopseudomonas faecalis	1.1926	0.29341	8497.59	8695.82	1.02333	0.630058
Methanogenic corrinoid protein MtbC1	tr|A0A318TRZ7|A0A318TRZ7_9BRAD	A0A318TRZ7	Rhodopseudomonas faecalis	1.168	0.601814	3108.15	2993.66	0.963165	0.809997
Chaperone protein ClpB	tr|A0A318TC87|A0A318TC87_9BRAD	A0A318TC87	Rhodopseudomonas faecalis	1.4996	0.0637988	7931.92	10409.2	1.31231	0.0159371
Glutathione S-transferase	tr|A0A318TKE9|A0A318TKE9_9BRAD	A0A318TKE9	Rhodopseudomonas faecalis	1.4262	0.144205	3261.1	3174.31	0.973385	0.396435
Acetolactate synthase (EC 2.2.1.6)	tr|A0A318TBZ1|A0A318TBZ1_9BRAD	A0A318TBZ1	Rhodopseudomonas faecalis	1.461	0.129644	25244.8	35189.6	1.39393	0.00247584
RNA polymerase sigma factor RpoH (RNA polymerase sigma-32 factor)	tr|A0A318TIH4|A0A318TIH4_9BRAD	A0A318TIH4	Rhodopseudomonas faecalis	1.5114	0.416494	1473.56	1603.88	1.08844	0.807367
Signal peptide protein	tr|A0A318TBZ3|A0A318TBZ3_9BRAD	A0A318TBZ3	Rhodopseudomonas faecalis	1.1246	0.717128	55346.8	58308.2	1.05351	0.841086
Argininosuccinate synthase (EC 6.3.4.5) (Citrulline--aspartate ligase)	tr|A0A318TA84|A0A318TA84_9BRAD	A0A318TA84	Rhodopseudomonas faecalis	1.0622	0.776082	15138.4	14291.3	0.94404	0.453163
Glutathione reductase (GRase) (EC 1.8.1.7)	tr|A0A318TTA6|A0A318TTA6_9BRAD	A0A318TTA6	Rhodopseudomonas faecalis	1.1501	0.383137	6035.52	6267.5	1.03844	0.451288
Periplasmic serine endoprotease DegP-like (EC 3.4.21.107)	tr|A0A318TAF1|A0A318TAF1_9BRAD	A0A318TAF1	Rhodopseudomonas faecalis	1.4326	0.105325	10397.7	13345	1.28346	0.0235324
Molybdate transport system substrate-binding protein	tr|A0A318TIL8|A0A318TIL8_9BRAD	A0A318TIL8	Rhodopseudomonas faecalis	3.5831	0.002102	10083.6	32774.7	3.2503	0.00111952
30S ribosomal protein S7	tr|A0A318TCT3|A0A318TCT3_9BRAD	A0A318TCT3	Rhodopseudomonas faecalis	0.7412	0.293873	98139.4	64932	0.661631	0.0249443
50S ribosomal protein L15	tr|A0A318TAC7|A0A318TAC7_9BRAD	A0A318TAC7	Rhodopseudomonas faecalis	0.7677	0.36464	80743.5	54778.7	0.678428	0.0213672
Uncharacterized protein DUF3168	tr|A0A318TZ77|A0A318TZ77_9BRAD	A0A318TZ77	Rhodopseudomonas faecalis	1.4933	0.328636	7394.32	6444.5	0.871547	0.522567
Glutamine--tRNA ligase (EC 6.1.1.18) (Glutaminyl-tRNA synthetase) (GlnRS)	tr|A0A318TUD5|A0A318TUD5_9BRAD	A0A318TUD5	Rhodopseudomonas faecalis	1.0149	0.95163	10149.3	9054.78	0.892156	0.217282
(3S)-malyl-CoA thioesterase	tr|A0A318TCR1|A0A318TCR1_9BRAD	A0A318TCR1	Rhodopseudomonas faecalis	1.3757	0.038405	5488.63	6841.21	1.24643	0.00511577
Methionine aminopeptidase (MAP) (MetAP) (EC 3.4.11.18) (Peptidase M)	tr|A0A318TD50|A0A318TD50_9BRAD	A0A318TD50	Rhodopseudomonas faecalis	0.8037	0.297815	13058	9202.85	0.704768	0.016121
Amino acid/amide ABC transporter substrate-binding protein (HAAT family)	tr|A0A318TYX3|A0A318TYX3_9BRAD	A0A318TYX3	Rhodopseudomonas faecalis	1.2539	0.501309	30367.2	33653.1	1.1082	0.609913
Electron transfer flavoprotein-ubiquinone oxidoreductase (ETF-QO) (EC 1.5.5.1)	tr|A0A318TGV4|A0A318TGV4_9BRAD	A0A318TGV4	Rhodopseudomonas faecalis	1.1732	0.442286	11277.9	11749.4	1.04181	0.494228
50S ribosomal protein L16	tr|A0A318TEL7|A0A318TEL7_9BRAD	A0A318TEL7	Rhodopseudomonas faecalis	0.8909	0.600462	214094	169117	0.789919	0.0065472
DNA polymerase III subunit gamma/tau (EC 2.7.7.7)	tr|A0A318TIT8|A0A318TIT8_9BRAD	A0A318TIT8	Rhodopseudomonas faecalis	1.0277	0.88515	3876.51	3535.5	0.91203	0.0837499
DUF2076 domain-containing protein	tr|A0A318THY6|A0A318THY6_9BRAD	A0A318THY6	Rhodopseudomonas faecalis	2.8578	0.00410208	6536.66	17373.4	2.65785	0.00863539
Hippurate hydrolase	tr|A0A318TJS0|A0A318TJS0_9BRAD	A0A318TJS0	Rhodopseudomonas faecalis	1.3015	0.41488	7919.39	9958.76	1.25752	0.488877
Acyl-CoA dehydrogenase	tr|A0A318TQR7|A0A318TQR7_9BRAD	A0A318TQR7	Rhodopseudomonas faecalis	1.2136	0.420128	3116.46	3377.72	1.08383	0.474632
50S ribosomal protein L32	tr|A0A318TCF4|A0A318TCF4_9BRAD	A0A318TCF4	Rhodopseudomonas faecalis	0.7611	0.664469	33422.5	20245.8	0.605754	0.187631
Protein-disulfide isomerase	tr|A0A318TI31|A0A318TI31_9BRAD	A0A318TI31	Rhodopseudomonas faecalis	0.5219	0.0122306	6855.25	4077.86	0.594853	0.0442052
Uroporphyrinogen-III synthase (EC 4.2.1.75)	tr|A0A318TDH0|A0A318TDH0_9BRAD	A0A318TDH0	Rhodopseudomonas faecalis	0.6832	0.0715141	19716.2	12984.1	0.658548	0.000275029
Uncharacterized protein DUF2849	tr|A0A318THQ8|A0A318THQ8_9BRAD	A0A318THQ8	Rhodopseudomonas faecalis	0.8824	0.656583	27424	21512.6	0.784444	0.261186
Corrinoid adenosyltransferase (EC 2.5.1.17) (Cob(II)alamin adenosyltransferase) (Cob(II)yrinic acid a,c-diamide adenosyltransferase) (Cobinamide/cobalamin adenosyltransferase)	tr|A0A318T8P5|A0A318T8P5_9BRAD	A0A318T8P5	Rhodopseudomonas faecalis	4.925	0.0154791	8763	13066.6	1.49111	0.0642758
Amino acid/amide ABC transporter ATP-binding protein 1 (HAAT family)	tr|A0A318TGD2|A0A318TGD2_9BRAD	A0A318TGD2	Rhodopseudomonas faecalis	0.8996	0.741941	1764.45	979.274	0.555002	0.229847
Amino acid/amide ABC transporter ATP-binding protein 1 (HAAT family)	tr|A0A318TIY6|A0A318TIY6_9BRAD	A0A318TIY6	Rhodopseudomonas faecalis	1.0791	0.787371	#VALUE!	8208.54	#VALUE!	#VALUE!
Magnesium chelatase accessory protein	tr|A0A318TDQ0|A0A318TDQ0_9BRAD	A0A318TDQ0	Rhodopseudomonas faecalis	1.2843	0.411486	4817.78	5004.65	1.03879	0.816891
Elongation factor P (EF-P)	tr|A0A318TEY1|A0A318TEY1_9BRAD	A0A318TEY1	Rhodopseudomonas faecalis	0.7949	0.421749	41333.6	29200.5	0.70646	0.0351983
3-methyl-2-oxobutanoate hydroxymethyltransferase (EC 2.1.2.11) (Ketopantoate hydroxymethyltransferase) (KPHMT)	tr|A0A318TJQ1|A0A318TJQ1_9BRAD	A0A318TJQ1	Rhodopseudomonas faecalis	1.0533	0.814011	10801.1	10179	0.942405	0.327845
Bifunctional protein FolD [Includes: Methylenetetrahydrofolate dehydrogenase (EC 1.5.1.5); Methenyltetrahydrofolate cyclohydrolase (EC 3.5.4.9)]	tr|A0A318TDG3|A0A318TDG3_9BRAD	A0A318TDG3	Rhodopseudomonas faecalis	1.0557	0.798517	8688.87	8414	0.968366	0.602898
Succinate dehydrogenase flavoprotein subunit (EC 1.3.5.1)	tr|A0A318T8H9|A0A318T8H9_9BRAD	A0A318T8H9	Rhodopseudomonas faecalis	0.9492	0.834579	25376.4	21771.2	0.857933	0.114023
Coproporphyrinogen-III oxidase (EC 1.3.98.3)	tr|A0A318TD64|A0A318TD64_9BRAD	A0A318TD64	Rhodopseudomonas faecalis	0.7643	0.185838	29407.6	20079.9	0.682814	0.00425142
Acetylglutamate kinase (EC 2.7.2.8) (N-acetyl-L-glutamate 5-phosphotransferase) (NAG kinase) (NAGK)	tr|A0A318TMT0|A0A318TMT0_9BRAD	A0A318TMT0	Rhodopseudomonas faecalis	0.901	0.648428	15563.5	12409.2	0.797326	0.0297226
3',5'-cyclic AMP phosphodiesterase CpdA	tr|A0A318TGJ7|A0A318TGJ7_9BRAD	A0A318TGJ7	Rhodopseudomonas faecalis	1.1182	0.597596	24508	82879.2	3.38172	0.330105
Phytanoyl-CoA dioxygenase	tr|A0A318TH44|A0A318TH44_9BRAD	A0A318TH44	Rhodopseudomonas faecalis	1.5363	0.0411835	45425.5	61962.6	1.36405	0.000402679
Methylthioribose-1-phosphate isomerase (M1Pi) (MTR-1-P isomerase) (EC 5.3.1.23) (S-methyl-5-thioribose-1-phosphate isomerase)	tr|A0A318T6X8|A0A318T6X8_9BRAD	A0A318T6X8	Rhodopseudomonas faecalis	0.7912	0.363812	14077.8	9848.82	0.699598	0.0148441
NADP-dependent 3-hydroxy acid dehydrogenase YdfG	tr|A0A318TKV9|A0A318TKV9_9BRAD	A0A318TKV9	Rhodopseudomonas faecalis	2.7508	0.00425566	2192.24	5125.87	2.33819	0.000773797
Inorganic pyrophosphatase (EC 3.6.1.1) (Pyrophosphate phospho-hydrolase) (PPase)	tr|A0A318TFB6|A0A318TFB6_9BRAD	A0A318TFB6	Rhodopseudomonas faecalis	1.0768	0.750615	106273	100684	0.94741	0.49885
Invasion protein IalB	tr|A0A318TGY2|A0A318TGY2_9BRAD	A0A318TGY2	Rhodopseudomonas faecalis	0.8482	0.562172	32012.5	24357.6	0.760879	0.0959831
Phospholipid/cholesterol/gamma-HCH transport system substrate-binding protein	tr|A0A318T922|A0A318T922_9BRAD	A0A318T922	Rhodopseudomonas faecalis	1.1344	0.694101	4093.27	3390.87	0.828402	0.0933552
50S ribosomal protein L5	tr|A0A318TAJ1|A0A318TAJ1_9BRAD	A0A318TAJ1	Rhodopseudomonas faecalis	0.7696	0.369072	101183	69659.5	0.688448	0.0146609
Amino acid ABC transporter substrate-binding protein (PAAT family)	tr|A0A318T9Z2|A0A318T9Z2_9BRAD	A0A318T9Z2	Rhodopseudomonas faecalis	1.0641	0.800548	3125.17	2965.98	0.949062	0.586242
Anthranilate synthase (EC 4.1.3.27)	tr|A0A318TGW6|A0A318TGW6_9BRAD	A0A318TGW6	Rhodopseudomonas faecalis	0.8082	0.401546	8139.68	6246.83	0.767454	0.00453524
Glycogen synthase (EC 2.4.1.21) (Starch [bacterial glycogen] synthase)	tr|A0A318TRH0|A0A318TRH0_9BRAD	A0A318TRH0	Rhodopseudomonas faecalis	1.3873	0.164963	8864.45	10778.7	1.21595	0.0439063
CBS domain protein	tr|A0A318TA91|A0A318TA91_9BRAD	A0A318TA91	Rhodopseudomonas faecalis	1.2744	0.370986	11303.3	12522.2	1.10784	0.508436
Uncharacterized protein DUF4167	tr|A0A318TE93|A0A318TE93_9BRAD	A0A318TE93	Rhodopseudomonas faecalis	0.7907	0.361398	9520.36	6618.88	0.695234	0.0106717
Enoyl reductase (ER) domain-containing protein	tr|A0A318THZ4|A0A318THZ4_9BRAD	A0A318THZ4	Rhodopseudomonas faecalis	1.7491	0.00888495	7047.09	12339.2	1.75096	0.000216948
Uncharacterized protein YjbJ (UPF0337 family)	tr|A0A318THU0|A0A318THU0_9BRAD	A0A318THU0	Rhodopseudomonas faecalis	5.538	0.0611241	2401.1	8991.29	3.74465	0.0360634
Ubiquinone biosynthesis protein UbiU	tr|A0A318TDW0|A0A318TDW0_9BRAD	A0A318TDW0	Rhodopseudomonas faecalis	0.9202	0.742486	26926	22090.3	0.820408	0.0641312
Signal peptide protein	tr|A0A318TRC0|A0A318TRC0_9BRAD	A0A318TRC0	Rhodopseudomonas faecalis	0.5184	0.153008	9439.11	4879.43	0.516937	0.0513155
ABC-2 type transport system ATP-binding protein	tr|A0A318TDJ2|A0A318TDJ2_9BRAD	A0A318TDJ2	Rhodopseudomonas faecalis	1.1063	0.516461	7433.75	7298.76	0.981841	0.763639
Adenylosuccinate synthetase (AMPSase) (AdSS) (EC 6.3.4.4) (IMP--aspartate ligase)	tr|A0A318TJF3|A0A318TJF3_9BRAD	A0A318TJF3	Rhodopseudomonas faecalis	1.1116	0.666536	22124	21668.2	0.979397	0.821126
UDP-glucuronate decarboxylase (EC 4.1.1.35)	tr|A0A318TDA9|A0A318TDA9_9BRAD	A0A318TDA9	Rhodopseudomonas faecalis	0.8185	0.372841	5042.86	3661.13	0.726002	0.0243664
DUF1330 domain-containing protein	tr|A0A318T8E7|A0A318T8E7_9BRAD	A0A318T8E7	Rhodopseudomonas faecalis	0.7042	0.266407	83050.6	51339.9	0.618176	0.0354448
Transcription termination/antitermination protein NusA	tr|A0A318T8L6|A0A318T8L6_9BRAD	A0A318T8L6	Rhodopseudomonas faecalis	0.9511	0.833789	22011	18557.7	0.843107	0.0370298
UDP-N-acetylmuramoyl-tripeptide--D-alanyl-D-alanine ligase (EC 6.3.2.10) (D-alanyl-D-alanine-adding enzyme)	tr|A0A318TC30|A0A318TC30_9BRAD	A0A318TC30	Rhodopseudomonas faecalis	1.0373	0.833923	8645.01	7943.58	0.918864	0.379461
Enoyl-CoA hydratase/carnithine racemase	tr|A0A318TIZ8|A0A318TIZ8_9BRAD	A0A318TIZ8	Rhodopseudomonas faecalis	2.3285	0.00145045	5299.16	10076.4	1.90151	7.2984e-05
Putative thymidine phosphorylase (EC 2.4.2.4) (TdRPase)	tr|A0A318TA44|A0A318TA44_9BRAD	A0A318TA44	Rhodopseudomonas faecalis	1.2368	0.325168	7444.6	8482.01	1.13935	0.173448
Adenylyltransferase/sulfurtransferase	tr|A0A318T832|A0A318T832_9BRAD	A0A318T832	Rhodopseudomonas faecalis	1.03	0.899357	3072.49	3069.32	0.998966	0.995564
16S rRNA (Cytosine967-C5)-methyltransferase	tr|A0A318T8R5|A0A318T8R5_9BRAD	A0A318T8R5	Rhodopseudomonas faecalis	1.355	0.193888	5686.91	6719.63	1.1816	0.126527
GT2 family glycosyltransferase	tr|A0A318TD04|A0A318TD04_9BRAD	A0A318TD04	Rhodopseudomonas faecalis	0.8539	0.632467	1735.17	1274.06	0.734255	0.156255
Glycosyl transferase	tr|A0A318THB1|A0A318THB1_9BRAD	A0A318THB1	Rhodopseudomonas faecalis	0.8849	0.676122	692.943	558.527	0.806022	0.262075
Collagen triple helix repeat protein	tr|A0A318TD79|A0A318TD79_9BRAD	A0A318TD79	Rhodopseudomonas faecalis	7.2654	0.000766237	32496.8	191950	5.90676	0.000323103
Heat-inducible transcription repressor HrcA	tr|A0A318TBV4|A0A318TBV4_9BRAD	A0A318TBV4	Rhodopseudomonas faecalis	1.384	0.0967234	5053.43	6019.46	1.19116	0.0799979
2-methylcitrate dehydratase	tr|A0A318TKK7|A0A318TKK7_9BRAD	A0A318TKK7	Rhodopseudomonas faecalis	1.1187	0.640549	5445.29	5272.05	0.968186	0.773838
Nicotinate-nucleotide--dimethylbenzimidazole phosphoribosyltransferase (NN:DBI PRT) (EC 2.4.2.21) (N(1)-alpha-phosphoribosyltransferase)	tr|A0A318TEH3|A0A318TEH3_9BRAD	A0A318TEH3	Rhodopseudomonas faecalis	0.5948	0.114884	#VALUE!	#VALUE!	#VALUE!	#VALUE!
Homospermidine synthase	tr|A0A318TEL2|A0A318TEL2_9BRAD	A0A318TEL2	Rhodopseudomonas faecalis	1.6262	0.057184	59821.3	85398.6	1.42756	0.00241777
Propionyl-CoA carboxylase carboxyltransferase subunit	tr|A0A318TUG1|A0A318TUG1_9BRAD	A0A318TUG1	Rhodopseudomonas faecalis	0.7243	0.170998	33903.1	21735.8	0.641115	0.00217217
Secreted protein	tr|A0A318TG87|A0A318TG87_9BRAD	A0A318TG87	Rhodopseudomonas faecalis	1.2451	0.62128	5698.05	6146.09	1.07863	0.860824
50S ribosomal protein L9	tr|A0A318THJ9|A0A318THJ9_9BRAD	A0A318THJ9	Rhodopseudomonas faecalis	0.7877	0.316467	142407	100132	0.703138	0.00330017
K(+)-insensitive pyrophosphate-energized proton pump (EC 7.1.3.1) (Membrane-bound proton-translocating pyrophosphatase) (Pyrophosphate-energized inorganic pyrophosphatase) (H(+)-PPase)	tr|A0A318TFU3|A0A318TFU3_9BRAD	A0A318TFU3	Rhodopseudomonas faecalis	0.8155	0.705667	14094.1	9210.24	0.653481	0.294483
ZnF_CHCC domain-containing protein	tr|A0A318TDC9|A0A318TDC9_9BRAD	A0A318TDC9	Rhodopseudomonas faecalis	1.8392	0.165994	2495.27	3782	1.51567	0.117972
Cytochrome b pre-mRNA-processing protein 3	tr|A0A318TGN9|A0A318TGN9_9BRAD	A0A318TGN9	Rhodopseudomonas faecalis	0.9538	0.85007	47102.2	39800.9	0.84499	0.0840427
3-oxoacyl-[acyl-carrier protein] reductase	tr|A0A318TE19|A0A318TE19_9BRAD	A0A318TE19	Rhodopseudomonas faecalis	1.277	0.475002	4098.91	3675.99	0.896822	0.469404
Glutamate 5-kinase (EC 2.7.2.11) (Gamma-glutamyl kinase) (GK)	tr|A0A318TC63|A0A318TC63_9BRAD	A0A318TC63	Rhodopseudomonas faecalis	0.8757	0.498624	5060.98	4016.47	0.793616	0.00582547
UvrABC system protein A (UvrA protein) (Excinuclease ABC subunit A)	tr|A0A318TPR0|A0A318TPR0_9BRAD	A0A318TPR0	Rhodopseudomonas faecalis	1.1459	0.497791	6759.4	6463.06	0.956159	0.768284
Divinyl protochlorophyllide a 8-vinyl-reductase	tr|A0A318TBV3|A0A318TBV3_9BRAD	A0A318TBV3	Rhodopseudomonas faecalis	0.7164	0.167429	3909.93	2667.28	0.682181	0.00807357
Farnesyl-diphosphate synthase	tr|A0A318TDF0|A0A318TDF0_9BRAD	A0A318TDF0	Rhodopseudomonas faecalis	0.1917	0.0685033	13632.6	5773.51	0.423507	0.000399908
Glutamine-dependent NAD(+) synthetase (EC 6.3.5.1) (NAD(+) synthase [glutamine-hydrolyzing])	tr|A0A318TZL3|A0A318TZL3_9BRAD	A0A318TZL3	Rhodopseudomonas faecalis	0.9227	0.648925	3749.94	3412.68	0.910061	0.267337
Putative phosphoglycerate mutase	tr|A0A318TLD5|A0A318TLD5_9BRAD	A0A318TLD5	Rhodopseudomonas faecalis	0.9387	0.798828	2136.26	1892.28	0.885793	0.30867
Cell division coordinator CpoB	tr|A0A318TGK4|A0A318TGK4_9BRAD	A0A318TGK4	Rhodopseudomonas faecalis	1.0334	0.914091	6825.92	6431.71	0.942249	0.71266
Lipoprotein	tr|A0A318T9G9|A0A318T9G9_9BRAD	A0A318T9G9	Rhodopseudomonas faecalis	0.5787	0.203849	3028.34	1457.99	0.481447	0.21642
Ubiquinone/menaquinone biosynthesis C-methyltransferase UbiE (EC 2.1.1.163) (EC 2.1.1.201) (2-methoxy-6-polyprenyl-1,4-benzoquinol methylase) (Demethylmenaquinone methyltransferase)	tr|A0A318TBB4|A0A318TBB4_9BRAD	A0A318TBB4	Rhodopseudomonas faecalis	1.1034	0.614548	9624.36	9477.55	0.984745	0.791482
Isovaleryl-CoA dehydrogenase	tr|A0A318TCB9|A0A318TCB9_9BRAD	A0A318TCB9	Rhodopseudomonas faecalis	0.9116	0.617969	19748.3	16025.4	0.811482	0.00498815
ATP-dependent Clp protease ATP-binding subunit ClpA	tr|A0A318THE5|A0A318THE5_9BRAD	A0A318THE5	Rhodopseudomonas faecalis	1.0894	0.78635	11595.7	12650.2	1.09094	0.575299
Ribonucleoside-triphosphate reductase class III catalytic subunit	tr|A0A318TFZ2|A0A318TFZ2_9BRAD	A0A318TFZ2	Rhodopseudomonas faecalis	0.2009	0.00193556	7155.99	2644.46	0.369546	0.000694849
Molecular chaperone IbpA	tr|A0A318TJH1|A0A318TJH1_9BRAD	A0A318TJH1	Rhodopseudomonas faecalis	2.4622	0.144823	8835.21	17567.9	1.9884	0.113446
Aspartokinase (EC 2.7.2.4)	tr|A0A318T8P0|A0A318T8P0_9BRAD	A0A318T8P0	Rhodopseudomonas faecalis	0.8063	0.356329	17943.2	17407.6	0.970149	0.661537
Alcohol dehydrogenase	tr|A0A318TZN1|A0A318TZN1_9BRAD	A0A318TZN1	Rhodopseudomonas faecalis	0.8803	0.583602	10233.7	8851.8	0.864966	0.0267887
Diketogulonate reductase-like aldo/keto reductase	tr|A0A318TAK1|A0A318TAK1_9BRAD	A0A318TAK1	Rhodopseudomonas faecalis	1.1052	0.620513	10236.3	11773	1.15012	0.116333
Amino acid/amide ABC transporter substrate-binding protein (HAAT family)	tr|A0A318T788|A0A318T788_9BRAD	A0A318T788	Rhodopseudomonas faecalis	1.0013	0.995393	5625.32	5113.6	0.909033	0.525804
[truncated: 16 more rows]
[truncated: 5,000 more columns]

## Sheet: capsulatus
						Species/group adjusted
[truncated: 103 more rows]
[truncated: 5,000 more columns]

[truncated: 2 more sheets: Rhodobacter non capsulatus, Citrobacter]
