# Supplementary material for: Purple phototrophic bacteria release crotonate as metabolic overflow pathway to complement other redox-balancing routes
Source: Research Square preprint supplement (doi:10.21203/rs.3.rs-7242062/v1), 2025-09-02
Supplement: Supplementary file 2 [file 9767e624966b946853d6df5d.xlsx]

## Sheet: NoIC
Peak Name	Group	OS	p-value	Fold Change	# peptide
tr|A0A318TFS3|A0A318TFS3_9BRAD	Putative cold-shock DNA-binding protein OS	Rhodopseudomonas faecalis OX	0.03556	0.138677	1
tr|A0A318TBG0|A0A318TBG0_9BRAD	Sulfide dehydrogenase (Flavocytochrome c) flavoprotein subunit /cytochrome-dependent sulfide dehydrogenase (Flavoprotein) OS	Rhodopseudomonas faecalis OX	0.29349	0.153868	3
tr|A0A318TBN1|A0A318TBN1_9BRAD	HAD superfamily hydrolase (TIGR01509 family) OS	Rhodopseudomonas faecalis OX	0.03923	0.166498	9
tr|A0A2S4RX85|A0A2S4RX85_CITAM	Chaperone protein DnaK OS	Citrobacter amalonaticus OX	0.15262	0.208135	1
tr|A0A318TEU6|A0A318TEU6_9BRAD	Putative surface protein with fasciclin (FAS1) repeats OS	Rhodopseudomonas faecalis OX	0.04643	0.227273	10
tr|A0A318TGF3|A0A318TGF3_9BRAD	Lectin-like protein BA14k OS	Rhodopseudomonas faecalis OX	0.05171	0.263777	9
tr|Q07LR9|Q07LR9_RHOP5	NLPA lipoprotein OS	Rhodopseudomonas palustris (strain BisA53) OX	0.11498	0.287579	1
tr|A0A318TD79|A0A318TD79_9BRAD	Collagen triple helix repeat protein OS	Rhodopseudomonas faecalis OX	0.03656	0.289616	5
tr|A0A2T4JBI3|A0A2T4JBI3_RHOBL	D-xylose ABC transporter substrate-binding protein OS	Rhodobacter blasticus DSM 2131 OX	0.15281	0.295371	3
tr|B7TYI0|B7TYI0_ECOLX	Phosphate-binding protein PstS OS	Escherichia coli OX	0.08415	0.304812	1
tr|A0A318T9G0|A0A318T9G0_9BRAD	Uncharacterized protein DUF3108 OS	Rhodopseudomonas faecalis OX	0.12253	0.318377	1
tr|A0A318TW29|A0A318TW29_9BRAD	7-cyano-7-deazaguanine synthase OS	Rhodopseudomonas faecalis OX	0.37637	0.320845	1
tr|A0A0N8VFL6|A0A0N8VFL6_RHOCA	O-acetylhomoserine (Thiol)-lyase OS	Rhodobacter capsulatus OX	0.28613	0.330473	1
tr|A0A318TH98|A0A318TH98_9BRAD	S1-C subfamily serine protease OS	Rhodopseudomonas faecalis OX	0.28069	0.335974	1
tr|E6VHD5|E6VHD5_RHOPX	Glycosyl transferase group 1 OS	Rhodopseudomonas palustris (strain DX-1) OX	0.31301	0.351507	1
tr|A0A4U1JQC8|A0A4U1JQC8_RHOCA	30S ribosomal protein S2 OS	Rhodobacter capsulatus OX	0.22812	0.361268	2
tr|A0A318TG89|A0A318TG89_9BRAD	BolA protein family transcriptional regulator OS	Rhodopseudomonas faecalis OX	0.03532	0.36369	2
tr|A0A318TIL9|A0A318TIL9_9BRAD	Uncharacterized protein DUF2852 OS	Rhodopseudomonas faecalis OX	0.01223	0.387626	4
tr|A0A4U1JNM8|A0A4U1JNM8_RHOCA	Fructose-1,6-bisphosphate aldolase OS	Rhodobacter capsulatus OX	0.14755	0.414994	2
tr|A0A318TKQ3|A0A318TKQ3_9BRAD	Protein tyrosine/serine phosphatase OS	Rhodopseudomonas faecalis OX	0.00481	0.416983	5
tr|A0A2S4S400|A0A2S4S400_CITAM	NADP-dependent oxaloacetate-decarboxylating malate dehydrogenase OS	Citrobacter amalonaticus OX	0.046	0.417311	1
tr|A0A318TDT0|A0A318TDT0_9BRAD	Uncharacterized protein (TIGR02284 family) OS	Rhodopseudomonas faecalis OX	0.02409	0.438164	6
tr|A0A318TCZ8|A0A318TCZ8_9BRAD	UDP-N-acetyl-D-glucosamine dehydrogenase OS	Rhodopseudomonas faecalis OX	0.09349	0.442301	5
tr|A0A1G7BNV9|A0A1G7BNV9_RHOCA	(R)-ethylmalonyl-CoA mutase OS	Rhodobacter capsulatus OX	0.00384	0.450089	1
tr|A0A318TFN4|A0A318TFN4_9BRAD	Uncharacterized protein (DUF2147 family) OS	Rhodopseudomonas faecalis OX	0.01127	0.451332	4
tr|A0A0V9JAB0|A0A0V9JAB0_9ENTR	Sulfate transporter subunit OS	Citrobacter sp. 50677481 OX	0.34802	0.454672	1
tr|A0A318TLS1|A0A318TLS1_9BRAD	Uncharacterized protein OS	Rhodopseudomonas faecalis OX	0.11713	0.457191	9
tr|A0A2T4J417|A0A2T4J417_RHOBL	Enolase OS	Rhodobacter blasticus DSM 2131 OX	0.17169	0.463863	1
tr|A0A318TA71|A0A318TA71_9BRAD	NADH dehydrogenase subunit E OS	Rhodopseudomonas faecalis OX	0.1656	0.465543	2
tr|A0A318TFX1|A0A318TFX1_9BRAD	Leucyl/phenylalanyl-tRNA--protein transferase OS	Rhodopseudomonas faecalis OX	0.05349	0.466648	1
tr|A0A318T830|A0A318T830_9BRAD	Ergothioneine biosynthesis protein EgtB OS	Rhodopseudomonas faecalis OX	0.01553	0.471628	1
tr|A0A318TTP2|A0A318TTP2_9BRAD	Diadenosine tetraphosphate (Ap4A) HIT family hydrolase OS	Rhodopseudomonas faecalis OX	0.3442	0.473096	3
tr|A0A318T9D2|A0A318T9D2_9BRAD	Uncharacterized protein OS	Rhodopseudomonas faecalis OX	0.04862	0.475398	5
tr|A8AKB2|A8AKB2_CITK8	Uncharacterized protein OS	Citrobacter koseri (strain ATCC BAA-895 / CDC 4225-83 / SGSC4696) OX	0.2585	0.479456	1
tr|A0A318T842|A0A318T842_9BRAD	UPF0753 protein BJ122_1253 OS	Rhodopseudomonas faecalis OX	0.18044	0.485563	10
tr|A0A318TDI6|A0A318TDI6_9BRAD	NAD(P)-dependent dehydrogenase (Short-subunit alcohol dehydrogenase family) OS	Rhodopseudomonas faecalis OX	0.06421	0.490301	7
tr|A0A318TAZ4|A0A318TAZ4_9BRAD	Putative tellurite resistance protein B-like protein OS	Rhodopseudomonas faecalis OX	0.03921	0.501608	4
tr|A0A318TBW4|A0A318TBW4_9BRAD	Putative Fe-Mo cluster-binding NifX family protein OS	Rhodopseudomonas faecalis OX	0.05657	0.506381	1
tr|A0A318TAQ9|A0A318TAQ9_9BRAD	Uncharacterized protein YjbJ (UPF0337 family) OS	Rhodopseudomonas faecalis OX	0.13602	0.50708	3
tr|A0A318TD82|A0A318TD82_9BRAD	Peptide methionine sulfoxide reductase MsrB OS	Rhodopseudomonas faecalis OX	0.02232	0.5075	3
tr|A0A318TAX3|A0A318TAX3_9BRAD	Putative cold-shock DNA-binding protein OS	Rhodopseudomonas faecalis OX	0.07262	0.521353	7
tr|A0A318TIL8|A0A318TIL8_9BRAD	Molybdate transport system substrate-binding protein OS	Rhodopseudomonas faecalis OX	0.01146	0.528149	7
tr|Q2J2U0|Q2J2U0_RHOP2	Acetyl-CoA acetyltransferase OS	Rhodopseudomonas palustris (strain HaA2) OX	0.13845	0.535476	3
tr|A0A318TL07|A0A318TL07_9BRAD	Cyclic pyranopterin monophosphate synthase OS	Rhodopseudomonas faecalis OX	0.27229	0.53644	1
tr|A0A318TDD3|A0A318TDD3_9BRAD	Uncharacterized protein OS	Rhodopseudomonas faecalis OX	0.21184	0.537314	5
tr|A0A318TTT4|A0A318TTT4_9BRAD	LTXXQ motif family protein OS	Rhodopseudomonas faecalis OX	0.03075	0.539512	1
tr|A0A4U1JS55|A0A4U1JS55_RHOCA	Bifunctional purine biosynthesis protein PurH OS	Rhodobacter capsulatus OX	0.26916	0.546834	3
tr|A0A0Q0V8V3|A0A0Q0V8V3_RHOCA	Serine hydroxymethyltransferase OS	Rhodobacter capsulatus OX	0.03212	0.549194	3
tr|D5AP32|D5AP32_RHOCB	Uncharacterized protein OS	Rhodobacter capsulatus (strain ATCC BAA-309 / NBRC 16581 / SB1003) OX	0.27284	0.552506	1
tr|A0A318T6Y8|A0A318T6Y8_9BRAD	Phosphate-binding protein PstS OS	Rhodopseudomonas faecalis OX	0.02084	0.564853	10
tr|A0A0Q0UN65|A0A0Q0UN65_RHOCA	Adenylyl-sulfate kinase OS	Rhodobacter capsulatus OX	0.34415	0.5666	2
tr|F8X117|F8X117_9BACT	DksA C4-type domain-containing protein OS	Dysgonomonas mossii DSM 22836 OX	0.17669	0.567319	1
tr|A0A318TL93|A0A318TL93_9BRAD	Putative monooxygenase ydhR OS	Rhodopseudomonas faecalis OX	0.08639	0.574776	2
tr|A0A318TKV1|A0A318TKV1_9BRAD	TetR family transcriptional regulator OS	Rhodopseudomonas faecalis OX	0.06799	0.576841	9
tr|A0A1G7HUJ3|A0A1G7HUJ3_RHOCA	Malonyl CoA-acyl carrier protein transacylase OS	Rhodobacter capsulatus OX	0.10374	0.583288	2
tr|A0A4U1JRX7|A0A4U1JRX7_RHOCA	BMP family ABC transporter substrate-binding protein OS	Rhodobacter capsulatus OX	0.16145	0.583828	1
tr|A0A1G7ET81|A0A1G7ET81_RHOCA	Elongation factor Tu (Fragment) OS	Rhodobacter capsulatus OX	0.51912	0.585042	3
tr|A0A318TTV0|A0A318TTV0_9BRAD	Long-chain acyl-CoA synthetase OS	Rhodopseudomonas faecalis OX	0.04397	0.585443	1
tr|A0A318TAX7|A0A318TAX7_9BRAD	Ribulose 1,5-bisphosphate carboxylase small subunit OS	Rhodopseudomonas faecalis OX	0.33959	0.587417	10
tr|A0A318U804|A0A318U804_9RHOB	ATP synthase subunit delta OS	Rhodobacter viridis OX	0.33675	0.588424	1
tr|A0A4V5PNZ1|A0A4V5PNZ1_RHOCA	Response regulator OS	Rhodobacter capsulatus OX	0.11792	0.595301	1
tr|A0A318TQ80|A0A318TQ80_9BRAD	Hemolysin-activating ACP:hemolysin acyltransferase OS	Rhodopseudomonas faecalis OX	0.08279	0.595817	2
tr|A0A318TYT5|A0A318TYT5_9BRAD	Amino acid/amide ABC transporter substrate-binding protein (HAAT family) OS	Rhodopseudomonas faecalis OX	0.02735	0.601757	10
tr|A0A318TZ77|A0A318TZ77_9BRAD	Uncharacterized protein DUF3168 OS	Rhodopseudomonas faecalis OX	0.03898	0.602764	2
tr|A0A521JIT2|A0A521JIT2_9CHLR	Cold-shock protein OS	Anaerolineaceae bacterium OX	0.45714	0.604578	1
tr|A0A0Q1A178|A0A0Q1A178_RHOCA	2Fe-2S iron-sulfur cluster binding domain-containing protein OS	Rhodobacter capsulatus OX	0.14729	0.608302	1
tr|A0A318U0Z4|A0A318U0Z4_9BRAD	Uncharacterized protein OS	Rhodopseudomonas faecalis OX	0.0485	0.60956	2
tr|A0A318TKE8|A0A318TKE8_9BRAD	Bacterioferritin OS	Rhodopseudomonas faecalis OX	0.11229	0.623632	10
tr|A0A2T4J7I8|A0A2T4J7I8_RHOBL	Spermidine/putrescine ABC transporter substrate-binding protein OS	Rhodobacter blasticus DSM 2131 OX	0.40026	0.625451	1
tr|D5AKF2|D5AKF2_RHOCB	Protein-export protein SecB OS	Rhodobacter capsulatus (strain ATCC BAA-309 / NBRC 16581 / SB1003) OX	0.3847	0.627965	1
tr|A0A318THE4|A0A318THE4_9BRAD	Serine protease SohB OS	Rhodopseudomonas faecalis OX	0.1349	0.62824	4
tr|F8WXS7|F8WXS7_9BACT	HTH asnC-type domain-containing protein OS	Dysgonomonas mossii DSM 22836 OX	0.21748	0.628936	1
tr|A0A318T911|A0A318T911_9BRAD	Uncharacterized protein OS	Rhodopseudomonas faecalis OX	0.10126	0.630569	10
tr|A0A318T9A3|A0A318T9A3_9BRAD	Fis family two component transcriptional regulator OS	Rhodopseudomonas faecalis OX	0.08696	0.632345	6
tr|A0A318TWD9|A0A318TWD9_9RHOB	Nucleoid-associated protein C8J30_11039 OS	Rhodobacter viridis OX	0.26124	0.632615	3
tr|A0A318TNU8|A0A318TNU8_9BRAD	Uncharacterized protein (DUF1330 family) OS	Rhodopseudomonas faecalis OX	4.2651e-05	0.634112	2
tr|A0A4Y9ILJ2|A0A4Y9ILJ2_9BACT	P-II family nitrogen regulator OS	Dysgonomonas mossii OX	0.10492	0.636237	1
tr|A0A1G7NHY2|A0A1G7NHY2_RHOCA	Putative thioredoxin OS	Rhodobacter capsulatus OX	0.36612	0.637041	2
tr|A0A4U1JT48|A0A4U1JT48_RHOCA	Nucleoside diphosphate kinase OS	Rhodobacter capsulatus OX	0.2101	0.638699	2
tr|F5J2K9|F5J2K9_9BACT	Uncharacterized protein OS	Dysgonomonas gadei ATCC BAA-286 OX	0.0941	0.639714	1
tr|A0A0Q0QUG3|A0A0Q0QUG3_RHOCA	Uncharacterized protein OS	Rhodobacter capsulatus OX	0.5906	0.640724	10
tr|A0A318TYZ0|A0A318TYZ0_9BRAD	Phosphoenolpyruvate carboxylase OS	Rhodopseudomonas faecalis OX	0.10928	0.642423	8
tr|A0A318TJK4|A0A318TJK4_9BRAD	NepR domain-containing protein OS	Rhodopseudomonas faecalis OX	0.0651	0.642934	5
tr|A0A2T4J9A4|A0A2T4J9A4_RHOBL	ABC transporter substrate-binding protein OS	Rhodobacter blasticus DSM 2131 OX	0.0875	0.645872	1
tr|A0A1G7CKH6|A0A1G7CKH6_RHOCA	Protein HflK OS	Rhodobacter capsulatus OX	0.44564	0.646006	2
tr|A0A318TB74|A0A318TB74_9BRAD	Citronellol/citronellal dehydrogenase OS	Rhodopseudomonas faecalis OX	0.00128	0.647309	6
tr|A0A1G7GFY2|A0A1G7GFY2_RHOCA	Geranylgeranyl reductase OS	Rhodobacter capsulatus OX	0.22759	0.647827	3
tr|A0A220QAV6|A0A220QAV6_CITFR	Ketodeoxygluconokinase OS	Citrobacter freundii OX	0.33805	0.648164	2
tr|D2TLR7|D2TLR7_CITRI	Peptidylprolyl isomerase OS	Citrobacter rodentium (strain ICC168) OX	0.14668	0.65102	1
tr|A0A0N1CAE0|A0A0N1CAE0_9BRAD	O-acetylhomoserine aminocarboxypropyltransferase OS	Rhodopseudomonas sp. AAP120 OX	0.23641	0.654202	5
tr|Q07RY1|Q07RY1_RHOP5	Magnesium protoporphyrin O-methyltransferase OS	Rhodopseudomonas palustris (strain BisA53) OX	0.12027	0.654222	1
sp|Q217M3|FCTA_RHOPB	Formyl-CoA:oxalate CoA-transferase OS	Rhodopseudomonas palustris (strain BisB18) OX	0.0257	0.654552	1
tr|A0A318TTX1|A0A318TTX1_9BRAD	Acetyltransferase (GNAT) family protein OS	Rhodopseudomonas faecalis OX	0.15524	0.655379	6
tr|A0A318TIA4|A0A318TIA4_9BRAD	Ribulose bisphosphate carboxylase large chain OS	Rhodopseudomonas faecalis OX	0.00432	0.65565	4
tr|A0A318TUU4|A0A318TUU4_9RHOB	ATP-dependent Clp protease proteolytic subunit OS	Rhodobacter viridis OX	0.52676	0.655728	1
tr|A0A318TD15|A0A318TD15_9BRAD	DNA-binding FrmR family transcriptional regulator OS	Rhodopseudomonas faecalis OX	0.05047	0.656287	1
tr|A0A318TM50|A0A318TM50_9BRAD	TP901-1 family phage major tail protein OS	Rhodopseudomonas faecalis OX	0.10088	0.657228	1
tr|A0A0N8VEZ1|A0A0N8VEZ1_RHOCA	50S ribosomal protein L3 OS	Rhodobacter capsulatus OX	0.10382	0.659024	4
tr|A0A318TI46|A0A318TI46_9BRAD	ModE family transcriptional regulator OS	Rhodopseudomonas faecalis OX	0.16858	0.65988	2
tr|D5AM13|D5AM13_RHOCB	50S ribosomal protein L30 OS	Rhodobacter capsulatus (strain ATCC BAA-309 / NBRC 16581 / SB1003) OX	0.53656	0.659973	2
tr|A0A0Q0QMK5|A0A0Q0QMK5_RHOCA	ATP synthase gamma chain OS	Rhodobacter capsulatus OX	0.45721	0.660799	1
tr|A0A318TFS8|A0A318TFS8_9BRAD	Universal stress protein family protein OS	Rhodopseudomonas faecalis OX	0.04918	0.66204	9
tr|A0A1G7KLF3|A0A1G7KLF3_RHOCA	Branched-chain-amino-acid aminotransferase OS	Rhodobacter capsulatus OX	0.33607	0.663382	1
tr|A0A318TCG1|A0A318TCG1_9BRAD	Methyltransferase family protein OS	Rhodopseudomonas faecalis OX	0.0896	0.665049	4
tr|A0A318TBX1|A0A318TBX1_9BRAD	Acetyltransferase OS	Rhodopseudomonas faecalis OX	0.0469	0.665335	10
tr|A0A318TKM3|A0A318TKM3_9BRAD	Uncharacterized protein OS	Rhodopseudomonas faecalis OX	0.2944	0.66543	2
tr|A0A318TKM6|A0A318TKM6_9BRAD	Periplasmic serine endoprotease DegP-like OS	Rhodopseudomonas faecalis OX	0.04397	0.665657	10
tr|A0A318TJU4|A0A318TJU4_9BRAD	DUF853 domain-containing protein OS	Rhodopseudomonas faecalis OX	0.00628	0.666406	10
tr|A0A318TGC2|A0A318TGC2_9BRAD	Phosphate-specific transport system accessory protein PhoU OS	Rhodopseudomonas faecalis OX	0.04257	0.666971	3
tr|A0A1G7LVC9|A0A1G7LVC9_RHOCA	Cytochrome c OS	Rhodobacter capsulatus OX	0.52847	0.667331	5
tr|A0A318TJ91|A0A318TJ91_9BRAD	Uncharacterized protein DUF3597 OS	Rhodopseudomonas faecalis OX	0.01094	0.669477	2
tr|A0A4U1JNT2|A0A4U1JNT2_RHOCA	Fumarate hydratase class II OS	Rhodobacter capsulatus OX	0.11184	0.670003	3
tr|A0A318TJM4|A0A318TJM4_9BRAD	Phasin OS	Rhodopseudomonas faecalis OX	0.07874	0.671433	10
tr|A0A318THZ3|A0A318THZ3_9BRAD	Uncharacterized protein OS	Rhodopseudomonas faecalis OX	0.01687	0.674202	1
tr|A0A0N8VEY8|A0A0N8VEY8_RHOCA	30S ribosomal protein S13 OS	Rhodobacter capsulatus OX	0.3253	0.674265	4
tr|A0A318T7C6|A0A318T7C6_9BRAD	GST-like protein OS	Rhodopseudomonas faecalis OX	0.05156	0.677304	6
tr|A0A318TCV3|A0A318TCV3_9BRAD	CubicO group peptidase (Beta-lactamase class C family) OS	Rhodopseudomonas faecalis OX	0.00018	0.678677	7
tr|A0A4U1JQZ9|A0A4U1JQZ9_RHOCA	Phosphoenolpyruvate carboxykinase (ATP) OS	Rhodobacter capsulatus OX	0.24326	0.680135	3
tr|A0A318TTT8|A0A318TTT8_9RHOB	10 kDa chaperonin OS	Rhodobacter viridis OX	0.51229	0.682614	2
tr|A0A318TK66|A0A318TK66_9BRAD	8-amino-7-oxononanoate synthase OS	Rhodopseudomonas faecalis OX	0.3135	0.683254	8
tr|A0A0Q0QY01|A0A0Q0QY01_RHOCA	ATP synthase subunit b OS	Rhodobacter capsulatus OX	0.30379	0.683842	1
tr|A0A0Q0WBR2|A0A0Q0WBR2_RHOCA	30S ribosomal protein S4 OS	Rhodobacter capsulatus OX	0.32033	0.683917	5
tr|A0A4U1JPD9|A0A4U1JPD9_RHOCA	Methylmalonyl-CoA mutase OS	Rhodobacter capsulatus OX	0.25202	0.68578	3
tr|A0A0N8VE58|A0A0N8VE58_RHOCA	30S ribosomal protein S9 OS	Rhodobacter capsulatus OX	0.41382	0.686039	1
tr|A0A318THH9|A0A318THH9_9BRAD	Uncharacterized protein OS	Rhodopseudomonas faecalis OX	0.00433	0.686185	5
tr|A0A318TCF2|A0A318TCF2_9BRAD	Uncharacterized protein OS	Rhodopseudomonas faecalis OX	0.03446	0.686343	2
tr|A0A0N1C3D1|A0A0N1C3D1_9BRAD	1,4-butanediol diacrylate esterase OS	Rhodopseudomonas sp. AAP120 OX	0.11555	0.688112	2
tr|D5ALZ9|D5ALZ9_RHOCB	50S ribosomal protein L22 OS	Rhodobacter capsulatus (strain ATCC BAA-309 / NBRC 16581 / SB1003) OX	0.49381	0.690443	3
tr|A0A318TJ94|A0A318TJ94_9BRAD	Enoyl-[acyl-carrier-protein] reductase [NADH] OS	Rhodopseudomonas faecalis OX	0.01397	0.692607	8
tr|Q2IT11|Q2IT11_RHOP2	LemA OS	Rhodopseudomonas palustris (strain HaA2) OX	0.27108	0.694543	2
tr|A0A318TFH7|A0A318TFH7_9BRAD	DUF1244 domain-containing protein OS	Rhodopseudomonas faecalis OX	0.00699	0.696068	3
tr|A0A318TKD9|A0A318TKD9_9BRAD	ATP-dependent dethiobiotin synthetase BioD OS	Rhodopseudomonas faecalis OX	0.13503	0.696718	4
tr|A0A2T4JAB8|A0A2T4JAB8_RHOBL	Peptidyl-prolyl cis-trans isomerase OS	Rhodobacter blasticus DSM 2131 OX	0.34587	0.697236	1
tr|A0A318TEH7|A0A318TEH7_9BRAD	Uncharacterized protein OS	Rhodopseudomonas faecalis OX	0.02402	0.700413	2
tr|A0A318TKR2|A0A318TKR2_9BRAD	Citrate synthase OS	Rhodopseudomonas faecalis OX	0.20899	0.701139	9
tr|D5AL40|D5AL40_RHOCB	50S ribosomal protein L21 OS	Rhodobacter capsulatus (strain ATCC BAA-309 / NBRC 16581 / SB1003) OX	0.47413	0.70138	3
tr|A0A318T935|A0A318T935_9BRAD	Hydroxymethylpyrimidine kinase /phosphomethylpyrimidine kinase OS	Rhodopseudomonas faecalis OX	0.17177	0.701427	2
tr|D5AQI5|D5AQI5_RHOCB	50S ribosomal protein L25 OS	Rhodobacter capsulatus (strain ATCC BAA-309 / NBRC 16581 / SB1003) OX	0.26174	0.701682	6
tr|A0A0Q0UUA1|A0A0Q0UUA1_RHOCA	3-hydroxybutyrate dehydrogenase OS	Rhodobacter capsulatus OX	0.33881	0.70228	1
tr|A0A0D7ETC5|A0A0D7ETC5_RHOPL	Lysine--tRNA ligase OS	Rhodopseudomonas palustris OX	0.18997	0.702554	1
tr|A0A4U1JPG8|A0A4U1JPG8_RHOCA	Translation initiation factor IF-3 OS	Rhodobacter capsulatus OX	0.50641	0.702656	1
tr|A0A318TJX0|A0A318TJX0_9BRAD	HK97 family phage major capsid protein OS	Rhodopseudomonas faecalis OX	0.20985	0.703629	10
tr|A0A318U0C4|A0A318U0C4_9BRAD	Uncharacterized protein OS	Rhodopseudomonas faecalis OX	0.16127	0.703794	2
tr|D5AL39|D5AL39_RHOCB	50S ribosomal protein L27 OS	Rhodobacter capsulatus (strain ATCC BAA-309 / NBRC 16581 / SB1003) OX	0.63729	0.704243	1
tr|A0A318TGK2|A0A318TGK2_9BRAD	Uncharacterized protein OS	Rhodopseudomonas faecalis OX	0.05662	0.706155	2
tr|A0A318TL13|A0A318TL13_9BRAD	Amino acid/amide ABC transporter ATP-binding protein 1 (HAAT family) OS	Rhodopseudomonas faecalis OX	0.0483	0.708965	10
tr|A0A318TIZ5|A0A318TIZ5_9BRAD	NAD(P)-dependent dehydrogenase (Short-subunit alcohol dehydrogenase family) OS	Rhodopseudomonas faecalis OX	0.00075	0.709836	9
tr|A0A2T4J8U5|A0A2T4J8U5_RHOBL	Amino acid ABC transporter OS	Rhodobacter blasticus DSM 2131 OX	0.3102	0.710471	1
tr|D5AR74|D5AR74_RHOCB	50S ribosomal protein L35 OS	Rhodobacter capsulatus (strain ATCC BAA-309 / NBRC 16581 / SB1003) OX	0.62606	0.710658	1
tr|A0A318TC58|A0A318TC58_9BRAD	Protein SlyX homolog OS	Rhodopseudomonas faecalis OX	0.05643	0.712015	1
tr|A0A318T8N2|A0A318T8N2_9BRAD	Acetyl-CoA acetyltransferase OS	Rhodopseudomonas faecalis OX	0.01663	0.71255	10
tr|A0A318T817|A0A318T817_9BRAD	Phosphate import ATP-binding protein PstB OS	Rhodopseudomonas faecalis OX	0.01657	0.713157	6
tr|A0A318T8Z8|A0A318T8Z8_9BRAD	Amino acid/amide ABC transporter substrate-binding protein (HAAT family) OS	Rhodopseudomonas faecalis OX	0.05866	0.714212	6
tr|A0A318TRQ7|A0A318TRQ7_9BRAD	NAD(P)H dehydrogenase (quinone) OS	Rhodopseudomonas faecalis OX	0.06162	0.71475	1
tr|A0A1G7H648|A0A1G7H648_RHOCA	Ribulose bisphosphate carboxylase OS	Rhodobacter capsulatus OX	0.23971	0.71529	6
tr|A0A318TCI4|A0A318TCI4_9BRAD	Winged helix family two component transcriptional regulator OS	Rhodopseudomonas faecalis OX	0.05979	0.715776	7
tr|A0A318TJH1|A0A318TJH1_9BRAD	Molecular chaperone IbpA OS	Rhodopseudomonas faecalis OX	0.08576	0.715921	6
tr|A0A1G7BXZ3|A0A1G7BXZ3_RHOCA	Probable branched-chain-amino-acid aminotransferase OS	Rhodobacter capsulatus OX	0.56654	0.71728	1
tr|A0A318TPP8|A0A318TPP8_9BRAD	Uncharacterized protein OS	Rhodopseudomonas faecalis OX	0.00224	0.717529	10
tr|A0A418UX21|A0A418UX21_RHOPL	Uncharacterized protein OS	Rhodopseudomonas palustris OX	0.29761	0.718859	2
tr|A0A318TCZ4|A0A318TCZ4_9BRAD	Sulfate transport system substrate-binding protein OS	Rhodopseudomonas faecalis OX	0.31247	0.719507	10
tr|A0A318TBT9|A0A318TBT9_9BRAD	Sporulation protein YlmC with PRC-barrel domain OS	Rhodopseudomonas faecalis OX	0.18992	0.720534	4
tr|A0A4U1JUK0|A0A4U1JUK0_RHOCA	Coproporphyrinogen-III oxidase OS	Rhodobacter capsulatus OX	0.43312	0.720543	2
tr|A0A318TIX5|A0A318TIX5_9BRAD	Glycine/D-amino acid oxidase-like deaminating enzyme OS	Rhodopseudomonas faecalis OX	0.0193	0.721	2
tr|A0A318TD25|A0A318TD25_9BRAD	Alpha-1,4-glucan:maltose-1-phosphate maltosyltransferase OS	Rhodopseudomonas faecalis OX	0.03747	0.721105	1
tr|A0A318TC39|A0A318TC39_9BRAD	Tripartite-type tricarboxylate transporter receptor subunit TctC OS	Rhodopseudomonas faecalis OX	0.04704	0.721332	10
tr|A0A1G7MQH9|A0A1G7MQH9_RHOCA	NAD(P)-dependent dehydrogenase, short-chain alcohol dehydrogenase family OS	Rhodobacter capsulatus OX	0.08846	0.722105	2
tr|A0A318T6L8|A0A318T6L8_9BRAD	Glutaredoxin OS	Rhodopseudomonas faecalis OX	0.21141	0.724681	5
tr|A0A2T4JA45|A0A2T4JA45_RHOBL	Branched-chain amino acid ABC transporter substrate-binding protein OS	Rhodobacter blasticus DSM 2131 OX	0.31435	0.724917	8
tr|A0A318TI97|A0A318TI97_9BRAD	Acetyl-CoA C-acetyltransferase OS	Rhodopseudomonas faecalis OX	0.0008	0.72525	10
tr|A0A0Q0QSZ8|A0A0Q0QSZ8_RHOCA	50S ribosomal protein L20 OS	Rhodobacter capsulatus OX	0.20489	0.725948	2
tr|A0A318TE38|A0A318TE38_9BRAD	CubicO group peptidase (Beta-lactamase class C family) OS	Rhodopseudomonas faecalis OX	0.00172	0.727405	8
tr|A0A318TCG5|A0A318TCG5_9BRAD	Pimeloyl-ACP methyl ester carboxylesterase OS	Rhodopseudomonas faecalis OX	0.12044	0.727654	7
tr|A0A318TDL6|A0A318TDL6_9BRAD	Rhodanese-related sulfurtransferase OS	Rhodopseudomonas faecalis OX	0.02586	0.728155	8
tr|A0A318TH24|A0A318TH24_9BRAD	Thioesterase superfamily protein OS	Rhodopseudomonas faecalis OX	0.27338	0.728246	1
tr|A0A318TL56|A0A318TL56_9BRAD	Uncharacterized protein OS	Rhodopseudomonas faecalis OX	0.00499	0.729311	10
tr|A0A318TG42|A0A318TG42_9BRAD	Membrane fusion protein (Multidrug efflux system) OS	Rhodopseudomonas faecalis OX	0.04344	0.729962	7
tr|Q07LE5|Q07LE5_RHOP5	3-oxoacyl-[acyl-carrier-protein] reductase OS	Rhodopseudomonas palustris (strain BisA53) OX	0.24467	0.730346	1
tr|D5AUP5|D5AUP5_RHOCB	Hemolysin-type calcium-binding repeat family protein OS	Rhodobacter capsulatus (strain ATCC BAA-309 / NBRC 16581 / SB1003) OX	0.5256	0.730566	2
tr|A0A1G7FES7|A0A1G7FES7_RHOCA	Uncharacterized protein OS	Rhodobacter capsulatus OX	0.19277	0.730619	3
tr|A0A1G7HCY9|A0A1G7HCY9_RHOCA	Alanine--tRNA ligase OS	Rhodobacter capsulatus OX	0.36116	0.731248	1
tr|A0A318T737|A0A318T737_9BRAD	Flagellum-specific ATP synthase OS	Rhodopseudomonas faecalis OX	0.32953	0.731454	1
tr|D5ARW3|D5ARW3_RHOCB	TOBE domain protein OS	Rhodobacter capsulatus (strain ATCC BAA-309 / NBRC 16581 / SB1003) OX	0.41415	0.731952	1
tr|D5AUL5|D5AUL5_RHOCB	50S ribosomal protein L32 OS	Rhodobacter capsulatus (strain ATCC BAA-309 / NBRC 16581 / SB1003) OX	0.57996	0.73198	2
tr|A0A318TDP7|A0A318TDP7_9BRAD	Phosphonate transport system substrate-binding protein OS	Rhodopseudomonas faecalis OX	0.25663	0.732113	6
tr|A0A318T9Z5|A0A318T9Z5_9BRAD	tRNA pseudouridine synthase B OS	Rhodopseudomonas faecalis OX	0.13144	0.732426	2
tr|A0A318TDN3|A0A318TDN3_9BRAD	UDP-N-acetylmuramoyl-L-alanyl-D-glutamate--2,6-diaminopimelate ligase OS	Rhodopseudomonas faecalis OX	0.11862	0.733471	1
tr|A0A318TC67|A0A318TC67_9BRAD	Nitric oxide reductase NorQ protein OS	Rhodopseudomonas faecalis OX	0.50341	0.733742	10
tr|A0A2W5NJH0|A0A2W5NJH0_RHOSU	NAD(P) transhydrogenase subunit beta OS	Rhodovulum sulfidophilum OX	0.40343	0.733888	1
tr|A0A0Q0R1H2|A0A0Q0R1H2_RHOCA	Chlorophyllide a reductase iron protein subunit X OS	Rhodobacter capsulatus OX	0.29715	0.734728	2
tr|A0A318TPI8|A0A318TPI8_9BRAD	Uncharacterized protein OS	Rhodopseudomonas faecalis OX	0.18461	0.736124	2
tr|D5AKF9|D5AKF9_RHOCB	Thioredoxin OS	Rhodobacter capsulatus (strain ATCC BAA-309 / NBRC 16581 / SB1003) OX	0.69217	0.736278	2
tr|A0A318TFK1|A0A318TFK1_9BRAD	Iron(III) transport system substrate-binding protein OS	Rhodopseudomonas faecalis OX	0.09138	0.737262	7
tr|A0A318T7Y3|A0A318T7Y3_9BRAD	Putative lipid-binding transport protein (Tim44 family) OS	Rhodopseudomonas faecalis OX	0.08748	0.737288	4
tr|A0A318TD51|A0A318TD51_9BRAD	Phasin OS	Rhodopseudomonas faecalis OX	0.13782	0.739442	9
tr|A0A4U1JQF6|A0A4U1JQF6_RHOCA	Branched-chain amino acid ABC transporter substrate-binding protein OS	Rhodobacter capsulatus OX	0.7034	0.73975	1
tr|A0A318TT97|A0A318TT97_9BRAD	3-hydroxyisobutyrate dehydrogenase OS	Rhodopseudomonas faecalis OX	0.00556	0.740361	7
tr|A0A318TP38|A0A318TP38_9BRAD	CRISPR system Cascade subunit CasC OS	Rhodopseudomonas faecalis OX	0.18367	0.740565	1
tr|A0A2X2W9P0|A0A2X2W9P0_CITKO	Multifunctional fusion protein OS	Citrobacter koseri OX	0.24883	0.740743	4
tr|A0A318T8J9|A0A318T8J9_9BRAD	Aryl-alcohol dehydrogenase-like predicted oxidoreductase OS	Rhodopseudomonas faecalis OX	0.05719	0.740966	8
tr|A0A318TK60|A0A318TK60_9BRAD	Fatty-acyl-CoA synthase OS	Rhodopseudomonas faecalis OX	0.15908	0.741085	1
tr|A0A318TMH5|A0A318TMH5_9BRAD	Secreted protein OS	Rhodopseudomonas faecalis OX	0.00508	0.741712	10
tr|A0A2T4JCA7|A0A2T4JCA7_RHOBL	BMP family ABC transporter substrate-binding protein OS	Rhodobacter blasticus DSM 2131 OX	0.21859	0.742759	3
tr|A0A4U1JTS7|A0A4U1JTS7_RHOCA	ATP synthase epsilon chain OS	Rhodobacter capsulatus OX	0.54897	0.742949	3
tr|A0A1G7E2M5|A0A1G7E2M5_RHOCA	D-3-phosphoglycerate dehydrogenase OS	Rhodobacter capsulatus OX	0.54387	0.745836	1
tr|A0A318T755|A0A318T755_9BRAD	Glutathione S-transferase OS	Rhodopseudomonas faecalis OX	0.24312	0.74588	1
tr|A0A318TG34|A0A318TG34_9BRAD	D-methionine transport system substrate-binding protein OS	Rhodopseudomonas faecalis OX	0.39877	0.746259	9
tr|A0A318TG69|A0A318TG69_9BRAD	Hydroxymethylglutaryl-CoA lyase OS	Rhodopseudomonas faecalis OX	0.22017	0.747024	4
tr|Q6N799|Q6N799_RHOPA	Lipoprotein OS	Rhodopseudomonas palustris (strain ATCC BAA-98 / CGA009) OX	0.56231	0.747323	4
tr|A0A318TGE3|A0A318TGE3_9BRAD	2-octaprenyl-3-methyl-6-methoxy-1,4-benzoquinol hydroxylase OS	Rhodopseudomonas faecalis OX	0.03937	0.7478	10
tr|Q07HC5|Q07HC5_RHOP5	Peptidase U32 OS	Rhodopseudomonas palustris (strain BisA53) OX	0.19366	0.748623	1
tr|D5AM20|D5AM20_RHOCB	30S ribosomal protein S11 OS	Rhodobacter capsulatus (strain ATCC BAA-309 / NBRC 16581 / SB1003) OX	0.44108	0.748658	5
tr|A0A318U0J7|A0A318U0J7_9BRAD	Peptidase T OS	Rhodopseudomonas faecalis OX	0.09619	0.750082	1
tr|A0A318TLD5|A0A318TLD5_9BRAD	Putative phosphoglycerate mutase OS	Rhodopseudomonas faecalis OX	0.29838	0.750181	1
tr|A0A318TP56|A0A318TP56_9BRAD	Uncharacterized protein DUF3775 OS	Rhodopseudomonas faecalis OX	0.01512	0.75059	2
tr|A0A318TSJ3|A0A318TSJ3_9BRAD	NTE family protein OS	Rhodopseudomonas faecalis OX	0.00388	0.750592	1
tr|A0A0N8VFD2|A0A0N8VFD2_RHOCA	HemY protein OS	Rhodobacter capsulatus OX	0.47074	0.750601	1
tr|A0A1G7NNF5|A0A1G7NNF5_RHOCA	(2S)-methylsuccinyl-CoA dehydrogenase OS	Rhodobacter capsulatus OX	0.39196	0.751283	4
tr|A0A1H8QJL9|A0A1H8QJL9_9BRAD	Bacterioferritin OS	Rhodopseudomonas pseudopalustris OX	0.23418	0.752468	1
tr|D5AM09|D5AM09_RHOCB	30S ribosomal protein S8 OS	Rhodobacter capsulatus (strain ATCC BAA-309 / NBRC 16581 / SB1003) OX	0.22006	0.753198	6
tr|A0A318TJU7|A0A318TJU7_9BRAD	Polyphosphate kinase OS	Rhodopseudomonas faecalis OX	0.05441	0.753234	10
tr|A0A318TRU6|A0A318TRU6_9BRAD	MurNAc alpha-1-phosphate uridylyltransferase OS	Rhodopseudomonas faecalis OX	0.05632	0.753536	5
tr|A0A318TJZ5|A0A318TJZ5_9BRAD	Winged helix family two component transcriptional regulator OS	Rhodopseudomonas faecalis OX	0.05723	0.753868	3
tr|A0A318TID8|A0A318TID8_9BRAD	DD-transpeptidase OS	Rhodopseudomonas faecalis OX	0.39609	0.754166	1
tr|A0A318TB03|A0A318TB03_9BRAD	Putative nicotinamide N-methyase OS	Rhodopseudomonas faecalis OX	0.14779	0.754322	1
tr|A0A318TR27|A0A318TR27_9BRAD	Molybdopterin molybdenumtransferase OS	Rhodopseudomonas faecalis OX	0.22339	0.755699	5
tr|A0A318T8G1|A0A318T8G1_9BRAD	L,D-transpeptidase-like protein OS	Rhodopseudomonas faecalis OX	0.4517	0.755847	2
tr|A0A318THM8|A0A318THM8_9BRAD	Gamma-glutamylcyclotransferase family protein OS	Rhodopseudomonas faecalis OX	0.16344	0.756483	1
tr|A0A1G7IVJ8|A0A1G7IVJ8_RHOCA	Propionyl-CoA carboxylase OS	Rhodobacter capsulatus OX	0.44274	0.756679	6
tr|A0A0Q0WGA1|A0A0Q0WGA1_RHOCA	Electron transfer flavoprotein beta subunit OS	Rhodobacter capsulatus OX	0.49358	0.759243	5
tr|A0A318TBT0|A0A318TBT0_9BRAD	Response regulator receiver domain-containing protein OS	Rhodopseudomonas faecalis OX	0.10632	0.759552	9
tr|C8S095|C8S095_9RHOB	Putrescine-binding periplasmic protein OS	Rhodobacter sp. SW2 OX	0.30092	0.76145	1
tr|A0A2T4J5X1|A0A2T4J5X1_RHOBL	Peptide ABC transporter OS	Rhodobacter blasticus DSM 2131 OX	0.35539	0.763086	4
tr|A0A318TES2|A0A318TES2_9BRAD	DNA helicase/exodeoxyribonuclease V subunit B OS	Rhodopseudomonas faecalis OX	0.53133	0.763279	3
tr|A0A318TR67|A0A318TR67_9BRAD	Putative ABC transport system ATP-binding protein OS	Rhodopseudomonas faecalis OX	0.2639	0.763366	6
tr|A0A4U1JNL8|A0A4U1JNL8_RHOCA	Phosphoribulokinase OS	Rhodobacter capsulatus OX	0.39444	0.764471	1
tr|D5AMB8|D5AMB8_RHOCB	Proline--tRNA ligase OS	Rhodobacter capsulatus (strain ATCC BAA-309 / NBRC 16581 / SB1003) OX	0.4974	0.76479	1
tr|D5ALE0|D5ALE0_RHOCB	Uncharacterized protein OS	Rhodobacter capsulatus (strain ATCC BAA-309 / NBRC 16581 / SB1003) OX	0.58939	0.765314	1
tr|A0A2T4JDT6|A0A2T4JDT6_RHOBL	Spermidine/putrescine ABC transporter substrate-binding protein OS	Rhodobacter blasticus DSM 2131 OX	0.36898	0.76545	1
tr|A0A318T6F2|A0A318T6F2_9BRAD	Acetyl-CoA synthetase OS	Rhodopseudomonas faecalis OX	0.28364	0.765542	5
tr|A0A1G7FW81|A0A1G7FW81_RHOCA	30S ribosomal protein S17 OS	Rhodobacter capsulatus OX	0.409	0.765774	3
tr|A0A318T9I4|A0A318T9I4_9BRAD	Acetolactate synthase OS	Rhodopseudomonas faecalis OX	0.10913	0.765896	10
tr|A0A318TLL4|A0A318TLL4_9BRAD	NifU-like protein involved in Fe-S cluster formation OS	Rhodopseudomonas faecalis OX	0.14493	0.766029	5
tr|A0A318TAU6|A0A318TAU6_9BRAD	4-alpha-glucanotransferase OS	Rhodopseudomonas faecalis OX	0.02268	0.766073	3
tr|A0A318TNU0|A0A318TNU0_9BRAD	Diguanylate cyclase OS	Rhodopseudomonas faecalis OX	0.37586	0.766374	2
tr|A0A318TIK0|A0A318TIK0_9BRAD	Amino acid/amide ABC transporter substrate-binding protein (HAAT family) OS	Rhodopseudomonas faecalis OX	0.14616	0.766531	10
tr|A0A1G7HQU6|A0A1G7HQU6_RHOCA	Fructose-bisphosphate aldolase class I OS	Rhodobacter capsulatus OX	0.4223	0.766626	8
tr|A0A318U2V8|A0A318U2V8_9RHOB	30S ribosomal protein S7 OS	Rhodobacter viridis OX	0.47787	0.76688	2
tr|A0A318TGI4|A0A318TGI4_9BRAD	Transcriptional repressor NrdR OS	Rhodopseudomonas faecalis OX	0.14597	0.767122	2
tr|A0A318T9C4|A0A318T9C4_9BRAD	Protein HflK OS	Rhodopseudomonas faecalis OX	0.06381	0.769175	10
tr|A0A318TAQ0|A0A318TAQ0_9BRAD	GreA/GreB family elongation factor OS	Rhodopseudomonas faecalis OX	0.28888	0.769237	4
tr|A0A318THY6|A0A318THY6_9BRAD	Uncharacterized protein OS	Rhodopseudomonas faecalis OX	0.15219	0.769476	5
tr|A0A0Q0QGS9|A0A0Q0QGS9_RHOCA	50S ribosomal protein L18 OS	Rhodobacter capsulatus OX	0.4983	0.769561	2
tr|A0A1G7GLB7|A0A1G7GLB7_RHOCA	Beta-methylmalyl-CoA dehydratase OS	Rhodobacter capsulatus OX	0.25958	0.770014	2
tr|A0A4U1JRA0|A0A4U1JRA0_RHOCA	4-hydroxy-3-methylbut-2-en-1-yl diphosphate synthase (flavodoxin) OS	Rhodobacter capsulatus OX	0.42931	0.770563	1
tr|A0A318T7U2|A0A318T7U2_9BRAD	Transposase OS	Rhodopseudomonas faecalis OX	0.55232	0.771836	2
tr|F8X0H2|F8X0H2_9BACT	Elongation factor Ts OS	Dysgonomonas mossii DSM 22836 OX	0.378	0.772954	2
tr|A0A318TBK9|A0A318TBK9_9BRAD	RNA polymerase sigma factor OS	Rhodopseudomonas faecalis OX	0.19353	0.772996	8
tr|A0A318TBJ4|A0A318TBJ4_9BRAD	DNA helicase OS	Rhodopseudomonas faecalis OX	0.13711	0.773578	3
tr|D5ALZ8|D5ALZ8_RHOCB	30S ribosomal protein S19 OS	Rhodobacter capsulatus (strain ATCC BAA-309 / NBRC 16581 / SB1003) OX	0.69835	0.773594	1
tr|A0A318TDG0|A0A318TDG0_9BRAD	Poly(3-hydroxybutyrate) depolymerase OS	Rhodopseudomonas faecalis OX	0.06832	0.773884	10
tr|A0A318T8A2|A0A318T8A2_9BRAD	Carbon-monoxide dehydrogenase medium subunit OS	Rhodopseudomonas faecalis OX	0.0089	0.773924	4
tr|A0A318TAN8|A0A318TAN8_9BRAD	Amino acid/amide ABC transporter substrate-binding protein (HAAT family) OS	Rhodopseudomonas faecalis OX	0.24095	0.773947	9
tr|A0A318T729|A0A318T729_9BRAD	Carbon-monoxide dehydrogenase small subunit OS	Rhodopseudomonas faecalis OX	0.01585	0.773963	6
tr|A0A318T865|A0A318T865_9BRAD	Anti-sigma-K factor rskA OS	Rhodopseudomonas faecalis OX	0.1739	0.774051	2
tr|A0A0Q0QUZ8|A0A0Q0QUZ8_RHOCA	ATP synthase subunit beta OS	Rhodobacter capsulatus OX	0.66152	0.775312	9
tr|A0A6G8UTI0|A0A6G8UTI0_9ENTR	ATP synthase subunit alpha OS	Citrobacter sp. Y3 OX	0.55502	0.775458	4
tr|Q3J036|Q3J036_RHOS4	Uncharacterized protein OS	Rhodobacter sphaeroides (strain ATCC 17023 / 2.4.1 / NCIB 8253 / DSM 158) OX	0.21242	0.775507	2
tr|A0A1G7JIL5|A0A1G7JIL5_RHOCA	Metal-dependent carboxypeptidase OS	Rhodobacter capsulatus OX	0.49023	0.775609	1
tr|A0A318TK36|A0A318TK36_9BRAD	Putative sulfurylase large subunit (Molybdopterin cytosine dinucleotide biosynthesis) OS	Rhodopseudomonas faecalis OX	0.08092	0.775989	1
tr|A0A318TMI9|A0A318TMI9_9BRAD	Acetolactate synthase-1/2/3 large subunit OS	Rhodopseudomonas faecalis OX	0.61982	0.776319	1
tr|A0A318TJA4|A0A318TJA4_9BRAD	Beta-glucosidase OS	Rhodopseudomonas faecalis OX	0.05614	0.776491	8
tr|A0A4Y9IKE3|A0A4Y9IKE3_9BACT	TPR_REGION domain-containing protein OS	Dysgonomonas mossii OX	0.17729	0.777231	3
tr|A0A1G7MPV7|A0A1G7MPV7_RHOCA	ATP synthase subunit alpha OS	Rhodobacter capsulatus OX	0.64548	0.778845	10
tr|A0A318TQ10|A0A318TQ10_9BRAD	FAD/FMN-containing dehydrogenase OS	Rhodopseudomonas faecalis OX	0.25801	0.778981	1
tr|A0A318TKU4|A0A318TKU4_9BRAD	Protease HtpX homolog OS	Rhodopseudomonas faecalis OX	0.00798	0.779188	5
tr|A0A318TI86|A0A318TI86_9BRAD	Short chain enoyl-CoA hydratase /3-hydroxyacyl-CoA dehydrogenase OS	Rhodopseudomonas faecalis OX	0.00157	0.77928	10
tr|A0A2T4JE08|A0A2T4JE08_RHOBL	Type I-E CRISPR-associated protein Cas7/Cse4/CasC OS	Rhodobacter blasticus DSM 2131 OX	0.24074	0.780189	3
tr|A0A2T4J8B3|A0A2T4J8B3_RHOBL	Sugar ABC transporter OS	Rhodobacter blasticus DSM 2131 OX	0.21318	0.780468	2
tr|A0A318TQL9|A0A318TQL9_9BRAD	NAD(P)-dependent dehydrogenase (Short-subunit alcohol dehydrogenase family) OS	Rhodopseudomonas faecalis OX	0.09846	0.780496	2
tr|Q20Z17|Q20Z17_RHOPB	Cys-tRNA(Pro)/Cys-tRNA(Cys) deacylase OS	Rhodopseudomonas palustris (strain BisB18) OX	0.34488	0.781073	2
tr|A0A318TIG5|A0A318TIG5_9BRAD	Pimeloyl-ACP methyl ester carboxylesterase OS	Rhodopseudomonas faecalis OX	0.01434	0.782105	1
tr|A0A318TNB7|A0A318TNB7_9BRAD	Amino acid/amide ABC transporter ATP-binding protein 2 (HAAT family) OS	Rhodopseudomonas faecalis OX	0.12744	0.782252	7
tr|A0A318THZ4|A0A318THZ4_9BRAD	PKS_ER domain-containing protein OS	Rhodopseudomonas faecalis OX	0.01427	0.782718	4
tr|A0A318TBD8|A0A318TBD8_9BRAD	3-hydroxyacyl-CoA dehydrogenase OS	Rhodopseudomonas faecalis OX	0.01935	0.783293	5
tr|D5AM03|D5AM03_RHOCB	50S ribosomal protein L29 OS	Rhodobacter capsulatus (strain ATCC BAA-309 / NBRC 16581 / SB1003) OX	0.62655	0.7834	1
tr|A0A2T4JBL9|A0A2T4JBL9_RHOBL	Fructose-1,6-bisphosphate aldolase OS	Rhodobacter blasticus DSM 2131 OX	0.46681	0.783613	1
tr|A0A318TEU7|A0A318TEU7_9BRAD	Protein adenylyltransferase SelO OS	Rhodopseudomonas faecalis OX	0.05493	0.78367	2
tr|A0A318T8B7|A0A318T8B7_9BRAD	Glyoxylate reductase OS	Rhodopseudomonas faecalis OX	0.02638	0.785028	6
tr|A0A318THD6|A0A318THD6_9BRAD	Squalene-hopene/tetraprenyl-beta-curcumene cyclase OS	Rhodopseudomonas faecalis OX	0.1745	0.785228	7
tr|A0A318TTS6|A0A318TTS6_9BRAD	Uncharacterized protein OS	Rhodopseudomonas faecalis OX	0.01265	0.785651	1
tr|A0A318TRH0|A0A318TRH0_9BRAD	Glycogen synthase OS	Rhodopseudomonas faecalis OX	0.01862	0.786137	3
tr|A0A318T916|A0A318T916_9BRAD	Uncharacterized protein OS	Rhodopseudomonas faecalis OX	0.05094	0.786389	7
tr|D5AVB9|D5AVB9_RHOCB	Uncharacterized protein OS	Rhodobacter capsulatus (strain ATCC BAA-309 / NBRC 16581 / SB1003) OX	0.38567	0.78705	1
tr|A0A318TAU9|A0A318TAU9_9BRAD	Trehalose 6-phosphate synthase OS	Rhodopseudomonas faecalis OX	0.17802	0.787725	1
tr|D5ANF9|D5ANF9_RHOCB	BolA family protein OS	Rhodobacter capsulatus (strain ATCC BAA-309 / NBRC 16581 / SB1003) OX	0.5085	0.788226	1
tr|A0A318TBR0|A0A318TBR0_9BRAD	BolA protein family transcriptional regulator OS	Rhodopseudomonas faecalis OX	0.51387	0.788958	1
tr|A0A2R4GW28|A0A2R4GW28_RHOPL	Uncharacterized protein OS	Rhodopseudomonas palustris OX	0.73702	0.789537	1
tr|A0A318TQ38|A0A318TQ38_9BRAD	Fatty-acyl-CoA synthase OS	Rhodopseudomonas faecalis OX	0.0732	0.789683	10
tr|A0A318TBI4|A0A318TBI4_9BRAD	MoxR-like ATPase OS	Rhodopseudomonas faecalis OX	0.00787	0.789921	5
tr|D5APC0|D5APC0_RHOCB	Citrate lyase, beta subunit-1 OS	Rhodobacter capsulatus (strain ATCC BAA-309 / NBRC 16581 / SB1003) OX	0.68757	0.790828	1
tr|A0A318TCR8|A0A318TCR8_9BRAD	Uncharacterized protein OS	Rhodopseudomonas faecalis OX	0.30762	0.790918	2
tr|A0A4U1JSY2|A0A4U1JSY2_RHOCA	3-oxoacyl-[acyl-carrier-protein] synthase 2 OS	Rhodobacter capsulatus OX	0.65104	0.791983	1
tr|A0A318TQJ3|A0A318TQJ3_9BRAD	Enoyl-CoA hydratase/carnithine racemase OS	Rhodopseudomonas faecalis OX	0.0024	0.792188	5
tr|A0A318TD12|A0A318TD12_9BRAD	Glutathione peroxidase OS	Rhodopseudomonas faecalis OX	0.00802	0.792488	5
tr|A0A2T4J4Z7|A0A2T4J4Z7_RHOBL	Photosynthetic reaction center subunit H OS	Rhodobacter blasticus DSM 2131 OX	0.42394	0.792688	2
tr|A0A1G7BVW2|A0A1G7BVW2_RHOCA	3-oxoacyl-[acyl-carrier-protein] reductase /acetoacetyl-CoA reductase OS	Rhodobacter capsulatus OX	0.61952	0.792689	4
tr|A0A318TDS9|A0A318TDS9_9BRAD	Glycolate oxidase iron-sulfur subunit OS	Rhodopseudomonas faecalis OX	0.00554	0.794336	3
tr|A0A318T8B3|A0A318T8B3_9BRAD	Ribulose bisphosphate carboxylase large chain OS	Rhodopseudomonas faecalis OX	0.65489	0.796044	6
tr|A0A318TQ32|A0A318TQ32_9BRAD	Trans-aconitate 2-methyltransferase OS	Rhodopseudomonas faecalis OX	0.03225	0.79734	3
tr|A0A318TG96|A0A318TG96_9BRAD	NAD(P)H-dependent FMN reductase OS	Rhodopseudomonas faecalis OX	0.28783	0.798131	4
tr|D5AT61|D5AT61_RHOCB	Uncharacterized protein OS	Rhodobacter capsulatus (strain ATCC BAA-309 / NBRC 16581 / SB1003) OX	0.66165	0.798368	1
tr|A0A318TKH3|A0A318TKH3_9BRAD	Acetyl-CoA synthetase OS	Rhodopseudomonas faecalis OX	0.00919	0.799233	9
tr|A0A318TBV1|A0A318TBV1_9BRAD	NADH dehydrogenase subunit F OS	Rhodopseudomonas faecalis OX	0.16555	0.799658	2
tr|A0A318TSQ0|A0A318TSQ0_9BRAD	Ferritin-like metal-binding protein YciE OS	Rhodopseudomonas faecalis OX	0.25869	0.799873	2
tr|A0A0Q0QTW5|A0A0Q0QTW5_RHOCA	Putative spermidine/putrescine transport system substrate-binding protein OS	Rhodobacter capsulatus OX	0.57914	0.799928	1
tr|A0A1G7CFJ4|A0A1G7CFJ4_RHOCA	Branched-chain amino acid transport system substrate-binding protein OS	Rhodobacter capsulatus OX	0.42902	0.799929	2
tr|A0A318TMR8|A0A318TMR8_9BRAD	von Willebrand factor type A domain-containing protein OS	Rhodopseudomonas faecalis OX	0.51313	0.802088	10
tr|Q6IVV3|Q6IVV3_RHOCA	Delta-aminolevulinic acid dehydratase OS	Rhodobacter capsulatus OX	0.3332	0.802433	2
tr|A0A318TU72|A0A318TU72_9BRAD	5-methyltetrahydropteroyltriglutamate--homocysteine methyltransferase OS	Rhodopseudomonas faecalis OX	0.4033	0.803031	10
tr|A0A0J9E309|A0A0J9E309_9RHOB	30S ribosomal protein S10 OS	Candidatus Rhodobacter lobularis OX	0.63624	0.803444	2
tr|F8WVT7|F8WVT7_9BACT	30S ribosomal protein S14 OS	Dysgonomonas mossii DSM 22836 OX	0.61809	0.803604	1
tr|A0A318TEL2|A0A318TEL2_9BRAD	Homospermidine synthase OS	Rhodopseudomonas faecalis OX	0.15484	0.804085	9
tr|A0A1G7BZN3|A0A1G7BZN3_RHOCA	4-aminobutyrate aminotransferase OS	Rhodobacter capsulatus OX	0.34245	0.804425	3
tr|A0A318TL37|A0A318TL37_9BRAD	Riboflavin synthase alpha chain OS	Rhodopseudomonas faecalis OX	0.28288	0.805295	3
tr|A0A318TAP6|A0A318TAP6_9BRAD	Amino acid/amide ABC transporter substrate-binding protein (HAAT family) OS	Rhodopseudomonas faecalis OX	0.11797	0.807306	10
tr|A0A318TAE8|A0A318TAE8_9BRAD	Acyl dehydratase OS	Rhodopseudomonas faecalis OX	0.06079	0.808662	2
tr|A0A318TLU6|A0A318TLU6_9BRAD	Enoyl-CoA hydratase OS	Rhodopseudomonas faecalis OX	0.19035	0.808704	3
tr|A0A318TM82|A0A318TM82_9BRAD	Formyl-CoA:oxalate CoA-transferase OS	Rhodopseudomonas faecalis OX	0.16045	0.809261	7
tr|A0A1G7L5P8|A0A1G7L5P8_RHOCA	Protein translocase subunit SecA OS	Rhodobacter capsulatus OX	0.26125	0.810041	1
tr|A0A318TQ94|A0A318TQ94_9BRAD	Chromosome partition protein Smc OS	Rhodopseudomonas faecalis OX	0.23901	0.810576	7
tr|A0A318U761|A0A318U761_9RHOB	30S ribosomal protein S18 OS	Rhodobacter viridis OX	0.65575	0.810729	1
tr|A0A4U1JRP9|A0A4U1JRP9_RHOCA	Peptidoglycan-associated protein OS	Rhodobacter capsulatus OX	0.63965	0.811431	1
tr|A0A318TKJ8|A0A318TKJ8_9BRAD	2-octaprenyl-6-methoxyphenol hydroxylase /2-octaprenyl-3-methyl-6-methoxy-1,4-benzoquinol hydroxylase OS	Rhodopseudomonas faecalis OX	0.09546	0.811599	8
tr|A0A318T8J2|A0A318T8J2_9BRAD	Acetolactate synthase-1/2/3 large subunit OS	Rhodopseudomonas faecalis OX	0.35367	0.811751	2
tr|A0A318TFH0|A0A318TFH0_9BRAD	Deoxyribodipyrimidine photo-lyase type I OS	Rhodopseudomonas faecalis OX	0.31176	0.812231	1
tr|A0A0Q0QM60|A0A0Q0QM60_RHOCA	30S ribosomal protein S6 OS	Rhodobacter capsulatus OX	0.728	0.812649	3
tr|A0A318TC98|A0A318TC98_9BRAD	Superoxide dismutase [Cu-Zn] OS	Rhodopseudomonas faecalis OX	0.0785	0.812749	3
tr|A0A285S528|A0A285S528_9RHOB	Cytochrome c556 OS	Rhodobacter maris OX	0.72047	0.812822	1
tr|A0A0Q0QTT8|A0A0Q0QTT8_RHOCA	Anaerobic Mg-protoporphyrin IX monomethyl ester oxidative cyclase OS	Rhodobacter capsulatus OX	0.50209	0.813521	1
tr|A0A318THZ8|A0A318THZ8_9BRAD	Dihydroorotase OS	Rhodopseudomonas faecalis OX	0.12873	0.813738	9
tr|A0A318TTG2|A0A318TTG2_9BRAD	Uncharacterized protein DUF4164 OS	Rhodopseudomonas faecalis OX	0.29028	0.815115	2
tr|A0A318TFD2|A0A318TFD2_9BRAD	Phasin OS	Rhodopseudomonas faecalis OX	0.06595	0.815272	10
tr|A0A1G7K0G2|A0A1G7K0G2_RHOCA	Uncharacterized protein OS	Rhodobacter capsulatus OX	0.54578	0.815484	4
tr|D5AR44|D5AR44_RHOCB	Heavy metal transport/detoxification protein family OS	Rhodobacter capsulatus (strain ATCC BAA-309 / NBRC 16581 / SB1003) OX	0.36035	0.815793	1
tr|A0A0Q0W7Q2|A0A0Q0W7Q2_RHOCA	50S ribosomal protein L7/L12 OS	Rhodobacter capsulatus OX	0.65738	0.815927	7
tr|A0A318T6V2|A0A318T6V2_9BRAD	O-acetyl-ADP-ribose deacetylase (Regulator of RNase III) OS	Rhodopseudomonas faecalis OX	0.07586	0.815961	1
tr|A0A1G7GGD2|A0A1G7GGD2_RHOCA	Phytoene desaturase OS	Rhodobacter capsulatus OX	0.50887	0.815968	1
tr|D5AQJ7|D5AQJ7_RHOCB	Fructose-1,6-bisphosphatase OS	Rhodobacter capsulatus (strain ATCC BAA-309 / NBRC 16581 / SB1003) OX	0.50265	0.816114	5
tr|A0A318TKY7|A0A318TKY7_9BRAD	NTE family protein OS	Rhodopseudomonas faecalis OX	0.21751	0.817502	6
tr|A0A2T4JEJ2|A0A2T4JEJ2_RHOBL	Phosphonate ABC transporter substrate-binding protein OS	Rhodobacter blasticus DSM 2131 OX	0.53811	0.821245	2
sp|P86319|CYC2_RHOBL	Cytochrome c2 OS	Rhodobacter blasticus OX	0.53929	0.821512	3
tr|A0A0Q0WFH7|A0A0Q0WFH7_RHOCA	Sec-independent protein translocase protein TatA OS	Rhodobacter capsulatus OX	0.69361	0.822384	1
tr|A0A318TGY8|A0A318TGY8_9BRAD	PRC-barrel domain protein OS	Rhodopseudomonas faecalis OX	0.53494	0.82338	1
tr|A0A323UNL6|A0A323UNL6_RHOPL	Methylmalonate-semialdehyde dehydrogenase (CoA acylating) OS	Rhodopseudomonas palustris OX	0.06448	0.823408	1
tr|D5ARK7|D5ARK7_RHOCB	S-adenosylmethionine synthase OS	Rhodobacter capsulatus (strain ATCC BAA-309 / NBRC 16581 / SB1003) OX	0.59679	0.823441	8
tr|A0A318TDV9|A0A318TDV9_9BRAD	1-hydroxycarotenoid 3,4-desaturase OS	Rhodopseudomonas faecalis OX	0.30316	0.825182	2
tr|A0A212PYL2|A0A212PYL2_RHOAC	Cystathionine gamma-lyase OS	Rhodoblastus acidophilus OX	0.62678	0.825384	2
tr|A0A318TI56|A0A318TI56_9BRAD	Papain like protease OS	Rhodopseudomonas faecalis OX	0.29781	0.825459	1
tr|A0A4Y8L7E6|A0A4Y8L7E6_9BACT	Elongation factor Tu OS	Dysgonomonas capnocytophagoides OX	0.59437	0.826257	1
tr|A0A318TGZ8|A0A318TGZ8_9BRAD	Electron transfer flavoprotein beta subunit OS	Rhodopseudomonas faecalis OX	0.05058	0.82653	10
tr|A0A318TL96|A0A318TL96_9BRAD	Triosephosphate isomerase OS	Rhodopseudomonas faecalis OX	0.15575	0.826665	8
tr|A0A1G7BXN6|A0A1G7BXN6_RHOCA	Beta-methylmalyl-CoA/L-malyl-CoA lyase OS	Rhodobacter capsulatus OX	0.42053	0.827581	3
tr|A0A0Q0QGF8|A0A0Q0QGF8_RHOCA	Glyoxylate reductase OS	Rhodobacter capsulatus OX	0.55851	0.82781	1
tr|D5ARG1|D5ARG1_RHOCB	Uncharacterized protein OS	Rhodobacter capsulatus (strain ATCC BAA-309 / NBRC 16581 / SB1003) OX	0.5392	0.82852	3
tr|A0A318TGP4|A0A318TGP4_9BRAD	Crp/Fnr family transcriptional regulator OS	Rhodopseudomonas faecalis OX	0.07485	0.828677	4
tr|A0A318T9V3|A0A318T9V3_9BRAD	Sulfate thiol esterase SoxB OS	Rhodopseudomonas faecalis OX	0.15928	0.829794	4
tr|Q07UL0|Q07UL0_RHOP5	RNA binding S1 domain protein OS	Rhodopseudomonas palustris (strain BisA53) OX	0.60327	0.829838	1
tr|A0A318TA66|A0A318TA66_9BRAD	3-oxoacyl-[acyl-carrier-protein] reductase /acetoacetyl-CoA reductase OS	Rhodopseudomonas faecalis OX	0.0009	0.830473	7
tr|A0A318TIY1|A0A318TIY1_9BRAD	Amino acid/amide ABC transporter substrate-binding protein (HAAT family) OS	Rhodopseudomonas faecalis OX	0.40976	0.831257	9
tr|A0A318TTA6|A0A318TTA6_9BRAD	Glutathione reductase OS	Rhodopseudomonas faecalis OX	0.22709	0.832708	4
tr|A0A318TDR6|A0A318TDR6_9BRAD	L-amino acid N-acyltransferase YncA OS	Rhodopseudomonas faecalis OX	0.14834	0.832795	2
tr|A0A1G7JJX4|A0A1G7JJX4_RHOCA	Triosephosphate isomerase OS	Rhodobacter capsulatus OX	0.4807	0.833016	2
tr|A0A318TAD2|A0A318TAD2_9BRAD	Uncharacterized protein OS	Rhodopseudomonas faecalis OX	0.11104	0.83336	10
tr|A0A318TSS8|A0A318TSS8_9BRAD	Amidohydrolase OS	Rhodopseudomonas faecalis OX	0.06761	0.833849	10
tr|A0A318TAB0|A0A318TAB0_9BRAD	Sulfide:quinone oxidoreductase OS	Rhodopseudomonas faecalis OX	0.2189	0.834056	6
tr|A0A318TJC3|A0A318TJC3_9BRAD	ATP diphosphatase OS	Rhodopseudomonas faecalis OX	0.14066	0.834245	5
tr|A0A318TCN6|A0A318TCN6_9BRAD	Hydroxyneurosporene synthase OS	Rhodopseudomonas faecalis OX	0.23655	0.836625	2
tr|A0A318TJ62|A0A318TJ62_9BRAD	Acetyl-coenzyme A synthetase OS	Rhodopseudomonas faecalis OX	0.10778	0.836713	10
tr|A0A318TC69|A0A318TC69_9BRAD	CRISPR-associated Csd2 family protein OS	Rhodopseudomonas faecalis OX	0.2294	0.837422	10
tr|A0A318TBB6|A0A318TBB6_9BRAD	Uncharacterized protein OS	Rhodopseudomonas faecalis OX	0.01414	0.837609	2
tr|A0A318TJT0|A0A318TJT0_9BRAD	Short chain enoyl-CoA hydratase OS	Rhodopseudomonas faecalis OX	0.04991	0.838387	10
tr|A0A318U0V8|A0A318U0V8_9BRAD	Light-harvesting protein B-800-850 beta chain OS	Rhodopseudomonas faecalis OX	0.58057	0.839696	1
tr|A0A0N8VFT4|A0A0N8VFT4_RHOCA	Photosynthetic reaction center H subunit OS	Rhodobacter capsulatus OX	0.69557	0.839791	7
tr|A0A318TBV4|A0A318TBV4_9BRAD	Heat-inducible transcription repressor HrcA OS	Rhodopseudomonas faecalis OX	0.19759	0.839956	3
tr|A0A318TF42|A0A318TF42_9BRAD	Uncharacterized protein DUF4261 OS	Rhodopseudomonas faecalis OX	0.20377	0.84005	3
tr|A0A318TM45|A0A318TM45_9BRAD	Putative phiE125 gp8 family phage protein OS	Rhodopseudomonas faecalis OX	0.55781	0.841674	2
tr|D5AM21|D5AM21_RHOCB	DNA-directed RNA polymerase subunit alpha OS	Rhodobacter capsulatus (strain ATCC BAA-309 / NBRC 16581 / SB1003) OX	0.73184	0.841979	1
tr|A0A318TNB8|A0A318TNB8_9BRAD	Methylmalonate-semialdehyde dehydrogenase [acylating] OS	Rhodopseudomonas faecalis OX	0.06891	0.842022	8
tr|Q213G4|Q213G4_RHOPB	Transposase IS3/IS911 OS	Rhodopseudomonas palustris (strain BisB18) OX	0.44889	0.842229	1
tr|A0A318TMW8|A0A318TMW8_9BRAD	LuxR family two component transcriptional regulator OS	Rhodopseudomonas faecalis OX	0.09195	0.842612	7
tr|A0A318TK50|A0A318TK50_9BRAD	Iron-sulfur cluster assembly protein OS	Rhodopseudomonas faecalis OX	0.66003	0.84276	2
tr|A0A318TMK5|A0A318TMK5_9BRAD	Amino acid/amide ABC transporter ATP-binding protein 2 (HAAT family) OS	Rhodopseudomonas faecalis OX	0.37131	0.842857	4
tr|A0A1N7KFI3|A0A1N7KFI3_9RHOB	Acetylglutamate kinase OS	Rhodobacter aestuarii OX	0.59929	0.843242	1
tr|A0A1G7DBC1|A0A1G7DBC1_RHOCA	Transketolase OS	Rhodobacter capsulatus OX	0.67643	0.844167	2
tr|A0A4U1JS31|A0A4U1JS31_RHOCA	DNA-directed RNA polymerase subunit beta' OS	Rhodobacter capsulatus OX	0.39129	0.844216	3
tr|A0A285D4B0|A0A285D4B0_9RHOB	HlyD family secretion protein OS	Rhodobacter ovatus OX	0.45224	0.844271	1
tr|A0A318TR66|A0A318TR66_9BRAD	Nucleotide-binding universal stress UspA family protein OS	Rhodopseudomonas faecalis OX	0.33693	0.84448	3
tr|A0A1G7RPM0|A0A1G7RPM0_RHOCA	Superoxide dismutase OS	Rhodobacter capsulatus OX	0.6104	0.844507	2
tr|A0A318T8P5|A0A318T8P5_9BRAD	Corrinoid adenosyltransferase OS	Rhodopseudomonas faecalis OX	0.35003	0.845301	4
tr|A0A318TKV9|A0A318TKV9_9BRAD	NADP-dependent 3-hydroxy acid dehydrogenase YdfG OS	Rhodopseudomonas faecalis OX	0.35804	0.84623	4
tr|A0A1G7KL63|A0A1G7KL63_RHOCA	Polar amino acid transport system substrate-binding protein OS	Rhodobacter capsulatus OX	0.77311	0.846386	1
tr|A0A318TMB0|A0A318TMB0_9BRAD	Enamine deaminase RidA (YjgF/YER057c/UK114 family) OS	Rhodopseudomonas faecalis OX	0.09061	0.84647	2
tr|A0A318TNC9|A0A318TNC9_9BRAD	3-hydroxyisobutyrate dehydrogenase OS	Rhodopseudomonas faecalis OX	0.11823	0.846558	6
tr|D5ATD8|D5ATD8_RHOCB	Flagellin OS	Rhodobacter capsulatus (strain ATCC BAA-309 / NBRC 16581 / SB1003) OX	0.37455	0.846966	9
tr|A0A0Q0UFJ2|A0A0Q0UFJ2_RHOCA	50S ribosomal protein L31 OS	Rhodobacter capsulatus OX	0.3728	0.847173	2
tr|A0A318T9N4|A0A318T9N4_9BRAD	Protein HflC OS	Rhodopseudomonas faecalis OX	0.11858	0.847439	9
tr|A0A318TFL1|A0A318TFL1_9BRAD	Spermidine/putrescine import ATP-binding protein PotA OS	Rhodopseudomonas faecalis OX	0.20737	0.848042	10
tr|A0A318TFB8|A0A318TFB8_9BRAD	Ribonuclease R OS	Rhodopseudomonas faecalis OX	0.13633	0.848369	1
tr|A0A318TKF3|A0A318TKF3_9BRAD	Uncharacterized protein OS	Rhodopseudomonas faecalis OX	0.63518	0.848453	1
tr|A0A318TC87|A0A318TC87_9BRAD	Chaperone protein ClpB OS	Rhodopseudomonas faecalis OX	0.14112	0.848469	10
tr|A0A2T4JCB1|A0A2T4JCB1_RHOBL	Multifunctional 2',3'-cyclic-nucleotide 2'-phosphodiesterase/5'-nucleotidase/3'-nucleotidase OS	Rhodobacter blasticus DSM 2131 OX	0.5558	0.848629	1
tr|D5AM05|D5AM05_RHOCB	50S ribosomal protein L14 OS	Rhodobacter capsulatus (strain ATCC BAA-309 / NBRC 16581 / SB1003) OX	0.6778	0.848678	1
tr|A0A318TBZ1|A0A318TBZ1_9BRAD	Acetolactate synthase OS	Rhodopseudomonas faecalis OX	0.17477	0.849847	10
tr|Q20X29|Q20X29_RHOPB	Uncharacterized protein OS	Rhodopseudomonas palustris (strain BisB18) OX	0.14384	0.850557	1
tr|Q21D87|Q21D87_RHOPB	Succinate dehydrogenase flavoprotein subunit OS	Rhodopseudomonas palustris (strain BisB18) OX	0.43523	0.85269	3
tr|A0A318TQH1|A0A318TQH1_9BRAD	PPK2 family polyphosphate:nucleotide phosphotransferase OS	Rhodopseudomonas faecalis OX	0.18311	0.852709	1
tr|D5ANB1|D5ANB1_RHOCB	Elongation factor P OS	Rhodobacter capsulatus (strain ATCC BAA-309 / NBRC 16581 / SB1003) OX	0.67796	0.852803	3
tr|A0A2T4JBZ6|A0A2T4JBZ6_RHOBL	Ubiquinol-cytochrome c reductase iron-sulfur subunit OS	Rhodobacter blasticus DSM 2131 OX	0.61048	0.853284	1
tr|A0A318TIQ7|A0A318TIQ7_9BRAD	Secondary thiamine-phosphate synthase enzyme OS	Rhodopseudomonas faecalis OX	0.64708	0.853333	1
tr|A0A318TQX2|A0A318TQX2_9BRAD	Uncharacterized protein OS	Rhodopseudomonas faecalis OX	0.02323	0.853551	9
tr|A0A318TBK5|A0A318TBK5_9BRAD	Lon N-terminal domain-containing protein OS	Rhodopseudomonas faecalis OX	0.1074	0.853635	6
tr|A0A318TIH4|A0A318TIH4_9BRAD	RNA polymerase sigma factor RpoH OS	Rhodopseudomonas faecalis OX	0.3561	0.853653	3
tr|A0A318THN5|A0A318THN5_9BRAD	Ubiquinone/menaquinone biosynthesis C-methylase UbiE OS	Rhodopseudomonas faecalis OX	0.55156	0.853881	1
tr|Q07J60|Q07J60_RHOP5	NAD(P)(+) transhydrogenase (AB-specific) OS	Rhodopseudomonas palustris (strain BisA53) OX	0.81398	0.853886	1
tr|A0A318TE10|A0A318TE10_9BRAD	Agarase OS	Rhodopseudomonas faecalis OX	0.11456	0.854665	6
tr|A0A318TE33|A0A318TE33_9BRAD	GreA/GreB family elongation factor OS	Rhodopseudomonas faecalis OX	0.54698	0.855144	3
tr|A0A318TIJ1|A0A318TIJ1_9BRAD	Glucose-1-phosphate adenylyltransferase OS	Rhodopseudomonas faecalis OX	0.05196	0.855308	9
tr|A0A212RL66|A0A212RL66_RHOAC	ATP-dependent RNA helicase SUPV3L1/SUV3 OS	Rhodoblastus acidophilus OX	0.57658	0.855382	1
tr|A0A318TB05|A0A318TB05_9BRAD	N-ethylmaleimide reductase OS	Rhodopseudomonas faecalis OX	0.17395	0.855441	10
tr|A0A4U1JPL1|A0A4U1JPL1_RHOCA	Transporter substrate-binding domain-containing protein OS	Rhodobacter capsulatus OX	0.68691	0.856663	1
tr|A0A318T867|A0A318T867_9BRAD	Putative DNA-binding ribbon-helix-helix protein OS	Rhodopseudomonas faecalis OX	0.42452	0.856844	3
tr|A0A318TCI9|A0A318TCI9_9BRAD	Apolipoprotein A1/A4/E domain-containing protein OS	Rhodopseudomonas faecalis OX	0.00119	0.857161	10
tr|A0A4U1JT62|A0A4U1JT62_RHOCA	Peptidyl-prolyl cis-trans isomerase OS	Rhodobacter capsulatus OX	0.58408	0.857645	2
tr|A0A318TI75|A0A318TI75_9BRAD	Putative NAD(P)-binding protein OS	Rhodopseudomonas faecalis OX	0.42928	0.857763	1
tr|A0A0Q0UF03|A0A0Q0UF03_RHOCA	3,4-dihydroxy-2-butanone 4-phosphate synthase OS	Rhodobacter capsulatus OX	0.62953	0.857838	3
tr|A0A318T7W0|A0A318T7W0_9BRAD	O-acetylhomoserine sulfhydrylase OS	Rhodopseudomonas faecalis OX	0.1345	0.857945	8
tr|A0A318TH44|A0A318TH44_9BRAD	Uncharacterized protein OS	Rhodopseudomonas faecalis OX	0.00337	0.857988	9
tr|A0A0Q0VIF7|A0A0Q0VIF7_RHOCA	Erythritol transport system substrate-binding protein OS	Rhodobacter capsulatus OX	0.52275	0.858191	10
tr|A0A318THH2|A0A318THH2_9BRAD	Molybdopterin-binding protein OS	Rhodopseudomonas faecalis OX	0.46505	0.8582	1
tr|A0A318TI85|A0A318TI85_9BRAD	Geranylgeranyl reductase OS	Rhodopseudomonas faecalis OX	0.15642	0.858313	9
tr|A0A6G8URW1|A0A6G8URW1_9ENTR	Maltodextrin-binding protein OS	Citrobacter sp. Y3 OX	0.55868	0.859118	3
tr|A0A318T8W5|A0A318T8W5_9BRAD	Polyhydroxyalkanoate synthesis repressor PhaR OS	Rhodopseudomonas faecalis OX	0.07636	0.859594	8
tr|A0A1H8WHP8|A0A1H8WHP8_9BRAD	Uncharacterized protein OS	Rhodopseudomonas pseudopalustris OX	0.71741	0.85991	1
tr|F8WZT5|F8WZT5_9BACT	50S ribosomal protein L13 OS	Dysgonomonas mossii DSM 22836 OX	0.54761	0.860254	1
tr|A0A1G7ECU3|A0A1G7ECU3_RHOCA	D-xylose transport system substrate-binding protein OS	Rhodobacter capsulatus OX	0.44039	0.860332	10
tr|A0A2T4J642|A0A2T4J642_RHOBL	Nitrate ABC transporter substrate-binding protein OS	Rhodobacter blasticus DSM 2131 OX	0.58416	0.861203	1
tr|C8RXF4|C8RXF4_9RHOB	30S ribosomal protein S15 OS	Rhodobacter sp. SW2 OX	0.59	0.861378	2
tr|D5AQF1|D5AQF1_RHOCB	Aldolase, DeoC/LacD family OS	Rhodobacter capsulatus (strain ATCC BAA-309 / NBRC 16581 / SB1003) OX	0.82313	0.861537	3
tr|A0A318TNH2|A0A318TNH2_9BRAD	Glutamine synthetase OS	Rhodopseudomonas faecalis OX	0.05873	0.861896	10
tr|A0A2T4JA34|A0A2T4JA34_RHOBL	Methoxyneurosporene dehydrogenase OS	Rhodobacter blasticus DSM 2131 OX	0.45647	0.861998	8
tr|A0A348MNE4|A0A348MNE4_9RHOB	50S ribosomal protein L34 OS	Rhodobacter sp. OX	0.80695	0.862139	1
tr|A0A318T6U8|A0A318T6U8_9BRAD	Xanthine dehydrogenase molybdenum binding subunit apoprotein OS	Rhodopseudomonas faecalis OX	0.08605	0.862689	10
tr|A0A318TGD2|A0A318TGD2_9BRAD	Amino acid/amide ABC transporter ATP-binding protein 1 (HAAT family) OS	Rhodopseudomonas faecalis OX	0.2052	0.862726	7
tr|A0A318TQR7|A0A318TQR7_9BRAD	Uncharacterized protein OS	Rhodopseudomonas faecalis OX	0.06284	0.862993	10
tr|A0A318TEM1|A0A318TEM1_9BRAD	SPFH domain-containing protein OS	Rhodopseudomonas faecalis OX	0.08072	0.863073	1
tr|A0A318TZM2|A0A318TZM2_9BRAD	Cytokinin riboside 5'-monophosphate phosphoribohydrolase OS	Rhodopseudomonas faecalis OX	0.13023	0.86371	3
tr|A0A318TJE9|A0A318TJE9_9BRAD	Dihydroorotate dehydrogenase (quinone) OS	Rhodopseudomonas faecalis OX	0.2157	0.86523	7
tr|Q3J0X3|Q3J0X3_RHOS4	Cold-shock DNA-binding protein family OS	Rhodobacter sphaeroides (strain ATCC 17023 / 2.4.1 / NCIB 8253 / DSM 158) OX	0.45001	0.865504	1
tr|A0A318TD83|A0A318TD83_9BRAD	Cobaltochelatase CobS subunit OS	Rhodopseudomonas faecalis OX	0.22894	0.865868	8
tr|D5AM57|D5AM57_RHOCB	50S ribosomal protein L19 OS	Rhodobacter capsulatus (strain ATCC BAA-309 / NBRC 16581 / SB1003) OX	0.62275	0.865985	2
tr|A0A318THB5|A0A318THB5_9BRAD	4-phosphoerythronate dehydrogenase (FAD-dependent) OS	Rhodopseudomonas faecalis OX	0.24012	0.866175	1
tr|A0A318TSQ1|A0A318TSQ1_9BRAD	Enoyl-CoA hydratase OS	Rhodopseudomonas faecalis OX	0.00191	0.866676	9
tr|A0A1G7PR86|A0A1G7PR86_RHOCA	Pimeloyl-ACP methyl ester carboxylesterase OS	Rhodobacter capsulatus OX	0.66258	0.86765	2
tr|A0A318TL03|A0A318TL03_9BRAD	NAD kinase OS	Rhodopseudomonas faecalis OX	0.05658	0.868023	2
tr|R8X4P9|R8X4P9_9ENTR	Uncharacterized protein OS	Citrobacter sp. KTE151 OX	0.4322	0.868088	1
tr|A0A318TGA6|A0A318TGA6_9BRAD	Amino acid/amide ABC transporter substrate-binding protein (HAAT family) OS	Rhodopseudomonas faecalis OX	0.67192	0.868297	2
tr|A0A318THP8|A0A318THP8_9BRAD	3-hydroxybutyrate dehydrogenase OS	Rhodopseudomonas faecalis OX	0.00558	0.86836	4
tr|A0A318TSU4|A0A318TSU4_9BRAD	Uncharacterized protein OS	Rhodopseudomonas faecalis OX	0.68448	0.870171	2
tr|A0A0Q0QKD4|A0A0Q0QKD4_RHOCA	Crotonyl-CoA carboxylase/reductase OS	Rhodobacter capsulatus OX	0.66089	0.870193	4
tr|A0A318TNQ3|A0A318TNQ3_9BRAD	3-methylcrotonyl-CoA carboxylase beta subunit OS	Rhodopseudomonas faecalis OX	0.2301	0.870497	10
tr|A0A318TBA4|A0A318TBA4_9BRAD	NADPH:quinone reductase-like Zn-dependent oxidoreductase OS	Rhodopseudomonas faecalis OX	0.12707	0.870501	4
tr|A0A318TLW0|A0A318TLW0_9BRAD	Outer membrane protein OmpA-like peptidoglycan-associated protein OS	Rhodopseudomonas faecalis OX	0.72604	0.870771	3
tr|A0A318TJ55|A0A318TJ55_9BRAD	Uncharacterized protein OS	Rhodopseudomonas faecalis OX	0.6874	0.871401	1
tr|A0A318TKR4|A0A318TKR4_9BRAD	Uridylate kinase OS	Rhodopseudomonas faecalis OX	0.04034	0.87156	8
tr|A0A318TG57|A0A318TG57_9BRAD	Oligopeptidase B OS	Rhodopseudomonas faecalis OX	0.20756	0.871993	8
tr|A0A4V5PNY6|A0A4V5PNY6_RHOCA	50S ribosomal protein L23 OS	Rhodobacter capsulatus OX	0.56905	0.872237	1
tr|A0A318TF55|A0A318TF55_9BRAD	Histidine triad (HIT) family protein OS	Rhodopseudomonas faecalis OX	0.09582	0.87285	4
tr|D5ATE7|D5ATE7_RHOCB	30S ribosomal protein S20 OS	Rhodobacter capsulatus (strain ATCC BAA-309 / NBRC 16581 / SB1003) OX	0.81833	0.87294	2
tr|A0A318TGV6|A0A318TGV6_9BRAD	Acetyl-CoA C-acetyltransferase OS	Rhodopseudomonas faecalis OX	0.46794	0.873098	5
tr|A0A2T4JCI5|A0A2T4JCI5_RHOBL	BMP family ABC transporter substrate-binding protein OS	Rhodobacter blasticus DSM 2131 OX	0.66878	0.873194	2
tr|A0A318TRT7|A0A318TRT7_9BRAD	2-deoxy-D-gluconate 3-dehydrogenase OS	Rhodopseudomonas faecalis OX	0.12652	0.873991	4
tr|A0A318U048|A0A318U048_9BRAD	Cystathionine gamma-lyase OS	Rhodopseudomonas faecalis OX	0.65758	0.874116	10
tr|A0A318T9V8|A0A318T9V8_9BRAD	Amino acid/amide ABC transporter substrate-binding protein (HAAT family) OS	Rhodopseudomonas faecalis OX	0.37527	0.874458	10
tr|D5AKK8|D5AKK8_RHOCB	3-isopropylmalate dehydrogenase OS	Rhodobacter capsulatus (strain ATCC BAA-309 / NBRC 16581 / SB1003) OX	0.61266	0.875131	2
tr|A0A6G8UK64|A0A6G8UK64_9ENTR	NAD(P)H dehydrogenase (quinone) OS	Citrobacter sp. Y3 OX	0.60169	0.875634	2
tr|A0A318T979|A0A318T979_9BRAD	Sugar O-acyltransferase (Sialic acid O-acetyltransferase NeuD family) OS	Rhodopseudomonas faecalis OX	0.27773	0.876023	2
tr|Q137Y7|Q137Y7_RHOPS	Flagellin OS	Rhodopseudomonas palustris (strain BisB5) OX	0.34215	0.876829	9
tr|A0A318TIZ8|A0A318TIZ8_9BRAD	Enoyl-CoA hydratase/carnithine racemase OS	Rhodopseudomonas faecalis OX	0.32787	0.876883	3
tr|D5ASM0|D5ASM0_RHOCB	Nitrogen regulatory protein P-II OS	Rhodobacter capsulatus (strain ATCC BAA-309 / NBRC 16581 / SB1003) OX	0.79311	0.877418	4
tr|A0A318TPC0|A0A318TPC0_9BRAD	Fatty-acyl-CoA synthase OS	Rhodopseudomonas faecalis OX	0.28239	0.877509	9
tr|A0A318T8F9|A0A318T8F9_9BRAD	Uncharacterized protein DUF992 OS	Rhodopseudomonas faecalis OX	0.15883	0.877541	2
tr|A0A318TFH6|A0A318TFH6_9BRAD	Acetyl-CoA C-acetyltransferase OS	Rhodopseudomonas faecalis OX	0.30112	0.877817	9
tr|A0A318TBF4|A0A318TBF4_9BRAD	Metallo-beta-lactamase family protein OS	Rhodopseudomonas faecalis OX	0.05002	0.878815	8
tr|A0A318TLR3|A0A318TLR3_9BRAD	Methylisocitrate lyase OS	Rhodopseudomonas faecalis OX	0.61656	0.87924	10
tr|A0A318TCB9|A0A318TCB9_9BRAD	Isovaleryl-CoA dehydrogenase OS	Rhodopseudomonas faecalis OX	0.28251	0.87951	4
tr|Q07IA8|Q07IA8_RHOP5	Quinolinate phosphoribosyltransferase [decarboxylating] OS	Rhodopseudomonas palustris (strain BisA53) OX	0.59319	0.879798	1
tr|A0A318U460|A0A318U460_9RHOB	Cysteine synthase OS	Rhodobacter viridis OX	0.76058	0.879816	1
tr|A0A318TAK9|A0A318TAK9_9BRAD	ATP-dependent protease subunit HslV OS	Rhodopseudomonas faecalis OX	0.28682	0.880695	2
tr|A0A318TBP3|A0A318TBP3_9BRAD	NAD(P)-dependent dehydrogenase (Short-subunit alcohol dehydrogenase family) OS	Rhodopseudomonas faecalis OX	0.26711	0.880825	1
tr|A0A318TGM7|A0A318TGM7_9BRAD	Ribonuclease T2 OS	Rhodopseudomonas faecalis OX	0.22696	0.881073	1
tr|A0A318TG77|A0A318TG77_9BRAD	Uncharacterized protein OS	Rhodopseudomonas faecalis OX	0.1327	0.881638	2
tr|A0A318T9E1|A0A318T9E1_9BRAD	Putative membrane protein OS	Rhodopseudomonas faecalis OX	0.58736	0.881715	8
tr|A0A318TQH8|A0A318TQH8_9BRAD	Acyl-CoA dehydrogenase OS	Rhodopseudomonas faecalis OX	0.22486	0.882141	4
tr|A0A318TKV0|A0A318TKV0_9BRAD	Uncharacterized protein (DUF849 family) OS	Rhodopseudomonas faecalis OX	0.3627	0.882167	2
tr|A0A318TBS7|A0A318TBS7_9BRAD	Cobaltochelatase CobT subunit OS	Rhodopseudomonas faecalis OX	0.15916	0.882426	10
tr|A0A2T4JC21|A0A2T4JC21_RHOBL	DNA-binding protein OS	Rhodobacter blasticus DSM 2131 OX	0.59489	0.882532	4
tr|A0A318TDK1|A0A318TDK1_9BRAD	Uncharacterized protein YhaN OS	Rhodopseudomonas faecalis OX	0.23101	0.882611	5
tr|A0A318TCX5|A0A318TCX5_9BRAD	Uncharacterized protein OS	Rhodopseudomonas faecalis OX	0.13774	0.882863	2
tr|A0A2T4JFH6|A0A2T4JFH6_RHOBL	Beta-ketoacyl-ACP reductase OS	Rhodobacter blasticus DSM 2131 OX	0.58809	0.883674	1
tr|A0A318TXZ6|A0A318TXZ6_9BRAD	Phosphofructokinase OS	Rhodopseudomonas faecalis OX	0.13989	0.884769	7
tr|A0A318TGH8|A0A318TGH8_9BRAD	Cytochrome c553 OS	Rhodopseudomonas faecalis OX	0.51144	0.885066	3
tr|A0A318U0I7|A0A318U0I7_9BRAD	Uncharacterized protein OS	Rhodopseudomonas faecalis OX	0.5374	0.885297	10
tr|B9KKT8|B9KKT8_RHOSK	Nitrogenase protein alpha chain OS	Rhodobacter sphaeroides (strain KD131 / KCTC 12085) OX	0.72185	0.885393	1
tr|A0A1G7MDU8|A0A1G7MDU8_RHOCA	Glutathione S-transferase OS	Rhodobacter capsulatus OX	0.79993	0.885479	1
tr|A0A318TGU1|A0A318TGU1_9BRAD	Pimeloyl-CoA dehydrogenase small subunit OS	Rhodopseudomonas faecalis OX	0.00849	0.885721	8
tr|A0A318TA09|A0A318TA09_9BRAD	Succinate dehydrogenase hydrophobic membrane anchor subunit OS	Rhodopseudomonas faecalis OX	0.06386	0.885817	1
tr|A0A318T8U8|A0A318T8U8_9BRAD	Ribosome maturation factor RimP OS	Rhodopseudomonas faecalis OX	0.35557	0.886382	5
tr|D5AVA5|D5AVA5_RHOCB	Adenylosuccinate lyase OS	Rhodobacter capsulatus (strain ATCC BAA-309 / NBRC 16581 / SB1003) OX	0.69741	0.88705	1
tr|A0A318TDM3|A0A318TDM3_9BRAD	Acetyl-CoA synthetase OS	Rhodopseudomonas faecalis OX	0.33292	0.887688	8
tr|D5ATE4|D5ATE4_RHOCB	Ubiquinone/menaquinone biosynthesis C-methyltransferase UbiE OS	Rhodobacter capsulatus (strain ATCC BAA-309 / NBRC 16581 / SB1003) OX	0.55267	0.887866	1
tr|A0A318TN74|A0A318TN74_9BRAD	Molybdenum cofactor synthesis domain-containing protein OS	Rhodopseudomonas faecalis OX	0.26716	0.888387	5
tr|A0A318TIL2|A0A318TIL2_9BRAD	ATP-dependent zinc metalloprotease FtsH OS	Rhodopseudomonas faecalis OX	0.38675	0.888545	9
tr|A0A318TFE0|A0A318TFE0_9BRAD	AsmA protein OS	Rhodopseudomonas faecalis OX	0.25768	0.888568	6
tr|A0A0Q0ULC3|A0A0Q0ULC3_RHOCA	HlyD family secretion protein OS	Rhodobacter capsulatus OX	0.72299	0.88918	5
tr|A0A4U1JQM9|A0A4U1JQM9_RHOCA	Glyceraldehyde-3-phosphate dehydrogenase OS	Rhodobacter capsulatus OX	0.26215	0.889358	6
tr|A0A318TGE8|A0A318TGE8_9BRAD	Glyceraldehyde-3-phosphate dehydrogenase (NAD+) OS	Rhodopseudomonas faecalis OX	0.21571	0.889405	10
tr|Q07QW2|Q07QW2_RHOP5	O-acetylhomoserine/O-acetylserine sulfhydrylase OS	Rhodopseudomonas palustris (strain BisA53) OX	0.78398	0.889607	1
tr|A0A0Q0QQY9|A0A0Q0QQY9_RHOCA	Aldehyde dehydrogenase OS	Rhodobacter capsulatus OX	0.39112	0.889655	9
tr|D5ALH2|D5ALH2_RHOCB	Two component transcriptional regulator, winged helix family OS	Rhodobacter capsulatus (strain ATCC BAA-309 / NBRC 16581 / SB1003) OX	0.7695	0.889741	1
tr|A0A318TFD5|A0A318TFD5_9BRAD	Single cache domain-containing protein OS	Rhodopseudomonas faecalis OX	0.62387	0.89015	9
tr|A0A318TEA5|A0A318TEA5_9BRAD	Uncharacterized protein OS	Rhodopseudomonas faecalis OX	0.49508	0.890686	7
tr|A0A318TDR1|A0A318TDR1_9BRAD	2-desacetyl-2-hydroxyethyl bacteriochlorophyllide A dehydrogenase OS	Rhodopseudomonas faecalis OX	0.10195	0.892112	9
tr|A0A318TCZ3|A0A318TCZ3_9BRAD	Efflux pump membrane transporter OS	Rhodopseudomonas faecalis OX	0.26362	0.892619	6
tr|A0A318U0U8|A0A318U0U8_9BRAD	CheY-like chemotaxis protein OS	Rhodopseudomonas faecalis OX	0.54669	0.892847	1
tr|A0A318TG20|A0A318TG20_9BRAD	Sulfide dehydrogenase (Flavocytochrome c) flavoprotein subunit OS	Rhodopseudomonas faecalis OX	0.71549	0.893356	10
tr|A0A318TI19|A0A318TI19_9BRAD	2-oxoglutarate ferredoxin oxidoreductase alpha subunit OS	Rhodopseudomonas faecalis OX	0.51119	0.893569	8
tr|A0A318TN45|A0A318TN45_9BRAD	Citronellyl-CoA dehydrogenase OS	Rhodopseudomonas faecalis OX	0.44917	0.893602	3
tr|A0A318TN60|A0A318TN60_9BRAD	Transglutaminase-like putative cysteine protease OS	Rhodopseudomonas faecalis OX	0.66296	0.89362	3
tr|A0A318TCA3|A0A318TCA3_9BRAD	Protein GrpE OS	Rhodopseudomonas faecalis OX	0.15918	0.893707	6
tr|A0A318TCF6|A0A318TCF6_9BRAD	Flagellin-like protein (Fragment) OS	Rhodopseudomonas faecalis OX	0.4411	0.894337	6
tr|A0A2T4J6W2|A0A2T4J6W2_RHOBL	Amino acid ABC transporter substrate-binding protein OS	Rhodobacter blasticus DSM 2131 OX	0.71404	0.894606	9
tr|A0A318TK71|A0A318TK71_9BRAD	Nif-specific regulatory protein OS	Rhodopseudomonas faecalis OX	0.59624	0.89487	3
tr|A0A318TEV6|A0A318TEV6_9BRAD	Indole-3-acetamide hydrolase OS	Rhodopseudomonas faecalis OX	0.19901	0.895027	2
tr|A0A1G7PAT1|A0A1G7PAT1_RHOCA	2-isopropylmalate synthase OS	Rhodobacter capsulatus OX	0.77205	0.895553	3
tr|R8WK88|R8WK88_9ENTR	Regulatory protein AsnC OS	Citrobacter sp. KTE151 OX	0.67396	0.895933	1
tr|A0A318TPK4|A0A318TPK4_9BRAD	Uncharacterized protein OS	Rhodopseudomonas faecalis OX	0.7397	0.895991	1
tr|A0A318TAC4|A0A318TAC4_9BRAD	Acyl-CoA dehydrogenase OS	Rhodopseudomonas faecalis OX	0.09315	0.896085	5
tr|A0A318TNC8|A0A318TNC8_9BRAD	Dihydrofolate reductase OS	Rhodopseudomonas faecalis OX	0.23182	0.896144	3
tr|D5AQ24|D5AQ24_RHOCB	Dipeptide ABC transporter, periplasmic dipeptide-binding protein DppA OS	Rhodobacter capsulatus (strain ATCC BAA-309 / NBRC 16581 / SB1003) OX	0.57973	0.896192	2
tr|A0A318TUF2|A0A318TUF2_9BRAD	Replication-associated recombination protein A OS	Rhodopseudomonas faecalis OX	0.44577	0.896258	1
tr|A0A318TIN5|A0A318TIN5_9BRAD	Microcin-processing peptidase 2 OS	Rhodopseudomonas faecalis OX	0.27062	0.89628	7
tr|A8AJ46|A8AJ46_CITK8	Uncharacterized protein OS	Citrobacter koseri (strain ATCC BAA-895 / CDC 4225-83 / SGSC4696) OX	0.87554	0.896659	1
tr|A0A318TNT9|A0A318TNT9_9BRAD	Uncharacterized protein OS	Rhodopseudomonas faecalis OX	0.22634	0.896758	6
tr|Q3IYB3|Q3IYB3_RHOS4	Amino acid/amide ABC transporter substrate-binding protein, HAAT family OS	Rhodobacter sphaeroides (strain ATCC 17023 / 2.4.1 / NCIB 8253 / DSM 158) OX	0.4403	0.89677	1
tr|A0A318TA21|A0A318TA21_9BRAD	Cytochrome c556 OS	Rhodopseudomonas faecalis OX	0.31479	0.89706	4
tr|A0A1G7MQ26|A0A1G7MQ26_RHOCA	ATP synthase subunit delta OS	Rhodobacter capsulatus OX	0.8589	0.897355	2
tr|A0A318TMA8|A0A318TMA8_9BRAD	SIR2-like protein OS	Rhodopseudomonas faecalis OX	0.68966	0.897393	3
tr|A0A318THI8|A0A318THI8_9BRAD	Catalase-peroxidase OS	Rhodopseudomonas faecalis OX	0.54109	0.897407	9
tr|A0A318TV48|A0A318TV48_9BRAD	Iron-regulated ABC transporter permease protein SufD OS	Rhodopseudomonas faecalis OX	0.35331	0.897576	5
tr|A0A318TA91|A0A318TA91_9BRAD	CBS domain protein OS	Rhodopseudomonas faecalis OX	0.08272	0.897616	5
tr|A0A6G8UFZ1|A0A6G8UFZ1_9ENTR	Peptidyl-prolyl cis-trans isomerase OS	Citrobacter sp. Y3 OX	0.75945	0.897642	1
tr|A0A2T4J5J3|A0A2T4J5J3_RHOBL	Glyceraldehyde-3-phosphate dehydrogenase OS	Rhodobacter blasticus DSM 2131 OX	0.67832	0.897936	1
tr|A0A0Q0ZZ02|A0A0Q0ZZ02_RHOCA	UTP--glucose-1-phosphate uridylyltransferase OS	Rhodobacter capsulatus OX	0.52445	0.898178	1
tr|A0A0Q0VD10|A0A0Q0VD10_RHOCA	Adenosylhomocysteinase OS	Rhodobacter capsulatus OX	0.79489	0.89933	4
tr|A0A318TVV1|A0A318TVV1_9BRAD	6,7-dimethyl-8-ribityllumazine synthase OS	Rhodopseudomonas faecalis OX	0.57192	0.899663	2
tr|A0A318TCA2|A0A318TCA2_9BRAD	Xre family transcriptional regulator OS	Rhodopseudomonas faecalis OX	0.56417	0.899729	1
tr|A0A4V5PP73|A0A4V5PP73_RHOCA	Malate dehydrogenase OS	Rhodobacter capsulatus OX	0.72803	0.899858	3
tr|Q21AW7|Q21AW7_RHOPB	Cold-shock DNA-binding protein family OS	Rhodopseudomonas palustris (strain BisB18) OX	0.60717	0.899888	4
tr|A0A318TKC9|A0A318TKC9_9BRAD	C4-dicarboxylate-binding protein DctP OS	Rhodopseudomonas faecalis OX	0.44129	0.899917	10
tr|A0A4U1JME7|A0A4U1JME7_RHOCA	Ferredoxin OS	Rhodobacter capsulatus OX	0.8201	0.899987	3
tr|A0A318TBC2|A0A318TBC2_9BRAD	Uncharacterized protein OS	Rhodopseudomonas faecalis OX	0.374	0.900964	3
tr|A0A318TDD6|A0A318TDD6_9BRAD	YARHG domain-containing protein OS	Rhodopseudomonas faecalis OX	0.54654	0.900967	2
tr|A0A318T840|A0A318T840_9BRAD	Chaperone protein HtpG OS	Rhodopseudomonas faecalis OX	0.42415	0.90098	9
tr|A0A318TCA6|A0A318TCA6_9BRAD	Coenzyme A biosynthesis bifunctional protein CoaBC OS	Rhodopseudomonas faecalis OX	0.72837	0.900982	1
tr|A0A4U1JR93|A0A4U1JR93_RHOCA	GTP 3',8-cyclase (Fragment) OS	Rhodobacter capsulatus OX	0.70857	0.900992	1
tr|A0A0Q0QVZ0|A0A0Q0QVZ0_RHOCA	Phosphoglycerate kinase OS	Rhodobacter capsulatus OX	0.59252	0.90213	6
tr|A0A318TNF5|A0A318TNF5_9BRAD	Acyl-CoA hydrolase OS	Rhodopseudomonas faecalis OX	0.63856	0.902287	2
tr|A0A1G7H1I2|A0A1G7H1I2_RHOCA	Invasion protein IalB, involved in pathogenesis OS	Rhodobacter capsulatus OX	0.83658	0.902911	4
tr|A0A318T962|A0A318T962_9BRAD	Amino acid/amide ABC transporter ATP-binding protein 1 (HAAT family) OS	Rhodopseudomonas faecalis OX	0.46115	0.904706	1
tr|A0A318TR49|A0A318TR49_9BRAD	Indolepyruvate ferredoxin oxidoreductase beta subunit OS	Rhodopseudomonas faecalis OX	0.48876	0.905049	7
tr|A0A4U1JRB3|A0A4U1JRB3_RHOCA	CoA-acylating methylmalonate-semialdehyde dehydrogenase OS	Rhodobacter capsulatus OX	0.52178	0.905422	1
tr|A0A4U1JS92|A0A4U1JS92_RHOCA	etoacetyl	Rhodobacter capsulatus OX	0.52429	0.905491	1
tr|A0A318TVS3|A0A318TVS3_9BRAD	Uncharacterized LabA/DUF88 family protein OS	Rhodopseudomonas faecalis OX	0.52352	0.906295	6
tr|A0A318TM39|A0A318TM39_9BRAD	HK97 family phage portal protein OS	Rhodopseudomonas faecalis OX	0.47717	0.906935	6
tr|A0A318THJ1|A0A318THJ1_9BRAD	PAS/PAC sensor signal transduction histidine kinase OS	Rhodopseudomonas faecalis OX	0.40101	0.907137	2
tr|A0A1G7L840|A0A1G7L840_RHOCA	Protein-disulfide isomerase OS	Rhodobacter capsulatus OX	0.79224	0.907304	3
tr|A0A318TN46|A0A318TN46_9BRAD	4-hydroxy-tetrahydrodipicolinate synthase OS	Rhodopseudomonas faecalis OX	0.06505	0.907953	4
tr|A0A318T7W7|A0A318T7W7_9BRAD	Uncharacterized protein YidB (DUF937 family) OS	Rhodopseudomonas faecalis OX	0.42422	0.909131	3
tr|A0A318TF25|A0A318TF25_9BRAD	Nucleoside triphosphate pyrophosphatase OS	Rhodopseudomonas faecalis OX	0.4891	0.90963	2
tr|D5ATY2|D5ATY2_RHOCB	3-oxoacyl-[acyl-carrier-protein] reductase OS	Rhodobacter capsulatus (strain ATCC BAA-309 / NBRC 16581 / SB1003) OX	0.71023	0.909673	4
tr|Q2IWI3|Q2IWI3_RHOP2	DUF3597 domain-containing protein OS	Rhodopseudomonas palustris (strain HaA2) OX	0.47271	0.909698	1
tr|A0A318T9B0|A0A318T9B0_9BRAD	Putative polyhydroxyalkanoic acid system protein OS	Rhodopseudomonas faecalis OX	0.57765	0.909798	3
tr|A0A318TSE3|A0A318TSE3_9BRAD	Crp/Fnr family transcriptional regulator OS	Rhodopseudomonas faecalis OX	0.54041	0.910125	1
tr|F8X3I3|F8X3I3_9BACT	Uncharacterized protein OS	Dysgonomonas mossii DSM 22836 OX	0.70079	0.910188	1
tr|A0A318TD64|A0A318TD64_9BRAD	Coproporphyrinogen-III oxidase OS	Rhodopseudomonas faecalis OX	0.45704	0.910318	10
tr|A0A318T8V9|A0A318T8V9_9BRAD	Acyl dehydratase OS	Rhodopseudomonas faecalis OX	0.1434	0.910832	1
tr|A0A318TC30|A0A318TC30_9BRAD	UDP-N-acetylmuramoyl-tripeptide--D-alanyl-D-alanine ligase OS	Rhodopseudomonas faecalis OX	0.28139	0.910963	2
tr|A0A318T9D9|A0A318T9D9_9BRAD	Microcin C transport system substrate-binding protein OS	Rhodopseudomonas faecalis OX	0.08657	0.911219	6
tr|A0A318T8C7|A0A318T8C7_9BRAD	Glyoxylase-like metal-dependent hydrolase (Beta-lactamase superfamily II) OS	Rhodopseudomonas faecalis OX	0.50002	0.911502	2
tr|A0A318TYX3|A0A318TYX3_9BRAD	Amino acid/amide ABC transporter substrate-binding protein (HAAT family) OS	Rhodopseudomonas faecalis OX	0.31125	0.911652	10
tr|A0A318TUG8|A0A318TUG8_9BRAD	Iron-sulfur cluster assembly accessory protein OS	Rhodopseudomonas faecalis OX	0.53488	0.911709	2
tr|A0A4U1JQG1|A0A4U1JQG1_RHOCA	Ribosome maturation factor RimP OS	Rhodobacter capsulatus OX	0.7933	0.911758	1
tr|A0A1G7HQ19|A0A1G7HQ19_RHOCA	Enolase OS	Rhodobacter capsulatus OX	0.62712	0.911921	7
tr|A0A318TQ18|A0A318TQ18_9BRAD	1,4-alpha-glucan branching enzyme GlgB OS	Rhodopseudomonas faecalis OX	0.29118	0.912276	3
tr|A0A318T7Z9|A0A318T7Z9_9BRAD	Uncharacterized protein OS	Rhodopseudomonas faecalis OX	0.55334	0.91265	10
tr|A0A1G7MAV6|A0A1G7MAV6_RHOCA	Ca2+-binding protein, RTX toxin-related OS	Rhodobacter capsulatus OX	0.47567	0.91268	3
tr|D2TTB5|D2TTB5_CITRI	Thioredoxin peroxidase OS	Citrobacter rodentium (strain ICC168) OX	0.53436	0.913436	1
tr|A0A318TBN6|A0A318TBN6_9BRAD	Long-chain acyl-CoA synthetase OS	Rhodopseudomonas faecalis OX	0.34719	0.913635	7
tr|A0A4Y9IKV9|A0A4Y9IKV9_9BACT	Ferritin OS	Dysgonomonas mossii OX	0.59311	0.913769	1
tr|A0A318TGV9|A0A318TGV9_9BRAD	Uncharacterized protein DUF1049 OS	Rhodopseudomonas faecalis OX	0.30582	0.914221	3
tr|A0A318TKK7|A0A318TKK7_9BRAD	2-methylcitrate dehydratase OS	Rhodopseudomonas faecalis OX	0.77276	0.914295	10
tr|A0A318TIU3|A0A318TIU3_9BRAD	Amino acid/amide ABC transporter ATP-binding protein 1 (HAAT family) OS	Rhodopseudomonas faecalis OX	0.54787	0.915633	1
tr|A0A1G7JA52|A0A1G7JA52_RHOCA	Uncharacterized protein OS	Rhodobacter capsulatus OX	0.9158	0.915674	2
tr|A0A318T7W1|A0A318T7W1_9BRAD	tRNA (cytidine/uridine-2'-O-)-methyltransferase TrmJ OS	Rhodopseudomonas faecalis OX	0.27551	0.917267	2
tr|A0A318TL79|A0A318TL79_9BRAD	Phosphoadenylylsulfate reductase (Thioredoxin) OS	Rhodopseudomonas faecalis OX	0.61818	0.917421	3
tr|A0A318THS2|A0A318THS2_9BRAD	MoxR-like ATPase OS	Rhodopseudomonas faecalis OX	0.55255	0.91777	7
tr|A0A318TG74|A0A318TG74_9BRAD	Fatty-acyl-CoA synthase OS	Rhodopseudomonas faecalis OX	0.28668	0.917893	10
tr|A0A318TDG5|A0A318TDG5_9BRAD	Peptidoglycan-associated protein OS	Rhodopseudomonas faecalis OX	0.64288	0.918013	3
tr|A0A318TH17|A0A318TH17_9BRAD	Lipopolysaccharide export system ATP-binding protein LptB OS	Rhodopseudomonas faecalis OX	0.70967	0.918815	1
tr|V7EK40|V7EK40_9RHOB	Photosynthetic reaction center L subunit OS	Rhodobacter sp. CACIA14H1 OX	0.83509	0.919174	1
tr|A0A318TEB6|A0A318TEB6_9BRAD	Uncharacterized protein OS	Rhodopseudomonas faecalis OX	0.61085	0.919994	7
tr|A0A0Q0QW64|A0A0Q0QW64_RHOCA	Cytochrome c556 OS	Rhodobacter capsulatus OX	0.87876	0.920081	8
tr|A0A318TMM1|A0A318TMM1_9BRAD	NAD(P)-dependent dehydrogenase (Short-subunit alcohol dehydrogenase family) OS	Rhodopseudomonas faecalis OX	0.49132	0.920209	5
tr|A0A0Q0WES2|A0A0Q0WES2_RHOCA	Citrate synthase OS	Rhodobacter capsulatus OX	0.5617	0.920512	2
tr|A0A318TDR0|A0A318TDR0_9BRAD	Uncharacterized protein OS	Rhodopseudomonas faecalis OX	0.59301	0.920679	3
tr|A0A6B3RIX7|A0A6B3RIX7_9RHOB	Alpha-D-glucose phosphate-specific phosphoglucomutase OS	Rhodobacter sp. ETT8 OX	0.48552	0.920768	1
tr|A0A1G7JXI9|A0A1G7JXI9_RHOCA	Elongation factor G OS	Rhodobacter capsulatus OX	0.73923	0.921058	7
tr|Q07RF1|Q07RF1_RHOP5	RNA polymerase-binding transcription factor DksA OS	Rhodopseudomonas palustris (strain BisA53) OX	0.47528	0.921252	3
tr|A0A318TCN1|A0A318TCN1_9BRAD	Ribosome hibernation promoting factor OS	Rhodopseudomonas faecalis OX	0.2673	0.921425	8
tr|Q07MY0|Q07MY0_RHOP5	Peptidyl-prolyl cis-trans isomerase OS	Rhodopseudomonas palustris (strain BisA53) OX	0.80194	0.921699	1
tr|A0A318TAF4|A0A318TAF4_9BRAD	NADH dehydrogenase OS	Rhodopseudomonas faecalis OX	0.29345	0.921718	10
tr|A0A318TZN9|A0A318TZN9_9BRAD	MoxR-like ATPase OS	Rhodopseudomonas faecalis OX	0.25449	0.923147	6
tr|A0A2T4J686|A0A2T4J686_RHOBL	ATP synthase subunit alpha OS	Rhodobacter blasticus DSM 2131 OX	0.76069	0.923314	1
tr|Q9KWR7|Q9KWR7_RHOCA	Farnesyl diphosphate synthase OS	Rhodobacter capsulatus OX	0.74544	0.923332	1
tr|Q07VQ0|Q07VQ0_RHOP5	Short-chain dehydrogenase/reductase SDR OS	Rhodopseudomonas palustris (strain BisA53) OX	0.65009	0.923454	1
tr|A0A318TGV5|A0A318TGV5_9BRAD	Tripartite ATP-independent transporter DctP family solute receptor OS	Rhodopseudomonas faecalis OX	0.33431	0.923945	9
tr|A0A318TM48|A0A318TM48_9BRAD	Fructose-bisphosphate aldolase OS	Rhodopseudomonas faecalis OX	0.37692	0.924393	10
tr|A0A318T9D8|A0A318T9D8_9BRAD	ATP synthase epsilon chain OS	Rhodopseudomonas faecalis OX	0.18208	0.924564	2
tr|A0A318TLQ5|A0A318TLQ5_9BRAD	Uncharacterized protein OS	Rhodopseudomonas faecalis OX	0.70886	0.924764	4
tr|A0A0Q0URW2|A0A0Q0URW2_RHOCA	Ubiquinol-cytochrome c reductase iron-sulfur subunit OS	Rhodobacter capsulatus OX	0.82815	0.925285	2
tr|D5ASM2|D5ASM2_RHOCB	Toluene tolerance family protein OS	Rhodobacter capsulatus (strain ATCC BAA-309 / NBRC 16581 / SB1003) OX	0.6166	0.925288	3
tr|A0A2T4J987|A0A2T4J987_RHOBL	Peptide ABC transporter substrate-binding protein OS	Rhodobacter blasticus DSM 2131 OX	0.75503	0.925715	1
tr|A0A318TT13|A0A318TT13_9BRAD	Mg-protoporphyrin IX methyltransferase OS	Rhodopseudomonas faecalis OX	0.70766	0.926127	7
tr|A0A318TDC7|A0A318TDC7_9BRAD	ATP synthase subunit b OS	Rhodopseudomonas faecalis OX	0.35364	0.926185	4
tr|A0A318TGH7|A0A318TGH7_9BRAD	Cysteine desulfurase OS	Rhodopseudomonas faecalis OX	0.75689	0.92654	9
tr|A0A318TQL2|A0A318TQL2_9BRAD	Putative alpha-E superfamily protein OS	Rhodopseudomonas faecalis OX	0.56225	0.927283	3
tr|A0A318TD53|A0A318TD53_9BRAD	ADP-ribose pyrophosphatase OS	Rhodopseudomonas faecalis OX	0.39485	0.927808	2
tr|A0A318TSW4|A0A318TSW4_9BRAD	Uncharacterized protein OS	Rhodopseudomonas faecalis OX	0.71359	0.928208	7
tr|A0A318TI08|A0A318TI08_9BRAD	Winged helix family two component transcriptional regulator OS	Rhodopseudomonas faecalis OX	0.15139	0.928248	9
tr|A0A318TFQ0|A0A318TFQ0_9BRAD	5-oxoprolinase subunit A OS	Rhodopseudomonas faecalis OX	0.26955	0.928542	1
tr|A0A1H8T922|A0A1H8T922_9BRAD	Indole-3-glycerol phosphate synthase OS	Rhodopseudomonas pseudopalustris OX	0.1732	0.928935	1
tr|D5ARV0|D5ARV0_RHOCB	Ketol-acid reductoisomerase (NADP(+)) OS	Rhodobacter capsulatus (strain ATCC BAA-309 / NBRC 16581 / SB1003) OX	0.81732	0.929729	1
tr|A0A0Q0ZQU8|A0A0Q0ZQU8_RHOCA	Cell division coordinator CpoB OS	Rhodobacter capsulatus OX	0.88214	0.929881	1
tr|A0A318TAH4|A0A318TAH4_9BRAD	Uncharacterized protein OS	Rhodopseudomonas faecalis OX	0.79686	0.929924	1
tr|A0A318TG19|A0A318TG19_9BRAD	CheW protein (Fragment) OS	Rhodopseudomonas faecalis OX	0.76024	0.93071	2
tr|A0A318TGA1|A0A318TGA1_9BRAD	Polyhydroxyalkanoate synthase OS	Rhodopseudomonas faecalis OX	0.65676	0.931093	2
tr|A0A318TTB1|A0A318TTB1_9BRAD	GNAT family acetyltransferase OS	Rhodopseudomonas faecalis OX	0.78799	0.931384	1
tr|A0A418VE41|A0A418VE41_RHOPL	DNA-binding response regulator OS	Rhodopseudomonas palustris OX	0.4071	0.931465	1
tr|A0A318TJR3|A0A318TJR3_9BRAD	DNA repair protein RadA OS	Rhodopseudomonas faecalis OX	0.88412	0.932893	1
tr|A0A318TCI8|A0A318TCI8_9BRAD	Ribosomal RNA small subunit methyltransferase G OS	Rhodopseudomonas faecalis OX	0.76618	0.93323	1
tr|A0A318TAK1|A0A318TAK1_9BRAD	Diketogulonate reductase-like aldo/keto reductase OS	Rhodopseudomonas faecalis OX	0.44637	0.933505	4
tr|A0A318TGL4|A0A318TGL4_9BRAD	YCII domain-containing protein OS	Rhodopseudomonas faecalis OX	0.77004	0.933588	1
tr|A0A318T9S9|A0A318T9S9_9BRAD	Histidine kinase OS	Rhodopseudomonas faecalis OX	0.38718	0.933754	8
tr|A0A4U1K3J3|A0A4U1K3J3_RHOCA	FprA family A-type flavoprotein OS	Rhodobacter capsulatus OX	0.72819	0.934263	1
tr|Q6N794|Q6N794_RHOPA	Possible nitrogenase iron-molybdenum cofactor biosynthesis protein NifE homolog OS	Rhodopseudomonas palustris (strain ATCC BAA-98 / CGA009) OX	0.88822	0.934274	4
tr|A0A318TBE8|A0A318TBE8_9BRAD	Flagellin OS	Rhodopseudomonas faecalis OX	0.51316	0.934306	7
tr|A0A318THC1|A0A318THC1_9BRAD	Protease inhibitor Inh OS	Rhodopseudomonas faecalis OX	0.28795	0.934394	3
tr|A0A318T9K1|A0A318T9K1_9BRAD	3-oxoacyl-[acyl-carrier-protein] synthase I OS	Rhodopseudomonas faecalis OX	0.32865	0.934595	8
tr|A0A318T905|A0A318T905_9BRAD	Flagellar basal body protein OS	Rhodopseudomonas faecalis OX	0.6892	0.934693	2
tr|A0A1G7FUV5|A0A1G7FUV5_RHOCA	Adenylate kinase OS	Rhodobacter capsulatus OX	0.73349	0.934974	2
tr|A0A1G7P0M8|A0A1G7P0M8_RHOCA	30S ribosomal protein S1 OS	Rhodobacter capsulatus OX	0.86737	0.935141	10
tr|A0A318T7N5|A0A318T7N5_9BRAD	Histidine kinase OS	Rhodopseudomonas faecalis OX	0.34431	0.935864	5
tr|A0A318TMJ8|A0A318TMJ8_9BRAD	Putrescine-binding periplasmic protein OS	Rhodopseudomonas faecalis OX	0.56391	0.935866	7
tr|A0A4Y9ILQ4|A0A4Y9ILQ4_9BACT	O-acetylhomoserine aminocarboxypropyltransferase/cysteine synthase OS	Dysgonomonas mossii OX	0.77779	0.936008	3
tr|R8X0R3|R8X0R3_9ENTR	Acidic protein MsyB OS	Citrobacter sp. KTE151 OX	0.70658	0.936206	1
tr|A0A318TU92|A0A318TU92_9BRAD	ATP-dependent Clp protease proteolytic subunit OS	Rhodopseudomonas faecalis OX	0.4175	0.936258	8
tr|A0A318TDP3|A0A318TDP3_9BRAD	Putative membrane-anchored protein OS	Rhodopseudomonas faecalis OX	0.26331	0.936569	6
tr|A0A318TFA1|A0A318TFA1_9BRAD	Cu+-exporting ATPase OS	Rhodopseudomonas faecalis OX	0.66509	0.936658	2
tr|A0A318TK69|A0A318TK69_9BRAD	Amino acid/amide ABC transporter ATP-binding protein 2 (HAAT family) OS	Rhodopseudomonas faecalis OX	0.4332	0.936695	4
tr|A0A318TKJ2|A0A318TKJ2_9BRAD	Uncharacterized protein DUF3126 OS	Rhodopseudomonas faecalis OX	0.55035	0.937037	1
tr|D5APC9|D5APC9_RHOCB	Succinate dehydrogenase iron-sulfur subunit OS	Rhodobacter capsulatus (strain ATCC BAA-309 / NBRC 16581 / SB1003) OX	0.84306	0.937351	2
tr|F8X293|F8X293_9BACT	PDZ domain-containing protein OS	Dysgonomonas mossii DSM 22836 OX	0.89672	0.937537	1
tr|A0A318TCB1|A0A318TCB1_9BRAD	Myo-inositol-1(Or 4)-monophosphatase OS	Rhodopseudomonas faecalis OX	0.58835	0.938148	3
tr|A0A318T8U6|A0A318T8U6_9BRAD	Electron transfer flavoprotein alpha subunit apoprotein OS	Rhodopseudomonas faecalis OX	0.51507	0.938632	8
tr|A0A318TKE9|A0A318TKE9_9BRAD	Glutathione S-transferase OS	Rhodopseudomonas faecalis OX	0.66048	0.939469	4
tr|A0A318TNC7|A0A318TNC7_9BRAD	Tryptophan synthase beta chain OS	Rhodopseudomonas faecalis OX	0.61562	0.939577	7
tr|A0A318TBN8|A0A318TBN8_9BRAD	Thioredoxin OS	Rhodopseudomonas faecalis OX	0.45242	0.940286	10
tr|A0A318TN35|A0A318TN35_9BRAD	GMP reductase OS	Rhodopseudomonas faecalis OX	0.64475	0.94029	3
tr|A0A318TLC7|A0A318TLC7_9BRAD	Uncharacterized protein OS	Rhodopseudomonas faecalis OX	0.69897	0.940347	2
tr|A0A318T6X8|A0A318T6X8_9BRAD	Methylthioribose-1-phosphate isomerase OS	Rhodopseudomonas faecalis OX	0.64583	0.940443	7
tr|D5ALH6|D5ALH6_RHOCB	Peptidase, M16 family OS	Rhodobacter capsulatus (strain ATCC BAA-309 / NBRC 16581 / SB1003) OX	0.84567	0.940822	1
tr|A0A0N8VFD1|A0A0N8VFD1_RHOCA	Phosphate transport system substrate-binding protein OS	Rhodobacter capsulatus OX	0.88084	0.941826	10
tr|A0A1G7LE51|A0A1G7LE51_RHOCA	Polyribonucleotide nucleotidyltransferase OS	Rhodobacter capsulatus OX	0.84306	0.941983	6
tr|A0A318THY5|A0A318THY5_9BRAD	Ribonuclease D OS	Rhodopseudomonas faecalis OX	0.82032	0.942383	1
tr|A0A318TE72|A0A318TE72_9BRAD	Polyribonucleotide nucleotidyltransferase OS	Rhodopseudomonas faecalis OX	0.40983	0.942514	10
tr|A0A318TG68|A0A318TG68_9BRAD	Glycine cleavage system H protein OS	Rhodopseudomonas faecalis OX	0.5769	0.942687	4
tr|A0A318TSA5|A0A318TSA5_9BRAD	6-carboxy-5,6,7,8-tetrahydropterin synthase OS	Rhodopseudomonas faecalis OX	0.83091	0.942804	1
tr|A0A318TI44|A0A318TI44_9BRAD	Uncharacterized protein OS	Rhodopseudomonas faecalis OX	0.64915	0.943091	7
tr|A0A4U1K050|A0A4U1K050_RHOCA	Ribulose bisphosphate carboxylase large chain OS	Rhodobacter capsulatus OX	0.68469	0.943113	1
tr|D5AM00|D5AM00_RHOCB	30S ribosomal protein S3 OS	Rhodobacter capsulatus (strain ATCC BAA-309 / NBRC 16581 / SB1003) OX	0.75942	0.94318	4
tr|A0A318TE01|A0A318TE01_9BRAD	BON domain-containing protein OS	Rhodopseudomonas faecalis OX	0.71024	0.943412	3
tr|A0A318T973|A0A318T973_9BRAD	Flagellar biosynthesis protein FliO OS	Rhodopseudomonas faecalis OX	0.35824	0.943855	3
tr|A0A318TKT7|A0A318TKT7_9BRAD	NADH-quinone oxidoreductase subunit B OS	Rhodopseudomonas faecalis OX	0.55684	0.944046	2
tr|A0A318TIT0|A0A318TIT0_9BRAD	Leucyl aminopeptidase OS	Rhodopseudomonas faecalis OX	0.69393	0.944212	1
tr|A0A318TEC1|A0A318TEC1_9BRAD	Flagellin-like hook-associated protein FlgL (Fragment) OS	Rhodopseudomonas faecalis OX	0.75269	0.944458	10
tr|A0A318TCE5|A0A318TCE5_9BRAD	UvrABC system protein B OS	Rhodopseudomonas faecalis OX	0.68402	0.944548	2
tr|D5AM62|D5AM62_RHOCB	30S ribosomal protein S16 OS	Rhodobacter capsulatus (strain ATCC BAA-309 / NBRC 16581 / SB1003) OX	0.91274	0.944553	3
tr|A0A318THD2|A0A318THD2_9BRAD	Enoyl-CoA hydratase/carnithine racemase OS	Rhodopseudomonas faecalis OX	0.37386	0.945381	8
tr|A0A318TFG1|A0A318TFG1_9BRAD	Indolepyruvate ferredoxin oxidoreductase OS	Rhodopseudomonas faecalis OX	0.67544	0.945428	1
tr|A0A318TGP5|A0A318TGP5_9BRAD	Uncharacterized protein OS	Rhodopseudomonas faecalis OX	0.46812	0.945443	5
tr|Q07PD8|Q07PD8_RHOP5	Propionyl-CoA carboxylase OS	Rhodopseudomonas palustris (strain BisA53) OX	0.70778	0.945481	1
tr|A0A318TA44|A0A318TA44_9BRAD	Putative thymidine phosphorylase OS	Rhodopseudomonas faecalis OX	0.36127	0.945681	10
tr|A0A318U0E2|A0A318U0E2_9BRAD	Enoyl-CoA hydratase OS	Rhodopseudomonas faecalis OX	0.476	0.945707	7
tr|A0A318T8R5|A0A318T8R5_9BRAD	16S rRNA (Cytosine967-C5)-methyltransferase OS	Rhodopseudomonas faecalis OX	0.64885	0.945768	3
tr|Q2J0G5|Q2J0G5_RHOP2	Antenna complex, alpha/beta subunit OS	Rhodopseudomonas palustris (strain HaA2) OX	0.92672	0.945895	1
sp|Q07MG7|EFP_RHOP5	Elongation factor P OS	Rhodopseudomonas palustris (strain BisA53) OX	0.90324	0.945949	1
tr|A0A4U1JT67|A0A4U1JT67_RHOCA	Energy-dependent translational throttle protein EttA OS	Rhodobacter capsulatus OX	0.79309	0.945966	2
tr|A0A318TLF6|A0A318TLF6_9BRAD	7,8-diamino-pelargonic acid aminotransferase OS	Rhodopseudomonas faecalis OX	0.69259	0.946121	2
tr|A0A318TMY2|A0A318TMY2_9BRAD	2-oxoglutarate ferredoxin oxidoreductase subunit gamma OS	Rhodopseudomonas faecalis OX	0.61275	0.946894	4
tr|A0A318TTL1|A0A318TTL1_9BRAD	Sugar transport protein OS	Rhodopseudomonas faecalis OX	0.74559	0.947511	6
tr|A0A318TJX3|A0A318TJX3_9BRAD	Thiosulfate/3-mercaptopyruvate sulfurtransferase OS	Rhodopseudomonas faecalis OX	0.81635	0.947782	1
tr|A0A318TB18|A0A318TB18_9BRAD	Glutathione synthetase OS	Rhodopseudomonas faecalis OX	0.31024	0.948053	5
tr|A0A318TET0|A0A318TET0_9BRAD	3-oxoacyl-[acyl-carrier protein] reductase OS	Rhodopseudomonas faecalis OX	0.86376	0.948617	1
tr|A0A0Q0R3B3|A0A0Q0R3B3_RHOCA	Ribosome-recycling factor OS	Rhodobacter capsulatus OX	0.88007	0.948766	1
tr|A0A318T6Z1|A0A318T6Z1_9BRAD	2,3,4,5-tetrahydropyridine-2,6-dicarboxylate N-succinyltransferase OS	Rhodopseudomonas faecalis OX	0.559	0.948771	8
tr|A0A318TSG7|A0A318TSG7_9BRAD	Ribulose-phosphate 3-epimerase OS	Rhodopseudomonas faecalis OX	0.54804	0.94909	7
tr|A0A318TDJ2|A0A318TDJ2_9BRAD	ABC-2 type transport system ATP-binding protein OS	Rhodopseudomonas faecalis OX	0.68409	0.949208	3
tr|A0A318TI31|A0A318TI31_9BRAD	Protein-disulfide isomerase OS	Rhodopseudomonas faecalis OX	0.65348	0.949529	3
tr|A0A318TRE8|A0A318TRE8_9BRAD	Pseudouridine synthase OS	Rhodopseudomonas faecalis OX	0.72144	0.949556	1
tr|A0A318TAF1|A0A318TAF1_9BRAD	Periplasmic serine endoprotease DegP-like OS	Rhodopseudomonas faecalis OX	0.41188	0.94962	10
tr|A0A2W5NP25|A0A2W5NP25_RHOSU	RNA polymerase sigma factor OS	Rhodovulum sulfidophilum OX	0.73472	0.949954	1
tr|A0A2T4J5D5|A0A2T4J5D5_RHOBL	Iron ABC transporter substrate-binding protein OS	Rhodobacter blasticus DSM 2131 OX	0.81243	0.949988	3
tr|A0A1G7RZL1|A0A1G7RZL1_RHOCA	Acetylornithine deacetylase/Succinyl-diaminopimelate desuccinylase OS	Rhodobacter capsulatus OX	0.88579	0.95012	1
tr|A0A318THQ3|A0A318THQ3_9BRAD	Uncharacterized protein DUF3572 OS	Rhodopseudomonas faecalis OX	0.81487	0.950713	1
tr|A0A212R3E2|A0A212R3E2_RHOAC	O-acetylhomoserine sulfhydrylase OS	Rhodoblastus acidophilus OX	0.89253	0.951653	1
tr|Q20X34|Q20X34_RHOPB	SCP2 domain-containing protein OS	Rhodopseudomonas palustris (strain BisB18) OX	0.53754	0.952071	1
tr|A0A318TH70|A0A318TH70_9BRAD	Nitrogen fixation protein NifZ OS	Rhodopseudomonas faecalis OX	0.84718	0.952654	2
tr|A0A318THB0|A0A318THB0_9BRAD	O-acetylhomoserine sulfhydrylase OS	Rhodopseudomonas faecalis OX	0.29669	0.952664	9
tr|A0A318TV55|A0A318TV55_9BRAD	Peptide chain release factor 2 OS	Rhodopseudomonas faecalis OX	0.4691	0.952889	3
tr|A0A318TB09|A0A318TB09_9BRAD	Chaperone protein DnaK OS	Rhodopseudomonas faecalis OX	0.53772	0.952927	10
tr|A0A318TL40|A0A318TL40_9BRAD	Amino acid/amide ABC transporter substrate-binding protein (HAAT family) OS	Rhodopseudomonas faecalis OX	0.80593	0.953504	2
tr|D5ALY9|D5ALY9_RHOCB	30S ribosomal protein S12 OS	Rhodobacter capsulatus (strain ATCC BAA-309 / NBRC 16581 / SB1003) OX	0.81578	0.953661	4
tr|A0A318TDT3|A0A318TDT3_9BRAD	Light-independent protochlorophyllide reductase subunit B OS	Rhodopseudomonas faecalis OX	0.53525	0.954685	10
tr|A0A318TUF3|A0A318TUF3_9BRAD	Parvulin-like PPIase OS	Rhodopseudomonas faecalis OX	0.64143	0.95493	6
tr|A0A318TLY5|A0A318TLY5_9BRAD	NAD(P)-dependent dehydrogenase (Short-subunit alcohol dehydrogenase family) OS	Rhodopseudomonas faecalis OX	0.46008	0.955068	9
tr|A0A318TAN7|A0A318TAN7_9BRAD	Aminoglycoside phosphotransferase (APT) family kinase protein OS	Rhodopseudomonas faecalis OX	0.64921	0.955202	2
tr|A0A4U1JNH7|A0A4U1JNH7_RHOCA	Ribonuclease E OS	Rhodobacter capsulatus OX	0.8987	0.955539	1
tr|A0A318TLE4|A0A318TLE4_9BRAD	Lipoprotein-releasing system ATP-binding protein LolD OS	Rhodopseudomonas faecalis OX	0.78049	0.95577	2
tr|A0A318TDC2|A0A318TDC2_9BRAD	Acyl-CoA synthetase (AMP-forming)/AMP-acid ligase II OS	Rhodopseudomonas faecalis OX	0.52482	0.956151	6
tr|A0A6N9KH87|A0A6N9KH87_CITAM	Glutamate/aspartate ABC transporter substrate-binding protein OS	Citrobacter amalonaticus OX	0.92179	0.956371	1
tr|A0A318TK61|A0A318TK61_9BRAD	Putative peroxidase-related enzyme OS	Rhodopseudomonas faecalis OX	0.83668	0.958257	2
tr|F8WW58|F8WW58_9BACT	Uncharacterized protein OS	Dysgonomonas mossii DSM 22836 OX	0.83578	0.958276	4
tr|A0A318TAE0|A0A318TAE0_9BRAD	Bifunctional protein HldE OS	Rhodopseudomonas faecalis OX	0.67633	0.958648	4
tr|Q07TL1|Q07TL1_RHOP5	Pyruvate flavodoxin/ferredoxin oxidoreductase domain protein OS	Rhodopseudomonas palustris (strain BisA53) OX	0.92298	0.958669	1
tr|O68122|O68122_RHOCA	2-hydroxyhepta-2,4-diene-1, 7-dioateisomerase/5-carboxymethyl-2-oxo-hex-3-ene-1, 7-dioatedecarboxylase OS	Rhodobacter capsulatus OX	0.89032	0.958799	1
tr|A0A318TWX7|A0A318TWX7_9BRAD	Uncharacterized protein OS	Rhodopseudomonas faecalis OX	0.4814	0.960752	6
tr|A0A318THX5|A0A318THX5_9BRAD	Uncharacterized protein OS	Rhodopseudomonas faecalis OX	0.53206	0.960818	1
tr|A0A318TAU7|A0A318TAU7_9BRAD	Putative monooxygenase ydhR OS	Rhodopseudomonas faecalis OX	0.7465	0.960988	3
tr|A0A318TI42|A0A318TI42_9BRAD	Farnesyl-diphosphate synthase OS	Rhodopseudomonas faecalis OX	0.425	0.961318	9
tr|A0A318TB06|A0A318TB06_9BRAD	Alkyl sulfatase BDS1-like metallo-beta-lactamase superfamily hydrolase OS	Rhodopseudomonas faecalis OX	0.73321	0.961837	2
tr|A0A1G7M7L7|A0A1G7M7L7_RHOCA	Ca2+-binding protein, EF-hand superfamily OS	Rhodobacter capsulatus OX	0.90285	0.962355	2
tr|Q13CL0|Q13CL0_RHOPS	Response regulator receiver OS	Rhodopseudomonas palustris (strain BisB5) OX	0.56895	0.962437	1
tr|F8WWF3|F8WWF3_9BACT	Polyribonucleotide nucleotidyltransferase OS	Dysgonomonas mossii DSM 22836 OX	0.86683	0.963016	1
tr|A0A4U1K2V5|A0A4U1K2V5_RHOCA	Tryptophan--tRNA ligase OS	Rhodobacter capsulatus OX	0.87692	0.96315	2
tr|A0A318THU0|A0A318THU0_9BRAD	Uncharacterized protein YjbJ (UPF0337 family) OS	Rhodopseudomonas faecalis OX	0.88042	0.963279	3
tr|D5APJ6|D5APJ6_RHOCB	Cell shape-determining protein MreB OS	Rhodobacter capsulatus (strain ATCC BAA-309 / NBRC 16581 / SB1003) OX	0.7638	0.963403	2
tr|A0A318TRQ0|A0A318TRQ0_9BRAD	UTP--glucose-1-phosphate uridylyltransferase OS	Rhodopseudomonas faecalis OX	0.68339	0.963457	10
tr|A0A1G7KL78|A0A1G7KL78_RHOCA	Cytochrome c1 OS	Rhodobacter capsulatus OX	0.91403	0.963719	5
tr|A0A1G7P8J1|A0A1G7P8J1_RHOCA	Acyl-CoA reductase OS	Rhodobacter capsulatus OX	0.93796	0.963912	1
tr|A0A318TKY8|A0A318TKY8_9BRAD	Starvation-inducible DNA-binding protein OS	Rhodopseudomonas faecalis OX	0.51909	0.964026	6
tr|A0A318TCS0|A0A318TCS0_9BRAD	PH (Pleckstrin Homology) domain-containing protein OS	Rhodopseudomonas faecalis OX	0.84696	0.964089	1
tr|A0A318TJU6|A0A318TJU6_9BRAD	Acrylyl-CoA reductase (NADPH) OS	Rhodopseudomonas faecalis OX	0.79213	0.964099	2
tr|A0A318TIB1|A0A318TIB1_9BRAD	60 kDa chaperonin OS	Rhodopseudomonas faecalis OX	0.76338	0.965459	10
tr|A0A2T4J4Z4|A0A2T4J4Z4_RHOBL	OmpA-like domain-containing protein OS	Rhodobacter blasticus DSM 2131 OX	0.87437	0.965786	1
tr|A0A318T9C8|A0A318T9C8_9BRAD	Monoamine oxidase OS	Rhodopseudomonas faecalis OX	0.7941	0.965975	1
tr|D5ANF0|D5ANF0_RHOCB	Uncharacterized protein OS	Rhodobacter capsulatus (strain ATCC BAA-309 / NBRC 16581 / SB1003) OX	0.92576	0.966278	1
tr|A0A318TJ89|A0A318TJ89_9BRAD	L-threonine aldolase OS	Rhodopseudomonas faecalis OX	0.95239	0.966395	1
tr|A0A318TTW6|A0A318TTW6_9BRAD	Acetyl-CoA C-acetyltransferase/acetyl-CoA acyltransferase OS	Rhodopseudomonas faecalis OX	0.49914	0.966645	9
tr|D5AL52|D5AL52_RHOCB	Electron transfer flavoprotein, alpha subunit OS	Rhodobacter capsulatus (strain ATCC BAA-309 / NBRC 16581 / SB1003) OX	0.96592	0.967003	1
tr|A0A318THW2|A0A318THW2_9BRAD	Microcin-processing peptidase 1 OS	Rhodopseudomonas faecalis OX	0.68788	0.967092	6
tr|A0A318TFT1|A0A318TFT1_9BRAD	3-methylcrotonyl-CoA carboxylase alpha subunit OS	Rhodopseudomonas faecalis OX	0.78284	0.9679	10
tr|A0A0N8VF37|A0A0N8VF37_RHOCA	Tat (Twin-arginine translocation) pathway signal sequence OS	Rhodobacter capsulatus OX	0.86285	0.968307	8
tr|A0A318TLZ5|A0A318TLZ5_9BRAD	Glucokinase OS	Rhodopseudomonas faecalis OX	0.55042	0.968431	3
tr|A0A318TL23|A0A318TL23_9BRAD	Zinc metalloprotease OS	Rhodopseudomonas faecalis OX	0.93288	0.969064	1
tr|A0A285S4N6|A0A285S4N6_9RHOB	Translation initiation factor IF-1 OS	Rhodobacter maris OX	0.92681	0.969246	2
tr|A0A318TB55|A0A318TB55_9BRAD	Queuine tRNA-ribosyltransferase OS	Rhodopseudomonas faecalis OX	0.81743	0.969583	1
tr|A0A318TBL6|A0A318TBL6_9BRAD	Zinc-type alcohol dehydrogenase-like protein OS	Rhodopseudomonas faecalis OX	0.80686	0.969673	4
tr|A0A318TCH4|A0A318TCH4_9BRAD	Flagellar hook-associated protein 1 OS	Rhodopseudomonas faecalis OX	0.85511	0.969692	3
tr|D2TT83|D2TT83_CITRI	Ethanolamine utilization protein OS	Citrobacter rodentium (strain ICC168) OX	0.93806	0.969865	1
tr|A0A318TA82|A0A318TA82_9BRAD	O-acetylhomoserine sulfhydrylase OS	Rhodopseudomonas faecalis OX	0.9257	0.969873	10
tr|A0A318TFD4|A0A318TFD4_9BRAD	PBP family phospholipid-binding protein OS	Rhodopseudomonas faecalis OX	0.74836	0.970023	6
tr|D5APL9|D5APL9_RHOCB	Acetyl-coenzyme A synthetase OS	Rhodobacter capsulatus (strain ATCC BAA-309 / NBRC 16581 / SB1003) OX	0.86541	0.970056	3
tr|A0A318TV67|A0A318TV67_9BRAD	Uncharacterized protein DUF1236 OS	Rhodopseudomonas faecalis OX	0.93371	0.970779	1
tr|A0A318TYV9|A0A318TYV9_9BRAD	Multidrug efflux system membrane fusion protein OS	Rhodopseudomonas faecalis OX	0.74327	0.970924	3
tr|A0A318TCL6|A0A318TCL6_9BRAD	Uncharacterized protein OS	Rhodopseudomonas faecalis OX	0.90076	0.971047	2
tr|Q210H2|Q210H2_RHOPB	Maltose alpha-D-glucosyltransferase OS	Rhodopseudomonas palustris (strain BisB18) OX	0.85503	0.97147	1
tr|A0A318TCR1|A0A318TCR1_9BRAD	(3S)-malyl-CoA thioesterase OS	Rhodopseudomonas faecalis OX	0.57099	0.972068	3
tr|A0A318TE67|A0A318TE67_9BRAD	Phosphoglycerate kinase OS	Rhodopseudomonas faecalis OX	0.6974	0.972183	9
tr|A0A318TFG5|A0A318TFG5_9BRAD	NitT/TauT family transport system substrate-binding protein OS	Rhodopseudomonas faecalis OX	0.82347	0.973364	4
tr|Q07TR3|Q07TR3_RHOP5	UPF0301 protein RPE_0714 OS	Rhodopseudomonas palustris (strain BisA53) OX	0.81072	0.973512	2
tr|A0A318TM80|A0A318TM80_9BRAD	UDP-glucose 4-epimerase OS	Rhodopseudomonas faecalis OX	0.65904	0.973636	1
tr|A0A318TPG1|A0A318TPG1_9BRAD	RNA polymerase sigma-70 factor (ECF subfamily) OS	Rhodopseudomonas faecalis OX	0.9123	0.973908	1
tr|A0A318T8X4|A0A318T8X4_9BRAD	Alpha-1,4 glucan phosphorylase OS	Rhodopseudomonas faecalis OX	0.72421	0.974028	10
tr|A0A318TDX8|A0A318TDX8_9BRAD	Uncharacterized protein OS	Rhodopseudomonas faecalis OX	0.61998	0.974196	5
tr|Q07MF9|Q07MF9_RHOP5	Aminotransferase OS	Rhodopseudomonas palustris (strain BisA53) OX	0.84077	0.974512	2
tr|A0A318TMY4|A0A318TMY4_9BRAD	Histidine phosphotransferase ChpT OS	Rhodopseudomonas faecalis OX	0.53662	0.975727	6
tr|A0A1G7BPY1|A0A1G7BPY1_RHOCA	Basic membrane protein A OS	Rhodobacter capsulatus OX	0.92966	0.975839	8
tr|A0A318TJ07|A0A318TJ07_9BRAD	Aspartyl-tRNA(Asn)/glutamyl-tRNA(Gln) amidotransferase subunit A OS	Rhodopseudomonas faecalis OX	0.70026	0.976239	10
tr|A0A212RNY1|A0A212RNY1_RHOAC	Nitrogen fixation protein NifX OS	Rhodoblastus acidophilus OX	0.88844	0.976274	2
tr|A0A318TDD9|A0A318TDD9_9BRAD	Uroporphyrinogen decarboxylase OS	Rhodopseudomonas faecalis OX	0.58243	0.97636	9
tr|A0A336JIJ6|A0A336JIJ6_9BRAD	Chaperone protein HtpG OS	Rhodopseudomonas pentothenatexigens OX	0.8904	0.976498	2
tr|A0A318TLN6|A0A318TLN6_9BRAD	NAD(P)-dependent dehydrogenase (Short-subunit alcohol dehydrogenase family) OS	Rhodopseudomonas faecalis OX	0.67251	0.976633	10
tr|F8WVT6|F8WVT6_9BACT	50S ribosomal protein L5 OS	Dysgonomonas mossii DSM 22836 OX	0.8494	0.97673	1
tr|A0A318TJM3|A0A318TJM3_9BRAD	Uncharacterized protein DUF1849 OS	Rhodopseudomonas faecalis OX	0.79115	0.976833	8
tr|A0A2T4J745|A0A2T4J745_RHOBL	60 kDa chaperonin OS	Rhodobacter blasticus DSM 2131 OX	0.92988	0.977037	6
tr|A0A318T8W4|A0A318T8W4_9BRAD	Uncharacterized protein OS	Rhodopseudomonas faecalis OX	0.80643	0.977171	6
tr|A0A318TD33|A0A318TD33_9BRAD	Transcription elongation factor GreA OS	Rhodopseudomonas faecalis OX	0.95988	0.977243	1
tr|A0A318T9H8|A0A318T9H8_9BRAD	UDP-N-acetylmuramoylalanine--D-glutamate ligase OS	Rhodopseudomonas faecalis OX	0.81558	0.977268	4
tr|A0A318TJS0|A0A318TJS0_9BRAD	Hippurate hydrolase OS	Rhodopseudomonas faecalis OX	0.89518	0.977675	4
tr|A0A4U1K461|A0A4U1K461_RHOCA	Aspartate/tyrosine/aromatic aminotransferase OS	Rhodobacter capsulatus OX	0.89937	0.977741	1
tr|A0A318T765|A0A318T765_9BRAD	Aspartate aminotransferase OS	Rhodopseudomonas faecalis OX	0.86539	0.978107	10
tr|Q2J0F7|Q2J0F7_RHOP2	Glutathione-dependent peroxiredoxin OS	Rhodopseudomonas palustris (strain HaA2) OX	0.72281	0.978295	1
tr|A0A318TMV2|A0A318TMV2_9BRAD	RimJ/RimL family protein N-acetyltransferase OS	Rhodopseudomonas faecalis OX	0.79295	0.978572	5
tr|A0A318U6T3|A0A318U6T3_9RHOB	Alanine--tRNA ligase OS	Rhodobacter viridis OX	0.94126	0.978591	1
tr|A0A2T4J5P6|A0A2T4J5P6_RHOBL	Phosphoribosylformylglycinamidine synthase subunit PurS OS	Rhodobacter blasticus DSM 2131 OX	0.89381	0.978654	1
tr|A0A0Q0V973|A0A0Q0V973_RHOCA	50S ribosomal protein L16 OS	Rhodobacter capsulatus OX	0.91751	0.978943	4
tr|A0A318TLP9|A0A318TLP9_9BRAD	Amino acid/amide ABC transporter ATP-binding protein 2 (HAAT family) OS	Rhodopseudomonas faecalis OX	0.90631	0.979063	1
tr|A0A318TFJ8|A0A318TFJ8_9BRAD	Sulfite reductase (NADPH) hemoprotein beta-component OS	Rhodopseudomonas faecalis OX	0.84688	0.979402	8
tr|A0A318TIK8|A0A318TIK8_9BRAD	Uncharacterized protein OS	Rhodopseudomonas faecalis OX	0.86326	0.979528	5
tr|A0A318TTC1|A0A318TTC1_9BRAD	Rhodanese-related sulfurtransferase OS	Rhodopseudomonas faecalis OX	0.79515	0.979617	2
tr|A0A318TEA6|A0A318TEA6_9BRAD	Cytochrome b561 OS	Rhodopseudomonas faecalis OX	0.92532	0.980197	1
tr|A0A318TLT2|A0A318TLT2_9BRAD	Multidrug efflux pump OS	Rhodopseudomonas faecalis OX	0.79799	0.980541	3
tr|A0A318TGJ9|A0A318TGJ9_9BRAD	KipI family sensor histidine kinase inhibitor OS	Rhodopseudomonas faecalis OX	0.8967	0.980541	1
tr|A0A318TDR2|A0A318TDR2_9BRAD	Glycogen operon protein OS	Rhodopseudomonas faecalis OX	0.91108	0.981034	5
tr|A0A318TB50|A0A318TB50_9BRAD	Shikimate dehydrogenase (NADP(+)) OS	Rhodopseudomonas faecalis OX	0.72963	0.981074	3
tr|A0A318TH30|A0A318TH30_9BRAD	Zinc protease OS	Rhodopseudomonas faecalis OX	0.83913	0.981183	5
tr|A0A318TR64|A0A318TR64_9BRAD	Sporulation related protein OS	Rhodopseudomonas faecalis OX	0.77843	0.981432	4
tr|A0A1G7BU21|A0A1G7BU21_RHOCA	Tol-Pal system protein TolB OS	Rhodobacter capsulatus OX	0.88643	0.98144	3
tr|A0A318THK2|A0A318THK2_9BRAD	Uncharacterized protein OS	Rhodopseudomonas faecalis OX	0.95749	0.981717	1
tr|A0A318THW6|A0A318THW6_9BRAD	Alcohol dehydrogenase OS	Rhodopseudomonas faecalis OX	0.73633	0.981886	5
tr|A0A2T4JF53|A0A2T4JF53_RHOBL	Porin_4 domain-containing protein OS	Rhodobacter blasticus DSM 2131 OX	0.95256	0.982098	1
tr|A0A318TFC6|A0A318TFC6_9BRAD	HemY protein OS	Rhodopseudomonas faecalis OX	0.82083	0.98232	8
tr|R8X0U3|R8X0U3_9ENTR	50S ribosomal protein L32 OS	Citrobacter sp. KTE151 OX	0.94808	0.982625	1
tr|A0A318TIC8|A0A318TIC8_9BRAD	Fe-S cluster assembly ATP-binding protein OS	Rhodopseudomonas faecalis OX	0.91027	0.982721	5
tr|D5ALC7|D5ALC7_RHOCB	Arginine biosynthesis bifunctional protein ArgJ OS	Rhodobacter capsulatus (strain ATCC BAA-309 / NBRC 16581 / SB1003) OX	0.90319	0.982937	6
tr|A0A318TAR1|A0A318TAR1_9BRAD	OOP family OmpA-OmpF porin OS	Rhodopseudomonas faecalis OX	0.77389	0.983263	8
tr|A0A318T9L8|A0A318T9L8_9BRAD	50S ribosomal protein L21 OS	Rhodopseudomonas faecalis OX	0.91075	0.983312	4
tr|A0A318TIW2|A0A318TIW2_9BRAD	RNA polymerase sigma factor RpoD OS	Rhodopseudomonas faecalis OX	0.79285	0.983437	5
tr|D5AQ14|D5AQ14_RHOCB	Cobaltochelatase, CobS subunit OS	Rhodobacter capsulatus (strain ATCC BAA-309 / NBRC 16581 / SB1003) OX	0.93885	0.983565	1
tr|A0A2T4J5R6|A0A2T4J5R6_RHOBL	50S ribosomal protein L21 OS	Rhodobacter blasticus DSM 2131 OX	0.95178	0.983831	1
tr|A0A2T4JB38|A0A2T4JB38_RHOBL	50S ribosomal protein L13 OS	Rhodobacter blasticus DSM 2131 OX	0.95865	0.98457	1
tr|A0A318TCD8|A0A318TCD8_9BRAD	3'(2'),5'-bisphosphate nucleotidase CysQ OS	Rhodopseudomonas faecalis OX	0.83454	0.984659	5
tr|A0A318TK87|A0A318TK87_9BRAD	Aldehyde dehydrogenase (NAD+) OS	Rhodopseudomonas faecalis OX	0.85567	0.984821	9
tr|A0A318TDG3|A0A318TDG3_9BRAD	Bifunctional protein FolD OS	Rhodopseudomonas faecalis OX	0.8335	0.984902	8
tr|A0A1G7HVU9|A0A1G7HVU9_RHOCA	Trigger factor OS	Rhodobacter capsulatus OX	0.97992	0.984905	1
tr|A0A318TLT8|A0A318TLT8_9BRAD	NADH-quinone oxidoreductase subunit C OS	Rhodopseudomonas faecalis OX	0.86376	0.984975	2
tr|A0A318TU40|A0A318TU40_9BRAD	ATP-binding protein Uup OS	Rhodopseudomonas faecalis OX	0.90358	0.985867	3
tr|A0A318THG8|A0A318THG8_9BRAD	ATP synthase subunit beta OS	Rhodopseudomonas faecalis OX	0.7141	0.986302	10
tr|A0A318T7B7|A0A318T7B7_9BRAD	UDP-glucose 6-dehydrogenase OS	Rhodopseudomonas faecalis OX	0.86755	0.986373	5
tr|A0A318TEI8|A0A318TEI8_9BRAD	Winged helix family two component transcriptional regulator OS	Rhodopseudomonas faecalis OX	0.91664	0.986429	1
tr|A0A2T4JAX5|A0A2T4JAX5_RHOBL	30S ribosomal protein S2 OS	Rhodobacter blasticus DSM 2131 OX	0.96045	0.986515	1
tr|A0A318TBG4|A0A318TBG4_9BRAD	Pyruvate carboxylase OS	Rhodopseudomonas faecalis OX	0.86048	0.986726	10
tr|A0A1N7KVN8|A0A1N7KVN8_9RHOB	Phosphoenolpyruvate carboxykinase (ATP) OS	Rhodobacter vinaykumarii OX	0.95737	0.986801	2
tr|A0A318TJ06|A0A318TJ06_9BRAD	Peptidyl-prolyl cis-trans isomerase OS	Rhodopseudomonas faecalis OX	0.81962	0.986876	10
tr|A0A318T9Q5|A0A318T9Q5_9BRAD	Gamma-glutamyltransferase 2 OS	Rhodopseudomonas faecalis OX	0.90311	0.986928	2
tr|A0A318TA46|A0A318TA46_9BRAD	6,7-dimethyl-8-ribityllumazine synthase OS	Rhodopseudomonas faecalis OX	0.87657	0.986981	2
tr|A0A318TF39|A0A318TF39_9BRAD	ATP-dependent protease ATPase subunit HslU OS	Rhodopseudomonas faecalis OX	0.83143	0.986994	4
tr|A0A318T8E4|A0A318T8E4_9BRAD	Periplasmic serine endoprotease DegP-like OS	Rhodopseudomonas faecalis OX	0.86319	0.98716	10
tr|A0A0Q0QM51|A0A0Q0QM51_RHOCA	Glutamine synthetase OS	Rhodobacter capsulatus OX	0.96566	0.98728	6
tr|A0A318TJ16|A0A318TJ16_9BRAD	Methionine--tRNA ligase OS	Rhodopseudomonas faecalis OX	0.88465	0.987327	9
tr|A0A318T852|A0A318T852_9BRAD	Phosphate regulon transcriptional regulatory protein PhoB OS	Rhodopseudomonas faecalis OX	0.93551	0.987448	4
tr|A0A318TAL9|A0A318TAL9_9BRAD	Uncharacterized protein OS	Rhodopseudomonas faecalis OX	0.83453	0.988135	9
tr|A0A318TNY1|A0A318TNY1_9BRAD	Porin OS	Rhodopseudomonas faecalis OX	0.94871	0.988628	5
tr|A0A318TDQ0|A0A318TDQ0_9BRAD	Magnesium chelatase accessory protein OS	Rhodopseudomonas faecalis OX	0.9546	0.988643	1
tr|A0A1H8VUG6|A0A1H8VUG6_9BRAD	60 kDa chaperonin OS	Rhodopseudomonas pseudopalustris OX	0.95331	0.989247	6
tr|A0A318TBQ6|A0A318TBQ6_9BRAD	Histidine kinase OS	Rhodopseudomonas faecalis OX	0.91123	0.989593	1
tr|A0A318TGF1|A0A318TGF1_9BRAD	4-hydroxy-tetrahydrodipicolinate synthase OS	Rhodopseudomonas faecalis OX	0.86631	0.990002	10
tr|A0A318TTZ6|A0A318TTZ6_9BRAD	Uncharacterized protein (DUF2147 family) OS	Rhodopseudomonas faecalis OX	0.85669	0.990203	5
tr|A0A6L8YAS7|A0A6L8YAS7_CITAM	Aldehyde dehydrogenase family protein (Fragment) OS	Citrobacter amalonaticus OX	0.95842	0.990208	2
tr|A0A318TM58|A0A318TM58_9BRAD	ADP-ribose pyrophosphatase YjhB (NUDIX family) OS	Rhodopseudomonas faecalis OX	0.95379	0.991152	1
tr|A0A4U1K2R4|A0A4U1K2R4_RHOCA	Beta sliding clamp OS	Rhodobacter capsulatus OX	0.96921	0.991266	3
tr|A0A318TFV1|A0A318TFV1_9BRAD	Lytic murein transglycosylase OS	Rhodopseudomonas faecalis OX	0.92462	0.991297	1
tr|A0A318TA47|A0A318TA47_9BRAD	2Fe-2S ferredoxin OS	Rhodopseudomonas faecalis OX	0.93284	0.991335	1
tr|A0A318TJV5|A0A318TJV5_9BRAD	Ribonuclease PH OS	Rhodopseudomonas faecalis OX	0.93266	0.991981	3
tr|A0A318TKW3|A0A318TKW3_9BRAD	UPF0178 protein BJ122_101125 OS	Rhodopseudomonas faecalis OX	0.98888	0.992722	1
tr|A0A318TGW9|A0A318TGW9_9BRAD	Putative heparinase superfamily protein OS	Rhodopseudomonas faecalis OX	0.92376	0.992753	1
tr|A0A318TIT8|A0A318TIT8_9BRAD	DNA polymerase III subunit gamma/tau OS	Rhodopseudomonas faecalis OX	0.96108	0.992857	2
tr|A0A318TKP8|A0A318TKP8_9BRAD	Putative proteasome-type protease OS	Rhodopseudomonas faecalis OX	0.92336	0.993235	4
tr|A0A0Q0VHT0|A0A0Q0VHT0_RHOCA	Chaperone protein DnaK OS	Rhodobacter capsulatus OX	0.97616	0.993446	7
tr|A0A318T7H8|A0A318T7H8_9BRAD	Beta sliding clamp OS	Rhodopseudomonas faecalis OX	0.93654	0.994368	9
tr|A0A318TRE0|A0A318TRE0_9BRAD	Elongation factor 4 OS	Rhodopseudomonas faecalis OX	0.94588	0.994396	4
tr|A0A318TJ00|A0A318TJ00_9BRAD	Biopolymer transport protein ExbB OS	Rhodopseudomonas faecalis OX	0.96873	0.994411	1
tr|A0A318TWM7|A0A318TWM7_9RHOB	Acetyl-CoA acetyltransferase OS	Rhodobacter viridis OX	0.9918	0.994411	1
tr|A0A318TI69|A0A318TI69_9BRAD	Indolepyruvate oxidoreductase subunit IorA OS	Rhodopseudomonas faecalis OX	0.97284	0.994723	10
tr|A0A318TCD7|A0A318TCD7_9BRAD	NAD(P) transhydrogenase subunit beta OS	Rhodopseudomonas faecalis OX	0.96423	0.994764	9
tr|A0A318TI21|A0A318TI21_9BRAD	Peroxiredoxin Q/BCP OS	Rhodopseudomonas faecalis OX	0.96332	0.994962	6
tr|A0A1G7LFS8|A0A1G7LFS8_RHOCA	Elongation factor G OS	Rhodobacter capsulatus OX	0.98731	0.995076	7
sp|Q20ZR6|GREA_RHOPB	Transcription elongation factor GreA OS	Rhodopseudomonas palustris (strain BisB18) OX	0.96745	0.995121	1
tr|A0A318TA84|A0A318TA84_9BRAD	Argininosuccinate synthase OS	Rhodopseudomonas faecalis OX	0.95841	0.996008	7
tr|A0A318TKX9|A0A318TKX9_9BRAD	Ribosome-recycling factor OS	Rhodopseudomonas faecalis OX	0.93821	0.99633	10
tr|A0A318TFY1|A0A318TFY1_9BRAD	Hydroxymethylbilane synthase OS	Rhodopseudomonas faecalis OX	0.94369	0.996366	10
tr|A0A318TJB1|A0A318TJB1_9BRAD	3-oxoadipate enol-lactonase OS	Rhodopseudomonas faecalis OX	0.96567	0.996424	2
tr|A0A318TFJ7|A0A318TFJ7_9BRAD	tRNA-Thr(GGU) m(6)t(6)A37 methyltransferase TsaA OS	Rhodopseudomonas faecalis OX	0.98134	0.996877	2
tr|A0A336JMH5|A0A336JMH5_9BRAD	Sulfide dehydrogenase (Flavoprotein) subunit SudA /sulfide dehydrogenase (Flavoprotein) subunit SudB OS	Rhodopseudomonas pentothenatexigens OX	0.98683	0.996895	1
tr|A0A318TAN1|A0A318TAN1_9BRAD	3-deoxy-manno-octulosonate cytidylyltransferase OS	Rhodopseudomonas faecalis OX	0.97687	0.997174	1
tr|A0A318TNV5|A0A318TNV5_9BRAD	DNA mismatch repair protein MutS OS	Rhodopseudomonas faecalis OX	0.98722	0.997318	2
tr|Q07QG8|Q07QG8_RHOP5	Transcriptional regulator, MucR family OS	Rhodopseudomonas palustris (strain BisA53) OX	0.98377	0.997638	4
tr|A0A0H5BK68|A0A0H5BK68_BLAVI	Elongation factor Tu OS	Blastochloris viridis OX	0.98863	0.998272	2
tr|A0A0Q0QK62|A0A0Q0QK62_RHOCA	DNA-binding protein H-NS OS	Rhodobacter capsulatus OX	0.99638	0.998295	3
tr|Q07V13|Q07V13_RHOP5	DUF1330 domain-containing protein OS	Rhodopseudomonas palustris (strain BisA53) OX	0.99425	0.998531	1
tr|A0A318TY36|A0A318TY36_9BRAD	Localization factor PodJL OS	Rhodopseudomonas faecalis OX	0.99359	0.998838	4
tr|A0A318TUM5|A0A318TUM5_9BRAD	TPR_21 domain-containing protein OS	Rhodopseudomonas faecalis OX	0.98498	0.998953	5
tr|A0A318TQK2|A0A318TQK2_9BRAD	60 kDa chaperonin OS	Rhodopseudomonas faecalis OX	0.99385	0.999092	9
tr|A0A318TE17|A0A318TE17_9BRAD	Acyl-CoA thioester hydrolase OS	Rhodopseudomonas faecalis OX	0.99812	0.999224	1
tr|A0A318TFY9|A0A318TFY9_9BRAD	Phytoene desaturase OS	Rhodopseudomonas faecalis OX	0.99622	0.999541	10
tr|A0A318TBL9|A0A318TBL9_9BRAD	HSP20 family molecular chaperone IbpA OS	Rhodopseudomonas faecalis OX	0.99643	0.999573	5
tr|A0A318TTH3|A0A318TTH3_9BRAD	Invasion protein IalB OS	Rhodopseudomonas faecalis OX	0.99786	0.999765	2
tr|A0A318T9M0|A0A318T9M0_9BRAD	D-alanine--D-alanine ligase OS	Rhodopseudomonas faecalis OX	0.9991	0.99991	6
tr|A0A318TS07|A0A318TS07_9BRAD	Aminotransferase OS	Rhodopseudomonas faecalis OX	0.99602	1.00054	2
tr|A0A318TN75|A0A318TN75_9BRAD	Flp pilus assembly protein TadG OS	Rhodopseudomonas faecalis OX	0.99363	1.00066	6
tr|A0A0Q0QY99|A0A0Q0QY99_RHOCA	Orotidine 5'-phosphate decarboxylase OS	Rhodobacter capsulatus OX	0.99742	1.0008	1
tr|A0A318TB31|A0A318TB31_9BRAD	Uncharacterized protein OS	Rhodopseudomonas faecalis OX	0.985	1.0009	3
tr|A0A318TG07|A0A318TG07_9BRAD	Uncharacterized protein DUF3222 OS	Rhodopseudomonas faecalis OX	0.99468	1.00119	2
tr|D5AN41|D5AN41_RHOCB	Biotin carboxyl carrier protein of acetyl-CoA carboxylase OS	Rhodobacter capsulatus (strain ATCC BAA-309 / NBRC 16581 / SB1003) OX	0.99671	1.00166	1
tr|A0A318TDE9|A0A318TDE9_9BRAD	Histidine kinase OS	Rhodopseudomonas faecalis OX	0.99209	1.00179	3
tr|A0A318TGY0|A0A318TGY0_9BRAD	Adenine phosphoribosyltransferase OS	Rhodopseudomonas faecalis OX	0.97813	1.00219	1
tr|A0A318TXR9|A0A318TXR9_9BRAD	3-deoxy-D-manno-octulosonic acid transferase OS	Rhodopseudomonas faecalis OX	0.98639	1.00233	1
tr|A0A318TJ49|A0A318TJ49_9BRAD	Dihydropteroate synthase OS	Rhodopseudomonas faecalis OX	0.97423	1.00233	9
tr|A0A318TBQ4|A0A318TBQ4_9BRAD	Chromosome segregation DNA-binding protein OS	Rhodopseudomonas faecalis OX	0.97333	1.00246	6
tr|A0A318TQ69|A0A318TQ69_9BRAD	Pyruvate, orthophosphate dikinase OS	Rhodopseudomonas faecalis OX	0.96788	1.00328	10
tr|A0A318TJF3|A0A318TJF3_9BRAD	Adenylosuccinate synthetase OS	Rhodopseudomonas faecalis OX	0.9121	1.00346	9
tr|A0A318TND8|A0A318TND8_9BRAD	CreA protein OS	Rhodopseudomonas faecalis OX	0.96143	1.00353	3
tr|A0A318TGM4|A0A318TGM4_9BRAD	Cell division protein ZapA OS	Rhodopseudomonas faecalis OX	0.97458	1.00372	1
tr|A0A318TR55|A0A318TR55_9BRAD	Uncharacterized protein DUF5076 OS	Rhodopseudomonas faecalis OX	0.95073	1.00396	1
tr|A0A318TCC0|A0A318TCC0_9BRAD	Succinate semialdehyde dehydrogenase OS	Rhodopseudomonas faecalis OX	0.9622	1.00443	10
tr|A0A318TFI6|A0A318TFI6_9BRAD	ModE family transcriptional regulator OS	Rhodopseudomonas faecalis OX	0.97835	1.00495	1
tr|A0A318TL57|A0A318TL57_9BRAD	Glutamate--cysteine ligase OS	Rhodopseudomonas faecalis OX	0.98247	1.00511	3
tr|A0A318TBK0|A0A318TBK0_9BRAD	Uncharacterized protein OS	Rhodopseudomonas faecalis OX	0.95104	1.00526	3
tr|A0A318TBU4|A0A318TBU4_9BRAD	Bifunctional uridylyltransferase/uridylyl-removing enzyme OS	Rhodopseudomonas faecalis OX	0.97696	1.00528	1
tr|A0A2T4J8N0|A0A2T4J8N0_RHOBL	50S ribosomal protein L6 OS	Rhodobacter blasticus DSM 2131 OX	0.98363	1.00538	1
tr|A0A318TCL8|A0A318TCL8_9BRAD	L-threonine ammonia-lyase OS	Rhodopseudomonas faecalis OX	0.93703	1.00591	3
tr|A0A318TEC5|A0A318TEC5_9BRAD	Uncharacterized protein OS	Rhodopseudomonas faecalis OX	0.97425	1.00665	2
tr|A0A318TLX3|A0A318TLX3_9BRAD	Squalene-associated FAD-dependent desaturase OS	Rhodopseudomonas faecalis OX	0.92128	1.00667	5
tr|A0A6P1N9D0|A0A6P1N9D0_9ENTR	DNA breaking-rejoining protein OS	Citrobacter sp. LUTT5 OX	0.98027	1.00667	1
tr|A0A4U1JR68|A0A4U1JR68_RHOCA	Uncharacterized protein OS	Rhodobacter capsulatus OX	0.97066	1.00726	1
tr|A0A318TGI6|A0A318TGI6_9BRAD	Fructose-1,6-bisphosphatase class 1 OS	Rhodopseudomonas faecalis OX	0.93724	1.00729	8
tr|A0A318TGF8|A0A318TGF8_9BRAD	Flavin prenyltransferase UbiX OS	Rhodopseudomonas faecalis OX	0.90059	1.00757	2
tr|A0A318T966|A0A318T966_9BRAD	ATP synthase gamma chain OS	Rhodopseudomonas faecalis OX	0.92172	1.00761	10
tr|A0A2T4JAW0|A0A2T4JAW0_RHOBL	Glutamine synthetase OS	Rhodobacter blasticus DSM 2131 OX	0.97632	1.00776	4
tr|A0A318TI22|A0A318TI22_9BRAD	Phosphate starvation-inducible protein PhoH OS	Rhodopseudomonas faecalis OX	0.94065	1.00809	2
tr|A0A318T932|A0A318T932_9BRAD	3-oxoacyl-[acyl-carrier protein] reductase OS	Rhodopseudomonas faecalis OX	0.92871	1.00832	3
tr|A0A318TCV2|A0A318TCV2_9BRAD	50S ribosomal protein L7/L12 OS	Rhodopseudomonas faecalis OX	0.88929	1.00866	10
tr|A0A318TJL8|A0A318TJL8_9BRAD	Hydroxyacylglutathione hydrolase OS	Rhodopseudomonas faecalis OX	0.93591	1.0088	1
tr|A0A318TN51|A0A318TN51_9BRAD	30S ribosomal protein S20 OS	Rhodopseudomonas faecalis OX	0.9498	1.0088	5
tr|A0A318T9R0|A0A318T9R0_9BRAD	Cell division protein FtsZ OS	Rhodopseudomonas faecalis OX	0.93669	1.00899	10
tr|A0A318TIY6|A0A318TIY6_9BRAD	Amino acid/amide ABC transporter ATP-binding protein 1 (HAAT family) OS	Rhodopseudomonas faecalis OX	0.96515	1.00911	3
tr|A0A318TD17|A0A318TD17_9BRAD	DnaJ-class molecular chaperone OS	Rhodopseudomonas faecalis OX	0.89209	1.00944	6
tr|A0A318TAK8|A0A318TAK8_9BRAD	Citrate lyase subunit beta/citryl-CoA lyase OS	Rhodopseudomonas faecalis OX	0.8694	1.00947	9
tr|A0A318T9T3|A0A318T9T3_9BRAD	Glycerol-3-phosphate dehydrogenase [NAD(P)+] OS	Rhodopseudomonas faecalis OX	0.93864	1.00973	4
tr|A0A318TD30|A0A318TD30_9BRAD	Phosphoribosylamine--glycine ligase OS	Rhodopseudomonas faecalis OX	0.91535	1.00994	5
tr|A0A318TDB4|A0A318TDB4_9BRAD	Holliday junction ATP-dependent DNA helicase RuvB OS	Rhodopseudomonas faecalis OX	0.94189	1.00996	2
tr|A0A4V5PNX5|A0A4V5PNX5_RHOCA	Protein HflK OS	Rhodobacter capsulatus OX	0.9491	1.01002	1
tr|A0A2T4JFM5|A0A2T4JFM5_RHOBL	Thioredoxin OS	Rhodobacter blasticus DSM 2131 OX	0.97189	1.01011	1
tr|D5ANX4|D5ANX4_RHOCB	Uncharacterized protein OS	Rhodobacter capsulatus (strain ATCC BAA-309 / NBRC 16581 / SB1003) OX	0.97648	1.01095	2
tr|A0A6M1MJS1|A0A6M1MJS1_9RHOB	50S ribosomal protein L7/L12 OS	Rhodobacter sp. SGA-6-6 OX	0.97427	1.01105	1
tr|A0A318TPR0|A0A318TPR0_9BRAD	UvrABC system protein A OS	Rhodopseudomonas faecalis OX	0.92965	1.0114	8
tr|A0A318TQC0|A0A318TQC0_9BRAD	Bifunctional enzyme IspD/IspF OS	Rhodopseudomonas faecalis OX	0.78479	1.01167	10
tr|A0A318TJN9|A0A318TJN9_9BRAD	Phosphatidylserine decarboxylase proenzyme OS	Rhodopseudomonas faecalis OX	0.94191	1.01171	1
tr|A0A318TGJ2|A0A318TGJ2_9BRAD	Succinyl-diaminopimelate desuccinylase OS	Rhodopseudomonas faecalis OX	0.87854	1.01179	3
tr|A0A318TBP2|A0A318TBP2_9BRAD	Creatinine amidohydrolase OS	Rhodopseudomonas faecalis OX	0.88462	1.01184	2
tr|A0A318T9W3|A0A318T9W3_9BRAD	Cytochrome-dependent sulfide dehydrogenase (Flavoprotein) OS	Rhodopseudomonas faecalis OX	0.93746	1.01232	10
tr|A0A318T7X4|A0A318T7X4_9BRAD	ATP-dependent RNA helicase SUPV3L1/SUV3 OS	Rhodopseudomonas faecalis OX	0.80847	1.01245	10
tr|A0A318TS96|A0A318TS96_9BRAD	Putative phosphodiesterase OS	Rhodopseudomonas faecalis OX	0.94475	1.01296	1
tr|Q07PW5|Q07PW5_RHOP5	FAD-dependent pyridine nucleotide-disulphide oxidoreductase OS	Rhodopseudomonas palustris (strain BisA53) OX	0.94117	1.01308	1
tr|A0A318TCM3|A0A318TCM3_9BRAD	Uncharacterized protein OS	Rhodopseudomonas faecalis OX	0.95907	1.01309	1
tr|E6VMJ0|E6VMJ0_RHOPX	Protein HflC OS	Rhodopseudomonas palustris (strain DX-1) OX	0.93382	1.01311	1
tr|A0A1G7FK35|A0A1G7FK35_RHOCA	Uncharacterized protein OS	Rhodobacter capsulatus OX	0.95651	1.01313	1
tr|A0A318TQS7|A0A318TQS7_9BRAD	Chitooligosaccharide deacetylase OS	Rhodopseudomonas faecalis OX	0.94372	1.01362	10
tr|A0A318TF07|A0A318TF07_9BRAD	Uncharacterized protein OS	Rhodopseudomonas faecalis OX	0.92235	1.01377	1
tr|A0A318TCK0|A0A318TCK0_9BRAD	Putative lipid-binding transport protein (Tim44 family) OS	Rhodopseudomonas faecalis OX	0.88185	1.01388	3
tr|A0A318TKZ3|A0A318TKZ3_9BRAD	NADH dehydrogenase subunit E OS	Rhodopseudomonas faecalis OX	0.80366	1.01442	6
tr|A0A318TP36|A0A318TP36_9BRAD	Lipoprotein-anchoring transpeptidase ErfK/SrfK OS	Rhodopseudomonas faecalis OX	0.94408	1.01461	1
tr|A0A318T8P6|A0A318T8P6_9BRAD	AsnC family transcriptional regulator OS	Rhodopseudomonas faecalis OX	0.95113	1.01473	10
tr|A0A318TEC6|A0A318TEC6_9BRAD	Orotidine 5'-phosphate decarboxylase OS	Rhodopseudomonas faecalis OX	0.91928	1.01502	3
tr|A0A318TAY6|A0A318TAY6_9BRAD	Probable GTP-binding protein EngB OS	Rhodopseudomonas faecalis OX	0.8471	1.01517	4
tr|A0A318TGU2|A0A318TGU2_9BRAD	Amino acid/amide ABC transporter substrate-binding protein (HAAT family) OS	Rhodopseudomonas faecalis OX	0.92852	1.01537	9
tr|A0A1G7MUK7|A0A1G7MUK7_RHOCA	C4-dicarboxylate-binding protein DctP OS	Rhodobacter capsulatus OX	0.94386	1.01562	3
tr|A0A0Q0UF27|A0A0Q0UF27_RHOCA	50S ribosomal protein L28 OS	Rhodobacter capsulatus OX	0.95998	1.0158	2
tr|A0A318TRB2|A0A318TRB2_9BRAD	Cysteine synthase A OS	Rhodopseudomonas faecalis OX	0.88664	1.01601	6
tr|A0A318TCD3|A0A318TCD3_9BRAD	3-phosphoshikimate 1-carboxyvinyltransferase OS	Rhodopseudomonas faecalis OX	0.85681	1.01615	6
tr|A0A318THH0|A0A318THH0_9BRAD	Thioredoxin reductase OS	Rhodopseudomonas faecalis OX	0.8969	1.01648	1
tr|A0A318TAI3|A0A318TAI3_9BRAD	Cysteine synthase OS	Rhodopseudomonas faecalis OX	0.95003	1.01665	8
tr|A0A318TIK4|A0A318TIK4_9BRAD	Fructose-1,6-bisphosphate aldolase OS	Rhodopseudomonas faecalis OX	0.8377	1.01666	10
tr|A0A336JR89|A0A336JR89_9BRAD	Ketol-acid reductoisomerase (NADP(+)) OS	Rhodopseudomonas pentothenatexigens OX	0.91665	1.01731	1
tr|E6VBV1|E6VBV1_RHOPX	30S ribosomal protein S12 OS	Rhodopseudomonas palustris (strain DX-1) OX	0.87151	1.01734	10
tr|A0A318TKU7|A0A318TKU7_9BRAD	Nitrous-oxide reductase OS	Rhodopseudomonas faecalis OX	0.90484	1.01751	1
tr|A0A318T822|A0A318T822_9BRAD	3-hydroxydecanoyl-[acyl-carrier-protein] dehydratase OS	Rhodopseudomonas faecalis OX	0.86224	1.01767	3
tr|A0A318TF30|A0A318TF30_9BRAD	Ribonuclease E OS	Rhodopseudomonas faecalis OX	0.77489	1.01769	10
tr|A0A318TKA4|A0A318TKA4_9BRAD	Uncharacterized protein OS	Rhodopseudomonas faecalis OX	0.82327	1.01772	3
tr|A0A318TJ47|A0A318TJ47_9BRAD	Uncharacterized protein OS	Rhodopseudomonas faecalis OX	0.88425	1.01776	1
tr|A0A318TAA1|A0A318TAA1_9BRAD	Uncharacterized protein OS	Rhodopseudomonas faecalis OX	0.90243	1.01777	1
tr|A0A318TLH8|A0A318TLH8_9BRAD	Anthranilate phosphoribosyltransferase OS	Rhodopseudomonas faecalis OX	0.71292	1.01778	9
tr|A0A318T8L6|A0A318T8L6_9BRAD	Transcription termination/antitermination protein NusA OS	Rhodopseudomonas faecalis OX	0.78712	1.01796	9
tr|A0A318TR99|A0A318TR99_9BRAD	Beta-alanine--pyruvate transaminase OS	Rhodopseudomonas faecalis OX	0.84528	1.01799	10
tr|A0A318TM02|A0A318TM02_9BRAD	GFA domain-containing protein OS	Rhodopseudomonas faecalis OX	0.89495	1.01827	2
tr|F8WZ63|F8WZ63_9BACT	10 kDa chaperonin OS	Dysgonomonas mossii DSM 22836 OX	0.93964	1.01919	1
tr|A0A318T747|A0A318T747_9BRAD	EF hand domain-containing protein OS	Rhodopseudomonas faecalis OX	0.94571	1.01929	3
tr|A0A1M4TAR8|A0A1M4TAR8_9BACT	Elongation factor Tu OS	Dysgonomonas macrotermitis OX	0.94375	1.01946	1
tr|A0A318TKQ1|A0A318TKQ1_9BRAD	7-carboxy-7-deazaguanine synthase OS	Rhodopseudomonas faecalis OX	0.91701	1.01959	1
tr|A0A318TE19|A0A318TE19_9BRAD	3-oxoacyl-[acyl-carrier protein] reductase OS	Rhodopseudomonas faecalis OX	0.89367	1.0198	3
tr|E6VPK5|E6VPK5_RHOPX	Sulfate ABC transporter, periplasmic sulfate-binding protein OS	Rhodopseudomonas palustris (strain DX-1) OX	0.86156	1.02016	1
tr|D5AUJ0|D5AUJ0_RHOCB	Hydrolase, alpha/beta fold family OS	Rhodobacter capsulatus (strain ATCC BAA-309 / NBRC 16581 / SB1003) OX	0.9437	1.02018	1
tr|A0A318T986|A0A318T986_9BRAD	Enoyl-[acyl-carrier-protein] reductase [NADH] OS	Rhodopseudomonas faecalis OX	0.70791	1.02084	8
tr|A0A318TPG9|A0A318TPG9_9BRAD	Delta-aminolevulinic acid dehydratase OS	Rhodopseudomonas faecalis OX	0.79485	1.02106	10
tr|A0A318T9I3|A0A318T9I3_9BRAD	ATP synthase subunit alpha OS	Rhodopseudomonas faecalis OX	0.57496	1.02126	10
tr|A0A318TLX9|A0A318TLX9_9BRAD	Citrate synthase OS	Rhodopseudomonas faecalis OX	0.82156	1.02139	10
tr|A0A318THQ7|A0A318THQ7_9BRAD	Carbamoyl-phosphate synthase small chain OS	Rhodopseudomonas faecalis OX	0.68805	1.02167	4
tr|A0A318T993|A0A318T993_9BRAD	Lactate dehydrogenase-like 2-hydroxyacid dehydrogenase OS	Rhodopseudomonas faecalis OX	0.84726	1.02186	4
tr|A0A318TJ13|A0A318TJ13_9BRAD	Pimeloyl-CoA dehydrogenase large subunit OS	Rhodopseudomonas faecalis OX	0.70953	1.02208	4
tr|A0A2T4JCK6|A0A2T4JCK6_RHOBL	Ribulose bisphosphate carboxylase large chain OS	Rhodobacter blasticus DSM 2131 OX	0.91152	1.02236	1
tr|A0A318TB62|A0A318TB62_9BRAD	DNA-binding transcriptional regulator NtrC OS	Rhodopseudomonas faecalis OX	0.86987	1.02241	8
tr|A0A318TLQ0|A0A318TLQ0_9BRAD	Light-independent protochlorophyllide reductase subunit N OS	Rhodopseudomonas faecalis OX	0.75667	1.02251	10
tr|A0A318TDD0|A0A318TDD0_9BRAD	NAD(P) transhydrogenase alpha subunit OS	Rhodopseudomonas faecalis OX	0.70924	1.02265	10
tr|A0A318TCR5|A0A318TCR5_9BRAD	2-octaprenylphenol hydroxylase OS	Rhodopseudomonas faecalis OX	0.8528	1.02267	2
tr|A0A318TTN4|A0A318TTN4_9BRAD	Peptidyl-dipeptidase Dcp OS	Rhodopseudomonas faecalis OX	0.83983	1.02353	8
tr|A0A318TJN8|A0A318TJN8_9BRAD	Cysteine--tRNA ligase OS	Rhodopseudomonas faecalis OX	0.75687	1.0238	6
tr|A0A2T4JA66|A0A2T4JA66_RHOBL	Branched-chain amino acid ABC transporter substrate-binding protein OS	Rhodobacter blasticus DSM 2131 OX	0.94884	1.02397	1
tr|Q07N13|Q07N13_RHOP5	Pyridoxal-5'-phosphate-dependent enzyme, beta subunit OS	Rhodopseudomonas palustris (strain BisA53) OX	0.89965	1.02439	1
tr|R8WKU1|R8WKU1_9ENTR	ATP synthase subunit beta OS	Citrobacter sp. KTE151 OX	0.89309	1.02454	3
tr|A0A2T4JBW9|A0A2T4JBW9_RHOBL	D-3-phosphoglycerate dehydrogenase OS	Rhodobacter blasticus DSM 2131 OX	0.88164	1.02454	1
tr|A0A318TEM4|A0A318TEM4_9BRAD	Blue-light-activated histidine kinase OS	Rhodopseudomonas faecalis OX	0.85667	1.02458	2
tr|A0A318TIX6|A0A318TIX6_9BRAD	Uncharacterized protein OS	Rhodopseudomonas faecalis OX	0.72181	1.02478	2
tr|A0A318TEG1|A0A318TEG1_9BRAD	Secondary thiamine-phosphate synthase enzyme OS	Rhodopseudomonas faecalis OX	0.75181	1.02547	2
tr|A0A318THH3|A0A318THH3_9BRAD	Protein-export membrane protein SecF OS	Rhodopseudomonas faecalis OX	0.72176	1.02587	2
tr|D5AM12|D5AM12_RHOCB	30S ribosomal protein S5 OS	Rhodobacter capsulatus (strain ATCC BAA-309 / NBRC 16581 / SB1003) OX	0.94112	1.02591	3
tr|A0A318T9C6|A0A318T9C6_9BRAD	Transcription termination/antitermination protein NusG OS	Rhodopseudomonas faecalis OX	0.69027	1.02593	9
tr|A0A318TM29|A0A318TM29_9BRAD	Glycolate oxidase FAD binding subunit OS	Rhodopseudomonas faecalis OX	0.85575	1.02608	4
tr|A0A285TB67|A0A285TB67_9RHOB	50S ribosomal protein L33 OS	Rhodobacter maris OX	0.93978	1.02617	1
tr|A0A318TIF7|A0A318TIF7_9BRAD	Uncharacterized protein OS	Rhodopseudomonas faecalis OX	0.8852	1.0262	1
tr|A0A318TBY0|A0A318TBY0_9BRAD	Pimeloyl-ACP methyl ester carboxylesterase OS	Rhodopseudomonas faecalis OX	0.62558	1.02624	3
tr|A0A318TL63|A0A318TL63_9BRAD	Uncharacterized protein OS	Rhodopseudomonas faecalis OX	0.90185	1.02633	1
tr|A0A318TUN5|A0A318TUN5_9BRAD	Uncharacterized protein OS	Rhodopseudomonas faecalis OX	0.91417	1.0266	1
tr|A0A4U1JLD4|A0A4U1JLD4_RHOCA	Cytochrome c-type protein OS	Rhodobacter capsulatus OX	0.94608	1.02672	1
tr|A0A318TK49|A0A318TK49_9BRAD	Tryptophanase OS	Rhodopseudomonas faecalis OX	0.59727	1.02677	10
tr|A0A318TVR0|A0A318TVR0_9BRAD	NADPH:quinone reductase-like Zn-dependent oxidoreductase OS	Rhodopseudomonas faecalis OX	0.72635	1.02684	5
tr|A0A318TFS0|A0A318TFS0_9BRAD	ETC complex I subunit-like protein OS	Rhodopseudomonas faecalis OX	0.75749	1.027	4
tr|A0A318TEL6|A0A318TEL6_9BRAD	Nucleoside diphosphate kinase OS	Rhodopseudomonas faecalis OX	0.56836	1.02748	5
tr|A0A318TVC6|A0A318TVC6_9BRAD	Ribulose bisphosphate carboxylase OS	Rhodopseudomonas faecalis OX	0.78374	1.02775	10
tr|A0A318TKW4|A0A318TKW4_9BRAD	Uncharacterized protein OS	Rhodopseudomonas faecalis OX	0.70107	1.0279	10
tr|A0A318TSN4|A0A318TSN4_9BRAD	Single cache domain-containing protein OS	Rhodopseudomonas faecalis OX	0.8613	1.02796	9
tr|A0A318TI88|A0A318TI88_9BRAD	Putative cold-shock DNA-binding protein OS	Rhodopseudomonas faecalis OX	0.78894	1.02889	5
tr|A0A318TGX7|A0A318TGX7_9BRAD	Uncharacterized protein OS	Rhodopseudomonas faecalis OX	0.80129	1.02896	6
tr|A0A318TKM4|A0A318TKM4_9BRAD	2-oxoglutarate ferredoxin oxidoreductase beta subunit OS	Rhodopseudomonas faecalis OX	0.84584	1.02933	2
tr|A0A6G8URR0|A0A6G8URR0_9ENTR	Fumarate reductase flavoprotein subunit OS	Citrobacter sp. Y3 OX	0.89122	1.02934	2
tr|A0A318TAP4|A0A318TAP4_9BRAD	APH domain-containing protein OS	Rhodopseudomonas faecalis OX	0.88176	1.02943	1
tr|A0A318TGU4|A0A318TGU4_9BRAD	ABC-type uncharacterized transport system substrate-binding protein OS	Rhodopseudomonas faecalis OX	0.85753	1.02999	1
tr|D5AP37|D5AP37_RHOCB	Leucine-responsive regulatory protein OS	Rhodobacter capsulatus (strain ATCC BAA-309 / NBRC 16581 / SB1003) OX	0.87385	1.03	1
tr|A0A318TGK4|A0A318TGK4_9BRAD	Cell division coordinator CpoB OS	Rhodopseudomonas faecalis OX	0.62457	1.03017	7
tr|Q135U1|Q135U1_RHOPS	zf-like domain-containing protein OS	Rhodopseudomonas palustris (strain BisB5) OX	0.89966	1.03052	1
tr|A0A318TUS8|A0A318TUS8_9BRAD	Inosine-5'-monophosphate dehydrogenase OS	Rhodopseudomonas faecalis OX	0.86698	1.03074	9
tr|A0A318TKS6|A0A318TKS6_9BRAD	Uncharacterized protein OS	Rhodopseudomonas faecalis OX	0.7926	1.03074	1
sp|Q07ND9|ENO_RHOP5	Enolase OS	Rhodopseudomonas palustris (strain BisA53) OX	0.78722	1.03136	2
tr|F8WZF0|F8WZF0_9BACT	Pyruvate:ferredoxin oxidoreductase OS	Dysgonomonas mossii DSM 22836 OX	0.89185	1.0316	2
tr|A0A318TC32|A0A318TC32_9BRAD	dITP/XTP pyrophosphatase OS	Rhodopseudomonas faecalis OX	0.81597	1.03175	2
tr|A0A318TL35|A0A318TL35_9BRAD	Sec-independent protein translocase protein TatA OS	Rhodopseudomonas faecalis OX	0.779	1.03191	1
tr|D5AL83|D5AL83_RHOCB	dTDP-4-dehydrorhamnose reductase OS	Rhodobacter capsulatus (strain ATCC BAA-309 / NBRC 16581 / SB1003) OX	0.87107	1.03237	1
tr|A0A318TJK6|A0A318TJK6_9BRAD	Glutathione S-transferase OS	Rhodopseudomonas faecalis OX	0.83965	1.0324	1
tr|A0A318TDA9|A0A318TDA9_9BRAD	UDP-glucuronate decarboxylase OS	Rhodopseudomonas faecalis OX	0.66559	1.03242	1
tr|A0A318TUR8|A0A318TUR8_9BRAD	Exopolyphosphatase OS	Rhodopseudomonas faecalis OX	0.75352	1.03254	6
tr|D5AMB4|D5AMB4_RHOCB	Cold shock protein CspA-2 OS	Rhodobacter capsulatus (strain ATCC BAA-309 / NBRC 16581 / SB1003) OX	0.96592	1.03265	2
tr|A0A318TIG6|A0A318TIG6_9BRAD	Nitrogenase-stabilizing/protective protein NifW OS	Rhodopseudomonas faecalis OX	0.91212	1.03277	3
tr|A0A318TA75|A0A318TA75_9BRAD	Ubiquinone biosynthesis O-methyltransferase OS	Rhodopseudomonas faecalis OX	0.59506	1.0328	7
tr|A0A318TK44|A0A318TK44_9BRAD	(R)-citramalate synthase OS	Rhodopseudomonas faecalis OX	0.58193	1.0328	10
tr|A0A318TE16|A0A318TE16_9BRAD	Bifunctional adenosylcobalamin biosynthesis protein OS	Rhodopseudomonas faecalis OX	0.85986	1.03289	2
tr|A0A318T896|A0A318T896_9BRAD	UDP-N-acetylglucosamine--N-acetylmuramyl-(pentapeptide) pyrophosphoryl-undecaprenol N-acetylglucosamine transferase OS	Rhodopseudomonas faecalis OX	0.574	1.03297	5
tr|A0A318TXU7|A0A318TXU7_9BRAD	Hpr(Ser) kinase/phosphatase OS	Rhodopseudomonas faecalis OX	0.51495	1.03305	4
tr|A0A318TLZ9|A0A318TLZ9_9BRAD	Indole-3-glycerol phosphate synthase OS	Rhodopseudomonas faecalis OX	0.36599	1.03333	6
tr|A0A6N2WQ05|A0A6N2WQ05_CITAM	Ethanolamine ammonia-lyase heavy chain OS	Citrobacter amalonaticus OX	0.90513	1.03335	4
tr|A0A318U0S2|A0A318U0S2_9BRAD	Acetyltransferase component of pyruvate dehydrogenase complex OS	Rhodopseudomonas faecalis OX	0.84895	1.03376	4
tr|A0A318THG6|A0A318THG6_9BRAD	DNA topoisomerase 1 OS	Rhodopseudomonas faecalis OX	0.69151	1.03386	6
tr|A0A318TJG3|A0A318TJG3_9BRAD	Glutathione-dependent peroxiredoxin OS	Rhodopseudomonas faecalis OX	0.68654	1.03402	8
tr|A0A318T8X6|A0A318T8X6_9BRAD	Phosphoenolpyruvate--protein phosphotransferase OS	Rhodopseudomonas faecalis OX	0.47429	1.03406	8
tr|A0A318TEK6|A0A318TEK6_9BRAD	30S ribosomal protein S5 OS	Rhodopseudomonas faecalis OX	0.52987	1.03409	6
tr|A0A318TNG9|A0A318TNG9_9BRAD	Lon protease OS	Rhodopseudomonas faecalis OX	0.69937	1.03452	10
tr|A0A318TI78|A0A318TI78_9BRAD	Histidine--tRNA ligase OS	Rhodopseudomonas faecalis OX	0.80963	1.035	7
tr|A0A318T795|A0A318T795_9BRAD	Uncharacterized protein DUF642 OS	Rhodopseudomonas faecalis OX	0.84154	1.03525	3
tr|A0A318TK80|A0A318TK80_9BRAD	Uncharacterized protein OS	Rhodopseudomonas faecalis OX	0.76163	1.03528	4
tr|A0A318TLN8|A0A318TLN8_9BRAD	Amino acid ABC transporter substrate-binding protein (PAAT family) OS	Rhodopseudomonas faecalis OX	0.46837	1.03551	10
tr|A0A318T9L0|A0A318T9L0_9BRAD	Xaa-Pro aminopeptidase OS	Rhodopseudomonas faecalis OX	0.67462	1.03574	1
tr|A0A318TAG2|A0A318TAG2_9BRAD	Phenylalanine--tRNA ligase beta subunit OS	Rhodopseudomonas faecalis OX	0.59756	1.03628	10
tr|Q2J1K1|Q2J1K1_RHOP2	Transketolase OS	Rhodopseudomonas palustris (strain HaA2) OX	0.57409	1.03672	1
tr|A0A0Q0QL12|A0A0Q0QL12_RHOCA	Uncharacterized conserved protein YjbJ, UPF0337 family OS	Rhodobacter capsulatus OX	0.86778	1.03694	3
tr|A0A318TER9|A0A318TER9_9BRAD	23S rRNA (Guanosine2251-2'-O)-methyltransferase OS	Rhodopseudomonas faecalis OX	0.8318	1.03702	3
tr|A0A318TLN4|A0A318TLN4_9BRAD	30S ribosomal protein S4 OS	Rhodopseudomonas faecalis OX	0.59284	1.03725	7
tr|A0A318T8F1|A0A318T8F1_9BRAD	Phosphoribosylaminoimidazole-succinocarboxamide synthase OS	Rhodopseudomonas faecalis OX	0.45649	1.03726	5
tr|A0A318T8D1|A0A318T8D1_9BRAD	Uncharacterized protein OS	Rhodopseudomonas faecalis OX	0.878	1.03735	2
tr|A0A318TRD0|A0A318TRD0_9BRAD	10 kDa chaperonin OS	Rhodopseudomonas faecalis OX	0.74414	1.03788	5
tr|A0A318TAM1|A0A318TAM1_9BRAD	S-methyl-5'-thioadenosine phosphorylase OS	Rhodopseudomonas faecalis OX	0.66278	1.03811	10
tr|A0A318TPS2|A0A318TPS2_9BRAD	30S ribosomal protein S3 OS	Rhodopseudomonas faecalis OX	0.53459	1.03824	9
tr|A0A318T8N0|A0A318T8N0_9BRAD	Enoyl-CoA hydratase OS	Rhodopseudomonas faecalis OX	0.58004	1.03887	8
tr|A0A318TQG9|A0A318TQG9_9BRAD	Uncharacterized protein OS	Rhodopseudomonas faecalis OX	0.64488	1.03953	6
tr|A0A318TAL4|A0A318TAL4_9BRAD	LemA protein OS	Rhodopseudomonas faecalis OX	0.55796	1.03981	2
tr|A0A318TEX1|A0A318TEX1_9BRAD	Lactoylglutathione lyase OS	Rhodopseudomonas faecalis OX	0.70944	1.03997	2
tr|A0A2T4JAZ5|A0A2T4JAZ5_RHOBL	30S ribosomal protein S9 OS	Rhodobacter blasticus DSM 2131 OX	0.89196	1.04046	2
tr|A0A318TKG5|A0A318TKG5_9BRAD	Uncharacterized protein OS	Rhodopseudomonas faecalis OX	0.28342	1.04099	2
tr|D5AM06|D5AM06_RHOCB	50S ribosomal protein L24 OS	Rhodobacter capsulatus (strain ATCC BAA-309 / NBRC 16581 / SB1003) OX	0.88175	1.04112	3
tr|A0A318TGV4|A0A318TGV4_9BRAD	Electron transfer flavoprotein-ubiquinone oxidoreductase OS	Rhodopseudomonas faecalis OX	0.5399	1.04139	10
tr|Q07QY2|Q07QY2_RHOP5	Enoyl-CoA hydratase OS	Rhodopseudomonas palustris (strain BisA53) OX	0.82429	1.04149	1
tr|A0A318TIC1|A0A318TIC1_9BRAD	[LSU ribosomal protein L3P]-glutamine N5-methyltransferase OS	Rhodopseudomonas faecalis OX	0.5229	1.04177	3
tr|A0A318TNL4|A0A318TNL4_9BRAD	LexA repressor OS	Rhodopseudomonas faecalis OX	0.49558	1.04223	2
tr|A0A2T4J697|A0A2T4J697_RHOBL	ATP synthase subunit beta OS	Rhodobacter blasticus DSM 2131 OX	0.7216	1.04225	1
tr|D5ALR9|D5ALR9_RHOCB	Protein HflC OS	Rhodobacter capsulatus (strain ATCC BAA-309 / NBRC 16581 / SB1003) OX	0.83323	1.0423	2
tr|A0A318TGT1|A0A318TGT1_9BRAD	DUF815 domain-containing protein OS	Rhodopseudomonas faecalis OX	0.6374	1.04233	4
tr|A0A318THN9|A0A318THN9_9BRAD	Phosphatidylethanolamine N-methyltransferase /phosphatidyl-N-methylethanolamine N-methyltransferase OS	Rhodopseudomonas faecalis OX	0.49278	1.04262	4
tr|A0A318TUH3|A0A318TUH3_9BRAD	Serine--tRNA ligase OS	Rhodopseudomonas faecalis OX	0.62282	1.04263	8
tr|A0A0N8VFH9|A0A0N8VFH9_RHOCA	Reaction center protein M chain OS	Rhodobacter capsulatus OX	0.86297	1.04264	2
tr|A0A318TL73|A0A318TL73_9BRAD	Diguanylate cyclase/phosphodiesterase with PAS/PAC sensor(S) OS	Rhodopseudomonas faecalis OX	0.78759	1.04283	1
tr|A0A318TLV8|A0A318TLV8_9BRAD	Putative N-acetyltransferase YhbS OS	Rhodopseudomonas faecalis OX	0.46072	1.04329	1
tr|A0A318TA40|A0A318TA40_9BRAD	GTPase HflX OS	Rhodopseudomonas faecalis OX	0.74082	1.04335	2
tr|A0A318TKU2|A0A318TKU2_9BRAD	ATP phosphoribosyltransferase regulatory subunit OS	Rhodopseudomonas faecalis OX	0.61025	1.04363	3
tr|Q07RI7|Q07RI7_RHOP5	UspA domain protein OS	Rhodopseudomonas palustris (strain BisA53) OX	0.7758	1.04379	2
tr|A0A318TC15|A0A318TC15_9BRAD	Diaminopimelate epimerase OS	Rhodopseudomonas faecalis OX	0.77483	1.04388	2
tr|A0A318TKS9|A0A318TKS9_9BRAD	Bifunctional NAD(P)H-hydrate repair enzyme OS	Rhodopseudomonas faecalis OX	0.77027	1.04457	5
tr|A0A318TM49|A0A318TM49_9BRAD	Propionyl-CoA synthetase OS	Rhodopseudomonas faecalis OX	0.67067	1.04459	10
tr|A0A318TGK0|A0A318TGK0_9BRAD	Phosphate acyltransferase OS	Rhodopseudomonas faecalis OX	0.60418	1.04459	9
tr|A0A318U028|A0A318U028_9RHOB	Putative spermidine/putrescine transport system substrate-binding protein OS	Rhodobacter viridis OX	0.67111	1.04471	1
tr|A0A318TC94|A0A318TC94_9BRAD	Carbonic anhydrase OS	Rhodopseudomonas faecalis OX	0.52507	1.04481	4
tr|A0A318THE9|A0A318THE9_9BRAD	Shikimate kinase OS	Rhodopseudomonas faecalis OX	0.68921	1.04505	1
tr|A0A318TET5|A0A318TET5_9BRAD	SUMT OS	Rhodopseudomonas faecalis OX	0.85042	1.04557	1
tr|A0A318TPV2|A0A318TPV2_9BRAD	Elongation factor Tu OS	Rhodopseudomonas faecalis OX	0.43505	1.04588	5
tr|A0A318TN11|A0A318TN11_9BRAD	Poly(A) polymerase/tRNA nucleotidyltransferase (CCA-adding enzyme) OS	Rhodopseudomonas faecalis OX	0.84113	1.04639	3
tr|A0A318TGZ0|A0A318TGZ0_9BRAD	Allophanate hydrolase OS	Rhodopseudomonas faecalis OX	0.7263	1.04645	1
tr|A0A318T8E0|A0A318T8E0_9BRAD	Adenosylhomocysteinase OS	Rhodopseudomonas faecalis OX	0.49442	1.04648	10
tr|A0A318TZ87|A0A318TZ87_9BRAD	Lysozyme family protein OS	Rhodopseudomonas faecalis OX	0.89356	1.04677	2
tr|A0A318TIK1|A0A318TIK1_9BRAD	Carbonic anhydrase OS	Rhodopseudomonas faecalis OX	0.70148	1.04677	5
tr|A0A318TFF2|A0A318TFF2_9BRAD	N5-carboxyaminoimidazole ribonucleotide synthase OS	Rhodopseudomonas faecalis OX	0.80764	1.0468	8
tr|A0A318TGW6|A0A318TGW6_9BRAD	Anthranilate synthase OS	Rhodopseudomonas faecalis OX	0.704	1.04728	10
tr|A0A318TD35|A0A318TD35_9BRAD	Arsenate reductase OS	Rhodopseudomonas faecalis OX	0.84026	1.04752	1
tr|A0A318TI01|A0A318TI01_9BRAD	N-acetyl-gamma-glutamyl-phosphate reductase OS	Rhodopseudomonas faecalis OX	0.63359	1.04775	3
tr|A0A318TVW1|A0A318TVW1_9BRAD	DNA-binding transcriptional MerR regulator OS	Rhodopseudomonas faecalis OX	0.55417	1.04786	2
tr|A0A318TDF8|A0A318TDF8_9BRAD	Valine--tRNA ligase OS	Rhodopseudomonas faecalis OX	0.51059	1.04787	9
tr|A0A318TJ46|A0A318TJ46_9BRAD	Methylmalonyl-CoA mutase metallochaperone MeaB OS	Rhodopseudomonas faecalis OX	0.6293	1.04842	4
tr|D5AUC8|D5AUC8_RHOCB	Elongation factor Ts OS	Rhodobacter capsulatus (strain ATCC BAA-309 / NBRC 16581 / SB1003) OX	0.87838	1.04874	7
tr|A0A318TN67|A0A318TN67_9BRAD	Phytoene dehydrogenase-like protein OS	Rhodopseudomonas faecalis OX	0.58492	1.04896	1
tr|A0A318TR73|A0A318TR73_9BRAD	5'-nucleotidase SurE OS	Rhodopseudomonas faecalis OX	0.51044	1.04904	7
tr|A0A318TGK8|A0A318TGK8_9BRAD	Signal peptidase I OS	Rhodopseudomonas faecalis OX	0.61434	1.04943	1
tr|A0A318TCC2|A0A318TCC2_9BRAD	tRNA (guanine-N(7)-)-methyltransferase OS	Rhodopseudomonas faecalis OX	0.84047	1.04967	2
tr|A0A318TJI4|A0A318TJI4_9BRAD	LuxR family two component transcriptional regulator OS	Rhodopseudomonas faecalis OX	0.54408	1.0497	2
tr|A0A2T4J4E7|A0A2T4J4E7_RHOBL	50S ribosomal protein L11 OS	Rhodobacter blasticus DSM 2131 OX	0.86596	1.04994	1
tr|A0A318TBV3|A0A318TBV3_9BRAD	Divinyl protochlorophyllide a 8-vinyl-reductase OS	Rhodopseudomonas faecalis OX	0.66615	1.04998	3
tr|A0A318TI54|A0A318TI54_9BRAD	Mg-protoporphyrin IX chelatase OS	Rhodopseudomonas faecalis OX	0.44445	1.05006	10
tr|A0A318T985|A0A318T985_9BRAD	DNA-directed RNA polymerase subunit alpha OS	Rhodopseudomonas faecalis OX	0.46033	1.05078	10
tr|Q07HA2|Q07HA2_RHOP5	4-hydroxybenzoyl-CoA thioesterase OS	Rhodopseudomonas palustris (strain BisA53) OX	0.79299	1.05089	2
tr|A0A318TJN0|A0A318TJN0_9BRAD	Phosphoglycolate phosphatase OS	Rhodopseudomonas faecalis OX	0.63472	1.05107	5
tr|A0A318TUA2|A0A318TUA2_9BRAD	NADH-quinone oxidoreductase subunit D OS	Rhodopseudomonas faecalis OX	0.76799	1.05121	5
tr|A0A6G8UI16|A0A6G8UI16_9ENTR	Fructose-bisphosphate aldolase OS	Citrobacter sp. Y3 OX	0.82319	1.0516	4
tr|A0A318TBQ2|A0A318TBQ2_9BRAD	Mechanosensitive ion channel-like protein OS	Rhodopseudomonas faecalis OX	0.84125	1.05182	1
tr|A0A318TBD6|A0A318TBD6_9BRAD	Endonuclease YncB(Thermonuclease family) OS	Rhodopseudomonas faecalis OX	0.61437	1.05192	1
tr|A0A318TFG3|A0A318TFG3_9BRAD	Acyl carrier protein OS	Rhodopseudomonas faecalis OX	0.55089	1.05298	5
tr|A0A318TFT6|A0A318TFT6_9BRAD	GTP pyrophosphokinase rsh OS	Rhodopseudomonas faecalis OX	0.52113	1.05312	9
tr|A0A6N9KEE3|A0A6N9KEE3_CITAM	Glycerol kinase GlpK OS	Citrobacter amalonaticus OX	0.7047	1.05319	7
tr|A0A318TUD5|A0A318TUD5_9BRAD	Glutamine--tRNA ligase OS	Rhodopseudomonas faecalis OX	0.35806	1.05329	10
tr|A0A318TL25|A0A318TL25_9BRAD	Sulfide dehydrogenase (Flavoprotein) subunit SudA /sulfide dehydrogenase (Flavoprotein) subunit SudB OS	Rhodopseudomonas faecalis OX	0.43802	1.05335	10
tr|A0A318TFD1|A0A318TFD1_9BRAD	Iron complex transport system ATP-binding protein OS	Rhodopseudomonas faecalis OX	0.78184	1.05339	1
tr|A0A318TDC4|A0A318TDC4_9BRAD	DNA gyrase subunit A OS	Rhodopseudomonas faecalis OX	0.59332	1.05376	8
tr|A0A318TVA9|A0A318TVA9_9BRAD	zf-like domain-containing protein OS	Rhodopseudomonas faecalis OX	0.72719	1.0538	2
tr|A0A318TH52|A0A318TH52_9BRAD	Precorrin-3 methyltransferase OS	Rhodopseudomonas faecalis OX	0.67028	1.05394	2
tr|A0A318T7P5|A0A318T7P5_9BRAD	Argininosuccinate lyase OS	Rhodopseudomonas faecalis OX	0.33644	1.05423	8
tr|A0A318TE82|A0A318TE82_9BRAD	Dihydrolipoyllysine-residue succinyltransferase component of 2-oxoglutarate dehydrogenase complex OS	Rhodopseudomonas faecalis OX	0.433	1.05429	9
tr|A0A1G7J630|A0A1G7J630_RHOCA	Inosine-5'-monophosphate dehydrogenase OS	Rhodobacter capsulatus OX	0.7248	1.0543	2
tr|A0A318TLH1|A0A318TLH1_9BRAD	DNA repair exonuclease SbcCD nuclease subunit OS	Rhodopseudomonas faecalis OX	0.60067	1.05441	1
tr|D5ARX0|D5ARX0_RHOCB	Nitrogenase-stabilizing/protective protein NifW OS	Rhodobacter capsulatus (strain ATCC BAA-309 / NBRC 16581 / SB1003) OX	0.8622	1.05461	1
tr|A0A1G7E3U5|A0A1G7E3U5_RHOCA	Uncharacterized protein OS	Rhodobacter capsulatus OX	0.78111	1.05464	2
tr|A0A318TDC0|A0A318TDC0_9BRAD	Uncharacterized protein OS	Rhodopseudomonas faecalis OX	0.66869	1.0548	1
tr|A0A318TXU0|A0A318TXU0_9BRAD	Fatty-acyl-CoA synthase OS	Rhodopseudomonas faecalis OX	0.80577	1.05566	2
tr|D2TMA3|D2TMA3_CITRI	60 kDa chaperonin OS	Citrobacter rodentium (strain ICC168) OX	0.74239	1.05569	1
tr|A0A318TDS1|A0A318TDS1_9BRAD	Sugar/nucleoside kinase (Ribokinase family) OS	Rhodopseudomonas faecalis OX	0.59631	1.05578	1
tr|A0A4U1K2R6|A0A4U1K2R6_RHOCA	Aspartate-semialdehyde dehydrogenase OS	Rhodobacter capsulatus OX	0.82996	1.05584	1
tr|A0A318T839|A0A318T839_9BRAD	Phosphoribosylaminoimidazole-succinocarboxamide synthase OS	Rhodopseudomonas faecalis OX	0.49383	1.05587	8
tr|A0A318TJA3|A0A318TJA3_9BRAD	Quinol monooxygenase YgiN OS	Rhodopseudomonas faecalis OX	0.68244	1.05594	5
tr|A0A318T806|A0A318T806_9BRAD	ATP synthase subunit delta OS	Rhodopseudomonas faecalis OX	0.38213	1.05617	10
tr|A0A318TH34|A0A318TH34_9BRAD	Nitrogen fixation protein NifX OS	Rhodopseudomonas faecalis OX	0.8885	1.05619	6
tr|A0A318TBQ1|A0A318TBQ1_9BRAD	Ferredoxin OS	Rhodopseudomonas faecalis OX	0.53693	1.05626	2
tr|A0A318TJ77|A0A318TJ77_9BRAD	SoxAX cytochrome complex subunit A OS	Rhodopseudomonas faecalis OX	0.65484	1.05631	1
tr|A0A318TPT2|A0A318TPT2_9BRAD	Elongation factor G OS	Rhodopseudomonas faecalis OX	0.32882	1.05647	10
tr|A0A318TDU4|A0A318TDU4_9BRAD	Thiamine-phosphate pyrophosphorylase OS	Rhodopseudomonas faecalis OX	0.66213	1.05647	1
tr|A0A318TW21|A0A318TW21_9BRAD	Phosphoribosyl 1,2-cyclic phosphate phosphodiesterase OS	Rhodopseudomonas faecalis OX	0.41207	1.05649	1
tr|A0A318T8U9|A0A318T8U9_9BRAD	UDP-glucuronate 4-epimerase OS	Rhodopseudomonas faecalis OX	0.54017	1.05675	2
tr|A0A6G8USR7|A0A6G8USR7_9ENTR	2-iminobutanoate/2-iminopropanoate deaminase OS	Citrobacter sp. Y3 OX	0.77152	1.05695	3
tr|A0A318TBU0|A0A318TBU0_9BRAD	Homoserine kinase OS	Rhodopseudomonas faecalis OX	0.56304	1.05728	1
tr|Q21A83|Q21A83_RHOPB	Enoyl-[acyl-carrier-protein] reductase [NADH] OS	Rhodopseudomonas palustris (strain BisB18) OX	0.82177	1.05744	1
tr|A0A318T8K0|A0A318T8K0_9BRAD	DNA gyrase subunit B OS	Rhodopseudomonas faecalis OX	0.49456	1.05751	6
tr|A0A318TML2|A0A318TML2_9BRAD	3-oxoacyl-[acyl-carrier-protein] synthase II OS	Rhodopseudomonas faecalis OX	0.35271	1.05762	8
tr|A0A318TA03|A0A318TA03_9BRAD	Uncharacterized protein DUF2147 OS	Rhodopseudomonas faecalis OX	0.58691	1.05805	10
tr|A0A318TFR3|A0A318TFR3_9BRAD	Acyl-CoA synthetase (AMP-forming)/AMP-acid ligase II OS	Rhodopseudomonas faecalis OX	0.67354	1.05824	1
tr|A0A318TCS5|A0A318TCS5_9BRAD	50S ribosomal protein L30 OS	Rhodopseudomonas faecalis OX	0.54295	1.05853	2
tr|D5AVI3|D5AVI3_RHOCB	TRAP transporter solute receptor, TAXI family OS	Rhodobacter capsulatus (strain ATCC BAA-309 / NBRC 16581 / SB1003) OX	0.84006	1.05873	7
tr|D2TTL4|D2TTL4_CITRI	50S ribosomal protein L31 OS	Citrobacter rodentium (strain ICC168) OX	0.93028	1.05929	2
tr|A0A318TGQ3|A0A318TGQ3_9BRAD	Uncharacterized protein OS	Rhodopseudomonas faecalis OX	0.50678	1.05929	1
tr|A0A318TSI0|A0A318TSI0_9BRAD	Pyruvate kinase OS	Rhodopseudomonas faecalis OX	0.37171	1.05931	10
tr|A0A318TRN9|A0A318TRN9_9BRAD	Peroxiredoxin OS	Rhodopseudomonas faecalis OX	0.72677	1.05934	2
tr|A0A2T4JBE7|A0A2T4JBE7_RHOBL	Invasion associated locus B family protein OS	Rhodobacter blasticus DSM 2131 OX	0.77738	1.05941	3
tr|A0A1G7DVY5|A0A1G7DVY5_RHOCA	Thiosulfate/3-mercaptopyruvate sulfurtransferase OS	Rhodobacter capsulatus OX	0.81382	1.05948	2
RRRRRtr|Q2J491|Q2J491_RHOP2	REVERSED Transcriptional regulator, AsnC family OS	Rhodopseudomonas palustris (strain HaA2) OX	0.84503	1.06008	1
tr|A0A318TQW5|A0A318TQW5_9BRAD	Uncharacterized protein OS	Rhodopseudomonas faecalis OX	0.43728	1.06053	6
tr|A0A318TRZ7|A0A318TRZ7_9BRAD	Methanogenic corrinoid protein MtbC1 OS	Rhodopseudomonas faecalis OX	0.68415	1.06094	1
tr|A0A318T9I1|A0A318T9I1_9BRAD	dTDP-4-amino-4,6-dideoxygalactose transaminase OS	Rhodopseudomonas faecalis OX	0.41166	1.06098	6
tr|A0A6G8UHP6|A0A6G8UHP6_9ENTR	Aconitate hydratase B OS	Citrobacter sp. Y3 OX	0.75047	1.06113	4
tr|A0A318TKX1|A0A318TKX1_9BRAD	Proline--tRNA ligase OS	Rhodopseudomonas faecalis OX	0.29137	1.06116	9
tr|A0A318T701|A0A318T701_9BRAD	Chorismate mutase OS	Rhodopseudomonas faecalis OX	0.52475	1.06135	3
tr|A0A318TIJ5|A0A318TIJ5_9BRAD	DNA-directed RNA polymerase subunit beta' OS	Rhodopseudomonas faecalis OX	0.37338	1.06152	10
tr|A0A1G7NVU2|A0A1G7NVU2_RHOCA	Uroporphyrinogen decarboxylase OS	Rhodobacter capsulatus OX	0.89111	1.06189	3
tr|A0A318TEE8|A0A318TEE8_9BRAD	Collagenase-like PrtC family protease OS	Rhodopseudomonas faecalis OX	0.60082	1.0623	6
tr|A0A318TAF9|A0A318TAF9_9BRAD	DNA-directed RNA polymerase subunit beta OS	Rhodopseudomonas faecalis OX	0.2845	1.06252	10
tr|A0A318T8H8|A0A318T8H8_9BRAD	Uncharacterized protein OS	Rhodopseudomonas faecalis OX	0.45289	1.06272	4
tr|A0A318T9R4|A0A318T9R4_9BRAD	CRISPR-associated Csd1 family protein OS	Rhodopseudomonas faecalis OX	0.87125	1.06282	7
tr|A0A318TN39|A0A318TN39_9BRAD	Chaperone required for assembly of F1-ATPase OS	Rhodopseudomonas faecalis OX	0.5988	1.06289	2
tr|A0A318TDN2|A0A318TDN2_9BRAD	Pyridoxine/pyridoxamine 5'-phosphate oxidase OS	Rhodopseudomonas faecalis OX	0.34326	1.06296	5
tr|A0A418V4A4|A0A418V4A4_RHOPL	Elongation factor Tu OS	Rhodopseudomonas palustris OX	0.51278	1.06298	3
tr|A0A318TNI3|A0A318TNI3_9BRAD	DNA-binding protein HU-beta OS	Rhodopseudomonas faecalis OX	0.22099	1.06302	7
tr|A0A318TF29|A0A318TF29_9BRAD	Transcription termination factor Rho OS	Rhodopseudomonas faecalis OX	0.46205	1.06338	9
tr|Q6NBD4|Q6NBD4_RHOPA	Putative transposase OS	Rhodopseudomonas palustris (strain ATCC BAA-98 / CGA009) OX	0.57564	1.06374	3
tr|A0A318TBD4|A0A318TBD4_9BRAD	Cytidylate kinase OS	Rhodopseudomonas faecalis OX	0.40933	1.06376	3
tr|A0A2T5KCB9|A0A2T5KCB9_9RHOB	60 kDa chaperonin OS	Rhodobacter azotoformans OX	0.87907	1.06402	1
tr|A0A318TA13|A0A318TA13_9BRAD	Hydroxyacylglutathione hydrolase OS	Rhodopseudomonas faecalis OX	0.46077	1.06406	4
tr|Q21CH0|Q21CH0_RHOPB	Bacterial translation initiation factor 3 (BIF-3) OS	Rhodopseudomonas palustris (strain BisB18) OX	0.62781	1.06414	1
tr|A0A318TKM7|A0A318TKM7_9BRAD	Nitrogen regulatory protein P-II OS	Rhodopseudomonas faecalis OX	0.61533	1.06446	6
tr|A0A318TBV9|A0A318TBV9_9BRAD	Gamma-glutamyl phosphate reductase OS	Rhodopseudomonas faecalis OX	0.37413	1.06456	5
tr|A0A318TM62|A0A318TM62_9BRAD	Cystathionine beta-lyase OS	Rhodopseudomonas faecalis OX	0.26025	1.06456	4
tr|A0A318TNZ7|A0A318TNZ7_9BRAD	L-isoaspartyl protein carboxyl methyltransferase OS	Rhodopseudomonas faecalis OX	0.2582	1.06463	1
tr|A0A318TC70|A0A318TC70_9BRAD	Chromosome partitioning protein OS	Rhodopseudomonas faecalis OX	0.92232	1.06474	6
tr|A0A318TC20|A0A318TC20_9BRAD	3-isopropylmalate dehydratase large subunit OS	Rhodopseudomonas faecalis OX	0.24809	1.06481	10
tr|A0A323UJE2|A0A323UJE2_RHOPL	Capsid protein OS	Rhodopseudomonas palustris OX	0.70023	1.06508	2
tr|A0A4U1JM31|A0A4U1JM31_RHOCA	OmpA family protein OS	Rhodobacter capsulatus OX	0.81875	1.06509	2
tr|A0A2T4JCZ0|A0A2T4JCZ0_RHOBL	30S ribosomal protein S1 OS	Rhodobacter blasticus DSM 2131 OX	0.81956	1.06512	1
tr|A0A318TN21|A0A318TN21_9BRAD	Ubiquinol-cytochrome c reductase iron-sulfur subunit OS	Rhodopseudomonas faecalis OX	0.57869	1.06517	3
tr|Q07UX7|Q07UX7_RHOP5	Succinate--CoA ligase [ADP-forming] subunit alpha OS	Rhodopseudomonas palustris (strain BisA53) OX	0.43252	1.06517	1
tr|A0A318TJP7|A0A318TJP7_9BRAD	3-oxoacyl-[acyl-carrier-protein] synthase II OS	Rhodopseudomonas faecalis OX	0.83087	1.0658	10
tr|A0A318THL9|A0A318THL9_9BRAD	Ketol-acid reductoisomerase (NADP(+)) OS	Rhodopseudomonas faecalis OX	0.65132	1.06585	9
tr|A0A318TFM6|A0A318TFM6_9BRAD	Aspartyl/glutamyl-tRNA(Asn/Gln) amidotransferase subunit B OS	Rhodopseudomonas faecalis OX	0.3766	1.06613	9
tr|A0A318T9F4|A0A318T9F4_9BRAD	Ribosomal protein L11 methyltransferase OS	Rhodopseudomonas faecalis OX	0.57189	1.06663	2
tr|D5AUK6|D5AUK6_RHOCB	Hemolysin-type calcium-binding repeat family protein OS	Rhodobacter capsulatus (strain ATCC BAA-309 / NBRC 16581 / SB1003) OX	0.80149	1.06693	1
tr|A0A4Y9INH8|A0A4Y9INH8_9BACT	Cysteine synthase OS	Dysgonomonas mossii OX	0.77635	1.067	4
tr|A0A318TCM0|A0A318TCM0_9BRAD	Formyl-CoA transferase OS	Rhodopseudomonas faecalis OX	0.71836	1.06715	3
tr|A0A2W5S2A8|A0A2W5S2A8_RHOSH	F0F1 ATP synthase subunit beta (Fragment) OS	Rhodobacter sphaeroides OX	0.92296	1.06749	1
tr|A0A318TGX4|A0A318TGX4_9BRAD	Protein translocase subunit SecD OS	Rhodopseudomonas faecalis OX	0.33803	1.06773	8
tr|R8X784|R8X784_9ENTR	60 kDa chaperonin OS	Citrobacter sp. KTE151 OX	0.72508	1.06783	3
tr|A0A318TJS6|A0A318TJS6_9BRAD	Aconitate hydratase OS	Rhodopseudomonas faecalis OX	0.24467	1.06799	10
tr|A0A318TEA2|A0A318TEA2_9BRAD	Glutaredoxin OS	Rhodopseudomonas faecalis OX	0.72359	1.06836	2
tr|A0A318TKZ4|A0A318TKZ4_9BRAD	GTP cyclohydrolase 1 OS	Rhodopseudomonas faecalis OX	0.53899	1.06861	4
tr|A0A318T7V9|A0A318T7V9_9BRAD	Flagellar protein FlbT OS	Rhodopseudomonas faecalis OX	0.39555	1.0688	1
tr|A0A4V6WR21|A0A4V6WR21_RHOCA	Nitrogenase iron-molybdenum cofactor biosynthesis protein NifE OS	Rhodobacter capsulatus OX	0.58857	1.06884	1
tr|A0A323U8Y8|A0A323U8Y8_RHOPL	Fumarate hydratase class I OS	Rhodopseudomonas palustris OX	0.57957	1.06897	1
tr|A0A318TDF7|A0A318TDF7_9BRAD	Ferrochelatase OS	Rhodopseudomonas faecalis OX	0.42514	1.06899	8
tr|A0A318TBM7|A0A318TBM7_9BRAD	Ribonuclease D OS	Rhodopseudomonas faecalis OX	0.33451	1.06904	3
tr|A0A318TQ41|A0A318TQ41_9BRAD	Dihydroxy-acid dehydratase OS	Rhodopseudomonas faecalis OX	0.18701	1.06914	8
tr|A0A318TJB0|A0A318TJB0_9BRAD	Rubrerythrin OS	Rhodopseudomonas faecalis OX	0.90338	1.0693	2
tr|B9KL89|B9KL89_RHOSK	Elongation factor Tu OS	Rhodobacter sphaeroides (strain KD131 / KCTC 12085) OX	0.36099	1.0694	3
tr|A0A318THC5|A0A318THC5_9BRAD	GCV_T domain-containing protein OS	Rhodopseudomonas faecalis OX	0.34691	1.06954	1
tr|A0A318U0M4|A0A318U0M4_9BRAD	30S ribosomal protein S2 OS	Rhodopseudomonas faecalis OX	0.24022	1.06957	10
tr|A0A318TGR7|A0A318TGR7_9BRAD	LuxR family two component transcriptional regulator OS	Rhodopseudomonas faecalis OX	0.33103	1.06985	9
tr|A0A318TL74|A0A318TL74_9BRAD	30S ribosomal protein S9 OS	Rhodopseudomonas faecalis OX	0.39799	1.06989	10
tr|A0A318TQ19|A0A318TQ19_9BRAD	KDO2-lipid IV(A) lauroyltransferase OS	Rhodopseudomonas faecalis OX	0.6139	1.07002	3
tr|F8WXH5|F8WXH5_9BACT	Enolase OS	Dysgonomonas mossii DSM 22836 OX	0.79043	1.07002	1
tr|A0A318TFG8|A0A318TFG8_9BRAD	Oligoendopeptidase F OS	Rhodopseudomonas faecalis OX	0.30561	1.07017	8
tr|A0A318TIW3|A0A318TIW3_9BRAD	3-oxoacyl-[acyl-carrier-protein] synthase 3 OS	Rhodopseudomonas faecalis OX	0.39436	1.07017	3
tr|A0A318TGN0|A0A318TGN0_9BRAD	Nucleoid-associated protein BJ122_109140 OS	Rhodopseudomonas faecalis OX	0.48269	1.07023	6
tr|A0A318T8C0|A0A318T8C0_9BRAD	Short-subunit dehydrogenase OS	Rhodopseudomonas faecalis OX	0.56575	1.07033	2
tr|A0A318TCH0|A0A318TCH0_9BRAD	CN hydrolase domain-containing protein OS	Rhodopseudomonas faecalis OX	0.53054	1.07048	5
tr|A0A318TRY8|A0A318TRY8_9BRAD	Ribulose-bisphosphate carboxylase large chain OS	Rhodopseudomonas faecalis OX	0.43659	1.07057	10
tr|A0A318T7Y1|A0A318T7Y1_9BRAD	Phosphomannomutase/phosphoglucomutase OS	Rhodopseudomonas faecalis OX	0.5867	1.07081	1
tr|A0A318THF0|A0A318THF0_9BRAD	Hemerythrin-like domain-containing protein OS	Rhodopseudomonas faecalis OX	0.37568	1.07089	6
tr|F8WW86|F8WW86_9BACT	Uncharacterized protein OS	Dysgonomonas mossii DSM 22836 OX	0.81847	1.07098	2
tr|A0A318TE80|A0A318TE80_9BRAD	Chaperone protein DnaJ OS	Rhodopseudomonas faecalis OX	0.51897	1.07106	9
tr|A0A318TLW9|A0A318TLW9_9BRAD	Glutaryl-CoA dehydrogenase OS	Rhodopseudomonas faecalis OX	0.3881	1.07114	3
tr|A0A318TTI3|A0A318TTI3_9BRAD	[SSU ribosomal protein S5P]-alanine acetyltransferase OS	Rhodopseudomonas faecalis OX	0.49579	1.0719	1
tr|A0A318U076|A0A318U076_9BRAD	10 kDa chaperonin OS	Rhodopseudomonas faecalis OX	0.6828	1.07191	7
tr|Q6N7N6|Q6N7N6_RHOPA	HEPN_Swt1 domain-containing protein OS	Rhodopseudomonas palustris (strain ATCC BAA-98 / CGA009) OX	0.73004	1.07221	1
tr|A0A318TD44|A0A318TD44_9BRAD	Photosynthetic reaction center H subunit OS	Rhodopseudomonas faecalis OX	0.43345	1.07222	9
tr|A0A318THS6|A0A318THS6_9BRAD	Glutamyl-tRNA(Gln) amidotransferase subunit A OS	Rhodopseudomonas faecalis OX	0.25737	1.07229	9
tr|A0A318TDH4|A0A318TDH4_9BRAD	Acetoin utilization deacetylase AcuC-like enzyme OS	Rhodopseudomonas faecalis OX	0.41016	1.07243	7
tr|A0A6M1U4J1|A0A6M1U4J1_9RHOB	Uncharacterized protein OS	Rhodobacter sp. HX-7-19 OX	0.59982	1.07244	1
tr|A0A212IZ40|A0A212IZ40_9BACT	Putative outer membrane protein OS	uncultured Dysgonomonas sp. OX	0.697	1.07253	5
tr|A0A318TI32|A0A318TI32_9BRAD	Ribosome-binding factor A OS	Rhodopseudomonas faecalis OX	0.29225	1.07258	1
tr|A0A318THK8|A0A318THK8_9BRAD	Uncharacterized protein (TIGR00255 family) OS	Rhodopseudomonas faecalis OX	0.33425	1.07282	10
tr|A0A318TP75|A0A318TP75_9BRAD	GTPase Obg OS	Rhodopseudomonas faecalis OX	0.42321	1.07343	7
tr|Q6N795|Q6N795_RHOPA	Possible nitrogenase molybdenum-iron protein alpha chain (Nitrogenase component I) (Dinitrogenase) OS	Rhodopseudomonas palustris (strain ATCC BAA-98 / CGA009) OX	0.80133	1.07388	5
tr|A0A1G7LAS7|A0A1G7LAS7_RHOCA	Outer membrane protein OmpU OS	Rhodobacter capsulatus OX	0.83144	1.07399	4
tr|A0A318TPD5|A0A318TPD5_9BRAD	Glutamine--fructose-6-phosphate aminotransferase [isomerizing] OS	Rhodopseudomonas faecalis OX	0.25433	1.07411	6
tr|A0A0Q0QSP1|A0A0Q0QSP1_RHOCA	Phosphate butyryltransferase OS	Rhodobacter capsulatus OX	0.76055	1.07452	3
tr|A0A318TDU2|A0A318TDU2_9BRAD	NADH-quinone oxidoreductase subunit B OS	Rhodopseudomonas faecalis OX	0.70194	1.07454	1
tr|A0A318TIU6|A0A318TIU6_9BRAD	Uncharacterized protein OS	Rhodopseudomonas faecalis OX	0.05335	1.07478	10
tr|Q07HS3|Q07HS3_RHOP5	Enoyl-[acyl-carrier-protein] reductase [NADH] OS	Rhodopseudomonas palustris (strain BisA53) OX	0.26135	1.07484	2
tr|A0A318TQ15|A0A318TQ15_9BRAD	Zinc protease OS	Rhodopseudomonas faecalis OX	0.51082	1.07487	3
tr|F8WYL9|F8WYL9_9BACT	Uncharacterized protein OS	Dysgonomonas mossii DSM 22836 OX	0.77094	1.075	2
tr|A0A318TBQ9|A0A318TBQ9_9BRAD	Dihydrolipoyl dehydrogenase OS	Rhodopseudomonas faecalis OX	0.28028	1.07543	10
tr|A0A4U1JNZ2|A0A4U1JNZ2_RHOCA	Quinone oxidoreductase OS	Rhodobacter capsulatus OX	0.73121	1.07551	2
tr|A0A318TDC1|A0A318TDC1_9BRAD	Uncharacterized protein (DUF934 family) OS	Rhodopseudomonas faecalis OX	0.50028	1.07563	7
tr|A0A318TAZ7|A0A318TAZ7_9BRAD	Methylenetetrahydrofolate reductase OS	Rhodopseudomonas faecalis OX	0.44548	1.07628	10
tr|A0A318T8V3|A0A318T8V3_9BRAD	Fumarate hydratase class I OS	Rhodopseudomonas faecalis OX	0.32741	1.07636	10
tr|A0A318T9K0|A0A318T9K0_9BRAD	DNA helicase OS	Rhodopseudomonas faecalis OX	0.63247	1.07654	1
tr|A0A318TNV0|A0A318TNV0_9BRAD	Tyrosine--tRNA ligase OS	Rhodopseudomonas faecalis OX	0.30184	1.07681	10
tr|A0A318TCB8|A0A318TCB8_9BRAD	N6-L-threonylcarbamoyladenine synthase/tRNA threonylcarbamoyladenosine biosynthesis protein TsaB OS	Rhodopseudomonas faecalis OX	0.51231	1.07689	1
tr|A0A0Q0QSE7|A0A0Q0QSE7_RHOCA	Uncharacterized protein OS	Rhodobacter capsulatus OX	0.82893	1.07699	2
tr|A0A318TFI7|A0A318TFI7_9BRAD	Uncharacterized protein OS	Rhodopseudomonas faecalis OX	0.8073	1.07808	1
tr|A0A2T4J4F7|A0A2T4J4F7_RHOBL	30S ribosomal protein S7 OS	Rhodobacter blasticus DSM 2131 OX	0.65219	1.07814	1
tr|A0A318TAD8|A0A318TAD8_9BRAD	30S ribosomal protein S17 OS	Rhodopseudomonas faecalis OX	0.30898	1.07821	4
tr|A0A318TG44|A0A318TG44_9BRAD	50S ribosomal protein L35 OS	Rhodopseudomonas faecalis OX	0.71569	1.07837	1
tr|A0A318TL61|A0A318TL61_9BRAD	Glutamate synthase (NADH) small subunit OS	Rhodopseudomonas faecalis OX	0.1601	1.07848	10
tr|A0A318TR14|A0A318TR14_9BRAD	UDP-3-O-acylglucosamine N-acyltransferase OS	Rhodopseudomonas faecalis OX	0.34127	1.07947	3
tr|A0A318T8Y8|A0A318T8Y8_9BRAD	30S ribosomal protein S11 OS	Rhodopseudomonas faecalis OX	0.39384	1.08016	6
tr|A0A318TRV9|A0A318TRV9_9BRAD	Integration host factor subunit beta OS	Rhodopseudomonas faecalis OX	0.2775	1.08034	2
tr|A0A318TFF5|A0A318TFF5_9BRAD	Endolytic murein transglycosylase OS	Rhodopseudomonas faecalis OX	0.54809	1.08035	3
tr|A0A318TN96|A0A318TN96_9BRAD	O-succinylhomoserine sulfhydrylase OS	Rhodopseudomonas faecalis OX	0.70586	1.08036	7
tr|D5AQ62|D5AQ62_RHOCB	Probable transcriptional regulatory protein RCAP_rcc00884 OS	Rhodobacter capsulatus (strain ATCC BAA-309 / NBRC 16581 / SB1003) OX	0.71671	1.08065	2
tr|A0A318T8V5|A0A318T8V5_9BRAD	4-hydroxy-3-methylbut-2-en-1-yl diphosphate synthase (flavodoxin) OS	Rhodopseudomonas faecalis OX	0.38422	1.08088	10
tr|A0A318TF62|A0A318TF62_9BRAD	Aminotransferase OS	Rhodopseudomonas faecalis OX	0.51636	1.08104	4
tr|A0A318T9X4|A0A318T9X4_9BRAD	Tryptophan--tRNA ligase OS	Rhodopseudomonas faecalis OX	0.39693	1.08111	7
tr|A0A318THV8|A0A318THV8_9BRAD	Ribosomal RNA large subunit methyltransferase J OS	Rhodopseudomonas faecalis OX	0.5752	1.08134	1
tr|A0A318TEK0|A0A318TEK0_9BRAD	ATP synthase subunit b OS	Rhodopseudomonas faecalis OX	0.3915	1.08143	7
tr|A0A318THT2|A0A318THT2_9BRAD	Pseudouridine synthase OS	Rhodopseudomonas faecalis OX	0.35798	1.08149	2
tr|A0A318TFN3|A0A318TFN3_9BRAD	Rubrerythrin OS	Rhodopseudomonas faecalis OX	0.54535	1.08166	1
tr|A0A4U1JT70|A0A4U1JT70_RHOCA	Fe-S cluster assembly ATPase SufC OS	Rhodobacter capsulatus OX	0.7185	1.08166	2
tr|A0A318TA94|A0A318TA94_9BRAD	UPF0235 protein BJ122_11611 OS	Rhodopseudomonas faecalis OX	0.71245	1.08196	1
tr|A0A318TDR9|A0A318TDR9_9BRAD	Uncharacterized protein DUF2478 OS	Rhodopseudomonas faecalis OX	0.76492	1.08208	1
tr|A0A318TFE9|A0A318TFE9_9BRAD	Transketolase OS	Rhodopseudomonas faecalis OX	0.27182	1.08212	10
tr|F8WVS7|F8WVS7_9BACT	50S ribosomal protein L2 OS	Dysgonomonas mossii DSM 22836 OX	0.74324	1.08231	1
tr|A0A318TEL3|A0A318TEL3_9BRAD	Dihydroorotase OS	Rhodopseudomonas faecalis OX	0.33641	1.08238	9
tr|A0A318TBK3|A0A318TBK3_9BRAD	30S ribosomal protein S1 OS	Rhodopseudomonas faecalis OX	0.39506	1.08256	9
tr|A0A318TG50|A0A318TG50_9BRAD	Alpha-ketoglutarate dehydrogenase OS	Rhodopseudomonas faecalis OX	0.24729	1.08309	10
tr|D5AQ41|D5AQ41_RHOCB	50S ribosomal protein L13 OS	Rhodobacter capsulatus (strain ATCC BAA-309 / NBRC 16581 / SB1003) OX	0.63844	1.08351	2
tr|A0A318TLP4|A0A318TLP4_9BRAD	D-aminopeptidase OS	Rhodopseudomonas faecalis OX	0.42655	1.0836	2
tr|A0A318TNQ5|A0A318TNQ5_9BRAD	Arginine--tRNA ligase OS	Rhodopseudomonas faecalis OX	0.09245	1.08363	9
tr|A0A318TFB6|A0A318TFB6_9BRAD	Inorganic pyrophosphatase OS	Rhodopseudomonas faecalis OX	0.66684	1.08389	9
tr|V7EGF8|V7EGF8_9RHOB	Nitrate ABC transporter substrate-binding protein OS	Rhodobacter sp. CACIA14H1 OX	0.71117	1.08401	1
tr|A0A318TSX4|A0A318TSX4_9BRAD	Mg-protoporphyrin IX chelatase OS	Rhodopseudomonas faecalis OX	0.28052	1.0841	9
tr|A0A318TEJ1|A0A318TEJ1_9BRAD	Precorrin-4 C11-methyltransferase OS	Rhodopseudomonas faecalis OX	0.50921	1.08411	5
tr|A0A418VQZ0|A0A418VQZ0_RHOPL	RNA-binding protein Hfq OS	Rhodopseudomonas palustris OX	0.57399	1.08464	3
tr|A0A318T788|A0A318T788_9BRAD	Amino acid/amide ABC transporter substrate-binding protein (HAAT family) OS	Rhodopseudomonas faecalis OX	0.5375	1.08472	8
tr|A0A4U1JNA3|A0A4U1JNA3_RHOCA	Sigma-54-dependent Fis family transcriptional regulator OS	Rhodobacter capsulatus OX	0.82867	1.08514	1
tr|A0A318T7U9|A0A318T7U9_9BRAD	Imidazole glycerol phosphate synthase subunit HisH OS	Rhodopseudomonas faecalis OX	0.36909	1.08544	3
tr|A0A318TU49|A0A318TU49_9BRAD	Acetyltransferase (GNAT) family protein OS	Rhodopseudomonas faecalis OX	0.76057	1.08583	7
tr|A0A318T9X3|A0A318T9X3_9BRAD	Arginine biosynthesis bifunctional protein ArgJ OS	Rhodopseudomonas faecalis OX	0.33129	1.086	9
tr|A0A318TQZ6|A0A318TQZ6_9BRAD	Ribonuclease J OS	Rhodopseudomonas faecalis OX	0.27638	1.08607	4
tr|A0A1G7FV26|A0A1G7FV26_RHOCA	50S ribosomal protein L15 OS	Rhodobacter capsulatus OX	0.69637	1.08612	3
tr|A0A318TNW9|A0A318TNW9_9BRAD	Signal transduction histidine kinase OS	Rhodopseudomonas faecalis OX	0.57347	1.08619	1
tr|A0A318TYS3|A0A318TYS3_9BRAD	Cupin_2 domain-containing protein OS	Rhodopseudomonas faecalis OX	0.84086	1.08695	1
tr|A0A318TLP0|A0A318TLP0_9BRAD	Transcriptional regulator PpsR OS	Rhodopseudomonas faecalis OX	0.35916	1.08706	10
tr|A0A318TH04|A0A318TH04_9BRAD	Short chain enoyl-CoA hydratase /3-hydroxyacyl-CoA dehydrogenase OS	Rhodopseudomonas faecalis OX	0.56887	1.08718	4
tr|A0A4U1JQ33|A0A4U1JQ33_RHOCA	Translation initiation factor IF-2 OS	Rhodobacter capsulatus OX	0.69882	1.08722	3
tr|A0A318TE85|A0A318TE85_9BRAD	Uncharacterized protein YndB with AHSA1/START domain OS	Rhodopseudomonas faecalis OX	0.12546	1.08745	2
tr|A0A318TKA7|A0A318TKA7_9BRAD	Xanthine-guanine phosphoribosyltransferase OS	Rhodopseudomonas faecalis OX	0.57968	1.08748	2
tr|A0A318T995|A0A318T995_9BRAD	30S ribosomal protein S8 OS	Rhodopseudomonas faecalis OX	0.13895	1.08803	6
tr|D5AP19|D5AP19_RHOCB	Sterol-binding domain protein OS	Rhodobacter capsulatus (strain ATCC BAA-309 / NBRC 16581 / SB1003) OX	0.74757	1.08814	3
tr|A0A318TI74|A0A318TI74_9BRAD	Chlorophyllide reductase subunit Y OS	Rhodopseudomonas faecalis OX	0.49036	1.08839	9
tr|A0A318T8K7|A0A318T8K7_9BRAD	Ferric uptake regulation protein OS	Rhodopseudomonas faecalis OX	0.27533	1.08851	5
PepCalMix	PepCalMix		0.42163	1.08856	10
tr|A0A318T7V2|A0A318T7V2_9BRAD	Histidine kinase OS	Rhodopseudomonas faecalis OX	0.6198	1.08868	9
tr|B3QH51|B3QH51_RHOPT	Peptide chain release factor 2 OS	Rhodopseudomonas palustris (strain TIE-1) OX	0.36857	1.08876	1
tr|A0A318TFB7|A0A318TFB7_9BRAD	AsnC family transcriptional regulator OS	Rhodopseudomonas faecalis OX	0.30065	1.08897	2
tr|A0A318TAU2|A0A318TAU2_9BRAD	Two component Fis family sigma54 specific transcriptional regulator OS	Rhodopseudomonas faecalis OX	0.36116	1.08899	9
tr|A0A318TLA6|A0A318TLA6_9BRAD	Pyruvate dehydrogenase E1 component subunit alpha OS	Rhodopseudomonas faecalis OX	0.3994	1.08921	2
tr|A0A318TQB9|A0A318TQB9_9BRAD	dTTP/UTP pyrophosphatase OS	Rhodopseudomonas faecalis OX	0.35981	1.08961	1
tr|A0A318TF11|A0A318TF11_9BRAD	DNA polymerase III delta subunit OS	Rhodopseudomonas faecalis OX	0.43914	1.08962	1
tr|A0A318TJD8|A0A318TJD8_9BRAD	D-3-phosphoglycerate dehydrogenase OS	Rhodopseudomonas faecalis OX	0.49165	1.08963	2
tr|A0A318TNY3|A0A318TNY3_9BRAD	Phosphoserine phosphatase OS	Rhodopseudomonas faecalis OX	0.09881	1.08972	5
tr|A0A318TCD1|A0A318TCD1_9BRAD	Universal stress protein family protein OS	Rhodopseudomonas faecalis OX	0.55057	1.09002	1
tr|A0A318TA01|A0A318TA01_9BRAD	Putative ABC transport system ATP-binding protein OS	Rhodopseudomonas faecalis OX	0.41195	1.09035	2
tr|A0A318TFR2|A0A318TFR2_9BRAD	Pyridoxine 5'-phosphate synthase OS	Rhodopseudomonas faecalis OX	0.2732	1.09036	5
tr|D5AR60|D5AR60_RHOCB	Cold shock-like protein CspD OS	Rhodobacter capsulatus (strain ATCC BAA-309 / NBRC 16581 / SB1003) OX	0.83296	1.09041	1
tr|A0A318TDW0|A0A318TDW0_9BRAD	Putative protease OS	Rhodopseudomonas faecalis OX	0.50003	1.09066	7
tr|A0A318THU5|A0A318THU5_9BRAD	Alanine racemase OS	Rhodopseudomonas faecalis OX	0.30404	1.09084	7
tr|A0A4U1JN71|A0A4U1JN71_RHOCA	50S ribosomal protein L5 OS	Rhodobacter capsulatus OX	0.80114	1.09123	4
tr|A0A318TK06|A0A318TK06_9BRAD	Uncharacterized protein OS	Rhodopseudomonas faecalis OX	0.57531	1.09134	3
tr|A0A318TAJ1|A0A318TAJ1_9BRAD	50S ribosomal protein L5 OS	Rhodopseudomonas faecalis OX	0.18752	1.09179	9
tr|A0A318THL5|A0A318THL5_9BRAD	Probable cytosol aminopeptidase OS	Rhodopseudomonas faecalis OX	0.24754	1.09182	9
tr|A0A318TA69|A0A318TA69_9BRAD	Adenylate kinase OS	Rhodopseudomonas faecalis OX	0.05128	1.09183	8
tr|D2TMQ5|D2TMQ5_CITRI	Hydrolase_4 domain-containing protein OS	Citrobacter rodentium (strain ICC168) OX	0.71056	1.09184	1
tr|D2TUD6|D2TUD6_CITRI	Isocitrate dehydrogenase [NADP] OS	Citrobacter rodentium (strain ICC168) OX	0.66624	1.09228	1
tr|A0A318TKQ9|A0A318TKQ9_9BRAD	PadR family transcriptional regulator OS	Rhodopseudomonas faecalis OX	0.79765	1.09231	1
tr|A0A318TIB0|A0A318TIB0_9BRAD	Homoserine dehydrogenase OS	Rhodopseudomonas faecalis OX	0.07511	1.09275	10
tr|A0A4Y9IMV1|A0A4Y9IMV1_9BACT	50S ribosomal protein L17 OS	Dysgonomonas mossii OX	0.64381	1.09279	1
tr|A0A318TIV3|A0A318TIV3_9BRAD	Riboflavin biosynthesis protein RibD OS	Rhodopseudomonas faecalis OX	0.21618	1.09293	1
tr|A0A318U0T6|A0A318U0T6_9BRAD	Beta-N-acetylhexosaminidase OS	Rhodopseudomonas faecalis OX	0.0963	1.09293	2
tr|A0A6B3RLD0|A0A6B3RLD0_9RHOB	50S ribosomal protein L7/L12 OS	Rhodobacter sp. ETT8 OX	0.79365	1.09326	1
tr|A0A318TA32|A0A318TA32_9BRAD	Protein translocase subunit SecA OS	Rhodopseudomonas faecalis OX	0.19438	1.09352	10
tr|A0A318TCC6|A0A318TCC6_9BRAD	Acetyl-coenzyme A carboxylase carboxyl transferase subunit beta OS	Rhodopseudomonas faecalis OX	0.26433	1.09407	6
tr|A0A318TNP4|A0A318TNP4_9BRAD	Pyruvate dehydrogenase E1 component subunit beta OS	Rhodopseudomonas faecalis OX	0.22914	1.09465	7
tr|A0A318THU9|A0A318THU9_9BRAD	CRISPR-associated Cas5d family protein OS	Rhodopseudomonas faecalis OX	0.72123	1.09484	1
tr|A0A323UNF9|A0A323UNF9_RHOPL	Phosphoserine phosphatase SerB OS	Rhodopseudomonas palustris OX	0.63617	1.0951	1
tr|A0A318TIA8|A0A318TIA8_9BRAD	Glutamate synthase (NADH) large subunit OS	Rhodopseudomonas faecalis OX	0.29842	1.09527	9
tr|A0A318TWL5|A0A318TWL5_9BRAD	Isoleucine--tRNA ligase OS	Rhodopseudomonas faecalis OX	0.10462	1.09542	9
tr|A0A318T710|A0A318T710_9BRAD	Formyltetrahydrofolate deformylase OS	Rhodopseudomonas faecalis OX	0.35095	1.09609	5
tr|F8WZP0|F8WZP0_9BACT	Thioredoxin OS	Dysgonomonas mossii DSM 22836 OX	0.71931	1.09617	1
tr|A0A318T9Z2|A0A318T9Z2_9BRAD	Amino acid ABC transporter substrate-binding protein (PAAT family) OS	Rhodopseudomonas faecalis OX	0.47565	1.09694	5
tr|A0A318TFQ3|A0A318TFQ3_9BRAD	3-oxoacyl-[acyl-carrier-protein] reductase OS	Rhodopseudomonas faecalis OX	0.21126	1.09739	3
tr|A0A521IGY0|A0A521IGY0_9SPIO	NifU_N domain-containing protein OS	Treponema sp. OX	0.35463	1.09744	1
tr|A0A318T7Z4|A0A318T7Z4_9BRAD	4-hydroxy-tetrahydrodipicolinate synthase OS	Rhodopseudomonas faecalis OX	0.58679	1.09776	1
tr|A0A318TJ48|A0A318TJ48_9BRAD	Precorrin-8X methylmutase OS	Rhodopseudomonas faecalis OX	0.31698	1.09791	4
tr|A4WNI2|A4WNI2_RHOS5	Aspartate-semialdehyde dehydrogenase OS	Rhodobacter sphaeroides (strain ATCC 17025 / ATH 2.4.3) OX	0.60245	1.0981	1
tr|A0A318T8H9|A0A318T8H9_9BRAD	Succinate dehydrogenase flavoprotein subunit OS	Rhodopseudomonas faecalis OX	0.16788	1.09811	9
tr|A0A318TEP0|A0A318TEP0_9BRAD	50S ribosomal protein L10 OS	Rhodopseudomonas faecalis OX	0.13399	1.09819	10
tr|A0A182D074|A0A182D074_BLAVI	DNA gyrase subunit B OS	Blastochloris viridis OX	0.60815	1.09824	1
tr|A0A318TEE2|A0A318TEE2_9BRAD	2Fe-2S ferredoxin OS	Rhodopseudomonas faecalis OX	0.19666	1.09847	3
tr|Q213R5|Q213R5_RHOPB	N-acetyl-gamma-glutamyl-phosphate reductase OS	Rhodopseudomonas palustris (strain BisB18) OX	0.34937	1.09859	1
tr|A0A1H8UTA0|A0A1H8UTA0_9BRAD	Flagellin OS	Rhodopseudomonas pseudopalustris OX	0.71582	1.09895	2
tr|A0A318T815|A0A318T815_9BRAD	S41A family C-terminal processing peptidase-3 OS	Rhodopseudomonas faecalis OX	0.42905	1.09905	10
tr|A0A318TCS1|A0A318TCS1_9BRAD	50S ribosomal protein L22 OS	Rhodopseudomonas faecalis OX	0.4495	1.09919	7
tr|A0A318TI59|A0A318TI59_9BRAD	Pyruvate-ferredoxin/flavodoxin oxidoreductase OS	Rhodopseudomonas faecalis OX	0.29468	1.09989	10
tr|A0A318TJR7|A0A318TJR7_9BRAD	AhpD family alkylhydroperoxidase OS	Rhodopseudomonas faecalis OX	0.06704	1.10007	2
tr|A0A318TNM6|A0A318TNM6_9BRAD	Acyl-[acyl-carrier-protein]--UDP-N-acetylglucosamine O-acyltransferase OS	Rhodopseudomonas faecalis OX	0.11532	1.10012	2
tr|D2TJS9|D2TJS9_CITRI	Aldehyde dehydrogenase B OS	Citrobacter rodentium (strain ICC168) OX	0.63252	1.10022	1
tr|A0A318TN41|A0A318TN41_9BRAD	Geranyl-CoA carboxylase alpha subunit OS	Rhodopseudomonas faecalis OX	0.62789	1.10034	2
tr|A0A318TLG0|A0A318TLG0_9BRAD	Glutamate--tRNA ligase OS	Rhodopseudomonas faecalis OX	0.17307	1.1008	10
tr|A0A318TN89|A0A318TN89_9BRAD	Putative NAD(P)H nitroreductase OS	Rhodopseudomonas faecalis OX	0.1397	1.10084	6
tr|A0A318TDJ5|A0A318TDJ5_9BRAD	PhnB protein OS	Rhodopseudomonas faecalis OX	0.53384	1.10121	1
tr|A0A318TBD7|A0A318TBD7_9BRAD	L-lactate dehydrogenase (Cytochrome) OS	Rhodopseudomonas faecalis OX	0.32082	1.10127	1
tr|A0A318TNQ7|A0A318TNQ7_9BRAD	CarD family transcriptional regulator OS	Rhodopseudomonas faecalis OX	0.37898	1.10164	7
tr|A0A318T7Y2|A0A318T7Y2_9BRAD	Imidazoleglycerol-phosphate dehydratase OS	Rhodopseudomonas faecalis OX	0.21402	1.10178	3
tr|A0A1G7H8S2|A0A1G7H8S2_RHOCA	Bifunctional enzyme IspD/IspF OS	Rhodobacter capsulatus OX	0.58939	1.10205	2
tr|A0A318THE7|A0A318THE7_9BRAD	Single-stranded DNA-binding protein OS	Rhodopseudomonas faecalis OX	0.22849	1.1023	7
tr|A0A318TJF9|A0A318TJF9_9BRAD	Glutathione S-transferase OS	Rhodopseudomonas faecalis OX	0.22679	1.10271	7
tr|A0A318T7Y9|A0A318T7Y9_9BRAD	Acetyl-coenzyme A carboxylase carboxyl transferase subunit alpha OS	Rhodopseudomonas faecalis OX	0.25388	1.10291	7
tr|A0A318TI76|A0A318TI76_9BRAD	Ribonuclease BN (tRNA processing enzyme) OS	Rhodopseudomonas faecalis OX	0.3702	1.10293	2
tr|A0A318TF09|A0A318TF09_9BRAD	Nitrogen regulatory protein P-II OS	Rhodopseudomonas faecalis OX	0.7993	1.10313	10
tr|A0A318TFE8|A0A318TFE8_9BRAD	Uncharacterized protein OS	Rhodopseudomonas faecalis OX	0.70923	1.10337	10
tr|A0A318TV31|A0A318TV31_9BRAD	Fructose-1,6-bisphosphatase OS	Rhodopseudomonas faecalis OX	0.14333	1.10353	10
tr|A0A318TIU0|A0A318TIU0_9BRAD	Prephenate dehydratase OS	Rhodopseudomonas faecalis OX	0.12532	1.10365	2
tr|F8WZN2|F8WZN2_9BACT	Ferredoxin OS	Dysgonomonas mossii DSM 22836 OX	0.73203	1.10367	1
tr|A0A318TLM3|A0A318TLM3_9BRAD	Pimeloyl-ACP methyl ester carboxylesterase OS	Rhodopseudomonas faecalis OX	0.54989	1.10447	10
tr|A0A318TAB1|A0A318TAB1_9BRAD	Malate synthase G OS	Rhodopseudomonas faecalis OX	0.16226	1.10451	10
tr|A0A318TQM2|A0A318TQM2_9BRAD	Putative Zn-finger protein OS	Rhodopseudomonas faecalis OX	0.60058	1.10463	1
tr|A0A318TDU0|A0A318TDU0_9BRAD	Precorrin-6Y C5,15-methyltransferase (Decarboxylating) OS	Rhodopseudomonas faecalis OX	0.09978	1.10494	1
tr|A0A1H8LS04|A0A1H8LS04_9BRAD	dTTP/UTP pyrophosphatase OS	Rhodopseudomonas pseudopalustris OX	0.13594	1.10497	1
tr|A8AIH2|A8AIH2_CITK8	30S ribosomal protein S1 OS	Citrobacter koseri (strain ATCC BAA-895 / CDC 4225-83 / SGSC4696) OX	0.47354	1.10507	3
tr|A0A318TAK3|A0A318TAK3_9BRAD	50S ribosomal protein L23 OS	Rhodopseudomonas faecalis OX	0.27366	1.10546	5
tr|A0A2T4J3W1|A0A2T4J3W1_RHOBL	ABC transporter substrate-binding protein (Fragment) OS	Rhodobacter blasticus DSM 2131 OX	0.75281	1.10551	1
tr|A0A318TWV5|A0A318TWV5_9BRAD	4-diphosphocytidyl-2-C-methyl-D-erythritol kinase OS	Rhodopseudomonas faecalis OX	0.22203	1.10617	7
tr|A0A318TFY2|A0A318TFY2_9BRAD	Uncharacterized protein OS	Rhodopseudomonas faecalis OX	0.10687	1.10643	10
tr|A0A318TBI0|A0A318TBI0_9BRAD	NADH dehydrogenase subunit G OS	Rhodopseudomonas faecalis OX	0.18912	1.10672	3
tr|V7ELF4|V7ELF4_9RHOB	Cold-shock protein OS	Rhodobacter sp. CACIA14H1 OX	0.88193	1.10707	1
tr|A0A318TPC7|A0A318TPC7_9BRAD	Fe-S cluster biogenesis protein NfuA OS	Rhodopseudomonas faecalis OX	0.32401	1.1071	7
tr|A0A0Q0QTA9|A0A0Q0QTA9_RHOCA	Universal stress protein family protein OS	Rhodobacter capsulatus OX	0.41821	1.10743	9
tr|A0A318U086|A0A318U086_9BRAD	Putative circularly permuted ATP-grasp superfamily protein OS	Rhodopseudomonas faecalis OX	0.48337	1.10773	7
tr|A0A318TDP2|A0A318TDP2_9BRAD	Uncharacterized protein GlcG (DUF336 family) OS	Rhodopseudomonas faecalis OX	0.49245	1.10785	3
tr|A0A318TCE3|A0A318TCE3_9BRAD	Quinol monooxygenase YgiN OS	Rhodopseudomonas faecalis OX	0.09108	1.1079	1
tr|A0A318TE70|A0A318TE70_9BRAD	Translation initiation factor 3 (BIF-3) OS	Rhodopseudomonas faecalis OX	0.36213	1.10823	2
tr|A0A318TEB0|A0A318TEB0_9BRAD	Effector-binding domain-containing protein OS	Rhodopseudomonas faecalis OX	0.13128	1.10876	4
tr|A0A318TJP1|A0A318TJP1_9BRAD	Aspartyl/glutamyl-tRNA(Asn/Gln) amidotransferase subunit C OS	Rhodopseudomonas faecalis OX	0.22752	1.10913	2
tr|A0A318TIC4|A0A318TIC4_9BRAD	Putative PIG3 family NAD(P)H quinone oxidoreductase OS	Rhodopseudomonas faecalis OX	0.41679	1.10963	5
tr|A0A318TGJ7|A0A318TGJ7_9BRAD	3',5'-cyclic AMP phosphodiesterase CpdA OS	Rhodopseudomonas faecalis OX	0.37737	1.1099	1
tr|A0A318TJU8|A0A318TJU8_9BRAD	4-hydroxy-tetrahydrodipicolinate reductase OS	Rhodopseudomonas faecalis OX	0.06945	1.10998	6
tr|A0A318TJ20|A0A318TJ20_9BRAD	Trehalose 6-phosphate synthase OS	Rhodopseudomonas faecalis OX	0.5779	1.11073	1
sp|Q20X63|TOLB_RHOPB	Tol-Pal system protein TolB OS	Rhodopseudomonas palustris (strain BisB18) OX	0.16786	1.11094	2
tr|A0A0Q0UEJ4|A0A0Q0UEJ4_RHOCA	Glycine betaine/proline transport system substrate-binding protein OS	Rhodobacter capsulatus OX	0.68384	1.11107	6
tr|A0A318TA97|A0A318TA97_9BRAD	Peptidyl-tRNA hydrolase OS	Rhodopseudomonas faecalis OX	0.32852	1.11151	1
tr|A0A318TIK2|A0A318TIK2_9BRAD	HlyD family secretion protein OS	Rhodopseudomonas faecalis OX	0.16086	1.11187	5
tr|A0A318TMT0|A0A318TMT0_9BRAD	Acetylglutamate kinase OS	Rhodopseudomonas faecalis OX	0.17032	1.11194	10
tr|A0A318TAY8|A0A318TAY8_9BRAD	Signal recognition particle protein OS	Rhodopseudomonas faecalis OX	0.13438	1.11223	7
tr|A0A318TD85|A0A318TD85_9BRAD	Inositol-1-monophosphatase OS	Rhodopseudomonas faecalis OX	0.20777	1.11229	6
tr|A0A318TEN0|A0A318TEN0_9BRAD	Glycerol kinase OS	Rhodopseudomonas faecalis OX	0.28975	1.11255	4
tr|A0A318TF91|A0A318TF91_9BRAD	Uncharacterized protein OS	Rhodopseudomonas faecalis OX	0.59008	1.11293	3
tr|A0A318TK56|A0A318TK56_9BRAD	2-isopropylmalate synthase OS	Rhodopseudomonas faecalis OX	0.41739	1.11326	10
tr|A0A1N7KX83|A0A1N7KX83_9RHOB	50S ribosomal protein L18 OS	Rhodobacter vinaykumarii OX	0.7003	1.11379	1
tr|A0A318TNF7|A0A318TNF7_9BRAD	Phosphoribosylformylglycinamidine cyclo-ligase OS	Rhodopseudomonas faecalis OX	0.17337	1.11399	9
tr|A0A318TQY3|A0A318TQY3_9BRAD	NADH-quinone oxidoreductase subunit F OS	Rhodopseudomonas faecalis OX	0.13742	1.11403	4
tr|A0A318TCA8|A0A318TCA8_9BRAD	Outer membrane protein OmpA-like peptidoglycan-associated protein OS	Rhodopseudomonas faecalis OX	0.27475	1.11415	9
tr|A0A318TAR6|A0A318TAR6_9BRAD	Cell cycle transcriptional regulator CtrA OS	Rhodopseudomonas faecalis OX	0.35185	1.11418	4
tr|A0A318TFZ6|A0A318TFZ6_9BRAD	Chlorophyllide reductase iron protein subunit X OS	Rhodopseudomonas faecalis OX	0.39343	1.11436	10
tr|A0A318TER1|A0A318TER1_9BRAD	Malonyl-CoA/methylmalonyl-CoA synthetase OS	Rhodopseudomonas faecalis OX	0.3938	1.11519	4
tr|A0A318TBR9|A0A318TBR9_9BRAD	Aspartate-semialdehyde dehydrogenase OS	Rhodopseudomonas faecalis OX	0.26051	1.11527	9
tr|A0A1G7RN67|A0A1G7RN67_RHOCA	Acetyl-coenzyme A synthetase N-terminus (Fragment) OS	Rhodobacter capsulatus OX	0.617	1.11547	1
tr|A0A318TH55|A0A318TH55_9BRAD	Leucine--tRNA ligase OS	Rhodopseudomonas faecalis OX	0.22353	1.1156	9
tr|A0A318TC65|A0A318TC65_9BRAD	Signal recognition particle receptor FtsY OS	Rhodopseudomonas faecalis OX	0.11423	1.11664	8
tr|A0A318TMG1|A0A318TMG1_9BRAD	Uncharacterized protein OS	Rhodopseudomonas faecalis OX	0.04544	1.11686	2
tr|F5IWU0|F5IWU0_9BACT	Uncharacterized protein OS	Dysgonomonas gadei ATCC BAA-286 OX	0.11666	1.11687	1
tr|A0A318TI34|A0A318TI34_9BRAD	Phosphoglucomutase OS	Rhodopseudomonas faecalis OX	0.08834	1.11719	7
tr|A0A318TL28|A0A318TL28_9BRAD	Carbamoyl-phosphate synthase large chain OS	Rhodopseudomonas faecalis OX	0.14441	1.1172	9
tr|R8WR49|R8WR49_9ENTR	50S ribosomal protein L22 OS	Citrobacter sp. KTE151 OX	0.45519	1.11743	1
tr|A0A318TIX4|A0A318TIX4_9BRAD	DNA-directed RNA polymerase subunit omega OS	Rhodopseudomonas faecalis OX	0.25663	1.11756	7
tr|A0A318TBA6|A0A318TBA6_9BRAD	3-isopropylmalate dehydrogenase OS	Rhodopseudomonas faecalis OX	0.17698	1.11845	9
tr|A0A318TF40|A0A318TF40_9BRAD	Biotin carboxylase OS	Rhodopseudomonas faecalis OX	0.13832	1.11848	9
tr|A0A318TBE3|A0A318TBE3_9BRAD	Phosphoserine aminotransferase OS	Rhodopseudomonas faecalis OX	0.06698	1.1185	10
tr|A0A318TJ09|A0A318TJ09_9BRAD	Uncharacterized protein DUF2848 OS	Rhodopseudomonas faecalis OX	0.32058	1.11856	10
tr|A0A318TU15|A0A318TU15_9BRAD	Precorrin-2/cobalt-factor-2 C20-methyltransferase OS	Rhodopseudomonas faecalis OX	0.22369	1.11864	1
tr|A0A6L5E7N6|A0A6L5E7N6_9ENTR	Molecular chaperone DnaK OS	Citrobacter sp. NMI7905_11 OX	0.47984	1.11866	1
tr|A0A318TK07|A0A318TK07_9BRAD	Histidinol dehydrogenase OS	Rhodopseudomonas faecalis OX	0.05611	1.11873	8
tr|A0A318T9T6|A0A318T9T6_9BRAD	Translation initiation factor IF-2 OS	Rhodopseudomonas faecalis OX	0.19787	1.11908	10
tr|A0A318THE5|A0A318THE5_9BRAD	ATP-dependent Clp protease ATP-binding subunit ClpA OS	Rhodopseudomonas faecalis OX	0.55428	1.11963	8
tr|A0A318TXV7|A0A318TXV7_9BRAD	D-methionine transport system substrate-binding protein OS	Rhodopseudomonas faecalis OX	0.74996	1.11971	10
tr|A0A318TM32|A0A318TM32_9BRAD	Uncharacterized protein OS	Rhodopseudomonas faecalis OX	0.64842	1.12022	2
tr|A0A318TD31|A0A318TD31_9BRAD	Cytochrome c OS	Rhodopseudomonas faecalis OX	0.48228	1.12048	10
tr|A0A318TEE0|A0A318TEE0_9BRAD	Uncharacterized protein OS	Rhodopseudomonas faecalis OX	0.48431	1.12057	1
tr|A0A1G7QDL9|A0A1G7QDL9_RHOCA	Glutamate synthase (NADPH/NADH) large chain OS	Rhodobacter capsulatus OX	0.57025	1.12065	2
tr|A0A318TR75|A0A318TR75_9BRAD	Ubiquinol-cytochrome c reductase iron-sulfur subunit OS	Rhodopseudomonas faecalis OX	0.22517	1.1207	6
tr|A0A4U1JNB6|A0A4U1JNB6_RHOCA	Sugar ABC transporter substrate-binding protein OS	Rhodobacter capsulatus OX	0.52072	1.12077	5
tr|A0A318TN54|A0A318TN54_9BRAD	Uncharacterized protein OS	Rhodopseudomonas faecalis OX	0.38105	1.12111	3
tr|A0A318U0G9|A0A318U0G9_9BRAD	Xre family transcriptional regulator OS	Rhodopseudomonas faecalis OX	0.56873	1.1214	2
tr|A0A318TSC4|A0A318TSC4_9BRAD	LysR family transcriptional regulator OS	Rhodopseudomonas faecalis OX	0.06457	1.12171	10
tr|A0A318TI72|A0A318TI72_9BRAD	Parvulin-like PPIase OS	Rhodopseudomonas faecalis OX	0.1739	1.12177	10
tr|A0A318TKE6|A0A318TKE6_9BRAD	Tryptophan synthase alpha chain OS	Rhodopseudomonas faecalis OX	0.15863	1.12187	5
tr|A0A318TCT5|A0A318TCT5_9BRAD	50S ribosomal protein L29 OS	Rhodopseudomonas faecalis OX	0.29234	1.12205	3
tr|A0A318T984|A0A318T984_9BRAD	Uncharacterized protein OS	Rhodopseudomonas faecalis OX	0.55673	1.12259	1
tr|A0A6L5E1U9|A0A6L5E1U9_9ENTR	DNA starvation/stationary phase protection protein Dps OS	Citrobacter sp. NMI7905_11 OX	0.664	1.12268	5
tr|A0A2T4JB90|A0A2T4JB90_RHOBL	50S ribosomal protein L32 OS	Rhodobacter blasticus DSM 2131 OX	0.7307	1.12273	1
tr|A0A212JI75|A0A212JI75_9BACT	Nitroreductase domain-containing protein OS	uncultured Dysgonomonas sp. OX	0.61396	1.12282	1
tr|A0A318T7S5|A0A318T7S5_9BRAD	Isocitrate dehydrogenase [NADP] OS	Rhodopseudomonas faecalis OX	0.2582	1.12324	10
tr|A0A318TF69|A0A318TF69_9BRAD	Phosphopantetheine adenylyltransferase OS	Rhodopseudomonas faecalis OX	0.44722	1.12337	1
tr|A0A318TM38|A0A318TM38_9BRAD	Cell division and transport-associated protein TolA OS	Rhodopseudomonas faecalis OX	0.53124	1.12339	1
tr|A0A318TBB4|A0A318TBB4_9BRAD	Ubiquinone/menaquinone biosynthesis C-methyltransferase UbiE OS	Rhodopseudomonas faecalis OX	0.16739	1.12353	9
tr|A0A318TSZ4|A0A318TSZ4_9BRAD	Chlorin reductase subunit Z OS	Rhodopseudomonas faecalis OX	0.38094	1.12353	9
tr|A0A318TII5|A0A318TII5_9BRAD	50S ribosomal protein L3 OS	Rhodopseudomonas faecalis OX	0.10342	1.12364	9
tr|A0A318TWP3|A0A318TWP3_9BRAD	3,4-dihydroxy-2-butanone 4-phosphate synthase OS	Rhodopseudomonas faecalis OX	0.16074	1.12397	10
tr|A0A318TID6|A0A318TID6_9BRAD	Ribosome-binding ATPase YchF OS	Rhodopseudomonas faecalis OX	0.10305	1.12404	6
tr|R8WPC6|R8WPC6_9ENTR	Thioredoxin OS	Citrobacter sp. KTE151 OX	0.32335	1.12419	2
tr|A0A318THQ8|A0A318THQ8_9BRAD	Uncharacterized protein DUF2849 OS	Rhodopseudomonas faecalis OX	0.49192	1.12426	4
tr|A0A318T7D8|A0A318T7D8_9BRAD	Acetylornithine aminotransferase OS	Rhodopseudomonas faecalis OX	0.2316	1.12442	8
tr|A0A318T6N1|A0A318T6N1_9BRAD	Phosphoribosylformylglycinamidine synthase subunit PurS OS	Rhodopseudomonas faecalis OX	0.09759	1.12475	4
tr|A0A318U0L4|A0A318U0L4_9BRAD	Methylmalonyl-CoA epimerase /ethylmalonyl-CoA epimerase OS	Rhodopseudomonas faecalis OX	0.1825	1.1255	1
tr|A0A318TLD3|A0A318TLD3_9BRAD	Peptidyl-prolyl cis-trans isomerase OS	Rhodopseudomonas faecalis OX	0.13469	1.12585	2
tr|A0A318TAY9|A0A318TAY9_9BRAD	Dual-specificity RNA methyltransferase RlmN OS	Rhodopseudomonas faecalis OX	0.42606	1.12621	3
tr|D5AQL6|D5AQL6_RHOCB	Transcriptional repressor NrdR OS	Rhodobacter capsulatus (strain ATCC BAA-309 / NBRC 16581 / SB1003) OX	0.56085	1.12633	1
tr|A0A318TJ39|A0A318TJ39_9BRAD	Superoxide dismutase OS	Rhodopseudomonas faecalis OX	0.0991	1.12684	5
tr|A0A318TZN1|A0A318TZN1_9BRAD	Alcohol dehydrogenase OS	Rhodopseudomonas faecalis OX	0.07125	1.12727	2
tr|A0A318TVQ2|A0A318TVQ2_9BRAD	Transcription-repair-coupling factor OS	Rhodopseudomonas faecalis OX	0.22825	1.1274	4
tr|A0A318TAQ2|A0A318TAQ2_9BRAD	Uncharacterized protein OS	Rhodopseudomonas faecalis OX	0.06492	1.12787	4
tr|A0A318TCX0|A0A318TCX0_9BRAD	UPF0434 protein BJ122_11275 OS	Rhodopseudomonas faecalis OX	0.4792	1.12817	3
tr|A0A318TIE7|A0A318TIE7_9BRAD	3-dehydroquinate dehydratase OS	Rhodopseudomonas faecalis OX	0.33699	1.12832	1
tr|F8WWI4|F8WWI4_9BACT	PBP_domain domain-containing protein OS	Dysgonomonas mossii DSM 22836 OX	0.68737	1.12838	4
tr|A0A318TPF5|A0A318TPF5_9BRAD	Regulator of RNase E activity RraA OS	Rhodopseudomonas faecalis OX	0.09048	1.12911	3
tr|A0A318T8K1|A0A318T8K1_9BRAD	S-adenosylmethionine synthase OS	Rhodopseudomonas faecalis OX	0.145	1.12912	10
tr|A0A318TAA2|A0A318TAA2_9BRAD	tRNA N6-adenosine threonylcarbamoyltransferase OS	Rhodopseudomonas faecalis OX	0.4126	1.12927	2
tr|A0A318TAC7|A0A318TAC7_9BRAD	50S ribosomal protein L15 OS	Rhodopseudomonas faecalis OX	0.11795	1.12931	9
tr|A0A318TGC4|A0A318TGC4_9BRAD	Peptidase_S15 domain-containing protein OS	Rhodopseudomonas faecalis OX	0.0958	1.12948	4
tr|Q07IZ9|Q07IZ9_RHOP5	D-3-phosphoglycerate dehydrogenase OS	Rhodopseudomonas palustris (strain BisA53) OX	0.16532	1.13057	1
tr|F8X0D5|F8X0D5_9BACT	OmpA-like domain-containing protein OS	Dysgonomonas mossii DSM 22836 OX	0.52323	1.13062	7
tr|A0A318TDH0|A0A318TDH0_9BRAD	Uroporphyrinogen-III synthase OS	Rhodopseudomonas faecalis OX	0.30032	1.13075	7
tr|D5AQ84|D5AQ84_RHOCB	Propionyl-CoA carboxylase, beta subunit OS	Rhodobacter capsulatus (strain ATCC BAA-309 / NBRC 16581 / SB1003) OX	0.49951	1.13105	2
tr|A0A318TWU0|A0A318TWU0_9BRAD	Glycine--tRNA ligase beta subunit OS	Rhodopseudomonas faecalis OX	0.29176	1.13109	6
tr|A0A318TEW9|A0A318TEW9_9BRAD	Carbohydrate ABC transporter substrate-binding protein (CUT1 family) OS	Rhodopseudomonas faecalis OX	0.26706	1.13125	9
tr|A0A318THN8|A0A318THN8_9BRAD	Putative membrane protein OS	Rhodopseudomonas faecalis OX	0.16951	1.13132	2
tr|A0A318TL81|A0A318TL81_9BRAD	Peptide deformylase OS	Rhodopseudomonas faecalis OX	0.23044	1.13134	1
tr|A0A318TNU1|A0A318TNU1_9BRAD	Uncharacterized protein OS	Rhodopseudomonas faecalis OX	0.8235	1.1314	1
tr|A0A318TJT1|A0A318TJT1_9BRAD	Guanylate kinase OS	Rhodopseudomonas faecalis OX	0.65885	1.13153	1
tr|A0A318TZL3|A0A318TZL3_9BRAD	Glutamine-dependent NAD(+) synthetase OS	Rhodopseudomonas faecalis OX	0.16563	1.13154	2
tr|A0A318TEL7|A0A318TEL7_9BRAD	50S ribosomal protein L16 OS	Rhodopseudomonas faecalis OX	0.05846	1.13172	1
tr|A0A1G7IFA6|A0A1G7IFA6_RHOCA	Simple sugar transport system substrate-binding protein OS	Rhodobacter capsulatus OX	0.45273	1.1319	2
tr|A0A1G7FVM3|A0A1G7FVM3_RHOCA	50S ribosomal protein L6 OS	Rhodobacter capsulatus OX	0.72178	1.13212	4
tr|A0A318TDT8|A0A318TDT8_9BRAD	Tol-Pal system protein TolB OS	Rhodopseudomonas faecalis OX	0.1512	1.13224	6
tr|A0A6G8UT15|A0A6G8UT15_9ENTR	Aspartate ammonia-lyase OS	Citrobacter sp. Y3 OX	0.62492	1.13225	4
tr|D4BA07|D4BA07_9ENTR	Superoxide dismutase OS	Citrobacter youngae ATCC 29220 OX	0.20687	1.13279	4
tr|A0A318TBU7|A0A318TBU7_9BRAD	2,3-bisphosphoglycerate-dependent phosphoglycerate mutase OS	Rhodopseudomonas faecalis OX	0.14764	1.1332	7
tr|Q210L2|Q210L2_RHOPB	Cysteine synthase OS	Rhodopseudomonas palustris (strain BisB18) OX	0.61217	1.13324	1
tr|A0A318TGT0|A0A318TGT0_9BRAD	WD-40 repeat-containing protein OS	Rhodopseudomonas faecalis OX	0.21005	1.13325	1
tr|A0A318U0K5|A0A318U0K5_9BRAD	NADH-quinone oxidoreductase OS	Rhodopseudomonas faecalis OX	0.03491	1.13348	10
tr|A0A318TGN9|A0A318TGN9_9BRAD	Cytochrome b pre-mRNA-processing protein 3 OS	Rhodopseudomonas faecalis OX	0.0357	1.13403	7
tr|D4BL00|D4BL00_9ENTR	50S ribosomal protein L10 OS	Citrobacter youngae ATCC 29220 OX	0.06655	1.13417	2
tr|A0A318TCW6|A0A318TCW6_9BRAD	Uncharacterized protein OS	Rhodopseudomonas faecalis OX	0.36416	1.1342	1
tr|A0A318TUC7|A0A318TUC7_9BRAD	1-deoxy-D-xylulose 5-phosphate reductoisomerase OS	Rhodopseudomonas faecalis OX	0.09834	1.13428	6
tr|A0A318TRQ1|A0A318TRQ1_9BRAD	GMP synthase [glutamine-hydrolyzing] OS	Rhodopseudomonas faecalis OX	0.10232	1.13455	10
tr|A0A318TTA4|A0A318TTA4_9BRAD	Serine O-acetyltransferase OS	Rhodopseudomonas faecalis OX	0.67663	1.1346	5
tr|A0A318TNL6|A0A318TNL6_9BRAD	Elongation factor Ts OS	Rhodopseudomonas faecalis OX	0.07948	1.13464	9
tr|A0A318TJS7|A0A318TJS7_9BRAD	Bifunctional glutamine synthetase adenylyltransferase/adenylyl-removing enzyme OS	Rhodopseudomonas faecalis OX	0.12775	1.13482	6
tr|A0A4U1JPI2|A0A4U1JPI2_RHOCA	Urea ABC transporter substrate-binding protein OS	Rhodobacter capsulatus OX	0.7068	1.13485	2
tr|A0A318TMN2|A0A318TMN2_9BRAD	Microcystin-dependent protein OS	Rhodopseudomonas faecalis OX	0.52508	1.13498	1
tr|A0A318T8E7|A0A318T8E7_9BRAD	Uncharacterized protein OS	Rhodopseudomonas faecalis OX	0.36393	1.13529	2
tr|A0A318TKJ5|A0A318TKJ5_9BRAD	TPR repeat protein OS	Rhodopseudomonas faecalis OX	0.20897	1.13569	3
tr|A0A4U1JQ00|A0A4U1JQ00_RHOCA	DNA-directed RNA polymerase subunit beta OS	Rhodobacter capsulatus OX	0.65894	1.13585	4
tr|A0A318TE09|A0A318TE09_9BRAD	Nucleoid DNA-binding protein OS	Rhodopseudomonas faecalis OX	0.26266	1.13665	10
tr|R8X157|R8X157_9ENTR	Hydrolase OS	Citrobacter sp. KTE151 OX	0.37317	1.1367	2
tr|A0A318TCU3|A0A318TCU3_9BRAD	50S ribosomal protein L11 OS	Rhodopseudomonas faecalis OX	0.11531	1.13688	9
tr|D4B880|D4B880_9ENTR	Ferritin OS	Citrobacter youngae ATCC 29220 OX	0.51578	1.13718	1
tr|R8WVP4|R8WVP4_9ENTR	Phosphoenolpyruvate-protein phosphotransferase OS	Citrobacter sp. KTE151 OX	0.61889	1.13732	1
tr|A0A318TR50|A0A318TR50_9BRAD	50S ribosomal protein L20 OS	Rhodopseudomonas faecalis OX	0.05939	1.13739	5
tr|A0A1G7N8A1|A0A1G7N8A1_RHOCA	Putative spermidine/putrescine transport system substrate-binding protein OS	Rhodobacter capsulatus OX	0.56662	1.13797	10
tr|A0A318TJ08|A0A318TJ08_9BRAD	50S ribosomal protein L13 OS	Rhodopseudomonas faecalis OX	0.1027	1.13838	10
tr|A0A318T8U1|A0A318T8U1_9BRAD	AsnC family transcriptional regulator OS	Rhodopseudomonas faecalis OX	0.34523	1.13881	1
tr|A0A318T9A5|A0A318T9A5_9BRAD	30S ribosomal protein S19 OS	Rhodopseudomonas faecalis OX	0.10485	1.13886	6
tr|A0A318TKN1|A0A318TKN1_9BRAD	Uncharacterized protein OS	Rhodopseudomonas faecalis OX	0.13553	1.13888	4
tr|A0A318U3C7|A0A318U3C7_9RHOB	50S ribosomal protein L2 OS	Rhodobacter viridis OX	0.46623	1.13915	3
tr|A0A318T953|A0A318T953_9BRAD	Peptide chain release factor 3 OS	Rhodopseudomonas faecalis OX	0.2177	1.13928	5
tr|A0A318TN57|A0A318TN57_9BRAD	ATP phosphoribosyltransferase OS	Rhodopseudomonas faecalis OX	0.01421	1.1393	7
tr|A0A318TL84|A0A318TL84_9BRAD	TatD DNase family protein OS	Rhodopseudomonas faecalis OX	0.2314	1.13956	1
tr|A0A318TCL0|A0A318TCL0_9BRAD	Tryptophan synthase beta chain OS	Rhodopseudomonas faecalis OX	0.1938	1.13984	3
tr|A0A318TBR7|A0A318TBR7_9BRAD	Succinate--CoA ligase [ADP-forming] subunit beta OS	Rhodopseudomonas faecalis OX	0.0234	1.14015	10
tr|A0A318TEV0|A0A318TEV0_9BRAD	UDP-2-acetamido-3-amino-2,3-dideoxy-glucuronate N-acetyltransferase OS	Rhodopseudomonas faecalis OX	0.17706	1.14015	2
tr|A0A318TC38|A0A318TC38_9BRAD	Anaerobic Mg-protoporphyrin IX monomethyl ester oxidative cyclase OS	Rhodopseudomonas faecalis OX	0.41825	1.14062	10
tr|A0A318TIC6|A0A318TIC6_9BRAD	Heptosyltransferase-2 OS	Rhodopseudomonas faecalis OX	0.13273	1.14077	2
tr|A0A318TDT4|A0A318TDT4_9BRAD	Cob(II)yrinic acid a,c-diamide reductase OS	Rhodopseudomonas faecalis OX	0.05572	1.14083	4
tr|A0A318TM04|A0A318TM04_9BRAD	Uncharacterized protein OS	Rhodopseudomonas faecalis OX	0.65016	1.14153	1
tr|A0A318TG88|A0A318TG88_9BRAD	Uncharacterized protein OS	Rhodopseudomonas faecalis OX	0.39584	1.14153	2
tr|A0A318TKF6|A0A318TKF6_9BRAD	Uncharacterized protein (TIGR02300 family) OS	Rhodopseudomonas faecalis OX	0.10012	1.1417	4
tr|A0A318TEI2|A0A318TEI2_9BRAD	Malonyl CoA-acyl carrier protein transacylase OS	Rhodopseudomonas faecalis OX	0.03251	1.14216	9
tr|R8X326|R8X326_9ENTR	Dihydrolipoyl dehydrogenase OS	Citrobacter sp. KTE151 OX	0.46949	1.14261	3
tr|A0A0N8VEF9|A0A0N8VEF9_RHOCA	Bacterioferritin OS	Rhodobacter capsulatus OX	0.77191	1.14323	5
tr|A0A318TL38|A0A318TL38_9BRAD	Beta-ketodecanoyl-[acyl-carrier-protein] synthase OS	Rhodopseudomonas faecalis OX	0.07158	1.14349	5
tr|A0A318TE74|A0A318TE74_9BRAD	3-octaprenyl-4-hydroxybenzoate decarboxylase OS	Rhodopseudomonas faecalis OX	0.1201	1.1436	7
tr|A0A4Y9IK35|A0A4Y9IK35_9BACT	Pyruvate kinase OS	Dysgonomonas mossii OX	0.33683	1.1437	3
tr|A0A318TD90|A0A318TD90_9BRAD	Uncharacterized protein OS	Rhodopseudomonas faecalis OX	0.22314	1.14446	3
tr|A0A318TAA9|A0A318TAA9_9BRAD	Pyrroline-5-carboxylate reductase OS	Rhodopseudomonas faecalis OX	0.11805	1.14456	3
tr|A0A318T9B7|A0A318T9B7_9BRAD	3-dehydroquinate synthase OS	Rhodopseudomonas faecalis OX	0.48663	1.14593	4
tr|A0A318T922|A0A318T922_9BRAD	Phospholipid/cholesterol/gamma-HCH transport system substrate-binding protein OS	Rhodopseudomonas faecalis OX	0.05713	1.1466	2
tr|A0A318TFF9|A0A318TFF9_9BRAD	Ribosomal large subunit pseudouridine synthase C OS	Rhodopseudomonas faecalis OX	0.01557	1.14685	7
tr|A0A318TIH5|A0A318TIH5_9BRAD	50S ribosomal protein L14 OS	Rhodopseudomonas faecalis OX	0.25517	1.14757	4
tr|A0A318TCR3|A0A318TCR3_9BRAD	50S ribosomal protein L6 OS	Rhodopseudomonas faecalis OX	0.03753	1.14822	7
tr|A0A318T7Z1|A0A318T7Z1_9BRAD	1-(5-phosphoribosyl)-5-[(5-phosphoribosylamino)methylideneamino] imidazole-4-carboxamide isomerase OS	Rhodopseudomonas faecalis OX	0.25207	1.14852	6
tr|A0A318TAP1|A0A318TAP1_9BRAD	Phosphoribosylformylglycinamidine synthase subunit PurL OS	Rhodopseudomonas faecalis OX	0.04656	1.14871	10
tr|A0A318TGY2|A0A318TGY2_9BRAD	Invasion protein IalB OS	Rhodopseudomonas faecalis OX	0.06778	1.14873	10
tr|A0A318T8H7|A0A318T8H7_9BRAD	UDP-N-acetylmuramate--L-alanine ligase OS	Rhodopseudomonas faecalis OX	0.0246	1.14965	5
tr|A0A0N1LUD0|A0A0N1LUD0_9BRAD	Acyl-CoA dehydrogenase OS	Rhodopseudomonas sp. AAP120 OX	0.31953	1.14991	2
tr|A0A318TDB9|A0A318TDB9_9BRAD	Uncharacterized protein OS	Rhodopseudomonas faecalis OX	0.42992	1.14992	6
tr|A0A318TL44|A0A318TL44_9BRAD	Integration host factor subunit alpha OS	Rhodopseudomonas faecalis OX	0.09902	1.15005	6
tr|A0A318TIL3|A0A318TIL3_9BRAD	FkbM family methyltransferase OS	Rhodopseudomonas faecalis OX	0.24421	1.15011	3
tr|A0A0E2PGZ2|A0A0E2PGZ2_RHOCA	Amino acid ABC transporter substrate-binding protein OS	Rhodobacter capsulatus Y262 OX	0.63996	1.15025	6
tr|A0A318TBQ0|A0A318TBQ0_9BRAD	Glutathione S-transferase OS	Rhodopseudomonas faecalis OX	0.36286	1.15076	2
RRRRRtr|A0A0D7F252|A0A0D7F252_RHOPL	REVERSED Cobalamin biosynthesis protein CobN OS	Rhodopseudomonas palustris OX	0.64382	1.15104	1
tr|A0A318THJ9|A0A318THJ9_9BRAD	50S ribosomal protein L9 OS	Rhodopseudomonas faecalis OX	0.0313	1.15153	7
tr|A0A318TD77|A0A318TD77_9BRAD	N5-carboxyaminoimidazole ribonucleotide mutase OS	Rhodopseudomonas faecalis OX	0.0811	1.15181	6
tr|A0A318T931|A0A318T931_9BRAD	Diaminopimelate decarboxylase OS	Rhodopseudomonas faecalis OX	0.20515	1.15192	1
tr|A0A318TE73|A0A318TE73_9BRAD	3-isopropylmalate dehydratase small subunit OS	Rhodopseudomonas faecalis OX	0.00834	1.15219	10
tr|A0A318TAY0|A0A318TAY0_9BRAD	Helix-hairpin-helix protein OS	Rhodopseudomonas faecalis OX	0.51846	1.15256	4
tr|R8WK77|R8WK77_9ENTR	ATP synthase gamma chain OS	Citrobacter sp. KTE151 OX	0.43121	1.15271	1
tr|A0A318T909|A0A318T909_9BRAD	50S ribosomal protein L2 OS	Rhodopseudomonas faecalis OX	0.094	1.15279	10
tr|F8WZL5|F8WZL5_9BACT	Superoxide dismutase OS	Dysgonomonas mossii DSM 22836 OX	0.51379	1.15284	1
tr|A0A318TCQ3|A0A318TCQ3_9BRAD	50S ribosomal protein L17 OS	Rhodopseudomonas faecalis OX	0.13241	1.15293	7
tr|A0A318TEM7|A0A318TEM7_9BRAD	Aspartate--tRNA(Asp/Asn) ligase OS	Rhodopseudomonas faecalis OX	0.05053	1.15307	10
tr|A0A318TGG0|A0A318TGG0_9BRAD	GTPase Era OS	Rhodopseudomonas faecalis OX	0.03591	1.15363	5
tr|A0A318TNV9|A0A318TNV9_9BRAD	Aspartate/methionine/tyrosine aminotransferase OS	Rhodopseudomonas faecalis OX	0.12942	1.15365	7
tr|A0A4U1K0T4|A0A4U1K0T4_RHOCA	Bifunctional enoyl-CoA hydratase/phosphate acetyltransferase OS	Rhodobacter capsulatus OX	0.56795	1.15421	2
tr|A0A318T827|A0A318T827_9BRAD	Long-chain acyl-CoA synthetase OS	Rhodopseudomonas faecalis OX	0.70654	1.1544	7
tr|A0A318TCP0|A0A318TCP0_9BRAD	ATPase subunit of ABC transporter with duplicated ATPase domains OS	Rhodopseudomonas faecalis OX	0.33139	1.15464	1
tr|A0A318TBX9|A0A318TBX9_9BRAD	Mannose-1-phosphate guanylyltransferase OS	Rhodopseudomonas faecalis OX	0.15974	1.15483	3
tr|A0A318TEI7|A0A318TEI7_9BRAD	Pantothenate synthetase OS	Rhodopseudomonas faecalis OX	0.09315	1.15498	2
tr|A0A2T4J8F6|A0A2T4J8F6_RHOBL	30S ribosomal protein S14 OS	Rhodobacter blasticus DSM 2131 OX	0.59266	1.15566	1
tr|A0A4U1JLV9|A0A4U1JLV9_RHOCA	Adenylosuccinate synthetase OS	Rhodobacter capsulatus OX	0.48669	1.15567	2
tr|A0A318TFT7|A0A318TFT7_9BRAD	Malate dehydrogenase (Oxaloacetate-decarboxylating)(NADP+) OS	Rhodopseudomonas faecalis OX	0.10333	1.1565	7
tr|F8WZA8|F8WZA8_9BACT	Uncharacterized protein OS	Dysgonomonas mossii DSM 22836 OX	0.51123	1.15651	1
tr|A0A318TTM6|A0A318TTM6_9BRAD	G3E family GTPase OS	Rhodopseudomonas faecalis OX	0.02041	1.15655	3
tr|A0A318TCJ0|A0A318TCJ0_9BRAD	Sulfate/thiosulfate import ATP-binding protein CysA OS	Rhodopseudomonas faecalis OX	0.32691	1.15673	8
sp|Q07KP3|RL17_RHOP5	50S ribosomal protein L17 OS	Rhodopseudomonas palustris (strain BisA53) OX	0.07633	1.15682	1
tr|A0A2T4J3X1|A0A2T4J3X1_RHOBL	Elongation factor Tu (Fragment) OS	Rhodobacter blasticus DSM 2131 OX	0.31739	1.15711	3
tr|A0A318TD04|A0A318TD04_9BRAD	GT2 family glycosyltransferase OS	Rhodopseudomonas faecalis OX	0.23279	1.15721	1
tr|A0A318TDG9|A0A318TDG9_9BRAD	Chorismate synthase OS	Rhodopseudomonas faecalis OX	0.36984	1.1574	2
tr|A0A318TEZ2|A0A318TEZ2_9BRAD	Microcin C transport system ATP-binding protein OS	Rhodopseudomonas faecalis OX	0.17036	1.15768	1
tr|R8WJ95|R8WJ95_9ENTR	UPF0337 protein YjbJ OS	Citrobacter sp. KTE151 OX	0.55618	1.15786	1
tr|A0A318TCP8|A0A318TCP8_9BRAD	50S ribosomal protein L25 OS	Rhodopseudomonas faecalis OX	0.08884	1.158	10
tr|A0A318TGG6|A0A318TGG6_9BRAD	Cobyric acid synthase OS	Rhodopseudomonas faecalis OX	0.05735	1.15811	9
tr|A0A318T8P0|A0A318T8P0_9BRAD	Aspartokinase OS	Rhodopseudomonas faecalis OX	0.0316	1.15964	10
tr|A0A318TAH9|A0A318TAH9_9BRAD	30S ribosomal protein S13 OS	Rhodopseudomonas faecalis OX	0.03548	1.15965	8
tr|Q6ND64|Q6ND64_RHOPA	Signal recognition particle protein OS	Rhodopseudomonas palustris (strain ATCC BAA-98 / CGA009) OX	0.24975	1.15966	2
tr|A0A318TJH8|A0A318TJH8_9BRAD	Adenylosuccinate lyase OS	Rhodopseudomonas faecalis OX	0.00713	1.1603	9
tr|A0A318TEF3|A0A318TEF3_9BRAD	Aspartate carbamoyltransferase OS	Rhodopseudomonas faecalis OX	0.13875	1.16056	6
sp|Q07R87|SYA_RHOP5	Alanine--tRNA ligase OS	Rhodopseudomonas palustris (strain BisA53) OX	0.09117	1.16082	1
tr|A0A318TL78|A0A318TL78_9BRAD	Dolichol-phosphate mannosyltransferase OS	Rhodopseudomonas faecalis OX	0.0792	1.16107	2
tr|A0A2R4GY90|A0A2R4GY90_RHOPL	Protein RecA OS	Rhodopseudomonas palustris OX	0.78399	1.16154	1
tr|A0A318TDC5|A0A318TDC5_9BRAD	Coenzyme F420 hydrogenase subunit beta OS	Rhodopseudomonas faecalis OX	0.15513	1.16182	6
tr|A0A323UC60|A0A323UC60_RHOPL	Glycine--tRNA ligase beta subunit OS	Rhodopseudomonas palustris OX	0.26069	1.16266	1
tr|A0A0E2PCS6|A0A0E2PCS6_RHOCA	Single-stranded DNA-binding protein OS	Rhodobacter capsulatus Y262 OX	0.81417	1.16305	2
tr|A0A1G7NVY2|A0A1G7NVY2_RHOCA	Porphobilinogen deaminase OS	Rhodobacter capsulatus OX	0.56504	1.16306	3
tr|A0A318TJR5|A0A318TJR5_9BRAD	Uncharacterized protein OS	Rhodopseudomonas faecalis OX	0.38983	1.16312	2
tr|A0A318T996|A0A318T996_9BRAD	2-methylcitrate dehydratase PrpD OS	Rhodopseudomonas faecalis OX	0.0522	1.16367	8
tr|A0A6L5EGH0|A0A6L5EGH0_9ENTR	YgiW/YdeI family stress tolerance OB fold protein OS	Citrobacter sp. NMI7905_11 OX	0.68782	1.16417	1
tr|D5ALY4|D5ALY4_RHOCB	50S ribosomal protein L10 OS	Rhodobacter capsulatus (strain ATCC BAA-309 / NBRC 16581 / SB1003) OX	0.48271	1.16501	2
tr|A0A318T898|A0A318T898_9BRAD	Uncharacterized protein OS	Rhodopseudomonas faecalis OX	0.48845	1.16531	1
tr|A0A318TKQ5|A0A318TKQ5_9BRAD	Uncharacterized protein OS	Rhodopseudomonas faecalis OX	0.09963	1.16566	2
tr|A0A318TBA7|A0A318TBA7_9BRAD	Uncharacterized protein OS	Rhodopseudomonas faecalis OX	0.29353	1.16567	1
tr|A0A318TEV8|A0A318TEV8_9BRAD	16S rRNA (Cytosine967-C5)-methyltransferase OS	Rhodopseudomonas faecalis OX	0.05488	1.1658	6
tr|A0A318TL49|A0A318TL49_9BRAD	3-oxoacid CoA-transferase subunit B OS	Rhodopseudomonas faecalis OX	0.29898	1.16586	2
tr|A0A1G7MBA4|A0A1G7MBA4_RHOCA	3-oxoacyl-[acyl-carrier-protein] synthase-1 OS	Rhodobacter capsulatus OX	0.34371	1.16595	1
tr|A0A318TAL5|A0A318TAL5_9BRAD	Uncharacterized protein OS	Rhodopseudomonas faecalis OX	0.08471	1.16617	10
tr|D5ALF8|D5ALF8_RHOCB	DNA-binding protein HU-1 OS	Rhodobacter capsulatus (strain ATCC BAA-309 / NBRC 16581 / SB1003) OX	0.57698	1.16623	1
tr|A0A4Y9IN52|A0A4Y9IN52_9BACT	SusC/RagA family TonB-linked outer membrane protein OS	Dysgonomonas mossii OX	0.3905	1.16657	1
tr|A0A318TJR8|A0A318TJR8_9BRAD	Malate dehydrogenase OS	Rhodopseudomonas faecalis OX	0.05132	1.16688	10
tr|A0A318TBT6|A0A318TBT6_9BRAD	RNA pyrophosphohydrolase OS	Rhodopseudomonas faecalis OX	0.19356	1.16714	2
tr|A0A318T9R7|A0A318T9R7_9BRAD	Sugar/nucleoside kinase (Ribokinase family) OS	Rhodopseudomonas faecalis OX	0.06915	1.1676	7
tr|A0A318TL71|A0A318TL71_9BRAD	IclR family transcriptional regulator OS	Rhodopseudomonas faecalis OX	0.048	1.16777	5
tr|A0A2T4J891|A0A2T4J891_RHOBL	Cysteine desulfurase OS	Rhodobacter blasticus DSM 2131 OX	0.45471	1.16781	1
tr|A0A6G8UM61|A0A6G8UM61_9ENTR	Iron-containing alcohol dehydrogenase OS	Citrobacter sp. Y3 OX	0.19143	1.16781	3
tr|A0A318TCL3|A0A318TCL3_9BRAD	dTDP-4-amino-4,6-dideoxygalactose transaminase OS	Rhodopseudomonas faecalis OX	0.06364	1.1693	8
tr|A0A182D5C7|A0A182D5C7_BLAVI	Enoyl-[acyl-carrier-protein] reductase [NADH] OS	Blastochloris viridis OX	0.22498	1.16949	1
tr|A0A318TI67|A0A318TI67_9BRAD	Nitronate monooxygenase OS	Rhodopseudomonas faecalis OX	0.29919	1.16959	1
tr|A0A318TGI2|A0A318TGI2_9BRAD	Riboflavin biosynthesis protein OS	Rhodopseudomonas faecalis OX	0.05955	1.16967	4
tr|A0A318T8A3|A0A318T8A3_9BRAD	Prephenate dehydrogenase OS	Rhodopseudomonas faecalis OX	0.37461	1.1697	3
tr|A0A6N2SQ68|A0A6N2SQ68_CITAM	Acetyl-CoA acetyltransferase OS	Citrobacter amalonaticus OX	0.51053	1.1702	2
tr|A0A318TFX4|A0A318TFX4_9BRAD	23S rRNA m(5)U-1939 methyltransferase OS	Rhodopseudomonas faecalis OX	0.29904	1.17037	1
tr|A0A6N2VYK6|A0A6N2VYK6_CITAM	2-oxoglutarate dehydrogenase E1 component OS	Citrobacter amalonaticus OX	0.33386	1.17105	2
tr|A0A318T9V5|A0A318T9V5_9BRAD	Microcin C transport system substrate-binding protein OS	Rhodopseudomonas faecalis OX	0.07476	1.17126	3
tr|A0A318TJ03|A0A318TJ03_9BRAD	Transcription antitermination protein NusB OS	Rhodopseudomonas faecalis OX	0.07057	1.17129	2
tr|A0A318TI96|A0A318TI96_9BRAD	Light-independent protochlorophyllide reductase iron-sulfur ATP-binding protein OS	Rhodopseudomonas faecalis OX	0.28929	1.17134	8
tr|A0A318TJT9|A0A318TJT9_9BRAD	50S ribosomal protein L19 OS	Rhodopseudomonas faecalis OX	0.04027	1.17144	9
RRRRRtr|A0A182CXH9|A0A182CXH9_BLAVI	REVERSED Protein RecA OS	Blastochloris viridis OX	0.23403	1.1716	1
tr|A0A318TFP4|A0A318TFP4_9BRAD	Uncharacterized protein OS	Rhodopseudomonas faecalis OX	0.33223	1.17223	1
tr|A0A6L5EAH8|A0A6L5EAH8_9ENTR	50S ribosomal protein L6 OS	Citrobacter sp. NMI7905_11 OX	0.34362	1.17254	1
tr|A0A318T9R5|A0A318T9R5_9BRAD	Transaldolase OS	Rhodopseudomonas faecalis OX	0.01372	1.17256	10
tr|A0A318TCF4|A0A318TCF4_9BRAD	50S ribosomal protein L32 OS	Rhodopseudomonas faecalis OX	0.07012	1.17275	2
tr|D2TTZ2|D2TTZ2_CITRI	Autoinducer 2-binding protein LsrB OS	Citrobacter rodentium (strain ICC168) OX	0.43023	1.17347	2
tr|A0A318U3I7|A0A318U3I7_9RHOB	Glyceraldehyde-3-phosphate dehydrogenase OS	Rhodobacter viridis OX	0.56173	1.17391	3
tr|A0A318TA67|A0A318TA67_9BRAD	Uncharacterized protein OS	Rhodopseudomonas faecalis OX	0.6094	1.17401	7
tr|A0A318TFU3|A0A318TFU3_9BRAD	K(+)-insensitive pyrophosphate-energized proton pump OS	Rhodopseudomonas faecalis OX	0.3343	1.17443	4
tr|A0A6N2VWE2|A0A6N2VWE2_CITAM	Dihydrolipoyllysine-residue succinyltransferase component of 2-oxoglutarate dehydrogenase complex OS	Citrobacter amalonaticus OX	0.37877	1.17465	3
tr|A0A318TM06|A0A318TM06_9BRAD	Enolase OS	Rhodopseudomonas faecalis OX	0.04615	1.17465	8
tr|Q6N690|Q6N690_RHOPA	Riboflavin synthase alpha chain OS	Rhodopseudomonas palustris (strain ATCC BAA-98 / CGA009) OX	0.23655	1.1747	1
tr|A0A1G7EMA0|A0A1G7EMA0_RHOCA	Peptide/nickel transport system substrate-binding protein OS	Rhodobacter capsulatus OX	0.52837	1.17545	1
tr|A0A318TBW6|A0A318TBW6_9BRAD	3-oxoadipyl-CoA thiolase OS	Rhodopseudomonas faecalis OX	0.66638	1.17564	1
tr|A0A318TTB8|A0A318TTB8_9BRAD	RND family efflux transporter MFP subunit OS	Rhodopseudomonas faecalis OX	0.01816	1.17574	5
tr|A0A318TA93|A0A318TA93_9BRAD	50S ribosomal protein L4 OS	Rhodopseudomonas faecalis OX	0.01324	1.176	7
tr|D5AKG8|D5AKG8_RHOCB	Photosynthetic apparatus regulatory protein RegA-1 OS	Rhodobacter capsulatus (strain ATCC BAA-309 / NBRC 16581 / SB1003) OX	0.32916	1.17644	2
tr|A0A0Q0R2C1|A0A0Q0R2C1_RHOCA	Uncharacterized protein OS	Rhodobacter capsulatus OX	0.47029	1.17683	2
tr|A0A4Y9IPM0|A0A4Y9IPM0_9BACT	Phosphoglycerate kinase OS	Dysgonomonas mossii OX	0.45354	1.17716	1
tr|A0A318T6H3|A0A318T6H3_9BRAD	Imidazole glycerol phosphate synthase subunit HisF OS	Rhodopseudomonas faecalis OX	0.1614	1.1772	3
tr|A0A0Q0ZX36|A0A0Q0ZX36_RHOCA	Phasin protein OS	Rhodobacter capsulatus OX	0.86031	1.17774	6
tr|A0A0N8VG28|A0A0N8VG28_RHOCA	Biotin carboxylase OS	Rhodobacter capsulatus OX	0.76748	1.17776	1
tr|A0A318TKA6|A0A318TKA6_9BRAD	DUF2059 domain-containing protein OS	Rhodopseudomonas faecalis OX	0.07928	1.17778	8
tr|A0A2T4JDR6|A0A2T4JDR6_RHOBL	PepSY domain-containing protein OS	Rhodobacter blasticus DSM 2131 OX	0.63897	1.17807	1
tr|A0A318T832|A0A318T832_9BRAD	Adenylyltransferase/sulfurtransferase OS	Rhodopseudomonas faecalis OX	0.37347	1.17861	1
tr|A0A318TKZ0|A0A318TKZ0_9BRAD	ATP-dependent Clp protease ATP-binding subunit ClpX OS	Rhodopseudomonas faecalis OX	0.05996	1.17869	6
tr|A0A318TEY1|A0A318TEY1_9BRAD	Elongation factor P OS	Rhodopseudomonas faecalis OX	0.09628	1.1787	7
tr|A0A318TN76|A0A318TN76_9BRAD	PTS system mannose-specific IIA component OS	Rhodopseudomonas faecalis OX	0.29531	1.1798	3
tr|A0A318T7Y0|A0A318T7Y0_9BRAD	Thiamine-phosphate synthase OS	Rhodopseudomonas faecalis OX	0.13953	1.18053	4
tr|A0A318TBR4|A0A318TBR4_9BRAD	Dephospho-CoA kinase OS	Rhodopseudomonas faecalis OX	0.37792	1.18136	1
sp|Q07UH1|TRPB_RHOP5	Tryptophan synthase beta chain OS	Rhodopseudomonas palustris (strain BisA53) OX	0.39277	1.18151	1
tr|F8WVT1|F8WVT1_9BACT	50S ribosomal protein L16 OS	Dysgonomonas mossii DSM 22836 OX	0.36998	1.18192	2
tr|A0A318TA59|A0A318TA59_9BRAD	Ferredoxin--NADP reductase OS	Rhodopseudomonas faecalis OX	0.17631	1.18197	6
tr|D2TKN8|D2TKN8_CITRI	Universal stress protein OS	Citrobacter rodentium (strain ICC168) OX	0.29203	1.18198	3
tr|A0A318T944|A0A318T944_9BRAD	Putative dehydrogenase OS	Rhodopseudomonas faecalis OX	0.29585	1.18228	6
tr|A0A318TGF7|A0A318TGF7_9BRAD	Bifunctional protein GlmU OS	Rhodopseudomonas faecalis OX	0.05121	1.18249	9
tr|A0A318T8J8|A0A318T8J8_9BRAD	Uncharacterized protein DUF4403 OS	Rhodopseudomonas faecalis OX	0.43882	1.18267	1
tr|D5APG0|D5APG0_RHOCB	Hydrogenase, small subunit OS	Rhodobacter capsulatus (strain ATCC BAA-309 / NBRC 16581 / SB1003) OX	0.50209	1.18307	1
tr|A0A318T7X2|A0A318T7X2_9BRAD	Protein-glutamate methylesterase/protein-glutamine glutaminase OS	Rhodopseudomonas faecalis OX	0.18107	1.18401	7
tr|A0A318TPD6|A0A318TPD6_9BRAD	Xre family transcriptional regulator OS	Rhodopseudomonas faecalis OX	0.00597	1.18409	6
tr|A0A318TRN0|A0A318TRN0_9BRAD	Phage repressor protein C with HTH and peptisase S24 domain OS	Rhodopseudomonas faecalis OX	0.17425	1.18488	6
tr|F8WZS0|F8WZS0_9BACT	Transcriptional regulatory protein rprY OS	Dysgonomonas mossii DSM 22836 OX	0.32843	1.18499	5
tr|A0A2T4JAL9|A0A2T4JAL9_RHOBL	Nitrogen regulation protein NR(I) OS	Rhodobacter blasticus DSM 2131 OX	0.29727	1.18602	1
tr|A0A318TA51|A0A318TA51_9BRAD	YlxR domain-containing protein OS	Rhodopseudomonas faecalis OX	0.48949	1.18624	1
tr|A0A318TC63|A0A318TC63_9BRAD	Glutamate 5-kinase OS	Rhodopseudomonas faecalis OX	0.00691	1.18638	5
tr|A0A318TPZ9|A0A318TPZ9_9BRAD	UDP-N-acetyl-2-amino-2-deoxyglucuronate dehydrogenase OS	Rhodopseudomonas faecalis OX	0.08146	1.18668	5
tr|A0A318TKG6|A0A318TKG6_9BRAD	Phosphotransferase IIA-like nitrogen-regulatory protein PtsN OS	Rhodopseudomonas faecalis OX	0.12615	1.18686	6
tr|A0A318TEW4|A0A318TEW4_9BRAD	Maltose alpha-D-glucosyltransferase OS	Rhodopseudomonas faecalis OX	0.36267	1.18699	9
tr|A0A318TF95|A0A318TF95_9BRAD	Phosphoribulokinase OS	Rhodopseudomonas faecalis OX	0.37963	1.18702	1
tr|A0A2T4JB22|A0A2T4JB22_RHOBL	50S ribosomal protein L9 OS	Rhodobacter blasticus DSM 2131 OX	0.47256	1.18715	1
tr|A0A318U0B4|A0A318U0B4_9BRAD	Threonine--tRNA ligase OS	Rhodopseudomonas faecalis OX	0.03642	1.1872	9
tr|A0A318TMI2|A0A318TMI2_9BRAD	Phospho-2-dehydro-3-deoxyheptonate aldolase OS	Rhodopseudomonas faecalis OX	0.32437	1.18764	3
tr|A0A318TPH9|A0A318TPH9_9BRAD	Serine hydroxymethyltransferase OS	Rhodopseudomonas faecalis OX	0.11222	1.188	8
tr|A0A318TNE2|A0A318TNE2_9BRAD	3-oxoacyl-[acyl-carrier-protein] synthase 2 OS	Rhodopseudomonas faecalis OX	0.04736	1.1884	9
tr|A0A318TFW3|A0A318TFW3_9BRAD	Superfamily II DNA/RNA helicase OS	Rhodopseudomonas faecalis OX	0.24583	1.1892	5
tr|A0A318THV6|A0A318THV6_9BRAD	30S ribosomal protein S6 OS	Rhodopseudomonas faecalis OX	0.03815	1.18995	10
tr|A0A318TFR4|A0A318TFR4_9BRAD	Periplasmic chaperone for outer membrane proteins SurA OS	Rhodopseudomonas faecalis OX	0.15569	1.19057	3
tr|A0A0H5BHY7|A0A0H5BHY7_BLAVI	Nitrogenase molybdenum-iron protein alpha chain OS	Blastochloris viridis OX	0.62423	1.19074	1
tr|A0A318TGS9|A0A318TGS9_9BRAD	N-acetyltransferase domain-containing protein OS	Rhodopseudomonas faecalis OX	0.07203	1.19133	1
tr|A0A318TMQ0|A0A318TMQ0_9BRAD	Hydrogenobyrinate a,c-diamide synthase OS	Rhodopseudomonas faecalis OX	0.16	1.19135	4
tr|A0A1G7GIX4|A0A1G7GIX4_RHOCA	Peptide/nickel transport system substrate-binding protein OS	Rhodobacter capsulatus OX	0.66489	1.19143	4
tr|A0A318T7X0|A0A318T7X0_9BRAD	Glycine cleavage system T protein OS	Rhodopseudomonas faecalis OX	0.18676	1.19168	3
tr|A0A4U1JR26|A0A4U1JR26_RHOCA	NAD(P) transhydrogenase subunit alpha OS	Rhodobacter capsulatus OX	0.36896	1.19215	2
tr|A0A318T733|A0A318T733_9BRAD	Lipoprotein-anchoring transpeptidase ErfK/SrfK OS	Rhodopseudomonas faecalis OX	0.06459	1.19224	4
tr|A0A318TM22|A0A318TM22_9BRAD	Octaprenyl-diphosphate synthase OS	Rhodopseudomonas faecalis OX	0.16071	1.19245	5
tr|A0A318TCY3|A0A318TCY3_9BRAD	Cyclic nucleotide-binding domain-containing protein OS	Rhodopseudomonas faecalis OX	0.05247	1.19263	2
tr|A0A318TSJ7|A0A318TSJ7_9BRAD	3-phenylpropionate/trans-cinnamate dioxygenase ferredoxin reductase subunit OS	Rhodopseudomonas faecalis OX	0.05547	1.19269	10
tr|A0A318TEN3|A0A318TEN3_9BRAD	GTPase Der OS	Rhodopseudomonas faecalis OX	0.51049	1.19281	5
tr|A0A1Q9QMC7|A0A1Q9QMC7_RHOSU	Phosphoribosylformylglycinamidine cyclo-ligase OS	Rhodovulum sulfidophilum OX	0.3264	1.19298	1
tr|A0A4U1JU30|A0A4U1JU30_RHOCA	ABC transporter substrate-binding protein OS	Rhodobacter capsulatus OX	0.65493	1.19332	1
tr|Q6N7B3|Q6N7B3_RHOPA	Uncharacterized protein OS	Rhodopseudomonas palustris (strain ATCC BAA-98 / CGA009) OX	0.71736	1.19334	2
tr|A0A318TLV9|A0A318TLV9_9BRAD	Lipoprotein-releasing system permease protein OS	Rhodopseudomonas faecalis OX	0.14809	1.19362	1
tr|A0A318TJI0|A0A318TJI0_9BRAD	Farnesyl-diphosphate farnesyltransferase OS	Rhodopseudomonas faecalis OX	0.0858	1.19413	3
tr|A0A318TE93|A0A318TE93_9BRAD	Uncharacterized protein DUF4167 OS	Rhodopseudomonas faecalis OX	0.25107	1.19453	5
tr|A0A318T8R0|A0A318T8R0_9BRAD	Succinate dehydrogenase iron-sulfur subunit OS	Rhodopseudomonas faecalis OX	0.0031	1.1947	8
tr|A0A318TC81|A0A318TC81_9BRAD	Ribosome maturation factor RimM OS	Rhodopseudomonas faecalis OX	0.06642	1.19482	2
tr|A0A318TIP1|A0A318TIP1_9BRAD	Glutamine--fructose-6-phosphate transaminase (isomerizing) OS	Rhodopseudomonas faecalis OX	0.3389	1.19508	1
tr|D5AM70|D5AM70_RHOCB	Glucans biosynthesis protein G-1 OS	Rhodobacter capsulatus (strain ATCC BAA-309 / NBRC 16581 / SB1003) OX	0.64982	1.19539	1
tr|A0A318TE26|A0A318TE26_9BRAD	Phenylalanine--tRNA ligase alpha subunit OS	Rhodopseudomonas faecalis OX	0.18376	1.19545	6
tr|A0A6L5E2A5|A0A6L5E2A5_9ENTR	ADP-forming succinate--CoA ligase subunit beta OS	Citrobacter sp. NMI7905_11 OX	0.34079	1.19572	1
tr|A0A318THF6|A0A318THF6_9BRAD	Enamine deaminase RidA (YjgF/YER057c/UK114 family) OS	Rhodopseudomonas faecalis OX	0.3101	1.19586	7
tr|A0A318THF9|A0A318THF9_9BRAD	HlyD family secretion protein OS	Rhodopseudomonas faecalis OX	0.48693	1.19626	2
tr|A0A318TB82|A0A318TB82_9BRAD	Thiosulfate-binding protein SoxY OS	Rhodopseudomonas faecalis OX	0.3978	1.19675	2
tr|E6VDK7|E6VDK7_RHOPX	30S ribosomal protein S18 OS	Rhodopseudomonas palustris (strain DX-1) OX	0.11301	1.19699	3
tr|A0A318TKB8|A0A318TKB8_9BRAD	Serine acetyltransferase OS	Rhodopseudomonas faecalis OX	0.04445	1.19712	4
tr|A0A318THV9|A0A318THV9_9BRAD	50S ribosomal protein L27 OS	Rhodopseudomonas faecalis OX	0.05619	1.19775	1
tr|A0A318TDG1|A0A318TDG1_9BRAD	Reaction center protein M chain OS	Rhodopseudomonas faecalis OX	0.2096	1.19781	2
tr|A0A318TPU3|A0A318TPU3_9BRAD	50S ribosomal protein L1 OS	Rhodopseudomonas faecalis OX	0.02025	1.19805	9
tr|A0A318T8L9|A0A318T8L9_9BRAD	Bifunctional purine biosynthesis protein PurH OS	Rhodopseudomonas faecalis OX	0.0321	1.19839	9
tr|A0A318TUI1|A0A318TUI1_9BRAD	GTP-binding protein TypA/BipA OS	Rhodopseudomonas faecalis OX	0.20773	1.19913	10
tr|A0A318THV3|A0A318THV3_9BRAD	Uncharacterized protein OS	Rhodopseudomonas faecalis OX	0.07119	1.19919	4
tr|A0A318TI68|A0A318TI68_9BRAD	Lysine--tRNA ligase OS	Rhodopseudomonas faecalis OX	0.01903	1.20024	7
sp|Q20Y76|APT_RHOPB	Adenine phosphoribosyltransferase OS	Rhodopseudomonas palustris (strain BisB18) OX	0.44681	1.20047	1
tr|A0A0Q0UUU3|A0A0Q0UUU3_RHOCA	Thioredoxin peroxidase OS	Rhodobacter capsulatus OX	0.50166	1.20073	1
tr|A0A318TMM2|A0A318TMM2_9BRAD	Energy-dependent translational throttle protein EttA OS	Rhodopseudomonas faecalis OX	0.00659	1.20106	10
tr|A0A318TH80|A0A318TH80_9BRAD	Uncharacterized protein OS	Rhodopseudomonas faecalis OX	0.26784	1.20135	1
tr|A0A318TV22|A0A318TV22_9BRAD	Uncharacterized protein OS	Rhodopseudomonas faecalis OX	0.28353	1.20269	3
tr|A0A318TGU3|A0A318TGU3_9BRAD	Glycine--tRNA ligase alpha subunit OS	Rhodopseudomonas faecalis OX	0.04747	1.2033	6
tr|A0A318TD48|A0A318TD48_9BRAD	1-deoxy-D-xylulose-5-phosphate synthase OS	Rhodopseudomonas faecalis OX	0.16427	1.20342	10
tr|A0A318TGW5|A0A318TGW5_9BRAD	Outer membrane immunogenic protein OS	Rhodopseudomonas faecalis OX	0.33293	1.20342	1
tr|A0A318TDD5|A0A318TDD5_9BRAD	Peptidyl-prolyl cis-trans isomerase OS	Rhodopseudomonas faecalis OX	0.05995	1.20381	7
tr|A0A318TAL2|A0A318TAL2_9BRAD	Phosphoribosylformylglycinamidine synthase subunit PurQ OS	Rhodopseudomonas faecalis OX	0.01077	1.20396	7
tr|A0A318TA54|A0A318TA54_9BRAD	4-hydroxy-3-methylbut-2-enyl diphosphate reductase OS	Rhodopseudomonas faecalis OX	0.33492	1.2052	6
tr|A0A318TGM0|A0A318TGM0_9BRAD	3-methylfumaryl-CoA hydratase OS	Rhodopseudomonas faecalis OX	0.02273	1.20523	2
tr|A0A318TR46|A0A318TR46_9BRAD	CTP synthase OS	Rhodopseudomonas faecalis OX	0.06261	1.20539	6
tr|A0A318TDB6|A0A318TDB6_9BRAD	LuxR family two component transcriptional regulator OS	Rhodopseudomonas faecalis OX	0.41689	1.20743	4
tr|A0A318TAN2|A0A318TAN2_9BRAD	Glycine oxidase OS	Rhodopseudomonas faecalis OX	0.21719	1.20748	4
tr|A0A4U6MA89|A0A4U6MA89_9ENTR	30S ribosomal protein S3 OS	Citrobacter sp. TBCS-14 OX	0.21218	1.20826	5
tr|R8WPF8|R8WPF8_9ENTR	Uridine phosphorylase OS	Citrobacter sp. KTE151 OX	0.20699	1.20934	1
tr|A0A318TTD9|A0A318TTD9_9BRAD	L,D-transpeptidase-like protein OS	Rhodopseudomonas faecalis OX	0.07677	1.20971	2
tr|A0A318TU11|A0A318TU11_9BRAD	Phosphoribosyl-AMP cyclohydrolase OS	Rhodopseudomonas faecalis OX	0.02446	1.21087	3
tr|R8WRM4|R8WRM4_9ENTR	50S ribosomal protein L19 OS	Citrobacter sp. KTE151 OX	0.27898	1.21243	1
tr|A0A318T778|A0A318T778_9BRAD	Homoserine O-acetyltransferase OS	Rhodopseudomonas faecalis OX	0.11183	1.21478	5
tr|A0A318TUG1|A0A318TUG1_9BRAD	Propionyl-CoA carboxylase carboxyltransferase subunit OS	Rhodopseudomonas faecalis OX	0.05684	1.2148	7
tr|A0A318TIG4|A0A318TIG4_9BRAD	Glutamate dehydrogenase OS	Rhodopseudomonas faecalis OX	0.05323	1.21531	10
tr|A0A318TGR8|A0A318TGR8_9BRAD	Quinolinate synthase A OS	Rhodopseudomonas faecalis OX	0.19985	1.21552	2
tr|V7EFX9|V7EFX9_9RHOB	Acyl carrier protein OS	Rhodobacter sp. CACIA14H1 OX	0.75811	1.21559	1
tr|A0A318TM98|A0A318TM98_9BRAD	Outer membrane immunogenic protein OS	Rhodopseudomonas faecalis OX	0.03476	1.21591	2
tr|A0A318TKR8|A0A318TKR8_9BRAD	Porin OS	Rhodopseudomonas faecalis OX	0.08342	1.21674	6
tr|A0A318TAF7|A0A318TAF7_9BRAD	Ribose-phosphate pyrophosphokinase OS	Rhodopseudomonas faecalis OX	0.16647	1.21726	8
tr|A0A318TIH6|A0A318TIH6_9BRAD	Iron complex transport system substrate-binding protein OS	Rhodopseudomonas faecalis OX	0.17781	1.21848	1
tr|A0A318TGI7|A0A318TGI7_9BRAD	Probable transcriptional regulatory protein BJ122_10998 OS	Rhodopseudomonas faecalis OX	0.02061	1.21885	6
tr|A0A318TKY2|A0A318TKY2_9BRAD	Ribose-5-phosphate isomerase A OS	Rhodopseudomonas faecalis OX	0.18693	1.21904	2
tr|A0A318U0N5|A0A318U0N5_9BRAD	3-hydroxyacyl-[acyl-carrier-protein] dehydratase FabZ OS	Rhodopseudomonas faecalis OX	0.15539	1.21919	7
tr|A0A6N6K5A3|A0A6N6K5A3_9ENTR	Purine nucleoside phosphoramidase OS	Citrobacter pasteurii OX	0.24196	1.21934	1
tr|A0A0Q0QNB7|A0A0Q0QNB7_RHOCA	Spermidine/putrescine transport system substrate-binding protein OS	Rhodobacter capsulatus OX	0.48621	1.21937	10
tr|A0A0Q0R2D6|A0A0Q0R2D6_RHOCA	60 kDa chaperonin OS	Rhodobacter capsulatus OX	0.36381	1.21947	7
tr|A0A4Y9IQI2|A0A4Y9IQI2_9BACT	Glutamine synthetase type III OS	Dysgonomonas mossii OX	0.27089	1.21956	4
tr|A0A318TMI5|A0A318TMI5_9BRAD	Long-chain acyl-CoA synthetase OS	Rhodopseudomonas faecalis OX	0.42435	1.21967	1
tr|A0A318TBC4|A0A318TBC4_9BRAD	Thioredoxin OS	Rhodopseudomonas faecalis OX	0.1645	1.22041	2
tr|A0A318TAM3|A0A318TAM3_9BRAD	Uncharacterized protein OS	Rhodopseudomonas faecalis OX	0.21708	1.22107	3
tr|A0A318TCQ0|A0A318TCQ0_9BRAD	S1 motif domain-containing protein OS	Rhodopseudomonas faecalis OX	0.0604	1.22125	5
tr|A0A318TIS1|A0A318TIS1_9BRAD	50S ribosomal protein L31 OS	Rhodopseudomonas faecalis OX	0.03389	1.22144	6
tr|A0A418VM34|A0A418VM34_RHOPL	Argininosuccinate synthase OS	Rhodopseudomonas palustris OX	0.11403	1.22194	2
tr|A0A318TGH0|A0A318TGH0_9BRAD	Acyl-CoA thioesterase FadM OS	Rhodopseudomonas faecalis OX	0.0107	1.22198	3
tr|F8WZC6|F8WZC6_9BACT	Methylmalonyl-CoA epimerase OS	Dysgonomonas mossii DSM 22836 OX	0.38491	1.22206	1
tr|A0A318T811|A0A318T811_9BRAD	Alanine--tRNA ligase OS	Rhodopseudomonas faecalis OX	0.04476	1.22222	10
tr|A0A318T900|A0A318T900_9BRAD	Ornithine carbamoyltransferase OS	Rhodopseudomonas faecalis OX	0.04042	1.22245	9
tr|A0A318TVT3|A0A318TVT3_9BRAD	DNA topoisomerase 4 subunit A OS	Rhodopseudomonas faecalis OX	0.0188	1.22284	1
tr|A0A1G7PSL9|A0A1G7PSL9_RHOCA	Hydrogenase large subunit OS	Rhodobacter capsulatus OX	0.50792	1.22295	7
tr|A0A318TJ86|A0A318TJ86_9BRAD	Membrane fusion protein (Multidrug efflux system) OS	Rhodopseudomonas faecalis OX	0.06489	1.22312	1
tr|A0A318T8T4|A0A318T8T4_9BRAD	Ribosomal-protein-alanine N-acetyltransferase OS	Rhodopseudomonas faecalis OX	0.42097	1.22313	2
tr|A0A318TJL3|A0A318TJL3_9BRAD	Methylmalonyl-CoA mutase /heterodimeric methylmalonyl-CoA mutase large subunit OS	Rhodopseudomonas faecalis OX	0.10959	1.22333	10
tr|A0A318THC7|A0A318THC7_9BRAD	Alkylphosphonate utilization operon protein PhnA OS	Rhodopseudomonas faecalis OX	0.06411	1.22351	3
tr|A0A6M1TTZ3|A0A6M1TTZ3_9RHOB	Electron transfer flavoprotein-ubiquinone oxidoreductase OS	Rhodobacter sp. HX-7-19 OX	0.23332	1.2238	1
tr|A0A318TPR3|A0A318TPR3_9BRAD	50S ribosomal protein L18 OS	Rhodopseudomonas faecalis OX	0.12749	1.22398	4
tr|A0A2T4J8F4|A0A2T4J8F4_RHOBL	30S ribosomal protein S19 OS	Rhodobacter blasticus DSM 2131 OX	0.51748	1.22447	1
tr|F8X0H1|F8X0H1_9BACT	30S ribosomal protein S2 OS	Dysgonomonas mossii DSM 22836 OX	0.39039	1.22451	2
tr|A0A6N8DNT1|A0A6N8DNT1_RHOAC	GTPase ObgE OS	Rhodoblastus acidophilus OX	0.04284	1.22496	1
tr|A0A318TCP3|A0A318TCP3_9BRAD	Branched-chain-amino-acid aminotransferase OS	Rhodopseudomonas faecalis OX	0.03065	1.22506	10
tr|A0A318TQN9|A0A318TQN9_9BRAD	Uncharacterized protein OS	Rhodopseudomonas faecalis OX	0.35125	1.22593	1
tr|A0A0Q0QTT0|A0A0Q0QTT0_RHOCA	Spheroidene monooxygenase OS	Rhodobacter capsulatus OX	0.13326	1.22595	4
tr|A0A6G8UJ30|A0A6G8UJ30_9ENTR	Universal stress protein UspG OS	Citrobacter sp. Y3 OX	0.11708	1.22648	1
tr|A0A318TLB3|A0A318TLB3_9BRAD	Trigger factor OS	Rhodopseudomonas faecalis OX	0.04732	1.22653	10
tr|F8WVT9|F8WVT9_9BACT	50S ribosomal protein L6 OS	Dysgonomonas mossii DSM 22836 OX	0.4301	1.22656	1
tr|A0A318T745|A0A318T745_9BRAD	Uncharacterized protein OS	Rhodopseudomonas faecalis OX	0.08966	1.22658	3
tr|A0A4Y9ISK3|A0A4Y9ISK3_9BACT	60 kDa chaperonin OS	Dysgonomonas mossii OX	0.41974	1.22676	5
tr|A0A318TGZ3|A0A318TGZ3_9BRAD	UDP-N-acetylglucosamine 1-carboxyvinyltransferase OS	Rhodopseudomonas faecalis OX	0.16027	1.22695	7
tr|F8WY86|F8WY86_9BACT	Glyceraldehyde-3-phosphate dehydrogenase OS	Dysgonomonas mossii DSM 22836 OX	0.2911	1.22747	4
tr|A0A1G7LTD9|A0A1G7LTD9_RHOCA	Diadenosine tetraphosphate (Ap4A) hydrolase OS	Rhodobacter capsulatus OX	0.60489	1.22761	1
tr|D2TMI7|D2TMI7_CITRI	30S ribosomal protein S19 OS	Citrobacter rodentium (strain ICC168) OX	0.18506	1.2282	1
tr|A0A318TJ36|A0A318TJ36_9BRAD	HAD superfamily hydrolase (TIGR01459 family) OS	Rhodopseudomonas faecalis OX	0.01046	1.22826	3
tr|A0A318TJM8|A0A318TJM8_9BRAD	Putative pyrophosphorylase ModD OS	Rhodopseudomonas faecalis OX	0.07899	1.22842	3
tr|A0A318TJV9|A0A318TJV9_9BRAD	Tetratricopeptide repeat protein OS	Rhodopseudomonas faecalis OX	0.04035	1.22853	10
tr|A0A318T6I4|A0A318T6I4_9BRAD	Orotate phosphoribosyltransferase OS	Rhodopseudomonas faecalis OX	0.3075	1.22945	3
tr|D5ALB7|D5ALB7_RHOCB	Argininosuccinate synthase OS	Rhodobacter capsulatus (strain ATCC BAA-309 / NBRC 16581 / SB1003) OX	0.39443	1.23015	3
tr|D5AN48|D5AN48_RHOCB	ATP-dependent Clp protease ATP-binding subunit ClpX OS	Rhodobacter capsulatus (strain ATCC BAA-309 / NBRC 16581 / SB1003) OX	0.43171	1.23027	2
tr|A0A318TJ74|A0A318TJ74_9BRAD	Phosphoenolpyruvate carboxykinase (ATP) OS	Rhodopseudomonas faecalis OX	0.13288	1.2306	10
tr|F8X4F9|F8X4F9_9BACT	Chaperone protein DnaK OS	Dysgonomonas mossii DSM 22836 OX	0.38538	1.23084	1
tr|A0A318T8F7|A0A318T8F7_9BRAD	Histidinol-phosphate aminotransferase OS	Rhodopseudomonas faecalis OX	0.07549	1.23118	9
tr|A0A6G8UFZ7|A0A6G8UFZ7_9ENTR	30S ribosomal protein S7 OS	Citrobacter sp. Y3 OX	0.23291	1.23178	3
tr|R8X307|R8X307_9ENTR	10 kDa chaperonin OS	Citrobacter sp. KTE151 OX	0.39618	1.23191	2
tr|A0A318TC02|A0A318TC02_9BRAD	DNA repair protein RecN OS	Rhodopseudomonas faecalis OX	0.25129	1.23237	4
tr|A0A318TGH1|A0A318TGH1_9BRAD	Threonine synthase OS	Rhodopseudomonas faecalis OX	0.0483	1.23319	3
tr|A0A318TR57|A0A318TR57_9BRAD	Two component Fis family sigma54 specific transcriptional regulator OS	Rhodopseudomonas faecalis OX	0.20719	1.23339	1
tr|A0A318TD24|A0A318TD24_9BRAD	Translation initiation factor IF-1 OS	Rhodopseudomonas faecalis OX	0.09912	1.23342	2
tr|A0A0N1BZ90|A0A0N1BZ90_9BRAD	Peptidase OS	Rhodopseudomonas sp. AAP120 OX	0.08635	1.23363	1
tr|A0A318TJ28|A0A318TJ28_9BRAD	Ornithine--oxo-acid transaminase OS	Rhodopseudomonas faecalis OX	0.2449	1.23392	6
tr|A0A521JS24|A0A521JS24_9CHLR	Chaperone protein DnaK OS	Anaerolineaceae bacterium OX	0.44522	1.23424	2
tr|F8WVS1|F8WVS1_9BACT	30S ribosomal protein S7 OS	Dysgonomonas mossii DSM 22836 OX	0.24126	1.23435	1
tr|A0A6L5E9B2|A0A6L5E9B2_9ENTR	DUF1471 domain-containing protein OS	Citrobacter sp. NMI7905_11 OX	0.37571	1.23538	1
tr|A0A318TCR9|A0A318TCR9_9BRAD	Pyridoxal phosphate homeostasis protein OS	Rhodopseudomonas faecalis OX	0.02348	1.2365	3
tr|A0A318T6Q4|A0A318T6Q4_9BRAD	Phosphoribosyl-ATP pyrophosphatase OS	Rhodopseudomonas faecalis OX	0.09147	1.23688	2
tr|A0A318TFP7|A0A318TFP7_9BRAD	Murein L,D-transpeptidase YcbB/YkuD OS	Rhodopseudomonas faecalis OX	0.12713	1.2374	2
tr|A0A318TEK7|A0A318TEK7_9BRAD	Response regulator receiver protein OS	Rhodopseudomonas faecalis OX	0.13784	1.2376	2
tr|F8WW87|F8WW87_9BACT	50S ribosomal protein L7/L12 OS	Dysgonomonas mossii DSM 22836 OX	0.41383	1.23894	5
tr|A0A318TGP6|A0A318TGP6_9BRAD	Uncharacterized protein OS	Rhodopseudomonas faecalis OX	0.01463	1.23915	4
tr|A0A318TJM0|A0A318TJM0_9BRAD	PEGA domain-containing protein OS	Rhodopseudomonas faecalis OX	0.29478	1.23961	2
tr|A0A1G7LN16|A0A1G7LN16_RHOCA	Hemolysin-type calcium-binding repeat-containing protein OS	Rhodobacter capsulatus OX	0.25685	1.24017	1
tr|A0A1G7GLL9|A0A1G7GLL9_RHOCA	Succinate dehydrogenase flavoprotein subunit OS	Rhodobacter capsulatus OX	0.59764	1.24034	3
tr|A0A318TC46|A0A318TC46_9BRAD	Succinate--CoA ligase [ADP-forming] subunit alpha OS	Rhodopseudomonas faecalis OX	0.03096	1.24034	10
tr|A0A318T8M8|A0A318T8M8_9BRAD	Molecular chaperone Hsp33 OS	Rhodopseudomonas faecalis OX	0.08319	1.24102	3
tr|D5ALY3|D5ALY3_RHOCB	50S ribosomal protein L1 OS	Rhodobacter capsulatus (strain ATCC BAA-309 / NBRC 16581 / SB1003) OX	0.37495	1.24114	2
tr|A0A318TI55|A0A318TI55_9BRAD	Uncharacterized protein OS	Rhodopseudomonas faecalis OX	0.04206	1.24114	2
tr|F8X0X5|F8X0X5_9BACT	Thiol peroxidase OS	Dysgonomonas mossii DSM 22836 OX	0.13724	1.24143	1
tr|Q2IWR2|Q2IWR2_RHOP2	SmpA/OmlA OS	Rhodopseudomonas palustris (strain HaA2) OX	0.29444	1.24162	1
tr|Q07QS1|Q07QS1_RHOP5	Nitrite/sulfite reductase, hemoprotein beta-component, ferrodoxin domain protein OS	Rhodopseudomonas palustris (strain BisA53) OX	0.28639	1.24328	1
tr|A0A1G7DCG3|A0A1G7DCG3_RHOCA	Aconitate hydratase OS	Rhodobacter capsulatus OX	0.21775	1.24481	2
tr|A0A318TL26|A0A318TL26_9BRAD	Exodeoxyribonuclease III OS	Rhodopseudomonas faecalis OX	0.08643	1.24556	2
tr|A0A318TET2|A0A318TET2_9BRAD	Signal peptide peptidase A OS	Rhodopseudomonas faecalis OX	0.16882	1.2456	2
tr|D5AP85|D5AP85_RHOCB	Antenna pigment protein alpha chain OS	Rhodobacter capsulatus (strain ATCC BAA-309 / NBRC 16581 / SB1003) OX	0.64043	1.24588	1
tr|A0A1G7KN77|A0A1G7KN77_RHOCA	ATP-dependent RNA helicase SUPV3L1/SUV3 OS	Rhodobacter capsulatus OX	0.38916	1.24605	1
tr|A0A318TB17|A0A318TB17_9BRAD	Acyl-CoA dehydrogenase OS	Rhodopseudomonas faecalis OX	0.06122	1.2469	6
tr|A0A318TA78|A0A318TA78_9BRAD	Xanthine dehydrogenase molybdenum binding subunit apoprotein OS	Rhodopseudomonas faecalis OX	0.4967	1.24809	1
tr|A0A318TSP2|A0A318TSP2_9BRAD	Squalene synthase HpnC OS	Rhodopseudomonas faecalis OX	0.06867	1.24879	1
tr|A0A318TJ98|A0A318TJ98_9BRAD	Winged helix family two component transcriptional regulator OS	Rhodopseudomonas faecalis OX	0.79755	1.24927	2
tr|A0A2T4J6N8|A0A2T4J6N8_RHOBL	Phasin OS	Rhodobacter blasticus DSM 2131 OX	0.66552	1.24945	2
tr|A0A318TDR3|A0A318TDR3_9BRAD	Acyl-CoA synthetase (AMP-forming)/AMP-acid ligase II OS	Rhodopseudomonas faecalis OX	0.29775	1.24961	1
tr|A0A318T941|A0A318T941_9BRAD	50S ribosomal protein L28 OS	Rhodopseudomonas faecalis OX	0.04118	1.24983	5
tr|A0A4U1JTI5|A0A4U1JTI5_RHOCA	Uncharacterized protein OS	Rhodobacter capsulatus OX	0.43411	1.24994	1
tr|A0A6G8UM97|A0A6G8UM97_9ENTR	DNA starvation/stationary phase protection protein OS	Citrobacter sp. Y3 OX	0.29782	1.25005	3
tr|A0A318TA28|A0A318TA28_9BRAD	ADP-L-glycero-D-manno-heptose-6-epimerase OS	Rhodopseudomonas faecalis OX	0.12147	1.25112	2
tr|A0A318TD50|A0A318TD50_9BRAD	Methionine aminopeptidase OS	Rhodopseudomonas faecalis OX	0.13747	1.25139	3
tr|A0A318T990|A0A318T990_9BRAD	Uncharacterized protein OS	Rhodopseudomonas faecalis OX	0.26908	1.25267	1
tr|A0A6G8UNH9|A0A6G8UNH9_9ENTR	Class I fructose-bisphosphate aldolase OS	Citrobacter sp. Y3 OX	0.26609	1.25341	4
tr|A0A318TGT7|A0A318TGT7_9BRAD	L-aspartate oxidase OS	Rhodopseudomonas faecalis OX	0.05454	1.2535	4
tr|A0A6G8UHD8|A0A6G8UHD8_9ENTR	Transaldolase OS	Citrobacter sp. Y3 OX	0.31928	1.25526	1
tr|F8WVU3|F8WVU3_9BACT	50S ribosomal protein L15 OS	Dysgonomonas mossii DSM 22836 OX	0.39918	1.25528	1
tr|R8WVA4|R8WVA4_9ENTR	Glucose-specific phosphotransferase enzyme IIA component OS	Citrobacter sp. KTE151 OX	0.30386	1.25543	1
tr|A0A318TK27|A0A318TK27_9BRAD	Iron-sulfur cluster carrier protein OS	Rhodopseudomonas faecalis OX	0.03724	1.25625	5
tr|A0A318TKV5|A0A318TKV5_9BRAD	Uncharacterized protein (TIGR02284 family) OS	Rhodopseudomonas faecalis OX	0.16327	1.25641	2
tr|A0A318TDL3|A0A318TDL3_9BRAD	DNA ligase OS	Rhodopseudomonas faecalis OX	0.02335	1.25649	3
tr|A0A318TPH0|A0A318TPH0_9BRAD	Heterodimeric methylmalonyl-CoA mutase small subunit OS	Rhodopseudomonas faecalis OX	0.03921	1.25726	10
tr|A0A6L5E355|A0A6L5E355_9ENTR	Phosphopyruvate hydratase OS	Citrobacter sp. NMI7905_11 OX	0.15617	1.25774	8
tr|D5AN14|D5AN14_RHOCB	Methylmalonyl-CoA epimerase OS	Rhodobacter capsulatus (strain ATCC BAA-309 / NBRC 16581 / SB1003) OX	0.57686	1.25847	1
tr|A0A318TFA2|A0A318TFA2_9BRAD	ATP-dependent Clp protease adapter protein ClpS OS	Rhodopseudomonas faecalis OX	0.25802	1.25856	1
tr|A0A1N7Q9L7|A0A1N7Q9L7_9RHOB	N-acetylneuraminate synthase OS	Rhodobacter aestuarii OX	0.45409	1.26151	1
tr|A0A318TKK6|A0A318TKK6_9BRAD	Lytic murein transglycosylase OS	Rhodopseudomonas faecalis OX	0.05247	1.26212	4
tr|A0A4Y9IQ22|A0A4Y9IQ22_9BACT	Class II fructose-1,6-bisphosphate aldolase OS	Dysgonomonas mossii OX	0.27099	1.26239	2
tr|A0A318TH87|A0A318TH87_9BRAD	Metal dependent phosphohydrolase OS	Rhodopseudomonas faecalis OX	0.15263	1.26307	2
tr|A0A318TLP5|A0A318TLP5_9BRAD	Uncharacterized protein OS	Rhodopseudomonas faecalis OX	0.04226	1.26382	1
tr|A0A318TS26|A0A318TS26_9BRAD	Putative pyruvate, phosphate dikinase regulatory protein OS	Rhodopseudomonas faecalis OX	0.07637	1.26397	2
tr|A0A318TFY8|A0A318TFY8_9BRAD	Soluble lytic murein transglycosylase OS	Rhodopseudomonas faecalis OX	0.33524	1.26526	2
tr|A0A6L5EAP0|A0A6L5EAP0_9ENTR	Cysteine synthase A OS	Citrobacter sp. NMI7905_11 OX	0.2533	1.26548	7
tr|A0A318TCT3|A0A318TCT3_9BRAD	30S ribosomal protein S7 OS	Rhodopseudomonas faecalis OX	0.06386	1.2657	6
tr|R8WXU1|R8WXU1_9ENTR	Major outer membrane lipoprotein Lpp OS	Citrobacter sp. KTE151 OX	0.09262	1.26626	2
tr|A0A4U1JZZ2|A0A4U1JZZ2_RHOCA	Nitrogenase protein alpha chain OS	Rhodobacter capsulatus OX	0.60785	1.26631	3
tr|A0A318TEG2|A0A318TEG2_9BRAD	Carbamoyltransferase OS	Rhodopseudomonas faecalis OX	0.55	1.26661	4
tr|A0A318TDX1|A0A318TDX1_9BRAD	Photosynthetic reaction center L subunit OS	Rhodopseudomonas faecalis OX	0.17002	1.26761	3
tr|A0A6H3AXT1|A0A6H3AXT1_9ENTR	Molecular chaperone OsmY OS	Citrobacter sp. A316 OX	0.35741	1.26873	1
tr|A0A318T8C1|A0A318T8C1_9BRAD	Membrane protein insertase YidC OS	Rhodopseudomonas faecalis OX	0.21518	1.269	3
tr|A0A318TCE2|A0A318TCE2_9BRAD	30S ribosomal protein S15 OS	Rhodopseudomonas faecalis OX	0.04271	1.27007	3
tr|A0A318TJA9|A0A318TJA9_9BRAD	Ferredoxin OS	Rhodopseudomonas faecalis OX	0.54016	1.27028	6
tr|A0A318TAT7|A0A318TAT7_9BRAD	Uncharacterized protein DUF3297 OS	Rhodopseudomonas faecalis OX	0.07232	1.27063	2
tr|A0A1G7GKB3|A0A1G7GKB3_RHOCA	Succinate--CoA ligase [ADP-forming] subunit beta OS	Rhodobacter capsulatus OX	0.20162	1.27135	4
tr|A0A318T800|A0A318T800_9BRAD	Protein RecA OS	Rhodopseudomonas faecalis OX	0.21124	1.27139	6
tr|A0A318TNL3|A0A318TNL3_9BRAD	Uncharacterized protein OS	Rhodopseudomonas faecalis OX	0.11781	1.27226	3
tr|A0A318T8T1|A0A318T8T1_9BRAD	Uncharacterized protein DUF992 OS	Rhodopseudomonas faecalis OX	0.13947	1.27248	9
tr|Q13CA0|Q13CA0_RHOPS	Phosphoribulokinase OS	Rhodopseudomonas palustris (strain BisB5) OX	0.1549	1.27503	1
tr|D5ALE9|D5ALE9_RHOCB	Uncharacterized protein OS	Rhodobacter capsulatus (strain ATCC BAA-309 / NBRC 16581 / SB1003) OX	0.52919	1.27537	2
tr|A0A6N8DJZ5|A0A6N8DJZ5_RHOAC	Aldose 1-epimerase family protein OS	Rhodoblastus acidophilus OX	0.27445	1.2755	1
tr|A0A0Q0WIB6|A0A0Q0WIB6_RHOCA	Ferredoxin III OS	Rhodobacter capsulatus OX	0.56587	1.27648	2
tr|A0A0Q0WHM1|A0A0Q0WHM1_RHOCA	Integration host factor subunit beta OS	Rhodobacter capsulatus OX	0.66634	1.27661	2
tr|A0A318TNR0|A0A318TNR0_9BRAD	2-dehydro-3-deoxyphosphooctonate aldolase OS	Rhodopseudomonas faecalis OX	0.39663	1.27681	3
tr|A0A3G6WQA2|A0A3G6WQA2_RHOSH	30S ribosomal protein S21 OS	Rhodobacter sphaeroides OX	0.29873	1.2782	1
tr|A0A318TFS6|A0A318TFS6_9BRAD	ATP-sulfurylase small subunit OS	Rhodopseudomonas faecalis OX	0.33699	1.27861	6
tr|A0A318TID3|A0A318TID3_9BRAD	Methionyl-tRNA formyltransferase OS	Rhodopseudomonas faecalis OX	0.00474	1.27881	5
tr|A0A318TH19|A0A318TH19_9BRAD	Enoyl-CoA hydratase/carnithine racemase OS	Rhodopseudomonas faecalis OX	0.00686	1.28126	7
tr|A0A6L5E8X8|A0A6L5E8X8_9ENTR	Ribose ABC transporter substrate-binding protein RbsB OS	Citrobacter sp. NMI7905_11 OX	0.07968	1.28134	8
tr|A0A318TI39|A0A318TI39_9BRAD	Protein-disulfide isomerase OS	Rhodopseudomonas faecalis OX	0.06338	1.28368	9
tr|R8WSC6|R8WSC6_9ENTR	50S ribosomal protein L21 OS	Citrobacter sp. KTE151 OX	0.18452	1.28411	1
sp|Q07RK6|FENR_RHOP5	Ferredoxin--NADP reductase OS	Rhodopseudomonas palustris (strain BisA53) OX	0.24238	1.28451	1
tr|A0A318TA80|A0A318TA80_9BRAD	50S ribosomal protein L24 OS	Rhodopseudomonas faecalis OX	0.05408	1.28454	4
tr|A0A1G7LZB8|A0A1G7LZB8_RHOCA	NitT/TauT family transport system substrate-binding protein OS	Rhodobacter capsulatus OX	0.48088	1.28548	6
tr|A0A318TF49|A0A318TF49_9BRAD	Lysyl-tRNA synthetase class 2 OS	Rhodopseudomonas faecalis OX	0.26087	1.28575	1
tr|D5AP99|D5AP99_RHOCB	Oligopeptide ABC transporter, periplasmic oligopeptide-binding protein OppA-1 OS	Rhodobacter capsulatus (strain ATCC BAA-309 / NBRC 16581 / SB1003) OX	0.72876	1.287	1
tr|A0A318TD61|A0A318TD61_9BRAD	Methionine synthase OS	Rhodopseudomonas faecalis OX	0.06543	1.28761	10
tr|Q07UB3|Q07UB3_RHOP5	Succinate dehydrogenase flavoprotein subunit OS	Rhodopseudomonas palustris (strain BisA53) OX	0.21012	1.28797	1
tr|A0A2T4J7W1|A0A2T4J7W1_RHOBL	30S ribosomal protein S4 OS	Rhodobacter blasticus DSM 2131 OX	0.22039	1.28885	2
tr|D2TN32|D2TN32_CITRI	30S ribosomal protein S6 OS	Citrobacter rodentium (strain ICC168) OX	0.14825	1.28939	2
tr|A0A318TBW2|A0A318TBW2_9BRAD	Uncharacterized protein OS	Rhodopseudomonas faecalis OX	0.31847	1.29113	1
tr|A0A0N8VFK1|A0A0N8VFK1_RHOCA	Pyridoxine 5'-phosphate synthase OS	Rhodobacter capsulatus OX	0.41702	1.2913	1
tr|D5AKP1|D5AKP1_RHOCB	Ribosome hibernation promoting factor OS	Rhodobacter capsulatus (strain ATCC BAA-309 / NBRC 16581 / SB1003) OX	0.32998	1.29135	3
tr|A0A318TFZ5|A0A318TFZ5_9BRAD	Heme utilization protein HuvX OS	Rhodopseudomonas faecalis OX	0.29695	1.29173	2
tr|D5ASX7|D5ASX7_RHOCB	Protein GrpE OS	Rhodobacter capsulatus (strain ATCC BAA-309 / NBRC 16581 / SB1003) OX	0.42978	1.29392	1
tr|A0A0Q0WLT6|A0A0Q0WLT6_RHOCA	Uncharacterized protein OS	Rhodobacter capsulatus OX	0.19067	1.29408	1
tr|A0A318TKD3|A0A318TKD3_9BRAD	Deoxyuridine 5'-triphosphate nucleotidohydrolase OS	Rhodopseudomonas faecalis OX	0.1956	1.29443	1
tr|A0A6N2U5M2|A0A6N2U5M2_CITAM	Flagellin OS	Citrobacter amalonaticus OX	0.02922	1.29464	10
tr|A0A1G7RR11|A0A1G7RR11_RHOCA	Uncharacterized protein OS	Rhodobacter capsulatus OX	0.63545	1.29584	4
tr|E6VD58|E6VD58_RHOPX	LemA family protein OS	Rhodopseudomonas palustris (strain DX-1) OX	0.43411	1.29719	1
sp|Q218M1|RS4_RHOPB	30S ribosomal protein S4 OS	Rhodopseudomonas palustris (strain BisB18) OX	0.14802	1.29791	2
tr|C8S5B1|C8S5B1_9RHOB	Enoyl-[acyl-carrier-protein] reductase [NADH] OS	Rhodobacter sp. SW2 OX	0.35111	1.29807	1
tr|A0A318TGQ5|A0A318TGQ5_9BRAD	Elongation factor G OS	Rhodopseudomonas faecalis OX	0.21309	1.2989	10
tr|A0A318TZ09|A0A318TZ09_9BRAD	Hopanoid biosynthesis associated radical SAM protein HpnH OS	Rhodopseudomonas faecalis OX	0.07718	1.29919	6
tr|A0A318TIR5|A0A318TIR5_9BRAD	Zinc/manganese transport system substrate-binding protein OS	Rhodopseudomonas faecalis OX	0.07197	1.3001	1
tr|Q216M1|Q216M1_RHOPB	Phosphopantetheine-binding OS	Rhodopseudomonas palustris (strain BisB18) OX	0.21278	1.30025	2
tr|A8AQB9|A8AQB9_CITK8	Uncharacterized protein OS	Citrobacter koseri (strain ATCC BAA-895 / CDC 4225-83 / SGSC4696) OX	0.12772	1.30085	1
tr|A0A318TPS4|A0A318TPS4_9BRAD	Sec translocon accessory complex subunit YajC OS	Rhodopseudomonas faecalis OX	0.109	1.30197	3
tr|A0A318T803|A0A318T803_9BRAD	Glycine dehydrogenase (decarboxylating) OS	Rhodopseudomonas faecalis OX	0.05111	1.30449	1
tr|A0A2R4GZB1|A0A2R4GZB1_RHOPL	O-acetylhomoserine sulfhydrylase / O-succinylhomoserine sulfhydrylase OS	Rhodopseudomonas palustris OX	0.42819	1.30485	1
tr|A0A1G7C3U9|A0A1G7C3U9_RHOCA	Uncharacterized protein OS	Rhodobacter capsulatus OX	0.2163	1.30777	2
tr|A0A318TJE5|A0A318TJE5_9BRAD	D-3-phosphoglycerate dehydrogenase OS	Rhodopseudomonas faecalis OX	0.03953	1.30794	10
tr|A0A318TNC2|A0A318TNC2_9BRAD	Amidophosphoribosyltransferase OS	Rhodopseudomonas faecalis OX	0.03975	1.30855	9
tr|D5ATL1|D5ATL1_RHOCB	Uncharacterized protein OS	Rhodobacter capsulatus (strain ATCC BAA-309 / NBRC 16581 / SB1003) OX	0.23105	1.30856	1
tr|F8WW85|F8WW85_9BACT	50S ribosomal protein L1 OS	Dysgonomonas mossii DSM 22836 OX	0.28608	1.31049	1
tr|A0A318TB01|A0A318TB01_9BRAD	Isocitrase OS	Rhodopseudomonas faecalis OX	0.10299	1.3109	10
tr|A0A318TD63|A0A318TD63_9BRAD	3-oxoacid CoA-transferase subunit A OS	Rhodopseudomonas faecalis OX	0.07174	1.31216	6
tr|A0A318TK86|A0A318TK86_9BRAD	Cysteine desulfurase OS	Rhodopseudomonas faecalis OX	0.00076	1.31253	7
tr|A0A2S6NM92|A0A2S6NM92_RHOGL	Elongation factor Tu OS	Rhodopila globiformis OX	0.57918	1.3129	1
tr|A0A318TRC0|A0A318TRC0_9BRAD	Uncharacterized protein OS	Rhodopseudomonas faecalis OX	0.05451	1.31325	4
tr|A0A318TCZ7|A0A318TCZ7_9BRAD	Protein-export protein SecB OS	Rhodopseudomonas faecalis OX	0.08496	1.31382	4
tr|A0A318TM64|A0A318TM64_9BRAD	Cytochrome c-type biogenesis protein CcmE OS	Rhodopseudomonas faecalis OX	0.16268	1.3144	1
tr|A0A318THH4|A0A318THH4_9BRAD	Nitronate monooxygenase OS	Rhodopseudomonas faecalis OX	0.05391	1.3151	10
tr|A0A6G8UHH3|A0A6G8UHH3_9ENTR	L-asparaginase 2 OS	Citrobacter sp. Y3 OX	0.03129	1.31641	7
tr|A0A6B3RM51|A0A6B3RM51_9RHOB	Helix-turn-helix transcriptional regulator OS	Rhodobacter sp. ETT8 OX	0.09682	1.3178	1
tr|Q6N9L5|Q6N9L5_RHOPA	Light-harvesting complex 1 beta chain OS	Rhodopseudomonas palustris (strain ATCC BAA-98 / CGA009) OX	0.22917	1.31948	1
tr|A0A6N9KCU2|A0A6N9KCU2_CITAM	Transporter substrate-binding domain-containing protein OS	Citrobacter amalonaticus OX	0.20529	1.3196	2
tr|A0A212IZX2|A0A212IZX2_9BACT	Uncharacterized protein OS	uncultured Dysgonomonas sp. OX	0.13789	1.32237	1
[truncated: 315 more rows]

## Sheet: DMSO
Peak Name	Group	Columna5	p-value	Fold Change	# peptides
tr|A0A318THK0|A0A318THK0_9BRAD	4Fe-4S binding protein OS	Rhodopseudomonas faecalis OX	1.3454e-05	0.128902	1
tr|A0A318TX31|A0A318TX31_9BRAD	Ferredoxin-like protein OS	Rhodopseudomonas faecalis OX	2.134e-05	0.145335	2
tr|A0A0D7EI00|A0A0D7EI00_RHOPL	Nitrogenase molybdenum-iron protein subunit beta OS	Rhodopseudomonas palustris OX	0.00383	0.146189	2
tr|F8WWL2|F8WWL2_9BACT	SGNH_hydro domain-containing protein OS	Dysgonomonas mossii DSM 22836 OX	0.00183	0.150875	5
tr|A0A318TX40|A0A318TX40_9BRAD	Ferredoxin III OS	Rhodopseudomonas faecalis OX	0.00045	0.172335	6
tr|A0A2T4JCX4|A0A2T4JCX4_RHOBL	Nitrogenase molybdenum-iron protein beta chain OS	Rhodobacter blasticus DSM 2131 OX	0.03385	0.174181	7
tr|Q07HZ7|Q07HZ7_RHOP5	Electron transfer flavoprotein beta-subunit OS	Rhodopseudomonas palustris (strain BisA53) OX	4.4591e-06	0.178341	1
tr|A0A318TK51|A0A318TK51_9BRAD	Aspartate/methionine/tyrosine aminotransferase OS	Rhodopseudomonas faecalis OX	0.02587	0.178628	4
tr|A0A318THI9|A0A318THI9_9BRAD	Nitrogenase protein alpha chain OS	Rhodopseudomonas faecalis OX	1.571e-07	0.181416	7
tr|A0A318TH39|A0A318TH39_9BRAD	Electron transfer flavoprotein alpha subunit apoprotein OS	Rhodopseudomonas faecalis OX	1.3489e-05	0.187353	3
tr|A0A318TQF9|A0A318TQF9_9BRAD	Nitrogenase molybdenum-iron protein beta chain OS	Rhodopseudomonas faecalis OX	6.4437e-08	0.192471	0
tr|A0A2T4JD50|A0A2T4JD50_RHOBL	Nitrogenase protein alpha chain OS	Rhodobacter blasticus DSM 2131 OX	0.03866	0.210097	4
tr|R8WLX1|R8WLX1_9ENTR	50S ribosomal protein L18 OS	Citrobacter sp. KTE151 OX	0.00175	0.212546	2
tr|A0A318TK39|A0A318TK39_9BRAD	Protein FixC OS	Rhodopseudomonas faecalis OX	4.1166e-05	0.212664	6
tr|A0A318TH26|A0A318TH26_9BRAD	Electron transfer flavoprotein beta subunit OS	Rhodopseudomonas faecalis OX	5.3196e-07	0.216824	1
tr|A0A318TH61|A0A318TH61_9BRAD	Putative nitrogen fixation protein OS	Rhodopseudomonas faecalis OX	0.00033	0.232129	4
tr|A0A318TJB0|A0A318TJB0_9BRAD	Rubrerythrin OS	Rhodopseudomonas faecalis OX	0.00015	0.234236	4
tr|Q2J1G4|Q2J1G4_RHOP2	Protein FixC OS	Rhodopseudomonas palustris (strain HaA2) OX	0.00116	0.256579	3
tr|A0A318TX50|A0A318TX50_9BRAD	Nitrogen fixation protein NifT OS	Rhodopseudomonas faecalis OX	0.00015	0.259052	8
tr|A0A318TJA9|A0A318TJA9_9BRAD	Ferredoxin OS	Rhodopseudomonas faecalis OX	0.00308	0.285555	8
tr|A0A318TE41|A0A318TE41_9BRAD	Glycolate oxidase OS	Rhodopseudomonas faecalis OX	0.01433	0.28729	1
tr|A0A318TPG9|A0A318TPG9_9BRAD	Delta-aminolevulinic acid dehydratase OS	Rhodopseudomonas faecalis OX	0.00013	1.46823	6
tr|A0A2T4JC00|A0A2T4JC00_RHOBL	Electron transfer flavoprotein subunit beta OS	Rhodobacter blasticus DSM 2131 OX	1.8242e-06	0.291936	5
tr|A0A3G6WQA2|A0A3G6WQA2_RHOSH	30S ribosomal protein S21 OS	Rhodobacter sphaeroides OX	0.0163	0.295215	8
tr|A0A318TK62|A0A318TK62_9BRAD	Nitrogenase iron protein OS	Rhodopseudomonas faecalis OX	4.9515e-05	0.303886	3
tr|A0A318TVD6|A0A318TVD6_9BRAD	Uncharacterized protein OS	Rhodopseudomonas faecalis OX	0.0055	0.317394	1
tr|A0A318TQF0|A0A318TQF0_9BRAD	Cysteine desulfurase OS	Rhodopseudomonas faecalis OX	0.00011	0.334986	3
tr|A0A318TH51|A0A318TH51_9BRAD	Ammonium transporter OS	Rhodopseudomonas faecalis OX	0.005	0.338965	1
tr|A0A318TF62|A0A318TF62_9BRAD	Aminotransferase OS	Rhodopseudomonas faecalis OX	0.00025	1.48749	1
tr|A0A318TMA8|A0A318TMA8_9BRAD	SIR2-like protein OS	Rhodopseudomonas faecalis OX	4.9368e-05	0.343372	2
tr|A0A6N2UPI1|A0A6N2UPI1_CITAM	Universal stress protein F OS	Citrobacter amalonaticus OX	0.01463	0.357443	8
tr|A0A318T8L6|A0A318T8L6_9BRAD	Transcription termination/antitermination protein NusA OS	Rhodopseudomonas faecalis OX	0.00028	1.40293	0
tr|A0A318THU9|A0A318THU9_9BRAD	CRISPR-associated Cas5d family protein OS	Rhodopseudomonas faecalis OX	0.03605	0.369146	8
tr|A0A318TDC4|A0A318TDC4_9BRAD	DNA gyrase subunit A OS	Rhodopseudomonas faecalis OX	0.00034	1.43368	3
tr|Q07HY3|Q07HY3_RHOP5	Nitrogenase molybdenum-iron protein beta chain OS	Rhodopseudomonas palustris (strain BisA53) OX	0.00112	0.370799	1
tr|A0A318TZM2|A0A318TZM2_9BRAD	Cytokinin riboside 5'-monophosphate phosphoribohydrolase OS	Rhodopseudomonas faecalis OX	0.00036	1.19752	2
tr|A0A318U0M4|A0A318U0M4_9BRAD	30S ribosomal protein S2 OS	Rhodopseudomonas faecalis OX	0.00039	1.24617	6
tr|A0A318TL74|A0A318TL74_9BRAD	30S ribosomal protein S9 OS	Rhodopseudomonas faecalis OX	0.00044	1.29352	6
tr|A0A318TI11|A0A318TI11_9BRAD	FeS assembly SUF system protein OS	Rhodopseudomonas faecalis OX	0.00027	0.380924	8
tr|A0A2T4JFE5|A0A2T4JFE5_RHOBL	Sugar ABC transporter substrate-binding protein OS	Rhodobacter blasticus DSM 2131 OX	0.00083	0.382789	5
tr|A0A318THN3|A0A318THN3_9BRAD	Nitrogenase iron-molybdenum cofactor biosynthesis protein NifE OS	Rhodopseudomonas faecalis OX	3.531e-05	0.38471	4
tr|A0A318TDD9|A0A318TDD9_9BRAD	Uroporphyrinogen decarboxylase OS	Rhodopseudomonas faecalis OX	0.00056	1.19581	6
tr|A0A318THI0|A0A318THI0_9BRAD	Nitrogen fixation protein NifU OS	Rhodopseudomonas faecalis OX	0.00248	0.385556	2
tr|A0A2T4JD28|A0A2T4JD28_RHOBL	Nitrogenase iron protein OS	Rhodobacter blasticus DSM 2131 OX	0.00515	0.387005	0
tr|A0A318TUN5|A0A318TUN5_9BRAD	Uncharacterized protein OS	Rhodopseudomonas faecalis OX	0.00762	0.388101	6
tr|A0A318TZA8|A0A318TZA8_9BRAD	2-dehydropantoate 2-reductase OS	Rhodopseudomonas faecalis OX	0.0411	0.3935	7
tr|A0A318TJ74|A0A318TJ74_9BRAD	Phosphoenolpyruvate carboxykinase (ATP) OS	Rhodopseudomonas faecalis OX	0.00078	1.39366	4
tr|Q20Y00|Q20Y00_RHOPB	Nitrogenase iron protein OS	Rhodopseudomonas palustris (strain BisB18) OX	0.01336	0.401661	4
tr|A0A318TQN6|A0A318TQN6_9BRAD	FeMo cofactor biosynthesis protein NifB OS	Rhodopseudomonas faecalis OX	0.00305	0.403841	6
tr|A0A318TLW9|A0A318TLW9_9BRAD	Glutaryl-CoA dehydrogenase OS	Rhodopseudomonas faecalis OX	0.00102	1.31538	7
tr|A0A318T8T4|A0A318T8T4_9BRAD	Ribosomal-protein-alanine N-acetyltransferase OS	Rhodopseudomonas faecalis OX	0.00354	0.407845	2
tr|A0A1H8QJL9|A0A1H8QJL9_9BRAD	Bacterioferritin OS	Rhodopseudomonas pseudopalustris OX	0.01654	0.417186	7
tr|A0A3G2TG17|A0A3G2TG17_9RHOB	Nitrogenase iron protein OS	Rhodobacter sp. OX	0.03945	0.427254	1
tr|A0A318TFR5|A0A318TFR5_9BRAD	Hydrogenase large subunit OS	Rhodopseudomonas faecalis OX	0.03096	0.441871	5
tr|A0A318TH34|A0A318TH34_9BRAD	Nitrogen fixation protein NifX OS	Rhodopseudomonas faecalis OX	8.4321e-05	0.458435	6
tr|A0A318TC39|A0A318TC39_9BRAD	Tripartite-type tricarboxylate transporter receptor subunit TctC OS	Rhodopseudomonas faecalis OX	0.00136	0.758627	1
tr|A0A318THF0|A0A318THF0_9BRAD	Hemerythrin-like domain-containing protein OS	Rhodopseudomonas faecalis OX	0.00137	1.3305	0
tr|A0A318TGQ5|A0A318TGQ5_9BRAD	Elongation factor G OS	Rhodopseudomonas faecalis OX	0.00138	1.46609	2
tr|A0A318TKE8|A0A318TKE8_9BRAD	Bacterioferritin OS	Rhodopseudomonas faecalis OX	6.5922e-06	0.459956	2
tr|A0A318TJ20|A0A318TJ20_9BRAD	Trehalose 6-phosphate synthase OS	Rhodopseudomonas faecalis OX	0.02048	0.462887	5
tr|A0A318TB62|A0A318TB62_9BRAD	DNA-binding transcriptional regulator NtrC OS	Rhodopseudomonas faecalis OX	0.00152	0.726049	3
tr|A0A318TLA6|A0A318TLA6_9BRAD	Pyruvate dehydrogenase E1 component subunit alpha OS	Rhodopseudomonas faecalis OX	0.00153	0.760569	6
tr|A0A318TAC7|A0A318TAC7_9BRAD	50S ribosomal protein L15 OS	Rhodopseudomonas faecalis OX	0.00155	1.15425	1
tr|A0A318TIH6|A0A318TIH6_9BRAD	Iron complex transport system substrate-binding protein OS	Rhodopseudomonas faecalis OX	0.00189	0.475625	6
tr|A0A318TCT5|A0A318TCT5_9BRAD	50S ribosomal protein L29 OS	Rhodopseudomonas faecalis OX	0.00175	1.25393	5
tr|A0A318TF09|A0A318TF09_9BRAD	Nitrogen regulatory protein P-II OS	Rhodopseudomonas faecalis OX	0.00057	0.486033	1
tr|A0A318T8V5|A0A318T8V5_9BRAD	4-hydroxy-3-methylbut-2-en-1-yl diphosphate synthase (flavodoxin) OS	Rhodopseudomonas faecalis OX	0.0018	1.22984	4
tr|A0A318TIH9|A0A318TIH9_9BRAD	Nitrogenase iron-molybdenum cofactor biosynthesis protein NifN OS	Rhodopseudomonas faecalis OX	0.00027	0.497087	0
tr|Q2J0T9|Q2J0T9_RHOP2	Enoyl-[acyl-carrier-protein] reductase [NADH] OS	Rhodopseudomonas palustris (strain HaA2) OX	0.04935	0.504191	3
tr|A0A318TJT9|A0A318TJT9_9BRAD	50S ribosomal protein L19 OS	Rhodopseudomonas faecalis OX	0.00208	1.14792	7
tr|A0A4Y9IQI2|A0A4Y9IQI2_9BACT	Glutamine synthetase type III OS	Dysgonomonas mossii OX	0.00142	0.512199	5
tr|R8WKJ0|R8WKJ0_9ENTR	Periplasmic dipeptide transporter OS	Citrobacter sp. KTE151 OX	0.01119	0.522476	6
tr|A0A318TJM4|A0A318TJM4_9BRAD	Phasin OS	Rhodopseudomonas faecalis OX	0.00141	0.527954	3
tr|A0A318TIX4|A0A318TIX4_9BRAD	DNA-directed RNA polymerase subunit omega OS	Rhodopseudomonas faecalis OX	0.00218	1.29196	1
tr|A0A318TLW0|A0A318TLW0_9BRAD	Outer membrane protein OmpA-like peptidoglycan-associated protein OS	Rhodopseudomonas faecalis OX	0.00847	0.541431	4
tr|A0A318TIG6|A0A318TIG6_9BRAD	Nitrogenase-stabilizing/protective protein NifW OS	Rhodopseudomonas faecalis OX	0.00736	0.542735	6
tr|A0A318TKV5|A0A318TKV5_9BRAD	Uncharacterized protein (TIGR02284 family) OS	Rhodopseudomonas faecalis OX	0.00349	0.550817	5
tr|A0A318TSU4|A0A318TSU4_9BRAD	Uncharacterized protein OS	Rhodopseudomonas faecalis OX	0.04255	0.5527	6
tr|A0A318TBE3|A0A318TBE3_9BRAD	Phosphoserine aminotransferase OS	Rhodopseudomonas faecalis OX	0.00239	1.21881	0
tr|A0A318TGN0|A0A318TGN0_9BRAD	Nucleoid-associated protein BJ122_109140 OS	Rhodopseudomonas faecalis OX	0.00247	1.24778	4
tr|A0A318T9B0|A0A318T9B0_9BRAD	Putative polyhydroxyalkanoic acid system protein OS	Rhodopseudomonas faecalis OX	0.00786	0.562529	0
tr|A0A318TK06|A0A318TK06_9BRAD	Uncharacterized protein OS	Rhodopseudomonas faecalis OX	0.00251	0.565822	8
tr|A0A318TPH0|A0A318TPH0_9BRAD	Heterodimeric methylmalonyl-CoA mutase small subunit OS	Rhodopseudomonas faecalis OX	0.00255	1.46829	2
tr|A0A318TCU3|A0A318TCU3_9BRAD	50S ribosomal protein L11 OS	Rhodopseudomonas faecalis OX	0.00263	1.26155	1
tr|A0A318TLQ0|A0A318TLQ0_9BRAD	Light-independent protochlorophyllide reductase subunit N OS	Rhodopseudomonas faecalis OX	0.00266	1.28933	0
tr|A0A6N9KCU2|A0A6N9KCU2_CITAM	Transporter substrate-binding domain-containing protein OS	Citrobacter amalonaticus OX	0.00987	0.572003	4
tr|A0A318TAJ1|A0A318TAJ1_9BRAD	50S ribosomal protein L5 OS	Rhodopseudomonas faecalis OX	0.00273	1.21328	6
tr|A0A418VE41|A0A418VE41_RHOPL	DNA-binding response regulator OS	Rhodopseudomonas palustris OX	0.00273	1.25318	0
tr|A0A318T778|A0A318T778_9BRAD	Homoserine O-acetyltransferase OS	Rhodopseudomonas faecalis OX	0.00286	1.24074	2
tr|A0A318T985|A0A318T985_9BRAD	DNA-directed RNA polymerase subunit alpha OS	Rhodopseudomonas faecalis OX	0.00297	1.22787	7
tr|A0A318TPS2|A0A318TPS2_9BRAD	30S ribosomal protein S3 OS	Rhodopseudomonas faecalis OX	0.00305	1.22113	7
tr|A0A318TK50|A0A318TK50_9BRAD	Iron-sulfur cluster assembly protein OS	Rhodopseudomonas faecalis OX	0.00369	0.585348	1
tr|A0A318T7D8|A0A318T7D8_9BRAD	Acetylornithine aminotransferase OS	Rhodopseudomonas faecalis OX	0.00306	1.37822	8
tr|A0A318T8Z8|A0A318T8Z8_9BRAD	Amino acid/amide ABC transporter substrate-binding protein (HAAT family) OS	Rhodopseudomonas faecalis OX	0.00307	1.37387	3
tr|A0A318TGR8|A0A318TGR8_9BRAD	Quinolinate synthase A OS	Rhodopseudomonas faecalis OX	0.01289	0.586213	6
tr|A0A318TI75|A0A318TI75_9BRAD	Putative NAD(P)-binding protein OS	Rhodopseudomonas faecalis OX	0.03224	0.594713	0
tr|A0A318TN89|A0A318TN89_9BRAD	Putative NAD(P)H nitroreductase OS	Rhodopseudomonas faecalis OX	0.00315	1.15956	3
tr|A0A318U086|A0A318U086_9BRAD	Putative circularly permuted ATP-grasp superfamily protein OS	Rhodopseudomonas faecalis OX	0.01131	0.604213	2
tr|A0A318TNZ7|A0A318TNZ7_9BRAD	L-isoaspartyl protein carboxyl methyltransferase OS	Rhodopseudomonas faecalis OX	0.00325	1.17891	3
tr|A0A318TD17|A0A318TD17_9BRAD	DnaJ-class molecular chaperone OS	Rhodopseudomonas faecalis OX	0.00344	1.17127	7
tr|A0A318THH0|A0A318THH0_9BRAD	Thioredoxin reductase OS	Rhodopseudomonas faecalis OX	0.00348	1.33091	0.493899
tr|A0A318TC49|A0A318TC49_9BRAD	Uncharacterized protein OS	Rhodopseudomonas faecalis OX	0.00233	0.616365	8
tr|A0A318TJK4|A0A318TJK4_9BRAD	NepR domain-containing protein OS	Rhodopseudomonas faecalis OX	0.01178	0.617086	4
tr|A0A318THV3|A0A318THV3_9BRAD	Uncharacterized protein OS	Rhodopseudomonas faecalis OX	0.00354	1.17781	3.18085
tr|A0A318TH70|A0A318TH70_9BRAD	Nitrogen fixation protein NifZ OS	Rhodopseudomonas faecalis OX	0.02619	0.620445	2
tr|A0A318TUG1|A0A318TUG1_9BRAD	Propionyl-CoA carboxylase carboxyltransferase subunit OS	Rhodopseudomonas faecalis OX	0.00362	1.21328	6.65239
tr|A0A318TK86|A0A318TK86_9BRAD	Cysteine desulfurase OS	Rhodopseudomonas faecalis OX	0.00366	0.667303	7.19257
tr|A0A318TJK1|A0A318TJK1_9BRAD	Uncharacterized protein OS	Rhodopseudomonas faecalis OX	0.01132	0.623903	5
tr|A0A318TJR2|A0A318TJR2_9BRAD	Uncharacterized protein OS	Rhodopseudomonas faecalis OX	0.01054	0.627206	2
tr|A0A318TBQ4|A0A318TBQ4_9BRAD	Chromosome segregation DNA-binding protein OS	Rhodopseudomonas faecalis OX	0.00373	1.30135	6.38558
tr|Q216M1|Q216M1_RHOPB	Phosphopantetheine-binding OS	Rhodopseudomonas palustris (strain BisB18) OX	0.0049	0.642902	3
tr|A0A318TD61|A0A318TD61_9BRAD	Methionine synthase OS	Rhodopseudomonas faecalis OX	0.00381	1.47635	5.4633
tr|Q07RI7|Q07RI7_RHOP5	UspA domain protein OS	Rhodopseudomonas palustris (strain BisA53) OX	0.00019	0.647911	0
tr|A0A318TBQ0|A0A318TBQ0_9BRAD	Glutathione S-transferase OS	Rhodopseudomonas faecalis OX	0.02373	1.5062	2
tr|A0A318TNK5|A0A318TNK5_9BRAD	Outer membrane protein assembly factor BamA OS	Rhodopseudomonas faecalis OX	0.00388	1.21995	7.37234
tr|A0A318TAD2|A0A318TAD2_9BRAD	Uncharacterized protein OS	Rhodopseudomonas faecalis OX	0.00393	0.809972	3.30593
tr|Q07IM8|Q07IM8_RHOP5	Response regulator receiver protein OS	Rhodopseudomonas palustris (strain BisA53) OX	0.00743	1.51397	6
tr|B3QDB7|B3QDB7_RHOPT	TonB-dependent receptor plug OS	Rhodopseudomonas palustris (strain TIE-1) OX	0.00413	1.52714	8
tr|A0A318TGK2|A0A318TGK2_9BRAD	Uncharacterized protein OS	Rhodopseudomonas faecalis OX	0.00373	1.53813	3
tr|A0A318TD24|A0A318TD24_9BRAD	Translation initiation factor IF-1 OS	Rhodopseudomonas faecalis OX	0.01838	1.53924	8
tr|A0A318TEE8|A0A318TEE8_9BRAD	Collagenase-like PrtC family protease OS	Rhodopseudomonas faecalis OX	0.00215	1.54037	6
tr|A0A318TEL7|A0A318TEL7_9BRAD	50S ribosomal protein L16 OS	Rhodopseudomonas faecalis OX	0.00436	1.13503	0.51943
tr|A0A318TGR6|A0A318TGR6_9BRAD	Methyl-accepting chemotaxis sensory transducer OS	Rhodopseudomonas faecalis OX	0.04903	1.54357	1
tr|A0A318TM29|A0A318TM29_9BRAD	Glycolate oxidase FAD binding subunit OS	Rhodopseudomonas faecalis OX	0.00462	1.32981	3.27249
tr|A0A318TK42|A0A318TK42_9BRAD	Thioredoxin peroxidase OS	Rhodopseudomonas faecalis OX	0.00462	1.54431	4
tr|A0A318TEP0|A0A318TEP0_9BRAD	50S ribosomal protein L10 OS	Rhodopseudomonas faecalis OX	0.00491	1.14727	1.96973
tr|A0A318TGI6|A0A318TGI6_9BRAD	Fructose-1,6-bisphosphatase class 1 OS	Rhodopseudomonas faecalis OX	0.01267	1.54747	7
tr|A0A318TE70|A0A318TE70_9BRAD	Translation initiation factor 3 (BIF-3) OS	Rhodopseudomonas faecalis OX	0.012	1.54749	7
tr|A0A318TEL6|A0A318TEL6_9BRAD	Nucleoside diphosphate kinase OS	Rhodopseudomonas faecalis OX	0.00503	1.11182	5.74885
tr|A0A318TKZ4|A0A318TKZ4_9BRAD	GTP cyclohydrolase 1 OS	Rhodopseudomonas faecalis OX	0.0101	1.55044	7
tr|A0A318TBN1|A0A318TBN1_9BRAD	HAD superfamily hydrolase (TIGR01509 family) OS	Rhodopseudomonas faecalis OX	0.0367	1.569	3
tr|A0A318TJR8|A0A318TJR8_9BRAD	Malate dehydrogenase OS	Rhodopseudomonas faecalis OX	0.00539	1.0734	2.6951
tr|A0A318T820|A0A318T820_9BRAD	Phosphomethylpyrimidine synthase OS	Rhodopseudomonas faecalis OX	0.01406	1.5701	2
tr|A0A318TDW0|A0A318TDW0_9BRAD	Putative protease OS	Rhodopseudomonas faecalis OX	0.04686	1.57029	5
tr|A0A318TN39|A0A318TN39_9BRAD	Chaperone required for assembly of F1-ATPase OS	Rhodopseudomonas faecalis OX	0.00684	1.57123	3
tr|A0A318T8R0|A0A318T8R0_9BRAD	Succinate dehydrogenase iron-sulfur subunit OS	Rhodopseudomonas faecalis OX	0.00558	0.922463	2.16064
tr|A0A318TAR6|A0A318TAR6_9BRAD	Cell cycle transcriptional regulator CtrA OS	Rhodopseudomonas faecalis OX	0.00585	1.39574	2.07059
tr|A0A318TBF4|A0A318TBF4_9BRAD	Metallo-beta-lactamase family protein OS	Rhodopseudomonas faecalis OX	0.00592	1.11907	0.108527
tr|A0A318THG6|A0A318THG6_9BRAD	DNA topoisomerase 1 OS	Rhodopseudomonas faecalis OX	0.00616	1.24539	6.0446
tr|A0A1H8VUG6|A0A1H8VUG6_9BRAD	60 kDa chaperonin OS	Rhodopseudomonas pseudopalustris OX	0.02201	1.57466	4
tr|A0A318TDU0|A0A318TDU0_9BRAD	Precorrin-6Y C5,15-methyltransferase (Decarboxylating) OS	Rhodopseudomonas faecalis OX	0.00625	1.18345	2.15663
tr|A0A318T9M0|A0A318T9M0_9BRAD	D-alanine--D-alanine ligase OS	Rhodopseudomonas faecalis OX	0.00641	1.31512	8.47389
tr|A0A318TAL9|A0A318TAL9_9BRAD	Uncharacterized protein OS	Rhodopseudomonas faecalis OX	0.00666	1.22196	5.18175
tr|R8WTK7|R8WTK7_9ENTR	Cold shock-like protein CspC OS	Citrobacter sp. KTE151 OX	0.04315	1.57755	7
tr|A0A318TFW3|A0A318TFW3_9BRAD	Superfamily II DNA/RNA helicase OS	Rhodopseudomonas faecalis OX	0.03488	1.60112	2
tr|Q21D73|Q21D73_RHOPB	TonB-dependent receptor, plug OS	Rhodopseudomonas palustris (strain BisB18) OX	0.00688	1.47535	0.717465
tr|A0A318T8A2|A0A318T8A2_9BRAD	Carbon-monoxide dehydrogenase medium subunit OS	Rhodopseudomonas faecalis OX	0.0069	1.23463	4.93836
tr|A0A318TCS5|A0A318TCS5_9BRAD	50S ribosomal protein L30 OS	Rhodopseudomonas faecalis OX	0.007	1.22364	0.379694
tr|A0A318TD82|A0A318TD82_9BRAD	Peptide methionine sulfoxide reductase MsrB OS	Rhodopseudomonas faecalis OX	0.0299	1.60715	0
tr|A0A318TJ62|A0A318TJ62_9BRAD	Acetyl-coenzyme A synthetase OS	Rhodopseudomonas faecalis OX	0.00712	1.12653	7.75397
tr|A0A318T8T1|A0A318T8T1_9BRAD	Uncharacterized protein DUF992 OS	Rhodopseudomonas faecalis OX	0.00714	1.38067	7.03051
tr|A0A318TNG9|A0A318TNG9_9BRAD	Lon protease OS	Rhodopseudomonas faecalis OX	0.00726	1.33239	0.0583966
tr|A0A318TAT7|A0A318TAT7_9BRAD	Uncharacterized protein DUF3297 OS	Rhodopseudomonas faecalis OX	0.01799	1.6112	4
tr|A0A318TH80|A0A318TH80_9BRAD	Uncharacterized protein OS	Rhodopseudomonas faecalis OX	0.0297	1.61391	6
tr|A0A318TC38|A0A318TC38_9BRAD	Anaerobic Mg-protoporphyrin IX monomethyl ester oxidative cyclase OS	Rhodopseudomonas faecalis OX	0.00367	1.61572	2
tr|A0A318TFZ2|A0A318TFZ2_9BRAD	Ribonucleoside-triphosphate reductase class III catalytic subunit OS	Rhodopseudomonas faecalis OX	0.0271	1.62875	7
tr|A0A318TMY2|A0A318TMY2_9BRAD	2-oxoglutarate ferredoxin oxidoreductase subunit gamma OS	Rhodopseudomonas faecalis OX	0.00753	1.37332	8.75166
tr|A0A318TP75|A0A318TP75_9BRAD	GTPase Obg OS	Rhodopseudomonas faecalis OX	0.00756	1.30674	2.6651
tr|A0A318TNC2|A0A318TNC2_9BRAD	Amidophosphoribosyltransferase OS	Rhodopseudomonas faecalis OX	6.3863e-06	1.62998	8
tr|A0A318T9A5|A0A318T9A5_9BRAD	30S ribosomal protein S19 OS	Rhodopseudomonas faecalis OX	0.00767	1.19991	8.7846
tr|A0A318TBA7|A0A318TBA7_9BRAD	Uncharacterized protein OS	Rhodopseudomonas faecalis OX	0.00425	1.63074	4
tr|A0A318TMY4|A0A318TMY4_9BRAD	Histidine phosphotransferase ChpT OS	Rhodopseudomonas faecalis OX	0.00791	1.14947	5.29859
tr|A0A318T6L8|A0A318T6L8_9BRAD	Glutaredoxin OS	Rhodopseudomonas faecalis OX	0.00817	1.39214	8.56156
tr|A0A318TFG8|A0A318TFG8_9BRAD	Oligoendopeptidase F OS	Rhodopseudomonas faecalis OX	0.00832	1.25501	8.10221
tr|A0A318T9V3|A0A318T9V3_9BRAD	Sulfate thiol esterase SoxB OS	Rhodopseudomonas faecalis OX	0.01998	1.6346	8
tr|A0A318THJ1|A0A318THJ1_9BRAD	PAS/PAC sensor signal transduction histidine kinase OS	Rhodopseudomonas faecalis OX	0.03454	1.64674	1
tr|A0A318TFJ8|A0A318TFJ8_9BRAD	Sulfite reductase (NADPH) hemoprotein beta-component OS	Rhodopseudomonas faecalis OX	0.00855	1.18767	0.0778423
tr|A0A318TBT0|A0A318TBT0_9BRAD	Response regulator receiver domain-containing protein OS	Rhodopseudomonas faecalis OX	0.00876	0.734333	5.58101
tr|A0A318TR99|A0A318TR99_9BRAD	Beta-alanine--pyruvate transaminase OS	Rhodopseudomonas faecalis OX	0.00898	1.40431	8.72584
tr|A0A318TA01|A0A318TA01_9BRAD	Putative ABC transport system ATP-binding protein OS	Rhodopseudomonas faecalis OX	0.00905	1.3768	4.50949
tr|A0A318TCL0|A0A318TCL0_9BRAD	Tryptophan synthase beta chain OS	Rhodopseudomonas faecalis OX	0.00908	1.17919	1.14787
tr|A0A318TCX5|A0A318TCX5_9BRAD	Uncharacterized protein OS	Rhodopseudomonas faecalis OX	0.00911	1.35537	3.49927
tr|A0A318TG11|A0A318TG11_9BRAD	Magnesium chelatase OS	Rhodopseudomonas faecalis OX	0.00622	1.65261	7
tr|A0A318TIS1|A0A318TIS1_9BRAD	50S ribosomal protein L31 OS	Rhodopseudomonas faecalis OX	0.00928	1.20083	7.90194
tr|A0A318T7V9|A0A318T7V9_9BRAD	Flagellar protein FlbT OS	Rhodopseudomonas faecalis OX	0.00933	1.28173	3.12784
tr|A0A318TPV2|A0A318TPV2_9BRAD	Elongation factor Tu OS	Rhodopseudomonas faecalis OX	0.00944	1.13008	3.02362
tr|E6VDK7|E6VDK7_RHOPX	30S ribosomal protein S18 OS	Rhodopseudomonas palustris (strain DX-1) OX	0.00961	1.28171	6.19118
tr|A0A318TQK2|A0A318TQK2_9BRAD	60 kDa chaperonin OS	Rhodopseudomonas faecalis OX	0.00325	1.65347	2
tr|A0A318TY36|A0A318TY36_9BRAD	Localization factor PodJL OS	Rhodopseudomonas faecalis OX	0.00499	1.65758	1
tr|Q07RF1|Q07RF1_RHOP5	RNA polymerase-binding transcription factor DksA OS	Rhodopseudomonas palustris (strain BisA53) OX	0.01776	1.66269	6
tr|A0A318T953|A0A318T953_9BRAD	Peptide chain release factor 3 OS	Rhodopseudomonas faecalis OX	0.01001	1.39731	3.35654
tr|A0A1G7BNV9|A0A1G7BNV9_RHOCA	(R)-ethylmalonyl-CoA mutase OS	Rhodobacter capsulatus OX	0.04635	1.66354	8
tr|A0A318TGY0|A0A318TGY0_9BRAD	Adenine phosphoribosyltransferase OS	Rhodopseudomonas faecalis OX	0.01026	1.09283	7.32773
tr|A0A318TI69|A0A318TI69_9BRAD	Indolepyruvate oxidoreductase subunit IorA OS	Rhodopseudomonas faecalis OX	0.00211	1.66874	4
tr|A0A182D074|A0A182D074_BLAVI	DNA gyrase subunit B OS	Blastochloris viridis OX	0.016	1.6722	3
tr|A0A318TKY7|A0A318TKY7_9BRAD	NTE family protein OS	Rhodopseudomonas faecalis OX	0.00066	1.67599	1
tr|A0A318TPC7|A0A318TPC7_9BRAD	Fe-S cluster biogenesis protein NfuA OS	Rhodopseudomonas faecalis OX	0.01081	1.37476	2.46632
tr|A0A318TNV9|A0A318TNV9_9BRAD	Aspartate/methionine/tyrosine aminotransferase OS	Rhodopseudomonas faecalis OX	0.01116	1.19147	2.50572
tr|A0A318TF39|A0A318TF39_9BRAD	ATP-dependent protease ATPase subunit HslU OS	Rhodopseudomonas faecalis OX	0.01118	1.1503	0.674414
tr|A0A318TM22|A0A318TM22_9BRAD	Octaprenyl-diphosphate synthase OS	Rhodopseudomonas faecalis OX	0.00061	1.67686	0
tr|A0A318TR49|A0A318TR49_9BRAD	Indolepyruvate ferredoxin oxidoreductase beta subunit OS	Rhodopseudomonas faecalis OX	0.00218	1.67986	4
tr|A0A318T6X8|A0A318T6X8_9BRAD	Methylthioribose-1-phosphate isomerase OS	Rhodopseudomonas faecalis OX	0.01066	1.69487	5
tr|A0A318TE38|A0A318TE38_9BRAD	CubicO group peptidase (Beta-lactamase class C family) OS	Rhodopseudomonas faecalis OX	0.0005	1.69567	0
tr|A0A318TEI2|A0A318TEI2_9BRAD	Malonyl CoA-acyl carrier protein transacylase OS	Rhodopseudomonas faecalis OX	0.01148	0.821935	6.10251
tr|A0A318TCB9|A0A318TCB9_9BRAD	Isovaleryl-CoA dehydrogenase OS	Rhodopseudomonas faecalis OX	0.01167	1.18708	2.16281
tr|A0A318TEK6|A0A318TEK6_9BRAD	30S ribosomal protein S5 OS	Rhodopseudomonas faecalis OX	0.01167	1.16162	5.72949
tr|A0A318TA32|A0A318TA32_9BRAD	Protein translocase subunit SecA OS	Rhodopseudomonas faecalis OX	0.01172	1.25254	6.07288
tr|A0A318T995|A0A318T995_9BRAD	30S ribosomal protein S8 OS	Rhodopseudomonas faecalis OX	0.01172	1.12537	0.996836
tr|A0A318TRC0|A0A318TRC0_9BRAD	Uncharacterized protein OS	Rhodopseudomonas faecalis OX	0.01175	1.26281	8.38893
tr|A0A318TE93|A0A318TE93_9BRAD	Uncharacterized protein DUF4167 OS	Rhodopseudomonas faecalis OX	0.00051	1.71619	5
tr|A0A318TBK9|A0A318TBK9_9BRAD	RNA polymerase sigma factor OS	Rhodopseudomonas faecalis OX	0.01183	0.677223	4.97508
tr|A0A1H8T922|A0A1H8T922_9BRAD	Indole-3-glycerol phosphate synthase OS	Rhodopseudomonas pseudopalustris OX	0.01197	1.18633	0.181175
tr|A0A318TFY9|A0A318TFY9_9BRAD	Phytoene desaturase OS	Rhodopseudomonas faecalis OX	0.00158	1.72824	7
tr|A0A318TIJ5|A0A318TIJ5_9BRAD	DNA-directed RNA polymerase subunit beta' OS	Rhodopseudomonas faecalis OX	0.01217	1.28312	0.499458
tr|A0A318TEH6|A0A318TEH6_9BRAD	Replicative DNA helicase OS	Rhodopseudomonas faecalis OX	0.04866	1.72905	1
tr|A0A318TI85|A0A318TI85_9BRAD	Geranylgeranyl reductase OS	Rhodopseudomonas faecalis OX	0.01266	1.39482	4.62427
tr|A0A0V9J8D6|A0A0V9J8D6_9ENTR	Malate dehydrogenase OS	Citrobacter sp. 50677481 OX	0.00131	1.73141	2
tr|A0A318TRD0|A0A318TRD0_9BRAD	10 kDa chaperonin OS	Rhodopseudomonas faecalis OX	0.01278	1.38444	6.17784
tr|A0A318TCN6|A0A318TCN6_9BRAD	Hydroxyneurosporene synthase OS	Rhodopseudomonas faecalis OX	0.04198	1.73398	2
sp|Q20X63|TOLB_RHOPB	Tol-Pal system protein TolB OS	Rhodopseudomonas palustris (strain BisB18) OX	0.0129	1.15569	2.57746
tr|A0A318TFY1|A0A318TFY1_9BRAD	Hydroxymethylbilane synthase OS	Rhodopseudomonas faecalis OX	0.01292	1.07319	7.6389
tr|A0A318TJL3|A0A318TJL3_9BRAD	Methylmalonyl-CoA mutase /heterodimeric methylmalonyl-CoA mutase large subunit OS	Rhodopseudomonas faecalis OX	0.01294	1.37242	4.64487
tr|R8WSC6|R8WSC6_9ENTR	50S ribosomal protein L21 OS	Citrobacter sp. KTE151 OX	0.01706	1.73841	8
tr|A0A318TAK3|A0A318TAK3_9BRAD	50S ribosomal protein L23 OS	Rhodopseudomonas faecalis OX	0.01308	1.1893	7.26516
tr|A0A318U048|A0A318U048_9BRAD	Cystathionine gamma-lyase OS	Rhodopseudomonas faecalis OX	0.03254	1.7428	7
tr|A0A318T8E4|A0A318T8E4_9BRAD	Periplasmic serine endoprotease DegP-like OS	Rhodopseudomonas faecalis OX	0.01366	1.17071	3.2122
tr|A0A318TA21|A0A318TA21_9BRAD	Cytochrome c556 OS	Rhodopseudomonas faecalis OX	0.01374	0.811982	4.43881
tr|R8WL14|R8WL14_9ENTR	30S ribosomal protein S4 OS	Citrobacter sp. KTE151 OX	0.01395	1.44976	4.29237
tr|A0A318TKH3|A0A318TKH3_9BRAD	Acetyl-CoA synthetase OS	Rhodopseudomonas faecalis OX	0.01405	1.38663	0.427247
tr|A0A318TUI1|A0A318TUI1_9BRAD	GTP-binding protein TypA/BipA OS	Rhodopseudomonas faecalis OX	0.01127	1.74369	0
tr|A0A318THK8|A0A318THK8_9BRAD	Uncharacterized protein (TIGR00255 family) OS	Rhodopseudomonas faecalis OX	0.0141	1.10501	3.98041
tr|A0A6B1U121|A0A6B1U121_CITAM	Elongation factor Tu OS	Citrobacter amalonaticus OX	0.01414	1.4197	8.05066
tr|A0A318TCI9|A0A318TCI9_9BRAD	Apolipoprotein A1/A4/E domain-containing protein OS	Rhodopseudomonas faecalis OX	0.01417	1.20496	7.70349
tr|A0A318TBU0|A0A318TBU0_9BRAD	Homoserine kinase OS	Rhodopseudomonas faecalis OX	0.01426	1.3683	5.38252
tr|A0A318TII5|A0A318TII5_9BRAD	50S ribosomal protein L3 OS	Rhodopseudomonas faecalis OX	0.01428	1.12943	0.883232
tr|A0A318T7V2|A0A318T7V2_9BRAD	Histidine kinase OS	Rhodopseudomonas faecalis OX	0.00705	1.74399	6
tr|A0A318TAF9|A0A318TAF9_9BRAD	DNA-directed RNA polymerase subunit beta OS	Rhodopseudomonas faecalis OX	0.01462	1.20596	8.47533
tr|R8WVP4|R8WVP4_9ENTR	Phosphoenolpyruvate-protein phosphotransferase OS	Citrobacter sp. KTE151 OX	0.0232	1.76646	7
tr|A0A318TQH1|A0A318TQH1_9BRAD	PPK2 family polyphosphate:nucleotide phosphotransferase OS	Rhodopseudomonas faecalis OX	0.01485	0.784693	5.52768
tr|A0A318TCA3|A0A318TCA3_9BRAD	Protein GrpE OS	Rhodopseudomonas faecalis OX	0.0149	1.17022	7.48396
tr|A0A318TQ38|A0A318TQ38_9BRAD	Fatty-acyl-CoA synthase OS	Rhodopseudomonas faecalis OX	0.0007	1.76749	2
tr|A0A318T8Y8|A0A318T8Y8_9BRAD	30S ribosomal protein S11 OS	Rhodopseudomonas faecalis OX	0.01577	1.29774	5.92223
tr|A0A318TFZ6|A0A318TFZ6_9BRAD	Chlorophyllide reductase iron protein subunit X OS	Rhodopseudomonas faecalis OX	0.00016	1.76959	5
tr|A0A318T9I3|A0A318T9I3_9BRAD	ATP synthase subunit alpha OS	Rhodopseudomonas faecalis OX	0.01606	1.10497	0.0730019
tr|A0A318TDF7|A0A318TDF7_9BRAD	Ferrochelatase OS	Rhodopseudomonas faecalis OX	0.01629	1.27458	2.7511
tr|A0A318TI74|A0A318TI74_9BRAD	Chlorophyllide reductase subunit Y OS	Rhodopseudomonas faecalis OX	0.00228	1.77273	7
tr|A0A318TJ49|A0A318TJ49_9BRAD	Dihydropteroate synthase OS	Rhodopseudomonas faecalis OX	0.01635	1.15711	1.23952
tr|A0A318TDC2|A0A318TDC2_9BRAD	Acyl-CoA synthetase (AMP-forming)/AMP-acid ligase II OS	Rhodopseudomonas faecalis OX	0.01636	0.872279	5.2768
tr|A0A318TJ28|A0A318TJ28_9BRAD	Ornithine--oxo-acid transaminase OS	Rhodopseudomonas faecalis OX	0.01856	1.77423	1
tr|A0A318T852|A0A318T852_9BRAD	Phosphate regulon transcriptional regulatory protein PhoB OS	Rhodopseudomonas faecalis OX	0.01856	1.78222	4
tr|A0A318U0I7|A0A318U0I7_9BRAD	Uncharacterized protein OS	Rhodopseudomonas faecalis OX	0.01678	0.666976	2.24657
tr|A0A318TQ69|A0A318TQ69_9BRAD	Pyruvate, orthophosphate dikinase OS	Rhodopseudomonas faecalis OX	0.01688	1.10243	8.74108
tr|A0A318TSZ4|A0A318TSZ4_9BRAD	Chlorin reductase subunit Z OS	Rhodopseudomonas faecalis OX	0.00101	1.7984	2
tr|Q07KR3|Q07KR3_RHOP5	Carboxyl transferase OS	Rhodopseudomonas palustris (strain BisA53) OX	0.01715	1.13172	3.15995
tr|A0A318T9L8|A0A318T9L8_9BRAD	50S ribosomal protein L21 OS	Rhodopseudomonas faecalis OX	0.01724	1.41396	0.751357
tr|A0A318TCL8|A0A318TCL8_9BRAD	L-threonine ammonia-lyase OS	Rhodopseudomonas faecalis OX	0.0175	0.752363	7.78817
tr|A0A318TIB1|A0A318TIB1_9BRAD	60 kDa chaperonin OS	Rhodopseudomonas faecalis OX	0.01295	1.79883	7
tr|A0A318THH8|A0A318THH8_9BRAD	Ribosomal silencing factor RsfS OS	Rhodopseudomonas faecalis OX	0.01782	1.21739	5.04861
tr|Q21CH0|Q21CH0_RHOPB	Bacterial translation initiation factor 3 (BIF-3) OS	Rhodopseudomonas palustris (strain BisB18) OX	0.01795	1.47875	3.14857
tr|A0A318TG79|A0A318TG79_9BRAD	Thiazole synthase OS	Rhodopseudomonas faecalis OX	0.00023	1.80054	1
tr|A0A318TPI8|A0A318TPI8_9BRAD	Uncharacterized protein OS	Rhodopseudomonas faecalis OX	0.01824	1.24072	8.1493
tr|A0A318TG34|A0A318TG34_9BRAD	D-methionine transport system substrate-binding protein OS	Rhodopseudomonas faecalis OX	0.0085	1.80538	4
tr|Q07HC5|Q07HC5_RHOP5	Peptidase U32 OS	Rhodopseudomonas palustris (strain BisA53) OX	0.02793	1.81616	8
tr|A0A318TDZ9|A0A318TDZ9_9BRAD	Putative photosynthetic complex assembly protein OS	Rhodopseudomonas faecalis OX	0.02205	1.82434	0
tr|A0A318TBE8|A0A318TBE8_9BRAD	Flagellin OS	Rhodopseudomonas faecalis OX	0.01861	1.36338	2.7025
tr|A0A318T815|A0A318T815_9BRAD	S41A family C-terminal processing peptidase-3 OS	Rhodopseudomonas faecalis OX	0.01965	1.31327	1.56999
tr|A0A318TT13|A0A318TT13_9BRAD	Mg-protoporphyrin IX methyltransferase OS	Rhodopseudomonas faecalis OX	0.00727	1.83827	0
tr|D2TMQ5|D2TMQ5_CITRI	Hydrolase_4 domain-containing protein OS	Citrobacter rodentium (strain ICC168) OX	0.02245	1.84117	2
tr|A0A318TK56|A0A318TK56_9BRAD	2-isopropylmalate synthase OS	Rhodopseudomonas faecalis OX	0.00354	1.84888	1
tr|A0A318TCC2|A0A318TCC2_9BRAD	tRNA (guanine-N(7)-)-methyltransferase OS	Rhodopseudomonas faecalis OX	0.02088	1.43898	3.49936
tr|A0A318THU2|A0A318THU2_9BRAD	Response regulator receiver protein OS	Rhodopseudomonas faecalis OX	0.02666	1.86405	4
tr|A0A318THT2|A0A318THT2_9BRAD	Pseudouridine synthase OS	Rhodopseudomonas faecalis OX	0.02136	1.18281	7.71651
tr|A0A318T9D2|A0A318T9D2_9BRAD	Uncharacterized protein OS	Rhodopseudomonas faecalis OX	0.02148	0.832533	1.05838
tr|A0A318TPT2|A0A318TPT2_9BRAD	Elongation factor G OS	Rhodopseudomonas faecalis OX	0.02165	1.19004	3.84443
tr|A0A318TJ08|A0A318TJ08_9BRAD	50S ribosomal protein L13 OS	Rhodopseudomonas faecalis OX	0.02175	1.15472	7.80038
tr|A0A318TDB6|A0A318TDB6_9BRAD	LuxR family two component transcriptional regulator OS	Rhodopseudomonas faecalis OX	0.02132	1.86982	8
tr|Q6N6I0|Q6N6I0_RHOPA	Nitrogenase iron protein OS	Rhodopseudomonas palustris (strain ATCC BAA-98 / CGA009) OX	0.03643	1.90035	5
tr|A0A318TGT7|A0A318TGT7_9BRAD	L-aspartate oxidase OS	Rhodopseudomonas faecalis OX	0.02228	0.781023	2.20778
tr|A0A318U076|A0A318U076_9BRAD	10 kDa chaperonin OS	Rhodopseudomonas faecalis OX	0.00426	1.90468	3
tr|A0A6N6K5R5|A0A6N6K5R5_9ENTR	50S ribosomal protein L28 OS	Citrobacter pasteurii OX	0.02253	1.44801	3.53368
tr|A0A318TC94|A0A318TC94_9BRAD	Carbonic anhydrase OS	Rhodopseudomonas faecalis OX	0.02258	1.15829	2.58195
tr|A0A318TG77|A0A318TG77_9BRAD	Uncharacterized protein OS	Rhodopseudomonas faecalis OX	0.02301	0.80831	5.39107
tr|A0A318TD31|A0A318TD31_9BRAD	Cytochrome c OS	Rhodopseudomonas faecalis OX	0.02305	0.899574	7.23545
tr|A0A318T7X4|A0A318T7X4_9BRAD	ATP-dependent RNA helicase SUPV3L1/SUV3 OS	Rhodopseudomonas faecalis OX	0.02307	1.18841	8.34277
tr|A0A318TDF0|A0A318TDF0_9BRAD	Farnesyl-diphosphate synthase OS	Rhodopseudomonas faecalis OX	0.02337	1.92446	7
tr|A0A318TAF7|A0A318TAF7_9BRAD	Ribose-phosphate pyrophosphokinase OS	Rhodopseudomonas faecalis OX	0.00398	1.95316	6
tr|A0A318TKQ5|A0A318TKQ5_9BRAD	Uncharacterized protein OS	Rhodopseudomonas faecalis OX	0.02359	0.750388	5.09551
tr|A0A318TCS0|A0A318TCS0_9BRAD	PH (Pleckstrin Homology) domain-containing protein OS	Rhodopseudomonas faecalis OX	0.00513	1.95539	0
tr|A0A318THG8|A0A318THG8_9BRAD	ATP synthase subunit beta OS	Rhodopseudomonas faecalis OX	0.02422	1.14292	4.48631
tr|A0A318T8V3|A0A318T8V3_9BRAD	Fumarate hydratase class I OS	Rhodopseudomonas faecalis OX	0.02436	1.167	2.36304
tr|A0A318TDG3|A0A318TDG3_9BRAD	Bifunctional protein FolD OS	Rhodopseudomonas faecalis OX	0.02443	1.21539	1.22336
tr|A0A318TUD5|A0A318TUD5_9BRAD	Glutamine--tRNA ligase OS	Rhodopseudomonas faecalis OX	0.02446	1.11808	5.4231
tr|A0A318TKZ0|A0A318TKZ0_9BRAD	ATP-dependent Clp protease ATP-binding subunit ClpX OS	Rhodopseudomonas faecalis OX	0.02501	1.19198	0.91881
tr|R8WL17|R8WL17_9ENTR	50S ribosomal protein L15 OS	Citrobacter sp. KTE151 OX	0.02544	1.19993	4.39861
tr|A0A318TAY8|A0A318TAY8_9BRAD	Signal recognition particle protein OS	Rhodopseudomonas faecalis OX	0.02565	1.16062	4.25792
tr|A0A318TEA6|A0A318TEA6_9BRAD	Cytochrome b561 OS	Rhodopseudomonas faecalis OX	0.02566	0.735357	3.48027
tr|R8WKS0|R8WKS0_9ENTR	50S ribosomal protein L33 OS	Citrobacter sp. KTE151 OX	0.00219	1.96756	5
tr|A0A6G8UGI7|A0A6G8UGI7_9ENTR	50S ribosomal protein L3 OS	Citrobacter sp. Y3 OX	0.01075	1.9816	1
tr|A0A318T8F7|A0A318T8F7_9BRAD	Histidinol-phosphate aminotransferase OS	Rhodopseudomonas faecalis OX	0.02651	1.20167	5.11697
tr|A0A0N1C3D1|A0A0N1C3D1_9BRAD	1,4-butanediol diacrylate esterase OS	Rhodopseudomonas sp. AAP120 OX	0.00752	1.99092	7
tr|A0A318TM62|A0A318TM62_9BRAD	Cystathionine beta-lyase OS	Rhodopseudomonas faecalis OX	0.02672	1.08575	4.27703
tr|A0A318TBD8|A0A318TBD8_9BRAD	3-hydroxyacyl-CoA dehydrogenase OS	Rhodopseudomonas faecalis OX	0.02708	1.29675	8.30851
tr|A0A318TGZ3|A0A318TGZ3_9BRAD	UDP-N-acetylglucosamine 1-carboxyvinyltransferase OS	Rhodopseudomonas faecalis OX	4.7428e-05	2.00175	4
tr|A0A318TJ47|A0A318TJ47_9BRAD	Uncharacterized protein OS	Rhodopseudomonas faecalis OX	0.02715	1.27436	1.23948
tr|A0A318TKJ2|A0A318TKJ2_9BRAD	Uncharacterized protein DUF3126 OS	Rhodopseudomonas faecalis OX	0.02724	1.13637	2.10642
tr|A0A318TDR2|A0A318TDR2_9BRAD	Glycogen operon protein OS	Rhodopseudomonas faecalis OX	0.02743	0.714224	4.88218
tr|A0A2V3PLR7|A0A2V3PLR7_9BACT	Uncharacterized protein OS	Dysgonomonas alginatilytica OX	0.02766	1.3512	2.59244
tr|Q07MF9|Q07MF9_RHOP5	Aminotransferase OS	Rhodopseudomonas palustris (strain BisA53) OX	0.00312	2.00532	6
tr|Q137Y7|Q137Y7_RHOPS	Flagellin OS	Rhodopseudomonas palustris (strain BisB5) OX	0.02799	1.48055	6.88707
tr|A0A318TCL3|A0A318TCL3_9BRAD	dTDP-4-amino-4,6-dideoxygalactose transaminase OS	Rhodopseudomonas faecalis OX	0.02861	1.21204	0.180741
tr|A0A318TCF6|A0A318TCF6_9BRAD	Flagellin-like protein (Fragment) OS	Rhodopseudomonas faecalis OX	0.02881	1.4958	7.41615
tr|Q07HS3|Q07HS3_RHOP5	Enoyl-[acyl-carrier-protein] reductase [NADH] OS	Rhodopseudomonas palustris (strain BisA53) OX	0.02907	1.08171	2.61948
tr|F8WW48|F8WW48_9BACT	Inos-1-P_synth domain-containing protein OS	Dysgonomonas mossii DSM 22836 OX	0.02915	0.671569	7.87122
tr|A0A318TDG0|A0A318TDG0_9BRAD	Poly(3-hydroxybutyrate) depolymerase OS	Rhodopseudomonas faecalis OX	0.02922	1.275	0.912495
tr|A0A318TB01|A0A318TB01_9BRAD	Isocitrase OS	Rhodopseudomonas faecalis OX	0.00108	2.03975	6
tr|A0A318TQX2|A0A318TQX2_9BRAD	Uncharacterized protein OS	Rhodopseudomonas faecalis OX	0.02982	1.1548	6.43605
tr|A0A318TFN4|A0A318TFN4_9BRAD	Uncharacterized protein (DUF2147 family) OS	Rhodopseudomonas faecalis OX	0.01641	2.11906	1
tr|A0A318TI96|A0A318TI96_9BRAD	Light-independent protochlorophyllide reductase iron-sulfur ATP-binding protein OS	Rhodopseudomonas faecalis OX	0.00035	2.14331	0
tr|A0A318TG44|A0A318TG44_9BRAD	50S ribosomal protein L35 OS	Rhodopseudomonas faecalis OX	0.00682	2.17613	3
tr|A0A318TKM7|A0A318TKM7_9BRAD	Nitrogen regulatory protein P-II OS	Rhodopseudomonas faecalis OX	0.03104	0.743448	0.38233
tr|A0A318T8X4|A0A318T8X4_9BRAD	Alpha-1,4 glucan phosphorylase OS	Rhodopseudomonas faecalis OX	0.0311	1.19503	1.10311
tr|A0A318TJB3|A0A318TJB3_9BRAD	Phenylacetate-CoA ligase OS	Rhodopseudomonas faecalis OX	0.03127	1.46822	2.34623
tr|A0A323UNF9|A0A323UNF9_RHOPL	Phosphoserine phosphatase SerB OS	Rhodopseudomonas palustris OX	0.03161	1.38841	4.32614
tr|A0A318TDT3|A0A318TDT3_9BRAD	Light-independent protochlorophyllide reductase subunit B OS	Rhodopseudomonas faecalis OX	0.03164	1.29422	2.33593
tr|A0A318TCI8|A0A318TCI8_9BRAD	Ribosomal RNA small subunit methyltransferase G OS	Rhodopseudomonas faecalis OX	0.03182	1.16161	8.65541
tr|E6VMJ0|E6VMJ0_RHOPX	Protein HflC OS	Rhodopseudomonas palustris (strain DX-1) OX	0.00968	2.18454	6
tr|A0A318TN41|A0A318TN41_9BRAD	Geranyl-CoA carboxylase alpha subunit OS	Rhodopseudomonas faecalis OX	0.03217	0.681734	2.75128
tr|A0A318TP93|A0A318TP93_9BRAD	Uncharacterized protein OS	Rhodopseudomonas faecalis OX	0.03212	2.18635	2
tr|A0A318TXK6|A0A318TXK6_9BRAD	Phenylacetate-coenzyme A ligase OS	Rhodopseudomonas faecalis OX	0.00233	2.19379	4
tr|A0A318TBL3|A0A318TBL3_9BRAD	Phosphoglucosamine mutase OS	Rhodopseudomonas faecalis OX	0.00986	2.24523	5
tr|A0A318TSG7|A0A318TSG7_9BRAD	Ribulose-phosphate 3-epimerase OS	Rhodopseudomonas faecalis OX	0.03294	1.22396	1.53114
tr|A0A318TLP5|A0A318TLP5_9BRAD	Uncharacterized protein OS	Rhodopseudomonas faecalis OX	0.03297	0.766407	2.07061
tr|A0A318TG19|A0A318TG19_9BRAD	CheW protein (Fragment) OS	Rhodopseudomonas faecalis OX	0.03308	1.39328	4.48201
tr|A0A318TAA3|A0A318TAA3_9BRAD	Protoporphyrinogen oxidase OS	Rhodopseudomonas faecalis OX	0.03314	1.46034	8.43981
tr|A0A318TA59|A0A318TA59_9BRAD	Ferredoxin--NADP reductase OS	Rhodopseudomonas faecalis OX	0.03315	1.08981	1.86113
tr|A0A4U1JNT2|A0A4U1JNT2_RHOCA	Fumarate hydratase class II OS	Rhodobacter capsulatus OX	0.01521	2.26103	1
tr|A0A318TKA7|A0A318TKA7_9BRAD	Xanthine-guanine phosphoribosyltransferase OS	Rhodopseudomonas faecalis OX	0.03387	0.66101	7.6768
tr|A0A318TV48|A0A318TV48_9BRAD	Iron-regulated ABC transporter permease protein SufD OS	Rhodopseudomonas faecalis OX	0.0344	1.37159	4.17738
tr|A0A6G8UHP6|A0A6G8UHP6_9ENTR	Aconitate hydratase B OS	Citrobacter sp. Y3 OX	0.00553	2.27282	6
tr|A0A318TGF3|A0A318TGF3_9BRAD	Lectin-like protein BA14k OS	Rhodopseudomonas faecalis OX	0.03462	0.700243	1.75256
tr|A0A318TE73|A0A318TE73_9BRAD	3-isopropylmalate dehydratase small subunit OS	Rhodopseudomonas faecalis OX	0.03482	1.09152	7.57439
tr|A0A318TD64|A0A318TD64_9BRAD	Coproporphyrinogen-III oxidase OS	Rhodopseudomonas faecalis OX	0.00025	2.31449	0
tr|A0A318U0E2|A0A318U0E2_9BRAD	Enoyl-CoA hydratase OS	Rhodopseudomonas faecalis OX	0.03499	1.18889	4.80853
tr|A0A318T840|A0A318T840_9BRAD	Chaperone protein HtpG OS	Rhodopseudomonas faecalis OX	0.03528	1.33835	7.56553
tr|A0A318T8U1|A0A318T8U1_9BRAD	AsnC family transcriptional regulator OS	Rhodopseudomonas faecalis OX	0.03548	0.851181	1.94234
tr|A0A318TA54|A0A318TA54_9BRAD	4-hydroxy-3-methylbut-2-enyl diphosphate reductase OS	Rhodopseudomonas faecalis OX	0.00394	2.32603	1
tr|A0A318TFS6|A0A318TFS6_9BRAD	ATP-sulfurylase small subunit OS	Rhodopseudomonas faecalis OX	0.0001	2.36783	0
tr|A0A318TKR2|A0A318TKR2_9BRAD	Citrate synthase OS	Rhodopseudomonas faecalis OX	0.00545	2.52762	4
tr|A0A318TEY1|A0A318TEY1_9BRAD	Elongation factor P OS	Rhodopseudomonas faecalis OX	0.0371	1.31914	1.57726
tr|A0A318TAG2|A0A318TAG2_9BRAD	Phenylalanine--tRNA ligase beta subunit OS	Rhodopseudomonas faecalis OX	0.03744	1.1808	7.33199
tr|A0A318TMI2|A0A318TMI2_9BRAD	Phospho-2-dehydro-3-deoxyheptonate aldolase OS	Rhodopseudomonas faecalis OX	0.01254	2.61854	0
tr|A0A318TRE0|A0A318TRE0_9BRAD	Elongation factor 4 OS	Rhodopseudomonas faecalis OX	0.03857	1.3627	5.81765
tr|Q07QW2|Q07QW2_RHOP5	O-acetylhomoserine/O-acetylserine sulfhydrylase OS	Rhodopseudomonas palustris (strain BisA53) OX	0.00124	2.67453	6
tr|Q07LE5|Q07LE5_RHOP5	3-oxoacyl-[acyl-carrier-protein] reductase OS	Rhodopseudomonas palustris (strain BisA53) OX	0.03218	2.77414	4
tr|A0A318TJM0|A0A318TJM0_9BRAD	PEGA domain-containing protein OS	Rhodopseudomonas faecalis OX	0.03942	1.23651	0.996926
tr|F5J2K9|F5J2K9_9BACT	Uncharacterized protein OS	Dysgonomonas gadei ATCC BAA-286 OX	0.03763	2.78186	2
tr|R8WVA4|R8WVA4_9ENTR	Glucose-specific phosphotransferase enzyme IIA component OS	Citrobacter sp. KTE151 OX	0.03963	1.342	1.63026
tr|A0A318TD98|A0A318TD98_9BRAD	UPF0335 protein BJ122_11196 OS	Rhodopseudomonas faecalis OX	0.03986	1.37565	1.23004
tr|A0A318U0B4|A0A318U0B4_9BRAD	Threonine--tRNA ligase OS	Rhodopseudomonas faecalis OX	0.04021	1.15997	7.75514
tr|A0A318TVT3|A0A318TVT3_9BRAD	DNA topoisomerase 4 subunit A OS	Rhodopseudomonas faecalis OX	0.04022	1.13228	0.611883
tr|A0A318TDL6|A0A318TDL6_9BRAD	Rhodanese-related sulfurtransferase OS	Rhodopseudomonas faecalis OX	0.04035	0.807026	5.05452
tr|A0A6L5EB97|A0A6L5EB97_9ENTR	Aminotransferase class I/II-fold pyridoxal phosphate-dependent enzyme OS	Citrobacter sp. NMI7905_11 OX	0.04062	1.41571	4.52904
tr|A0A318TA09|A0A318TA09_9BRAD	Succinate dehydrogenase hydrophobic membrane anchor subunit OS	Rhodopseudomonas faecalis OX	0.04094	1.29452	7.5393
tr|A0A318TNP4|A0A318TNP4_9BRAD	Pyruvate dehydrogenase E1 component subunit beta OS	Rhodopseudomonas faecalis OX	0.04095	0.857285	4.39631
tr|A0A318TA82|A0A318TA82_9BRAD	O-acetylhomoserine sulfhydrylase OS	Rhodopseudomonas faecalis OX	0.00926	3.01966	5
tr|A0A318THL6|A0A318THL6_9BRAD	30S ribosomal protein S21 OS	Rhodopseudomonas faecalis OX	0.04124	0.673417	7.6583
tr|A0A318TIG4|A0A318TIG4_9BRAD	Glutamate dehydrogenase OS	Rhodopseudomonas faecalis OX	0.0416	1.10961	8.57673
tr|A0A318TIW2|A0A318TIW2_9BRAD	RNA polymerase sigma factor RpoD OS	Rhodopseudomonas faecalis OX	0.04191	1.21507	8.17035
tr|A0A318TKX9|A0A318TKX9_9BRAD	Ribosome-recycling factor OS	Rhodopseudomonas faecalis OX	0.04198	1.14452	7.26174
tr|A0A318TP00|A0A318TP00_9BRAD	Nicotinate-nucleotide--dimethylbenzimidazole phosphoribosyltransferase OS	Rhodopseudomonas faecalis OX	0.00012	3.08947	7
tr|A0A318TK80|A0A318TK80_9BRAD	Uncharacterized protein OS	Rhodopseudomonas faecalis OX	0.04246	1.281	2.23685
tr|A0A318TDX1|A0A318TDX1_9BRAD	Photosynthetic reaction center L subunit OS	Rhodopseudomonas faecalis OX	0.04254	0.746991	7.21171
tr|A0A212PYL2|A0A212PYL2_RHOAC	Cystathionine gamma-lyase OS	Rhodoblastus acidophilus OX	0.04796	3.21108	6
tr|R8WLW3|R8WLW3_9ENTR	50S ribosomal protein L17 OS	Citrobacter sp. KTE151 OX	0.04304	1.30151	6.63906
tr|A0A4U1JPD9|A0A4U1JPD9_RHOCA	Methylmalonyl-CoA mutase OS	Rhodobacter capsulatus OX	0.04657	3.35497	2
tr|A0A318TTB8|A0A318TTB8_9BRAD	RND family efflux transporter MFP subunit OS	Rhodopseudomonas faecalis OX	0.04366	0.808738	3.19083
tr|F8WVT7|F8WVT7_9BACT	30S ribosomal protein S14 OS	Dysgonomonas mossii DSM 22836 OX	0.04366	1.47361	7.83461
tr|A0A318T839|A0A318T839_9BRAD	Phosphoribosylaminoimidazole-succinocarboxamide synthase OS	Rhodopseudomonas faecalis OX	0.04465	1.24237	0.633165
tr|A0A318TAX3|A0A318TAX3_9BRAD	Putative cold-shock DNA-binding protein OS	Rhodopseudomonas faecalis OX	0.00384	3.58188	1
tr|A0A318TCH4|A0A318TCH4_9BRAD	Flagellar hook-associated protein 1 OS	Rhodopseudomonas faecalis OX	0.04636	1.29261	7.92634
tr|A0A318THQ8|A0A318THQ8_9BRAD	Uncharacterized protein DUF2849 OS	Rhodopseudomonas faecalis OX	0.04642	1.19843	5.80648
tr|A0A318TAE8|A0A318TAE8_9BRAD	Acyl dehydratase OS	Rhodopseudomonas faecalis OX	0.04644	1.18855	7.30234
tr|A0A212R3E2|A0A212R3E2_RHOAC	O-acetylhomoserine sulfhydrylase OS	Rhodoblastus acidophilus OX	0.01995	3.61234	4
tr|A0A318TUC7|A0A318TUC7_9BRAD	1-deoxy-D-xylulose 5-phosphate reductoisomerase OS	Rhodopseudomonas faecalis OX	0.04664	1.21722	7.9216
tr|A0A318T909|A0A318T909_9BRAD	50S ribosomal protein L2 OS	Rhodopseudomonas faecalis OX	0.04669	1.09365	2.17419
tr|A0A318T932|A0A318T932_9BRAD	3-oxoacyl-[acyl-carrier protein] reductase OS	Rhodopseudomonas faecalis OX	0.0467	1.27307	2.71912
tr|A0A318TKF3|A0A318TKF3_9BRAD	Uncharacterized protein OS	Rhodopseudomonas faecalis OX	0.03879	4.13434	7
tr|A0A318TB82|A0A318TB82_9BRAD	Thiosulfate-binding protein SoxY OS	Rhodopseudomonas faecalis OX	0.04709	0.742192	5.57652
tr|A0A318TFR3|A0A318TFR3_9BRAD	Acyl-CoA synthetase (AMP-forming)/AMP-acid ligase II OS	Rhodopseudomonas faecalis OX	0.04732	1.32555	6.43539
tr|A0A318TLP4|A0A318TLP4_9BRAD	D-aminopeptidase OS	Rhodopseudomonas faecalis OX	0.04782	0.838613	8.2635
tr|A0A2X2W9P0|A0A2X2W9P0_CITKO	Multifunctional fusion protein OS	Citrobacter koseri OX	0.00271	5.17576	0
tr|A0A318T8L9|A0A318T8L9_9BRAD	Bifunctional purine biosynthesis protein PurH OS	Rhodopseudomonas faecalis OX	0.04819	1.092	6.11083
tr|A0A318TD83|A0A318TD83_9BRAD	Cobaltochelatase CobS subunit OS	Rhodopseudomonas faecalis OX	0.04828	1.24815	7.53653
tr|A0A318T9Z5|A0A318T9Z5_9BRAD	tRNA pseudouridine synthase B OS	Rhodopseudomonas faecalis OX	1.1171e-06	5.9937	5
tr|A0A318TLN8|A0A318TLN8_9BRAD	Amino acid ABC transporter substrate-binding protein (PAAT family) OS	Rhodopseudomonas faecalis OX	0.04845	0.897358	1.96611
tr|A0A2S4S400|A0A2S4S400_CITAM	NADP-dependent oxaloacetate-decarboxylating malate dehydrogenase OS	Citrobacter amalonaticus OX	0.0483	8.17822	6
tr|A0A318TF29|A0A318TF29_9BRAD	Transcription termination factor Rho OS	Rhodopseudomonas faecalis OX	0.04888	1.12677	2.54436
tr|A0A2R4GY90|A0A2R4GY90_RHOPL	Protein RecA OS	Rhodopseudomonas palustris OX	0.03076	16.6082	3
tr|A0A318TKZ9|A0A318TKZ9_9BRAD	Lectin-like protein BA14k OS	Rhodopseudomonas faecalis OX	0.04905	0.696454	0.480901
tr|A0A318TNH2|A0A318TNH2_9BRAD	Glutamine synthetase OS	Rhodopseudomonas faecalis OX	0.0492	0.917911	0.604682
tr|A0A318THY5|A0A318THY5_9BRAD	Ribonuclease D OS	Rhodopseudomonas faecalis OX	5.9176e-05	26.0076	6
tr|A0A318TID6|A0A318TID6_9BRAD	Ribosome-binding ATPase YchF OS	Rhodopseudomonas faecalis OX	0.04948	1.20696	1.99277
tr|A0A318TE10|A0A318TE10_9BRAD	Agarase OS	Rhodopseudomonas faecalis OX	0.04974	1.23806	0.0561285
tr|R8WIK1|R8WIK1_9ENTR	50S ribosomal protein L1 OS	Citrobacter sp. KTE151 OX	0.04998	1.49473	8.20236
tr|A0A318THE5|A0A318THE5_9BRAD	ATP-dependent Clp protease ATP-binding subunit ClpA OS	Rhodopseudomonas faecalis OX	0.05106	1.70178	4.32009
tr|A0A6B3RMG3|A0A6B3RMG3_9RHOB	Phasin OS	Rhodobacter sp. ETT8 OX	0.05119	0.367435	2.30678
tr|A0A318TKU4|A0A318TKU4_9BRAD	Protease HtpX homolog OS	Rhodopseudomonas faecalis OX	0.05141	1.35195	1.02066
tr|A0A318TFY2|A0A318TFY2_9BRAD	Uncharacterized protein OS	Rhodopseudomonas faecalis OX	0.05145	1.10903	6.13439
tr|A0A318TAQ9|A0A318TAQ9_9BRAD	Uncharacterized protein YjbJ (UPF0337 family) OS	Rhodopseudomonas faecalis OX	0.05254	0.595332	5.93112
tr|A0A318TLX9|A0A318TLX9_9BRAD	Citrate synthase OS	Rhodopseudomonas faecalis OX	0.05306	1.18292	1.32603
tr|A0A318T7B7|A0A318T7B7_9BRAD	UDP-glucose 6-dehydrogenase OS	Rhodopseudomonas faecalis OX	0.05365	1.3272	2.16913
tr|A0A318TCC6|A0A318TCC6_9BRAD	Acetyl-coenzyme A carboxylase carboxyl transferase subunit beta OS	Rhodopseudomonas faecalis OX	0.05443	1.19836	5.6831
tr|A0A318THV9|A0A318THV9_9BRAD	50S ribosomal protein L27 OS	Rhodopseudomonas faecalis OX	0.05493	1.23177	4.25553
tr|A0A318T6H3|A0A318T6H3_9BRAD	Imidazole glycerol phosphate synthase subunit HisF OS	Rhodopseudomonas faecalis OX	0.05534	0.757853	0.789718
tr|A0A318U0T6|A0A318U0T6_9BRAD	Beta-N-acetylhexosaminidase OS	Rhodopseudomonas faecalis OX	0.05543	1.12049	4.60669
tr|A0A318TI32|A0A318TI32_9BRAD	Ribosome-binding factor A OS	Rhodopseudomonas faecalis OX	0.05562	1.16985	7.41071
tr|A0A318TN51|A0A318TN51_9BRAD	30S ribosomal protein S20 OS	Rhodopseudomonas faecalis OX	0.05602	1.34714	0.680464
tr|A0A318TI25|A0A318TI25_9BRAD	Succinyl-CoA:acetate CoA-transferase OS	Rhodopseudomonas faecalis OX	0.05603	1.36331	3.88172
tr|A0A318TGU1|A0A318TGU1_9BRAD	Pimeloyl-CoA dehydrogenase small subunit OS	Rhodopseudomonas faecalis OX	0.05612	1.07929	3.35914
tr|A0A318TA40|A0A318TA40_9BRAD	GTPase HflX OS	Rhodopseudomonas faecalis OX	0.05615	1.42246	0.695199
tr|A0A318TE01|A0A318TE01_9BRAD	BON domain-containing protein OS	Rhodopseudomonas faecalis OX	0.05623	1.69227	5.1745
tr|A0A2T4JA66|A0A2T4JA66_RHOBL	Branched-chain amino acid ABC transporter substrate-binding protein OS	Rhodobacter blasticus DSM 2131 OX	0.05629	0.496572	5.70983
tr|A0A318T900|A0A318T900_9BRAD	Ornithine carbamoyltransferase OS	Rhodopseudomonas faecalis OX	0.05637	1.11062	0.164471
tr|A0A318TMB6|A0A318TMB6_9BRAD	NAD(P)-dependent dehydrogenase (Short-subunit alcohol dehydrogenase family) OS	Rhodopseudomonas faecalis OX	0.05749	0.502361	8.17356
tr|A0A318T7W7|A0A318T7W7_9BRAD	Uncharacterized protein YidB (DUF937 family) OS	Rhodopseudomonas faecalis OX	0.05795	0.775499	3.53724
tr|A0A318TD30|A0A318TD30_9BRAD	Phosphoribosylamine--glycine ligase OS	Rhodopseudomonas faecalis OX	0.05802	1.18149	3.06761
tr|D2TN32|D2TN32_CITRI	30S ribosomal protein S6 OS	Citrobacter rodentium (strain ICC168) OX	0.05864	1.35291	0.277665
tr|A0A212I566|A0A212I566_9ENTR	Multifunctional fusion protein OS	uncultured Citrobacter sp. OX	0.05885	1.43197	4.89883
tr|A0A318TF11|A0A318TF11_9BRAD	DNA polymerase III delta subunit OS	Rhodopseudomonas faecalis OX	0.05887	1.46157	5.56658
tr|A0A318TXV7|A0A318TXV7_9BRAD	D-methionine transport system substrate-binding protein OS	Rhodopseudomonas faecalis OX	0.05899	1.48258	3.43919
tr|A0A318T6U8|A0A318T6U8_9BRAD	Xanthine dehydrogenase molybdenum binding subunit apoprotein OS	Rhodopseudomonas faecalis OX	0.05957	1.30043	5.79984
sp|Q07KP3|RL17_RHOP5	50S ribosomal protein L17 OS	Rhodopseudomonas palustris (strain BisA53) OX	0.05986	1.12583	3.1888
tr|Q2J0F7|Q2J0F7_RHOP2	Glutathione-dependent peroxiredoxin OS	Rhodopseudomonas palustris (strain HaA2) OX	0.06006	1.15187	5.1445
tr|A0A1M4TAR8|A0A1M4TAR8_9BACT	Elongation factor Tu OS	Dysgonomonas macrotermitis OX	0.06011	2.45723	7.31339
tr|A0A4U1JM75|A0A4U1JM75_RHOCA	Phosphatidylserine decarboxylase proenzyme OS	Rhodobacter capsulatus OX	0.06019	0.446182	1.90396
tr|A0A318TFF5|A0A318TFF5_9BRAD	Endolytic murein transglycosylase OS	Rhodopseudomonas faecalis OX	0.0602	1.41319	2.80436
tr|A0A6N6K5A3|A0A6N6K5A3_9ENTR	Purine nucleoside phosphoramidase OS	Citrobacter pasteurii OX	0.06033	0.646192	7.64065
tr|A0A318TFG5|A0A318TFG5_9BRAD	NitT/TauT family transport system substrate-binding protein OS	Rhodopseudomonas faecalis OX	0.06182	0.669895	0.474335
tr|A0A318TV22|A0A318TV22_9BRAD	Uncharacterized protein OS	Rhodopseudomonas faecalis OX	0.06216	0.646357	7.30668
tr|A0A6G8UHD8|A0A6G8UHD8_9ENTR	Transaldolase OS	Citrobacter sp. Y3 OX	0.06221	1.84294	7.09925
tr|A0A318TIL2|A0A318TIL2_9BRAD	ATP-dependent zinc metalloprotease FtsH OS	Rhodopseudomonas faecalis OX	0.06222	1.19886	4.27261
tr|A0A318TU15|A0A318TU15_9BRAD	Precorrin-2/cobalt-factor-2 C20-methyltransferase OS	Rhodopseudomonas faecalis OX	0.06277	1.14108	3.44728
tr|A0A318TBD4|A0A318TBD4_9BRAD	Cytidylate kinase OS	Rhodopseudomonas faecalis OX	0.06289	1.16141	4.28184
tr|A0A318TM09|A0A318TM09_9BRAD	7,8-dihydroneopterin aldolase OS	Rhodopseudomonas faecalis OX	0.06376	0.44791	0.671435
tr|A0A212IZX2|A0A212IZX2_9BACT	Uncharacterized protein OS	uncultured Dysgonomonas sp. OX	0.06461	0.821417	1.36122
tr|A0A318TL63|A0A318TL63_9BRAD	Uncharacterized protein OS	Rhodopseudomonas faecalis OX	0.06467	1.26159	1.42848
tr|A0A318TQ94|A0A318TQ94_9BRAD	Chromosome partition protein Smc OS	Rhodopseudomonas faecalis OX	0.06514	1.92436	2.63268
tr|O68070|O68070_RHOCA	MaoC-like domain-containing protein OS	Rhodobacter capsulatus OX	0.06517	0.506101	5.60277
tr|A0A318T944|A0A318T944_9BRAD	Putative dehydrogenase OS	Rhodopseudomonas faecalis OX	0.06577	1.59337	0.965477
tr|A0A318TCM3|A0A318TCM3_9BRAD	Uncharacterized protein OS	Rhodopseudomonas faecalis OX	0.06617	0.597362	7.03985
tr|R8X2U4|R8X2U4_9ENTR	30S ribosomal protein S20 OS	Citrobacter sp. KTE151 OX	0.06682	1.48555	2.07455
tr|A0A318U0L4|A0A318U0L4_9BRAD	Methylmalonyl-CoA epimerase /ethylmalonyl-CoA epimerase OS	Rhodopseudomonas faecalis OX	0.06689	1.23513	6.9143
tr|A0A318TQI5|A0A318TQI5_9BRAD	Cytochrome c553 OS	Rhodopseudomonas faecalis OX	0.06759	0.515148	4.54565
tr|A0A318T966|A0A318T966_9BRAD	ATP synthase gamma chain OS	Rhodopseudomonas faecalis OX	0.06775	1.25194	3.51778
tr|R8WR32|R8WR32_9ENTR	DNA-directed RNA polymerase subunit alpha OS	Citrobacter sp. KTE151 OX	0.06775	1.50749	7.83573
tr|A0A318TJ59|A0A318TJ59_9BRAD	Chemotaxis protein CheZ OS	Rhodopseudomonas faecalis OX	0.0681	1.21261	4.15391
tr|A0A318TF30|A0A318TF30_9BRAD	Ribonuclease E OS	Rhodopseudomonas faecalis OX	0.06834	1.15595	2.85659
tr|A0A318TAF1|A0A318TAF1_9BRAD	Periplasmic serine endoprotease DegP-like OS	Rhodopseudomonas faecalis OX	0.06841	1.16336	2.21435
tr|A0A318TGA6|A0A318TGA6_9BRAD	Amino acid/amide ABC transporter substrate-binding protein (HAAT family) OS	Rhodopseudomonas faecalis OX	0.06853	0.457368	3.95949
tr|A0A318TPC0|A0A318TPC0_9BRAD	Fatty-acyl-CoA synthase OS	Rhodopseudomonas faecalis OX	0.06877	1.22145	1.3268
tr|A0A6L5E7L5|A0A6L5E7L5_9ENTR	Peroxiredoxin C OS	Citrobacter sp. NMI7905_11 OX	0.06939	1.46249	0.189587
tr|A0A318TGH8|A0A318TGH8_9BRAD	Cytochrome c553 OS	Rhodopseudomonas faecalis OX	0.06958	1.90182	8.90853
tr|A0A318TBC4|A0A318TBC4_9BRAD	Thioredoxin OS	Rhodopseudomonas faecalis OX	0.06992	1.43363	7.13079
tr|D2TN84|D2TN84_CITRI	30S ribosomal protein S5 OS	Citrobacter rodentium (strain ICC168) OX	0.07015	1.25155	1.14531
tr|A0A318TZ09|A0A318TZ09_9BRAD	Hopanoid biosynthesis associated radical SAM protein HpnH OS	Rhodopseudomonas faecalis OX	0.07057	1.43711	5.66757
tr|A0A318T729|A0A318T729_9BRAD	Carbon-monoxide dehydrogenase small subunit OS	Rhodopseudomonas faecalis OX	0.07061	1.32914	4.05702
tr|D2TTB5|D2TTB5_CITRI	Thioredoxin peroxidase OS	Citrobacter rodentium (strain ICC168) OX	0.07212	1.34671	7.13133
tr|A0A318TBS9|A0A318TBS9_9BRAD	Phosphoribosyl pyrophosphate synthase OS	Rhodopseudomonas faecalis OX	0.07231	0.60338	2.31624
tr|R8WR49|R8WR49_9ENTR	50S ribosomal protein L22 OS	Citrobacter sp. KTE151 OX	0.07239	1.2799	8.49208
tr|A0A318TKG6|A0A318TKG6_9BRAD	Phosphotransferase IIA-like nitrogen-regulatory protein PtsN OS	Rhodopseudomonas faecalis OX	0.0726	0.70982	6.83599
tr|A0A318THH9|A0A318THH9_9BRAD	Uncharacterized protein OS	Rhodopseudomonas faecalis OX	0.0728	0.853418	3.87634
tr|A0A318TBZ1|A0A318TBZ1_9BRAD	Acetolactate synthase OS	Rhodopseudomonas faecalis OX	0.07298	1.24169	7.75368
tr|A0A318TNQ3|A0A318TNQ3_9BRAD	3-methylcrotonyl-CoA carboxylase beta subunit OS	Rhodopseudomonas faecalis OX	0.07448	1.10415	4.39035
tr|Q07TR3|Q07TR3_RHOP5	UPF0301 protein RPE_0714 OS	Rhodopseudomonas palustris (strain BisA53) OX	0.07449	1.27722	8.42029
tr|A0A318T7X2|A0A318T7X2_9BRAD	Protein-glutamate methylesterase/protein-glutamine glutaminase OS	Rhodopseudomonas faecalis OX	0.07474	1.59109	6.74694
tr|A0A318TIA4|A0A318TIA4_9BRAD	Ribulose bisphosphate carboxylase large chain OS	Rhodopseudomonas faecalis OX	0.07488	1.20416	6.6984
tr|A0A0N8VEZ1|A0A0N8VEZ1_RHOCA	50S ribosomal protein L3 OS	Rhodobacter capsulatus OX	0.07491	2.49494	0.363724
tr|A0A2R4GZB1|A0A2R4GZB1_RHOPL	O-acetylhomoserine sulfhydrylase / O-succinylhomoserine sulfhydrylase OS	Rhodopseudomonas palustris OX	0.07519	1.37544	0.563594
tr|A0A318T8E7|A0A318T8E7_9BRAD	Uncharacterized protein OS	Rhodopseudomonas faecalis OX	0.07534	1.57564	4.05675
tr|A0A318T6N1|A0A318T6N1_9BRAD	Phosphoribosylformylglycinamidine synthase subunit PurS OS	Rhodopseudomonas faecalis OX	0.07546	1.0766	3.52136
tr|A0A318TL56|A0A318TL56_9BRAD	Uncharacterized protein OS	Rhodopseudomonas faecalis OX	0.07569	1.10623	7.74682
tr|D2TT83|D2TT83_CITRI	Ethanolamine utilization protein OS	Citrobacter rodentium (strain ICC168) OX	0.0763	0.308373	6.83933
tr|A0A318T865|A0A318T865_9BRAD	Anti-sigma-K factor rskA OS	Rhodopseudomonas faecalis OX	0.07652	1.88738	6.53103
tr|A0A318TDE0|A0A318TDE0_9BRAD	5-aminolevulinate synthase OS	Rhodopseudomonas faecalis OX	0.07666	1.71187	7.4891
tr|A0A318TRQ0|A0A318TRQ0_9BRAD	UTP--glucose-1-phosphate uridylyltransferase OS	Rhodopseudomonas faecalis OX	0.07708	1.11285	5.44452
tr|A0A318TUH3|A0A318TUH3_9BRAD	Serine--tRNA ligase OS	Rhodopseudomonas faecalis OX	0.0771	1.10195	3.71427
tr|E6VBV1|E6VBV1_RHOPX	30S ribosomal protein S12 OS	Rhodopseudomonas palustris (strain DX-1) OX	0.07764	1.37966	1.84021
tr|A0A318TFT6|A0A318TFT6_9BRAD	GTP pyrophosphokinase rsh OS	Rhodopseudomonas faecalis OX	0.07797	1.17442	8.2661
tr|F8WW86|F8WW86_9BACT	Uncharacterized protein OS	Dysgonomonas mossii DSM 22836 OX	0.07865	1.1658	5.83645
tr|A0A318TGP4|A0A318TGP4_9BRAD	Crp/Fnr family transcriptional regulator OS	Rhodopseudomonas faecalis OX	0.07908	0.846833	7.7054
tr|A0A318TIA8|A0A318TIA8_9BRAD	Glutamate synthase (NADH) large subunit OS	Rhodopseudomonas faecalis OX	0.07917	1.13489	2.09078
tr|A0A318TN54|A0A318TN54_9BRAD	Uncharacterized protein OS	Rhodopseudomonas faecalis OX	0.07955	1.24043	7.56668
tr|A0A318T7L0|A0A318T7L0_9BRAD	Methyl-accepting chemotaxis protein OS	Rhodopseudomonas faecalis OX	0.08053	1.6362	5.07411
tr|A0A318TDA9|A0A318TDA9_9BRAD	UDP-glucuronate decarboxylase OS	Rhodopseudomonas faecalis OX	0.08086	1.25568	1.19879
tr|A0A318T9R0|A0A318T9R0_9BRAD	Cell division protein FtsZ OS	Rhodopseudomonas faecalis OX	0.08159	1.36742	8.45882
tr|A0A318TL57|A0A318TL57_9BRAD	Glutamate--cysteine ligase OS	Rhodopseudomonas faecalis OX	0.08197	1.46116	2.74308
tr|A0A2T5KCB9|A0A2T5KCB9_9RHOB	60 kDa chaperonin OS	Rhodobacter azotoformans OX	0.08212	0.499554	1.20797
tr|A0A2T4J6N8|A0A2T4J6N8_RHOBL	Phasin OS	Rhodobacter blasticus DSM 2131 OX	0.08241	0.404578	6.70518
tr|A0A212IZE0|A0A212IZE0_9BACT	SusD family protein OS	uncultured Dysgonomonas sp. OX	0.08264	0.52975	7.75121
tr|A0A318TB17|A0A318TB17_9BRAD	Acyl-CoA dehydrogenase OS	Rhodopseudomonas faecalis OX	0.08287	1.12732	1.07128
tr|A0A318T8H9|A0A318T8H9_9BRAD	Succinate dehydrogenase flavoprotein subunit OS	Rhodopseudomonas faecalis OX	0.08318	1.11278	1.31233
tr|A0A318TLG0|A0A318TLG0_9BRAD	Glutamate--tRNA ligase OS	Rhodopseudomonas faecalis OX	0.0838	1.09895	2.12229
tr|A0A318TJV5|A0A318TJV5_9BRAD	Ribonuclease PH OS	Rhodopseudomonas faecalis OX	0.08429	1.17187	7.2436
tr|A0A318T7Z1|A0A318T7Z1_9BRAD	1-(5-phosphoribosyl)-5-[(5-phosphoribosylamino)methylideneamino] imidazole-4-carboxamide isomerase OS	Rhodopseudomonas faecalis OX	0.08565	1.2776	8.26883
tr|A0A318TPN1|A0A318TPN1_9BRAD	Enoyl-CoA hydratase/carnithine racemase OS	Rhodopseudomonas faecalis OX	0.08585	0.380471	7.45487
tr|A0A318TNG0|A0A318TNG0_9BRAD	Vitamin B12-dependent ribonucleotide reductase OS	Rhodopseudomonas faecalis OX	0.08606	1.29598	7.8209
tr|A0A318TIV3|A0A318TIV3_9BRAD	Riboflavin biosynthesis protein RibD OS	Rhodopseudomonas faecalis OX	0.08618	1.14683	8.55945
tr|A0A318TR64|A0A318TR64_9BRAD	Sporulation related protein OS	Rhodopseudomonas faecalis OX	0.08625	0.828334	3.55829
tr|A0A6L5E2A5|A0A6L5E2A5_9ENTR	ADP-forming succinate--CoA ligase subunit beta OS	Citrobacter sp. NMI7905_11 OX	0.08644	1.64874	4.0034
tr|A0A318TCP0|A0A318TCP0_9BRAD	ATPase subunit of ABC transporter with duplicated ATPase domains OS	Rhodopseudomonas faecalis OX	0.08678	1.47191	5.97274
tr|A0A318T842|A0A318T842_9BRAD	UPF0753 protein BJ122_1253 OS	Rhodopseudomonas faecalis OX	0.08683	0.736564	4.38876
tr|A0A318TC02|A0A318TC02_9BRAD	DNA repair protein RecN OS	Rhodopseudomonas faecalis OX	0.08756	1.4352	0.931875
tr|A0A318TN75|A0A318TN75_9BRAD	Flp pilus assembly protein TadG OS	Rhodopseudomonas faecalis OX	0.0879	0.863078	5.64662
tr|A0A318TKQ3|A0A318TKQ3_9BRAD	Protein tyrosine/serine phosphatase OS	Rhodopseudomonas faecalis OX	0.08793	2.84208	6.33709
tr|A0A318TF49|A0A318TF49_9BRAD	Lysyl-tRNA synthetase class 2 OS	Rhodopseudomonas faecalis OX	0.08812	0.739067	5.51224
tr|A0A318TI59|A0A318TI59_9BRAD	Pyruvate-ferredoxin/flavodoxin oxidoreductase OS	Rhodopseudomonas faecalis OX	0.0883	1.18271	4.91636
tr|A0A318TE72|A0A318TE72_9BRAD	Polyribonucleotide nucleotidyltransferase OS	Rhodopseudomonas faecalis OX	0.08841	1.12363	1.11575
tr|A0A318TC20|A0A318TC20_9BRAD	3-isopropylmalate dehydratase large subunit OS	Rhodopseudomonas faecalis OX	0.0892	1.06642	6.60271
tr|A0A318TG68|A0A318TG68_9BRAD	Glycine cleavage system H protein OS	Rhodopseudomonas faecalis OX	0.0892	1.25543	0.535713
tr|R8WVE3|R8WVE3_9ENTR	Phosphocarrier protein HPr OS	Citrobacter sp. KTE151 OX	0.08929	1.45854	7.77225
tr|D2TTH5|D2TTH5_CITRI	50S ribosomal protein L11 OS	Citrobacter rodentium (strain ICC168) OX	0.09037	1.48386	6.0073
tr|A0A318TB18|A0A318TB18_9BRAD	Glutathione synthetase OS	Rhodopseudomonas faecalis OX	0.09048	1.10562	4.36202
tr|A0A318TGV9|A0A318TGV9_9BRAD	Uncharacterized protein DUF1049 OS	Rhodopseudomonas faecalis OX	0.0905	1.24396	5.13071
tr|A0A2T4JDR6|A0A2T4JDR6_RHOBL	PepSY domain-containing protein OS	Rhodobacter blasticus DSM 2131 OX	0.09086	0.566341	6.69895
tr|A0A318TYT5|A0A318TYT5_9BRAD	Amino acid/amide ABC transporter substrate-binding protein (HAAT family) OS	Rhodopseudomonas faecalis OX	0.09147	0.870403	6.52281
tr|A0A4U6MA89|A0A4U6MA89_9ENTR	30S ribosomal protein S3 OS	Citrobacter sp. TBCS-14 OX	0.09152	1.4587	8.89922
tr|A0A318TH24|A0A318TH24_9BRAD	Thioesterase superfamily protein OS	Rhodopseudomonas faecalis OX	0.09168	1.57689	1.95317
tr|A0A2T4JAW0|A0A2T4JAW0_RHOBL	Glutamine synthetase OS	Rhodobacter blasticus DSM 2131 OX	0.09172	0.571472	8.08627
tr|A0A318TQH9|A0A318TQH9_9BRAD	Cystathionine beta-synthase OS	Rhodopseudomonas faecalis OX	0.09181	0.747039	2.54447
tr|A0A318TNV0|A0A318TNV0_9BRAD	Tyrosine--tRNA ligase OS	Rhodopseudomonas faecalis OX	0.09197	1.16871	1.21818
tr|A0A318TCS1|A0A318TCS1_9BRAD	50S ribosomal protein L22 OS	Rhodopseudomonas faecalis OX	0.09293	1.40949	4.07355
tr|A0A4R2NNC8|A0A4R2NNC8_RHOAD	Succinate--CoA ligase [ADP-forming] subunit alpha OS	Rhodovulum adriaticum OX	0.09303	2.53009	8.59117
tr|A0A318TJ91|A0A318TJ91_9BRAD	Uncharacterized protein DUF3597 OS	Rhodopseudomonas faecalis OX	0.09331	0.770326	8.82784
tr|A0A318TCD1|A0A318TCD1_9BRAD	Universal stress protein family protein OS	Rhodopseudomonas faecalis OX	0.09354	0.728545	7.78153
tr|A0A318TEK7|A0A318TEK7_9BRAD	Response regulator receiver protein OS	Rhodopseudomonas faecalis OX	0.09368	0.61049	8.16618
tr|Q214R8|Q214R8_RHOPB	Type I secretion outer membrane protein, TolC OS	Rhodopseudomonas palustris (strain BisB18) OX	0.09385	1.19283	3.66953
tr|A0A318TLZ5|A0A318TLZ5_9BRAD	Glucokinase OS	Rhodopseudomonas faecalis OX	0.09405	1.18594	6.57951
tr|A0A318TAL4|A0A318TAL4_9BRAD	LemA protein OS	Rhodopseudomonas faecalis OX	0.09437	0.846006	4.26695
tr|A0A318TNM6|A0A318TNM6_9BRAD	Acyl-[acyl-carrier-protein]--UDP-N-acetylglucosamine O-acyltransferase OS	Rhodopseudomonas faecalis OX	0.09443	1.09508	5.04817
tr|A0A2T4J642|A0A2T4J642_RHOBL	Nitrate ABC transporter substrate-binding protein OS	Rhodobacter blasticus DSM 2131 OX	0.09491	0.660213	3.21889
tr|A0A1G7RN67|A0A1G7RN67_RHOCA	Acetyl-coenzyme A synthetase N-terminus (Fragment) OS	Rhodobacter capsulatus OX	0.09542	0.45272	7.13972
tr|A0A318TSQ0|A0A318TSQ0_9BRAD	Ferritin-like metal-binding protein YciE OS	Rhodopseudomonas faecalis OX	0.09547	1.21991	5.55275
tr|A0A318TEB0|A0A318TEB0_9BRAD	Effector-binding domain-containing protein OS	Rhodopseudomonas faecalis OX	0.0956	0.90941	7.24677
tr|A0A318TR43|A0A318TR43_9BRAD	Outer membrane protein OS	Rhodopseudomonas faecalis OX	0.09563	1.52136	0.25219
tr|A0A1G7P8J1|A0A1G7P8J1_RHOCA	Acyl-CoA reductase OS	Rhodobacter capsulatus OX	0.09628	2.14324	2.29562
tr|A0A318TEB6|A0A318TEB6_9BRAD	Uncharacterized protein OS	Rhodopseudomonas faecalis OX	0.09635	0.738613	4.90613
tr|Q6N7A4|Q6N7A4_RHOPA	FeMo cofactor biosynthesis protein NifB OS	Rhodopseudomonas palustris (strain ATCC BAA-98 / CGA009) OX	0.09636	0.406653	2.04679
tr|A0A318TI44|A0A318TI44_9BRAD	Uncharacterized protein OS	Rhodopseudomonas faecalis OX	0.09651	1.14858	1.71746
tr|A0A318TT97|A0A318TT97_9BRAD	3-hydroxyisobutyrate dehydrogenase OS	Rhodopseudomonas faecalis OX	0.09742	1.49821	0.535881
sp|Q07MG7|EFP_RHOP5	Elongation factor P OS	Rhodopseudomonas palustris (strain BisA53) OX	0.09752	3.74795	5.30465
tr|A0A318TDC7|A0A318TDC7_9BRAD	ATP synthase subunit b OS	Rhodopseudomonas faecalis OX	0.09783	1.30812	8.06891
tr|R8WL51|R8WL51_9ENTR	30S ribosomal protein S12 OS	Citrobacter sp. KTE151 OX	0.09814	1.19932	4.97433
tr|A0A318TFR2|A0A318TFR2_9BRAD	Pyridoxine 5'-phosphate synthase OS	Rhodopseudomonas faecalis OX	0.09894	1.14848	7.73862
tr|A0A6N9KH87|A0A6N9KH87_CITAM	Glutamate/aspartate ABC transporter substrate-binding protein OS	Citrobacter amalonaticus OX	0.10008	0.54577	0.224868
tr|A0A318TAZ4|A0A318TAZ4_9BRAD	Putative tellurite resistance protein B-like protein OS	Rhodopseudomonas faecalis OX	0.10082	1.60244	5.42206
tr|A0A318TJC3|A0A318TJC3_9BRAD	ATP diphosphatase OS	Rhodopseudomonas faecalis OX	0.10114	1.3147	0.262185
tr|D2TLR7|D2TLR7_CITRI	Peptidylprolyl isomerase OS	Citrobacter rodentium (strain ICC168) OX	0.10124	2.39284	6.13077
tr|A0A318T9X4|A0A318T9X4_9BRAD	Tryptophan--tRNA ligase OS	Rhodopseudomonas faecalis OX	0.10161	1.28905	7.40875
tr|A0A318TDC9|A0A318TDC9_9BRAD	Uncharacterized protein OS	Rhodopseudomonas faecalis OX	0.10201	0.265924	1.00595
tr|A0A318TQ80|A0A318TQ80_9BRAD	Hemolysin-activating ACP:hemolysin acyltransferase OS	Rhodopseudomonas faecalis OX	0.10203	2.60257	1.77533
tr|F8WVS7|F8WVS7_9BACT	50S ribosomal protein L2 OS	Dysgonomonas mossii DSM 22836 OX	0.10286	1.27417	7.57888
tr|A0A318TRN0|A0A318TRN0_9BRAD	Phage repressor protein C with HTH and peptisase S24 domain OS	Rhodopseudomonas faecalis OX	0.10293	0.756874	8.35157
tr|F8WX07|F8WX07_9BACT	Uncharacterized protein OS	Dysgonomonas mossii DSM 22836 OX	0.10339	0.123395	8.49973
tr|A0A318TCP8|A0A318TCP8_9BRAD	50S ribosomal protein L25 OS	Rhodopseudomonas faecalis OX	0.10358	1.11877	8.99572
tr|A0A318TGL4|A0A318TGL4_9BRAD	YCII domain-containing protein OS	Rhodopseudomonas faecalis OX	0.10369	0.676958	0.715151
tr|A0A318TCD8|A0A318TCD8_9BRAD	3'(2'),5'-bisphosphate nucleotidase CysQ OS	Rhodopseudomonas faecalis OX	0.10443	1.16247	1.35516
tr|A0A318TKU7|A0A318TKU7_9BRAD	Nitrous-oxide reductase OS	Rhodopseudomonas faecalis OX	0.10467	0.870518	1.27534
tr|A0A318TFH7|A0A318TFH7_9BRAD	DUF1244 domain-containing protein OS	Rhodopseudomonas faecalis OX	0.10499	1.21671	7.94181
tr|A0A318TIB0|A0A318TIB0_9BRAD	Homoserine dehydrogenase OS	Rhodopseudomonas faecalis OX	0.1051	1.08344	4.36759
tr|A0A1G7JXI9|A0A1G7JXI9_RHOCA	Elongation factor G OS	Rhodobacter capsulatus OX	0.1051	2.12713	0.103306
tr|A0A2T4J9A4|A0A2T4J9A4_RHOBL	ABC transporter substrate-binding protein OS	Rhodobacter blasticus DSM 2131 OX	0.10525	1.53032	6.09216
tr|A0A318T8E0|A0A318T8E0_9BRAD	Adenosylhomocysteinase OS	Rhodopseudomonas faecalis OX	0.10547	1.16541	6.81719
tr|A0A323UHG8|A0A323UHG8_RHOPL	Nitrogenase molybdenum-iron protein beta chain OS	Rhodopseudomonas palustris OX	0.10552	0.65992	4.30591
tr|A0A318TR73|A0A318TR73_9BRAD	5'-nucleotidase SurE OS	Rhodopseudomonas faecalis OX	0.10599	1.1935	7.51358
tr|F8WZT5|F8WZT5_9BACT	50S ribosomal protein L13 OS	Dysgonomonas mossii DSM 22836 OX	0.10692	1.75271	0.822596
tr|A8AIH2|A8AIH2_CITK8	30S ribosomal protein S1 OS	Citrobacter koseri (strain ATCC BAA-895 / CDC 4225-83 / SGSC4696) OX	0.10715	1.32391	1.57514
tr|A0A318TIU0|A0A318TIU0_9BRAD	Prephenate dehydratase OS	Rhodopseudomonas faecalis OX	0.10731	1.07414	8.57274
tr|A0A318TNB8|A0A318TNB8_9BRAD	Methylmalonate-semialdehyde dehydrogenase [acylating] OS	Rhodopseudomonas faecalis OX	0.10736	1.06497	4.4982
tr|A0A318T9K0|A0A318T9K0_9BRAD	DNA helicase OS	Rhodopseudomonas faecalis OX	0.10756	1.66084	0.850532
tr|A0A318T9X3|A0A318T9X3_9BRAD	Arginine biosynthesis bifunctional protein ArgJ OS	Rhodopseudomonas faecalis OX	0.10849	1.07507	7.84711
tr|B9KL89|B9KL89_RHOSK	Elongation factor Tu OS	Rhodobacter sphaeroides (strain KD131 / KCTC 12085) OX	0.10883	1.14316	3.89313
tr|A0A318TU98|A0A318TU98_9BRAD	Protein-glutamate O-methyltransferase OS	Rhodopseudomonas faecalis OX	0.10911	0.536528	1.12359
tr|A0A318TG20|A0A318TG20_9BRAD	Sulfide dehydrogenase (Flavocytochrome c) flavoprotein subunit OS	Rhodopseudomonas faecalis OX	0.10982	1.61128	3.32104
tr|A0A6N2VYK6|A0A6N2VYK6_CITAM	2-oxoglutarate dehydrogenase E1 component OS	Citrobacter amalonaticus OX	0.10987	1.52005	3.55667
tr|A0A418V4A4|A0A418V4A4_RHOPL	Elongation factor Tu OS	Rhodopseudomonas palustris OX	0.1108	1.19239	4.37613
tr|A0A318TE82|A0A318TE82_9BRAD	Dihydrolipoyllysine-residue succinyltransferase component of 2-oxoglutarate dehydrogenase complex OS	Rhodopseudomonas faecalis OX	0.11085	0.895706	3.22215
tr|A0A318TB05|A0A318TB05_9BRAD	N-ethylmaleimide reductase OS	Rhodopseudomonas faecalis OX	0.11135	1.18239	0.0997411
tr|A0A318TKK6|A0A318TKK6_9BRAD	Lytic murein transglycosylase OS	Rhodopseudomonas faecalis OX	0.11146	0.8443	7.88895
tr|A0A318TDG5|A0A318TDG5_9BRAD	Peptidoglycan-associated protein OS	Rhodopseudomonas faecalis OX	0.11249	1.19373	8.28502
tr|A0A318TSQ1|A0A318TSQ1_9BRAD	Enoyl-CoA hydratase OS	Rhodopseudomonas faecalis OX	0.11254	1.11165	7.28938
tr|A0A318TI34|A0A318TI34_9BRAD	Phosphoglucomutase OS	Rhodopseudomonas faecalis OX	0.11267	0.918354	4.44801
tr|A0A318TAY9|A0A318TAY9_9BRAD	Dual-specificity RNA methyltransferase RlmN OS	Rhodopseudomonas faecalis OX	0.11306	1.63321	1.23806
tr|A0A318TIP1|A0A318TIP1_9BRAD	Glutamine--fructose-6-phosphate transaminase (isomerizing) OS	Rhodopseudomonas faecalis OX	0.11386	1.2012	2.53961
tr|Q21D87|Q21D87_RHOPB	Succinate dehydrogenase flavoprotein subunit OS	Rhodopseudomonas palustris (strain BisB18) OX	0.11407	2.56212	3.88524
tr|A0A318TAH9|A0A318TAH9_9BRAD	30S ribosomal protein S13 OS	Rhodopseudomonas faecalis OX	0.11442	1.11071	0.0250565
tr|A0A318TEI7|A0A318TEI7_9BRAD	Pantothenate synthetase OS	Rhodopseudomonas faecalis OX	0.11455	0.939754	4.0453
tr|E6VE60|E6VE60_RHOPX	Bifunctional purine biosynthesis protein PurH OS	Rhodopseudomonas palustris (strain DX-1) OX	0.1153	0.489511	7.96938
tr|A0A6L5EEI2|A0A6L5EEI2_9ENTR	50S ribosomal protein L13 OS	Citrobacter sp. NMI7905_11 OX	0.11592	1.31848	2.98642
tr|A0A318TKM4|A0A318TKM4_9BRAD	2-oxoglutarate ferredoxin oxidoreductase beta subunit OS	Rhodopseudomonas faecalis OX	0.11596	1.19181	1.69303
tr|A0A318TBK3|A0A318TBK3_9BRAD	30S ribosomal protein S1 OS	Rhodopseudomonas faecalis OX	0.11602	1.09204	4.65562
tr|A0A318TJ48|A0A318TJ48_9BRAD	Precorrin-8X methylmutase OS	Rhodopseudomonas faecalis OX	0.11622	1.23037	5.39922
tr|A0A318TFU3|A0A318TFU3_9BRAD	K(+)-insensitive pyrophosphate-energized proton pump OS	Rhodopseudomonas faecalis OX	0.11677	0.787741	6.60747
tr|A0A318T8C0|A0A318T8C0_9BRAD	Short-subunit dehydrogenase OS	Rhodopseudomonas faecalis OX	0.11808	1.44751	8.03419
tr|A0A318TQN9|A0A318TQN9_9BRAD	Uncharacterized protein OS	Rhodopseudomonas faecalis OX	0.11843	0.413699	2.01978
tr|A0A318TZN9|A0A318TZN9_9BRAD	MoxR-like ATPase OS	Rhodopseudomonas faecalis OX	0.11941	1.29215	2.65164
tr|A0A318TFK1|A0A318TFK1_9BRAD	Iron(III) transport system substrate-binding protein OS	Rhodopseudomonas faecalis OX	0.11967	0.776105	0.107593
tr|A0A318T7W1|A0A318T7W1_9BRAD	tRNA (cytidine/uridine-2'-O-)-methyltransferase TrmJ OS	Rhodopseudomonas faecalis OX	0.12005	1.26353	0.947178
tr|A0A318TDX8|A0A318TDX8_9BRAD	Uncharacterized protein OS	Rhodopseudomonas faecalis OX	0.12023	1.10521	6.89385
tr|A0A318TKD3|A0A318TKD3_9BRAD	Deoxyuridine 5'-triphosphate nucleotidohydrolase OS	Rhodopseudomonas faecalis OX	0.12026	1.17446	3.43612
tr|A0A318TFV1|A0A318TFV1_9BRAD	Lytic murein transglycosylase OS	Rhodopseudomonas faecalis OX	0.12032	0.891013	8.76261
tr|A0A318TBP3|A0A318TBP3_9BRAD	NAD(P)-dependent dehydrogenase (Short-subunit alcohol dehydrogenase family) OS	Rhodopseudomonas faecalis OX	0.12104	0.777424	8.5536
tr|A0A318TJ07|A0A318TJ07_9BRAD	Aspartyl-tRNA(Asn)/glutamyl-tRNA(Gln) amidotransferase subunit A OS	Rhodopseudomonas faecalis OX	0.12131	1.07722	8.08182
tr|A0A318TEH3|A0A318TEH3_9BRAD	Nicotinate-nucleotide--dimethylbenzimidazole phosphoribosyltransferase OS	Rhodopseudomonas faecalis OX	0.12183	0.28366	7.94585
tr|A0A318TEC1|A0A318TEC1_9BRAD	Flagellin-like hook-associated protein FlgL (Fragment) OS	Rhodopseudomonas faecalis OX	0.12236	1.37532	7.44904
tr|A0A318TC59|A0A318TC59_9BRAD	Sulfate transport system substrate-binding protein OS	Rhodopseudomonas faecalis OX	0.12286	1.18609	8.8537
tr|A0A1G7NMY0|A0A1G7NMY0_RHOCA	UPF0125 protein SAMN04244550_02786 OS	Rhodobacter capsulatus OX	0.12292	0.44909	3.39781
tr|A0A318T8V9|A0A318T8V9_9BRAD	Acyl dehydratase OS	Rhodopseudomonas faecalis OX	0.12298	1.13644	4.8023
tr|A0A318TDL3|A0A318TDL3_9BRAD	DNA ligase OS	Rhodopseudomonas faecalis OX	0.12335	0.824269	8.19289
tr|A0A318TBS7|A0A318TBS7_9BRAD	Cobaltochelatase CobT subunit OS	Rhodopseudomonas faecalis OX	0.12424	1.28263	5.48856
tr|A0A2W5S2A8|A0A2W5S2A8_RHOSH	F0F1 ATP synthase subunit beta (Fragment) OS	Rhodobacter sphaeroides OX	0.12451	6.72957	3.19259
tr|A0A4U1K461|A0A4U1K461_RHOCA	Aspartate/tyrosine/aromatic aminotransferase OS	Rhodobacter capsulatus OX	0.12471	1.58494	7.24872
tr|A0A318T979|A0A318T979_9BRAD	Sugar O-acyltransferase (Sialic acid O-acetyltransferase NeuD family) OS	Rhodopseudomonas faecalis OX	0.12485	1.31923	0.140791
tr|A0A4U1K0T4|A0A4U1K0T4_RHOCA	Bifunctional enoyl-CoA hydratase/phosphate acetyltransferase OS	Rhodobacter capsulatus OX	0.12498	0.682171	6.77448
tr|A0A318THU5|A0A318THU5_9BRAD	Alanine racemase OS	Rhodopseudomonas faecalis OX	0.12565	1.11166	6.2892
tr|Q07QG8|Q07QG8_RHOP5	Transcriptional regulator, MucR family OS	Rhodopseudomonas palustris (strain BisA53) OX	0.12574	1.27412	2.41528
tr|A0A6N2VWE2|A0A6N2VWE2_CITAM	Dihydrolipoyllysine-residue succinyltransferase component of 2-oxoglutarate dehydrogenase complex OS	Citrobacter amalonaticus OX	0.12588	1.35613	6.94552
tr|F8WZC5|F8WZC5_9BACT	Propionyl-CoA carboxylase subunit beta OS	Dysgonomonas mossii DSM 22836 OX	0.12608	1.35123	8.00337
tr|A0A6L5EAH8|A0A6L5EAH8_9ENTR	50S ribosomal protein L6 OS	Citrobacter sp. NMI7905_11 OX	0.12627	1.23418	7.31118
tr|A0A318TLN4|A0A318TLN4_9BRAD	30S ribosomal protein S4 OS	Rhodopseudomonas faecalis OX	0.12642	1.12236	3.97576
tr|A0A318T7W0|A0A318T7W0_9BRAD	O-acetylhomoserine sulfhydrylase OS	Rhodopseudomonas faecalis OX	0.12645	1.17515	3.78696
tr|A0A318TJU6|A0A318TJU6_9BRAD	Acrylyl-CoA reductase (NADPH) OS	Rhodopseudomonas faecalis OX	0.12649	1.30103	1.58719
tr|F8WY86|F8WY86_9BACT	Glyceraldehyde-3-phosphate dehydrogenase OS	Dysgonomonas mossii DSM 22836 OX	0.12787	0.814121	0.972778
tr|A0A318TS07|A0A318TS07_9BRAD	Aminotransferase OS	Rhodopseudomonas faecalis OX	0.12815	1.20694	4.64464
tr|A0A318TEL2|A0A318TEL2_9BRAD	Homospermidine synthase OS	Rhodopseudomonas faecalis OX	0.12855	1.11004	8.16325
tr|A0A318TML2|A0A318TML2_9BRAD	3-oxoacyl-[acyl-carrier-protein] synthase II OS	Rhodopseudomonas faecalis OX	0.12891	1.1352	4.34891
tr|A0A318TTI3|A0A318TTI3_9BRAD	[SSU ribosomal protein S5P]-alanine acetyltransferase OS	Rhodopseudomonas faecalis OX	0.12894	1.25952	8.16289
tr|A0A212RL66|A0A212RL66_RHOAC	ATP-dependent RNA helicase SUPV3L1/SUV3 OS	Rhodoblastus acidophilus OX	0.12933	1.97182	4.77147
tr|A0A318TVC6|A0A318TVC6_9BRAD	Ribulose bisphosphate carboxylase OS	Rhodopseudomonas faecalis OX	0.1298	1.26729	8.80257
tr|Q07IZ9|Q07IZ9_RHOP5	D-3-phosphoglycerate dehydrogenase OS	Rhodopseudomonas palustris (strain BisA53) OX	0.12982	1.26375	6.29995
tr|A0A318TYV9|A0A318TYV9_9BRAD	Multidrug efflux system membrane fusion protein OS	Rhodopseudomonas faecalis OX	0.13033	1.17297	4.58086
tr|A0A318TB09|A0A318TB09_9BRAD	Chaperone protein DnaK OS	Rhodopseudomonas faecalis OX	0.13063	1.13862	7.31405
tr|A0A6L5E9B2|A0A6L5E9B2_9ENTR	DUF1471 domain-containing protein OS	Citrobacter sp. NMI7905_11 OX	0.13064	0.654615	2.61972
tr|A0A318TB93|A0A318TB93_9BRAD	dCTP deaminase OS	Rhodopseudomonas faecalis OX	0.13073	0.621407	3.47331
tr|A0A318THF6|A0A318THF6_9BRAD	Enamine deaminase RidA (YjgF/YER057c/UK114 family) OS	Rhodopseudomonas faecalis OX	0.1309	0.667712	5.75246
tr|Q210H2|Q210H2_RHOPB	Maltose alpha-D-glucosyltransferase OS	Rhodopseudomonas palustris (strain BisB18) OX	0.13095	1.54391	2.2779
tr|A0A6G8UG98|A0A6G8UG98_9ENTR	Elongation factor G OS	Citrobacter sp. Y3 OX	0.13099	1.24097	3.89278
tr|A0A318TTW6|A0A318TTW6_9BRAD	Acetyl-CoA C-acetyltransferase/acetyl-CoA acyltransferase OS	Rhodopseudomonas faecalis OX	0.13188	1.09905	6.61676
tr|A0A318TFQ3|A0A318TFQ3_9BRAD	3-oxoacyl-[acyl-carrier-protein] reductase OS	Rhodopseudomonas faecalis OX	0.13241	1.14302	7.35972
sp|Q20Y76|APT_RHOPB	Adenine phosphoribosyltransferase OS	Rhodopseudomonas palustris (strain BisB18) OX	0.13294	1.48596	6.73742
tr|A0A318TI88|A0A318TI88_9BRAD	Putative cold-shock DNA-binding protein OS	Rhodopseudomonas faecalis OX	0.13308	1.10975	4.59617
tr|A0A318TI72|A0A318TI72_9BRAD	Parvulin-like PPIase OS	Rhodopseudomonas faecalis OX	0.13376	1.11999	0.528285
tr|A0A6G8ULR5|A0A6G8ULR5_9ENTR	Outer membrane protein OmpW OS	Citrobacter sp. Y3 OX	0.13438	1.36197	1.90989
tr|A0A318T9G0|A0A318T9G0_9BRAD	Uncharacterized protein DUF3108 OS	Rhodopseudomonas faecalis OX	0.13494	1.69829	8.29928
tr|A0A318TM45|A0A318TM45_9BRAD	Putative phiE125 gp8 family phage protein OS	Rhodopseudomonas faecalis OX	0.13583	1.38538	7.07835
tr|D5FL05|D5FL05_ECOLX	MrkA OS	Escherichia coli OX	0.13594	1.293	1.47799
tr|A0A2T4J7I8|A0A2T4J7I8_RHOBL	Spermidine/putrescine ABC transporter substrate-binding protein OS	Rhodobacter blasticus DSM 2131 OX	0.13598	4.73665	4.25761
tr|A0A6N9KEE3|A0A6N9KEE3_CITAM	Glycerol kinase GlpK OS	Citrobacter amalonaticus OX	0.13609	1.44951	5.72175
tr|A0A318TA84|A0A318TA84_9BRAD	Argininosuccinate synthase OS	Rhodopseudomonas faecalis OX	0.13795	1.15239	7.36841
tr|A0A318TV88|A0A318TV88_9BRAD	NitT/TauT family transport system ATP-binding protein OS	Rhodopseudomonas faecalis OX	0.13814	0.747232	4.48662
tr|A0A318THP1|A0A318THP1_9BRAD	Uncharacterized protein OS	Rhodopseudomonas faecalis OX	0.13854	0.381074	5.73565
tr|A0A318TDH0|A0A318TDH0_9BRAD	Uroporphyrinogen-III synthase OS	Rhodopseudomonas faecalis OX	0.13884	1.30147	6.07801
tr|R8WJ72|R8WJ72_9ENTR	DNA-binding protein HU-alpha OS	Citrobacter sp. KTE151 OX	0.14092	1.17352	7.48659
tr|A0A1G7KUE6|A0A1G7KUE6_RHOCA	Molybdopterin or thiamine biosynthesis adenylyltransferase OS	Rhodobacter capsulatus OX	0.14097	0.137415	0.648897
tr|A0A318TJS0|A0A318TJS0_9BRAD	Hippurate hydrolase OS	Rhodopseudomonas faecalis OX	0.14112	1.46775	1.62641
tr|A0A318TQS7|A0A318TQS7_9BRAD	Chitooligosaccharide deacetylase OS	Rhodopseudomonas faecalis OX	0.14229	1.1356	5.29957
tr|A0A318TAI3|A0A318TAI3_9BRAD	Cysteine synthase OS	Rhodopseudomonas faecalis OX	0.14262	1.47243	7.44452
tr|A0A318TC87|A0A318TC87_9BRAD	Chaperone protein ClpB OS	Rhodopseudomonas faecalis OX	0.14326	1.36105	7.57236
tr|A0A336JR89|A0A336JR89_9BRAD	Ketol-acid reductoisomerase (NADP(+)) OS	Rhodopseudomonas pentothenatexigens OX	0.14446	0.835249	8.39319
tr|A0A318TKM6|A0A318TKM6_9BRAD	Periplasmic serine endoprotease DegP-like OS	Rhodopseudomonas faecalis OX	0.14473	1.12456	3.3553
tr|R8WZU7|R8WZU7_9ENTR	Trigger factor OS	Citrobacter sp. KTE151 OX	0.14474	0.216522	7.20682
tr|A0A4Y9IM88|A0A4Y9IM88_9BACT	Elongation factor Tu OS	Dysgonomonas mossii OX	0.14491	0.850941	6.82374
tr|A0A318TEF3|A0A318TEF3_9BRAD	Aspartate carbamoyltransferase OS	Rhodopseudomonas faecalis OX	0.14613	1.08465	8.34263
tr|A0A318TBN6|A0A318TBN6_9BRAD	Long-chain acyl-CoA synthetase OS	Rhodopseudomonas faecalis OX	0.14636	1.14083	8.94027
tr|A0A318THD2|A0A318THD2_9BRAD	Enoyl-CoA hydratase/carnithine racemase OS	Rhodopseudomonas faecalis OX	0.14641	1.14627	1.38994
tr|A0A318TCV2|A0A318TCV2_9BRAD	50S ribosomal protein L7/L12 OS	Rhodopseudomonas faecalis OX	0.14709	1.12229	2.88842
tr|Q07LR9|Q07LR9_RHOP5	NLPA lipoprotein OS	Rhodopseudomonas palustris (strain BisA53) OX	0.1474	7.16404	3.85833
tr|A0A318TI48|A0A318TI48_9BRAD	Protein-disulfide isomerase OS	Rhodopseudomonas faecalis OX	0.14742	1.17925	3.89235
tr|A0A336K496|A0A336K496_9BRAD	Phospho-2-dehydro-3-deoxyheptonate aldolase OS	Rhodopseudomonas pentothenatexigens OX	0.1485	1.855	8.87477
tr|Q07RY1|Q07RY1_RHOP5	Magnesium protoporphyrin O-methyltransferase OS	Rhodopseudomonas palustris (strain BisA53) OX	0.14923	1.63376	6.88596
tr|Q6N7A5|Q6N7A5_RHOPA	Nitrogenase iron protein OS	Rhodopseudomonas palustris (strain ATCC BAA-98 / CGA009) OX	0.14929	1.65436	0.911727
tr|A0A318T745|A0A318T745_9BRAD	Uncharacterized protein OS	Rhodopseudomonas faecalis OX	0.14935	1.15175	3.80216
tr|A0A318T7L1|A0A318T7L1_9BRAD	Global cell cycle regulator GcrA OS	Rhodopseudomonas faecalis OX	0.15	0.796406	6.93458
tr|A0A318TN21|A0A318TN21_9BRAD	Ubiquinol-cytochrome c reductase iron-sulfur subunit OS	Rhodopseudomonas faecalis OX	0.15001	0.845238	4.19826
tr|A0A318TL08|A0A318TL08_9BRAD	Uracil-DNA glycosylase family 4 OS	Rhodopseudomonas faecalis OX	0.15005	0.394823	5.0801
tr|A0A0Q0R2C1|A0A0Q0R2C1_RHOCA	Uncharacterized protein OS	Rhodobacter capsulatus OX	0.15013	0.542325	2.9337
tr|A0A318TCR3|A0A318TCR3_9BRAD	50S ribosomal protein L6 OS	Rhodopseudomonas faecalis OX	0.15038	1.09469	2.29629
tr|A0A318TCE3|A0A318TCE3_9BRAD	Quinol monooxygenase YgiN OS	Rhodopseudomonas faecalis OX	0.15187	0.892995	6.98692
tr|A0A6L5E1Z2|A0A6L5E1Z2_9ENTR	Porin OmpA OS	Citrobacter sp. NMI7905_11 OX	0.15195	1.24061	5.96175
tr|A0A318TAQ2|A0A318TAQ2_9BRAD	Uncharacterized protein OS	Rhodopseudomonas faecalis OX	0.15227	1.09046	5.68737
tr|A0A318TGK0|A0A318TGK0_9BRAD	Phosphate acyltransferase OS	Rhodopseudomonas faecalis OX	0.15231	1.24646	5.21836
tr|A0A318TBQ2|A0A318TBQ2_9BRAD	Mechanosensitive ion channel-like protein OS	Rhodopseudomonas faecalis OX	0.15246	1.57482	2.07511
tr|A0A318TGK8|A0A318TGK8_9BRAD	Signal peptidase I OS	Rhodopseudomonas faecalis OX	0.15286	1.1823	8.8785
tr|A0A318T8U8|A0A318T8U8_9BRAD	Ribosome maturation factor RimP OS	Rhodopseudomonas faecalis OX	0.15315	1.39646	5.22345
tr|A0A318TJ39|A0A318TJ39_9BRAD	Superoxide dismutase OS	Rhodopseudomonas faecalis OX	0.15327	0.902034	1.15551
tr|A0A318TND8|A0A318TND8_9BRAD	CreA protein OS	Rhodopseudomonas faecalis OX	0.15421	0.901406	7.55396
tr|A0A318TDB4|A0A318TDB4_9BRAD	Holliday junction ATP-dependent DNA helicase RuvB OS	Rhodopseudomonas faecalis OX	0.15577	1.42784	0.491282
tr|A0A6G8UFZ1|A0A6G8UFZ1_9ENTR	Peptidyl-prolyl cis-trans isomerase OS	Citrobacter sp. Y3 OX	0.15737	2.5054	6.3123
tr|D5AQI5|D5AQI5_RHOCB	50S ribosomal protein L25 OS	Rhodobacter capsulatus (strain ATCC BAA-309 / NBRC 16581 / SB1003) OX	0.15738	2.59602	2.12431
tr|A0A318TH25|A0A318TH25_9BRAD	Secondary thiamine-phosphate synthase enzyme OS	Rhodopseudomonas faecalis OX	0.15778	0.66627	2.68976
tr|A0A318TLN6|A0A318TLN6_9BRAD	NAD(P)-dependent dehydrogenase (Short-subunit alcohol dehydrogenase family) OS	Rhodopseudomonas faecalis OX	0.15812	1.07792	1.90365
tr|A0A318TVR0|A0A318TVR0_9BRAD	NADPH:quinone reductase-like Zn-dependent oxidoreductase OS	Rhodopseudomonas faecalis OX	0.15924	0.938091	5.4193
tr|A0A318TR75|A0A318TR75_9BRAD	Ubiquinol-cytochrome c reductase iron-sulfur subunit OS	Rhodopseudomonas faecalis OX	0.15932	1.16038	7.06996
tr|A0A318TQJ9|A0A318TQJ9_9BRAD	ArsR family transcriptional regulator OS	Rhodopseudomonas faecalis OX	0.15964	0.507255	7.52957
tr|Q07MY0|Q07MY0_RHOP5	Peptidyl-prolyl cis-trans isomerase OS	Rhodopseudomonas palustris (strain BisA53) OX	0.16069	2.65053	1.18524
tr|A0A318TNV5|A0A318TNV5_9BRAD	DNA mismatch repair protein MutS OS	Rhodopseudomonas faecalis OX	0.16132	1.48958	1.80272
tr|A0A318TGG6|A0A318TGG6_9BRAD	Cobyric acid synthase OS	Rhodopseudomonas faecalis OX	0.16227	1.15596	6.58539
tr|A0A318THZ8|A0A318THZ8_9BRAD	Dihydroorotase OS	Rhodopseudomonas faecalis OX	0.16239	0.84503	7.29423
tr|A0A318TLL4|A0A318TLL4_9BRAD	NifU-like protein involved in Fe-S cluster formation OS	Rhodopseudomonas faecalis OX	0.16243	1.16747	0.395445
tr|A0A318TGJ4|A0A318TGJ4_9BRAD	META domain-containing protein OS	Rhodopseudomonas faecalis OX	0.16246	0.893072	0.730692
tr|A0A318TCZ4|A0A318TCZ4_9BRAD	Sulfate transport system substrate-binding protein OS	Rhodopseudomonas faecalis OX	0.16251	1.07897	5.84678
tr|A0A318TCZ3|A0A318TCZ3_9BRAD	Efflux pump membrane transporter OS	Rhodopseudomonas faecalis OX	0.16274	1.18351	4.83377
tr|A0A318TDE9|A0A318TDE9_9BRAD	Histidine kinase OS	Rhodopseudomonas faecalis OX	0.16282	0.682027	1.31191
tr|Q6N9L5|Q6N9L5_RHOPA	Light-harvesting complex 1 beta chain OS	Rhodopseudomonas palustris (strain ATCC BAA-98 / CGA009) OX	0.16289	0.721383	0.166385
tr|A0A318TDN2|A0A318TDN2_9BRAD	Pyridoxine/pyridoxamine 5'-phosphate oxidase OS	Rhodopseudomonas faecalis OX	0.16328	1.16388	6.817
tr|A0A318TJD8|A0A318TJD8_9BRAD	D-3-phosphoglycerate dehydrogenase OS	Rhodopseudomonas faecalis OX	0.16405	1.22096	6.37841
tr|A0A318TZ77|A0A318TZ77_9BRAD	Uncharacterized protein DUF3168 OS	Rhodopseudomonas faecalis OX	0.16409	1.5917	0.660113
tr|A0A318TL03|A0A318TL03_9BRAD	NAD kinase OS	Rhodopseudomonas faecalis OX	0.1646	1.08455	1.27255
tr|A0A6L5E8X8|A0A6L5E8X8_9ENTR	Ribose ABC transporter substrate-binding protein RbsB OS	Citrobacter sp. NMI7905_11 OX	0.16505	1.29834	4.46724
tr|A0A318TKG5|A0A318TKG5_9BRAD	Uncharacterized protein OS	Rhodopseudomonas faecalis OX	0.16546	1.08563	6.20037
tr|A0A318TTS6|A0A318TTS6_9BRAD	Uncharacterized protein OS	Rhodopseudomonas faecalis OX	0.1655	0.856344	2.68502
tr|A0A318THH4|A0A318THH4_9BRAD	Nitronate monooxygenase OS	Rhodopseudomonas faecalis OX	0.16695	0.769685	6.9734
tr|A0A318TIR5|A0A318TIR5_9BRAD	Zinc/manganese transport system substrate-binding protein OS	Rhodopseudomonas faecalis OX	0.16716	1.29528	6.98802
tr|A0A318TBT6|A0A318TBT6_9BRAD	RNA pyrophosphohydrolase OS	Rhodopseudomonas faecalis OX	0.16738	0.852152	0.675238
tr|A0A318TA46|A0A318TA46_9BRAD	6,7-dimethyl-8-ribityllumazine synthase OS	Rhodopseudomonas faecalis OX	0.16784	1.16793	8.1455
tr|F8WW87|F8WW87_9BACT	50S ribosomal protein L7/L12 OS	Dysgonomonas mossii DSM 22836 OX	0.168	1.13913	3.71586
tr|A0A318TE85|A0A318TE85_9BRAD	Uncharacterized protein YndB with AHSA1/START domain OS	Rhodopseudomonas faecalis OX	0.16849	1.07101	8.42474
tr|A0A318T7Y3|A0A318T7Y3_9BRAD	Putative lipid-binding transport protein (Tim44 family) OS	Rhodopseudomonas faecalis OX	0.1685	1.22447	0.83747
tr|A0A318TBR7|A0A318TBR7_9BRAD	Succinate--CoA ligase [ADP-forming] subunit beta OS	Rhodopseudomonas faecalis OX	0.16916	1.08532	5.93612
tr|A0A318TKY8|A0A318TKY8_9BRAD	Starvation-inducible DNA-binding protein OS	Rhodopseudomonas faecalis OX	0.16987	0.913861	7.48239
tr|A0A318TQJ3|A0A318TQJ3_9BRAD	Enoyl-CoA hydratase/carnithine racemase OS	Rhodopseudomonas faecalis OX	0.1703	1.13738	5.94513
tr|A0A6G8UM61|A0A6G8UM61_9ENTR	Iron-containing alcohol dehydrogenase OS	Citrobacter sp. Y3 OX	0.17079	1.16459	2.00219
tr|A0A318TG42|A0A318TG42_9BRAD	Membrane fusion protein (Multidrug efflux system) OS	Rhodopseudomonas faecalis OX	0.17088	1.18258	8.62901
tr|A0A6N2SQ68|A0A6N2SQ68_CITAM	Acetyl-CoA acetyltransferase OS	Citrobacter amalonaticus OX	0.17107	1.58884	8.18205
tr|A0A318T990|A0A318T990_9BRAD	Uncharacterized protein OS	Rhodopseudomonas faecalis OX	0.17131	0.625196	7.14017
tr|D2TTH2|D2TTH2_CITRI	50S ribosomal protein L7/L12 OS	Citrobacter rodentium (strain ICC168) OX	0.17197	1.25966	1.87465
tr|A0A318T9C6|A0A318T9C6_9BRAD	Transcription termination/antitermination protein NusG OS	Rhodopseudomonas faecalis OX	0.17321	1.15206	3.55303
tr|A0A318TFS3|A0A318TFS3_9BRAD	Putative cold-shock DNA-binding protein OS	Rhodopseudomonas faecalis OX	0.17376	11.0916	1.99828
tr|A0A318TGY8|A0A318TGY8_9BRAD	PRC-barrel domain protein OS	Rhodopseudomonas faecalis OX	0.17379	0.672431	7.46604
tr|A0A318TGW5|A0A318TGW5_9BRAD	Outer membrane immunogenic protein OS	Rhodopseudomonas faecalis OX	0.17397	0.666406	4.75565
tr|A0A285CRP0|A0A285CRP0_9RHOB	Uncharacterized protein DUF4157 OS	Rhodobacter ovatus OX	0.17537	1.71852	7.69414
tr|A0A318TTL1|A0A318TTL1_9BRAD	Sugar transport protein OS	Rhodopseudomonas faecalis OX	0.17582	0.895924	0.501987
tr|A0A318TI08|A0A318TI08_9BRAD	Winged helix family two component transcriptional regulator OS	Rhodopseudomonas faecalis OX	0.17708	1.09529	7.81044
tr|A0A318THQ3|A0A318THQ3_9BRAD	Uncharacterized protein DUF3572 OS	Rhodopseudomonas faecalis OX	0.17733	1.30641	3.26509
tr|A0A318TXP2|A0A318TXP2_9BRAD	Dinitrogenase iron-molybdenum cofactor OS	Rhodopseudomonas faecalis OX	0.17807	0.638169	0.21506
tr|A0A318TA71|A0A318TA71_9BRAD	NADH dehydrogenase subunit E OS	Rhodopseudomonas faecalis OX	0.17858	6.8304	4.33812
tr|A0A318T6R5|A0A318T6R5_9BRAD	DNA polymerase I OS	Rhodopseudomonas faecalis OX	0.17876	0.708588	2.14316
tr|A0A318TMV2|A0A318TMV2_9BRAD	RimJ/RimL family protein N-acetyltransferase OS	Rhodopseudomonas faecalis OX	0.17913	0.894643	6.80095
tr|A0A318TL25|A0A318TL25_9BRAD	Sulfide dehydrogenase (Flavoprotein) subunit SudA /sulfide dehydrogenase (Flavoprotein) subunit SudB OS	Rhodopseudomonas faecalis OX	0.17921	1.08184	8.02522
tr|A0A318TTZ2|A0A318TTZ2_9BRAD	Carbonic anhydrase/acetyltransferase-like protein (Isoleucine patch superfamily) OS	Rhodopseudomonas faecalis OX	0.17933	0.650645	5.92554
tr|A0A318TKP8|A0A318TKP8_9BRAD	Putative proteasome-type protease OS	Rhodopseudomonas faecalis OX	0.17953	1.13598	4.40056
tr|A0A0Q0QLK8|A0A0Q0QLK8_RHOCA	4Fe-4S dicluster domain-containing protein OS	Rhodobacter capsulatus OX	0.17956	0.355894	4.68449
tr|A0A318TR55|A0A318TR55_9BRAD	Uncharacterized protein DUF5076 OS	Rhodopseudomonas faecalis OX	0.17981	0.886747	1.17536
tr|A0A318TET2|A0A318TET2_9BRAD	Signal peptide peptidase A OS	Rhodopseudomonas faecalis OX	0.18033	0.756767	0.232162
tr|A0A318TM98|A0A318TM98_9BRAD	Outer membrane immunogenic protein OS	Rhodopseudomonas faecalis OX	0.18071	1.09183	7.54306
tr|A0A318TQL2|A0A318TQL2_9BRAD	Putative alpha-E superfamily protein OS	Rhodopseudomonas faecalis OX	0.18086	1.23216	0.341996
tr|A0A6N9KH31|A0A6N9KH31_CITAM	Porin OmpF OS	Citrobacter amalonaticus OX	0.18109	0.779118	8.51168
tr|Q07QY2|Q07QY2_RHOP5	Enoyl-CoA hydratase OS	Rhodopseudomonas palustris (strain BisA53) OX	0.1812	0.708311	8.81228
sp|Q217M3|FCTA_RHOPB	Formyl-CoA:oxalate CoA-transferase OS	Rhodopseudomonas palustris (strain BisB18) OX	0.18272	1.30352	2.98552
tr|A0A6H3AXT1|A0A6H3AXT1_9ENTR	Molecular chaperone OsmY OS	Citrobacter sp. A316 OX	0.18382	0.528353	5.84482
tr|A0A318TE96|A0A318TE96_9BRAD	Uncharacterized protein OS	Rhodopseudomonas faecalis OX	0.18421	0.291955	3.61296
tr|A0A318TV55|A0A318TV55_9BRAD	Peptide chain release factor 2 OS	Rhodopseudomonas faecalis OX	0.18423	1.13565	5.54796
tr|A0A318THE9|A0A318THE9_9BRAD	Shikimate kinase OS	Rhodopseudomonas faecalis OX	0.18429	1.2411	5.60269
tr|A0A318T7S5|A0A318T7S5_9BRAD	Isocitrate dehydrogenase [NADP] OS	Rhodopseudomonas faecalis OX	0.18501	1.0685	1.42855
tr|A0A318T9T6|A0A318T9T6_9BRAD	Translation initiation factor IF-2 OS	Rhodopseudomonas faecalis OX	0.18547	1.183	8.44798
tr|A0A318TDV9|A0A318TDV9_9BRAD	1-hydroxycarotenoid 3,4-desaturase OS	Rhodopseudomonas faecalis OX	0.18579	1.12923	4.63519
tr|A0A318TN60|A0A318TN60_9BRAD	Transglutaminase-like putative cysteine protease OS	Rhodopseudomonas faecalis OX	0.1858	0.652951	1.15579
tr|A0A318TU11|A0A318TU11_9BRAD	Phosphoribosyl-AMP cyclohydrolase OS	Rhodopseudomonas faecalis OX	0.18583	0.855569	2.69725
tr|A0A318TEY0|A0A318TEY0_9BRAD	RNA polymerase sigma-54 factor OS	Rhodopseudomonas faecalis OX	0.18619	1.29551	0.261617
tr|A0A318TBV1|A0A318TBV1_9BRAD	NADH dehydrogenase subunit F OS	Rhodopseudomonas faecalis OX	0.18733	1.60337	6.82835
tr|A0A6G8UTI0|A0A6G8UTI0_9ENTR	ATP synthase subunit alpha OS	Citrobacter sp. Y3 OX	0.18768	3.77649	3.46147
tr|A0A318TV67|A0A318TV67_9BRAD	Uncharacterized protein DUF1236 OS	Rhodopseudomonas faecalis OX	0.18812	0.684851	4.01637
tr|A0A0D7F4G1|A0A0D7F4G1_RHOPL	Oxidoreductase OS	Rhodopseudomonas palustris OX	0.1888	0.380362	2.51273
tr|Q210L2|Q210L2_RHOPB	Cysteine synthase OS	Rhodopseudomonas palustris (strain BisB18) OX	0.18891	1.44684	1.43288
tr|A0A318TL61|A0A318TL61_9BRAD	Glutamate synthase (NADH) small subunit OS	Rhodopseudomonas faecalis OX	0.18966	1.06312	7.841
tr|A0A318TE74|A0A318TE74_9BRAD	3-octaprenyl-4-hydroxybenzoate decarboxylase OS	Rhodopseudomonas faecalis OX	0.1902	0.917683	8.14128
tr|A0A318TK07|A0A318TK07_9BRAD	Histidinol dehydrogenase OS	Rhodopseudomonas faecalis OX	0.19043	1.06241	3.66003
tr|A0A318TLV8|A0A318TLV8_9BRAD	Putative N-acetyltransferase YhbS OS	Rhodopseudomonas faecalis OX	0.19123	1.08387	1.75804
tr|A0A318T701|A0A318T701_9BRAD	Chorismate mutase OS	Rhodopseudomonas faecalis OX	0.19164	1.06254	8.82849
tr|A0A6G8URS0|A0A6G8URS0_9ENTR	50S ribosomal protein L9 OS	Citrobacter sp. Y3 OX	0.19294	1.14953	8.8039
tr|A0A318TJK6|A0A318TJK6_9BRAD	Glutathione S-transferase OS	Rhodopseudomonas faecalis OX	0.19308	0.793113	6.21036
tr|A0A318TNW9|A0A318TNW9_9BRAD	Signal transduction histidine kinase OS	Rhodopseudomonas faecalis OX	0.19322	0.780915	2.19087
tr|A0A318TF83|A0A318TF83_9BRAD	Iron-regulated ABC transporter membrane component SufB OS	Rhodopseudomonas faecalis OX	0.19363	0.704514	5.84086
tr|A0A318TH55|A0A318TH55_9BRAD	Leucine--tRNA ligase OS	Rhodopseudomonas faecalis OX	0.19401	1.09611	3.64697
tr|A0A318TK71|A0A318TK71_9BRAD	Nif-specific regulatory protein OS	Rhodopseudomonas faecalis OX	0.19422	0.757307	5.99894
tr|A0A318TRU6|A0A318TRU6_9BRAD	MurNAc alpha-1-phosphate uridylyltransferase OS	Rhodopseudomonas faecalis OX	0.19466	1.12134	8.03558
tr|A0A318TGA1|A0A318TGA1_9BRAD	Polyhydroxyalkanoate synthase OS	Rhodopseudomonas faecalis OX	0.19483	0.753105	4.06038
tr|A0A318TDT0|A0A318TDT0_9BRAD	Uncharacterized protein (TIGR02284 family) OS	Rhodopseudomonas faecalis OX	0.19516	0.695078	5.75957
tr|A0A318TDG9|A0A318TDG9_9BRAD	Chorismate synthase OS	Rhodopseudomonas faecalis OX	0.19566	1.33644	7.18919
tr|A0A318TUA2|A0A318TUA2_9BRAD	NADH-quinone oxidoreductase subunit D OS	Rhodopseudomonas faecalis OX	0.19619	1.29744	2.78662
tr|A0A318T9E1|A0A318T9E1_9BRAD	Putative membrane protein OS	Rhodopseudomonas faecalis OX	0.1962	0.755934	4.83159
tr|A0A6L8YAS7|A0A6L8YAS7_CITAM	Aldehyde dehydrogenase family protein (Fragment) OS	Citrobacter amalonaticus OX	0.19642	1.47676	2.81745
tr|A0A318TBA6|A0A318TBA6_9BRAD	3-isopropylmalate dehydrogenase OS	Rhodopseudomonas faecalis OX	0.19654	1.05304	3.4004
tr|A0A0Q0QTA9|A0A0Q0QTA9_RHOCA	Universal stress protein family protein OS	Rhodobacter capsulatus OX	0.19659	0.662132	8.61871
tr|Q2IX12|Q2IX12_RHOP2	Vitamin B12-dependent ribonucleotide reductase OS	Rhodopseudomonas palustris (strain HaA2) OX	0.19747	1.24482	6.17912
tr|A0A6G8UT15|A0A6G8UT15_9ENTR	Aspartate ammonia-lyase OS	Citrobacter sp. Y3 OX	0.19829	1.89223	3.99887
tr|A0A6G8UFZ7|A0A6G8UFZ7_9ENTR	30S ribosomal protein S7 OS	Citrobacter sp. Y3 OX	0.19831	1.50947	8.63422
tr|A0A0Q0QGF8|A0A0Q0QGF8_RHOCA	Glyoxylate reductase OS	Rhodobacter capsulatus OX	0.19863	1.84992	3.64726
tr|D4BL00|D4BL00_9ENTR	50S ribosomal protein L10 OS	Citrobacter youngae ATCC 29220 OX	0.19993	1.15718	8.20073
tr|A0A318TB74|A0A318TB74_9BRAD	Citronellol/citronellal dehydrogenase OS	Rhodopseudomonas faecalis OX	0.19999	0.978473	3.30097
tr|A0A318TJS7|A0A318TJS7_9BRAD	Bifunctional glutamine synthetase adenylyltransferase/adenylyl-removing enzyme OS	Rhodopseudomonas faecalis OX	0.20055	0.831127	4.83519
tr|E6VD58|E6VD58_RHOPX	LemA family protein OS	Rhodopseudomonas palustris (strain DX-1) OX	0.20135	0.654135	7.28901
tr|A0A318TAM8|A0A318TAM8_9BRAD	NADH-quinone oxidoreductase subunit C/D OS	Rhodopseudomonas faecalis OX	0.20307	0.133789	7.72525
tr|A0A0Q0QUR6|A0A0Q0QUR6_RHOCA	Amino-acid N-acetyltransferase OS	Rhodobacter capsulatus OX	0.2041	0.159238	7.2081
tr|A0A318TCC0|A0A318TCC0_9BRAD	Succinate semialdehyde dehydrogenase OS	Rhodopseudomonas faecalis OX	0.20475	1.17512	4.08659
tr|A0A318TQL9|A0A318TQL9_9BRAD	NAD(P)-dependent dehydrogenase (Short-subunit alcohol dehydrogenase family) OS	Rhodopseudomonas faecalis OX	0.20492	1.35641	0.401923
tr|A0A318TL37|A0A318TL37_9BRAD	Riboflavin synthase alpha chain OS	Rhodopseudomonas faecalis OX	0.2066	1.72092	1.73901
tr|A0A318T6Z1|A0A318T6Z1_9BRAD	2,3,4,5-tetrahydropyridine-2,6-dicarboxylate N-succinyltransferase OS	Rhodopseudomonas faecalis OX	0.20747	1.14914	1.86685
tr|A0A318T9H8|A0A318T9H8_9BRAD	UDP-N-acetylmuramoylalanine--D-glutamate ligase OS	Rhodopseudomonas faecalis OX	0.20763	1.17701	6.33731
tr|A0A4Y9IK35|A0A4Y9IK35_9BACT	Pyruvate kinase OS	Dysgonomonas mossii OX	0.20783	0.814714	7.32899
tr|A0A318TR50|A0A318TR50_9BRAD	50S ribosomal protein L20 OS	Rhodopseudomonas faecalis OX	0.20916	1.07013	8.71337
tr|A0A318TLD3|A0A318TLD3_9BRAD	Peptidyl-prolyl cis-trans isomerase OS	Rhodopseudomonas faecalis OX	0.20925	1.08672	7.37985
tr|F8WVT9|F8WVT9_9BACT	50S ribosomal protein L6 OS	Dysgonomonas mossii DSM 22836 OX	0.20926	1.4154	2.87664
tr|A0A318TJQ1|A0A318TJQ1_9BRAD	3-methyl-2-oxobutanoate hydroxymethyltransferase OS	Rhodopseudomonas faecalis OX	0.21014	0.777427	0.67049
tr|A0A318TCF4|A0A318TCF4_9BRAD	50S ribosomal protein L32 OS	Rhodopseudomonas faecalis OX	0.21021	1.0797	2.89939
tr|A0A2T4J839|A0A2T4J839_RHOBL	Cold-shock protein OS	Rhodobacter blasticus DSM 2131 OX	0.21145	0.500743	1.94497
tr|A0A318U0Z4|A0A318U0Z4_9BRAD	Uncharacterized protein OS	Rhodopseudomonas faecalis OX	0.21152	1.34433	8.84966
tr|A0A318TGU4|A0A318TGU4_9BRAD	ABC-type uncharacterized transport system substrate-binding protein OS	Rhodopseudomonas faecalis OX	0.21211	1.3828	2.29763
tr|A0A318T8C1|A0A318T8C1_9BRAD	Membrane protein insertase YidC OS	Rhodopseudomonas faecalis OX	0.21217	1.33125	5.41359
tr|A0A318TJ16|A0A318TJ16_9BRAD	Methionine--tRNA ligase OS	Rhodopseudomonas faecalis OX	0.21254	1.15068	2.91558
tr|Q2J1K1|Q2J1K1_RHOP2	Transketolase OS	Rhodopseudomonas palustris (strain HaA2) OX	0.21267	1.12437	8.19028
tr|A0A318TJE9|A0A318TJE9_9BRAD	Dihydroorotate dehydrogenase (quinone) OS	Rhodopseudomonas faecalis OX	0.21295	1.22618	5.14996
tr|A0A318TPG1|A0A318TPG1_9BRAD	RNA polymerase sigma-70 factor (ECF subfamily) OS	Rhodopseudomonas faecalis OX	0.21303	2.03949	0.0616263
tr|A0A318TCQ3|A0A318TCQ3_9BRAD	50S ribosomal protein L17 OS	Rhodopseudomonas faecalis OX	0.21333	1.07311	7.02749
tr|A0A318TBY0|A0A318TBY0_9BRAD	Pimeloyl-ACP methyl ester carboxylesterase OS	Rhodopseudomonas faecalis OX	0.2134	1.07348	6.07836
tr|A0A318TTV0|A0A318TTV0_9BRAD	Long-chain acyl-CoA synthetase OS	Rhodopseudomonas faecalis OX	0.2135	1.59761	5.79858
tr|A0A1H8ULD5|A0A1H8ULD5_9BRAD	von Willebrand factor type A domain-containing protein OS	Rhodopseudomonas pseudopalustris OX	0.21383	0.304663	8.91651
tr|A0A318T7U2|A0A318T7U2_9BRAD	Transposase OS	Rhodopseudomonas faecalis OX	0.21436	0.218997	3.51036
tr|A0A6G8UI16|A0A6G8UI16_9ENTR	Fructose-bisphosphate aldolase OS	Citrobacter sp. Y3 OX	0.21493	1.23525	8.96101
tr|A0A318TI42|A0A318TI42_9BRAD	Farnesyl-diphosphate synthase OS	Rhodopseudomonas faecalis OX	0.21498	1.12621	7.28338
tr|A0A318TBW4|A0A318TBW4_9BRAD	Putative Fe-Mo cluster-binding NifX family protein OS	Rhodopseudomonas faecalis OX	0.21525	1.93734	6.98248
tr|A0A318THV6|A0A318THV6_9BRAD	30S ribosomal protein S6 OS	Rhodopseudomonas faecalis OX	0.2156	1.11225	0.0466167
tr|A0A318TL78|A0A318TL78_9BRAD	Dolichol-phosphate mannosyltransferase OS	Rhodopseudomonas faecalis OX	0.21588	1.06447	0.611197
tr|A0A318TAH4|A0A318TAH4_9BRAD	Uncharacterized protein OS	Rhodopseudomonas faecalis OX	0.21589	0.581564	4.87656
tr|A8AJ46|A8AJ46_CITK8	Uncharacterized protein OS	Citrobacter koseri (strain ATCC BAA-895 / CDC 4225-83 / SGSC4696) OX	0.21627	0.707189	5.85447
tr|A0A323U8Y8|A0A323U8Y8_RHOPL	Fumarate hydratase class I OS	Rhodopseudomonas palustris OX	0.21636	1.35753	0.697116
tr|A0A418VQZ0|A0A418VQZ0_RHOPL	RNA-binding protein Hfq OS	Rhodopseudomonas palustris OX	0.217	1.20504	7.72571
tr|A0A318TVS3|A0A318TVS3_9BRAD	Uncharacterized LabA/DUF88 family protein OS	Rhodopseudomonas faecalis OX	0.21708	1.39097	0.178912
tr|A0A6G8UM97|A0A6G8UM97_9ENTR	DNA starvation/stationary phase protection protein OS	Citrobacter sp. Y3 OX	0.21744	1.2087	1.69813
tr|A0A318TLX8|A0A318TLX8_9BRAD	4-hydroxy-3-methylbut-2-enyl diphosphate reductase OS	Rhodopseudomonas faecalis OX	0.21775	0.906827	2.81352
tr|A0A323UNL6|A0A323UNL6_RHOPL	Methylmalonate-semialdehyde dehydrogenase (CoA acylating) OS	Rhodopseudomonas palustris OX	0.21797	1.12556	2.49907
tr|A0A318TN76|A0A318TN76_9BRAD	PTS system mannose-specific IIA component OS	Rhodopseudomonas faecalis OX	0.21804	1.30282	7.23153
tr|A0A2T4JAX5|A0A2T4JAX5_RHOBL	30S ribosomal protein S2 OS	Rhodobacter blasticus DSM 2131 OX	0.21819	1.28213	6.13313
tr|A0A318TAY0|A0A318TAY0_9BRAD	Helix-hairpin-helix protein OS	Rhodopseudomonas faecalis OX	0.21856	0.905502	6.14383
tr|A0A318TEV0|A0A318TEV0_9BRAD	UDP-2-acetamido-3-amino-2,3-dideoxy-glucuronate N-acetyltransferase OS	Rhodopseudomonas faecalis OX	0.21871	1.06088	6.98985
tr|Q6N7B3|Q6N7B3_RHOPA	Uncharacterized protein OS	Rhodopseudomonas palustris (strain ATCC BAA-98 / CGA009) OX	0.21919	1.43518	5.90122
tr|A0A318TBW6|A0A318TBW6_9BRAD	3-oxoadipyl-CoA thiolase OS	Rhodopseudomonas faecalis OX	0.2193	0.421837	1.42724
tr|A0A318TFG1|A0A318TFG1_9BRAD	Indolepyruvate ferredoxin oxidoreductase OS	Rhodopseudomonas faecalis OX	0.21935	1.38102	0.697849
tr|D5APG0|D5APG0_RHOCB	Hydrogenase, small subunit OS	Rhodobacter capsulatus (strain ATCC BAA-309 / NBRC 16581 / SB1003) OX	0.21949	0.576429	2.02332
tr|D5AV93|D5AV93_RHOCB	Uncharacterized protein OS	Rhodobacter capsulatus (strain ATCC BAA-309 / NBRC 16581 / SB1003) OX	0.21966	2.22519	1.29576
tr|Q6N5J5|Q6N5J5_RHOPA	Uncharacterized protein OS	Rhodopseudomonas palustris (strain ATCC BAA-98 / CGA009) OX	0.21993	1.19993	8.39537
tr|A0A318TRX7|A0A318TRX7_9BRAD	Lipopolysaccharide export system protein LptA OS	Rhodopseudomonas faecalis OX	0.22053	1.14457	6.4308
tr|A0A318TGI4|A0A318TGI4_9BRAD	Transcriptional repressor NrdR OS	Rhodopseudomonas faecalis OX	0.22053	1.39424	1.389
tr|A0A318TAZ7|A0A318TAZ7_9BRAD	Methylenetetrahydrofolate reductase OS	Rhodopseudomonas faecalis OX	0.22067	1.16112	7.86873
tr|A0A318TH30|A0A318TH30_9BRAD	Zinc protease OS	Rhodopseudomonas faecalis OX	0.22107	1.13907	7.66634
tr|A0A318TBG0|A0A318TBG0_9BRAD	Sulfide dehydrogenase (Flavocytochrome c) flavoprotein subunit /cytochrome-dependent sulfide dehydrogenase (Flavoprotein) OS	Rhodopseudomonas faecalis OX	0.2216	2.1701	6.55149
tr|A0A318TWD9|A0A318TWD9_9RHOB	Nucleoid-associated protein C8J30_11039 OS	Rhodobacter viridis OX	0.22282	2.70403	1.54186
tr|A0A318TG96|A0A318TG96_9BRAD	NAD(P)H-dependent FMN reductase OS	Rhodopseudomonas faecalis OX	0.2229	1.64944	3.59278
tr|A0A318TFB6|A0A318TFB6_9BRAD	Inorganic pyrophosphatase OS	Rhodopseudomonas faecalis OX	0.22314	1.04164	3.57161
tr|A0A318TAB1|A0A318TAB1_9BRAD	Malate synthase G OS	Rhodopseudomonas faecalis OX	0.22327	1.06271	8.81285
tr|A0A4U1JRB3|A0A4U1JRB3_RHOCA	CoA-acylating methylmalonate-semialdehyde dehydrogenase OS	Rhodobacter capsulatus OX	0.22364	0.775566	6.93787
tr|Q20X29|Q20X29_RHOPB	Uncharacterized protein OS	Rhodopseudomonas palustris (strain BisB18) OX	0.22387	1.07324	5.03275
tr|A0A318T9T3|A0A318T9T3_9BRAD	Glycerol-3-phosphate dehydrogenase [NAD(P)+] OS	Rhodopseudomonas faecalis OX	0.224	1.30638	5.24576
tr|A0A318U0N5|A0A318U0N5_9BRAD	3-hydroxyacyl-[acyl-carrier-protein] dehydratase FabZ OS	Rhodopseudomonas faecalis OX	0.22486	0.749736	4.2458
tr|Q20X34|Q20X34_RHOPB	SCP2 domain-containing protein OS	Rhodopseudomonas palustris (strain BisB18) OX	0.22489	1.15628	6.62654
tr|A0A318TBV9|A0A318TBV9_9BRAD	Gamma-glutamyl phosphate reductase OS	Rhodopseudomonas faecalis OX	0.22497	1.11205	0.446764
tr|A0A318TJ98|A0A318TJ98_9BRAD	Winged helix family two component transcriptional regulator OS	Rhodopseudomonas faecalis OX	0.22502	1.18323	3.57908
tr|A0A318U0S2|A0A318U0S2_9BRAD	Acetyltransferase component of pyruvate dehydrogenase complex OS	Rhodopseudomonas faecalis OX	0.22577	0.746969	1.72398
tr|R8X232|R8X232_9ENTR	30S ribosomal protein S18 OS	Citrobacter sp. KTE151 OX	0.22676	1.19521	2.85866
tr|A0A318T832|A0A318T832_9BRAD	Adenylyltransferase/sulfurtransferase OS	Rhodopseudomonas faecalis OX	0.22716	1.28468	8.30299
tr|A0A318TKS6|A0A318TKS6_9BRAD	Uncharacterized protein OS	Rhodopseudomonas faecalis OX	0.22751	1.15579	4.60645
tr|Q07QU4|Q07QU4_RHOP5	Transcriptional regulator, Crp/Fnr family OS	Rhodopseudomonas palustris (strain BisA53) OX	0.22793	1.32053	2.18441
tr|A0A318TA97|A0A318TA97_9BRAD	Peptidyl-tRNA hydrolase OS	Rhodopseudomonas faecalis OX	0.2282	1.13286	4.19068
tr|A0A318THE7|A0A318THE7_9BRAD	Single-stranded DNA-binding protein OS	Rhodopseudomonas faecalis OX	0.2286	0.936134	5.48195
tr|A0A318TGV6|A0A318TGV6_9BRAD	Acetyl-CoA C-acetyltransferase OS	Rhodopseudomonas faecalis OX	0.229	1.87667	3.01148
tr|A0A318T7C6|A0A318T7C6_9BRAD	GST-like protein OS	Rhodopseudomonas faecalis OX	0.22933	0.849045	1.78312
tr|A0A0Q0VHT0|A0A0Q0VHT0_RHOCA	Chaperone protein DnaK OS	Rhodobacter capsulatus OX	0.2297	1.81835	0.301767
tr|D5AM70|D5AM70_RHOCB	Glucans biosynthesis protein G-1 OS	Rhodobacter capsulatus (strain ATCC BAA-309 / NBRC 16581 / SB1003) OX	0.23076	0.452465	3.37342
tr|A0A318TBQ6|A0A318TBQ6_9BRAD	Histidine kinase OS	Rhodopseudomonas faecalis OX	0.23106	0.860479	8.57726
tr|A0A318TMG1|A0A318TMG1_9BRAD	Uncharacterized protein OS	Rhodopseudomonas faecalis OX	0.23124	0.936688	5.98182
tr|A0A0Q0WIB6|A0A0Q0WIB6_RHOCA	Ferredoxin III OS	Rhodobacter capsulatus OX	0.23177	0.389414	5.34813
tr|A0A4V6WR21|A0A4V6WR21_RHOCA	Nitrogenase iron-molybdenum cofactor biosynthesis protein NifE OS	Rhodobacter capsulatus OX	0.23212	0.82064	2.1133
tr|A0A318TIY6|A0A318TIY6_9BRAD	Amino acid/amide ABC transporter ATP-binding protein 1 (HAAT family) OS	Rhodopseudomonas faecalis OX	0.23281	1.17706	4.85345
tr|A0A318THS6|A0A318THS6_9BRAD	Glutamyl-tRNA(Gln) amidotransferase subunit A OS	Rhodopseudomonas faecalis OX	0.23328	1.10255	8.40004
tr|A0A318TKT0|A0A318TKT0_9BRAD	Uncharacterized protein OS	Rhodopseudomonas faecalis OX	0.2334	0.746718	3.98252
tr|A0A318T9V5|A0A318T9V5_9BRAD	Microcin C transport system substrate-binding protein OS	Rhodopseudomonas faecalis OX	0.23371	0.828648	7.52459
tr|A0A318T9Q5|A0A318T9Q5_9BRAD	Gamma-glutamyltransferase 2 OS	Rhodopseudomonas faecalis OX	0.23463	0.800822	7.95802
sp|Q6N7A6|MTND_RHOPA	Acireductone dioxygenase OS	Rhodopseudomonas palustris (strain ATCC BAA-98 / CGA009) OX	0.23466	0.586972	7.79803
tr|V7EGF8|V7EGF8_9RHOB	Nitrate ABC transporter substrate-binding protein OS	Rhodobacter sp. CACIA14H1 OX	0.23499	1.47266	2.79622
tr|A0A318TKZ3|A0A318TKZ3_9BRAD	NADH dehydrogenase subunit E OS	Rhodopseudomonas faecalis OX	0.23624	1.06354	2.53438
tr|D5ATL1|D5ATL1_RHOCB	Uncharacterized protein OS	Rhodobacter capsulatus (strain ATCC BAA-309 / NBRC 16581 / SB1003) OX	0.23624	0.551771	6.18303
tr|A0A318TDN3|A0A318TDN3_9BRAD	UDP-N-acetylmuramoyl-L-alanyl-D-glutamate--2,6-diaminopimelate ligase OS	Rhodopseudomonas faecalis OX	0.23706	1.49816	2.13247
tr|A0A212JI75|A0A212JI75_9BACT	Nitroreductase domain-containing protein OS	uncultured Dysgonomonas sp. OX	0.23706	0.847706	2.12804
tr|A0A318TDD5|A0A318TDD5_9BRAD	Peptidyl-prolyl cis-trans isomerase OS	Rhodopseudomonas faecalis OX	0.238	0.892663	1.76867
tr|A0A4V5PNZ1|A0A4V5PNZ1_RHOCA	Response regulator OS	Rhodobacter capsulatus OX	0.23807	1.96178	2.5323
tr|A0A2T4JFH6|A0A2T4JFH6_RHOBL	Beta-ketoacyl-ACP reductase OS	Rhodobacter blasticus DSM 2131 OX	0.23811	1.49144	5.45908
tr|D5AL83|D5AL83_RHOCB	dTDP-4-dehydrorhamnose reductase OS	Rhodobacter capsulatus (strain ATCC BAA-309 / NBRC 16581 / SB1003) OX	0.23843	1.30609	8.7764
tr|A0A318T6F2|A0A318T6F2_9BRAD	Acetyl-CoA synthetase OS	Rhodopseudomonas faecalis OX	0.23849	0.619829	1.3185
tr|F8X3I3|F8X3I3_9BACT	Uncharacterized protein OS	Dysgonomonas mossii DSM 22836 OX	0.23871	0.761588	1.80189
tr|A0A318T973|A0A318T973_9BRAD	Flagellar biosynthesis protein FliO OS	Rhodopseudomonas faecalis OX	0.23943	1.13076	6.05544
tr|A0A318TGU3|A0A318TGU3_9BRAD	Glycine--tRNA ligase alpha subunit OS	Rhodopseudomonas faecalis OX	0.23954	0.87662	1.87718
tr|F8WWE7|F8WWE7_9BACT	GFO_IDH_MocA domain-containing protein OS	Dysgonomonas mossii DSM 22836 OX	0.24044	0.62709	1.4034
tr|A0A318TV12|A0A318TV12_9BRAD	Uncharacterized protein OS	Rhodopseudomonas faecalis OX	0.24205	0.901891	2.27648
tr|A0A318TLP0|A0A318TLP0_9BRAD	Transcriptional regulator PpsR OS	Rhodopseudomonas faecalis OX	0.24245	1.10958	8.69027
tr|A0A318TB54|A0A318TB54_9BRAD	Chromosomal replication initiator protein DnaA OS	Rhodopseudomonas faecalis OX	0.24282	1.43553	1.17359
tr|A0A318TGH1|A0A318TGH1_9BRAD	Threonine synthase OS	Rhodopseudomonas faecalis OX	0.2429	1.10837	4.61953
tr|A0A4U1JNM8|A0A4U1JNM8_RHOCA	Fructose-1,6-bisphosphate aldolase OS	Rhodobacter capsulatus OX	0.24332	3.05935	3.04236
tr|A0A318TEM7|A0A318TEM7_9BRAD	Aspartate--tRNA(Asp/Asn) ligase OS	Rhodopseudomonas faecalis OX	0.24343	1.06749	0.832893
tr|A0A318TQM2|A0A318TQM2_9BRAD	Putative Zn-finger protein OS	Rhodopseudomonas faecalis OX	0.24453	1.29308	5.47133
tr|A0A318TPH9|A0A318TPH9_9BRAD	Serine hydroxymethyltransferase OS	Rhodopseudomonas faecalis OX	0.24535	1.08352	1.83178
tr|A0A318TEJ1|A0A318TEJ1_9BRAD	Precorrin-4 C11-methyltransferase OS	Rhodopseudomonas faecalis OX	0.2455	1.13914	4.38101
tr|A0A318TFD2|A0A318TFD2_9BRAD	Phasin OS	Rhodopseudomonas faecalis OX	0.24567	0.857156	8.67805
tr|A0A318TFD4|A0A318TFD4_9BRAD	PBP family phospholipid-binding protein OS	Rhodopseudomonas faecalis OX	0.24582	0.879352	1.01994
tr|A0A0V9JAB0|A0A0V9JAB0_9ENTR	Sulfate transporter subunit OS	Citrobacter sp. 50677481 OX	0.24615	3.03242	8.82205
tr|A0A318TAJ2|A0A318TAJ2_9BRAD	30S ribosomal protein S16 OS	Rhodopseudomonas faecalis OX	0.24624	0.708291	6.53706
tr|A0A6G8UHH3|A0A6G8UHH3_9ENTR	L-asparaginase 2 OS	Citrobacter sp. Y3 OX	0.24687	1.19905	8.09453
tr|A0A318T9P5|A0A318T9P5_9BRAD	D-lactate dehydrogenase (Cytochrome) OS	Rhodopseudomonas faecalis OX	0.24947	1.17978	0.129715
tr|A0A318TMM1|A0A318TMM1_9BRAD	NAD(P)-dependent dehydrogenase (Short-subunit alcohol dehydrogenase family) OS	Rhodopseudomonas faecalis OX	0.24994	1.27162	6.6391
tr|F8WZL5|F8WZL5_9BACT	Superoxide dismutase OS	Dysgonomonas mossii DSM 22836 OX	0.25057	0.816221	8.7636
tr|R8WXF2|R8WXF2_9ENTR	50S ribosomal protein L20 OS	Citrobacter sp. KTE151 OX	0.25112	1.14481	8.62889
tr|A0A318TL23|A0A318TL23_9BRAD	Zinc metalloprotease OS	Rhodopseudomonas faecalis OX	0.2516	2.74968	4.50271
tr|Q213R5|Q213R5_RHOPB	N-acetyl-gamma-glutamyl-phosphate reductase OS	Rhodopseudomonas palustris (strain BisB18) OX	0.25182	0.824387	8.82399
tr|A0A318TER1|A0A318TER1_9BRAD	Malonyl-CoA/methylmalonyl-CoA synthetase OS	Rhodopseudomonas faecalis OX	0.25207	1.28678	4.6857
tr|A0A318TXZ6|A0A318TXZ6_9BRAD	Phosphofructokinase OS	Rhodopseudomonas faecalis OX	0.25249	1.07074	7.03599
tr|A0A318T9Y8|A0A318T9Y8_9BRAD	Uncharacterized protein OS	Rhodopseudomonas faecalis OX	0.25261	1.60453	3.49934
tr|A0A318TI86|A0A318TI86_9BRAD	Short chain enoyl-CoA hydratase /3-hydroxyacyl-CoA dehydrogenase OS	Rhodopseudomonas faecalis OX	0.25301	1.09222	1.40159
tr|A0A318T8B7|A0A318T8B7_9BRAD	Glyoxylate reductase OS	Rhodopseudomonas faecalis OX	0.25323	1.1962	3.52273
tr|A0A318T996|A0A318T996_9BRAD	2-methylcitrate dehydratase PrpD OS	Rhodopseudomonas faecalis OX	0.25431	1.11614	4.86749
tr|A0A318TWV5|A0A318TWV5_9BRAD	4-diphosphocytidyl-2-C-methyl-D-erythritol kinase OS	Rhodopseudomonas faecalis OX	0.25499	0.875287	7.04445
tr|A0A318TK27|A0A318TK27_9BRAD	Iron-sulfur cluster carrier protein OS	Rhodopseudomonas faecalis OX	0.25525	0.850962	7.57939
tr|A0A318TE19|A0A318TE19_9BRAD	3-oxoacyl-[acyl-carrier protein] reductase OS	Rhodopseudomonas faecalis OX	0.25592	1.13268	6.88845
tr|D5AQ24|D5AQ24_RHOCB	Dipeptide ABC transporter, periplasmic dipeptide-binding protein DppA OS	Rhodobacter capsulatus (strain ATCC BAA-309 / NBRC 16581 / SB1003) OX	0.25596	1.29926	2.51697
tr|A0A318TDY7|A0A318TDY7_9BRAD	D-alanyl-D-alanine carboxypeptidase OS	Rhodopseudomonas faecalis OX	0.25667	0.821066	3.88982
tr|A0A318TBR9|A0A318TBR9_9BRAD	Aspartate-semialdehyde dehydrogenase OS	Rhodopseudomonas faecalis OX	0.25858	1.0749	4.81033
tr|A0A318TJ86|A0A318TJ86_9BRAD	Membrane fusion protein (Multidrug efflux system) OS	Rhodopseudomonas faecalis OX	0.25884	0.861262	7.78072
tr|A0A318TIQ7|A0A318TIQ7_9BRAD	Secondary thiamine-phosphate synthase enzyme OS	Rhodopseudomonas faecalis OX	0.25896	2.06143	5.37117
tr|A0A318TNU8|A0A318TNU8_9BRAD	Uncharacterized protein (DUF1330 family) OS	Rhodopseudomonas faecalis OX	0.25916	1.19676	1.56723
tr|A0A318T867|A0A318T867_9BRAD	Putative DNA-binding ribbon-helix-helix protein OS	Rhodopseudomonas faecalis OX	0.25935	1.27493	7.14617
tr|A0A318TFG3|A0A318TFG3_9BRAD	Acyl carrier protein OS	Rhodopseudomonas faecalis OX	0.26002	0.901471	0.880669
tr|Q2IZ61|Q2IZ61_RHOP2	Cold-shock DNA-binding protein family OS	Rhodopseudomonas palustris (strain HaA2) OX	0.26035	0.794391	6.20424
tr|A0A318TEA5|A0A318TEA5_9BRAD	Uncharacterized protein OS	Rhodopseudomonas faecalis OX	0.26042	0.820283	8.68077
tr|A0A318TIK2|A0A318TIK2_9BRAD	HlyD family secretion protein OS	Rhodopseudomonas faecalis OX	0.2627	0.911091	8.82839
tr|A0A318TBC2|A0A318TBC2_9BRAD	Uncharacterized protein OS	Rhodopseudomonas faecalis OX	0.2627	0.853223	5.57951
tr|A0A318TSA5|A0A318TSA5_9BRAD	6-carboxy-5,6,7,8-tetrahydropterin synthase OS	Rhodopseudomonas faecalis OX	0.26299	1.82574	7.27647
tr|A0A318TJ24|A0A318TJ24_9BRAD	Lipoyl synthase OS	Rhodopseudomonas faecalis OX	0.26326	1.37585	0.269722
tr|A0A318THN9|A0A318THN9_9BRAD	Phosphatidylethanolamine N-methyltransferase /phosphatidyl-N-methylethanolamine N-methyltransferase OS	Rhodopseudomonas faecalis OX	0.26344	1.07685	5.7962
tr|A0A318TID8|A0A318TID8_9BRAD	DD-transpeptidase OS	Rhodopseudomonas faecalis OX	0.26351	1.82537	6.33918
sp|Q218M1|RS4_RHOPB	30S ribosomal protein S4 OS	Rhodopseudomonas palustris (strain BisB18) OX	0.26359	0.728879	1.73867
tr|A0A318TQW5|A0A318TQW5_9BRAD	Uncharacterized protein OS	Rhodopseudomonas faecalis OX	0.2639	1.11205	0.867369
tr|A0A318T931|A0A318T931_9BRAD	Diaminopimelate decarboxylase OS	Rhodopseudomonas faecalis OX	0.26461	1.2528	2.58315
tr|A0A318TS26|A0A318TS26_9BRAD	Putative pyruvate, phosphate dikinase regulatory protein OS	Rhodopseudomonas faecalis OX	0.26499	0.778147	0.629348
tr|A0A318TC32|A0A318TC32_9BRAD	dITP/XTP pyrophosphatase OS	Rhodopseudomonas faecalis OX	0.26587	1.25716	3.12214
tr|A0A318TRB2|A0A318TRB2_9BRAD	Cysteine synthase A OS	Rhodopseudomonas faecalis OX	0.26603	0.887665	8.84018
tr|A0A318TM64|A0A318TM64_9BRAD	Cytochrome c-type biogenesis protein CcmE OS	Rhodopseudomonas faecalis OX	0.26615	1.40682	2.2861
tr|A0A318TES2|A0A318TES2_9BRAD	DNA helicase/exodeoxyribonuclease V subunit B OS	Rhodopseudomonas faecalis OX	0.26704	4.31461	2.64919
tr|F8WZS0|F8WZS0_9BACT	Transcriptional regulatory protein rprY OS	Dysgonomonas mossii DSM 22836 OX	0.26735	0.823615	2.4891
tr|A0A318T6Q4|A0A318T6Q4_9BRAD	Phosphoribosyl-ATP pyrophosphatase OS	Rhodopseudomonas faecalis OX	0.26795	1.18635	8.12377
tr|A0A318TI61|A0A318TI61_9BRAD	Putative NADH-flavin reductase OS	Rhodopseudomonas faecalis OX	0.26801	0.841829	6.27142
tr|Q07J60|Q07J60_RHOP5	NAD(P)(+) transhydrogenase (AB-specific) OS	Rhodopseudomonas palustris (strain BisA53) OX	0.26829	3.99912	1.51285
tr|A0A0E2PGZ2|A0A0E2PGZ2_RHOCA	Amino acid ABC transporter substrate-binding protein OS	Rhodobacter capsulatus Y262 OX	0.27015	0.500844	7.41224
tr|D5AM09|D5AM09_RHOCB	30S ribosomal protein S8 OS	Rhodobacter capsulatus (strain ATCC BAA-309 / NBRC 16581 / SB1003) OX	0.2706	1.65781	8.87064
tr|F8WVT1|F8WVT1_9BACT	50S ribosomal protein L16 OS	Dysgonomonas mossii DSM 22836 OX	0.27071	1.28425	8.85301
tr|A0A318TCM0|A0A318TCM0_9BRAD	Formyl-CoA transferase OS	Rhodopseudomonas faecalis OX	0.27127	1.32878	8.99221
PepCalMix	PepCalMix		0.272	0.871287	3.04125
tr|A0A318TBK5|A0A318TBK5_9BRAD	Lon N-terminal domain-containing protein OS	Rhodopseudomonas faecalis OX	0.27211	0.890773	7.32328
tr|A0A318TKB8|A0A318TKB8_9BRAD	Serine acetyltransferase OS	Rhodopseudomonas faecalis OX	0.27282	0.90031	5.40211
tr|A0A318TJS6|A0A318TJS6_9BRAD	Aconitate hydratase OS	Rhodopseudomonas faecalis OX	0.27346	1.0857	5.95607
tr|D5AUL8|D5AUL8_RHOCB	Integration host factor subunit alpha OS	Rhodobacter capsulatus (strain ATCC BAA-309 / NBRC 16581 / SB1003) OX	0.27353	0.561153	4.02632
tr|A0A318TDP2|A0A318TDP2_9BRAD	Uncharacterized protein GlcG (DUF336 family) OS	Rhodopseudomonas faecalis OX	0.27356	0.837904	1.20295
tr|A0A318TJL8|A0A318TJL8_9BRAD	Hydroxyacylglutathione hydrolase OS	Rhodopseudomonas faecalis OX	0.27425	1.09638	8.36488
tr|D2TMA3|D2TMA3_CITRI	60 kDa chaperonin OS	Citrobacter rodentium (strain ICC168) OX	0.27486	1.38126	4.70575
tr|A0A318TFL1|A0A318TFL1_9BRAD	Spermidine/putrescine import ATP-binding protein PotA OS	Rhodopseudomonas faecalis OX	0.27562	1.1181	1.49066
tr|A0A6L5EAQ8|A0A6L5EAQ8_9ENTR	Bacterioferritin OS	Citrobacter sp. NMI7905_11 OX	0.27566	0.290416	0.991895
tr|A0A4Y9INH8|A0A4Y9INH8_9BACT	Cysteine synthase OS	Dysgonomonas mossii OX	0.27747	1.1529	8.44549
tr|A0A318TD04|A0A318TD04_9BRAD	GT2 family glycosyltransferase OS	Rhodopseudomonas faecalis OX	0.27768	0.928283	2.46984
tr|F8WZB9|F8WZB9_9BACT	RRM domain-containing protein OS	Dysgonomonas mossii DSM 22836 OX	0.27781	0.868254	5.84607
tr|A0A318TBA4|A0A318TBA4_9BRAD	NADPH:quinone reductase-like Zn-dependent oxidoreductase OS	Rhodopseudomonas faecalis OX	0.27886	1.09156	8.59393
tr|A0A318TMT0|A0A318TMT0_9BRAD	Acetylglutamate kinase OS	Rhodopseudomonas faecalis OX	0.27924	1.08482	1.91287
tr|A0A318THC9|A0A318THC9_9BRAD	Oxaloacetate decarboxylase OS	Rhodopseudomonas faecalis OX	0.27949	0.885909	1.2262
tr|A0A318TL13|A0A318TL13_9BRAD	Amino acid/amide ABC transporter ATP-binding protein 1 (HAAT family) OS	Rhodopseudomonas faecalis OX	0.27956	1.08524	4.67537
tr|F8X0D5|F8X0D5_9BACT	OmpA-like domain-containing protein OS	Dysgonomonas mossii DSM 22836 OX	0.28109	0.893516	5.59499
tr|A0A318TI22|A0A318TI22_9BRAD	Phosphate starvation-inducible protein PhoH OS	Rhodopseudomonas faecalis OX	0.28147	1.17153	7.74938
tr|A0A318TLC7|A0A318TLC7_9BRAD	Uncharacterized protein OS	Rhodopseudomonas faecalis OX	0.2832	1.23344	3.72809
tr|A0A318T8G1|A0A318T8G1_9BRAD	L,D-transpeptidase-like protein OS	Rhodopseudomonas faecalis OX	0.28382	4.71968	3.35324
tr|A0A1G7G6K6|A0A1G7G6K6_RHOCA	Ferredoxin OS	Rhodobacter capsulatus OX	0.28392	0.395335	7.98828
tr|A0A318TRE8|A0A318TRE8_9BRAD	Pseudouridine synthase OS	Rhodopseudomonas faecalis OX	0.28404	1.22247	8.30562
tr|A0A318TGQ3|A0A318TGQ3_9BRAD	Uncharacterized protein OS	Rhodopseudomonas faecalis OX	0.28411	1.07915	7.87024
tr|A0A318TIE7|A0A318TIE7_9BRAD	3-dehydroquinate dehydratase OS	Rhodopseudomonas faecalis OX	0.28426	1.19172	0.888255
tr|A0A318TDA8|A0A318TDA8_9BRAD	Prolyl-tRNA editing enzyme YbaK/EbsC (Cys-tRNA(Pro) deacylase) OS	Rhodopseudomonas faecalis OX	0.28465	0.642889	2.53241
tr|A0A318TAR1|A0A318TAR1_9BRAD	OOP family OmpA-OmpF porin OS	Rhodopseudomonas faecalis OX	0.28497	1.07913	3.8995
tr|A0A318TN96|A0A318TN96_9BRAD	O-succinylhomoserine sulfhydrylase OS	Rhodopseudomonas faecalis OX	0.28529	1.22292	5.41391
tr|A0A318TA47|A0A318TA47_9BRAD	2Fe-2S ferredoxin OS	Rhodopseudomonas faecalis OX	0.28537	1.09288	2.63478
tr|A0A318TGJ9|A0A318TGJ9_9BRAD	KipI family sensor histidine kinase inhibitor OS	Rhodopseudomonas faecalis OX	0.28538	0.845028	4.00973
tr|A0A318TLT8|A0A318TLT8_9BRAD	NADH-quinone oxidoreductase subunit C OS	Rhodopseudomonas faecalis OX	0.2855	1.20171	1.69141
tr|A0A1G7H8S2|A0A1G7H8S2_RHOCA	Bifunctional enzyme IspD/IspF OS	Rhodobacter capsulatus OX	0.28554	0.743372	0.482764
tr|A0A318TEV8|A0A318TEV8_9BRAD	16S rRNA (Cytosine967-C5)-methyltransferase OS	Rhodopseudomonas faecalis OX	0.28563	1.06523	1.60082
tr|A0A6L5E1U9|A0A6L5E1U9_9ENTR	DNA starvation/stationary phase protection protein Dps OS	Citrobacter sp. NMI7905_11 OX	0.28577	1.2987	8.34199
tr|A0A318THU0|A0A318THU0_9BRAD	Uncharacterized protein YjbJ (UPF0337 family) OS	Rhodopseudomonas faecalis OX	0.28657	0.744442	3.60052
tr|A0A2T4JBL5|A0A2T4JBL5_RHOBL	Transketolase OS	Rhodobacter blasticus DSM 2131 OX	0.28696	0.535534	5.14747
tr|A0A0H5BHY7|A0A0H5BHY7_BLAVI	Nitrogenase molybdenum-iron protein alpha chain OS	Blastochloris viridis OX	0.28719	0.548878	5.41357
tr|D2TUD6|D2TUD6_CITRI	Isocitrate dehydrogenase [NADP] OS	Citrobacter rodentium (strain ICC168) OX	0.28837	1.24411	8.87594
tr|A0A318TI76|A0A318TI76_9BRAD	Ribonuclease BN (tRNA processing enzyme) OS	Rhodopseudomonas faecalis OX	0.28876	0.840447	8.46275
tr|Q2J2U0|Q2J2U0_RHOP2	Acetyl-CoA acetyltransferase OS	Rhodopseudomonas palustris (strain HaA2) OX	0.29028	2.23056	0.708363
tr|F8X117|F8X117_9BACT	DksA C4-type domain-containing protein OS	Dysgonomonas mossii DSM 22836 OX	0.29061	1.74066	0.129673
tr|A0A318T817|A0A318T817_9BRAD	Phosphate import ATP-binding protein PstB OS	Rhodopseudomonas faecalis OX	0.29073	1.33034	4.49339
tr|A0A318TNI3|A0A318TNI3_9BRAD	DNA-binding protein HU-beta OS	Rhodopseudomonas faecalis OX	0.29144	1.07307	3.85071
tr|A0A318TNT9|A0A318TNT9_9BRAD	Uncharacterized protein OS	Rhodopseudomonas faecalis OX	0.29157	1.18619	6.80467
tr|A0A318TF40|A0A318TF40_9BRAD	Biotin carboxylase OS	Rhodopseudomonas faecalis OX	0.29231	1.05311	2.30085
tr|A0A318TDG1|A0A318TDG1_9BRAD	Reaction center protein M chain OS	Rhodopseudomonas faecalis OX	0.29243	0.845686	3.01902
tr|A0A318TCD3|A0A318TCD3_9BRAD	3-phosphoshikimate 1-carboxyvinyltransferase OS	Rhodopseudomonas faecalis OX	0.2933	1.0855	1.99155
tr|A0A318TJA3|A0A318TJA3_9BRAD	Quinol monooxygenase YgiN OS	Rhodopseudomonas faecalis OX	0.29352	1.1639	5.77593
tr|Q07PD8|Q07PD8_RHOP5	Propionyl-CoA carboxylase OS	Rhodopseudomonas palustris (strain BisA53) OX	0.29384	1.22305	1.5107
tr|A0A1G7KVE2|A0A1G7KVE2_RHOCA	Trimethylamine-N-oxide reductase OS	Rhodobacter capsulatus OX	0.29388	0.323274	2.37855
tr|A0A0Q0QL12|A0A0Q0QL12_RHOCA	Uncharacterized conserved protein YjbJ, UPF0337 family OS	Rhodobacter capsulatus OX	0.29504	0.757607	8.49988
tr|A0A0Q0UUU3|A0A0Q0UUU3_RHOCA	Thioredoxin peroxidase OS	Rhodobacter capsulatus OX	0.29574	0.618364	2.67135
tr|A0A318TIA3|A0A318TIA3_9BRAD	Cytochrome b OS	Rhodopseudomonas faecalis OX	0.29605	0.863364	7.78696
tr|A0A318TZ87|A0A318TZ87_9BRAD	Lysozyme family protein OS	Rhodopseudomonas faecalis OX	0.29774	1.4956	8.43199
tr|A0A318TIU3|A0A318TIU3_9BRAD	Amino acid/amide ABC transporter ATP-binding protein 1 (HAAT family) OS	Rhodopseudomonas faecalis OX	0.29804	0.714721	7.3655
tr|A0A318TEZ2|A0A318TEZ2_9BRAD	Microcin C transport system ATP-binding protein OS	Rhodopseudomonas faecalis OX	0.29858	0.771954	1.41642
tr|A0A318T827|A0A318T827_9BRAD	Long-chain acyl-CoA synthetase OS	Rhodopseudomonas faecalis OX	0.29889	0.544428	7.39333
tr|A0A318TTC1|A0A318TTC1_9BRAD	Rhodanese-related sulfurtransferase OS	Rhodopseudomonas faecalis OX	0.30009	1.12196	3.17296
tr|A0A318TKW4|A0A318TKW4_9BRAD	Uncharacterized protein OS	Rhodopseudomonas faecalis OX	0.30025	0.976572	3.37568
tr|A0A318TIU6|A0A318TIU6_9BRAD	Uncharacterized protein OS	Rhodopseudomonas faecalis OX	0.30031	0.945825	2.79151
tr|A0A318TM82|A0A318TM82_9BRAD	Formyl-CoA:oxalate CoA-transferase OS	Rhodopseudomonas faecalis OX	0.30206	1.26019	3.85837
tr|A0A318T747|A0A318T747_9BRAD	EF hand domain-containing protein OS	Rhodopseudomonas faecalis OX	0.30267	0.870409	5.84355
tr|A0A318TFQ0|A0A318TFQ0_9BRAD	5-oxoprolinase subunit A OS	Rhodopseudomonas faecalis OX	0.30288	1.09527	5.19118
tr|A0A318TBF1|A0A318TBF1_9BRAD	Sulfur compound chelating protein SoxZ OS	Rhodopseudomonas faecalis OX	0.30412	0.703956	0.936318
tr|A0A4Y9IQ22|A0A4Y9IQ22_9BACT	Class II fructose-1,6-bisphosphate aldolase OS	Dysgonomonas mossii OX	0.30522	0.918315	1.55575
tr|A0A318TJ55|A0A318TJ55_9BRAD	Uncharacterized protein OS	Rhodopseudomonas faecalis OX	0.30569	1.55779	6.61535
tr|A0A318TDJ5|A0A318TDJ5_9BRAD	PhnB protein OS	Rhodopseudomonas faecalis OX	0.30672	0.862719	6.4573
tr|A0A2T4J8B3|A0A2T4J8B3_RHOBL	Sugar ABC transporter OS	Rhodobacter blasticus DSM 2131 OX	0.30705	1.3711	4.8247
tr|A0A4U1JQZ9|A0A4U1JQZ9_RHOCA	Phosphoenolpyruvate carboxykinase (ATP) OS	Rhodobacter capsulatus OX	0.30857	1.93178	3.09662
tr|A0A318T8X6|A0A318T8X6_9BRAD	Phosphoenolpyruvate--protein phosphotransferase OS	Rhodopseudomonas faecalis OX	0.30907	0.952769	6.80685
tr|A0A318TP38|A0A318TP38_9BRAD	CRISPR system Cascade subunit CasC OS	Rhodopseudomonas faecalis OX	0.30913	1.28935	3.35513
tr|A0A318TI65|A0A318TI65_9BRAD	Molybdopterin synthase subunit MoaD OS	Rhodopseudomonas faecalis OX	0.30938	1.17567	1.51672
tr|A0A318THX5|A0A318THX5_9BRAD	Uncharacterized protein OS	Rhodopseudomonas faecalis OX	0.30943	0.927863	5.01174
tr|A0A318THZ3|A0A318THZ3_9BRAD	Uncharacterized protein OS	Rhodopseudomonas faecalis OX	0.30962	1.14883	5.81871
tr|A0A318TPK4|A0A318TPK4_9BRAD	Uncharacterized protein OS	Rhodopseudomonas faecalis OX	0.30985	0.646538	1.62355
tr|A0A318TEU7|A0A318TEU7_9BRAD	Protein adenylyltransferase SelO OS	Rhodopseudomonas faecalis OX	0.31007	1.37458	3.68413
tr|A0A318TPS4|A0A318TPS4_9BRAD	Sec translocon accessory complex subunit YajC OS	Rhodopseudomonas faecalis OX	0.31039	0.809204	7.86513
tr|E6VPK5|E6VPK5_RHOPX	Sulfate ABC transporter, periplasmic sulfate-binding protein OS	Rhodopseudomonas palustris (strain DX-1) OX	0.31175	0.883048	6.803
tr|Q07UX7|Q07UX7_RHOP5	Succinate--CoA ligase [ADP-forming] subunit alpha OS	Rhodopseudomonas palustris (strain BisA53) OX	0.31224	1.10441	6.01084
tr|A0A318TKQ1|A0A318TKQ1_9BRAD	7-carboxy-7-deazaguanine synthase OS	Rhodopseudomonas faecalis OX	0.31266	0.788216	4.68492
tr|A0A318T7Y0|A0A318T7Y0_9BRAD	Thiamine-phosphate synthase OS	Rhodopseudomonas faecalis OX	0.3133	0.891928	1.24764
tr|A0A318TR67|A0A318TR67_9BRAD	Putative ABC transport system ATP-binding protein OS	Rhodopseudomonas faecalis OX	0.31441	0.576542	6.48712
tr|A0A318TCK2|A0A318TCK2_9BRAD	Adenylyl-sulfate kinase OS	Rhodopseudomonas faecalis OX	0.31566	1.29113	2.81037
tr|D2TMR8|D2TMR8_CITRI	Cold shock-like protein OS	Citrobacter rodentium (strain ICC168) OX	0.31568	0.863629	1.32578
tr|A0A318TKE9|A0A318TKE9_9BRAD	Glutathione S-transferase OS	Rhodopseudomonas faecalis OX	0.31658	1.25426	7.90886
tr|A0A318TTZ6|A0A318TTZ6_9BRAD	Uncharacterized protein (DUF2147 family) OS	Rhodopseudomonas faecalis OX	0.31695	1.0763	0.915152
tr|A0A4Y9IKV9|A0A4Y9IKV9_9BACT	Ferritin OS	Dysgonomonas mossii OX	0.31759	1.20709	3.46904
tr|R8X4P9|R8X4P9_9ENTR	Uncharacterized protein OS	Citrobacter sp. KTE151 OX	0.31843	1.41939	1.64489
tr|A0A318TBX1|A0A318TBX1_9BRAD	Acetyltransferase OS	Rhodopseudomonas faecalis OX	0.31937	0.945457	4.42851
tr|A0A318TF69|A0A318TF69_9BRAD	Phosphopantetheine adenylyltransferase OS	Rhodopseudomonas faecalis OX	0.32111	1.38136	1.26474
tr|A0A318TCL6|A0A318TCL6_9BRAD	Uncharacterized protein OS	Rhodopseudomonas faecalis OX	0.32155	0.757698	2.89805
tr|A8AQB9|A8AQB9_CITK8	Uncharacterized protein OS	Citrobacter koseri (strain ATCC BAA-895 / CDC 4225-83 / SGSC4696) OX	0.32218	1.21348	8.22488
tr|A0A318TJ89|A0A318TJ89_9BRAD	L-threonine aldolase OS	Rhodopseudomonas faecalis OX	0.32246	0.789488	7.46474
tr|A0A318TSJ7|A0A318TSJ7_9BRAD	3-phenylpropionate/trans-cinnamate dioxygenase ferredoxin reductase subunit OS	Rhodopseudomonas faecalis OX	0.32283	1.05617	8.56199
tr|A0A1G7L5P8|A0A1G7L5P8_RHOCA	Protein translocase subunit SecA OS	Rhodobacter capsulatus OX	0.32343	1.40508	2.52295
tr|A0A318TIL9|A0A318TIL9_9BRAD	Uncharacterized protein DUF2852 OS	Rhodopseudomonas faecalis OX	0.32346	0.741686	4.94961
tr|A0A2T4JCB1|A0A2T4JCB1_RHOBL	Multifunctional 2',3'-cyclic-nucleotide 2'-phosphodiesterase/5'-nucleotidase/3'-nucleotidase OS	Rhodobacter blasticus DSM 2131 OX	0.32352	0.845011	5.81604
tr|A0A318TFF6|A0A318TFF6_9BRAD	Uncharacterized protein OS	Rhodopseudomonas faecalis OX	0.3237	0.830665	1.33684
tr|V7EFX9|V7EFX9_9RHOB	Acyl carrier protein OS	Rhodobacter sp. CACIA14H1 OX	0.32377	0.297972	2.10217
tr|A0A318TCB1|A0A318TCB1_9BRAD	Myo-inositol-1(Or 4)-monophosphatase OS	Rhodopseudomonas faecalis OX	0.32401	1.13987	7.62759
tr|A0A0Q0WES2|A0A0Q0WES2_RHOCA	Citrate synthase OS	Rhodobacter capsulatus OX	0.32488	1.23699	4.92555
tr|A0A318TQH8|A0A318TQH8_9BRAD	Acyl-CoA dehydrogenase OS	Rhodopseudomonas faecalis OX	0.32523	1.09763	1.10655
tr|A0A318TGH7|A0A318TGH7_9BRAD	Cysteine desulfurase OS	Rhodopseudomonas faecalis OX	0.32529	0.828621	4.62266
tr|A0A318TGP5|A0A318TGP5_9BRAD	Uncharacterized protein OS	Rhodopseudomonas faecalis OX	0.32627	0.881704	4.46063
tr|R8X784|R8X784_9ENTR	60 kDa chaperonin OS	Citrobacter sp. KTE151 OX	0.32718	1.39911	6.27309
tr|A0A4U1JNR1|A0A4U1JNR1_RHOCA	Cyclic pyranopterin monophosphate synthase OS	Rhodobacter capsulatus OX	0.3273	0.210741	4.10373
tr|A0A318U0K5|A0A318U0K5_9BRAD	NADH-quinone oxidoreductase OS	Rhodopseudomonas faecalis OX	0.32748	1.07487	1.78627
tr|A0A6G8UJ14|A0A6G8UJ14_9ENTR	Succinate dehydrogenase iron-sulfur subunit OS	Citrobacter sp. Y3 OX	0.32839	1.15365	3.0889
tr|A0A318TD79|A0A318TD79_9BRAD	Collagen triple helix repeat protein OS	Rhodopseudomonas faecalis OX	0.32882	0.926652	4.81413
tr|A0A318TDC1|A0A318TDC1_9BRAD	Uncharacterized protein (DUF934 family) OS	Rhodopseudomonas faecalis OX	0.32932	1.14253	3.87199
tr|A0A318TC67|A0A318TC67_9BRAD	Nitric oxide reductase NorQ protein OS	Rhodopseudomonas faecalis OX	0.32996	1.28108	4.04754
sp|Q07ND9|ENO_RHOP5	Enolase OS	Rhodopseudomonas palustris (strain BisA53) OX	0.33004	1.13069	0.715189
tr|A0A318TJU4|A0A318TJU4_9BRAD	DUF853 domain-containing protein OS	Rhodopseudomonas faecalis OX	0.33033	1.18169	1.5717
tr|A0A318TI19|A0A318TI19_9BRAD	2-oxoglutarate ferredoxin oxidoreductase alpha subunit OS	Rhodopseudomonas faecalis OX	0.3304	1.24532	1.06025
tr|A0A318TBD3|A0A318TBD3_9BRAD	Putative RNA-binding protein with PUA-like domain OS	Rhodopseudomonas faecalis OX	0.33057	2.34191	6.16168
tr|A0A318T830|A0A318T830_9BRAD	Ergothioneine biosynthesis protein EgtB OS	Rhodopseudomonas faecalis OX	0.33084	1.28197	3.4013
tr|A0A318TNC8|A0A318TNC8_9BRAD	Dihydrofolate reductase OS	Rhodopseudomonas faecalis OX	0.33108	1.10695	0.0896828
tr|A0A318TUG8|A0A318TUG8_9BRAD	Iron-sulfur cluster assembly accessory protein OS	Rhodopseudomonas faecalis OX	0.33151	1.26245	2.70742
tr|A0A318TJT1|A0A318TJT1_9BRAD	Guanylate kinase OS	Rhodopseudomonas faecalis OX	0.33221	1.68403	4.36009
tr|A0A6L8Y1Q8|A0A6L8Y1Q8_CITAM	Catalase/peroxidase HPI OS	Citrobacter amalonaticus OX	0.33231	0.374518	5.64133
tr|A0A1G7LSD6|A0A1G7LSD6_RHOCA	Pyrophosphate phospho-hydrolase OS	Rhodobacter capsulatus OX	0.33311	0.359529	8.0712
tr|A0A318TI21|A0A318TI21_9BRAD	Peroxiredoxin Q/BCP OS	Rhodopseudomonas faecalis OX	0.33333	0.9006	7.56005
tr|A0A0Q0WDP6|A0A0Q0WDP6_RHOCA	Propionyl-CoA synthetase OS	Rhodobacter capsulatus OX	0.33347	0.493672	5.14196
tr|A0A318TJV9|A0A318TJV9_9BRAD	Tetratricopeptide repeat protein OS	Rhodopseudomonas faecalis OX	0.33612	1.06909	3.17279
tr|A0A318TMI5|A0A318TMI5_9BRAD	Long-chain acyl-CoA synthetase OS	Rhodopseudomonas faecalis OX	0.3372	1.41751	2.28852
tr|A0A318TKT6|A0A318TKT6_9BRAD	Uncharacterized protein OS	Rhodopseudomonas faecalis OX	0.33828	3.12914	4.7358
tr|A0A318TD77|A0A318TD77_9BRAD	N5-carboxyaminoimidazole ribonucleotide mutase OS	Rhodopseudomonas faecalis OX	0.33834	1.11196	5.91946
tr|A0A318TAC4|A0A318TAC4_9BRAD	Acyl-CoA dehydrogenase OS	Rhodopseudomonas faecalis OX	0.33879	1.09977	0.824271
tr|A0A318TFH0|A0A318TFH0_9BRAD	Deoxyribodipyrimidine photo-lyase type I OS	Rhodopseudomonas faecalis OX	0.33895	1.44995	5.01091
tr|A0A318TPG5|A0A318TPG5_9BRAD	Ribonuclease 3 OS	Rhodopseudomonas faecalis OX	0.33912	6.20629	1.35327
tr|A0A318TBL9|A0A318TBL9_9BRAD	HSP20 family molecular chaperone IbpA OS	Rhodopseudomonas faecalis OX	0.33921	1.08392	8.0323
tr|A0A318TKY2|A0A318TKY2_9BRAD	Ribose-5-phosphate isomerase A OS	Rhodopseudomonas faecalis OX	0.33935	0.836048	7.90959
tr|C8S5B1|C8S5B1_9RHOB	Enoyl-[acyl-carrier-protein] reductase [NADH] OS	Rhodobacter sp. SW2 OX	0.34011	0.669957	0.790821
tr|A0A318T6I4|A0A318T6I4_9BRAD	Orotate phosphoribosyltransferase OS	Rhodopseudomonas faecalis OX	0.34051	1.30626	5.84368
tr|Q3J036|Q3J036_RHOS4	Uncharacterized protein OS	Rhodobacter sphaeroides (strain ATCC 17023 / 2.4.1 / NCIB 8253 / DSM 158) OX	0.34062	1.1719	8.04597
tr|B7TYI0|B7TYI0_ECOLX	Phosphate-binding protein PstS OS	Escherichia coli OX	0.34111	4.48036	8.80573
tr|A0A318TA66|A0A318TA66_9BRAD	3-oxoacyl-[acyl-carrier-protein] reductase /acetoacetyl-CoA reductase OS	Rhodopseudomonas faecalis OX	0.34332	1.06769	1.81306
tr|A0A318TTH3|A0A318TTH3_9BRAD	Invasion protein IalB OS	Rhodopseudomonas faecalis OX	0.34337	1.1329	1.06946
tr|A0A318TL40|A0A318TL40_9BRAD	Amino acid/amide ABC transporter substrate-binding protein (HAAT family) OS	Rhodopseudomonas faecalis OX	0.34477	1.35079	2.74009
tr|A0A318TUF3|A0A318TUF3_9BRAD	Parvulin-like PPIase OS	Rhodopseudomonas faecalis OX	0.34587	1.18848	7.57587
tr|D5ARY0|D5ARY0_RHOCB	Nitrogen fixation protein NifX OS	Rhodobacter capsulatus (strain ATCC BAA-309 / NBRC 16581 / SB1003) OX	0.34679	0.324377	5.18856
tr|A0A318TQ15|A0A318TQ15_9BRAD	Zinc protease OS	Rhodopseudomonas faecalis OX	0.34775	1.08259	8.1849
tr|D4B880|D4B880_9ENTR	Ferritin OS	Citrobacter youngae ATCC 29220 OX	0.34879	1.36324	8.16123
tr|A0A318TTD9|A0A318TTD9_9BRAD	L,D-transpeptidase-like protein OS	Rhodopseudomonas faecalis OX	0.34891	1.08995	1.44595
tr|A0A323UJE2|A0A323UJE2_RHOPL	Capsid protein OS	Rhodopseudomonas palustris OX	0.34944	1.17738	8.29301
tr|A0A318T755|A0A318T755_9BRAD	Glutathione S-transferase OS	Rhodopseudomonas faecalis OX	0.34981	1.10314	2.74538
tr|A0A318TCZ7|A0A318TCZ7_9BRAD	Protein-export protein SecB OS	Rhodopseudomonas faecalis OX	0.34994	0.860311	2.01563
tr|A0A4U1JRX7|A0A4U1JRX7_RHOCA	BMP family ABC transporter substrate-binding protein OS	Rhodobacter capsulatus OX	0.35004	1.96553	3.00558
tr|A0A6L5E8N0|A0A6L5E8N0_9ENTR	Elongation factor Ts OS	Citrobacter sp. NMI7905_11 OX	0.35092	1.28171	8.12681
tr|A0A318TH98|A0A318TH98_9BRAD	S1-C subfamily serine protease OS	Rhodopseudomonas faecalis OX	0.35113	8.80521	8.58004
tr|A0A318TM58|A0A318TM58_9BRAD	ADP-ribose pyrophosphatase YjhB (NUDIX family) OS	Rhodopseudomonas faecalis OX	0.35125	1.3265	7.17366
tr|F8WZN2|F8WZN2_9BACT	Ferredoxin OS	Dysgonomonas mossii DSM 22836 OX	0.3532	0.834281	0.651645
tr|A0A318TDJ2|A0A318TDJ2_9BRAD	ABC-2 type transport system ATP-binding protein OS	Rhodopseudomonas faecalis OX	0.35478	0.811362	5.56449
tr|A0A318T8C7|A0A318T8C7_9BRAD	Glyoxylase-like metal-dependent hydrolase (Beta-lactamase superfamily II) OS	Rhodopseudomonas faecalis OX	0.35479	0.776657	1.25282
tr|A0A318TUF2|A0A318TUF2_9BRAD	Replication-associated recombination protein A OS	Rhodopseudomonas faecalis OX	0.35506	1.21779	2.30348
tr|A0A318TPR0|A0A318TPR0_9BRAD	UvrABC system protein A OS	Rhodopseudomonas faecalis OX	0.35553	1.2349	8.61617
tr|A0A318TL79|A0A318TL79_9BRAD	Phosphoadenylylsulfate reductase (Thioredoxin) OS	Rhodopseudomonas faecalis OX	0.35605	1.45799	2.9775
tr|A0A318TNF5|A0A318TNF5_9BRAD	Acyl-CoA hydrolase OS	Rhodopseudomonas faecalis OX	0.35877	1.41241	4.30357
tr|A0A318TFE9|A0A318TFE9_9BRAD	Transketolase OS	Rhodopseudomonas faecalis OX	0.35884	1.09312	8.51548
tr|A0A318TC15|A0A318TC15_9BRAD	Diaminopimelate epimerase OS	Rhodopseudomonas faecalis OX	0.35952	1.12006	3.56899
tr|A0A318TDR0|A0A318TDR0_9BRAD	Uncharacterized protein OS	Rhodopseudomonas faecalis OX	0.36071	0.880882	3.16125
tr|A0A318TNF7|A0A318TNF7_9BRAD	Phosphoribosylformylglycinamidine cyclo-ligase OS	Rhodopseudomonas faecalis OX	0.36151	0.939593	5.98931
tr|A0A318TEM1|A0A318TEM1_9BRAD	SPFH domain-containing protein OS	Rhodopseudomonas faecalis OX	0.36163	1.11647	5.43722
tr|A0A318TK60|A0A318TK60_9BRAD	Fatty-acyl-CoA synthase OS	Rhodopseudomonas faecalis OX	0.36215	1.35615	3.36493
tr|A0A318T916|A0A318T916_9BRAD	Uncharacterized protein OS	Rhodopseudomonas faecalis OX	0.36231	1.09198	3.6314
tr|A0A318TTX1|A0A318TTX1_9BRAD	Acetyltransferase (GNAT) family protein OS	Rhodopseudomonas faecalis OX	0.36468	1.26277	3.1201
tr|A0A318TA94|A0A318TA94_9BRAD	UPF0235 protein BJ122_11611 OS	Rhodopseudomonas faecalis OX	0.36486	1.19816	1.73013
tr|F8WZA8|F8WZA8_9BACT	Uncharacterized protein OS	Dysgonomonas mossii DSM 22836 OX	0.36498	0.64142	0.614086
tr|A0A318TRN9|A0A318TRN9_9BRAD	Peroxiredoxin OS	Rhodopseudomonas faecalis OX	0.36544	1.23186	4.60914
tr|A0A318TMJ3|A0A318TMJ3_9BRAD	Uncharacterized protein DUF2865 OS	Rhodopseudomonas faecalis OX	0.3655	0.851941	1.14393
tr|A0A2T4JEK1|A0A2T4JEK1_RHOBL	Ribosome hibernation promoting factor OS	Rhodobacter blasticus DSM 2131 OX	0.36648	8.02107	8.72606
tr|A0A318TET0|A0A318TET0_9BRAD	3-oxoacyl-[acyl-carrier protein] reductase OS	Rhodopseudomonas faecalis OX	0.3668	0.835425	0.575371
tr|A0A4Y9ILJ2|A0A4Y9ILJ2_9BACT	P-II family nitrogen regulator OS	Dysgonomonas mossii OX	0.36696	0.679487	0.859027
tr|A0A318TAA9|A0A318TAA9_9BRAD	Pyrroline-5-carboxylate reductase OS	Rhodopseudomonas faecalis OX	0.36748	1.06159	1.89506
tr|Q07IA8|Q07IA8_RHOP5	Quinolinate phosphoribosyltransferase [decarboxylating] OS	Rhodopseudomonas palustris (strain BisA53) OX	0.36758	0.768546	5.33402
tr|A0A4Y8L7E6|A0A4Y8L7E6_9BACT	Elongation factor Tu OS	Dysgonomonas capnocytophagoides OX	0.36803	0.69604	2.88069
tr|A0A1N7KX83|A0A1N7KX83_9RHOB	50S ribosomal protein L18 OS	Rhodobacter vinaykumarii OX	0.36826	0.632089	5.65289
tr|Q2IWR2|Q2IWR2_RHOP2	SmpA/OmlA OS	Rhodopseudomonas palustris (strain HaA2) OX	0.36871	1.16151	7.2853
tr|A0A0Q1A1G7|A0A0Q1A1G7_RHOCA	Nitrogenase iron protein OS	Rhodobacter capsulatus OX	0.3689	0.405576	6.98195
tr|A0A182D5C7|A0A182D5C7_BLAVI	Enoyl-[acyl-carrier-protein] reductase [NADH] OS	Blastochloris viridis OX	0.36931	0.931968	1.70589
tr|D5ARX0|D5ARX0_RHOCB	Nitrogenase-stabilizing/protective protein NifW OS	Rhodobacter capsulatus (strain ATCC BAA-309 / NBRC 16581 / SB1003) OX	0.36969	0.50444	2.66063
tr|A0A318TDR9|A0A318TDR9_9BRAD	Uncharacterized protein DUF2478 OS	Rhodopseudomonas faecalis OX	0.36982	0.767993	0.828064
tr|R8X157|R8X157_9ENTR	Hydrolase OS	Citrobacter sp. KTE151 OX	0.37076	1.16322	7.6394
tr|A0A318T8A3|A0A318T8A3_9BRAD	Prephenate dehydrogenase OS	Rhodopseudomonas faecalis OX	0.37097	0.850117	4.40877
tr|A0A318U0V8|A0A318U0V8_9BRAD	Light-harvesting protein B-800-850 beta chain OS	Rhodopseudomonas faecalis OX	0.37113	1.50758	3.0799
tr|A0A6L5E7N6|A0A6L5E7N6_9ENTR	Molecular chaperone DnaK OS	Citrobacter sp. NMI7905_11 OX	0.37121	1.29411	1.32248
tr|Q07UB3|Q07UB3_RHOP5	Succinate dehydrogenase flavoprotein subunit OS	Rhodopseudomonas palustris (strain BisA53) OX	0.37123	0.831896	7.30688
tr|A0A318TU49|A0A318TU49_9BRAD	Acetyltransferase (GNAT) family protein OS	Rhodopseudomonas faecalis OX	0.37139	0.710122	8.12673
tr|A0A318TQ41|A0A318TQ41_9BRAD	Dihydroxy-acid dehydratase OS	Rhodopseudomonas faecalis OX	0.37175	1.03803	7.62868
tr|A0A318TJ09|A0A318TJ09_9BRAD	Uncharacterized protein DUF2848 OS	Rhodopseudomonas faecalis OX	0.37291	0.961497	3.84015
tr|A0A2S4RX85|A0A2S4RX85_CITAM	Chaperone protein DnaK OS	Citrobacter amalonaticus OX	0.37339	6.71358	4.70378
tr|A0A318TNU1|A0A318TNU1_9BRAD	Uncharacterized protein OS	Rhodopseudomonas faecalis OX	0.37351	0.779755	4.27981
tr|A0A318TA93|A0A318TA93_9BRAD	50S ribosomal protein L4 OS	Rhodopseudomonas faecalis OX	0.3736	1.06622	3.0506
tr|A0A318TI55|A0A318TI55_9BRAD	Uncharacterized protein OS	Rhodopseudomonas faecalis OX	0.37459	1.08396	4.79502
tr|A0A318THC1|A0A318THC1_9BRAD	Protease inhibitor Inh OS	Rhodopseudomonas faecalis OX	0.37526	1.06573	4.43258
tr|A0A318TCX0|A0A318TCX0_9BRAD	UPF0434 protein BJ122_11275 OS	Rhodopseudomonas faecalis OX	0.37589	1.17637	0.505858
tr|A0A0Q0UEJ4|A0A0Q0UEJ4_RHOCA	Glycine betaine/proline transport system substrate-binding protein OS	Rhodobacter capsulatus OX	0.37669	0.588773	8.32461
tr|A0A318TCJ0|A0A318TCJ0_9BRAD	Sulfate/thiosulfate import ATP-binding protein CysA OS	Rhodopseudomonas faecalis OX	0.37687	0.916442	8.91696
tr|A0A318TFC6|A0A318TFC6_9BRAD	HemY protein OS	Rhodopseudomonas faecalis OX	0.37712	1.06776	8.70245
tr|A0A318T7Z4|A0A318T7Z4_9BRAD	4-hydroxy-tetrahydrodipicolinate synthase OS	Rhodopseudomonas faecalis OX	0.37718	0.864699	7.55408
tr|A0A318T7Y9|A0A318T7Y9_9BRAD	Acetyl-coenzyme A carboxylase carboxyl transferase subunit alpha OS	Rhodopseudomonas faecalis OX	0.37724	1.08328	0.261885
tr|A0A318TAP4|A0A318TAP4_9BRAD	APH domain-containing protein OS	Rhodopseudomonas faecalis OX	0.37855	1.26408	8.59171
tr|R8WPF8|R8WPF8_9ENTR	Uridine phosphorylase OS	Citrobacter sp. KTE151 OX	0.37894	1.32191	7.90588
tr|R8WYT0|R8WYT0_9ENTR	DNA-binding protein HU-beta OS	Citrobacter sp. KTE151 OX	0.37902	1.13123	4.01225
tr|A0A6N8DJZ5|A0A6N8DJZ5_RHOAC	Aldose 1-epimerase family protein OS	Rhodoblastus acidophilus OX	0.37923	1.52436	8.52577
tr|A0A318TK49|A0A318TK49_9BRAD	Tryptophanase OS	Rhodopseudomonas faecalis OX	0.37982	1.06491	2.15649
tr|A0A318TJ03|A0A318TJ03_9BRAD	Transcription antitermination protein NusB OS	Rhodopseudomonas faecalis OX	0.38	1.10555	5.62122
tr|A0A318TW29|A0A318TW29_9BRAD	7-cyano-7-deazaguanine synthase OS	Rhodopseudomonas faecalis OX	0.38078	5.61883	2.75559
tr|A0A318TSI0|A0A318TSI0_9BRAD	Pyruvate kinase OS	Rhodopseudomonas faecalis OX	0.38182	1.14018	7.23785
tr|A0A318TKF6|A0A318TKF6_9BRAD	Uncharacterized protein (TIGR02300 family) OS	Rhodopseudomonas faecalis OX	0.38254	1.09907	7.22092
tr|A0A0N8VEY8|A0A0N8VEY8_RHOCA	30S ribosomal protein S13 OS	Rhodobacter capsulatus OX	0.38355	1.98535	2.45759
tr|A0A318TAN2|A0A318TAN2_9BRAD	Glycine oxidase OS	Rhodopseudomonas faecalis OX	0.38357	1.18597	1.40388
tr|D5AUJ3|D5AUJ3_RHOCB	Isocitrate dehydrogenase [NADP] OS	Rhodobacter capsulatus (strain ATCC BAA-309 / NBRC 16581 / SB1003) OX	0.38372	2.33759	4.5146
tr|A0A318TQ18|A0A318TQ18_9BRAD	1,4-alpha-glucan branching enzyme GlgB OS	Rhodopseudomonas faecalis OX	0.38386	1.12594	0.521133
tr|A0A6M1U4J1|A0A6M1U4J1_9RHOB	Uncharacterized protein OS	Rhodobacter sp. HX-7-19 OX	0.38386	1.09539	1.39671
tr|A0A220QAV6|A0A220QAV6_CITFR	Ketodeoxygluconokinase OS	Citrobacter freundii OX	0.38426	1.34275	6.92991
tr|A0A318T9F4|A0A318T9F4_9BRAD	Ribosomal protein L11 methyltransferase OS	Rhodopseudomonas faecalis OX	0.38655	1.04982	2.69666
tr|A0A318TAL2|A0A318TAL2_9BRAD	Phosphoribosylformylglycinamidine synthase subunit PurQ OS	Rhodopseudomonas faecalis OX	0.38661	1.04004	3.47049
tr|A0A318TAE0|A0A318TAE0_9BRAD	Bifunctional protein HldE OS	Rhodopseudomonas faecalis OX	0.38701	1.12388	2.16586
tr|A0A318TGV5|A0A318TGV5_9BRAD	Tripartite ATP-independent transporter DctP family solute receptor OS	Rhodopseudomonas faecalis OX	0.38709	1.13501	8.94342
tr|Q2IWI3|Q2IWI3_RHOP2	DUF3597 domain-containing protein OS	Rhodopseudomonas palustris (strain HaA2) OX	0.38797	0.838938	7.60982
tr|A0A318TM80|A0A318TM80_9BRAD	UDP-glucose 4-epimerase OS	Rhodopseudomonas faecalis OX	0.38799	0.935187	4.18455
tr|Q13CL0|Q13CL0_RHOPS	Response regulator receiver OS	Rhodopseudomonas palustris (strain BisB5) OX	0.38818	1.07741	0.287632
tr|A0A4Y9IPM0|A0A4Y9IPM0_9BACT	Phosphoglycerate kinase OS	Dysgonomonas mossii OX	0.38887	0.895747	7.37379
tr|A0A318TDR6|A0A318TDR6_9BRAD	L-amino acid N-acyltransferase YncA OS	Rhodopseudomonas faecalis OX	0.38943	1.32373	1.94027
tr|A0A2T4J4F7|A0A2T4J4F7_RHOBL	30S ribosomal protein S7 OS	Rhodobacter blasticus DSM 2131 OX	0.38974	0.869366	3.17148
tr|A0A318TCN1|A0A318TCN1_9BRAD	Ribosome hibernation promoting factor OS	Rhodopseudomonas faecalis OX	0.39024	0.934099	7.23357
tr|A0A318TCZ8|A0A318TCZ8_9BRAD	UDP-N-acetyl-D-glucosamine dehydrogenase OS	Rhodopseudomonas faecalis OX	0.39033	2.84774	8.76508
tr|D5AQ14|D5AQ14_RHOCB	Cobaltochelatase, CobS subunit OS	Rhodobacter capsulatus (strain ATCC BAA-309 / NBRC 16581 / SB1003) OX	0.39081	1.45211	4.93497
tr|A0A4Y9ISK3|A0A4Y9ISK3_9BACT	60 kDa chaperonin OS	Dysgonomonas mossii OX	0.39135	0.849838	4.44284
tr|A0A1G7C5G3|A0A1G7C5G3_RHOCA	3-oxoacid CoA-transferase subunit B OS	Rhodobacter capsulatus OX	0.3918	1.21979	4.74187
tr|A0A318THQ7|A0A318THQ7_9BRAD	Carbamoyl-phosphate synthase small chain OS	Rhodopseudomonas faecalis OX	0.39238	1.10273	0.934296
tr|A0A318THV8|A0A318THV8_9BRAD	Ribosomal RNA large subunit methyltransferase J OS	Rhodopseudomonas faecalis OX	0.39279	1.19098	8.76359
tr|A0A318T6V2|A0A318T6V2_9BRAD	O-acetyl-ADP-ribose deacetylase (Regulator of RNase III) OS	Rhodopseudomonas faecalis OX	0.39296	0.913392	1.35663
tr|A0A318T8K0|A0A318T8K0_9BRAD	DNA gyrase subunit B OS	Rhodopseudomonas faecalis OX	0.39333	1.13196	5.73572
tr|D5ALF8|D5ALF8_RHOCB	DNA-binding protein HU-1 OS	Rhodobacter capsulatus (strain ATCC BAA-309 / NBRC 16581 / SB1003) OX	0.39447	0.697408	4.20122
tr|A0A318TL15|A0A318TL15_9BRAD	NADPH-dependent 7-cyano-7-deazaguanine reductase OS	Rhodopseudomonas faecalis OX	0.39456	0.913404	2.19011
tr|A0A318TI31|A0A318TI31_9BRAD	Protein-disulfide isomerase OS	Rhodopseudomonas faecalis OX	0.39612	1.10842	8.06248
tr|A0A521IGY0|A0A521IGY0_9SPIO	NifU_N domain-containing protein OS	Treponema sp. OX	0.39627	0.885264	1.50858
tr|F8WVU3|F8WVU3_9BACT	50S ribosomal protein L15 OS	Dysgonomonas mossii DSM 22836 OX	0.39638	1.15471	2.49516
tr|A0A318TI57|A0A318TI57_9BRAD	Alpha-methylacyl-CoA racemase OS	Rhodopseudomonas faecalis OX	0.39772	0.696557	5.58191
tr|A0A318TCF2|A0A318TCF2_9BRAD	Uncharacterized protein OS	Rhodopseudomonas faecalis OX	0.39779	0.937908	1.33979
tr|A0A318TMH5|A0A318TMH5_9BRAD	Secreted protein OS	Rhodopseudomonas faecalis OX	0.3988	0.906155	2.32729
tr|A0A318TQG9|A0A318TQG9_9BRAD	Uncharacterized protein OS	Rhodopseudomonas faecalis OX	0.39908	1.10699	5.52771
tr|A0A318TFX1|A0A318TFX1_9BRAD	Leucyl/phenylalanyl-tRNA--protein transferase OS	Rhodopseudomonas faecalis OX	0.39997	1.30762	5.58783
tr|A0A318THH3|A0A318THH3_9BRAD	Protein-export membrane protein SecF OS	Rhodopseudomonas faecalis OX	0.40027	0.89174	4.58352
tr|R8WXU1|R8WXU1_9ENTR	Major outer membrane lipoprotein Lpp OS	Citrobacter sp. KTE151 OX	0.40048	0.818182	2.11294
tr|A0A318TDI6|A0A318TDI6_9BRAD	NAD(P)-dependent dehydrogenase (Short-subunit alcohol dehydrogenase family) OS	Rhodopseudomonas faecalis OX	0.40078	0.918991	5.92194
tr|A0A2T4J6W2|A0A2T4J6W2_RHOBL	Amino acid ABC transporter substrate-binding protein OS	Rhodobacter blasticus DSM 2131 OX	0.40089	0.766532	0.130579
tr|A0A318TAF4|A0A318TAF4_9BRAD	NADH dehydrogenase OS	Rhodopseudomonas faecalis OX	0.4023	0.895331	2.57601
tr|A0A318TKV0|A0A318TKV0_9BRAD	Uncharacterized protein (DUF849 family) OS	Rhodopseudomonas faecalis OX	0.40241	0.900636	3.18732
tr|A0A318TGM7|A0A318TGM7_9BRAD	Ribonuclease T2 OS	Rhodopseudomonas faecalis OX	0.40256	0.942039	3.89217
tr|A0A318TKS9|A0A318TKS9_9BRAD	Bifunctional NAD(P)H-hydrate repair enzyme OS	Rhodopseudomonas faecalis OX	0.40354	1.19802	3.70601
tr|A0A1G7LZB8|A0A1G7LZB8_RHOCA	NitT/TauT family transport system substrate-binding protein OS	Rhodobacter capsulatus OX	0.40423	0.570021	2.42628
tr|A0A318TBQ1|A0A318TBQ1_9BRAD	Ferredoxin OS	Rhodopseudomonas faecalis OX	0.40462	1.07824	4.2062
tr|A0A2T4J5D5|A0A2T4J5D5_RHOBL	Iron ABC transporter substrate-binding protein OS	Rhodobacter blasticus DSM 2131 OX	0.4051	0.828219	1.79378
tr|A0A2T4JDT6|A0A2T4JDT6_RHOBL	Spermidine/putrescine ABC transporter substrate-binding protein OS	Rhodobacter blasticus DSM 2131 OX	0.4056	0.857591	5.73715
tr|A0A1G7JIL5|A0A1G7JIL5_RHOCA	Metal-dependent carboxypeptidase OS	Rhodobacter capsulatus OX	0.40569	1.68162	6.69851
tr|Q07HA2|Q07HA2_RHOP5	4-hydroxybenzoyl-CoA thioesterase OS	Rhodopseudomonas palustris (strain BisA53) OX	0.40594	1.11091	3.99328
tr|Q21AW7|Q21AW7_RHOPB	Cold-shock DNA-binding protein family OS	Rhodopseudomonas palustris (strain BisB18) OX	0.4061	0.792543	5.14113
tr|A0A318TKD8|A0A318TKD8_9BRAD	Uncharacterized protein DUF3298 OS	Rhodopseudomonas faecalis OX	0.40663	0.806971	7.45669
tr|A0A0N8VG28|A0A0N8VG28_RHOCA	Biotin carboxylase OS	Rhodobacter capsulatus OX	0.40665	0.472669	2.93225
tr|A0A4U1JZZ2|A0A4U1JZZ2_RHOCA	Nitrogenase protein alpha chain OS	Rhodobacter capsulatus OX	0.40684	0.577776	8.46958
tr|D5AUK6|D5AUK6_RHOCB	Hemolysin-type calcium-binding repeat family protein OS	Rhodobacter capsulatus (strain ATCC BAA-309 / NBRC 16581 / SB1003) OX	0.40688	1.36191	6.61385
tr|A0A1G7HUJ3|A0A1G7HUJ3_RHOCA	Malonyl CoA-acyl carrier protein transacylase OS	Rhodobacter capsulatus OX	0.40763	1.60013	2.63041
tr|A0A318TGY2|A0A318TGY2_9BRAD	Invasion protein IalB OS	Rhodopseudomonas faecalis OX	0.40775	1.05878	3.21371
tr|R8X0U3|R8X0U3_9ENTR	50S ribosomal protein L32 OS	Citrobacter sp. KTE151 OX	0.40839	1.45796	1.49257
tr|A0A0N0KGW4|A0A0N0KGW4_9BRAD	GCN5 family acetyltransferase OS	Rhodopseudomonas sp. AAP120 OX	0.40851	0.468611	4.07185
tr|A0A2T4J891|A0A2T4J891_RHOBL	Cysteine desulfurase OS	Rhodobacter blasticus DSM 2131 OX	0.4088	1.08062	8.29836
tr|A0A318T9V8|A0A318T9V8_9BRAD	Amino acid/amide ABC transporter substrate-binding protein (HAAT family) OS	Rhodopseudomonas faecalis OX	0.40923	0.915393	8.3462
tr|A0A1G7E1D2|A0A1G7E1D2_RHOCA	Branched-chain amino acid transport system substrate-binding protein OS	Rhodobacter capsulatus OX	0.40989	0.654	0.602625
tr|A0A318TEE0|A0A318TEE0_9BRAD	Uncharacterized protein OS	Rhodopseudomonas faecalis OX	0.411	1.25087	7.86097
tr|A0A318TA91|A0A318TA91_9BRAD	CBS domain protein OS	Rhodopseudomonas faecalis OX	0.41123	1.05954	2.54171
tr|A0A318TAM1|A0A318TAM1_9BRAD	S-methyl-5'-thioadenosine phosphorylase OS	Rhodopseudomonas faecalis OX	0.4129	1.08596	5.55007
tr|A0A336JMH5|A0A336JMH5_9BRAD	Sulfide dehydrogenase (Flavoprotein) subunit SudA /sulfide dehydrogenase (Flavoprotein) subunit SudB OS	Rhodopseudomonas pentothenatexigens OX	0.41376	1.18932	3.25227
tr|A0A0Q0UFJ2|A0A0Q0UFJ2_RHOCA	50S ribosomal protein L31 OS	Rhodobacter capsulatus OX	0.41424	1.29231	5.96866
tr|A0A4Y9ISX4|A0A4Y9ISX4_9BACT	Xanthan lyase OS	Dysgonomonas mossii OX	0.41439	0.60207	5.97775
tr|A0A318T896|A0A318T896_9BRAD	UDP-N-acetylglucosamine--N-acetylmuramyl-(pentapeptide) pyrophosphoryl-undecaprenol N-acetylglucosamine transferase OS	Rhodopseudomonas faecalis OX	0.41483	1.05462	7.35177
tr|A0A318TJN9|A0A318TJN9_9BRAD	Phosphatidylserine decarboxylase proenzyme OS	Rhodopseudomonas faecalis OX	0.4167	0.847819	6.51777
tr|D2TQC3|D2TQC3_CITRI	Glutamine ABC transporter, substrate-binding protein OS	Citrobacter rodentium (strain ICC168) OX	0.41736	0.836255	5.10614
tr|A0A318TFF2|A0A318TFF2_9BRAD	N5-carboxyaminoimidazole ribonucleotide synthase OS	Rhodopseudomonas faecalis OX	0.41762	0.859538	2.27821
tr|A0A318TVQ2|A0A318TVQ2_9BRAD	Transcription-repair-coupling factor OS	Rhodopseudomonas faecalis OX	0.4187	0.864622	8.81951
tr|A0A318TFA2|A0A318TFA2_9BRAD	ATP-dependent Clp protease adapter protein ClpS OS	Rhodopseudomonas faecalis OX	0.41908	1.24342	0.950996
tr|A0A318TBI0|A0A318TBI0_9BRAD	NADH dehydrogenase subunit G OS	Rhodopseudomonas faecalis OX	0.41916	0.859988	5.45719
tr|A0A4Y9IN52|A0A4Y9IN52_9BACT	SusC/RagA family TonB-linked outer membrane protein OS	Dysgonomonas mossii OX	0.41934	0.913553	0.267697
tr|A0A4U1JS92|A0A4U1JS92_RHOCA	Acetyl-CoA C-acetyltransferase OS	Rhodobacter capsulatus OX	0.42073	1.28702	8.4248
tr|A0A318U067|A0A318U067_9BRAD	CubicO group peptidase (Beta-lactamase class C family) OS	Rhodopseudomonas faecalis OX	0.42091	0.695766	3.98807
tr|A0A318TEN0|A0A318TEN0_9BRAD	Glycerol kinase OS	Rhodopseudomonas faecalis OX	0.42189	0.857962	1.23394
tr|A0A318TCP3|A0A318TCP3_9BRAD	Branched-chain-amino-acid aminotransferase OS	Rhodopseudomonas faecalis OX	0.42502	0.949307	2.93195
tr|A0A318U804|A0A318U804_9RHOB	ATP synthase subunit delta OS	Rhodobacter viridis OX	0.4254	1.97952	8.83271
tr|A0A318TB06|A0A318TB06_9BRAD	Alkyl sulfatase BDS1-like metallo-beta-lactamase superfamily hydrolase OS	Rhodopseudomonas faecalis OX	0.42588	1.13023	6.79699
tr|A0A318TL73|A0A318TL73_9BRAD	Diguanylate cyclase/phosphodiesterase with PAS/PAC sensor(S) OS	Rhodopseudomonas faecalis OX	0.42596	1.30849	4.90903
tr|A0A318T9B7|A0A318T9B7_9BRAD	3-dehydroquinate synthase OS	Rhodopseudomonas faecalis OX	0.42631	1.23395	5.72248
tr|Q3J0X3|Q3J0X3_RHOS4	Cold-shock DNA-binding protein family OS	Rhodobacter sphaeroides (strain ATCC 17023 / 2.4.1 / NCIB 8253 / DSM 158) OX	0.42675	1.32169	0.574018
tr|A0A318TE09|A0A318TE09_9BRAD	Nucleoid DNA-binding protein OS	Rhodopseudomonas faecalis OX	0.42754	0.908281	0.406408
tr|A0A318T8R5|A0A318T8R5_9BRAD	16S rRNA (Cytosine967-C5)-methyltransferase OS	Rhodopseudomonas faecalis OX	0.4278	1.13573	6.27428
tr|A0A318TEF8|A0A318TEF8_9BRAD	Microcystin-dependent protein OS	Rhodopseudomonas faecalis OX	0.42816	0.620073	0.0424918
tr|A0A318TTM6|A0A318TTM6_9BRAD	G3E family GTPase OS	Rhodopseudomonas faecalis OX	0.42872	0.916826	0.413733
tr|A0A6L5E7P3|A0A6L5E7P3_9ENTR	RNA chaperone ProQ OS	Citrobacter sp. NMI7905_11 OX	0.42998	1.35396	3.27797
tr|A0A2W5NP25|A0A2W5NP25_RHOSU	RNA polymerase sigma factor OS	Rhodovulum sulfidophilum OX	0.42999	1.04456	7.18785
tr|F8X0N4|F8X0N4_9BACT	HlyD_D23 domain-containing protein OS	Dysgonomonas mossii DSM 22836 OX	0.4308	0.945729	3.84389
tr|A0A318TA67|A0A318TA67_9BRAD	Uncharacterized protein OS	Rhodopseudomonas faecalis OX	0.43156	0.748634	4.40758
tr|Q3IYB3|Q3IYB3_RHOS4	Amino acid/amide ABC transporter substrate-binding protein, HAAT family OS	Rhodobacter sphaeroides (strain ATCC 17023 / 2.4.1 / NCIB 8253 / DSM 158) OX	0.43231	1.16735	6.33023
tr|A0A318THJ9|A0A318THJ9_9BRAD	50S ribosomal protein L9 OS	Rhodopseudomonas faecalis OX	0.43322	1.07377	7.3648
tr|D5ARW5|D5ARW5_RHOCB	NifT/FixU family protein OS	Rhodobacter capsulatus (strain ATCC BAA-309 / NBRC 16581 / SB1003) OX	0.43332	0.700032	3.68788
tr|A0A318TC30|A0A318TC30_9BRAD	UDP-N-acetylmuramoyl-tripeptide--D-alanyl-D-alanine ligase OS	Rhodopseudomonas faecalis OX	0.43395	1.0615	5.35781
tr|A0A318TIL3|A0A318TIL3_9BRAD	FkbM family methyltransferase OS	Rhodopseudomonas faecalis OX	0.43645	0.903453	7.84804
tr|A0A318TDQ0|A0A318TDQ0_9BRAD	Magnesium chelatase accessory protein OS	Rhodopseudomonas faecalis OX	0.43697	1.44945	6.41393
tr|A0A318T9A3|A0A318T9A3_9BRAD	Fis family two component transcriptional regulator OS	Rhodopseudomonas faecalis OX	0.43762	1.10271	2.45254
tr|A0A318TKX4|A0A318TKX4_9BRAD	Methionine import ATP-binding protein MetN OS	Rhodopseudomonas faecalis OX	0.43818	1.13219	3.61512
tr|A0A318T8F9|A0A318T8F9_9BRAD	Uncharacterized protein DUF992 OS	Rhodopseudomonas faecalis OX	0.43819	1.09298	1.68343
tr|Q6N690|Q6N690_RHOPA	Riboflavin synthase alpha chain OS	Rhodopseudomonas palustris (strain ATCC BAA-98 / CGA009) OX	0.43819	1.07905	4.47137
tr|D5AN48|D5AN48_RHOCB	ATP-dependent Clp protease ATP-binding subunit ClpX OS	Rhodobacter capsulatus (strain ATCC BAA-309 / NBRC 16581 / SB1003) OX	0.43954	0.772537	6.08033
tr|D5ANF0|D5ANF0_RHOCB	Uncharacterized protein OS	Rhodobacter capsulatus (strain ATCC BAA-309 / NBRC 16581 / SB1003) OX	0.43967	0.604026	0.556105
tr|A0A318TR66|A0A318TR66_9BRAD	Nucleotide-binding universal stress UspA family protein OS	Rhodopseudomonas faecalis OX	0.43997	1.28783	7.18653
tr|A0A318TFM6|A0A318TFM6_9BRAD	Aspartyl/glutamyl-tRNA(Asn/Gln) amidotransferase subunit B OS	Rhodopseudomonas faecalis OX	0.44084	1.07632	4.59037
tr|A0A318TI78|A0A318TI78_9BRAD	Histidine--tRNA ligase OS	Rhodopseudomonas faecalis OX	0.44098	1.20108	2.77784
tr|A0A318TGT1|A0A318TGT1_9BRAD	DUF815 domain-containing protein OS	Rhodopseudomonas faecalis OX	0.44122	0.879241	1.68313
tr|A0A318TEG2|A0A318TEG2_9BRAD	Carbamoyltransferase OS	Rhodopseudomonas faecalis OX	0.4417	1.46062	7.92742
tr|D2TKN8|D2TKN8_CITRI	Universal stress protein OS	Citrobacter rodentium (strain ICC168) OX	0.44204	1.22723	8.20811
tr|D5AM20|D5AM20_RHOCB	30S ribosomal protein S11 OS	Rhodobacter capsulatus (strain ATCC BAA-309 / NBRC 16581 / SB1003) OX	0.44212	1.66596	4.96061
tr|A0A1G7FUV5|A0A1G7FUV5_RHOCA	Adenylate kinase OS	Rhodobacter capsulatus OX	0.44227	1.23878	2.77326
tr|A0A6L8Y672|A0A6L8Y672_CITAM	Succinate dehydrogenase flavoprotein subunit OS	Citrobacter amalonaticus OX	0.44416	0.712202	3.02074
tr|A0A318TDB9|A0A318TDB9_9BRAD	Uncharacterized protein OS	Rhodopseudomonas faecalis OX	0.44447	0.882839	3.67582
tr|A0A318TDH4|A0A318TDH4_9BRAD	Acetoin utilization deacetylase AcuC-like enzyme OS	Rhodopseudomonas faecalis OX	0.44539	0.93596	2.57886
tr|R8WRM4|R8WRM4_9ENTR	50S ribosomal protein L19 OS	Citrobacter sp. KTE151 OX	0.44566	1.15744	1.09455
tr|A0A318TMB0|A0A318TMB0_9BRAD	Enamine deaminase RidA (YjgF/YER057c/UK114 family) OS	Rhodopseudomonas faecalis OX	0.44569	1.06269	8.17388
tr|A0A0Q0WLH2|A0A0Q0WLH2_RHOCA	Lipoprotein-anchoring transpeptidase ErfK/SrfK OS	Rhodobacter capsulatus OX	0.44644	0.709969	4.16192
tr|A0A1Q9QMC7|A0A1Q9QMC7_RHOSU	Phosphoribosylformylglycinamidine cyclo-ligase OS	Rhodovulum sulfidophilum OX	0.44696	1.13421	6.41654
tr|A0A2T4JCI5|A0A2T4JCI5_RHOBL	BMP family ABC transporter substrate-binding protein OS	Rhodobacter blasticus DSM 2131 OX	0.44908	0.833411	8.24773
tr|A0A318THI8|A0A318THI8_9BRAD	Catalase-peroxidase OS	Rhodopseudomonas faecalis OX	0.44913	0.938623	5.64955
tr|A0A318T911|A0A318T911_9BRAD	Uncharacterized protein OS	Rhodopseudomonas faecalis OX	0.44929	0.894881	7.05673
tr|A0A318TNL3|A0A318TNL3_9BRAD	Uncharacterized protein OS	Rhodopseudomonas faecalis OX	0.45085	1.23392	2.01469
tr|A0A318U0U8|A0A318U0U8_9BRAD	CheY-like chemotaxis protein OS	Rhodopseudomonas faecalis OX	0.45133	1.28123	6.84353
tr|A0A6G8ULL8|A0A6G8ULL8_9ENTR	Aldehyde-alcohol dehydrogenase OS	Citrobacter sp. Y3 OX	0.45212	0.626499	1.43308
tr|A0A318TK36|A0A318TK36_9BRAD	Putative sulfurylase large subunit (Molybdopterin cytosine dinucleotide biosynthesis) OS	Rhodopseudomonas faecalis OX	0.45241	0.939555	2.94562
tr|A0A6G8UJ30|A0A6G8UJ30_9ENTR	Universal stress protein UspG OS	Citrobacter sp. Y3 OX	0.45257	0.873791	4.04651
tr|A0A318TFN3|A0A318TFN3_9BRAD	Rubrerythrin OS	Rhodopseudomonas faecalis OX	0.4527	0.904555	8.56046
tr|A0A0F6TZ83|A0A0F6TZ83_CITAM	Esterase OS	Citrobacter amalonaticus Y19 OX	0.45316	1.35678	3.31219
tr|A0A2T4J8J1|A0A2T4J8J1_RHOBL	50S ribosomal protein L3 OS	Rhodobacter blasticus DSM 2131 OX	0.45393	0.444218	4.95054
tr|A0A318TEA2|A0A318TEA2_9BRAD	Glutaredoxin OS	Rhodopseudomonas faecalis OX	0.4542	1.1924	4.18589
tr|A0A1G7P0M8|A0A1G7P0M8_RHOCA	30S ribosomal protein S1 OS	Rhodobacter capsulatus OX	0.45447	0.501429	3.26789
tr|A0A318TFX4|A0A318TFX4_9BRAD	23S rRNA m(5)U-1939 methyltransferase OS	Rhodopseudomonas faecalis OX	0.45451	1.07131	8.61864
tr|A0A318TBI4|A0A318TBI4_9BRAD	MoxR-like ATPase OS	Rhodopseudomonas faecalis OX	0.45467	1.09296	3.01811
tr|A0A418VM34|A0A418VM34_RHOPL	Argininosuccinate synthase OS	Rhodopseudomonas palustris OX	0.45489	0.888348	2.52266
tr|A0A318TNY1|A0A318TNY1_9BRAD	Porin OS	Rhodopseudomonas faecalis OX	0.45521	1.05482	0.945684
tr|A0A2T4J3W1|A0A2T4J3W1_RHOBL	ABC transporter substrate-binding protein (Fragment) OS	Rhodobacter blasticus DSM 2131 OX	0.45565	0.783191	3.81749
tr|A0A2T4JB22|A0A2T4JB22_RHOBL	50S ribosomal protein L9 OS	Rhodobacter blasticus DSM 2131 OX	0.45594	0.739167	2.05276
tr|A0A318TK61|A0A318TK61_9BRAD	Putative peroxidase-related enzyme OS	Rhodopseudomonas faecalis OX	0.45649	1.41245	0.106517
tr|A0A318TFS8|A0A318TFS8_9BRAD	Universal stress protein family protein OS	Rhodopseudomonas faecalis OX	0.45701	1.08208	8.93403
tr|D2TTZ2|D2TTZ2_CITRI	Autoinducer 2-binding protein LsrB OS	Citrobacter rodentium (strain ICC168) OX	0.45721	1.28503	2.43833
tr|A0A318TBB4|A0A318TBB4_9BRAD	Ubiquinone/menaquinone biosynthesis C-methyltransferase UbiE OS	Rhodopseudomonas faecalis OX	0.45735	1.06836	4.24856
tr|A0A318TBM7|A0A318TBM7_9BRAD	Ribonuclease D OS	Rhodopseudomonas faecalis OX	0.45773	1.03003	2.66033
tr|A0A318T7Z9|A0A318T7Z9_9BRAD	Uncharacterized protein OS	Rhodopseudomonas faecalis OX	0.45818	1.10381	3.15083
tr|A0A318TAU6|A0A318TAU6_9BRAD	4-alpha-glucanotransferase OS	Rhodopseudomonas faecalis OX	0.45837	1.09161	6.37326
tr|A0A318TXU7|A0A318TXU7_9BRAD	Hpr(Ser) kinase/phosphatase OS	Rhodopseudomonas faecalis OX	0.45921	0.949867	1.42485
tr|A0A318TJX3|A0A318TJX3_9BRAD	Thiosulfate/3-mercaptopyruvate sulfurtransferase OS	Rhodopseudomonas faecalis OX	0.45926	1.11736	5.32737
tr|A0A318TDP3|A0A318TDP3_9BRAD	Putative membrane-anchored protein OS	Rhodopseudomonas faecalis OX	0.45939	1.0673	4.29961
tr|A0A318TWM7|A0A318TWM7_9RHOB	Acetyl-CoA acetyltransferase OS	Rhodobacter viridis OX	0.45945	0.42109	6.61159
tr|A0A1G7GFY2|A0A1G7GFY2_RHOCA	Geranylgeranyl reductase OS	Rhodobacter capsulatus OX	0.46004	1.75581	7.2173
tr|A0A318TDM3|A0A318TDM3_9BRAD	Acetyl-CoA synthetase OS	Rhodopseudomonas faecalis OX	0.46029	1.09875	2.98595
tr|A0A323UC60|A0A323UC60_RHOPL	Glycine--tRNA ligase beta subunit OS	Rhodopseudomonas palustris OX	0.46039	0.893305	3.54887
tr|A0A4U1JU30|A0A4U1JU30_RHOCA	ABC transporter substrate-binding protein OS	Rhodobacter capsulatus OX	0.46103	0.537173	6.19793
tr|A0A318TW21|A0A318TW21_9BRAD	Phosphoribosyl 1,2-cyclic phosphate phosphodiesterase OS	Rhodopseudomonas faecalis OX	0.46149	1.08002	2.05782
tr|A0A318TQZ6|A0A318TQZ6_9BRAD	Ribonuclease J OS	Rhodopseudomonas faecalis OX	0.46161	1.04852	4.33567
tr|A0A1G7GLB7|A0A1G7GLB7_RHOCA	Beta-methylmalyl-CoA dehydratase OS	Rhodobacter capsulatus OX	0.46193	1.37376	2.35374
tr|A0A285D4B0|A0A285D4B0_9RHOB	HlyD family secretion protein OS	Rhodobacter ovatus OX	0.46261	1.27556	8.74435
tr|A0A318TIK8|A0A318TIK8_9BRAD	Uncharacterized protein OS	Rhodopseudomonas faecalis OX	0.46359	0.943742	3.19003
tr|A0A318TLH1|A0A318TLH1_9BRAD	DNA repair exonuclease SbcCD nuclease subunit OS	Rhodopseudomonas faecalis OX	0.46407	1.06918	0.0984963
tr|A0A318T905|A0A318T905_9BRAD	Flagellar basal body protein OS	Rhodopseudomonas faecalis OX	0.4642	0.855213	1.01007
tr|A0A4U1K369|A0A4U1K369_RHOCA	NifX-associated nitrogen fixation protein OS	Rhodobacter capsulatus OX	0.46434	0.763456	7.99211
tr|A0A318TBU4|A0A318TBU4_9BRAD	Bifunctional uridylyltransferase/uridylyl-removing enzyme OS	Rhodopseudomonas faecalis OX	0.46448	0.910761	5.79193
tr|A0A318TAK8|A0A318TAK8_9BRAD	Citrate lyase subunit beta/citryl-CoA lyase OS	Rhodopseudomonas faecalis OX	0.46486	0.971623	4.18612
tr|A0A318TDD6|A0A318TDD6_9BRAD	YARHG domain-containing protein OS	Rhodopseudomonas faecalis OX	0.46583	1.22579	0.863298
tr|A0A318TL28|A0A318TL28_9BRAD	Carbamoyl-phosphate synthase large chain OS	Rhodopseudomonas faecalis OX	0.46641	1.09736	0.930951
tr|E6VHD5|E6VHD5_RHOPX	Glycosyl transferase group 1 OS	Rhodopseudomonas palustris (strain DX-1) OX	0.46665	1.18203	6.25571
tr|F8WXS7|F8WXS7_9BACT	HTH asnC-type domain-containing protein OS	Dysgonomonas mossii DSM 22836 OX	0.46728	1.36772	5.17388
tr|A0A1N7KVN8|A0A1N7KVN8_9RHOB	Phosphoenolpyruvate carboxykinase (ATP) OS	Rhodobacter vinaykumarii OX	0.46838	0.806742	2.55263
[truncated: 984 more rows]

## Sheet: HighOC
Peak Name	Group	Columna1	p-value	Fold Change	# peptides2
[truncated: 1,048,575+ more rows]

[truncated: 1 more sheets: HighN]
